# Supplementary material for: Stationary Atrial Fibrillation Properties in the Goat Do Not Entail Stable or Recurrent Conduction Patterns
Source: Front Physiol. 2018 Jul 27;9:947. doi: 10.3389/fphys.2018.00947 (PMC6072874; doi:10.3389/fphys.2018.00947)
Supplement: Supplementary file 1 [file Data_Sheet_1.ZIP]

Archive with 25 entries (24 files):
- Goat_10_Property maps.xlsx
- __MACOSX/
- __MACOSX/._Goat_10_Property maps.xlsx
- Goat_11_Property maps.xlsx
- __MACOSX/._Goat_11_Property maps.xlsx
- Goat_12_Property maps.xlsx
- __MACOSX/._Goat_12_Property maps.xlsx
- Goat_1_Property maps.xlsx
- __MACOSX/._Goat_1_Property maps.xlsx
- Goat_2_Property maps.xlsx
- __MACOSX/._Goat_2_Property maps.xlsx
- Goat_3_Property maps.xlsx
- __MACOSX/._Goat_3_Property maps.xlsx
- Goat_4_Property maps.xlsx
- __MACOSX/._Goat_4_Property maps.xlsx
- Goat_5_Property maps.xlsx
- __MACOSX/._Goat_5_Property maps.xlsx
- Goat_6_Property maps.xlsx
- __MACOSX/._Goat_6_Property maps.xlsx
- Goat_7_Property maps.xlsx
- __MACOSX/._Goat_7_Property maps.xlsx
- Goat_8_Property maps.xlsx
- __MACOSX/._Goat_8_Property maps.xlsx
- Goat_9_Property maps.xlsx
- __MACOSX/._Goat_9_Property maps.xlsx
