# Supplementary material for: Stationary Atrial Fibrillation Properties in the Goat Do Not Entail Stable or Recurrent Conduction Patterns
Source: Front Physiol. 2018 Jul 27;9:947. doi: 10.3389/fphys.2018.00947 (PMC6072874; doi:10.3389/fphys.2018.00947)
Supplement: Supplementary file 1 [file Data_Sheet_1.ZIP › Goat_1_Property maps.xlsx]

## Sheet: AFCL
AFCL
Signals of insufficient quality were excluded from the property maps. Signals could be rejected based on noise low amplitude, large artefact or ventricluar farfields that could not be substracted.
		1	2	3	4	5	6	7	8	9	10	11	12	13	14	15	16	17
1	1					0.14437	0.144851	0.146295	0.149182	0.151107	0.150144	0.148219	0.149182	0.149182					1																		1
	2					0.146295	0.147257	0.148219	0.151107	0.153032	0.153994	0.149182	0.150144	0.153994	0.153032
	3			0.149182	0.147257	0.149182	0.151107	0.150144	0.149182	0.153994	0.153032	0.150144	0.150144	0.153994	0.153032	0.152069
	4		0.153032	0.150144	0.151107	0.151107	0.151107	0.150144	0.148219	0.153513	0.150144	0.152069	0.156882	0.153032	0.150144	0.153032	0.151107
	5	0.153994	0.153032	0.151107	0.147257	0.148219	0.149182	0.149182	0.150144	0.153032	0.149182	0.152551	0.153994	0.153994	0.147257	0.148219	0.150144	0.149182
	6	0.152069	0.153513	0.149182	0.145332	0.143407	0.148219	0.149663	0.150144	0.153994	0.149182	0.153032	0.151107	0.156882	0.149182	0.142445	0.147257	0.147257
	7	0.151107	0.149182	0.146295	0.14437	0.142445	0.147257	0.150144		0.150144	0.149182	0.152069	0.150144	0.153032	0.153513	0.146295	0.141001	0.147257
	8	0.152069	0.150144	0.148219	0.14437	0.142445	0.146295	0.150144			0.147257	0.149663	0.149182	0.151107	0.155919	0.149182	0.141482	0.14052
	9	0.153032	0.151107	0.148701	0.143888	0.142926	0.147257	0.149182	0.148701	0.145332	0.143407	0.145332	0.148219	0.150144	0.151588	0.152069	0.147257	0.140038
	10	0.149182	0.148219	0.149182	0.147257	0.14437	0.146295	0.147257	0.144851	0.14437	0.143407	0.141482	0.145332	0.148219	0.150144	0.146295	0.14437	0.139557
	11	0.148219	0.145332	0.14437	0.145332	0.14437	0.14437	0.145332	0.142445	0.142445	0.143407	0.141482	0.142445	0.146295	0.145332	0.143407	0.142445	0.138595
	12	0.142445	0.141482	0.142445	0.14437	0.145332	0.143407	0.14052	0.141482	0.143407	0.143407	0.142445	0.142445	0.143407	0.142445	0.14052	0.138595	0.137632
	13	0.146295	0.143407	0.142445	0.14052	0.141482	0.14052	0.139557	0.139557	0.142445	0.142445	0.142445	0.142445	0.142445	0.14052	0.137632	0.137632	0.135707
	14		0.147257	0.141482	0.139557	0.139557	0.139557	0.139557	0.139557	0.14052	0.139557	0.141482	0.14052	0.139557	0.138595	0.13667	0.13667
	15			0.141482	0.139557	0.139557	0.139557	0.138595	0.138595	0.138114	0.138595	0.137632	0.138595	0.137632	0.13667	0.13667
	16				0.139557	0.14052	0.14052	0.139557	0.137632	0.13667	0.137632	0.13667	0.13667	0.13667	0.13667
	17					0.138595	0.139557	0.137632	0.13667	0.13667	0.13667	0.13667	0.136189	0.13667
2	1					0.145332	0.146295	0.145332	0.146295	0.145332	0.146295	0.146295	0.146295	0.146295					2																		2
	2					0.143407	0.146295	0.148219	0.147257	0.149182	0.147257	0.145332	0.146295	0.147257	0.150144
	3			0.146295	0.145332	0.146295	0.148219	0.147257	0.146295	0.149182	0.148219	0.146295	0.148219	0.152069	0.150144	0.149182
	4		0.149182	0.147257	0.148219	0.149182	0.149182	0.146295	0.147257	0.149182	0.147257	0.147738	0.151107	0.151107	0.148219	0.149182	0.148219
	5	0.153032	0.150144	0.148219	0.145332	0.143407	0.146295	0.145332	0.145332	0.148219	0.145332	0.150144	0.150144	0.152551	0.146295	0.146295	0.147257	0.146295
	6	0.149182	0.149182	0.147257	0.143407	0.141482	0.14437	0.145332	0.147257	0.149182	0.146295	0.149182	0.149182	0.153032	0.148701	0.141001	0.14437	0.145332
	7	0.149182	0.147257	0.145332	0.142445	0.14052	0.142445	0.147257		0.146295	0.146295	0.150144	0.148219	0.150144	0.151107	0.14437	0.138595	0.143407
	8	0.149182	0.149182	0.145813	0.142445	0.139557	0.143407	0.147738			0.14437	0.147257	0.148219	0.149182	0.153032	0.146295	0.139557	0.13667
	9	0.150144	0.148219	0.145332	0.143407	0.141482	0.14437	0.148219	0.146295	0.143407	0.141482	0.142445	0.146295	0.147257	0.150626	0.149182	0.145332	0.13667
	10	0.147257	0.145332	0.145332	0.14437	0.142445	0.14437	0.146295	0.14437	0.142445	0.14052	0.139557	0.143407	0.146295	0.147257	0.14437	0.14437	0.13667
	11	0.14437	0.142445	0.142445	0.143407	0.143407	0.142445	0.143407	0.14052	0.14052	0.141482	0.139557	0.14052	0.145332	0.14437	0.143407	0.141482	0.13667
	12	0.143407	0.14052	0.143407	0.143407	0.142926	0.140038	0.137632	0.138595	0.139557	0.141482	0.141482	0.14052	0.143407	0.142445	0.14052	0.137632	0.13667
	13	0.145332	0.142445	0.141482	0.139557	0.139557	0.137632	0.135707	0.13667	0.138595	0.141482	0.14052	0.14052	0.141482	0.14052	0.138595	0.137632	0.134745
	14		0.145332	0.141482	0.138595	0.138595	0.138595	0.134745	0.133782	0.13667	0.137632	0.138595	0.137632	0.138595	0.137632	0.13667	0.134745
	15			0.14052	0.138595	0.138595	0.138595	0.13667	0.13282	0.134745	0.135707	0.135707	0.135707	0.135707	0.135707	0.135707
	16				0.138595	0.139076	0.138595	0.137632	0.134745	0.133782	0.133782	0.134745	0.133782	0.133782	0.133782
	17					0.137632	0.13667	0.134745	0.133782	0.133782	0.133782	0.13282	0.133782	0.133782
3	1					0.146295	0.147257	0.147257	0.147257	0.148219	0.148219	0.148219	0.149182	0.146295					3																		3
	2					0.145332	0.146295	0.148219	0.148219	0.151107	0.149663	0.148219	0.148219	0.152551	0.153032
	3			0.149182	0.148219	0.149182	0.150144	0.150144	0.148219	0.152069	0.153994	0.148219	0.151107	0.152069	0.152069	0.150144
	4		0.152551	0.148219	0.150626	0.152069	0.151107	0.149182	0.148219	0.152069	0.151107	0.151107	0.156882	0.153032	0.150144	0.150144	0.149182
	5	0.153994	0.153032	0.152069	0.148219	0.149182	0.149182	0.147738	0.148219	0.150144	0.149182	0.151107	0.155919	0.153032	0.147257	0.147257	0.149182	0.148219
	6	0.152069	0.153032	0.151107	0.146295	0.146295	0.146776	0.148219	0.149182	0.151107	0.148219	0.153994	0.153032	0.157844	0.149182	0.143407	0.145332	0.146295
	7	0.150144	0.148219	0.148219	0.147257	0.14437	0.146295	0.148219		0.149182	0.147257	0.153032	0.152069	0.156882	0.152069	0.147257	0.14052	0.145332
	8	0.150144	0.149182	0.148219	0.145332	0.14437	0.146295	0.149182			0.145332	0.149182	0.151107	0.152551	0.155919	0.151107	0.142445	0.139557
	9	0.153032	0.151107	0.149182	0.146295	0.146295	0.147738	0.150144	0.149182	0.145332	0.142445	0.14437	0.150144	0.151107	0.151107	0.151107	0.149182	0.139557
	10	0.150144	0.149182	0.150144	0.148219	0.146295	0.147257	0.149663	0.147257	0.143407	0.142445	0.141482	0.145332	0.149182	0.150144	0.147257	0.146776	0.14052
	11	0.149182	0.146295	0.149182	0.149182	0.146295	0.146295	0.145332	0.141482	0.143407	0.143407	0.141482	0.142445	0.147257	0.146295	0.146295	0.14437	0.14052
	12	0.146295	0.143407	0.14437	0.14437	0.145332	0.14437	0.138595	0.14052	0.141482	0.142445	0.141482	0.142445	0.145332	0.145332	0.143407	0.14052	0.139557
	13	0.147257	0.14437	0.142445	0.141482	0.141482	0.14052	0.138595	0.137632	0.141482	0.142445	0.143407	0.141482	0.142445	0.141482	0.139557	0.138595	0.13667
	14		0.147257	0.143407	0.141482	0.14052	0.139557	0.137632	0.13667	0.138595	0.14052	0.14052	0.14052	0.14052	0.139557	0.138595	0.137632
	15			0.142445	0.141482	0.141001	0.141482	0.139557	0.137632	0.137632	0.138595	0.138595	0.137632	0.137632	0.138595	0.137632
	16				0.14052	0.141482	0.142445	0.14052	0.137632	0.13667	0.13667	0.137632	0.13667	0.137632	0.137632
	17					0.138595	0.139557	0.138595	0.13667	0.135707	0.135707	0.135707	0.13667	0.13667
4	1					0.145332	0.146295	0.146776	0.147257	0.149182	0.149182	0.148219	0.147257	0.149182					4																		4
	2					0.145332	0.148219	0.148701	0.148219	0.151107	0.151107	0.148219	0.151107	0.151588	0.155919
	3			0.147257	0.147257	0.148219	0.150144	0.150144	0.147257	0.151107	0.153032	0.151107	0.153032	0.149663	0.152069	0.151107
	4		0.151107	0.150144	0.151107	0.152069	0.151107	0.149182	0.148219	0.152069	0.150144	0.151107	0.155919	0.152069	0.150144	0.152069	0.150144
	5	0.153032	0.153032	0.153032	0.149182	0.148219	0.148219	0.149182	0.148219	0.151107	0.148219	0.152069	0.151588	0.149182	0.146295	0.147257	0.148219	0.147257
	6	0.151107	0.153994	0.152069	0.147257	0.146295	0.146295	0.148219	0.149663	0.149182	0.147257	0.152069	0.150144	0.153032	0.148219	0.142445	0.146295	0.146295
	7	0.149182	0.150144	0.148219	0.146295	0.14437	0.145332	0.149182		0.148219	0.147257	0.151107	0.149182	0.152069	0.150144	0.145332	0.14052	0.145332
	8	0.150144	0.150144	0.148219	0.147257	0.14437	0.145332	0.149182			0.146295	0.148219	0.149182	0.151107	0.154957	0.150144	0.14052	0.137632
	9	0.151107	0.151107	0.147257	0.146295	0.145332	0.147257	0.150144	0.148219	0.145332	0.142445	0.14437	0.148219	0.150144	0.153994	0.151107	0.146295	0.137632
	10	0.148219	0.146295	0.146295	0.147257	0.146295	0.147257	0.149182	0.146295	0.145332	0.143407	0.142445	0.146295	0.147257	0.149182	0.145332	0.14437	0.138595
	11	0.146295	0.142445	0.14437	0.146295	0.146295	0.145332	0.145332	0.142445	0.143407	0.14437	0.141482	0.143407	0.146295	0.145332	0.143407	0.141482	0.13667
	12	0.14437	0.142445	0.142445	0.143407	0.145332	0.142445	0.138595	0.14052	0.142445	0.14437	0.142445	0.142445	0.14437	0.143407	0.14052	0.137632	0.13667
	13	0.149182	0.145332	0.142445	0.139557	0.14052	0.139557	0.138114	0.137632	0.142445	0.143407	0.142445	0.142445	0.142445	0.138595	0.137632	0.13667	0.135707
	14		0.148219	0.141963	0.139557	0.138595	0.139557	0.138595	0.13667	0.138595	0.139557	0.141482	0.14052	0.138595	0.13667	0.13667	0.134745
	15			0.141482	0.139557	0.14052	0.139557	0.138595	0.13667	0.13667	0.137632	0.137632	0.137632	0.13667	0.135707	0.135707
	16				0.139557	0.139557	0.14052	0.139557	0.13667	0.135707	0.135707	0.135707	0.135707	0.135707	0.135707
	17					0.138595	0.138595	0.137632	0.13667	0.134745	0.134745	0.134745	0.135707	0.135707
5	1					0.146295	0.146295	0.146295	0.147257	0.146295	0.145332	0.146295	0.147257	0.149182					5																		5
	2					0.145813	0.146295	0.147257	0.147257	0.150144	0.147257	0.146295	0.148219	0.151588	0.153032
	3			0.148219	0.146295	0.147257	0.150144	0.147257	0.146295	0.149182	0.148701	0.146295	0.150144	0.153032	0.152069	0.150144
	4		0.152069	0.151107	0.151107	0.152069	0.151107	0.148219	0.147257	0.151107	0.148219	0.147257	0.151107	0.152069	0.150144	0.150144	0.149182
	5	0.152069	0.153032	0.151107	0.150144	0.148219	0.149182	0.148219	0.147257	0.150144	0.146295	0.148219	0.151107	0.153032	0.146295	0.148219	0.149182	0.147257
	6	0.151107	0.152069	0.148219	0.146295	0.145332	0.147257	0.147257	0.148219	0.149182	0.146295	0.149182	0.147257	0.153032	0.146295	0.14052	0.145332	0.145332
	7	0.150144	0.149182	0.146295	0.14437	0.143407	0.146295	0.148701		0.147257	0.147257	0.149182	0.147738	0.152069	0.150144	0.142445	0.138595	0.14437
	8	0.149182	0.149182	0.146295	0.142445	0.142445	0.145332	0.149182			0.146295	0.148219	0.147257	0.150144	0.154957	0.147257	0.138595	0.137632
	9	0.152069	0.151107	0.147257	0.143407	0.145332	0.146295	0.150144	0.147257	0.14437	0.143407	0.143407	0.148219	0.148219	0.152551	0.149182	0.14437	0.13667
	10	0.150144	0.148219	0.148219	0.148219	0.145332	0.145332	0.147738	0.145332	0.143407	0.143407	0.141482	0.14437	0.147257	0.148219	0.14437	0.143407	0.138595
	11	0.149182	0.145332	0.145332	0.146295	0.143888	0.14437	0.145332	0.142445	0.142445	0.143407	0.142445	0.142445	0.147257	0.145332	0.141482	0.139557	0.137632
	12	0.14437	0.142445	0.141482	0.141482	0.142445	0.142445	0.138595	0.14052	0.142445	0.142445	0.142445	0.141482	0.14437	0.143407	0.140038	0.137632	0.13667
	13	0.148219	0.145332	0.142445	0.139557	0.139557	0.138595	0.137151	0.13667	0.141482	0.142445	0.142445	0.142445	0.142445	0.138595	0.13667	0.13667	0.135707
	14		0.147257	0.14437	0.14052	0.14052	0.137632	0.13667	0.135707	0.137632	0.139557	0.139557	0.139557	0.138595	0.135707	0.135707	0.135707
	15			0.142445	0.14052	0.14052	0.14052	0.138595	0.135707	0.135707	0.13667	0.137632	0.13667	0.13667	0.135707	0.135707
	16				0.139557	0.14052	0.14052	0.139557	0.135707	0.134745	0.135707	0.135707	0.135707	0.134745	0.135707
	17					0.138595	0.138595	0.137632	0.134745	0.134745	0.134745	0.135707	0.135707	0.135226
6	1					0.146295	0.145332	0.147257	0.148219	0.149663	0.148219	0.149182	0.148219	0.148219					6																		6
	2					0.147257	0.147257	0.147257	0.147257	0.149663	0.150144	0.147257	0.151107	0.153032	0.152069
	3			0.151107	0.148219	0.150144	0.150144	0.148219	0.147257	0.150626	0.151107	0.149182	0.154475	0.153032	0.152069	0.151107
	4		0.154957	0.152069	0.153032	0.152551	0.151107	0.148219	0.146295	0.152551	0.149182	0.150144	0.154957	0.152069	0.150144	0.150144	0.150144
	5	0.153032	0.153032	0.152069	0.150626	0.149182	0.149182	0.148219	0.147257	0.152069	0.148219	0.149182	0.153032	0.150626	0.145332	0.148219	0.149182	0.147257
	6	0.150144	0.151107	0.150144	0.149182	0.147257	0.147257	0.147257	0.150144	0.150144	0.149182	0.151107	0.151107	0.156882	0.148219	0.143407	0.146295	0.146295
	7	0.149182	0.148219	0.147257	0.146295	0.145332	0.147257	0.150144		0.150144	0.148219	0.151107	0.149182	0.154957	0.153994	0.145332	0.141482	0.145332
	8	0.150144	0.149663	0.148219	0.147257	0.14437	0.147257	0.151107			0.146295	0.149182	0.149182	0.152069	0.156882	0.152069	0.141482	0.139557
	9	0.153994	0.151107	0.147738	0.147257	0.146295	0.148219	0.150144	0.149182	0.145332	0.142445	0.142445	0.149182	0.149182	0.154957	0.151588	0.148219	0.139557
	10	0.150144	0.148219	0.149182	0.148219	0.147257	0.148219	0.148219	0.147257	0.143407	0.143407	0.14052	0.145332	0.149182	0.148219	0.145332	0.143407	0.14052
	11	0.149182	0.146295	0.147257	0.148219	0.147257	0.146295	0.146295	0.142445	0.142445	0.143407	0.141482	0.141482	0.146295	0.145332	0.14437	0.142445	0.139557
	12	0.145332	0.14437	0.14437	0.143407	0.145332	0.145332	0.138595	0.14052	0.142445	0.14437	0.142445	0.141482	0.14437	0.143407	0.141482	0.139076	0.138595
	13	0.148219	0.146295	0.14437	0.141482	0.141482	0.139557	0.13667	0.137632	0.141482	0.14437	0.143407	0.142445	0.142445	0.139557	0.137632	0.138595	0.13667
	14		0.146295	0.142445	0.14052	0.139557	0.139557	0.13667	0.13667	0.14052	0.14052	0.14052	0.138595	0.14052	0.137632	0.137632	0.13667
	15			0.142445	0.139557	0.139557	0.139557	0.139557	0.13667	0.137632	0.137632	0.13667	0.137632	0.13667	0.137632	0.13667
	16				0.14052	0.14052	0.14052	0.14052	0.137632	0.13667	0.13667	0.135707	0.135707	0.135707	0.13667
	17					0.14052	0.139557	0.138595	0.137632	0.135707	0.135707	0.135707	0.135707	0.135707
7	1					0.14437	0.146295	0.146295	0.146295	0.145332	0.146295	0.146295	0.146295	0.147257					7																		7
	2					0.14437	0.147257	0.147257	0.147257	0.148219	0.148219	0.146295	0.145332	0.153032	0.152069
	3			0.146295	0.147257	0.148219	0.150144	0.148219	0.147257	0.149182	0.150144	0.148219	0.149182	0.151107	0.151107	0.150144
	4		0.152069	0.149182	0.150144	0.150144	0.150144	0.148219	0.147257	0.151107	0.148219	0.149182	0.152069	0.150144	0.150144	0.150144	0.149663
	5	0.153032	0.152551	0.149182	0.147257	0.148219	0.148219	0.147257	0.147257	0.150144	0.146295	0.150144	0.151107	0.150144	0.14437	0.145332	0.147257	0.146295
	6	0.151107	0.151107	0.149182	0.146295	0.145332	0.146295	0.147257	0.147257	0.148219	0.147257	0.149182	0.148219	0.153994	0.147257	0.14052	0.143407	0.14437
	7	0.149182	0.147257	0.146295	0.145332	0.142445	0.145332	0.148219		0.147257	0.145332	0.149182	0.148219	0.152069	0.151107	0.145332	0.139557	0.143407
	8	0.149182	0.149182	0.148219	0.145332	0.143407	0.146295	0.150144			0.14437	0.146295	0.147257	0.150144	0.153032	0.150144	0.139557	0.138595
	9	0.152069	0.149182	0.147257	0.146295	0.145332	0.146295	0.150144	0.148219	0.145332	0.141482	0.142445	0.146295	0.147257	0.152069	0.149182	0.147257	0.137632
	10	0.148219	0.145332	0.146295	0.148219	0.14437	0.146295	0.148219	0.146295	0.14437	0.142445	0.14052	0.143407	0.147257	0.148219	0.146295	0.143407	0.138595
	11	0.147738	0.143407	0.143407	0.147257	0.145332	0.146295	0.14437	0.14052	0.142445	0.14437	0.14052	0.141482	0.14437	0.146295	0.14437	0.142445	0.137632
	12	0.143407	0.14052	0.141482	0.142445	0.142445	0.141963	0.138595	0.14052	0.141482	0.14437	0.142445	0.14052	0.142445	0.143407	0.142445	0.137632	0.13667
	13	0.146295	0.143407	0.141482	0.14052	0.139557	0.138595	0.138595	0.137632	0.141482	0.143407	0.142445	0.141482	0.141482	0.139557	0.137632	0.138595	0.135707
	14		0.145332	0.142445	0.14052	0.139557	0.139557	0.138595	0.13667	0.138595	0.139557	0.141482	0.14052	0.138595	0.137632	0.137632	0.135707
	15			0.141482	0.139557	0.139557	0.14052	0.138595	0.13667	0.137632	0.137632	0.137632	0.137632	0.137632	0.13667	0.135707
	16				0.139557	0.139557	0.139557	0.138595	0.13667	0.135707	0.13667	0.13667	0.13667	0.13667	0.13667
	17					0.137632	0.138595	0.13667	0.13667	0.135707	0.135707	0.136189	0.13667	0.136189
8	1					0.145332	0.146295	0.147257	0.146295	0.146295	0.145332	0.147257	0.148219	0.148219					8																		8
	2					0.145332	0.147257	0.147257	0.147257	0.148701	0.150144	0.147257	0.148219	0.153994	0.152069
	3			0.148219	0.147257	0.147257	0.150144	0.149182	0.147257	0.149182	0.153032	0.149182	0.152069	0.151107	0.152551	0.150144
	4		0.151588	0.149182	0.149182	0.151107	0.151107	0.149182	0.148219	0.152069	0.151107	0.149182	0.154957	0.152069	0.149182	0.150144	0.149182
	5	0.152069	0.151107	0.151107	0.149182	0.148219	0.150144	0.149182	0.149182	0.151107	0.149182	0.151107	0.151107	0.151107	0.146295	0.148219	0.149182	0.148219
	6	0.148219	0.151107	0.149182	0.146295	0.146295	0.147738	0.148219	0.149182	0.151107	0.148219	0.150144	0.149182	0.153994	0.149182	0.14052	0.147257	0.147257
	7	0.148219	0.147257	0.147257	0.145332	0.14437	0.147257	0.150144		0.149182	0.148219	0.151107	0.147257	0.152069	0.152069	0.145332	0.139557	0.146295
	8	0.148219	0.149182	0.147257	0.145332	0.14437	0.146295	0.151107			0.145332	0.148219	0.148219	0.151107	0.153994	0.149182	0.14052	0.13667
	9	0.153032	0.151107	0.148219	0.145332	0.145332	0.147257	0.150144	0.149182	0.14437	0.142445	0.14437	0.147257	0.148219	0.150144	0.148219	0.147257	0.13667
	10	0.150144	0.148219	0.148219	0.148219	0.146295	0.147257	0.149182	0.145332	0.142445	0.142445	0.141482	0.14437	0.146295	0.147257	0.143407	0.143407	0.138595
	11	0.148219	0.145332	0.143407	0.147257	0.146295	0.147257	0.14437	0.14052	0.141482	0.143407	0.141482	0.141482	0.14437	0.143407	0.141963	0.14052	0.13667
	12	0.14437	0.142445	0.143407	0.142445	0.143888	0.142445	0.139557	0.139557	0.141482	0.142445	0.142445	0.14052	0.14052	0.141482	0.139557	0.138595	0.135707
	13	0.149182	0.14437	0.143407	0.14052	0.139557	0.139557	0.13667	0.13667	0.14052	0.143407	0.141482	0.139557	0.139557	0.137632	0.13667	0.13667	0.13282
	14		0.146295	0.143407	0.14052	0.14052	0.139557	0.137632	0.13667	0.138595	0.139557	0.139557	0.137632	0.13667	0.135707	0.134745	0.133782
	15			0.142445	0.142445	0.141482	0.141482	0.138595	0.13667	0.137632	0.13667	0.13667	0.135707	0.135707	0.135707	0.134745
	16				0.139557	0.141482	0.141482	0.139557	0.13667	0.134745	0.134745	0.134745	0.134745	0.134745	0.133782
	17					0.139557	0.139557	0.138595	0.135707	0.133782	0.133782	0.133782	0.133782	0.133782
9	1					0.145332	0.145332	0.146295	0.147257	0.148219	0.146295	0.145332	0.148219	0.147257					9																		9
	2					0.14437	0.146295	0.146295	0.148219	0.150144	0.147257	0.146295	0.149182	0.151107	0.153032
	3			0.149182	0.146295	0.146295	0.149182	0.148219	0.146295	0.151107	0.150144	0.148219	0.152069	0.152069	0.151107	0.150144
	4		0.152069	0.150144	0.150144	0.150144	0.149663	0.147257	0.146295	0.152069	0.148219	0.149182	0.154957	0.153032	0.148701	0.151107	0.149182
	5	0.151107	0.151107	0.151107	0.147257	0.146295	0.147257	0.147257	0.147257	0.151107	0.147257	0.149182	0.153032	0.152069	0.147257	0.147257	0.149182	0.148219
	6	0.149182	0.150144	0.149182	0.145813	0.14437	0.14437	0.147257	0.147257	0.149663	0.146776	0.150144	0.149182	0.154957	0.150144	0.142445	0.146295	0.146295
	7	0.148219	0.146295	0.145332	0.14437	0.143888	0.145332	0.148701		0.148219	0.147257	0.149182	0.147257	0.151107	0.151588	0.146295	0.142445	0.145332
	8	0.150144	0.147257	0.147257	0.14437	0.142445	0.145332	0.150144			0.14437	0.146295	0.147257	0.149182	0.155919	0.150144	0.143407	0.139557
	9	0.150144	0.148219	0.146295	0.145332	0.14437	0.146295	0.149182	0.147257	0.14437	0.141482	0.142926	0.146295	0.147257	0.150144	0.150144	0.147257	0.14052
	10	0.148219	0.145332	0.148219	0.146295	0.145332	0.145332	0.148219	0.145332	0.143407	0.141482	0.141482	0.14437	0.147257	0.147257	0.145332	0.146295	0.141482
	11	0.145332	0.143407	0.143888	0.146295	0.145332	0.146295	0.143407	0.141482	0.142445	0.142445	0.141482	0.141482	0.145332	0.143888	0.14437	0.142445	0.14052
	12	0.143407	0.141482	0.142445	0.142445	0.143407	0.143407	0.139557	0.139557	0.142445	0.142445	0.142445	0.141482	0.143407	0.142926	0.14052	0.138595	0.139557
	13	0.147257	0.14437	0.141482	0.14052	0.141482	0.139557	0.137632	0.13667	0.141482	0.141482	0.142445	0.141482	0.142445	0.139557	0.137632	0.137632	0.13667
	14		0.147257	0.143407	0.141482	0.141482	0.139557	0.138595	0.137632	0.137632	0.139557	0.140038	0.139557	0.139557	0.137632	0.13667	0.13667
	15			0.142445	0.141482	0.141482	0.14052	0.138595	0.137632	0.137632	0.137632	0.13667	0.13667	0.136189	0.137632	0.13667
	16				0.139557	0.139557	0.14052	0.138595	0.13667	0.135707	0.135707	0.135707	0.134745	0.133782	0.136189
	17					0.138595	0.138595	0.13667	0.135707	0.134745	0.133782	0.134745	0.133782	0.133782
10	1					0.14437	0.146295	0.145332	0.146295	0.147257	0.146295	0.146295	0.147257	0.148219					10																		10
	2					0.14437	0.147257	0.147257	0.147257	0.147257	0.146295	0.146295	0.149182	0.154957	0.152069
	3			0.148219	0.145332	0.148219	0.149182	0.147738	0.147257	0.151107	0.150144	0.148219	0.150144	0.154475	0.152069	0.149182
	4		0.150144	0.149182	0.149182	0.149182	0.149182	0.148219	0.148219	0.152069	0.148219	0.149182	0.157844	0.153032	0.149182	0.151107	0.149182
	5	0.151107	0.149182	0.149663	0.146295	0.147257	0.148219	0.148219	0.148219	0.149182	0.147257	0.148219	0.151107	0.152069	0.146295	0.147257	0.149182	0.148219
	6	0.147257	0.151107	0.148219	0.145332	0.14437	0.146295	0.148219	0.148219	0.149182	0.148219	0.149182	0.150144	0.156882	0.149182	0.141482	0.14437	0.147257
	7	0.147257	0.14437	0.14437	0.143407	0.143407	0.145332	0.149182		0.147257	0.146295	0.149182	0.148219	0.153032	0.152069	0.146295	0.138595	0.143407
	8	0.147257	0.147257	0.145332	0.143407	0.142445	0.147257	0.148219			0.145332	0.147257	0.148219	0.152069	0.153994	0.152069	0.141482	0.13667
	9	0.150144	0.149182	0.145332	0.14437	0.143407	0.147257	0.148219	0.146295	0.142445	0.141482	0.142445	0.148219	0.149182	0.151107	0.151107	0.149182	0.137632
	10	0.149182	0.147257	0.147257	0.146295	0.143407	0.145332	0.147257	0.143407	0.141482	0.141482	0.140038	0.14437	0.149182	0.149182	0.146295	0.14437	0.138595
	11	0.147257	0.14437	0.14437	0.14437	0.143888	0.143407	0.142445	0.139557	0.14052	0.14052	0.139557	0.141482	0.146295	0.145332	0.143407	0.142445	0.138595
	12	0.14437	0.141482	0.141482	0.141482	0.142926	0.14052	0.13667	0.137632	0.14052	0.141482	0.14052	0.14052	0.14437	0.142445	0.141482	0.139557	0.13667
	13	0.148219	0.14437	0.14052	0.14052	0.139557	0.138595	0.13667	0.135707	0.138595	0.14052	0.139557	0.14052	0.143407	0.14052	0.137632	0.137632	0.133782
	14		0.147257	0.143407	0.14052	0.140038	0.137632	0.13667	0.134745	0.13667	0.137632	0.137632	0.138595	0.138595	0.137632	0.135707	0.134745
	15			0.143407	0.14052	0.14052	0.14052	0.13667	0.135707	0.135707	0.135707	0.135707	0.134745	0.13667	0.135707	0.135707
	16				0.14052	0.141482	0.14052	0.139557	0.135707	0.133782	0.133782	0.134745	0.134264	0.134745	0.133782
	17					0.14052	0.138595	0.13667	0.133782	0.133782	0.133782	0.133782	0.133782	0.133782

## Sheet: DISS
MaxDissociation
Signals of insufficient quality were excluded from the property maps. Signals could be rejected based on noise low amplitude, large artefact or ventricluar farfields that could not be substracted.
		1	2	3	4	5	6	7	8	9	10	11	12	13	14	15	16	17
1	1					18.5145	23.8091	25.3205	30.9753	29.6222	25.8741	28.621	29.8606	29.2763					1																		1
	2					27.3684	29.6919	32.0611	34.6609	35.3582	32.255	35.2064	38.0616	39.5672	36.935
	3			23.7309	26.5947	29.6235	32.5122	29.7866	33.9436	37.1479	35.9404	39.1103	41.6093	41.2718	34.8279	28.4938
	4		31.9275	32.3218	33.9876	34.401	31.7797	26.3772	33.3185	38.7143	37.2721	38.5086	41.9018	40.1679	35.4177	28.42	19.505
	5	30.2825	37.3325	38.5373	33.6379	33.3612	29.7291	23.6194	33.2432	38.2506	35.5564	34.5556	38.2675	39.092	38.3195	33.4073	24.316	14.6536
	6	30.1022	38.0222	38.2525	33.6634	29.869	27.4545	21.0471	32.505	35.4116	34.399	33.3759	34.9777	39.5381	39.4265	35.1726	27.3874	20.4171
	7	25.2456	33.9091	36.1439	31.6715	28.5598	30.8599	24.6841		31.9507	31.828	33.9852	33.8889	38.2825	41.803	37.8623	30.8735	23.4539
	8	23.7719	29.6241	30.9064	28.5598	30.019	30.7311	27.4577			28.9855	32.1776	31.1872	35.5087	41.1754	39.7371	34.3685	23.3411
	9	23.3759	28.4668	30.5037	30.9161	30.5416	30.7715	30.2469	30.7286	29.2289	26.7292	28.7464	31.1238	33.755	38.2754	38.6287	34.5561	22.0254
	10	24.6228	30.7592	33.5825	36.6217	32.7938	31.2646	30.0951	29.9712	29.274	25.3919	25.128	27.2404	32.9191	32.7475	33.5242	33.9476	23.9814
	11	26.8276	31.8744	32.5322	35.4903	34.2892	32.4809	28.0433	25.3428	24.1514	24.5348	22.2146	25.2874	30.1446	29.5385	28.7915	28.73	21.9954
	12	31.2368	34.2424	29.5867	32.012	31.7923	28.5707	24.5853	21.0523	25.7081	27.1571	23	23.0024	26.2512	26.8427	25.0094	23.7616	17.7472
	13	29.6867	32.5553	30.5274	29.9695	28.8463	26.827	22.914	22.8415	26.6141	29.7324	26.5745	23.723	23.5201	23.5864	19.9632	17.3684	14.8559
	14		27.9609	27.4019	27.92	24.1596	24.7977	23.076	21.0605	23.6674	27.4074	26.0349	22.2517	20.5128	20.2253	15.2449	13.7081
	15			22.4929	22.8314	24.0256	24.904	23.8628	22.1236	20.714	21.9243	20.5835	17.1393	16.0934	15.1396	12.6032
	16				20.345	23.1346	25.2028	24.6628	21.6575	18.5409	17.7353	16.0656	13.1765	12.1109	12.0545
	17					18.5471	19.0231	19.7671	17.3379	13.6599	12.6968	11.9021	9.95711	8.68326
2	1					19.3667	23.0166	23.1061	26.6024	26.6523	24.6523	26.0167	26.8807	27.9688					2																		2
	2					25.8409	29.1217	29.6778	31.1836	34.5375	30.8337	32.3708	35.7232	35.609	34.5801
	3			23.0621	25.6698	28.6897	30.8237	27.6313	31.9736	35.4455	32.5411	34.5274	38.346	37.835	34.4493	27.9413
	4		28.3702	31.6618	31.3957	32.9952	31.4565	25.2795	31.8277	36.128	31.6818	34.4221	39.4504	38.9539	34.5108	29.0485	22.1971
	5	26.665	33.2542	36.25	32.5478	31.6881	30.7232	24.7067	31.0505	34.4286	28.2273	30.7191	38.0389	37.8452	37.5385	33.3933	25.8702	17.4482
	6	26.4015	35.2843	37.4471	32.7452	28.9577	28.8241	24.1135	30.8675	30.6024	28.4676	29.2778	33.6683	37.3907	36.6265	33.29	26.846	19.5772
	7	23.2878	31.2163	35.6468	32.2482	29.7612	30.9262	26.3034		29.0931	28.4163	29.6044	31.9002	35.7494	38.4806	36.3405	28.9954	20.5691
	8	22.1217	29.365	30.1758	31.2401	30.9236	33.2119	29.691			27.6333	29.1981	28.8902	33.5913	39.5512	37.5312	31.1475	21.2257
	9	22.2574	30.2809	32.1619	34.472	33.4403	33.3539	33.1937	29.3062	26.4575	25.0766	26.8703	28.2115	30.6427	36.3293	36.2105	31.9551	22.2032
	10	26.0993	32.9474	34.8067	37.4738	35.1526	34.8024	33.2357	29.6005	26.5644	21.8953	25.1547	26.09	29.9429	30.5851	31.4976	30.8361	23.0849
	11	27.2751	32.8571	33.7123	36.8294	35.4812	33.9694	30.3075	26.1608	23.1814	20.993	21.2778	23.4079	28.4479	28.0957	27.5529	26.1856	20.0747
	12	28.7654	32.9907	30.1596	31.96	32.3694	29.1067	26.8105	22.2442	21.522	22.5455	20.7605	23.8069	27.822	26.1472	24.1968	23.805	18.1445
	13	28.2386	31.2471	30.6121	29.4988	28.7448	26.5799	22.2022	20.5909	24.6046	26.8794	25.7912	24.9609	25.4527	23.2989	20.578	18.3326	14.8552
	14		27.4762	27.5258	25.6713	25.1353	24.8822	21.7725	20.4219	22.5598	25.9634	27.0618	24.4591	23.7477	20.8998	16.639	14.6756
	15			22.7512	23.0872	23.9291	25.3379	24.7381	20.5654	18.8933	20.4388	21.0946	20.3288	18.0337	15.7127	13.6696
	16				22.0228	23.4645	26.2952	25.6312	20.3747	17.365	18.1106	18.3836	15.92	12.9844	12.2215
	17					19.4055	21.1258	19.8969	16.1916	13.2272	13.3496	14.5055	12.1347	9.78097
3	1					16.3381	21.7578	23.5513	26.1124	26.932	26.318	27.9515	30.3463	30.6106					3																		3
	2					24.3014	30.6675	30.5012	31.4337	33.3839	30.4423	33.3552	37.1805	38.5577	35.3415
	3			23.7694	26.3187	30.5206	33.0341	29.8407	33.0966	35.3077	34.0298	35.1024	38.848	40.0025	33.8966	28.6137
	4		29.8734	35.3455	36.1695	36.3571	34.8812	27.2948	33.401	36.7376	34.1872	35.7748	39.1454	37.8642	34.4205	28.9169	21.2847
	5	24.98	33.4218	39.2157	37.4927	35.1936	31.6112	24.802	32.0341	35.7843	31.9287	34.6765	37.6304	36.5753	38.1913	32.3861	26.1144	17.8714
	6	25.0525	35.9901	39.3259	36.2833	33.639	29.8184	23.5086	33.577	34.6034	31.6961	33.33	33.5718	37.2286	34.4926	31.1584	25.8201	20.2681
	7	25.3128	32.8691	37.6333	32.8015	33.5616	31.7805	25.2892		31.8829	31.4334	34.3704	33.1028	34.5899	36.698	32.715	28.5907	22.3532
	8	26.2289	32.7333	31.3956	28.1244	32.3885	32.6973	27.7322			30.3159	33.6699	31.175	32.6416	36.4268	34.4814	30.7099	23.5793
	9	26.1375	33.1355	33.8808	31.4916	31.3765	30.5669	30.6765	31.3912	27.8262	24.8568	30.5991	31.7098	31.3875	34.592	34.204	31.5908	22.8368
	10	25.6194	33.637	35.6404	36.0169	34.5923	33.4556	32.511	30.653	27.6295	21.6321	26	28.6675	30.0978	31.0655	31.3309	30.6115	22.9722
	11	26.399	30.7178	32.0949	34.837	33.3835	33.3486	30.5694	28.3216	23.156	20.5934	21.6854	25.281	27.9782	27.0652	26.9881	26.1348	20.7991
	12	28.0436	30.9141	28.4293	29.2959	28.6611	28.7815	25.9885	22.373	21.9368	22.2813	21.2441	24.2331	26.7679	25.7512	23.3765	22.1744	17.0576
	13	24.3753	27.2812	26.059	25.5802	24.9766	25.5847	22.9201	21.3433	23.0746	25.3286	25.8665	25.3855	24.4634	22.9695	19.4395	17.023	14.2676
	14		24.5673	24.6682	22.5361	20.5884	21.1023	20.1376	20.35	20.4977	24.1686	24.3857	22.9122	21.2233	19.6074	15.2523	12.3189
	15			20.441	20.3721	20.1585	20.8112	20.1065	17.95	16.1438	17.844	19.1144	16.8993	15.4665	14.1494	11.9954
	16				18.7395	19.9326	22.1565	21.7355	18.8307	15.0293	15.2077	15.0928	13.5986	12.1487	12.0618
	17					15.6791	17.6204	18.1995	15.8937	12.0991	11.1281	11.4086	10.127	9.03604
4	1					17.5346	22.693	21.1055	24.9078	25.854	23.5634	25.657	26.2469	29.9458					4																		4
	2					25.6388	27.6594	26.8208	28.6383	30.3985	29.8744	34.0316	35.3243	37.6833	37.8463
	3			22.2488	26.2	27.5617	28.4629	25.4901	28.9029	31.0393	31.0693	35.059	38.8698	40.6675	36.7104	27.6386
	4		29.3873	31.8252	30.1232	30.0272	27.7965	22.8892	29.3448	31.7054	31.8729	35.4975	39.3342	40.8433	36.4866	29.0099	19.2642
	5	25.1114	32.6683	35.849	31.9042	30.1843	27.1076	22.9531	28.6108	30.7728	28.9683	32.6872	37.3176	40.8533	40.1349	33.1845	25.661	15.1341
	6	25.0645	33.3706	36.0911	32.9413	30.6204	27.8191	23.1818	29.027	29.9263	28.3956	29.3416	33.4332	38.797	40.3005	34.0995	26.253	19.9805
	7	25.7143	33.1176	34.9294	31.3528	29.4928	29.8184	25.5842		27.0976	27.0439	29.4015	30.4655	34.7463	40.3448	39.133	31.4219	22.7837
	8	25.4254	30.637	30.766	27.8683	29.1034	31.4615	28.2444			25.558	27.8949	28.6201	32.6543	38.1975	39.1488	35.6565	24.2752
	9	25.1262	31.4059	32.4501	31.6927	28.9638	29.2579	28.6167	27.22	24.9017	23.7612	27.3262	28.6748	30.8971	36.727	37.9127	35.5132	24.2465
	10	26.4554	33.4372	35.3711	36.8166	33.2488	32.2034	30.1446	28.3687	26.0721	22.6974	25.1972	25.9275	30.8341	31.8	34.7362	34.0913	25.0953
	11	26.1244	31.5714	33.5598	37.1646	35.4331	32.0845	29.7518	25.7133	22.2363	21.7119	21.48	23.8981	28.9322	29.4602	29.5452	28.4509	21.9817
	12	29.7264	32.0143	30.5211	31.1823	31.6845	29.0778	25.6097	22.2051	22.0758	23.119	22.5603	23.0682	28.3539	28.3507	27.338	25.8838	19.9369
	13	26.8603	30.861	28.8235	27.0257	26.8148	25.455	20.3287	19.9266	23.7459	26.5414	26.2145	24.7582	26.3185	25.3218	23.5113	19.7828	14.627
	14		27.8985	27.2168	23.3649	22.0577	23.125	21.1501	21.0729	22.6789	25.0716	25.3704	23.2258	22.0667	19.7614	15.9206	14.2924
	15			23.0488	21.3048	22.5394	22.9057	23.9355	20.6446	18.656	19.2785	18.9908	18.5636	16.9955	14.7585	11.7365
	16				19.305	21.7558	23.9931	23.8704	21.0703	17.6341	16.6824	16.2027	13.2619	12.1757	10.9571
	17					17.2207	19.0161	19.2661	16.3586	13.6592	12.0291	11.464	10.3879	8.33107
5	1					18.3619	23.6643	24.3735	27.5024	26.9111	24.189	26.729	29.2306	27.9138					5																		5
	2					26.5752	30.8812	31.8921	32.8149	33.7286	30.2319	32.6014	37.4627	37.6968	34.2998
	3			23.1345	25.6973	30.3768	31.4272	29.0676	33.0651	33.944	31.5714	33.4578	37.9807	39.3594	33.4828	26.7217
	4		30.6321	34.4286	35.0469	37.6931	34	26.4404	30.1117	33.6788	30.017	33.8961	38.4926	38.0516	33.1418	27.9608	20.8995
	5	27.9218	36.5872	39.4132	38.3596	36.949	32.0368	23.7775	30.8117	33.8039	28.9831	31.8426	35.8025	38.2525	38.488	32.7951	26.878	17.8544
	6	27.7611	37.0049	39.2916	36.613	33.048	29.0856	21.9951	32.6039	31.9223	29.7222	30.2854	33.6756	38.5961	37.8969	34.7874	27.5835	22.4048
	7	23.5821	33.3951	36.3502	34.533	30.988	31.8961	25.8655		29.2561	28.3406	30.8019	31.5545	36.6486	40.4268	37.7746	30.5889	24.1124
	8	26.7335	33.0196	33.7913	29.2742	30.9835	31.0625	28.3128			25.8241	30.6135	29.6522	34.2647	40.5174	38.6193	32.7908	23.1591
	9	26.4384	32.098	33.6981	32.177	30.7112	31.1095	30.4817	29.6024	26.7102	23.3546	27.1943	29.138	31.784	38.2963	39.0799	34.6785	22.483
	10	24.6198	31.799	34.0799	36.215	34.8884	31.1933	30.2433	28.358	26.6318	21.7654	23.3175	25.5227	30.3937	32.7633	33.7167	31.974	24.0115
	11	27.7926	32.23	33.2387	36.1718	35.0494	31.8124	28.2138	25.3553	22.1584	20.0355	19.9102	23.1647	27.9495	29.5346	29.4693	28.7605	21.9218
	12	32.7343	35.0545	31.1379	30.5349	30.0305	26.9789	24.4838	21.6589	21.2324	22.4151	20.4612	21.9136	27.2185	27.9437	26.1663	24.3744	18.8934
	13	29.335	31.8961	30.8487	26.6233	25.8568	24.3695	21.6508	21.0523	23.5651	25.0141	24.0724	23.6355	25.6495	24.9794	21.7851	18.0903	13.9238
	14		28.9542	29.6156	24.8419	22.3163	22.6399	21.1239	20.4899	21.4128	23.5783	23.8079	22.0922	21.159	18.7878	14.5068	12.787
	15			25.2512	22.9182	21.463	22.3456	22.2483	19.1775	17.6704	19.4263	19.8345	18.4595	16.6652	14.4144	11.8382
	16				20.0607	21.0463	22.1293	22.4069	18.7489	15.9529	16.5498	15.8787	14.1007	12.4321	11.3206
	17					16.069	17.3227	17.8696	16.5596	13.2803	12.2477	12.5878	10.8094	8.74273
6	1					18.8585	23.3519	23.3956	27.799	25.0794	24.3366	26.9677	29.2797	28.0963					6																		6
	2					26.4363	29.6195	28.5572	30.1007	31.1155	30.6478	32.8564	37.4367	36.8611	36.4975
	3			20.9876	24.2296	28.3457	30.9204	27.5648	31.047	32.7284	32.1098	35.3756	39.0327	39.0475	33.8139	28.0025
	4		31.1646	31.3075	29.0957	31.5037	30.4286	26.312	30.8484	34.581	32.7024	35.602	40.3249	39.9075	35.6495	28.9703	19.9726
	5	30.0481	35.2281	36.2746	32.2146	30.2388	28.28	25.0965	30.7457	34.505	30.9126	31.6691	37.9648	39.7704	37.7108	31.4216	24.1253	15.6005
	6	30.495	37.3475	37.9305	32.0393	29.683	27.49	23.8663	33.7506	31.8088	30.2976	30.2247	33.8744	39.8586	40.4867	33.1405	26.1332	19.8317
	7	25.861	33.1453	35.1418	29.4523	28.9952	30.4054	26.86		28.6593	29.1244	31.804	31.6099	36.643	40.655	35.9021	28.7671	22.5622
	8	24.2556	30.4	28.3276	26.5805	29.2228	30.199	27.1642			28.6968	32.2927	32.4212	34.4637	39.8354	38.7327	30.7972	21.8052
	9	24.2821	30.8883	29.0608	28.3594	27.2255	27.1843	28.194	28.3842	26.9758	26.1611	30.1082	32.6789	33.7543	37.0177	38.2105	32.9366	21.5734
	10	26.3775	32.9455	33.7266	33.5403	31.2122	30.0268	29.6235	28.7512	26.851	22.9641	26.7129	28.9038	33.231	33.6259	32.5409	30.5072	22.8865
	11	27.0399	31.8264	32.6152	35.223	33.5317	31.3366	28.6072	25.6364	23.2024	22.0552	21.8703	25.8165	31.2136	29.8317	26.4893	27.1185	19.5664
	12	28.576	31.7488	29.4743	32.0697	32.1408	30.1335	24.9294	21.4171	23.0505	25.137	22.8812	25.5024	28.7644	27.5249	23.822	24.0882	18.1166
	13	25.4912	28.436	28.2623	27.6405	28.1551	27.2037	23.4896	21.4848	25.6548	27.7651	26.8458	26.1244	26.9236	22.951	20.3441	18.6644	14.529
	14		24.8164	26.5157	26.1513	25.9953	26.8842	23.9369	22.3014	23.2043	26.4764	26.0974	24.6163	22.2854	19.4573	14.5138	14.1435
	15			22.4846	23.3709	24.8928	25.7324	25.4533	22.4056	19.8237	21.0486	21.0648	19.4954	16.5183	14.3088	12.576
	16				20.3873	22.3598	24.5118	25.4009	22.8318	19.646	20.1233	18.2883	15.9862	13.4414	12.0968
	17					17.5082	18.8671	20.8608	18.7037	15.6166	14.3899	13.9954	12.0603	9.88046
7	1					17.136	22.9257	22.6388	26.0144	25.7596	26.4614	26.494	30.6553	29.5791					7																		7
	2					27.9833	31.2019	27.937	30.9082	31.6092	31.8325	33.43	38.6044	40.975	38.3441
	3			24.812	27.4169	30.1546	29.7518	27.3729	30.0529	33.8547	34.0918	36.9782	39.7293	40.1343	37.1695	30.7164
	4		28.6439	31.4393	31.8024	32.615	29.7286	25.5012	31.3034	37.0535	35.3478	37.1125	40.9704	40.4122	38.6846	31.5303	22.5572
	5	24.8099	31.6988	35.3171	32.1663	30.7306	29.1589	25.7233	32.3366	38.4383	32.9613	32.9073	37.9851	39.0686	40.6038	37.1029	27.6826	18.1223
	6	26.745	35.0813	35.5243	33.3619	28.8916	29.7668	25.75	36.284	37.7205	32.845	31.4272	34.8049	37.9801	39.0316	35.8033	30.1344	22.2847
	7	24.5	32.0655	33.6058	31.89	30.0853	32.9091	29.284		33.5398	29.6643	30.9587	33.9585	34.172	38.8802	38.4843	32.1512	24.2453
	8	23.3824	29.3456	29.6448	29.3652	30.5887	31.2033	31.9976			27.8409	29.6226	30.1162	32.398	37.4005	39.5074	33.9789	24.2483
	9	24.0348	29.6806	30.2494	31.0387	29.6316	30.8971	31.9392	30.6329	25.3565	23.0259	26.7146	29.894	30.983	36.3012	38.6708	35.012	23.5011
	10	24.8411	30.8714	33.1449	36.5932	33.4347	33.1079	34.2254	29.4153	25.9619	21.9102	24.356	26.2766	29.9903	30.8374	31.5646	32.0475	25.2807
	11	26.2542	30.6825	32.8525	36.7613	35.4869	32.658	31.7553	27.3794	23.3853	22.5036	22.6434	23.6988	28.6998	28.1727	27.2571	27.6132	22.6888
	12	29.0789	31.2084	30.0141	30.8357	30.158	27.8478	25.9397	22.3995	23.2094	24.4929	22.9953	23.2984	27.7827	26.131	24.4442	25.0736	20.7982
	13	26.3656	28.4421	28.2729	25.8654	26.3155	24.4734	22.1339	21.1172	24.0583	26.5778	26.4541	25.1818	25.1831	23.5893	21.1445	20.3037	16.7002
	14		25.3837	25.6643	23.8399	23.4539	22.42	21.0619	20.1364	21.9701	25.8115	25.9277	24.8157	22.1763	19.8975	16.4635	16.0919
	15			22.72	22.4157	23.5622	23.4908	21.3936	18.8227	17.6576	20.1451	20.9144	18.8643	18.1549	15.6864	13.8869
	16				20.8364	22.8863	24.7067	22.4713	19.4412	16.6764	16.6532	18.1348	14.8095	14.6825	13.8503
	17					17.3807	18.6161	17.8727	15.3093	12.5011	12.2647	13.6961	12.0342	12.3628
8	1					17.9739	22.319	22.5913	25.7899	26.1904	25.2411	25.9201	29.2573	30.2822					8																		8
	2					25.5952	29.4771	28.1587	29.5327	30.5401	30.6088	32.8499	37.322	38.8515	37.4851
	3			20.6755	25.5718	30.4426	30.861	26.9534	30.5301	31.2068	31.7728	34.7311	38.8747	37.5711	35.3531	28.7005
	4		25.5799	28.0758	28.5956	33.1907	29.7685	24.0099	30.8655	32.8477	32.0961	34.6201	39.7877	37.9631	34.1108	30.1671	20.6953
	5	24.1333	30.1225	31.7488	30.5623	31.2421	26.6741	21.4668	28.6576	31.5577	27.0662	32.5665	37.1807	37.5345	38.483	33.8224	26.375	16.09
	6	24.8578	32.1106	33.8589	31.0889	28.8935	26.7101	21.6953	31.3775	31.2752	28.6034	29.7506	33.6912	38.1621	37.4387	34.5153	28.908	22.2233
	7	24.2341	30.6439	31.7319	29.226	29.0808	29.7032	25.3481		28.7143	28.09	31.2074	31.8951	34.5062	38.958	37.3245	31.8685	25.149
	8	24.2707	30.6642	28.7718	28.2823	28.2109	29.012	25.6404			28.5986	31.4479	31.0024	33.1535	37.6328	39.7647	34.8568	25.9169
	9	23.605	29.9064	30.3471	31.9761	28.0167	28.7451	26.6716	26.3317	25.4452	24.6108	30.4123	31.0625	31.7883	35.2328	38.4442	35.5666	24.4621
	10	25.7575	31.7916	33.7115	36.294	32.446	30.5353	28.8873	27.872	24.8884	21.8871	25.9744	27.919	31.0938	31.6778	34.8538	34.4988	25.4861
	11	26.9035	31.5205	32.8005	35.5422	34.2902	32.7266	29.8203	26.8923	21.4646	21.0282	21.8803	27.3106	30.3517	29.7618	29.6294	29.6543	21.9472
	12	29.6171	32.0831	29.6619	29.4259	31.1862	29.5976	26.2153	23.4942	23.2911	24.7005	23.7817	26.4023	30.2338	29.641	27.1055	26.9589	19.7778
	13	27.278	29.8502	28.6303	26.8525	26.9256	26.776	23.2936	24.2161	26.1137	28.7676	27.4836	26.159	27.8479	26.2721	22.93	20.8804	16.34
	14		27.0624	27.7962	25.9485	25.7366	25.4478	25.4737	22.9476	25.3103	26.984	27.9016	25.8428	24.0608	21.474	16.9933	15.4629
	15			22.8337	22.6745	25.1166	26.3692	27.2569	23.625	20.6347	22.6393	21.8311	19.7422	19.4621	17.074	13.038
	16				19.8848	21.8759	25.4333	26.9606	23.4072	19.8742	19.0603	17.8597	16.1228	16.0846	13.6503
	17					17.0391	19.9611	21.6575	17.9484	14.1222	12.2806	13.4733	12.6882	11.1269
9	1					18.0459	23.9137	25.5725	26.7932	26.5222	26.4015	28.1332	29.5718	29.7628					9																		9
	2					26.2267	28.8095	30.2411	30.9928	33.625	32.1623	34.5084	38.9877	39.9455	37.3905
	3			22.8571	28.2816	28.5012	29.8252	28.3544	30.7295	34.3554	33.9683	37.2361	41.8	41.2745	34.422	27.7488
	4		28.8108	33.615	33.944	34.1341	31.4719	25.4696	33.1908	37.5455	34.0461	35.6773	40.555	39.8753	33.5572	27.9238	18.6284
	5	27.3145	32.2868	35.7224	33.3051	34.094	31.57	26.6683	33.4479	37.0172	31.8617	32.0954	37.6129	37.8452	37.657	31.8478	24.6049	15.2985
	6	26.6118	34.4355	36.6626	32.3212	30.8241	30.3525	24.9446	33.988	35.8814	30.7036	30.0611	33.1523	36.9027	36.6084	32.9835	27.8265	20.6675
	7	23.1333	31.6019	33.7976	29.6167	27.9666	30.7271	26.8606		30.2802	30.2428	31.4369	32.1244	32.6584	37.037	35.1768	29.8897	23.5418
	8	24.2732	29.8435	29.8512	24.8971	27.0431	29.1106	27.1078			27.4071	30.4048	29.6562	29.3284	36.3778	36.0344	32.6627	22.8707
	9	24.804	30.8424	30.4203	27.3046	26.0265	27.4818	28.3692	27.1807	22.8626	22.2235	25.84	27.6241	29.5655	35.0073	36.3107	33.959	23.0047
	10	23.7475	32.2349	32.7464	31.8961	29.4112	29.477	29.8164	27.2048	23.3806	19.6745	24.0047	26.4976	30.6289	30.8125	32.554	33.7512	25.6108
	11	24.1768	29.024	30.5707	32.7238	32.0096	30.9517	28.5506	23.6165	19.5745	19.1616	19.8712	25.0491	28.8786	28.81	29.2755	29.3019	24.5465
	12	28.8873	31.5	27.9644	28.3294	29.4964	27.3341	23.6705	19.8462	21.9577	21.6132	20.5188	23.9674	28.7294	28.719	26.0536	25.5959	21.2166
	13	26.5381	30.6957	28.7707	26.5812	26.5023	24.4512	22.0991	20.1954	24.3138	26.1244	25.2914	23.8275	27.9368	26.03	24.0588	21.6598	17.7717
	14		26.5558	27.1148	26.1372	24.4988	24.0534	22.0922	20.8851	23.1697	25.6651	25.4966	24.5161	26.1762	24.605	19.3798	16.6591
	15			23.6469	25.0723	24.7309	25.4571	25.7034	22.3578	20.8253	22.8352	23.3063	20.4424	20.5303	19.5588	15.4095
	16				22.6195	24.477	25.8558	28.5423	25.0271	21.4921	21.4327	21.1681	17.8958	16.6452	15.781
	17					18.7248	21.039	22.6606	20.4	16.596	15.8886	15.8914	14.64	12.3951
10	1					16.0738	21.413	21.862	24.6852	25.5121	24.9564	26.024	28.5648	28.973					10																		10
	2					24.0262	28.8889	27.7644	28.2317	30.3341	30.8856	33.5483	36.5243	37.4675	36.3704
	3			20.4757	23.5827	27.5507	28.034	25.6804	28.8491	32.9804	33.1634	36.8358	38.0665	38.5237	34.6766	27.7704
	4		28.8273	28.599	28.2457	29.7403	26.8093	22.0221	29.7555	34.7966	34.6201	38.4599	38.1737	37.4514	34.6479	30.9801	22.3506
	5	26.8498	32.3131	34.8832	31.1961	28.0243	25.4841	21.3194	29.9779	33.445	30.6244	34.0894	36.6824	37.1778	39.5666	35.6932	28.9289	19.2574
	6	25.6919	33.9609	36.3374	31.253	27.9903	24.5791	21.3897	31.1667	32.1578	31.9513	32.176	32.8579	38.7053	38.4307	36.236	30.9311	25.4793
	7	23.5098	30.012	33.2888	30.4714	27.9052	27.8662	22.1268		28.8862	30.9566	32.665	32.7345	34.3484	39.6034	38.5714	34.1149	26.2689
	8	24.0244	28.843	28.7494	26.0238	27.3765	28.9781	25.2039			28.3325	31.1259	30.9902	30.6432	37.2624	39.8391	35.5958	25.9201
	9	23.8582	30.3285	29.6635	28.3508	27.9291	28.113	28.1241	27.7597	24.6342	23.4387	29.2375	31.4559	30.0371	33.6757	38.9703	37.9976	26.9245
	10	25.2328	32.1125	32.6521	32.8932	31.5957	31.3357	30.7609	29.0952	25.721	21.8463	27.1194	30.8245	31.0248	30.4461	34.6587	36.7619	28.2424
	11	26.7309	30.9424	31.7242	34.3967	33.0238	32.435	29.6215	26.2674	23.6009	22.2435	24.8178	28.7441	30.5534	29.3478	29.9313	31.8918	25.8958
	12	29.8053	32.2703	28.7676	29.6344	30.9078	30.0162	26.1686	21.9197	23.9155	26.0864	26.0397	28.7698	30.4619	29.9458	28.2354	28.7372	23.0995
	13	29.4078	31.0964	30.2587	27.3023	27.5576	26.4032	21.1982	20.1973	24.6313	29.7605	29.736	29.4421	29.3075	26.9114	25.3041	22.4506	17.8826
	14		26.9903	27.9953	26.2599	24.2297	24.8966	23.9112	22.3176	23.961	26.7898	29.7352	28.931	26.9516	25.1839	19.4525	17.6425
	15			23.781	23.514	24.7692	25.9074	26.5149	25.2624	23.8652	25.2892	25.5157	21.9118	22.2118	20.4231	16.5045
	16				22.4107	24.058	27.1889	27.206	24.714	22.1951	21.4655	21.7684	19.1879	18.4018	16.8571
	17					19.6028	21.6152	22.3531	19.5267	15.6756	15.7691	15.6801	14.096	13.1283

## Sheet: BT
NumberOfStartingPointsBT
Signals of insufficient quality were excluded from the property maps. Signals could be rejected based on noise low amplitude, large artefact or ventricluar farfields that could not be substracted. Breaktrough can only be identified if a contiguous circle of electrodes enclose the electrode of interest. Therefore electrodes at the border or around a missing electrodes are excluded.
	1	1	2	3	4	5	6	7	8	9	10	11	12	13	14	15	16	17
1	2																		1																		1
	3						17	5	10	11	10	16	17
	4						9	9	30	20	4	15	10	8
	5				8	10	6	22	7	16	10	16	10	16	5
	6			14	20	13	11	40	12	36	35	16	27	40	18	10
	7		10	24	32	12	10				28	15	27	22	14	9	13
	8		52	31	31	43	41				20	23	14	7	15	17	13
	9		16	14	12	37	38				10	18	7	17	33	26	21
	10		18	11	34	18	12				15	14	9	9	19	13	18
	11		31	13	12	13	15	24	18	26	19	27	32	22	25	14	11
	12		30	23	15	10	12	6	10	8	17	34	21	13	10	25	18
	13		14	9	13	22	8	11	15	10	8	5	12	7	11	10	12
	14			17	39	22	3	10	12	5	3	7	5	3	7	16
	15				15	6	10	10	16	17	11	8	5	8	11
	16					10	5	10	9	13	7	14	15	3
	17						6	6	15	15	3	5	4
	1
2	2																		2																		2
	3						15	9	13	6	5	13	18
	4						10	10	37	12	11	13	11	7
	5				17	11	11	21	9	14	7	14	14	22	13
	6			9	16	18	10	49	11	38	30	10	20	34	13	8
	7		14	35	20	13	7				12	22	13	16	23	10	10
	8		53	34	28	60	44				28	23	9	11	20	15	14
	9		10	23	24	35	37				8	18	6	13	24	28	12
	10		23	25	46	16	12				16	18	7	13	18	16	12
	11		15	21	18	13	19	20	23	13	17	21	23	16	24	8	13
	12		28	24	14	13	10	10	9	7	13	30	29	10	14	23	32
	13		11	12	16	7	14	22	28	13	9	16	32	7	14	6	8
	14			27	37	17	4	11	11	5	7	8	18	9	19	17
	15				11	6	7	10	15	6	6	13	13	3	12
	16					10	3	12	29	4	9	31	22	5
	17						1	4	25	18	2	6	7
	1
3	2																		3																		3
	3						14	13	11	8	21	17	14
	4						9	19	38	13	8	15	16	10
	5				9	11	9	27	5	14	10	18	10	7	9
	6			15	17	25	18	51	11	37	32	12	18	32	14	15
	7		8	26	14	8	7				17	15	15	12	32	15	16
	8		55	30	20	61	30				24	27	9	12	10	14	13
	9		13	14	19	39	36				10	24	14	13	31	20	15
	10		15	11	33	15	8				18	18	16	13	10	15	11
	11		29	22	10	13	16	24	17	20	18	19	32	19	23	18	18
	12		36	19	11	11	11	8	14	9	10	26	23	19	11	19	23
	13		12	16	7	12	6	17	22	7	12	11	18	6	21	6	15
	14			19	24	13	3	11	6	8	7	7	10	7	16	16
	15				13	7	5	8	17	7	10	9	7	7	5
	16					6	6	6	13	6	4	21	26	3
	17						2	7	17	12	5	9	11
	1
4	2																		4																		4
	3						14	11	15	10	13	18	23
	4						6	16	23	10	7	21	14	12
	5				10	12	17	28	3	14	9	18	11	16	10
	6			16	16	15	18	48	8	29	22	9	17	31	21	8
	7		9	34	24	10	5				18	12	11	17	17	11	6
	8		49	22	30	48	44				16	28	12	9	24	23	20
	9		17	11	14	34	50				9	22	14	14	32	25	21
	10		23	17	33	16	9				19	9	9	6	17	16	18
	11		34	15	15	5	19	21	13	15	16	12	28	19	23	13	21
	12		38	12	13	9	7	7	5	6	10	24	22	9	22	27	20
	13		9	12	13	9	3	12	21	13	3	8	26	7	32	8	9
	14			24	28	20	6	12	7	6	8	8	7	10	18	15
	15				15	8	7	8	17	5	10	10	6	5	12
	16					2	5	3	16	5	7	6	17	3
	17						5	1	14	14	4	6	4
	1
5	2																		5																		5
	3						11	8	13	19	12	19	24
	4						7	8	30	9	11	12	23	8
	5				13	10	15	38	10	20	8	12	14	15	10
	6			13	25	22	5	62	12	38	30	10	14	32	12	11
	7		5	29	19	12	3				15	14	14	16	27	14	9
	8		41	36	41	60	32				18	24	11	12	27	19	9
	9		8	18	18	38	40				7	19	22	17	19	28	15
	10		18	12	33	19	9				18	7	6	7	16	21	20
	11		33	16	13	13	10	18	15	14	6	28	33	17	29	21	29
	12		42	24	18	13	12	6	12	3	9	23	22	8	13	25	26
	13		14	16	7	10	5	11	14	6	8	10	15	9	24	9	11
	14			19	27	12	2	9	7	3	7	8	10	3	10	11
	15				14	4	9	11	15	6	9	12	16	3	7
	16					4	5	3	21	4	5	19	24	7
	17						3	7	18	12	1	4	4
	1
6	2																		6																		6
	3						15	11	13	16	16	18	16
	4						13	12	31	20	13	16	11	11
	5				15	5	11	35	8	26	7	20	12	13	11
	6			13	12	18	9	43	15	32	25	14	17	35	16	14
	7		5	27	21	19	6				15	21	17	20	29	11	11
	8		49	22	35	52	30				19	29	18	11	23	13	18
	9		15	14	7	34	33				12	21	18	13	32	26	14
	10		16	23	40	24	4				23	15	10	8	21	13	12
	11		42	16	13	17	13	21	20	16	18	28	33	17	13	14	13
	12		39	19	13	9	15	4	11	4	16	23	18	14	23	26	19
	13		14	15	12	11	13	20	14	11	16	9	20	8	24	7	10
	14			18	44	13	3	9	11	9	8	3	8	7	22	16
	15				20	10	20	16	23	10	10	18	11	5	11
	16					7	7	10	32	8	9	25	24	7
	17						5	2	18	13	2	10	9
	1
7	2																		7																		7
	3						8	7	14	8	20	19	27
	4						13	9	36	10	9	7	16	5
	5				9	9	15	33	10	18	8	10	8	15	11
	6			18	13	15	12	47	11	28	36	4	21	40	13	12
	7		9	26	13	11	9				14	19	12	18	24	13	11
	8		57	32	26	42	43				24	13	7	9	17	19	13
	9		15	18	13	43	39				7	17	14	8	29	19	17
	10		15	16	28	18	12				12	11	19	8	19	15	19
	11		36	20	11	8	20	28	9	13	12	18	23	15	24	26	21
	12		36	18	12	14	8	7	9	7	18	27	21	9	18	25	24
	13		18	12	15	10	10	16	20	10	9	10	22	7	14	5	14
	14			21	33	12	4	8	14	2	7	5	11	3	12	9
	15				17	7	5	14	13	5	8	16	9	1	10
	16					5	4	6	23	10	6	19	10	4
	17						4	5	19	16	3	11	3
	1
8	2																		8																		8
	3						8	5	18	11	16	22	25
	4						10	4	27	13	9	7	16	7
	5				14	5	11	37	9	21	5	13	7	12	7
	6			11	16	13	6	41	10	21	21	10	18	35	14	6
	7		6	24	28	15	0				11	14	21	17	18	12	10
	8		58	34	25	57	38				19	18	8	9	17	11	12
	9		15	16	14	32	24				8	15	11	12	27	30	16
	10		19	19	35	22	8				17	13	9	3	17	27	20
	11		30	16	19	13	13	16	18	23	13	28	17	13	21	17	23
	12		46	22	17	3	7	6	13	9	10	27	21	9	21	27	28
	13		14	14	20	10	6	20	11	16	7	12	19	9	28	8	12
	14			24	39	13	7	7	15	2	1	13	9	7	16	13
	15				16	7	5	9	17	17	4	3	10	10	12
	16					6	9	7	23	5	5	21	15	7
	17						3	9	12	12	5	7	7
	1
9	2																		9																		9
	3						10	7	13	22	23	20	20
	4						4	12	27	13	8	16	18	11
	5				9	9	19	43	10	19	9	16	5	8	12
	6			10	11	25	15	46	7	33	31	12	17	22	13	13
	7		10	20	19	18	5				9	13	15	22	28	14	9
	8		44	38	32	52	28				21	29	6	10	30	20	13
	9		8	7	6	33	28				11	11	16	8	36	19	17
	10		8	16	26	16	10				19	9	18	9	16	13	9
	11		32	14	8	10	18	17	18	15	10	13	32	14	20	13	26
	12		35	28	12	15	13	8	9	2	6	14	10	10	15	22	22
	13		13	16	7	22	8	15	14	7	8	12	17	7	15	3	10
	14			19	32	20	3	6	8	5	6	13	6	4	20	19
	15				17	11	11	16	22	11	12	17	12	5	10
	16					6	10	7	17	7	7	18	27	6
	17						4	10	25	10	4	13	8
	1
10	2																		10																		10
	3						11	8	14	13	19	20	11
	4						9	7	20	14	16	10	12	8
	5				17	6	6	32	6	24	8	14	8	8	13
	6			6	19	15	7	37	11	43	26	12	17	22	14	11
	7		11	26	25	13	9				10	9	13	14	22	10	12
	8		51	20	22	44	24				24	16	9	13	25	14	13
	9		18	12	19	36	26				7	20	16	13	27	15	16
	10		12	11	30	19	10				16	5	15	8	17	10	17
	11		33	10	7	5	15	16	15	12	16	24	26	14	14	13	28
	12		41	11	10	5	9	6	11	4	12	25	21	12	22	24	28
	13		19	9	10	15	12	14	9	6	9	12	24	12	32	8	10
	14			17	31	19	5	13	11	3	5	6	11	12	16	15
	15				14	7	6	8	17	7	12	14	21	10	7
	16					5	4	5	27	10	4	31	30	7
	17						6	6	28	20	10	11	4

## Sheet: FI
FractionationIndices
Signals of insufficient quality were excluded from the property maps. Signals could be rejected based on noise low amplitude, large artefacts or ventricluar farfields that could not be substracted. Fractionation index is particularly sensitive to noise. Therefore electrodes with substantial noise are more strictly excluded.
		1	2	3	4	5	6	7	8	9	10	11	12	13	14	15	16	17
1	1					3.82367	3.65632	3.73253	4.25185	3.95309	3.85926	3.83863	4.15892	4.50365					1																		1
	2					2.51914	3.55746	3.16626	3.51597	3.41791	2.5675	3.5086	4.11084	4.54726	4.6
	3			2.90864	2.24272	2.85086	2.19268	1.93797	1.66422	2.80451	2.09926	2.85539	3.44963	3.64339	3.2419	2.40648
	4		3.315	2.23267	2.72525	3.29584	2.26238	2.01985	1.73086	2.88221	1.64216	1.92629	3.46096	3.1358	2.33661	1.855	1.64851
	5	3.8225	2.85714	3.07711	3.13793	3.64373	3.09606	2.48507	1.57816	2.8396	0.97549	1.55556	2.0425	2.33333	1.69512	2.02927	2.06914	1.53563
	6	2.87781	2.04938	5.48039	5.53511	3.30476	1.32924	1.97519	2.66089	2.82828	1.09246	1.96491	1.06188	2.15228	1.67892	1.24586	1.17433	0.695122
	7	6.00251	2.25061	2.43415	2.36211	2.69139	1.80435	2.75871		2.95074	1.71007	2.60837	0.671605	1.92	2.19451	1.75121	0.751756	1.13835
	8	3.85464	2.55528	3.00739	2.40909	3.37678	3.22738	2.31095			2.02169	2.84915	1.09852	1.29529	3.00501	2.66093	1.67606	0.679814
	9	2.13784	2.62654	1.69779	2.57314	3.15439	2.55774	2.58272	3.11736	2.51084	1.72922	1.83971	1.89806	1.44059	3.04218	3.32673	2.46341	1.24018
	10	2.32754	4.74447	5.04126	3.38313	2.61151	2.36408	2.72927	2.56835	2.26923	1.95724	0.917062	1.79808	1.71883	2.30147	2.37198	2.66667	1.62181
	11	2.66256	2.84783	4.29594	3.65291	5.84096	2.61483	2.91106	1.2766	1.75	2.00719	1.28538	1.32779	1.98554	1.55769	1.35545	2.06338	1.20183
	12	3.39952	2.63294	5.50119	2.62919	3.13043	2.753	1.49052	1.3943	2.05981	2.30476	1.76651	1.28471	1.58057	1.53052	1.4356	0.851852	0.981777
	13	3.23855	2.82212	2.54415	2.26056	2.26714	2.15403	1.5814	1.93939	2.65176	2.41315	2.27187	1.49531	1.58865	1.3528	0.501149	0.622426	0.48764
	14		2.50856	2.46172	2.12706	1.98592	2.04651	1.91935	1.87907	2.39767	2.33333	2.23488	1.52656	1.23666	0.703448	0.539683	0.466063
	15			1.98341	3.64403	2.27972	1.75176	1.95349	1.53881	1.79176	1.8945	1.64989	1.06164	1.00228	0.624714	0.501134
	16				1.41492	1.19722	1.29837	2.097	1.82648	1.64545	1.29638	1.27602	0.914027	0.678733	0.452273
	17					1.27356	1.19861	1.5137	1.39498	1.00227	0.71267	1.37955	0.826185	0.574661
2	1					3.72857	3.60333	3.67689	3.80238	3.68345	3.60287	3.61244	3.94762	4.13189					2																		2
	2					2.43468	3.18616	2.90931	3.30676	3.2954	2.68675	3.39952	3.98807	4.13744	4.18689
	3			2.73031	2.10926	2.92124	2.17633	1.85301	1.28846	2.90073	1.86232	2.71599	3.21327	3.47573	2.8744	2.16381
	4		2.8101	2.28744	2.64508	3.07729	2.18599	1.65542	1.69417	3.00725	1.82775	1.66906	3.03632	3.00243	2.1494	1.61408	1.64477
	5	3.42611	2.39467	2.90144	2.65311	3.2	2.94749	2.03606	1.46635	2.70218	1.01435	1.39709	1.75426	2.13268	1.52163	2.07194	2.10096	1.53012
	6	2.79557	2.10784	5.45192	5.14524	3.64085	1.04096	1.69807	2.4988	2.49157	0.947242	1.55556	0.782082	2.1941	1.73012	1.16705	1.14692	0.68171
	7	5.95366	2.16587	2.00477	2.25059	2.43262	1.55714	2.37864		2.68496	1.60766	2.41748	0.56691	1.73723	2.14806	1.80238	0.692483	1.1897
	8	3.6837	2.40633	2.60095	2.26573	3.40741	2.88571	1.91971			1.77857	2.48551	1.12683	1.3149	2.95122	2.79808	1.72581	0.781038
	9	2.01716	2.45763	1.35238	2.63551	3.40749	2.42993	2.26877	2.65311	2.03774	1.5058	1.73821	1.64663	1.20863	2.79903	3.16507	2.4279	1.34475
	10	2.24213	4.22967	5.23389	3.3381	2.50939	2.2119	2.44048	2.41371	1.90632	1.67907	0.819861	1.56161	1.47619	2.20144	2.06459	2.38876	1.69725
	11	2.42243	2.8119	4.14623	3.41232	5.64085	2.52471	2.55634	1.44056	1.54186	1.79439	1.26389	1.2634	1.77488	1.49043	1.27294	1.84687	1.27376
	12	3.27488	2.60698	5.11268	2.49412	2.96235	2.45708	1.31735	1.17281	1.74014	1.98601	1.72791	1.28966	1.56206	1.50234	1.49537	0.883028	1.07901
	13	3.13976	2.62118	2.48832	2.4594	2.26218	2.01142	1.34157	1.59091	2.33945	2.45012	2.30858	1.48736	1.63279	1.26897	0.594037	0.531674	0.515556
	14		2.54524	2.62911	1.9908	1.95642	1.79908	1.62613	1.54464	1.99774	2.27002	2.12815	1.52727	1.31818	0.820046	0.580717	0.480984
	15			2.03953	4.05505	2.25858	1.39498	1.64334	1.42572	1.53778	1.68151	1.53378	1.06081	1.13034	0.730769	0.502232
	16				1.68265	1.40046	1.20595	1.81448	1.45898	1.36726	1.24558	1.06874	0.753333	0.695556	0.55481
	17					1.30296	0.995506	1.20852	1.09471	0.982222	0.811947	1.29451	0.730684	0.575221
3	1					3.48921	3.42686	3.43437	3.6555	3.6335	3.58738	3.75971	4.24634	4.40095					3																		3
	2					2.01675	2.93062	2.83133	3.13735	3.11002	2.49631	3.51582	4.1878	4.46192	4.50614
	3			2.58252	2.18248	2.75303	2.38293	1.93627	1.14734	2.9727	1.92308	2.77073	3.09559	3.62408	3.23399	2.14425
	4		2.99256	2.00243	2.5602	3.15764	2.33663	1.89926	1.511	3.11386	1.64532	1.82921	3.46617	2.89383	2.11002	1.76528	1.59367
	5	3.6175	2.50372	2.92892	2.72087	3.2598	2.81907	2.02934	1.54146	2.72549	0.97543	1.44691	1.93924	2.27407	1.54479	1.96403	2.11192	1.72573
	6	2.7625	1.93564	5.74074	5.35109	3.5878	1.07264	1.59902	2.69927	2.58128	0.845588	1.74	0.916877	2.30151	1.73153	1.14657	1.11271	0.801932
	7	5.86946	2.25926	1.98044	2.2155	2.41943	1.54878	2.45343		2.64634	1.4891	2.61481	0.616541	1.85063	2.27228	1.62319	0.637209	1.11456
	8	3.56328	2.8963	2.8835	2.17464	3.30935	3	1.94595			1.60095	2.56627	1.0775	1.33083	2.59057	2.43176	1.6533	0.682759
	9	1.8025	2.65271	1.6545	2.38849	3.07914	2.2871	1.97059	2.62836	1.98095	1.40141	1.65802	1.64878	1.2725	2.79104	3.06965	2.16949	1.2
	10	2.18657	4.06667	5.01478	3.16465	2.42446	1.92806	2.33985	2.3759	1.962	1.61557	0.825175	1.70047	1.6088	2.1699	1.91546	2.51319	1.49884
	11	2.31281	2.67397	4.05109	3.34793	5.86408	2.29567	2.61005	1.21831	1.43499	1.77778	1.20188	1.23185	1.7767	1.53382	1.17143	1.81324	1.20554
	12	3.22518	2.40573	5.31894	2.05967	3.00481	2.25653	1.12009	1.01166	1.7822	2.07329	1.62441	1.20746	1.58852	1.36124	1.34824	0.818605	1.03687
	13	3.10896	2.65144	2.26179	2.01179	1.85748	1.76102	1.32648	1.42396	2.15385	2.27465	2.28571	1.48598	1.54137	1.19484	0.530233	0.592166	0.466063
	14		2.34615	2.15294	1.67133	1.66512	1.5186	1.48853	1.41818	1.84259	2.13395	2.10624	1.44804	1.2	0.734411	0.516055	0.421412
	15			1.83962	3.57907	2.09324	1.10723	1.51389	1.23182	1.36986	1.50459	1.43021	0.949657	0.891455	0.57931	0.466819
	16				1.33023	1.16512	0.985981	1.73318	1.41084	1.18284	1.1693	0.920814	0.653061	0.636156	0.443936
	17					1.12791	0.865741	1.08716	1.04072	0.855856	0.773034	1.01354	0.664399	0.551802
4	1					3.57995	3.58993	3.64748	3.71845	3.71776	3.52683	3.48309	3.7335	4.19951					4																		4
	2					2.07876	3.0146	2.98789	3.05825	3.01733	2.43103	3.37956	3.97277	4.18953	4.36776
	3			2.51208	2.1253	2.63438	1.9505	1.9532	1.23301	2.81818	1.77723	2.4914	3.00246	3.35697	2.98267	2.11139
	4		2.92892	1.90049	2.37685	2.84406	2.01241	1.76108	1.39901	2.83911	1.54768	1.64286	3.11809	2.77861	2.18978	1.53713	1.62716
	5	3.35644	2.17079	2.66584	2.58722	3.04914	2.64303	1.98272	1.30788	2.43951	0.856098	1.33744	1.84864	2.22494	1.41687	1.87864	2.13659	1.65122
	6	2.41439	1.76617	5.46798	5.59658	3.26521	0.92665	1.63882	2.19165	2.19656	0.757282	1.47772	0.814356	2.20792	1.67067	1.20379	1.08916	0.829268
	7	5.59852	2.03676	1.78589	2.12165	2.29426	1.46731	2.42822		2.5	1.31463	2.21921	0.490148	1.83333	2.29557	1.8171	0.818182	1.08413
	8	3.51244	2.49136	2.7266	2.03415	3.0649	2.875	2.17778			1.61111	2.42543	0.833333	1.1284	2.7425	2.69024	1.76941	0.869266
	9	2.09406	2.71782	1.309	2.42195	3.12319	2.31144	2.30221	2.6088	2.05036	1.49173	1.43333	1.6088	1.09559	2.87593	3.12219	2.42206	1.3894
	10	2.16337	4.08454	4.76386	3.26895	2.50483	2.07264	2.42402	2.21446	1.86058	1.62411	0.767606	1.62077	1.48049	2.1439	1.88729	2.45192	1.50233
	11	2.43415	2.53095	3.75359	3.52058	6.12409	2.44444	2.73986	1.27014	1.46778	1.74048	1.18824	1.27251	1.80145	1.39759	1.23095	1.83411	1.15753
	12	3.4092	2.29524	5.07746	2.2446	2.90291	2.51887	1.3418	1.24942	1.78199	2.04048	1.74941	1.36	1.48931	1.44076	1.44213	0.813212	1.01577
	13	3.22304	2.79319	2.44706	2.13551	2.03935	1.89838	1.3954	1.56422	2.36706	2.33333	2.25874	1.37089	1.48946	1.22454	0.61086	0.622172	0.478652
	14		2.55446	2.35198	1.93303	1.96536	1.7037	1.54734	1.52392	1.85092	2.05774	2.06019	1.48618	1.17471	0.840909	0.575964	0.446429
	15			1.91628	3.94688	2.22685	1.35402	1.68433	1.33713	1.51025	1.64155	1.57208	1.02045	0.89819	0.595937	0.425676
	16				1.3555	1.1129	1.11468	1.9537	1.46712	1.40909	1.37162	1.11937	0.808126	0.608108	0.512415
	17					1.16092	0.90553	1.26835	1.14943	0.90583	0.733781	1.17793	0.710762	0.60771
5	1					3.72143	3.73571	3.78554	3.84856	3.8125	3.63962	3.73381	3.94417	4.14251					5																		5
	2					2.2148	3.10926	2.8801	3.13462	3.26895	2.52415	3.46618	4.0747	4.17848	4.21376
	3			2.92421	2.33656	2.82609	2.2767	2.04831	1.35904	2.81265	1.83535	2.73012	3.24396	3.23227	2.96305	2.19458
	4		3.21235	2.04433	2.65185	3.38614	2.03178	1.6399	1.56311	2.93674	1.72506	1.7029	3.29902	2.86486	2.04156	1.61029	1.66176
	5	3.38875	2.35627	3.10269	3.0665	3.24029	2.64216	1.98778	1.49633	2.57598	1.02657	1.4891	2.01975	2.5098	1.56971	2.09268	2.37317	1.81553
	6	2.48276	1.49383	5.4747	5.50962	3.1199	1.15159	1.75245	2.21027	2.47087	0.876812	1.66098	0.963415	2.27833	1.89688	1.18458	1.23729	0.956627
	7	5.95522	2.1122	1.82367	2.18396	2.2823	1.92754	2.64059		2.57178	1.59662	2.33816	0.682809	1.99017	2.22927	1.88732	0.734411	1.21531
	8	3.01467	2.44499	3.18689	2.25532	3.22931	3.13942	2.08621			1.78795	2.44686	1.03382	1.27696	2.99751	2.48193	1.85747	0.734091
	9	1.83498	2.55637	1.45894	2.4067	3.11933	2.44526	2.13447	2.64337	2.21378	1.6052	1.53791	1.58354	1.31068	2.97778	3.08717	2.42553	1.27211
	10	2.05926	3.62228	4.97579	3.12077	2.44418	2.32936	2.40876	2.3747	2.04276	1.80332	0.720379	1.49881	1.52899	2.17391	2.03571	2.50355	1.62442
	11	2.0321	2.69976	3.93079	3.37947	5.42353	2.38955	2.69834	1.37412	1.48936	1.85579	1.23168	1.16706	1.81971	1.4105	1.4316	1.84186	1.33333
	12	3.44686	2.34597	5.32243	2.25581	2.68545	2.37559	1.30324	1.10047	1.82394	2.02594	1.78118	1.30841	1.54869	1.4507	1.50115	0.824201	1.09297
	13	3.28571	2.67391	2.44444	2.23256	2.18014	1.903	1.28798	1.49773	2.42093	2.42155	2.40888	1.49299	1.51636	1.27918	0.567873	0.577878	0.428251
	14		2.38313	2.44811	2.14651	2.01628	1.73624	1.53378	1.53708	1.91514	2.18433	2.18287	1.53226	1.33641	0.674944	0.524775	0.392377
	15			2.07277	4.06061	2.10417	1.23041	1.53303	1.2764	1.56433	1.90703	1.62358	1.14189	1.07416	0.587838	0.460674
	16				1.5514	1.21528	0.972286	1.73333	1.4417	1.29148	1.30543	1.11236	0.856823	0.792873	0.524664
	17					1.24828	0.860731	1.04119	1.09663	0.872197	0.781532	1.20946	0.717489	0.624161
6	1					3.60732	3.59709	3.73219	4.0098	3.80149	3.70792	3.87593	4.10149	4.23153					6																		6
	2					2.25917	3.2878	3.00973	3.55037	3.13268	2.4532	3.3017	4.08933	4.43182	4.285
	3			2.74627	2.2963	2.68642	2.32338	1.84841	1.39604	2.71605	1.68049	2.70732	3.35264	3.475	2.8536	1.92714
	4		3.06566	1.88	2.4534	3.2818	2.29825	1.96806	1.44499	2.92519	1.70976	1.74447	3.60202	2.95	1.94608	1.69307	1.66667
	5	3.81772	2.43609	2.96977	2.74055	3.41294	3.1475	2.45792	1.32763	2.59901	1.1165	1.73284	2.2375	2.24938	1.52289	1.98284	1.97297	1.31618
	6	2.53266	2.01	5.25062	5.34644	3.7199	1.17164	2.28465	2.69383	2.66667	1.0878	1.71358	1.01759	2.18182	1.77108	1.22619	1.14528	0.836585
	7	5.80893	2.2266	1.85086	2.26161	2.52048	1.86978	3.0275		3.0716	1.73171	2.56328	0.755556	1.95696	2.2	1.74224	0.672941	1.16746
	8	2.80952	2.51605	2.55665	2.19756	3.45036	3.09091	2.34577			1.98778	2.92195	1.09606	1.32331	2.90886	2.60149	1.64151	0.866197
	9	1.97229	2.56079	1.47445	2.64792	2.81663	2.41523	2.4602	2.75123	2.29782	1.72749	1.94588	1.93137	1.35732	2.92677	3.42607	2.62195	1.37296
	10	2.365	3.18564	5.01966	3.15403	2.42683	1.92683	2.57946	2.52439	2.19471	1.84211	1.05176	1.70673	1.58231	2.30562	2.13221	2.63373	1.65957
	11	2.34913	2.60391	4	3.44853	5.8	2.51332	2.67952	1.37709	1.79518	1.85851	1.37736	1.48471	1.74272	1.44952	1.3747	1.98578	1.24242
	12	3.54167	2.37317	5.14425	2.31971	2.77913	2.72573	1.55059	1.49526	2.07933	2.21875	1.88361	1.37264	1.64423	1.46318	1.42623	0.807425	0.981352
	13	3.37343	2.85961	2.60784	2.30952	2.16945	2.04215	1.70766	1.90632	2.5619	2.51574	2.4	1.57895	1.68974	1.27739	0.533487	0.615741	0.486111
	14		2.67327	2.65301	2.0922	1.95775	2.04965	1.97897	1.9486	2.25416	2.32783	2.24466	1.59535	1.40094	0.766744	0.596774	0.537037
	15			1.96675	3.76761	2.2634	1.49765	1.8271	1.56279	1.80046	1.83796	1.6412	1.18056	1.21101	0.769585	0.582949
	16				1.28404	1.03271	1.28302	2.13208	1.91355	1.65977	1.30822	1.22654	0.923963	0.845977	0.615207
	17					1.21412	1.01865	1.37123	1.51157	1.10624	0.91762	1.36156	0.821346	0.556322
7	1					3.80907	3.74341	3.7823	3.74519	3.77163	3.64734	3.66506	4.17918	4.20874					7																		7
	2					2.21292	3.32452	3.01932	3.15459	3.15049	2.51456	3.35024	4.23544	4.5875	4.40842
	3			2.76627	2.39518	2.94928	2.42998	2.00484	1.28846	2.97094	1.9686	2.57627	3.33171	3.29104	2.79361	2.14914
	4		2.74634	1.99272	2.43902	3.16949	2.36919	1.90024	1.53641	3.21655	1.62077	1.74817	3.24198	2.92195	2.21516	1.69249	1.45742
	5	3.09383	2.35062	2.63415	2.45783	3.14563	3.11247	2.57039	1.39709	2.64165	0.927361	1.45122	1.93812	2.21324	1.61337	1.9689	2.11217	1.66187
	6	2.38861	1.49754	5.14563	4.86905	3.47229	2.16827	2.2233	2.6335	2.8747	0.854722	1.64563	0.873171	2.37562	1.92944	1.13817	1.1533	0.899522
	7	5.84975	1.96845	1.83894	2.1555	2.3128	1.5	3.03398		2.84096	1.52998	2.26214	0.57561	1.95577	2.26161	1.79036	0.781395	1.14151
	8	3.0049	2.3701	2.73479	2.10501	3.23404	3.27751	1.9561			1.81473	2.3726	0.968523	1.28747	2.87313	2.63971	1.72365	0.737931
	9	1.85323	2.80098	1.43765	2.42857	2.9378	3.83732	2.18491	2.66908	2.1866	1.41176	1.68396	1.62651	1.30583	2.92099	3.30221	2.35492	1.21149
	10	1.96088	2.80097	5.08696	3.08475	2.3753	2.01199	3.44125	2.38186	2.00952	1.65012	0.857143	1.58629	1.5314	2.15534	1.76077	2.4038	1.44084
	11	2.12833	2.45498	3.66511	3.24821	5.42043	2.33492	2.53444	1.11944	1.87943	1.86331	1.27739	1.36	1.82742	1.31175	1.33333	1.81132	1.26316
	12	3.38517	2.12646	5.30751	2.20188	2.5967	2.5363	1.25754	2.0771	1.89882	2.09716	1.83294	1.45688	1.59813	1.51667	1.49881	0.813793	1
	13	3.1816	2.75414	2.68	2.18329	1.90023	1.7321	1.35566	2.91034	2.18415	2.33019	2.51059	1.64103	1.67136	1.21114	0.511468	0.684932	0.438479
	14		2.34293	2.37352	2.07425	1.67972	1.56148	1.48853	1.49773	2.11034	2.13103	2.17016	1.69585	1.25522	0.644647	0.611872	0.524664
	15			1.81882	4.19169	2.14977	1.17051	1.46682	1.30682	1.45125	1.62812	1.44595	1.1448	1.04556	0.668182	0.617647
	16				1.43318	1.2529	1.30485	1.84828	1.48643	1.33933	1.21847	1.04944	0.77551	0.723356	0.68254
	17					1.10321	1.03218	1.23636	1.13544	0.908277	0.819005	1.26757	0.754545	0.609977
8	1					3.37678	3.25238	3.46154	3.50242	3.69471	3.5895	3.80435	4.21602	4.45985					8																		8
	2					2.12827	2.86988	2.76442	3.08717	3.20438	2.32274	3.49879	4.2439	4.55693	4.45771
	3			2.55932	2.30657	2.82775	2.19512	2.00735	1.24819	2.87348	1.61481	2.73105	3.13022	3.34804	3.1358	1.99257
	4		2.7371	1.74817	2.39216	3.05623	2.07635	1.80296	1.62347	2.99509	1.47537	1.67647	3.05926	2.92138	2.26108	1.61179	1.69779
	5	3.24198	2.1299	2.58621	2.44254	3.10269	2.87654	2.33415	1.22414	2.39803	0.97549	1.48768	1.9802	2.25123	1.53155	1.99027	2.10049	1.59611
	6	2.38725	1.78378	4.90754	4.96875	3.14286	2.16953	1.99263	2.35784	2.64865	0.944039	1.62716	0.911765	2.18454	1.78186	1.22118	1.04843	0.837772
	7	5.27561	1.86829	1.68599	2.04327	2.28504	1.64964	2.69136		2.74384	1.6472	2.38025	0.587805	1.9206	2.31852	1.85472	0.741784	1.10817
	8	2.95366	2.4902	2.67476	2.06699	3.04028	3.05276	1.75369			1.77885	2.74334	1.03415	1.46287	2.81638	2.65441	1.9507	0.916859
	9	1.7975	2.54187	1.63107	2.53938	2.7119	3.64806	2.21569	2.48537	1.89524	1.48349	1.77725	1.71394	1.43066	2.7451	3.24272	2.51816	1.4046
	10	1.98	2.87593	4.50611	3.1759	2.35492	1.86375	3.33824	2.2109	1.78147	1.52706	0.778555	1.68333	1.65625	2.15274	2.07075	2.5895	1.59259
	11	2.2203	2.63133	3.68646	3.28193	5.39329	2.31655	2.48463	1.1171	1.61557	1.67765	1.26056	1.41882	2.03349	1.58491	1.65035	1.91183	1.24771
	12	3.36098	2.18052	5.57075	2.10588	2.58234	2.40941	1.23095	2.0464	1.89671	1.9434	1.60798	1.32093	1.75231	1.669	1.5711	0.799087	0.988662
	13	3.26341	2.84783	2.61611	2.41218	2.05104	1.8037	1.30963	3.1789	2.27146	2.38498	2.29439	1.5576	1.6129	1.38322	0.582393	0.758465	0.546875
	14		2.59712	2.56872	2.14988	1.84149	1.70534	1.67735	1.62415	2.16552	2.10526	2.12128	1.55809	1.37838	0.832957	0.689888	0.548315
	15			2.19906	4.12412	2.16084	1.26402	1.71065	1.42045	1.73059	1.75342	1.60586	1.18386	1.10714	0.813901	0.595078
	16				1.47235	1.19672	1.20141	2.06713	1.681	1.45618	1.28795	1.2784	0.955357	0.772829	0.683742
	17					1.02069	0.967963	1.26256	1.26906	0.986667	0.902004	1.41333	0.853007	0.701559
9	1					3.53735	3.59472	3.66667	3.72993	3.73892	3.51582	3.66828	4.04208	4.21516					9																		9
	2					2.16945	3.0119	2.76134	3.13285	3.11029	2.52029	3.40811	4.21182	4.38366	4.33333
	3			2.53995	2.24757	2.83051	2.29612	1.86408	1.07005	2.84559	2.01463	2.66988	3.21707	3.57108	3.06341	2.14039
	4		2.89681	1.83535	2.41363	3.32927	2.21027	1.68856	1.60628	2.98526	1.63592	1.71883	3.215	3.02993	2.17762	1.69287	1.4401
	5	3.4398	2.28676	2.62654	2.93462	3.3494	2.99034	2.05769	1.28814	2.63547	1.04612	1.48411	1.89578	2.29238	1.61353	2.08937	2.06585	1.44417
	6	2.34644	1.63504	5.17718	5.09246	3.2506	0.971223	2.03614	2.65301	2.27119	0.975904	1.71394	0.874693	2.07731	1.89409	1.28842	1.20433	0.885922
	7	5.20741	2.34466	1.84096	2.0881	2.23389	1.72464	2.40342		2.46618	1.48798	2.41748	0.521951	1.93564	2.32099	1.87167	0.908451	1.29594
	8	3.10488	2.35452	2.45366	1.97608	2.75598	2.72115	1.85294			1.69762	2.72771	1.05085	1.34314	2.71852	2.52334	1.89549	0.974596
	9	1.92556	2.65764	1.52899	2.247	2.67952	2.06538	2.20049	2.31084	1.95498	1.39294	1.58353	1.76867	1.34951	2.64078	2.95631	2.50602	1.50117
	10	2.04167	3.26392	5.15459	3.07005	2.36983	1.79419	2.23188	2.0881	1.78014	1.48478	0.773364	1.65877	1.59759	2.1274	1.85372	2.66507	1.81368
	11	2.24455	2.60192	3.53237	3.25952	5.33094	2.18841	2.39765	1.01412	1.38061	1.64403	1.25293	1.3528	1.8381	1.19952	1.29454	2.06604	1.43256
	12	3.36691	2.17925	5.06413	2.08831	2.65394	2.19194	1.22042	0.990676	1.82394	1.94104	1.64554	1.36279	1.66824	1.38642	1.64103	0.96347	1.03917
	13	3.16462	2.80676	2.64303	2.36706	2.06047	1.7814	1.29954	1.50345	2.26464	2.31925	2.23543	1.54545	1.72365	1.45727	0.721719	0.874429	0.584475
	14		2.56553	2.42105	2.07442	1.8548	1.66821	1.56452	1.64368	1.86927	2.21163	2.09655	1.52982	1.43707	0.881279	0.660674	0.584091
	15			1.91706	4.3683	2.41067	1.2645	1.58391	1.47706	1.71724	1.85126	1.51351	1.18059	1.26067	0.895928	0.595023
	16				1.70998	1.34793	1.13256	1.9611	1.71946	1.50337	1.43049	1.12832	0.929047	0.895787	0.790068
	17					1.19725	0.96789	1.28054	1.34831	1.16518	1.01114	1.32373	0.911111	0.690949
10	1					3.4381	3.57005	3.54722	3.523	3.57246	3.49395	3.57452	4.0709	4.25307					10																		10
	2					2.12619	3.11353	2.64663	2.99512	3.08293	2.59611	3.21256	4.14563	4.3825	4.27407
	3			2.43932	2.3717	2.67633	2.47816	1.80872	1.0438	2.80637	1.69554	2.54412	3.18473	3.42394	3.13433	1.81728
	4		2.7056	1.86232	2.39173	2.98544	2.19315	1.86732	1.63814	2.98775	1.59559	1.61314	3.00993	2.65835	2.3154	1.58065	1.61235
	5	3.16995	2.12136	2.52798	2.39225	2.94161	2.5599	2.07371	1.42157	2.34963	0.902439	1.51208	1.86634	2.09877	1.62228	2.1087	2.19118	1.6348
	6	2.22983	1.57457	5.27184	4.93494	3.10145	0.839416	1.66176	2.48529	2.37621	1.00243	1.67482	0.837905	2.1864	1.96594	1.29206	1.13302	0.919708
	7	4.88537	2.32374	1.79236	2.0381	2.30569	1.59611	2.30732		2.69249	1.57108	2.33985	0.540943	1.76692	2.16256	1.89762	0.758621	1.15566
	8	3.05623	2.67874	2.34368	2.02619	3.06353	2.72993	1.7543			1.75904	2.76029	0.875	1.16332	2.68069	2.71287	2.01402	0.974886
	9	1.74129	2.73966	1.642	2.46062	2.9078	2.10096	2.29684	2.4733	2.10689	1.43396	1.73159	1.75	1.31931	2.83663	3.32921	2.46618	1.56751
	10	2.15441	3.01711	4.77859	3.0534	2.20331	1.77381	2.35749	2.23571	1.89835	1.64539	0.796253	1.73077	1.61386	2.12745	2.09615	2.66667	1.8345
	11	2.17531	2.59472	3.57554	3.12352	4.9905	2.20331	2.49766	1.11395	1.49296	1.85343	1.28271	1.45305	1.96117	1.54348	1.50474	2.10353	1.47806
	12	3.30769	2.26492	5.26526	2.21226	2.76123	2.20833	1.16401	1.15367	1.94131	2.0771	1.76869	1.42093	1.8	1.63915	1.62704	0.944186	1.21478
	13	3.03883	2.7494	2.57576	2.42093	2.18894	1.92857	1.33941	1.48299	2.39631	2.3907	2.39252	1.58796	1.85211	1.38695	0.631336	0.832184	0.593258
	14		2.65207	2.51765	2.15081	2.07425	1.78391	1.62415	1.47748	2.05046	2.29561	2.20091	1.65977	1.71429	0.804598	0.676471	0.588235
	15			2.08333	4.57009	2.52214	1.32639	1.81839	1.58145	1.86517	1.8722	1.74664	1.35068	1.34169	0.884615	0.629545
	16				1.74014	1.33411	1.19124	2.02315	1.71171	1.50333	1.44989	1.22717	1.01342	0.928571	0.852679
	17					1.30254	0.907834	1.38724	1.37333	1.26622	1.03587	1.42506	0.953125	0.743363

## Sheet: CV
MeanVelocity
Signals of insufficient quality were excluded from the property maps. Signals could be rejected based on noise low amplitude, large artefact or ventricluar farfields that could not be substracted.
		1	2	3	4	5	6	7	8	9	10	11	12	13	14	15	16	17
1	1					1.06386	1.0546	1.03875	0.928318	1.00669	1.04288	1.07511	1.10101	1.15839					1																		1
	2					0.947822	0.917055	0.907584	0.860264	0.894289	0.905398	0.98691	0.973366	1.04354	0.979937
	3			0.9078	0.874828	0.898587	0.89603	0.861792	0.804154	0.819961	0.806803	0.8692	0.861478	0.855759	0.734851	0.714093
	4		0.922715	0.856092	0.890385	0.877368	0.868897	0.857427	0.876011	0.778702	0.758595	0.804363	0.747064	0.783519	0.760886	0.759404	0.713923
	5	0.882176	0.94715	0.898357	0.81791	0.83981	0.88953	0.905012	0.875379	0.84737	0.762291	0.760398	0.788073	0.782152	0.779925	0.811954	0.818882	0.825661
	6	0.912329	0.95041	0.9693	0.961893	0.921985	0.866732	0.895986	0.855915	0.791098	0.755412	0.816768	0.747864	0.832356	0.821047	0.83508	0.841041	0.865407
	7	0.920485	1.00234	0.92764	1.05566	1.16176	1.00369	0.879442		0.841472	0.715061	0.834775	0.69667	0.740869	0.799736	0.870565	0.910204	0.931571
	8	0.880208	0.926517	0.966937	1.09172	1.19889	1.08471	0.869116			0.731835	0.736589	0.670612	0.730587	0.805168	0.839548	0.855822	0.879791
	9	0.976569	1.03357	1.02495	1.0385	1.1149	0.962504	0.830684	0.787903	0.819109	0.774305	0.790243	0.776524	0.722107	0.770972	0.777759	0.776166	0.805425
	10	1.06786	0.971149	1.0192	0.983908	1.02204	0.938391	0.861298	0.739015	0.818763	0.855931	0.80508	0.841012	0.700865	0.740002	0.72779	0.746604	0.77477
	11	1.21307	1.23755	1.22228	1.05049	0.915442	0.850567	0.804083	0.764244	0.735906	0.816746	0.846896	0.840705	0.780076	0.749235	0.735051	0.778037	0.748811
	12	1.52393	1.50387	1.4378	1.20444	0.935051	0.81739	0.783975	0.733455	0.70525	0.750761	0.787618	0.771784	0.781727	0.743162	0.846826	0.790138	0.787444
	13	1.63495	1.77849	1.63985	1.33782	1.03447	0.853839	0.792401	0.750588	0.689008	0.684696	0.683011	0.708647	0.7638	0.812911	0.903818	0.890956	0.795413
	14		1.46516	1.40394	1.1687	0.968152	0.884771	0.815119	0.814942	0.719575	0.712076	0.735876	0.757871	0.82052	0.863254	0.883338	0.884052
	15			1.07315	0.995126	0.902862	0.794783	0.793453	0.798672	0.767781	0.78475	0.80841	0.879251	0.870005	0.932728	0.923759
	16				0.925604	0.829737	0.767313	0.759161	0.880453	0.801686	0.825873	0.88944	0.922504	0.947841	0.966836
	17					0.806846	0.772986	0.791646	0.870011	0.864792	0.856069	0.913734	1.01951	1.03301
2	1					1.20796	1.20815	1.23318	1.11505	1.03276	1.10973	1.25039	1.22404	1.2296					2																		2
	2					0.92074	0.988758	1.11851	0.980929	0.940674	0.927682	1.1173	1.06522	1.09351	1.01302
	3			0.981702	0.876645	0.924156	0.933909	0.937209	0.905157	0.879609	0.865895	0.925045	0.874828	0.915119	0.839499	0.811724
	4		0.965598	0.947782	0.90369	0.828212	0.860171	0.888652	0.902936	0.837905	0.770325	0.762593	0.845716	0.76861	0.788305	0.756735	0.717903
	5	0.878241	0.945358	0.971543	0.984447	0.977638	0.973806	0.937124	0.951337	0.801361	0.76513	0.760144	0.740599	0.803784	0.724103	0.763734	0.775197	0.741342
	6	0.8675	0.910235	0.97365	0.974874	0.958555	0.926759	0.854141	0.900894	0.79614	0.722576	0.771485	0.729559	0.817731	0.820605	0.771107	0.781179	0.774227
	7	0.929331	0.905601	0.925058	1.07261	1.06904	0.936881	0.859426		0.800655	0.721805	0.741013	0.701656	0.724181	0.772361	0.782659	0.801613	0.845341
	8	0.923093	1.03628	1.05592	1.1474	1.22073	1.04636	0.848339			0.705426	0.71227	0.68795	0.712129	0.748652	0.829173	0.853283	0.823
	9	0.965168	1.00855	1.06287	1.15704	1.16066	0.962251	0.840949	0.792866	0.791092	0.77965	0.734127	0.713168	0.699885	0.751107	0.775469	0.809594	0.833987
	10	1.04387	1.02346	1.06208	0.979693	0.977676	0.867623	0.834028	0.814833	0.776959	0.827037	0.839213	0.827696	0.726048	0.759938	0.740995	0.778022	0.799568
	11	1.07135	1.08136	1.08069	1.01183	0.923763	0.815098	0.882423	0.806083	0.815814	0.898946	0.913977	0.931461	0.797868	0.762182	0.741462	0.728659	0.747047
	12	1.3584	1.20743	1.14525	1.04104	0.922047	0.884426	0.856312	0.899559	0.85812	0.864612	0.903553	0.872147	0.816612	0.775561	0.831293	0.792156	0.787782
	13	1.30927	1.35328	1.31241	1.14946	0.935404	0.866096	0.872187	0.88733	0.78222	0.821762	0.899764	0.863855	0.913314	0.860062	0.886391	0.894146	0.783554
	14		1.38384	1.40108	1.19664	0.9861	0.853577	0.847769	0.867704	0.791197	0.804281	0.904175	0.914949	0.909109	0.892052	0.897793	0.927446
	15			1.09344	1.00103	0.871384	0.787156	0.911045	0.926322	0.890775	0.891558	0.951117	1.05595	1.00062	0.985914	0.972093
	16				0.900158	0.829149	0.741332	0.843	0.936561	0.957224	0.959327	1.05423	1.15694	1.07436	1.04089
	17					0.778793	0.738316	0.804863	0.943857	1.01339	0.933418	1.04103	1.15577	1.19349
3	1					1.1692	1.09976	1.17324	1.02792	1.04463	1.00422	1.14054	1.1656	1.18766					3																		3
	2					0.902607	0.983299	1.03448	0.95777	0.935491	0.862475	1.05328	1.06782	1.0237	0.887318
	3			0.879485	0.912396	0.896339	0.935923	1.00976	0.932427	0.868911	0.796553	0.882917	0.864164	0.838575	0.78593	0.793727
	4		0.793488	0.826924	0.843441	0.841662	0.900328	0.892187	0.878036	0.849408	0.791294	0.855088	0.779032	0.808339	0.774111	0.79144	0.750772
	5	0.820695	0.783928	0.825828	0.911629	0.928147	0.898771	0.884722	0.89071	0.839714	0.779511	0.75939	0.730707	0.81182	0.765955	0.856321	0.817112	0.77313
	6	0.887781	0.859405	0.960912	0.987986	0.945697	0.907126	0.902063	0.86177	0.7542	0.733583	0.746059	0.746607	0.857797	0.848727	0.86954	0.886261	0.805307
	7	0.830082	0.845872	0.850629	1.04311	1.0605	0.880367	0.808562		0.77929	0.720681	0.752109	0.720237	0.722175	0.886046	0.880043	0.867027	0.930816
	8	0.79151	0.861971	0.924709	1.04442	1.15595	0.973069	0.803182			0.759072	0.763524	0.734297	0.731533	0.78567	0.832557	0.893168	0.842074
	9	0.851173	0.906454	0.886479	1.01854	1.04473	0.926889	0.826667	0.856362	0.832712	0.822837	0.805519	0.831583	0.763337	0.788937	0.860422	0.922303	0.85623
	10	0.9209	1.01387	0.964272	0.979505	0.974224	0.884274	0.849253	0.794158	0.807615	0.832496	0.858675	0.922768	0.776849	0.802281	0.831187	0.864486	0.7868
	11	1.06774	1.20825	1.0997	1.08265	0.91282	0.88129	0.867253	0.836945	0.821384	0.860288	0.884218	0.910196	0.803031	0.790457	0.805677	0.809083	0.792198
	12	1.39602	1.38897	1.41048	1.24725	1.02182	0.815394	0.900954	0.828181	0.775315	0.883355	0.877624	0.860965	0.768052	0.791657	0.87543	0.850324	0.765068
	13	1.52407	1.53291	1.5327	1.31354	1.03255	0.909906	0.889143	0.87137	0.846229	0.791412	0.865269	0.804933	0.815832	0.838857	0.926186	0.879999	0.792403
	14		1.4278	1.39701	1.25043	1.00076	0.89289	0.852458	0.842982	0.795281	0.8201	0.910856	0.884257	0.860506	0.920243	0.928017	0.899108
	15			1.11447	1.02122	0.877202	0.817095	0.807679	0.848722	0.853493	0.88476	1.03251	1.03338	1.02556	0.963158	0.979401
	16				0.92124	0.820208	0.737986	0.805656	0.884361	0.968275	0.931535	1.12733	1.141	1.09577	1.03469
	17					0.713245	0.698152	0.769409	0.873293	0.933077	0.996335	1.15352	1.17217	1.18185
4	1					1.19822	1.18105	1.17115	1.05783	1.01339	1.13584	1.21406	1.16626	1.14801					4																		4
	2					1.03355	1.06979	1.02399	1.00949	0.887051	0.928916	1.00345	1.06514	1.02938	0.944673
	3			0.927136	0.973417	0.976341	0.941961	0.923516	0.912744	0.851026	0.838032	0.869272	0.887014	0.896938	0.831021	0.748877
	4		0.836546	0.853775	0.916189	0.890352	0.900944	0.914837	0.924767	0.832806	0.759906	0.754937	0.794706	0.799622	0.806911	0.77152	0.696885
	5	0.835068	0.869877	0.814522	0.865072	0.91332	0.920489	0.903826	0.911877	0.799335	0.72913	0.789837	0.779797	0.825434	0.795245	0.812354	0.799867	0.722689
	6	0.781781	0.800651	0.796649	0.891189	0.954499	0.88766	0.950992	0.880502	0.843856	0.759089	0.787912	0.806996	0.805945	0.780064	0.835184	0.810786	0.744005
	7	0.862937	0.842278	0.865611	0.988756	1.03039	0.948026	0.779096		0.767168	0.754711	0.740996	0.761053	0.761014	0.786837	0.861119	0.893157	0.898089
	8	0.830377	0.846419	0.961093	1.11495	1.1205	1.04543	0.809361			0.754209	0.730704	0.678576	0.716826	0.753275	0.823327	0.86123	0.859494
	9	0.917079	0.889674	0.891709	1.06426	1.02821	0.943606	0.814021	0.806721	0.851692	0.777765	0.769066	0.718152	0.734706	0.779605	0.771052	0.784053	0.808324
	10	0.98484	0.982308	1.00141	1.01559	0.971819	0.857787	0.766809	0.767206	0.798953	0.830453	0.813216	0.775951	0.718494	0.780313	0.792732	0.798867	0.774306
	11	1.09243	1.16727	1.18126	0.997796	0.916694	0.814748	0.806222	0.763855	0.824907	0.845747	0.883654	0.825408	0.799804	0.748686	0.809567	0.762066	0.744387
	12	1.42288	1.44664	1.40682	1.1029	0.847387	0.79998	0.835615	0.811126	0.777809	0.762886	0.814685	0.737797	0.786375	0.810898	0.833196	0.78136	0.767095
	13	1.5698	1.70171	1.58425	1.22135	0.982089	0.857285	0.839597	0.812812	0.797258	0.75162	0.790846	0.754207	0.816569	0.833617	0.851	0.834814	0.767669
	14		1.43081	1.31668	1.18605	0.958157	0.830325	0.772772	0.808432	0.767738	0.774624	0.822134	0.81438	0.82351	0.84983	0.908094	0.879017
	15			1.03123	0.997731	0.83604	0.816984	0.790795	0.878744	0.885947	0.799279	0.913563	0.963247	0.970897	0.946033	0.917388
	16				0.819882	0.739164	0.727698	0.762649	0.928075	0.960684	0.911861	1.02438	1.0418	1.09594	1.06249
	17					0.722233	0.671413	0.75028	0.882119	0.909082	0.901641	0.972449	1.09192	1.1733
5	1					1.13373	1.16388	1.11727	1.06629	1.06154	1.05884	1.14362	1.11688	1.09422					5																		5
	2					0.93466	1.01237	1.02756	1.0136	0.991881	0.978475	1.05902	0.9933	0.96681	0.952676
	3			0.934284	0.941163	0.89638	0.931803	0.891687	0.890997	0.910386	0.859976	0.911295	0.817335	0.88351	0.789438	0.795639
	4		0.941391	0.891087	0.896188	0.822091	0.852051	0.853653	0.876929	0.873568	0.832436	0.815892	0.78124	0.850269	0.771114	0.831176	0.749135
	5	0.888939	0.878138	0.908574	0.933979	0.887995	0.890182	0.959956	0.98684	0.871819	0.76951	0.794581	0.780632	0.728464	0.78698	0.79305	0.768613	0.713154
	6	0.852059	0.858685	0.901862	0.944897	0.933722	0.874862	0.867205	0.894582	0.791459	0.764815	0.78344	0.727994	0.787605	0.81967	0.784714	0.779718	0.774612
	7	0.84421	0.898759	0.911202	1.08904	1.10515	0.973825	0.814616		0.706118	0.725956	0.782987	0.708774	0.789417	0.794929	0.833619	0.845854	0.870362
	8	0.807526	0.869923	0.931073	1.18759	1.26263	1.10179	0.758393			0.728331	0.779162	0.739666	0.753353	0.804489	0.809498	0.819221	0.821149
	9	0.870237	0.875494	0.88245	1.0522	1.15508	1.01575	0.81207	0.807647	0.831027	0.781667	0.808591	0.804184	0.789639	0.833139	0.833091	0.871067	0.801926
	10	0.947541	1.0322	1.09327	0.970784	0.995094	0.907733	0.799393	0.808993	0.80154	0.87638	0.907862	0.884973	0.783692	0.796666	0.760801	0.772522	0.807192
	11	1.05312	1.09131	1.13564	1.06059	0.936307	0.824781	0.818588	0.807087	0.806498	0.913162	1.00251	0.99647	0.873198	0.749318	0.746551	0.775979	0.772234
	12	1.17956	1.26236	1.25879	1.06448	0.965017	0.802641	0.813899	0.834373	0.784684	0.820718	0.918772	0.862974	0.812596	0.828611	0.803413	0.834676	0.760965
	13	1.19581	1.44442	1.34074	1.18495	1.00437	0.863527	0.8211	0.811008	0.785835	0.729929	0.825624	0.816305	0.852954	0.880884	0.80393	0.84532	0.770327
	14		1.27944	1.33714	1.1562	0.944412	0.842462	0.811395	0.78001	0.754625	0.73296	0.796605	0.869318	0.898743	0.894253	0.901055	0.913562
	15			1.052	1.0073	0.86832	0.752975	0.838851	0.872958	0.839764	0.861563	0.874735	0.940559	1.01575	0.92806	0.932837
	16				0.909205	0.774617	0.717098	0.763662	0.837001	0.887175	0.917815	0.976347	0.981115	1.09292	1.00824
	17					0.730672	0.696124	0.745207	0.892548	0.931551	0.917454	0.94003	1.03107	1.08669
6	1					1.17642	1.13991	1.21051	1.01163	1.0374	1.0498	1.18049	1.15971	1.11671					6																		6
	2					1.09731	1.02826	1.04927	0.992251	0.902865	0.883662	1.05897	1.03655	1.10459	1.02413
	3			0.937681	1.01758	0.983362	0.941546	0.991603	0.877268	0.823586	0.855371	0.905004	0.932594	0.87271	0.850845	0.814193
	4		0.896881	0.939933	0.894085	0.942348	0.92336	0.913031	0.902383	0.857446	0.820051	0.961582	0.832991	0.813247	0.833276	0.832234	0.762077
	5	0.895591	0.919276	0.954643	0.934712	0.958165	0.977072	0.999966	0.988621	0.883	0.882889	0.894925	0.81377	0.852349	0.817945	0.854863	0.86178	0.787584
	6	0.893846	0.873583	0.974584	1.0406	1.05153	0.888794	0.94043	0.874646	0.821248	0.844899	0.87872	0.830656	0.842711	0.850592	0.891865	0.986339	0.898647
	7	0.949475	0.994353	1.0367	1.08104	1.14719	0.923544	0.820653		0.835472	0.796935	0.788374	0.772253	0.817005	0.817313	0.938595	0.972764	1.03122
	8	0.936436	1.01348	1.09258	1.14845	1.19977	1.10885	0.816104			0.790604	0.739278	0.749704	0.758814	0.79368	0.918775	0.881449	0.920711
	9	1.00775	1.06697	1.02306	1.08236	1.0861	0.962704	0.834719	0.789555	0.826311	0.784435	0.769197	0.748644	0.744212	0.787022	0.899774	0.847023	0.843209
	10	1.08034	0.994406	0.980901	1.06098	0.991466	0.902438	0.862753	0.852549	0.890523	0.910068	0.825598	0.865551	0.818934	0.828425	0.828339	0.799169	0.812464
	11	1.19329	1.23613	1.20412	1.08839	0.926058	0.843171	0.871294	0.877937	0.846892	0.896571	0.943328	0.90289	0.79896	0.779657	0.796282	0.813187	0.775852
	12	1.41806	1.45903	1.49562	1.29868	1.00058	0.839642	0.847117	0.861703	0.81961	0.874204	0.827069	0.869236	0.869945	0.815142	0.818659	0.782295	0.747688
	13	1.43835	1.65523	1.63327	1.37669	1.0916	0.928194	0.898319	0.864479	0.806918	0.817494	0.873548	0.805081	0.846803	0.866199	0.867007	0.853404	0.774071
	14		1.47045	1.42274	1.27767	0.981166	0.926205	0.862108	0.904396	0.814638	0.761466	0.851611	0.852448	0.885055	0.94551	0.923597	0.866143
	15			1.16857	1.05085	0.892063	0.869056	0.837499	0.909239	0.932393	0.855414	0.87799	0.945159	0.940785	0.973024	0.940844
	16				1.03053	0.833578	0.80845	0.824213	0.92979	0.93141	0.883567	0.949403	1.03601	1.02549	1.0345
	17					0.801925	0.793801	0.80744	0.879082	0.882539	0.873708	0.978437	1.06096	1.10633
7	1					1.19617	1.17864	1.12958	1.12054	1.12908	1.12332	1.23348	1.26336	1.17948					7																		7
	2					0.969907	1.05713	1.02073	0.990815	0.910611	0.977028	1.07794	1.15215	1.09524	1.03068
	3			0.984936	0.913651	0.991553	1.01758	1.04959	0.900168	0.868758	0.836429	0.916762	0.893248	0.905404	0.862196	0.79334
	4		0.982979	0.913963	0.87032	0.895714	0.875354	0.913952	0.90626	0.821593	0.693092	0.766804	0.79919	0.872836	0.787039	0.80643	0.715986
	5	0.869899	0.907563	0.934703	0.857592	0.891831	0.880987	0.830871	0.886075	0.796737	0.733962	0.784323	0.785783	0.867495	0.760225	0.809641	0.756931	0.74293
	6	0.839011	0.904222	0.967726	0.916438	0.963217	0.886737	0.829755	0.837645	0.802062	0.745854	0.795053	0.761776	0.866164	0.824963	0.818404	0.790817	0.763686
	7	0.836371	0.938831	0.988707	1.06761	1.12909	0.977668	0.877389		0.743481	0.713915	0.74813	0.751404	0.809549	0.836772	0.855303	0.866567	0.84725
	8	0.798256	0.89054	0.976881	1.14003	1.31696	1.0896	0.809933			0.697675	0.730796	0.673874	0.745459	0.788034	0.794215	0.857801	0.825201
	9	0.905581	0.946108	0.909499	1.01694	1.08822	1.02003	0.827361	0.822828	0.848468	0.738635	0.716997	0.711246	0.714351	0.812107	0.836082	0.868188	0.829205
	10	1.0276	0.995982	1.06623	0.969544	0.989604	0.880681	0.777769	0.827183	0.821627	0.812869	0.774395	0.794213	0.768622	0.795189	0.791009	0.806222	0.750155
	11	1.04249	1.22115	1.1911	1.04643	0.897205	0.792829	0.854531	0.812578	0.798725	0.881188	0.842063	0.857193	0.815316	0.817758	0.776605	0.789208	0.764166
	12	1.44059	1.42714	1.29223	1.07899	0.850739	0.804394	0.794244	0.7674	0.800882	0.781905	0.791374	0.791662	0.744994	0.829665	0.846181	0.776953	0.783364
	13	1.32954	1.40564	1.39422	1.24396	1.00544	0.914435	0.895891	0.869293	0.83116	0.748653	0.746345	0.742292	0.754562	0.809049	0.825684	0.847967	0.785991
	14		1.34892	1.35975	1.28451	1.05886	0.905305	0.849463	0.83275	0.815532	0.784476	0.848416	0.83671	0.851773	0.87767	0.896053	0.91162
	15			1.10969	1.08864	0.933708	0.82982	0.83218	0.87682	0.943508	0.892885	0.920157	0.999106	0.963221	0.979724	0.990595
	16				0.949427	0.791373	0.758769	0.798545	0.878468	0.975585	0.936901	0.995593	1.06615	1.04134	0.982849
	17					0.738275	0.69813	0.7702	0.874736	0.952996	0.925893	1.01692	1.18694	1.17995
8	1					1.06121	0.958172	1.11592	1.07743	1.01951	1.08281	1.16828	1.23076	1.12307					8																		8
	2					0.889129	0.922248	1.0296	0.887654	0.875005	0.897496	0.919976	1.027	1.01947	1.02609
	3			0.939902	0.86711	0.905839	0.919185	0.861039	0.842677	0.804205	0.840492	0.792553	0.84018	0.784698	0.784929	0.688901
	4		0.829408	0.858735	0.890062	0.82673	0.816835	0.816673	0.849526	0.818319	0.752076	0.719031	0.744805	0.754495	0.702751	0.699176	0.652411
	5	0.760479	0.825441	0.839094	0.834725	0.886481	0.856674	0.847516	0.924098	0.832363	0.683868	0.757932	0.753571	0.772666	0.721188	0.724179	0.713737	0.648302
	6	0.829562	0.808642	0.900557	0.968859	0.973264	0.908538	0.9326	0.894807	0.74834	0.691562	0.801112	0.705928	0.810087	0.772007	0.744661	0.73814	0.721067
	7	0.852448	0.83674	0.945573	1.04548	1.1463	1.01309	0.808947		0.776755	0.726356	0.746152	0.716845	0.728917	0.811026	0.79561	0.837437	0.851182
	8	0.851773	0.86669	0.981239	1.05876	1.17921	1.07658	0.846737			0.690586	0.699157	0.710362	0.68705	0.760919	0.837476	0.868532	0.851656
	9	0.852332	0.891561	0.941267	1.01734	1.08052	1.01668	0.885043	0.852031	0.852212	0.801233	0.800128	0.764479	0.74006	0.769341	0.826122	0.875872	0.849601
	10	1.04991	1.01959	1.0185	1.04168	0.950735	0.925847	0.879679	0.852456	0.876361	0.848572	0.867817	0.873084	0.772509	0.753845	0.753441	0.803472	0.811363
	11	1.10709	1.13382	1.03037	1.03645	0.936442	0.822514	0.847856	0.818945	0.804134	0.947671	0.975021	0.890069	0.861641	0.772626	0.792314	0.818986	0.785272
	12	1.3347	1.36516	1.31088	1.14771	0.933192	0.861227	0.805317	0.821353	0.765063	0.846201	0.877262	0.833151	0.800912	0.838415	0.866495	0.838415	0.825956
	13	1.34887	1.54983	1.44282	1.24814	1.02122	0.908088	0.839924	0.820519	0.793383	0.778207	0.791406	0.759849	0.764272	0.870479	0.924884	0.892442	0.804314
	14		1.31317	1.2469	1.1856	0.998053	0.847972	0.785427	0.872357	0.778632	0.707084	0.821025	0.813955	0.828629	0.91892	0.877231	0.914319
	15			1.00908	0.99339	0.866131	0.767953	0.767591	0.891796	0.826464	0.812403	0.882209	0.937416	0.94488	0.919843	0.896405
	16				0.895093	0.78037	0.751648	0.767886	0.888143	0.871541	0.858556	0.942745	0.999259	0.978373	0.937335
	17					0.724093	0.689242	0.715582	0.849099	0.92605	0.893713	0.969984	1.07762	1.03428
9	1					1.00272	1.05334	1.09867	1.05524	1.09006	1.13754	1.18664	1.14387	1.07051					9																		9
	2					0.937871	0.986829	0.987377	0.996928	0.903455	0.893516	0.964622	1.01215	0.972047	0.856052
	3			0.859308	0.92722	0.894491	0.915882	0.953872	0.858234	0.833379	0.796745	0.817449	0.819097	0.843697	0.78967	0.743826
	4		0.857749	0.900423	0.940434	0.840542	0.883413	0.851893	0.869589	0.82738	0.755469	0.753799	0.788112	0.747022	0.832232	0.792153	0.737784
	5	0.785332	0.810838	0.861004	0.907029	0.963152	0.89732	0.89368	0.859045	0.842806	0.715902	0.714657	0.717943	0.7337	0.794645	0.830762	0.813809	0.7942
	6	0.776812	0.849235	0.919565	1.0233	1.0425	0.885589	0.854859	0.875989	0.765272	0.74565	0.736933	0.704192	0.792417	0.827347	0.812788	0.81831	0.802445
	7	0.831243	0.886977	0.937383	1.12459	1.1716	1.00868	0.866904		0.729765	0.691546	0.727355	0.696426	0.811429	0.852396	0.891038	0.909267	0.907664
	8	0.780322	0.833189	0.934853	1.14524	1.2748	1.09822	0.814477			0.697079	0.716572	0.70841	0.714516	0.797636	0.850815	0.874213	0.902256
	9	0.777969	0.81078	0.874604	1.12666	1.1467	0.976666	0.826895	0.805517	0.836865	0.730904	0.752335	0.739184	0.714557	0.83605	0.839297	0.8586	0.846536
	10	0.869924	0.91343	0.935837	0.971179	0.978536	0.892383	0.824169	0.788233	0.800892	0.828499	0.767705	0.829484	0.758797	0.766499	0.756579	0.806289	0.791022
	11	1.01442	1.06582	1.07571	1.03034	0.94451	0.828483	0.840247	0.747028	0.739737	0.804869	0.84015	0.868981	0.841697	0.771838	0.77515	0.774928	0.760868
	12	1.33667	1.25534	1.35719	1.10384	0.948338	0.828557	0.797752	0.811795	0.730634	0.777951	0.849748	0.796953	0.798506	0.823484	0.78814	0.744008	0.771141
	13	1.31297	1.3759	1.32879	1.26239	1.05012	0.866234	0.871912	0.896117	0.763644	0.707604	0.766588	0.8031	0.86171	0.820321	0.841777	0.773237	0.762569
	14		1.3256	1.35739	1.1975	1.01426	0.866822	0.844609	0.822434	0.791556	0.742906	0.808879	0.848234	0.83689	0.845063	0.872882	0.846173
	15			1.06225	0.97729	0.855516	0.772979	0.794811	0.884022	0.938199	0.901902	0.968746	1.01342	0.964319	0.957676	0.876932
	16				0.882465	0.780847	0.724788	0.773352	0.935507	0.882919	0.903814	1.04927	1.0346	1.01147	0.946357
	17					0.72287	0.676301	0.739558	0.907624	0.920925	0.897371	0.988399	1.05532	1.04196
10	1					1.10362	1.17616	1.11176	1.06838	1.02263	1.14104	1.18004	1.13646	1.12929					10																		10
	2					0.917395	1.02467	1.0056	1.00461	0.975261	0.987151	0.963294	1.04392	0.943732	0.93017
	3			0.998633	0.965842	0.927705	0.911446	0.976372	0.93046	0.915208	0.880099	0.878907	0.88016	0.811228	0.754679	0.748271
	4		0.923434	0.949042	0.914921	0.905741	0.868737	0.881193	0.93146	0.837443	0.805144	0.819192	0.790025	0.779781	0.685435	0.757048	0.705712
	5	0.85234	0.855634	0.901641	0.92465	0.958201	0.932847	0.859833	0.963353	0.857324	0.725149	0.81886	0.749719	0.749515	0.715907	0.776366	0.759295	0.750894
	6	0.796356	0.849985	0.885776	0.922834	0.981284	0.858504	0.876485	0.860797	0.789253	0.737257	0.736819	0.700814	0.751534	0.784412	0.778371	0.806493	0.765651
	7	0.830521	0.878473	0.845849	0.992055	1.11763	0.965738	0.79877		0.823761	0.732925	0.736334	0.714375	0.779461	0.819871	0.86989	0.871836	0.860147
	8	0.776812	0.83785	0.876551	1.10319	1.24279	1.10289	0.871595			0.760566	0.77726	0.704359	0.750043	0.787951	0.823672	0.860018	0.85913
	9	0.798774	0.932988	0.951664	1.02806	1.10758	0.95688	0.865161	0.833929	0.825298	0.843934	0.857474	0.757371	0.737693	0.792346	0.778572	0.759476	0.832702
	10	0.865244	0.909121	0.947707	0.996555	0.978709	0.866223	0.806701	0.779334	0.863374	0.884125	0.938265	0.864007	0.772693	0.76327	0.752198	0.759251	0.786301
	11	0.952962	1.0818	1.09102	0.955671	0.905325	0.805993	0.885417	0.7782	0.791243	0.883134	0.918555	0.93144	0.793461	0.740298	0.741965	0.764223	0.747528
	12	1.29008	1.22278	1.26098	1.03567	0.92307	0.837268	0.82652	0.790049	0.735323	0.811601	0.852626	0.83996	0.842165	0.791805	0.780864	0.751051	0.746373
	13	1.28395	1.3532	1.30526	1.15006	1.00867	0.897171	0.870162	0.83187	0.760501	0.737745	0.816038	0.816522	0.800405	0.787585	0.816778	0.82711	0.770027
	14		1.18718	1.2693	1.09198	0.91382	0.796337	0.789957	0.81172	0.739056	0.727806	0.80778	0.854321	0.876488	0.889271	0.926838	0.895794
	15			1.00807	0.871585	0.781514	0.718984	0.776014	0.91827	0.905181	0.857903	0.928624	1.00442	1.0184	0.941434	0.91002
	16				0.809208	0.747338	0.684938	0.737266	0.93211	0.959302	0.934775	0.995104	1.08236	1.06478	1.00663
	17					0.694788	0.656464	0.697493	0.909866	0.947582	0.909218	1.01807	1.08917	1.15734

## Sheet: Pref
Preferentiality
Signals of insufficient quality were excluded from the property maps. Signals could be rejected based on noise low amplitude, large artefact or ventricluar farfields that could not be substracted.
		1	2	3	4	5	6	7	8	9	10	11	12	13	14	15	16	17
1	1					1.02171	0.933543	1.06706	1.15664	1.65526	1.80779	1.54965	1.24297	1.10884					1																		1
	2					1.13881	0.999352	1.10818	1.05663	2.86392	2.54954	1.67283	1.18716	1.05567	0.652554
	3			1.50866	1.44187	1.17368	1.24965	1.42343	2.20145	2.52278	2.40982	1.96576	0.965736	0.763029	0.545028	1.66296
	4		1.6712	1.7614	1.58662	1.46708	1.92144	1.96711	2.46878	2.79708	2.79954	2.4718	0.233723	0.629444	0.0760519	0.922629	1.61377
	5	1.58503	1.53829	1.59057	1.68419	2.13176	2.26202	2.36159	2.5822	2.85354	2.93802	2.62067	2.69588	2.70286	2.48268	2.01676	1.22274	1.62477
	6	2.71385	2.35147	1.86315	1.71713	2.35483	2.30219	2.4235	0.0170284	2.99348	2.89409	2.67961	2.64556	2.60974	2.79831	2.62271	1.66651	1.38074
	7	0.104949	2.77829	2.91022	2.98653	2.63236	2.45071	2.84505		0.805619	2.72649	2.38757	2.39311	2.62986	2.72119	2.749	2.81278	2.48333
	8	0.0190029	2.76104	2.85929	2.86119	2.75061	2.95059	0.368797			1.91727	2.03059	2.19604	2.20831	2.77142	2.60266	2.75321	2.86433
	9	2.80413	2.54453	2.71304	2.62879	2.14441	1.25394	0.691484	1.47718	1.49136	1.82179	2.07403	1.90852	2.31647	2.9644	1.48347	1.30003	0.848335
	10	1.9074	1.69076	1.9687	1.94477	1.44498	1.17764	1.15132	1.91227	2.16384	2.38461	2.65859	3.07515	2.09589	1.02915	1.0822	1.14078	1.34222
	11	1.33474	1.59776	1.79866	1.77343	1.38942	1.32743	1.5525	2.16168	2.47298	2.53523	2.89574	0.420661	0.597941	1.09186	1.1849	1.57961	1.62386
	12	1.58541	1.41717	1.92641	2.37557	1.95374	1.61243	1.61296	1.96016	2.52543	2.33051	1.62044	1.2241	0.898452	1.11897	1.36603	1.60253	1.81328
	13	1.91942	0.983948	2.88853	3.03867	0.034798	0.385563	1.30186	1.63786	2.14159	2.12293	1.5934	1.40508	1.2418	1.20999	1.18057	1.47083	1.01149
	14		1.62499	1.40792	0.673868	0.461189	0.55067	0.848102	1.06638	1.11685	1.40783	1.71349	1.56169	1.39221	1.26467	1.14542	1.25843
	15			1.52395	1.14157	0.81387	0.748547	0.882555	1.04464	1.15866	2.97988	2.11335	1.92234	1.52285	1.43278	1.27384
	16				1.16259	0.943372	0.800885	0.891991	1.03831	1.03997	0.280181	2.57415	2.29977	1.97452	1.68682
	17					0.987698	0.897443	1.03111	1.15185	1.25255	0.44817	2.64725	2.65799	2.7195
2	1					0.887192	0.883127	0.614121	0.740533	1.02172	1.56187	1.45859	1.35094	1.22263					2																		2
	2					1.18987	0.929439	0.583239	0.521586	0.216005	0.688904	1.50583	1.42053	0.95533	0.920487
	3			1.34218	1.12641	1.12008	0.969933	1.65883	1.51285	0.00890631	0.931683	1.33015	0.817756	0.638902	0.950308	1.33441
	4		1.57955	1.46782	1.34592	1.03758	1.41422	2.03262	1.89261	2.83066	1.06088	2.60147	2.85694	0.218229	2.14493	1.25966	1.51233
	5	1.44348	1.65139	1.50798	1.34377	2.09401	2.29507	2.28913	2.15329	0.0463929	2.95793	2.74316	2.51869	2.6279	2.61887	1.8199	1.268	1.46563
	6	2.19687	2.02628	2.09828	1.80228	2.20202	2.37834	2.48702	2.4745	3.02349	2.75429	2.56317	2.5133	2.5943	2.77045	2.11196	1.69552	1.40128
	7	2.21402	2.64364	2.68237	2.30551	2.61027	2.61031	2.80531		1.56252	1.79804	2.09827	2.0032	2.38349	2.60652	2.28859	2.7378	1.78229
	8	2.72557	2.72882	2.7124	2.89259	2.60002	2.75601	2.95173			1.59789	1.84792	1.9295	2.06247	2.30822	1.56162	1.01777	0.957697
	9	2.59325	2.39243	2.636	2.73618	2.8608	0.984889	0.634836	0.789903	1.15012	1.54178	1.77049	1.84509	1.85797	2.0102	0.923819	1.22083	0.941392
	10	1.34913	1.6242	1.86851	1.79662	1.09382	1.15228	1.11918	1.53619	2.10774	2.04499	2.03591	1.79653	1.68782	1.35241	1.00682	1.28895	1.26296
	11	1.19169	1.48529	1.5223	1.29793	1.15595	1.16417	1.38447	2.10279	2.33401	2.49094	2.39978	1.40919	1.21439	0.990181	1.16505	1.28347	1.5147
	12	1.42865	1.41659	1.47028	1.1129	0.960844	1.11356	1.46639	1.8544	2.19805	2.0497	1.79479	1.40903	1.08248	1.27439	1.34904	1.42142	1.58861
	13	1.41397	1.52315	1.43481	0.44438	0.532989	0.704379	1.27897	1.56214	1.84205	1.84024	1.63994	1.56677	1.38005	1.37022	1.33211	1.47377	1.1893
	14		2.38501	1.68158	0.755209	0.48562	0.597363	1.11578	1.40351	1.55478	1.74018	1.75939	1.71684	1.54518	1.46047	1.23684	1.40736
	15			1.75374	0.981137	0.692831	0.616775	0.902427	1.23966	1.49797	1.90315	1.88913	1.89411	1.65733	1.52041	1.42973
	16				1.06839	0.861667	0.603023	0.906611	1.24753	1.41074	2.00003	2.24021	2.19668	2.09567	1.78954
	17					0.878963	0.902268	1.10364	1.41439	1.53783	1.76831	2.15426	2.12998	2.12388
3	1					1.374	1.09351	0.970598	1.07429	1.32364	1.42206	1.38065	1.23178	1.37625					3																		3
	2					1.3641	0.946538	1.21184	0.352424	2.65681	0.0423067	1.58745	1.11794	0.701555	0.168422
	3			1.48519	1.53019	1.29036	0.766964	1.62828	2.43929	2.46174	1.52136	1.77575	0.642986	0.6281	0.960909	1.39214
	4		1.89715	1.64769	1.69447	1.6371	2.25091	2.38891	2.69301	2.72422	2.70943	2.25979	2.04884	0.360923	0.835571	1.11239	1.74099
	5	1.64628	1.76962	1.70191	1.76511	2.26181	2.30679	2.61837	2.80263	2.97978	2.88021	2.54433	2.47767	2.70069	2.51464	1.61501	1.59315	1.43516
	6	2.24377	2.4604	2.66937	2.69933	2.34829	2.38994	2.48223	2.67529	0.0421946	2.92138	2.51534	2.59931	2.53788	2.80474	2.10685	1.77244	1.36461
	7	2.9015	2.43082	2.77204	2.81478	2.51165	2.45533	2.39561		0.9004	1.46491	1.64381	2.22972	2.40392	2.59777	2.70764	2.65648	0.338425
	8	2.72232	2.74633	2.85314	2.90161	2.91106	2.84934	2.78946			1.47627	1.4437	1.87345	2.0012	2.11082	2.52935	0.187748	0.313404
	9	2.81371	2.48989	2.55087	2.69332	0.725094	0.767467	0.58178	0.973943	1.18212	1.33796	1.58101	1.74601	1.76603	1.78152	1.6938	1.35316	0.684147
	10	0.902875	1.35247	1.5195	1.85763	1.08332	0.953219	1.06968	1.61034	2.218	0.697729	0.301353	1.24589	1.35432	1.46253	1.58023	1.41829	1.24008
	11	0.974606	1.28706	1.2966	1.63095	1.254	1.14592	1.28595	2.02527	2.46937	2.52014	0.254838	1.04504	1.27311	1.34629	1.42194	1.56767	1.68465
	12	1.55445	1.36952	1.07633	0.34636	0.446062	1.13366	1.45357	1.78188	2.19695	2.10054	1.4415	1.40555	1.27463	1.37276	1.51145	1.52189	1.75902
	13	2.38404	0.371119	0.869239	0.441912	0.261065	0.514059	1.34669	1.61226	1.78492	1.85084	1.56683	1.50087	1.44807	1.44788	1.39407	1.38762	1.09148
	14		2.48548	1.14597	0.739413	0.497318	0.575551	0.921804	1.31305	1.54219	1.64999	1.7156	1.67673	1.63947	1.4544	1.32605	1.31146
	15			1.38291	1.08922	0.76237	0.72102	0.889478	1.18453	1.51457	1.81555	1.85556	1.754	1.71549	1.60743	1.43041
	16				1.16297	0.981817	0.817879	0.930096	1.21848	1.39273	1.70232	2.0589	1.96929	1.90071	1.82374
	17					1.08644	0.991112	1.10116	1.33679	1.51667	1.9232	2.0313	1.89501	1.82918
4	1					1.21508	1.10928	1.08816	1.28285	1.75035	1.77356	1.47027	1.39873	1.15209					4																		4
	2					1.21954	0.969977	0.225851	1.02138	2.85897	2.56854	1.69042	1.22366	0.764067	0.862092
	3			1.6015	1.14028	1.16002	1.16136	2.09411	2.20327	2.38763	1.89463	1.66193	0.849175	0.76895	0.856294	1.47171
	4		1.74179	1.76898	1.54475	1.44567	1.59655	2.1872	2.4561	2.48851	2.77913	2.1685	0.733593	0.63737	0.719515	1.02747	1.56524
	5	1.79571	1.76684	1.73733	1.5818	1.98598	2.22574	2.43245	2.76011	0.102826	2.71157	2.38764	2.52874	3.11338	3.08772	1.16853	1.16077	1.32586
	6	2.42413	2.28497	2.16301	1.91109	2.0166	2.29923	2.5915	3.0084	3.13746	2.75453	2.36111	2.61598	2.78812	2.86433	1.16699	1.3363	1.29301
	7	2.65917	2.44965	2.72853	2.60665	2.39919	2.49197	2.63459		1.34284	1.25131	1.96959	2.20693	2.24451	2.65779	2.76535	0.458686	0.564817
	8	2.37305	2.40571	2.729	2.77432	2.91406	2.91306	3.03423			1.60147	1.82617	1.87696	1.78105	2.16346	1.87932	0.738392	0.521558
	9	1.5981	1.99987	2.39522	2.63622	2.34504	0.762485	0.530196	1.48792	1.62036	1.553	1.71008	1.89599	1.64235	1.78443	1.13717	1.54685	0.669127
	10	1.23604	1.50624	1.63609	1.96298	1.20163	1.07758	1.26863	1.78939	1.97702	2.14709	2.07441	1.27566	1.40726	1.3447	1.24331	1.46336	1.49011
	11	1.09968	1.43647	1.43174	1.80172	1.37527	1.21701	1.44948	2.02337	2.32619	2.44837	2.15975	0.939016	0.906292	1.14593	1.27099	1.59723	1.82893
	12	1.09867	1.20285	1.5386	2.2516	1.71035	1.19722	1.46051	1.75139	2.14001	2.26815	1.7789	1.23147	1.07635	1.2656	1.38758	1.45888	1.79201
	13	1.03778	1.01985	1.34405	0.204912	0.0762727	0.523852	1.31215	1.49627	1.84362	1.98718	1.66753	1.38497	1.26572	1.32085	1.25452	1.31293	0.879974
	14		1.72745	1.30117	0.828653	0.507706	0.493095	0.984867	1.2811	1.67805	1.93046	1.7959	1.63548	1.50148	1.38991	1.27599	1.30832
	15			1.44494	1.10266	0.811322	0.69553	0.898067	1.18677	1.50379	1.93473	1.94464	1.83954	1.69024	1.59697	1.43693
	16				1.30354	1.02648	0.853737	0.887035	1.08847	1.39188	2.09712	2.2335	2.13122	2.14178	1.90743
	17					1.02353	0.975872	1.07056	1.36851	1.58536	2.0493	2.19202	2.15881	2.2432
5	1					1.11612	0.905533	0.821284	0.985916	1.20329	1.45994	1.47341	1.20951	0.88373					5																		5
	2					1.23551	0.907144	0.948754	0.771355	0.163483	0.229373	1.37557	0.983252	0.600357	0.1568
	3			1.47408	1.3827	1.4213	1.12884	1.1979	0.816153	0.123646	0.0314759	1.78689	0.442073	0.518587	0.415055	1.97353
	4		1.75832	1.64008	1.57834	1.46095	1.16459	1.88048	1.12417	0.0299816	3.01965	2.45526	3.01422	0.353815	0.391632	1.47338	1.94562
	5	0.536791	1.65017	1.68577	1.58008	2.20881	2.59517	2.40746	2.85847	3.04065	2.96284	2.55693	2.75066	2.93477	2.84148	1.93451	1.74387	1.68465
	6	2.77363	2.98925	2.24867	2.10179	2.30578	2.42575	2.41219	2.73535	3.00273	2.93339	2.67634	2.68915	2.74369	2.88589	2.77837	2.04805	1.65888
	7	2.70948	2.75365	2.86497	2.87375	2.68469	2.708	2.78154		1.35375	1.48238	1.65486	2.59222	2.59023	2.69786	2.81012	3.07695	2.71425
	8	2.46476	2.61358	2.82318	2.78741	2.87661	2.96229	3.09305			1.33276	1.62644	2.24818	2.35437	2.52068	2.92433	0.29418	0.199734
	9	2.1844	2.52048	2.55573	2.55292	2.93446	0.794076	0.520978	1.24079	1.23959	1.38834	1.58135	2.0931	1.92096	0.689431	1.04847	0.714753	0.530833
	10	1.01831	1.6953	1.92617	2.16761	1.70953	1.27145	1.1406	1.8723	2.22898	1.04778	0.772414	2.13153	1.4095	1.75492	0.947439	1.0416	1.09297
	11	1.01984	1.41594	1.66655	1.46169	1.24058	1.29593	1.28708	1.92469	2.45035	2.8593	0.278832	2.95357	0.83029	0.945469	0.932439	1.23706	1.2718
	12	1.60846	1.51461	1.44866	1.28802	1.08404	1.19622	1.43322	1.75678	2.11527	2.37469	1.22192	1.15893	0.90657	1.18644	1.11435	1.37525	1.36967
	13	1.54343	1.33832	1.15685	1.01653	0.555125	0.718801	1.23538	1.4854	1.77034	2.06621	1.57278	1.49469	1.33293	1.56805	1.31945	1.37614	1.00943
	14		1.66701	1.31769	0.701073	0.537012	0.590066	1.04765	1.31386	1.5451	1.84892	1.76869	1.70728	1.64345	1.54296	1.30268	1.27442
	15			1.58163	1.03287	0.658935	0.623464	0.900603	1.19339	1.44611	2.13309	2.17675	1.94835	1.82792	1.6959	1.45533
	16				1.0708	0.889314	0.745417	0.822563	1.15318	1.4604	2.16287	2.42495	2.30094	2.10648	2.0331
	17					0.970914	0.9175	1.04166	1.2976	1.69881	2.34251	2.47166	2.24534	2.12418
6	1					1.26409	1.1259	1.14109	1.02799	1.35618	1.58278	1.45975	1.31664	1.27126					6																		6
	2					1.25409	1.07175	0.410154	0.812175	2.9326	2.26126	1.36524	1.25523	1.1698	0.964423
	3			1.36148	1.43734	1.45471	0.985721	2.22216	2.24163	2.66964	2.56153	1.5366	0.486442	0.464266	0.652668	1.29848
	4		1.73273	1.44926	1.41105	1.5331	1.8322	2.45175	2.72738	2.79301	3.09054	2.58063	2.97866	3.13978	0.255523	1.00274	1.72341
	5	1.37078	1.87297	1.71429	1.56535	1.77682	2.44116	2.59542	2.72554	2.94886	3.03958	2.59323	2.76618	2.7274	2.99576	1.33117	1.4634	1.36417
	6	2.86428	2.56392	1.889	1.7497	2.01716	2.46999	2.44181	2.82891	2.99229	2.88548	2.69573	2.72347	2.76707	2.85659	2.76566	2.79008	0.731842
	7	2.72376	3.03179	2.95207	2.75488	2.39544	2.55627	2.51192		0.885977	2.86765	2.43324	2.48207	2.47965	2.74077	2.96093	0.646846	0.464743
	8	2.623	2.82942	2.9711	2.78136	2.77701	2.72793	2.97299			1.67388	1.78945	2.20835	2.13792	2.61479	0.808669	0.934334	0.836524
	9	0.725875	2.76204	2.68365	2.61038	0.999193	1.09375	1.00564	1.03821	1.29458	1.40937	1.89124	2.11084	2.02389	1.80877	1.3923	1.18472	0.97785
	10	1.46705	1.69938	1.88363	2.19323	1.29616	1.14491	1.04188	1.44364	1.84405	1.50451	3.03191	2.1937	1.93359	1.37428	1.35871	1.21143	1.34751
	11	1.11015	1.33489	1.5372	1.8601	1.14567	1.28473	1.37902	1.96332	2.32607	3.11338	0.0021426	1.05522	1.31721	1.44429	1.28123	1.62514	1.70865
	12	1.45857	1.28999	1.27263	1.38948	2.82433	1.42565	1.48473	1.70832	1.92396	2.6205	1.93319	1.44823	1.24701	1.5879	1.50098	1.55198	1.73391
	13	1.22375	1.55503	1.26877	0.70631	0.503419	0.654811	1.22699	1.47233	1.75603	2.10389	1.73584	1.73635	1.56043	1.57463	1.32452	1.33298	0.607657
	14		1.96613	1.51685	1.19642	0.593925	0.599616	1.04561	1.36404	1.58928	1.9101	1.94277	1.89655	1.74469	1.52934	1.16293	1.07604
	15			1.61804	1.28588	0.911151	0.677815	0.853821	1.29682	1.49445	2.32404	2.28543	2.24173	1.95214	1.65165	1.2724
	16				1.30999	1.0197	0.898021	0.940706	1.32113	1.30952	2.44848	2.51772	2.56709	2.54015	2.3176
	17					0.935249	1.04652	1.09637	1.41381	1.57499	2.44538	2.51454	2.69455	3.08367
7	1					1.00291	1.03548	0.832179	1.0249	1.38882	1.65539	1.56455	1.32126	1.24074					7																		7
	2					1.04076	0.88413	0.771239	0.986039	3.00972	2.2219	1.75458	1.24536	1.0649	0.555962
	3			1.7822	1.49287	0.909066	1.08368	0.708648	2.96056	2.82706	2.54704	1.85681	1.22333	0.986932	0.924474	1.27286
	4		1.81101	1.62745	1.90594	1.34684	1.623	2.35113	2.64082	2.73825	3.03693	2.77036	0.0588133	0.858183	0.734251	0.803231	1.47538
	5	1.42739	1.67912	1.74488	1.75156	0.483245	2.09392	2.55697	2.53729	3.04516	3.00214	2.70538	2.88173	2.95534	0.220705	0.589252	1.09674	1.29735
	6	2.80265	2.61523	2.00729	3.00667	2.21174	2.35983	2.50273	2.50498	2.9021	2.95697	2.72719	2.91433	2.778	3.02652	0.327027	0.675251	1.11254
	7	2.77181	2.62043	0.00932169	2.82421	2.69037	2.70908	2.76199		0.922647	0.683009	1.32017	2.67632	2.27042	2.54404	0.0241608	0.113276	0.507958
	8	2.94437	2.08018	2.90097	2.90164	2.70893	2.81385	2.83901			0.935017	1.40337	1.8974	1.93947	2.17112	0.804568	0.360316	0.43586
	9	1.56243	1.81594	2.421	2.73031	0.321195	0.833942	0.345203	1.28293	1.17509	1.11711	1.24283	1.8713	1.67919	1.98614	1.31814	1.03114	0.637859
	10	1.23752	1.44084	1.64737	1.68548	0.801962	1.04104	0.978525	1.93562	2.55966	0.22419	0.101077	1.12329	1.71491	1.66818	1.60744	1.46679	1.21853
	11	1.09153	1.24727	1.28407	1.15216	0.881591	0.974447	1.18079	2.42491	2.61053	2.91031	3.10323	1.22173	1.28933	1.51634	1.35529	1.54792	1.61521
	12	1.05526	1.18968	1.42019	0.979545	0.97114	1.01482	1.37667	1.78132	2.24085	2.28005	1.6199	1.42551	1.45161	1.53082	1.43811	1.45697	1.71161
	13	1.40834	1.03567	1.09353	0.351124	0.426673	0.536857	1.03671	1.51355	1.89547	1.89324	1.76723	1.57016	1.61521	1.57883	1.38574	1.41988	0.582996
	14		2.04645	1.40174	0.687417	0.494934	0.545386	0.888382	1.29141	1.47355	1.70022	1.70241	1.75404	1.65042	1.54645	1.41424	1.32814
	15			1.67865	1.08589	0.640217	0.625568	0.877063	1.15174	1.54386	1.81129	2.02074	1.86355	1.75288	1.6694	1.51745
	16				1.1566	0.885756	0.823659	0.969505	1.23692	1.39688	1.80287	2.1608	2.12636	2.02455	1.89302
	17					0.897416	0.850222	1.13849	1.3564	1.58971	1.83612	2.20583	2.20835	2.27702
8	1					1.06581	1.08696	1.16969	1.12471	1.66975	1.27617	1.50641	1.27731	1.01391					8																		8
	2					0.956424	0.856606	0.91439	2.27378	3.03615	3.10892	1.64569	0.89164	0.967476	0.053991
	3			1.58167	1.21256	0.890985	0.911375	1.07379	2.13758	2.79957	3.08379	1.80523	0.775977	0.770809	3.11353	1.99758
	4		1.79685	1.56139	1.51721	1.04773	1.42885	1.89709	2.50526	2.72415	2.94877	2.5165	3.12299	0.25662	2.79665	1.71723	1.94627
	5	1.53708	1.78052	1.69003	1.43702	1.59557	2.22322	2.47228	2.82628	3.08155	2.89308	2.75136	2.81506	2.47469	2.54659	2.2358	1.82224	1.71057
	6	2.60197	2.19507	2.03162	1.89809	2.27944	2.35452	2.47531	2.95644	0.215852	2.74046	2.60236	2.58506	2.70852	2.79796	2.59285	1.98683	1.65488
	7	2.6768	2.48578	2.74884	2.89659	2.59124	2.47713	2.6987		1.18302	2.11497	2.06327	2.50031	2.39302	2.71413	2.7939	2.82718	2.72259
	8	2.86144	2.76403	2.84112	2.7184	2.59693	2.85177	3.02806			1.55789	1.99197	2.20542	2.19542	2.65518	2.79815	0.0148966	0.176044
	9	2.38877	2.27809	2.69809	2.55967	0.98669	1.00995	0.59909	0.580662	1.59522	1.5275	2.08045	2.22584	2.03738	1.50514	0.408778	0.113664	0.37237
	10	1.14095	1.4398	1.64811	2.01523	1.23249	1.17082	0.991266	1.90309	2.06643	2.27537	2.92952	2.22129	1.56407	1.17397	0.973013	1.31843	0.821098
	11	0.868816	1.25496	1.33205	1.42644	1.35435	1.22648	1.43785	2.09139	2.28694	2.47258	0.124031	0.581934	0.966234	1.16031	1.0688	1.39014	1.96658
	12	1.41428	1.14324	1.24961	1.06796	1.01601	1.17914	1.5262	1.91378	2.0946	2.09292	1.40759	1.21663	1.19613	1.2411	1.3324	1.40454	0.689783
	13	1.275	0.843907	1.00665	0.725106	0.439929	0.659814	1.34473	1.60243	1.84743	1.92349	1.59825	1.47516	1.45252	1.55937	1.36795	1.28203	0.777431
	14		1.86605	1.43819	0.989308	0.532194	0.598105	1.04297	1.41808	1.63209	1.65712	1.67727	1.63349	1.5659	1.4808	1.31997	1.26208
	15			1.69345	1.32633	0.898943	0.706135	0.93197	1.31209	1.52645	1.82889	1.92674	1.795	1.6441	1.56914	1.26571
	16				1.44682	1.18922	0.958607	1.0208	1.35465	1.5172	1.79741	2.04251	1.9851	2.02458	2.46427
	17					1.30578	1.11679	1.17506	1.477	1.61779	1.96853	2.19104	2.03792	1.98141
9	1					1.28547	1.08308	0.976245	1.13379	1.36336	1.30585	1.36546	1.27168	1.21696					9																		9
	2					1.36747	1.07312	0.57506	0.833127	0.316798	1.02495	1.31206	1.26506	1.12812	1.09925
	3			1.66036	1.38109	1.36234	1.1982	1.49306	3.03551	3.09581	1.25959	1.61134	1.0021	0.962051	0.963895	2.53316
	4		1.6606	1.56421	1.57074	1.49288	1.53179	2.2514	2.91057	0.0367086	3.12517	2.66492	2.82089	0.774954	0.81758	0.709346	2.16061
	5	1.14873	1.62343	1.46934	1.44086	1.92455	2.11723	2.23274	2.87098	3.09599	3.11651	2.79519	2.7134	3.04856	0.133139	0.298328	2.0045	1.52849
	6	0.123109	0.341781	1.18971	1.5108	2.23353	2.40368	2.56136	2.99991	0.097019	3.03055	2.74016	2.76377	2.83671	3.1205	3.14109	2.53744	0.825916
	7	3.1112	3.13625	3.07751	2.9336	2.30872	2.62456	2.85102		0.546527	0.338732	2.53635	2.6055	2.7598	2.88417	2.90401	2.95501	2.71441
	8	0.2033	3.1145	2.97874	2.77033	2.58219	2.76824	3.03663			1.09378	2.13836	2.25372	2.26287	2.0303	2.85275	2.7193	2.79015
	9	2.88226	2.3375	2.64456	2.4845	1.40761	1.00843	0.964115	1.49127	1.33435	1.32295	1.33586	1.89793	1.93393	1.41914	1.15638	1.11491	3.03258
	10	1.62049	1.54436	1.69722	1.77626	1.40377	1.11102	1.15834	1.56682	1.71561	1.13274	0.152971	0.497764	1.38827	1.30095	1.15661	1.22294	0.710884
	11	0.826285	1.48878	1.47745	1.67471	1.47828	1.33559	1.41281	1.8047	2.10414	2.33618	0.398695	0.788164	0.891381	1.09887	1.11075	1.2626	0.708493
	12	1.4681	1.27695	1.45509	1.41603	1.21695	1.14983	1.38128	1.61836	1.86873	2.00543	1.0725	1.11788	1.0956	1.30478	1.1708	1.20299	0.812022
	13	0.797081	0.0102748	2.25852	0.581995	0.567432	0.768368	1.26591	1.46956	1.70986	1.51979	1.32973	1.40102	1.34639	1.26561	1.12387	1.07323	0.77458
	14		2.32029	1.65514	0.838961	0.60432	0.608563	1.05226	1.31899	1.46266	1.45779	1.40946	1.55674	1.47707	1.29624	1.02689	0.856337
	15			1.58178	1.16201	0.870594	0.752884	1.0499	1.2483	1.59315	1.89233	2.2006	1.85706	1.81261	1.73338	0.965562
	16				1.22621	1.07276	0.883973	1.01074	1.21788	1.42923	1.78163	2.63313	2.62539	2.5779	2.64838
	17					1.13798	0.995568	1.12576	1.35248	1.61815	2.02836	2.39475	2.55448	3.13405
10	1					1.14378	1.02334	1.0117	0.968464	1.3134	1.43339	1.47001	1.33827	0.973148					10																		10
	2					1.3344	1.00534	0.994037	0.784	0.991433	1.58592	1.47015	1.26446	0.818566	0.393304
	3			1.6056	1.53497	1.57218	1.1683	1.10436	0.303249	2.63722	2.50765	1.86629	1.31275	0.758736	0.551629	0.833321
	4		1.63245	1.50656	1.58335	1.55161	1.28942	2.19307	2.80052	2.88338	2.95986	2.66006	2.73566	0.721323	0.283503	0.668929	1.49923
	5	1.1197	1.45183	1.49275	1.38048	1.6894	2.32062	2.73082	2.70959	2.94097	2.86956	2.53313	2.59918	2.75733	2.9469	0.382674	0.660761	1.20101
	6	0.0465148	0.391441	1.23695	0.804744	2.01066	2.45085	2.58908	2.39664	3.02954	2.90069	2.58827	2.697	2.72374	2.7838	2.84222	0.376628	1.24426
	7	2.91079	0.00694615	3.13468	0.073478	2.51751	2.64517	2.5972		0.923799	0.483453	1.84759	2.19371	2.32036	2.63157	2.76289	3.02418	0.00649794
	8	2.91729	3.06262	2.973	2.90981	2.89588	3.12044	2.97461			1.70948	1.75235	2.11612	2.12653	2.28938	2.55617	0.312474	0.490395
	9	3.06655	2.94382	2.92361	2.81979	0.890593	0.966753	0.937741	0.354361	1.14209	1.50411	1.66188	2.08572	1.97319	1.76608	1.25197	0.889854	0.357909
	10	0.997289	1.29042	1.64815	2.03483	1.19531	1.09457	1.12498	1.93526	2.03442	1.97721	2.08116	1.85559	1.77266	1.44815	0.905749	1.02523	1.03255
	11	0.680348	1.23948	1.30508	1.55118	1.32356	1.13587	1.33075	2.02514	2.22789	2.43191	2.47837	1.27952	1.14632	1.21437	1.06608	1.20647	1.23716
	12	1.15882	1.0237	1.26799	0.724158	1.0054	1.11694	1.46958	1.69413	1.998	2.21047	2.00787	1.44889	1.10389	1.37717	1.18572	1.29184	1.22045
	13	2.13798	0.445222	1.44099	0.234708	0.192033	0.602365	1.42664	1.62789	1.74274	1.88298	1.83858	1.65779	1.60575	1.35524	1.21339	1.20988	0.866981
	14		2.60944	2.17211	0.342373	0.431471	0.596795	1.13704	1.41904	1.6254	1.83758	1.8507	1.88257	1.69698	1.53127	1.28451	1.21192
	15			2.05516	0.630915	0.510674	0.565656	0.983666	1.25898	1.50186	1.9276	2.04924	1.94456	1.75765	1.70152	1.42066
	16				0.807333	0.908685	0.786373	0.977895	1.31998	1.50097	1.90293	2.24481	2.14034	1.94233	1.76843
	17					1.06845	1.00989	1.15161	1.39778	1.61812	1.99678	2.22838	2.14266	2.14603
