# Supplementary material for: Stationary Atrial Fibrillation Properties in the Goat Do Not Entail Stable or Recurrent Conduction Patterns
Source: Front Physiol. 2018 Jul 27;9:947. doi: 10.3389/fphys.2018.00947 (PMC6072874; doi:10.3389/fphys.2018.00947)
Supplement: Supplementary file 1 [file Data_Sheet_1.ZIP › Goat_2_Property maps.xlsx]

## Sheet: AFCL
AFCL
Signals of insufficient quality were excluded from the property maps. Signals could be rejected based on noise low amplitude, large artefact or ventricluar farfields that could not be substracted.
		1	2	3	4	5	6	7	8	9	10	11	12	13	14	15	16	17
1	1					0.160731	0.160731	0.160731	0.160731	0.161694	0.162656	0.163619	0.165544	0.164581					1																		1
	2					0.161694	0.161694	0.159769	0.161694	0.162656	0.162656	0.163619	0.162656	0.165544	0.166506
	3			0.163619	0.162656	0.161694	0.161694	0.161694	0.162656	0.163619	0.163619	0.164581	0.165063	0.165544	0.164581	0.162656
	4		0.161694	0.163619	0.160731	0.160731	0.161694	0.160731	0.162656	0.164581	0.165544	0.165063	0.163619	0.164581	0.165544	0.163619	0.164581
	5	0.161694	0.162175	0.160731	0.159769	0.158807	0.159769	0.161694	0.161694	0.166506	0.166506	0.166506	0.164581	0.164581	0.165544	0.164581	0.164581	0.164581
	6	0.162656	0.161694	0.157844	0.156882	0.156882	0.158807	0.160731	0.161694	0.164581	0.1641	0.1641	0.164581	0.164581	0.165544	0.165544	0.165544	0.163619
	7	0.160731	0.160731	0.157844	0.156882	0.157844	0.157844	0.156882	0.158807	0.158807	0.160731	0.159769	0.160731	0.163619	0.164581	0.164581	0.164581	0.164581
	8	0.158807	0.158807	0.157844	0.156882	0.156882	0.1564	0.155919	0.155919	0.155919	0.157844	0.158807	0.159769	0.160731	0.161694	0.163619	0.164581	0.165063
	9	0.158807	0.157844	0.157363	0.155919	0.155919	0.155919	0.154957	0.155919	0.154957	0.155919	0.156882	0.156882	0.158807	0.159769	0.160731	0.164581	0.165544
	10	0.157844	0.157844	0.155919	0.156882	0.155438	0.155919	0.154957	0.155919	0.154957	0.154957	0.155919	0.156882	0.157844	0.157844	0.158807	0.161694	0.162175
	11	0.158807	0.157844	0.156882	0.156882	0.155919	0.154957	0.155919	0.154957	0.154957	0.154957	0.155919	0.155919	0.155919	0.156882	0.157363	0.158807	0.158807
	12	0.158807	0.156882	0.155919	0.155919	0.155919	0.155919	0.155919	0.154957	0.154957	0.153994	0.153994	0.154957	0.154957	0.155919	0.155919	0.156882	0.157844
	13	0.158807	0.156882	0.155919	0.155919	0.154957	0.154957	0.1564	0.154957	0.154957	0.153994	0.154957	0.154957	0.154957	0.155919	0.155919	0.156882	0.156882
	14		0.156882	0.154957	0.154957	0.154957	0.154957	0.154957	0.155919	0.155919	0.153994	0.154957	0.154957	0.155919	0.154957	0.155919	0.156882
	15			0.155919	0.155438	0.155919	0.154957	0.154957	0.155919	0.154957	0.154957	0.154957	0.153994	0.154957	0.154957	0.155919
	16				0.155919	0.155919	0.155919	0.154957	0.155919	0.154957	0.154957	0.154957	0.155919	0.155919	0.155919
	17						0.154957	0.154957	0.154957	0.154957	0.154957	0.154957	0.155919	0.155919
2	1					0.157844	0.157844	0.157844	0.159769	0.160731	0.162656	0.163619	0.167469	0.165544					2																		2
	2					0.158807	0.158807	0.158807	0.159769	0.161694	0.162656	0.163619	0.165544	0.166506	0.165544
	3			0.161694	0.160731	0.160731	0.159769	0.16025	0.160731	0.161694	0.163619	0.163619	0.163619	0.165544	0.165544	0.163619
	4		0.161694	0.160731	0.158807	0.158807	0.159769	0.159769	0.160731	0.163619	0.164581	0.163619	0.164581	0.165544	0.164581	0.163619	0.164581
	5	0.159769	0.158807	0.158807	0.156882	0.157844	0.159769	0.16025	0.160731	0.164581	0.165544	0.164581	0.164581	0.165544	0.165544	0.164581	0.164581	0.164581
	6	0.161694	0.159769	0.157844	0.157363	0.157844	0.157844	0.158807	0.159769	0.161694	0.163138	0.164581	0.164581	0.163619	0.165544	0.165544	0.164581	0.164581
	7	0.160731	0.158807	0.156882	0.155919	0.156882	0.155919	0.155919	0.155919	0.157844	0.160731	0.160731	0.161694	0.161694	0.162656	0.165544	0.165544	0.165544
	8	0.158807	0.158807	0.157844	0.1564	0.155919	0.154957	0.155919	0.155919	0.155919	0.157844	0.158807	0.160731	0.160731	0.160731	0.162656	0.165544	0.165544
	9	0.157844	0.158807	0.156882	0.155919	0.155438	0.154957	0.154957	0.154957	0.154957	0.154957	0.155919	0.156882	0.16025	0.161694	0.162656	0.165544	0.164581
	10	0.158325	0.157844	0.156882	0.155919	0.154957	0.154957	0.154957	0.154957	0.154957	0.154957	0.155919	0.155919	0.156882	0.159769	0.160731	0.161694	0.163619
	11	0.158807	0.156882	0.155919	0.155919	0.154957	0.154957	0.154957	0.154957	0.154957	0.154957	0.154957	0.155919	0.155919	0.157844	0.157844	0.159769	0.161694
	12	0.157844	0.157844	0.157844	0.154957	0.155919	0.154957	0.154957	0.153994	0.154957	0.154957	0.154957	0.154957	0.155919	0.156882	0.156882	0.156882	0.156882
	13	0.158807	0.157844	0.156882	0.155919	0.154957	0.154957	0.155919	0.155919	0.153994	0.153994	0.154475	0.153994	0.154957	0.155919	0.156882	0.156882	0.156882
	14		0.158807	0.155919	0.155919	0.154957	0.155919	0.155919	0.155919	0.155919	0.154957	0.154957	0.154957	0.154957	0.154957	0.155919	0.155919
	15			0.155919	0.154957	0.154957	0.154957	0.155919	0.154957	0.155919	0.154957	0.154957	0.154957	0.154957	0.154957	0.155919
	16				0.154957	0.154957	0.154957	0.154957	0.154957	0.155919	0.155919	0.154957	0.154957	0.154957	0.154957
	17						0.154957	0.154957	0.154957	0.155919	0.154957	0.155919	0.155919	0.155919
3	1					0.16025	0.159769	0.159769	0.160731	0.162656	0.163619	0.164581	0.166506	0.169394					3																		3
	2					0.160731	0.159769	0.160731	0.162656	0.162656	0.163619	0.164581	0.165544	0.167469	0.166506
	3			0.165063	0.162656	0.161694	0.160731	0.161694	0.162656	0.162656	0.163619	0.164581	0.165544	0.165544	0.165544	0.164581
	4		0.162656	0.161694	0.160731	0.160731	0.159769	0.160731	0.162656	0.163619	0.163619	0.164581	0.164581	0.164581	0.165063	0.164581	0.165544
	5	0.162656	0.162656	0.16025	0.159769	0.158807	0.159769	0.160731	0.161694	0.164581	0.165544	0.164581	0.164581	0.163619	0.165544	0.164581	0.165544	0.167469
	6	0.162656	0.161694	0.159769	0.158807	0.158807	0.158807	0.158807	0.159769	0.163619	0.164581	0.162656	0.163619	0.163138	0.164581	0.166506	0.166025	0.165544
	7	0.162656	0.16025	0.157844	0.157844	0.157844	0.157844	0.157844	0.157844	0.158807	0.160731	0.160731	0.160731	0.162656	0.162656	0.165544	0.165544	0.165544
	8	0.159769	0.159769	0.158807	0.157844	0.156882	0.156882	0.156882	0.156882	0.1564	0.156882	0.159769	0.16025	0.160731	0.161694	0.163619	0.166506	0.166506
	9	0.158807	0.158807	0.157844	0.157844	0.156882	0.156882	0.155919	0.1564	0.155919	0.155919	0.156882	0.156882	0.160731	0.160731	0.161694	0.164581	0.165544
	10	0.158807	0.157844	0.156882	0.156882	0.155919	0.156882	0.1564	0.155919	0.155919	0.155919	0.155919	0.155919	0.158807	0.159288	0.159769	0.163619	0.162656
	11	0.158325	0.157844	0.156882	0.156882	0.156882	0.1564	0.155919	0.155919	0.155919	0.155919	0.155438	0.154957	0.157844	0.157844	0.157844	0.159769	0.160731
	12	0.159769	0.157844	0.157844	0.155919	0.155919	0.155919	0.155919	0.154957	0.155438	0.154957	0.155919	0.155919	0.156882	0.156882	0.156882	0.157844	0.158807
	13	0.158807	0.158807	0.156882	0.156882	0.155919	0.155919	0.156882	0.1564	0.155919	0.155919	0.155919	0.155919	0.155919	0.155919	0.156882	0.156882	0.156882
	14		0.157844	0.156882	0.156882	0.156882	0.155919	0.156882	0.1564	0.157844	0.155919	0.155919	0.155919	0.156882	0.155919	0.155919	0.156882
	15			0.156882	0.156882	0.155919	0.155919	0.155919	0.155919	0.156882	0.155919	0.155919	0.155919	0.155919	0.155919	0.155919
	16				0.156882	0.155919	0.155919	0.155919	0.155919	0.156882	0.155919	0.155919	0.156882	0.156882	0.155919
	17						0.155919	0.156882	0.1564	0.155919	0.155919	0.155919	0.156882	0.156882
4	1					0.159769	0.158807	0.157844	0.158807	0.160731	0.161694	0.162656	0.164581	0.166506					4																		4
	2					0.158807	0.158807	0.158807	0.159769	0.161694	0.161694	0.162656	0.162656	0.166506	0.163619
	3			0.162656	0.161694	0.159769	0.158807	0.159769	0.159769	0.161694	0.161694	0.162175	0.162656	0.162656	0.162656	0.161694
	4		0.160731	0.160731	0.158807	0.159769	0.158807	0.158807	0.160731	0.162656	0.163619	0.162656	0.162656	0.162656	0.162656	0.160731	0.160731
	5	0.160731	0.160731	0.159769	0.158325	0.158807	0.159769	0.159769	0.160731	0.165063	0.163619	0.163619	0.161694	0.162656	0.163619	0.161694	0.161694	0.161694
	6	0.160731	0.159769	0.157844	0.157844	0.157844	0.157844	0.158807	0.158807	0.161694	0.162656	0.161694	0.162656	0.162656	0.163619	0.163619	0.162656	0.162656
	7	0.160731	0.158807	0.156882	0.1564	0.156882	0.156882	0.156882	0.156882	0.157844	0.159769	0.158807	0.159769	0.160731	0.161694	0.162656	0.161694	0.163619
	8	0.158807	0.159769	0.157844	0.155919	0.155919	0.154957	0.154957	0.154957	0.155919	0.156882	0.157844	0.157844	0.158807	0.159769	0.159769	0.161694	0.162656
	9	0.157363	0.157844	0.156882	0.154957	0.154957	0.153994	0.154957	0.154957	0.153994	0.153994	0.154957	0.154957	0.157844	0.157844	0.159769	0.162656	0.161694
	10	0.157844	0.156882	0.155919	0.155919	0.153994	0.154957	0.154957	0.154957	0.153994	0.154957	0.154957	0.154957	0.155919	0.156882	0.158807	0.160731	0.160731
	11	0.157844	0.157844	0.156882	0.154957	0.155919	0.155919	0.153994	0.153994	0.153994	0.154957	0.153994	0.154957	0.154957	0.154957	0.156882	0.157844	0.157844
	12	0.158807	0.156882	0.155919	0.154957	0.154957	0.154957	0.153994	0.153994	0.153994	0.153032	0.154957	0.154957	0.154957	0.154957	0.154957	0.156882	0.156882
	13	0.157844	0.157844	0.154957	0.153994	0.153994	0.154957	0.154957	0.154957	0.154957	0.153994	0.153994	0.153994	0.153994	0.154957	0.154957	0.155919	0.155919
	14		0.155919	0.154957	0.154957	0.153994	0.153994	0.154475	0.155919	0.155438	0.154957	0.153994	0.153994	0.154957	0.154957	0.154957	0.155438
	15			0.154957	0.153994	0.153994	0.153994	0.153994	0.154475	0.155919	0.154957	0.153994	0.154957	0.153994	0.154957	0.154957
	16				0.153994	0.153994	0.153994	0.153994	0.153994	0.154957	0.154957	0.153994	0.155919	0.154957	0.153994
	17						0.154957	0.154957	0.154957	0.154957	0.154957	0.154957	0.155919	0.154957
5	1					0.158807	0.158807	0.158807	0.161694	0.161694	0.163619	0.164581	0.166506	0.16795					5																		5
	2					0.159769	0.158807	0.159769	0.161694	0.162656	0.164581	0.164581	0.165544	0.167469	0.166506
	3			0.165544	0.163619	0.161694	0.160731	0.161694	0.161694	0.164581	0.164581	0.164581	0.163619	0.165544	0.165544	0.164581
	4		0.164581	0.163619	0.160731	0.160731	0.160731	0.161694	0.162656	0.163619	0.164581	0.163619	0.163619	0.164581	0.165544	0.165544	0.164581
	5	0.162656	0.162656	0.161694	0.160731	0.159769	0.161694	0.161694	0.162656	0.166506	0.167469	0.165544	0.165544	0.166506	0.166506	0.164581	0.163619	0.165544
	6	0.163619	0.161694	0.158807	0.158807	0.159769	0.159769	0.159769	0.161694	0.165544	0.165544	0.164581	0.164581	0.164581	0.165544	0.165544	0.165544	0.167469
	7	0.160731	0.160731	0.157844	0.157844	0.157844	0.157844	0.157844	0.158807	0.159769	0.161694	0.161694	0.162656	0.165544	0.164581	0.165544	0.164581	0.165544
	8	0.159769	0.16025	0.158807	0.156882	0.157844	0.155919	0.155919	0.155919	0.1564	0.157844	0.159769	0.160731	0.162656	0.163619	0.164581	0.166987	0.166506
	9	0.158807	0.158807	0.156882	0.155919	0.155919	0.155919	0.155919	0.155919	0.155919	0.155919	0.156882	0.156882	0.159769	0.161694	0.163619	0.166506	0.166506
	10	0.159769	0.159769	0.156882	0.156882	0.155919	0.155919	0.155919	0.155919	0.155919	0.155919	0.155919	0.155919	0.157363	0.159769	0.161694	0.163619	0.164581
	11	0.158807	0.158807	0.157844	0.156882	0.1564	0.155919	0.155919	0.155919	0.155919	0.155919	0.155919	0.155919	0.157844	0.157844	0.158325	0.160731	0.162656
	12	0.159769	0.158807	0.157844	0.156882	0.155919	0.155919	0.155919	0.154957	0.155919	0.155919	0.155919	0.155919	0.155919	0.156882	0.157844	0.159769	0.159769
	13	0.159769	0.157844	0.155919	0.156882	0.155919	0.155919	0.155919	0.156882	0.155919	0.155919	0.155919	0.155919	0.155919	0.156882	0.157844	0.158807	0.158807
	14		0.157844	0.156882	0.156882	0.156882	0.155919	0.155919	0.156882	0.156882	0.155919	0.155919	0.155919	0.155919	0.155919	0.157363	0.158807
	15			0.156882	0.1564	0.155919	0.155919	0.155919	0.155919	0.156882	0.156882	0.155919	0.155919	0.155919	0.156882	0.156882
	16				0.1564	0.155919	0.155919	0.155919	0.155919	0.155919	0.155919	0.155919	0.157844	0.156882	0.156882
	17						0.155919	0.155919	0.155919	0.155919	0.155919	0.155919	0.157844	0.156882
6	1					0.159769	0.158807	0.158807	0.158807	0.161694	0.162656	0.163619	0.166506	0.169394					6																		6
	2					0.160731	0.159769	0.159769	0.160731	0.162656	0.161694	0.162656	0.164581	0.165544	0.165544
	3			0.163619	0.163619	0.161694	0.160731	0.160731	0.160731	0.161694	0.162656	0.162656	0.163619	0.163619	0.164581	0.162656
	4		0.161694	0.162656	0.160731	0.160731	0.160731	0.160731	0.161694	0.161694	0.163619	0.163619	0.163619	0.164581	0.164581	0.163619	0.163619
	5	0.160731	0.162656	0.160731	0.159769	0.159769	0.16025	0.160731	0.162656	0.167469	0.165544	0.163619	0.163619	0.164581	0.165544	0.164581	0.164581	0.165544
	6	0.162656	0.160731	0.158325	0.157844	0.158807	0.159769	0.160731	0.161694	0.165544	0.164581	0.163619	0.164581	0.164581	0.164581	0.166506	0.165544	0.165544
	7	0.161694	0.159769	0.156882	0.155919	0.156882	0.156882	0.156882	0.158807	0.159769	0.160731	0.160731	0.160731	0.163619	0.164581	0.166987	0.165544	0.165544
	8	0.159769	0.158807	0.156882	0.156882	0.155919	0.155919	0.155919	0.155919	0.155919	0.156882	0.158807	0.160731	0.162656	0.162656	0.164581	0.165544	0.166506
	9	0.158807	0.157844	0.155919	0.155919	0.155919	0.155919	0.155919	0.154957	0.155919	0.155919	0.155919	0.155919	0.158807	0.161694	0.162656	0.163619	0.165544
	10	0.157844	0.157844	0.155919	0.154957	0.155919	0.155919	0.155919	0.155919	0.155919	0.154957	0.154957	0.155919	0.156882	0.158807	0.161694	0.163619	0.161694
	11	0.157844	0.157844	0.155919	0.154957	0.155919	0.155919	0.155919	0.155919	0.155919	0.155919	0.154957	0.154957	0.156882	0.157844	0.157844	0.160731	0.161694
	12	0.157844	0.157844	0.156882	0.154957	0.154957	0.154957	0.155919	0.154957	0.155919	0.155919	0.155919	0.154957	0.155919	0.154957	0.156882	0.157844	0.158807
	13	0.157844	0.157844	0.155919	0.155919	0.154957	0.155919	0.155919	0.155919	0.155919	0.155919	0.154957	0.154957	0.154957	0.155919	0.1564	0.156882	0.156882
	14		0.157844	0.155919	0.155919	0.155919	0.155919	0.155919	0.156882	0.156882	0.155919	0.155919	0.155919	0.154957	0.154957	0.154957	0.156882
	15			0.156882	0.155919	0.155919	0.155919	0.155919	0.155919	0.155919	0.155919	0.155919	0.155919	0.154957	0.155919	0.155919
	16				0.155919	0.155919	0.155919	0.155919	0.155919	0.155919	0.155919	0.155919	0.1564	0.156882	0.155919
	17						0.155919	0.155919	0.155919	0.154957	0.155919	0.155919	0.155919	0.155919
7	1					0.159769	0.157844	0.158807	0.159769	0.160731	0.161694	0.162656	0.164581	0.167469					7																		7
	2					0.160731	0.158807	0.159769	0.159769	0.162656	0.161694	0.161694	0.163619	0.165544	0.165544
	3			0.164581	0.161694	0.159769	0.159769	0.160731	0.161213	0.162656	0.162656	0.162656	0.164581	0.164581	0.165063	0.164581
	4		0.162656	0.162656	0.158807	0.159769	0.158807	0.160731	0.160731	0.162656	0.163619	0.163619	0.164581	0.163619	0.165063	0.164581	0.165544
	5	0.160731	0.163619	0.158807	0.157844	0.157363	0.158807	0.159769	0.161694	0.165544	0.166506	0.165544	0.164581	0.164581	0.165544	0.164581	0.165544	0.166506
	6	0.162656	0.161694	0.156882	0.155919	0.156882	0.157844	0.156882	0.159769	0.163619	0.164581	0.164581	0.165544	0.164581	0.165544	0.165544	0.165544	0.165544
	7	0.161694	0.158807	0.155919	0.155919	0.154957	0.155919	0.155919	0.155919	0.157844	0.160731	0.160731	0.162656	0.163619	0.163619	0.164581	0.164581	0.166506
	8	0.158807	0.159769	0.155919	0.154957	0.153994	0.153994	0.154957	0.154957	0.153994	0.154957	0.156882	0.158807	0.160731	0.161694	0.162656	0.164581	0.165544
	9	0.157844	0.157844	0.154957	0.153994	0.153994	0.153994	0.153994	0.153994	0.153032	0.153032	0.153994	0.154957	0.157844	0.159769	0.161694	0.1641	0.166506
	10	0.157844	0.157844	0.153994	0.153994	0.153994	0.153994	0.153994	0.153994	0.153994	0.153994	0.153513	0.153994	0.155438	0.157844	0.158807	0.162656	0.162656
	11	0.158807	0.156882	0.155919	0.153994	0.153994	0.153994	0.153032	0.153032	0.153994	0.153994	0.153994	0.153994	0.154957	0.156882	0.156882	0.158807	0.160731
	12	0.158807	0.155919	0.155919	0.153994	0.153994	0.153994	0.153994	0.153994	0.153032	0.153513	0.153994	0.153994	0.153994	0.154957	0.153994	0.154957	0.156882
	13	0.158807	0.156882	0.153994	0.153994	0.153994	0.153994	0.154475	0.154957	0.153994	0.153032	0.153032	0.153513	0.153032	0.153994	0.153994	0.154957	0.155919
	14		0.1564	0.154475	0.153994	0.154957	0.153994	0.153994	0.153994	0.153994	0.153032	0.153032	0.153032	0.153032	0.153032	0.154957	0.154957
	15			0.154957	0.153994	0.153513	0.153032	0.153994	0.153994	0.154957	0.153994	0.153032	0.153994	0.153032	0.153994	0.154957
	16				0.153994	0.153994	0.154957	0.153994	0.153994	0.153994	0.153994	0.153994	0.154475	0.153994	0.153994
	17						0.153994	0.153994	0.153994	0.153994	0.153032	0.153994	0.153994	0.153994
8	1					0.162656	0.161694	0.161694	0.162656	0.164581	0.165544	0.166506	0.167469	0.167469					8																		8
	2					0.162656	0.162656	0.162656	0.163619	0.166506	0.166506	0.165544	0.166987	0.167469	0.167469
	3			0.164581	0.162656	0.163619	0.162656	0.163619	0.164581	0.165544	0.165544	0.166506	0.165544	0.166506	0.166506	0.165544
	4		0.163619	0.161694	0.160731	0.162656	0.163138	0.163138	0.164581	0.164581	0.166506	0.166506	0.165544	0.164581	0.166506	0.165544	0.165544
	5	0.162656	0.163619	0.160731	0.159769	0.160731	0.161694	0.163619	0.164581	0.167469	0.166987	0.165544	0.166025	0.165544	0.166506	0.166506	0.165544	0.165544
	6	0.163619	0.161694	0.159769	0.158807	0.159769	0.159769	0.160731	0.162656	0.165544	0.165544	0.164581	0.164581	0.165544	0.167469	0.166506	0.165544	0.165544
	7	0.162656	0.160731	0.158325	0.156882	0.158325	0.157844	0.157844	0.158807	0.160731	0.162656	0.162656	0.162656	0.165544	0.165544	0.165544	0.166506	0.168431
	8	0.160731	0.160731	0.158807	0.157844	0.155919	0.155919	0.155919	0.156882	0.155919	0.158807	0.159769	0.162656	0.163619	0.163619	0.164581	0.165544	0.166506
	9	0.159769	0.159769	0.157844	0.155919	0.155919	0.155919	0.155919	0.154957	0.154475	0.154957	0.156882	0.158807	0.161694	0.162656	0.163619	0.166506	0.165544
	10	0.159769	0.158807	0.156882	0.155919	0.155919	0.154957	0.154957	0.154957	0.154475	0.154957	0.154957	0.155919	0.157844	0.159769	0.162656	0.163619	0.165544
	11	0.158807	0.158807	0.1564	0.155919	0.155919	0.154957	0.154957	0.154957	0.153994	0.154957	0.154957	0.155919	0.156882	0.157844	0.158807	0.161694	0.162175
	12	0.159769	0.158807	0.157844	0.155919	0.155919	0.155919	0.154957	0.153994	0.153994	0.154957	0.154957	0.155438	0.155919	0.155919	0.155919	0.156882	0.158807
	13	0.158807	0.157844	0.156882	0.155919	0.155919	0.154957	0.155919	0.155919	0.154957	0.153994	0.153994	0.154957	0.154957	0.156882	0.155919	0.156882	0.156882
	14		0.157844	0.156882	0.156882	0.155919	0.154957	0.154957	0.155919	0.155919	0.153994	0.153994	0.154957	0.154957	0.154957	0.155919	0.155919
	15			0.156882	0.155919	0.154957	0.154957	0.155919	0.155919	0.155919	0.154957	0.154957	0.154957	0.154957	0.154957	0.154957
	16				0.154957	0.154957	0.154957	0.155919	0.155919	0.155919	0.155919	0.154957	0.155919	0.155919	0.154957
	17						0.154957	0.154957	0.155919	0.155919	0.154957	0.154957	0.155919	0.155919
9	1					0.157844	0.156882	0.157844	0.159288	0.160731	0.161694	0.161694	0.163619	0.164581					9																		9
	2					0.159769	0.158807	0.158807	0.160731	0.161694	0.161694	0.161694	0.163619	0.164581	0.163619
	3			0.163619	0.161694	0.159769	0.158807	0.159769	0.160731	0.161694	0.162656	0.162656	0.162656	0.163619	0.163138	0.162656
	4		0.162656	0.161694	0.159769	0.158807	0.159288	0.159769	0.160731	0.163619	0.162656	0.161694	0.162656	0.162656	0.162656	0.162656	0.163619
	5	0.160731	0.159769	0.158807	0.158807	0.157844	0.158807	0.160731	0.162656	0.164581	0.164581	0.163619	0.163138	0.163619	0.163619	0.163619	0.163619	0.164581
	6	0.161694	0.159769	0.156882	0.156882	0.157844	0.157844	0.157844	0.159769	0.162656	0.162656	0.163138	0.163619	0.162656	0.163619	0.164581	0.163619	0.164581
	7	0.160731	0.158807	0.156882	0.156882	0.156882	0.1564	0.156882	0.155919	0.158807	0.159769	0.159769	0.159769	0.160731	0.160731	0.162656	0.165544	0.164581
	8	0.158807	0.158807	0.157844	0.156882	0.155919	0.153994	0.154957	0.154957	0.154957	0.155919	0.157844	0.157844	0.160731	0.158807	0.160731	0.164581	0.165544
	9	0.157844	0.156882	0.156882	0.156882	0.155919	0.154957	0.154957	0.154957	0.153994	0.153994	0.154957	0.154957	0.156882	0.159769	0.160731	0.163619	0.164581
	10	0.156882	0.156882	0.155919	0.155919	0.155919	0.154957	0.153994	0.154957	0.153994	0.153994	0.153994	0.153994	0.155919	0.156882	0.157844	0.160731	0.162656
	11	0.156882	0.156882	0.155919	0.155919	0.154957	0.153994	0.153994	0.153994	0.153994	0.153994	0.153994	0.153994	0.154957	0.153994	0.155919	0.156882	0.159769
	12	0.156882	0.156882	0.155919	0.154957	0.153994	0.153994	0.153994	0.153994	0.153994	0.153994	0.153994	0.153994	0.153994	0.153994	0.154957	0.154957	0.155438
	13	0.157844	0.155919	0.154957	0.153994	0.153994	0.153994	0.153513	0.153994	0.153994	0.153994	0.153994	0.153994	0.153032	0.155438	0.154957	0.154957	0.154957
	14		0.155919	0.154957	0.153994	0.153994	0.153994	0.153994	0.154957	0.153994	0.153032	0.153994	0.153994	0.153994	0.153994	0.154957	0.154957
	15			0.154957	0.153994	0.153994	0.153994	0.153032	0.154957	0.154475	0.153994	0.153032	0.153994	0.153994	0.153994	0.153994
	16				0.153994	0.153994	0.153994	0.153513	0.153994	0.154957	0.154957	0.153994	0.154957	0.153994	0.153994
	17						0.153994	0.153994	0.153994	0.154957	0.153994	0.153994	0.154957	0.153994
10	1					0.158807	0.157844	0.156882	0.158807	0.160731	0.161694	0.161694	0.163619	0.164581					10																		10
	2					0.157844	0.157363	0.158807	0.158807	0.160731	0.160731	0.161694	0.161694	0.162656	0.163619
	3			0.161694	0.16025	0.158807	0.159288	0.159769	0.160731	0.161694	0.161694	0.160731	0.162656	0.161694	0.161694	0.161694
	4		0.160731	0.160731	0.158325	0.158807	0.159769	0.159769	0.160731	0.161694	0.160731	0.160731	0.160731	0.162656	0.161694	0.162656	0.161694
	5	0.158807	0.160731	0.158807	0.157844	0.158807	0.158807	0.159769	0.160731	0.163619	0.162656	0.161694	0.161694	0.162656	0.163619	0.162656	0.160731	0.160731
	6	0.161694	0.158807	0.156882	0.155919	0.156882	0.157844	0.157844	0.158807	0.160731	0.161694	0.161694	0.161694	0.161694	0.163619	0.162656	0.161694	0.161694
	7	0.158807	0.158807	0.155919	0.155919	0.154957	0.154957	0.154957	0.155919	0.156882	0.158807	0.157844	0.158807	0.160731	0.160731	0.162656	0.161694	0.162656
	8	0.156882	0.157844	0.155919	0.153994	0.153994	0.154957	0.153994	0.153032	0.153994	0.155919	0.155919	0.157844	0.157844	0.158807	0.160731	0.161694	0.164581
	9	0.155919	0.155919	0.154957	0.153994	0.153513	0.153994	0.153032	0.153032	0.153032	0.153994	0.153994	0.153994	0.156882	0.157844	0.159769	0.162656	0.163619
	10	0.156882	0.155919	0.153994	0.153994	0.153994	0.153032	0.153032	0.153032	0.153032	0.153994	0.153513	0.153994	0.154957	0.155919	0.156882	0.158807	0.161694
	11	0.156882	0.155919	0.154957	0.153032	0.153994	0.153994	0.153994	0.153032	0.153994	0.153032	0.153032	0.153032	0.154957	0.154957	0.155919	0.156882	0.157844
	12	0.156882	0.155919	0.154957	0.154475	0.153994	0.153032	0.153513	0.153032	0.153994	0.153994	0.153032	0.153032	0.153994	0.154957	0.153994	0.154957	0.154957
	13	0.156882	0.155919	0.154957	0.153994	0.153994	0.153994	0.153994	0.153513	0.153032	0.153032	0.153032	0.153032	0.153032	0.153994	0.153994	0.153994	0.154957
	14		0.155919	0.153994	0.153994	0.153032	0.153994	0.153994	0.154957	0.153994	0.153032	0.153994	0.153032	0.153994	0.153994	0.153032	0.153994
	15			0.153994	0.153513	0.153032	0.153994	0.153994	0.153994	0.153994	0.153994	0.153032	0.153032	0.153032	0.153513	0.153994
	16				0.153032	0.153513	0.153994	0.153513	0.153994	0.153994	0.153994	0.153994	0.153994	0.153032	0.153513
	17						0.153032	0.153513	0.153994	0.153994	0.153032	0.153994	0.153994	0.153994

## Sheet: DISS
MaxDissociation
Signals of insufficient quality were excluded from the property maps. Signals could be rejected based on noise low amplitude, large artefact or ventricluar farfields that could not be substracted.
		1	2	3	4	5	6	7	8	9	10	11	12	13	14	15	16	17
1	1					8.23077	9.42063	11.082	14.7989	14.8249	14.4435	14.5462	22.541	26.7863					1																		1
	2					14.2819	14.836	16.1711	17.4519	18.1676	16.9191	17.3587	25.2973	27.6322	27.3743
	3			15.246	16.4086	15.9149	15.6303	16.8235	18.6979	19.629	19.4447	18.7459	20.7193	21.9645	21.439	18.2627
	4		19.4758	19.2347	18.8889	15.9708	15.3707	17.2016	21.0933	24.3011	24.2131	21.7726	20.9566	19.9946	20.8174	19.4059	16.5312
	5	18.809	22.5067	19.4828	16.7863	15.9447	16.1772	18.5699	22.6481	26.7717	27.861	23.811	20.4891	20.5041	22.8288	22.4259	19.6757	16.842
	6	20.3059	25.0741	18.832	14.4895	15.2663	15.7612	17.2116	22.4164	27.0938	28.1563	25.6415	22.376	21.2908	22.6721	23.3624	22.2452	18.6748
	7	18.1436	21.6844	16.9237	12.4334	11.7533	13.0445	15.042	18.6587	23.4841	24.5559	23.582	22.2273	22.6676	23.3733	23.375	23.2892	19.4447
	8	14.9921	18.4591	15.3281	11.1073	9.41775	8.81723	9.91906	11.4005	16.6047	18.853	20.6895	21.4814	21.8957	23.6364	23.9274	24.4043	19.1117
	9	12.3598	15.55	14.5538	10.2513	7.86649	6.16492	5.83377	8.01044	10.094	14.2775	15.8303	18.8691	20.4074	22.0904	24.5187	27.3838	24.0408
	10	11.7784	15.6649	15.2158	10.6806	8.07572	6.99739	7.15065	7.63969	8.16188	11.2402	11.3272	13.0838	17.082	19.7102	23.1741	27.992	25.9973
	11	12.5185	15.3122	15.4319	11.9686	10.53	10.6136	9.84031	9.56658	10.0339	10.8665	10.9738	11.2428	13.812	15.8215	16.685	19.5411	18.3042
	12	12.061	15	14.8799	12.0892	10.53	10.8084	10.8084	10.752	10.2376	10.8407	10.5651	11.2173	13.5911	13.3832	13.0183	14.7251	13.1601
	13	11.5778	13.5541	12.8895	10.1021	9.09162	9.06789	9.75457	10.2592	9.81462	8.88512	9.06005	9.47258	11.3646	11.4909	10.8355	11.1963	9.67192
	14		10.7388	11.3272	10.2408	9.47644	8.16492	8.0733	9.56397	10.0733	9.03125	7.79688	8.13542	9.28198	9.13281	8.77285	9.28721
	15			8.53665	8.58747	7.76702	7.24346	7.08115	8.32984	9.68848	9.72324	8.86684	8.7474	9.14099	8.7474	7.86945
	16							7.99476	7.33508	8.46457	8.20888	8.65183	9.81462	8.44503	8.02618
	17							6.81984	6.29581	6.31937	6.21149	6.75718	7.61619	7.69895
2	1					9.17143	10.2592	12.5759	14.3947	14.8571	15.4798	15.5269	25.1267	28.1995					2																		2
	2					15.6031	16.6719	17.1263	17.6474	19.2747	17.3118	18.5378	27.4432	27.1744	26.3379
	3			16.2249	19.0397	18.231	17.7113	19.3622	21.8684	22.1787	19.1421	17.3324	19.227	19.6477	18.712	15.0679
	4		20.029	19.9868	19.1361	16.748	17.5741	19.1029	24.1451	27.632	25.3639	20.1541	18.1789	18.4049	17.7595	16.3288	16.0189
	5	20.1837	22.1243	18.9896	16.3481	17.2455	17.9423	20.4121	25.0714	29.3592	28.2903	23.8091	21.9623	22.0135	20.8347	20.2318	20.062	16.2769
	6	21.7778	25.2749	17.9792	13.8831	16.171	17.3979	18.6406	22.7664	27.6923	28.63	26.0672	24.118	23.6263	24.1877	24.1192	25.1582	19.5
	7	19.1984	21.6073	14.8208	11.228	11.0984	13.0701	15.1964	18.5415	21.8932	24.0342	22.1088	22.4255	22.8747	24.9303	25.4124	25.7784	20.8383
	8	15.3194	18.5558	13.5859	10.1169	8.41927	8.44819	8.09845	10.354	15.5104	17.8381	19.8377	20.2929	20.6569	21.3867	23.1925	24.3811	19.4447
	9	12.8665	15.2141	12.8564	9.16321	6.34367	5.77261	5.32124	6.33075	9.70103	13.5052	15.2326	17.2312	19.5594	20.8085	22.6773	25.7957	22.2803
	10	13.4047	16.5759	14.3177	8.67183	5.90933	5.60363	5.35233	5.18863	5.9354	8.9509	10.0644	13.1451	17.3117	20.1	22.6306	26.0267	22.8248
	11	13.8237	16.3097	14.0078	11.1114	8.6658	8.70466	7.72208	7.33333	7.16796	7.45736	7.90181	9.66753	15.5039	17.3377	20.1076	22.3447	20.1417
	12	12.5144	15.376	13.4349	11.1085	8.67183	8.83204	9.24548	9.16062	8.5039	8.64935	8.29351	10.0155	13.9506	14.9611	14.5131	16.4987	14.4621
	13	12.3858	14.1837	12.9974	9.93282	7.76744	8.44444	9.36269	9.97927	9.47927	7.80829	7.87013	9.34026	11.7206	12.0078	11.6354	11.8623	10.1693
	14		13.5223	13.3169	12.0622	10.2591	9.04393	8.47927	9.96114	10.1218	9.43523	7.55584	8.12987	9.52987	9.77202	9.47028	9.38442
	15			11.4845	10.1318	8.86822	7.7416	7.8863	8.86788	10.0104	9.12176	8.01554	8.59585	8.61299	7.86528	7.56995
	16							7.84238	7.50259	8.71948	7.97927	8.09585	9.65803	8.58808	7.63212
	17							6.35233	6.34974	6.32468	5.71762	5.98187	7.6961	8.22078
3	1					8.88204	10.0455	10.208	14.1314	14.8949	15.2081	13.6152	25.5519	27.8434					3																		3
	2					14.056	14.536	15.68	17.6156	18.9677	17.5718	16.7466	26.7221	26.854	24.8984
	3			14.6139	14.9759	13.4113	13.8794	16.3477	19.3824	20.4624	19.1712	16.5326	17.8411	19.267	16.4588	12.5683
	4		18.0429	18.6263	17.7594	13.7193	14.0107	16.3458	19.4717	22.2588	22.5082	19.7404	18.2814	18.5504	17.0845	14.6894	14.6831
	5	17.44	21.0538	17.7748	14.3138	13.1413	14.8369	17.2547	20.5269	25.4636	25.1436	22.9539	19.9482	20.3886	19.5656	17.7615	18.8777	16.9235
	6	18.9011	22.4382	16.4545	12.008	12.5809	14.5119	16.883	20.5559	22.9137	25.3065	21.856	21.5652	22.1301	21.6277	21.564	22.4348	20.0351
	7	16.1801	19.72	14.562	9.97361	10.0528	11.3905	12.7772	17.0132	21.0211	23.1303	20.9093	19.8422	20.6622	22.473	22.6667	23.7793	20.2561
	8	12.6835	16.1645	12.8886	8.2058	6.83421	7.61053	7.65526	10.2842	14.9415	17.5395	17.8492	19.2414	18.9149	19.6685	21.144	23.6866	19.4219
	9	10.9761	13.3963	12.277	7.36148	5.17632	4.85564	5.08399	7.68865	9.90026	13.9554	13.7618	16.1342	17.8533	18.3432	21.7024	24.0595	19.9512
	10	11.0716	13.9868	12.6816	7.23097	4.95538	4.80315	4.5958	4.84777	5.09711	7.74016	8.32808	12.9395	15.5106	16.2361	19.5481	22.283	19.0755
	11	11.5889	13.9206	11.9553	8.81627	7.34121	7.65879	6.55643	6.2336	5.8189	6.52094	6.95801	8.75654	13.2711	14.8624	16.4867	17.5296	15.2895
	12	11.1253	13.5239	10.9072	8.60892	7.4042	7.81102	8.3534	8.08661	6.99738	7.02618	7.02887	8.81579	12.3342	12.3377	12.0423	14.2427	11.2766
	13	10.366	12.19	11.7848	8.56693	7.90551	8.14173	8.56955	9.01837	8.37895	6.58947	6.74474	7.50263	10.066	10.4132	9.51715	9.95789	8.64116
	14		11.8069	10.6824	9.92388	9.69211	8.70263	7.22955	8.65699	8.92368	8.4	7.10789	7.60789	8.15263	8.54211	8.08179	8.30079
	15			9.03958	8.90263	8.20263	7.40526	7.14474	7.85789	8.9895	8.06579	7.96316	8.20526	8.12895	7.67368	7.34037
	16							7.83158	7.01316	7.82632	7.14698	7.74211	9.21842	7.67546	7.35526
	17							6.70789	6.74406	5.78684	4.73684	5.64737	7.31053	7.51187
4	1					8.74142	10.399	12.2572	15.2632	14.4854	14.4582	15.5565	24.5472	26.1875					4																		4
	2					14.1601	14.5289	15.6781	17.8259	19.144	17.3787	18.0428	25.3683	26.3504	24.6075
	3			17.2255	16.9093	15.2169	15.273	16.3571	19.4485	18.9064	17.448	17.3673	19.3636	21.2032	18.9573	16.1596
	4		18.8439	19.5376	19.1135	15.9312	15.8069	17.3799	22.1061	22.885	23.3271	21.5526	20.8717	20.4263	19.9069	17.4681	15.984
	5	18.4147	21.3492	18.3536	15.5013	14.7895	16.0947	19.8997	23.2819	26.4363	25.2493	23.7246	22.1707	23.0294	23.5481	22.4096	19.9153	16.6497
	6	19.7772	22.2793	17.3648	13.678	14.1806	15.4698	16.7388	21.1854	24.545	26.3378	24.8865	23.7048	25.3021	26.0293	26.6463	25.4907	20.3767
	7	18.8575	21.4711	16.4531	12.0052	11.9765	13.613	14.8649	18.2715	21.9452	23.2711	22.9659	21.6807	22.0818	25.8329	26.3289	26.9178	21.1559
	8	14.7822	19.0132	16.1368	12.1917	10.124	10.3902	10.5245	10.7254	16.0959	17.9688	18.9635	20.1623	20.4895	21.2243	24.4485	27.1809	19.7067
	9	12.6031	16.126	15.0545	11.5438	7.91753	6.07216	5.60309	6.70361	9.23196	12.6392	15.0438	17.3763	18.8646	20.0237	23.6299	25.6207	21.3873
	10	12.534	16.9036	16.2191	11.0052	7.28093	6.37371	5.70103	5.47938	6.58763	9.51289	9.61757	11.8041	16.0879	17.8099	20.6772	22.492	19.0264
	11	13.8325	16.9634	16.2629	12.2139	10.0155	9.5323	8.17784	7.87887	8.13918	8.38144	9.22165	10.268	14.2062	15.8946	16.0888	18.8766	15.8763
	12	12.4173	16.0052	14.9818	12.4522	9.83763	9.28866	9.17313	9.02584	8.40155	9.34278	9.34109	10.1705	13.4433	13.8634	12.8964	15.0914	12.5469
	13	11.8325	13.7342	14.4249	10.7577	8.31959	8.54897	8.97938	9.46632	8.89896	7.65722	8.07732	9.13918	11.1856	11.6057	11.5648	11.0751	9.95855
	14		12.7285	13.6057	10.3282	9.52972	8.24485	8.18346	9.89119	10	9.81186	7.64948	7.52062	8.98446	9.40415	9.21447	9.00517
	15			9.49742	8.76031	8.04381	7.70361	8.10052	8.58398	10.101	9.55556	8.90464	8.52577	8.76289	7.89147	7.55297
	16							8.57881	8.12887	8.94574	7.84456	8.62791	9.84278	8.53866	7.83721
	17							7.13437	7.29199	6.1366	5.87371	6.1938	7.54639	7.78608
5	1					8.45358	9.10053	11.2672	15.6011	14.8459	13.0652	12.5479	22.6436	27.2418					5																		5
	2					15.1383	16.4032	17.4721	19.1019	19.3794	16.624	15.8447	25.728	26.0989	24.6904
	3			15.538	18.6684	16.4492	17.5775	18.0561	20.043	19.3686	17.5462	15.3597	18.1417	19.6311	17	14.4305
	4		19.1599	19.5941	18.8533	16.3503	17.3458	16.9812	21.7709	23.2108	23.1168	19.0951	17.3161	18.5504	17.5014	15.7473	13.3587
	5	18.7112	22.477	18.3189	15.4427	15.0347	16.9144	18.4543	21.4568	27.3443	26.5477	22.7147	19.5489	20.1033	19.6049	18.1301	17.3541	13.7453
	6	20.2453	23.957	18.0105	13.1958	14.4894	15.8862	18.4881	22.0426	26.0889	27.5757	24.0054	23.1382	23.8054	23.1622	22.375	22.0596	18.3068
	7	16.2353	20.1051	14.9921	10.8492	11.2612	13.0739	14.8717	18.0737	21.4574	23.7314	23.1283	22.1048	22.2703	23.7073	24.0217	23.3451	20.5589
	8	13.0851	17.5623	14.9815	10.267	8.86842	9.16798	8.8564	10.0888	15.107	17.0026	18.8488	20.6347	21.3155	21.5351	24.0108	25.0438	20.3753
	9	12.2766	14.8107	13.15	7.87958	5.8094	5.09399	4.77023	5.39948	8.44125	13.0366	14.0132	15.8734	18.2838	20.1609	22.7967	25.9619	22.1713
	10	11.2773	14.1072	13.0528	7.28796	5.36292	5.16492	4.64491	4.61097	4.99217	8.09399	9.01309	12.2251	15.1055	17.2111	21.877	25.3008	22.5055
	11	12.4587	14.904	13.6526	9.95039	8.53003	8.55352	7.26178	6.50914	6.40731	6.7624	7.18277	8.58747	14.2684	15.7388	17.0237	20.2727	17.9378
	12	11.5665	14.4043	12.359	10.2763	8.6063	8.38482	8.79319	8.93979	7.85079	7.67016	7.55352	8.54569	11.7493	13.0449	12.7619	14.4406	12.1111
	13	11.0635	12.3519	11.769	9.02625	7.87173	8.15183	9.29843	9.67979	8.90526	7.47644	7.37435	7.03403	10.0812	11.4188	10.9842	10.81	9.13456
	14		10.8734	11.2257	10.5013	10.0684	8.49215	7.88714	9.34908	9.30789	8.88189	7.55643	7.41623	8.41361	9.30628	9.42782	8.8971
	15			8.65879	9.42257	8.67192	7.28346	7.28346	7.95812	9.15748	8.61518	8.42408	8.00789	8.65535	7.87728	7.29319
	16							8.00785	7.09424	7.72966	7.31937	8.46073	9.76903	8.32895	7.71654
	17							6.84031	6.29319	5.49215	5.06806	6.10733	7.2336	7.85039
6	1					7.98408	9.17942	11.6032	14.3448	14.432	13.6935	14.1432	23.6739	26.6836					6																		6
	2					14.1233	14.6561	15.1061	16.5898	16.8468	17.1609	16.6989	24.4459	25.6749	24.6011
	3			15.8347	18.027	14	14.5362	15.2299	17.6096	18.5472	17.4355	15.2865	17.0674	18.1816	17.7596	16.106
	4		18.378	18.4607	18.1702	14.5147	14.484	15.1467	20.2595	21.9757	22.4704	18.9918	17.5703	16.8696	16.7418	15.1685	13.8306
	5	18.0317	21.7676	17.437	14.1064	13.5547	14.0617	15.5121	20.0817	23.8436	24.8011	21.8401	20.0786	18.3188	18.6622	18.5804	16.6875	13.7847
	6	19.3128	22.8157	17.1592	12.3333	13.2228	13.7926	15.3663	19.8449	23.294	25.3747	22.2081	20.5571	20.1471	20.4918	20.8049	20.8777	16.4536
	7	16.0374	18.4907	13.8031	9.23885	10.3526	11.4474	12.7342	16.246	19.8674	21.1653	21.536	19.3387	19.5257	21.769	22.4986	22.0598	16.8449
	8	12.2211	15.409	10.9263	6.8	6.24346	6.65969	7.60471	8.67277	14.089	16.1953	17.3005	19.3244	19.7193	20.606	22.6423	24.2888	18.5028
	9	10.6174	12.5397	9.80211	5.85827	4.0733	3.91099	3.96073	5.09162	6.67277	10.7225	13.6126	16.4503	18.131	19.7135	22.1486	24.2087	19.4192
	10	9.31481	12.4233	11.2887	6.16754	4.24346	4.26702	4.04712	4.13089	4.45288	7.64921	7.44764	10.9659	14.5906	16.8936	20.0968	22.0894	18.9592
	11	9.59416	12.1455	11.4488	8.38743	7.21728	7.36126	6.34031	5.81414	5.79843	6.06021	6.79058	7.82199	12.9423	14.7816	15.9788	17.293	15.7295
	12	8.95756	12.3862	10.9365	8.67016	7.25131	7.7199	8.03665	7.82199	6.92932	6.77487	6.80628	8.02618	12.1155	12.5564	12.3816	14.183	12.1618
	13	9.38462	11.1485	11.2277	7.99738	7.0288	7.60733	8.39267	8.90314	7.86126	6.25131	6.39529	6.96597	9.45026	10.0976	9.35092	10.336	9.34474
	14		10.3952	10.7199	9.34817	9.3822	7.8822	7.25654	8.61942	8.68848	8.46335	6.55236	6.29581	7.76178	8.41623	7.83202	8.32895
	15			8.46859	8.27487	7.65445	7.01047	6.81414	7.43717	8.69291	8.1178	7.96335	7.81152	8.03927	7.16754	6.59055
	16							7.53403	6.60733	7.80105	6.81365	8	8.85039	7.6178	6.90314
	17							6.47382	6.31937	5.30105	4.63874	5.53018	7.00262	7.48429
7	1					9.93668	10.9711	11.6095	14.7725	13.8777	13.9758	15.5349	23.9066	28.1557					7																		7
	2					14.3564	15.746	17.1587	18.5676	17.7688	17.6989	18.4409	26.3668	27.2767	25.5395
	3			16.1075	16.4085	15.1114	15.3183	16.8293	19.808	20.2406	19.244	17.8889	20.0218	21.1946	18.3388	13.9514
	4		21.9732	20.9251	18.7323	15.291	15.7328	17.2069	22.2739	24.0214	24.6676	21.4809	19.3587	18.9811	17.8447	15.8679	13.9429
	5	21.0895	24.7661	20.8799	17.1671	16.4439	15.9843	19.1504	24.1406	27.5924	27.0763	24.326	22.4809	22.8054	21.2493	19.4784	17.2865	14.4541
	6	22.0427	26.2891	18.5718	14.0964	15.026	14.8277	17.5117	23.3079	26.7024	27.7197	26.5865	25.1281	25.3774	24.1409	22.8248	21.0297	17.3875
	7	18.152	21.6868	15.763	12.4689	11.6182	12.5974	13.4726	18.9091	21.8639	23.591	24.7533	23.6354	23.4113	24.2426	24.5957	23.6237	18.7796
	8	13.6877	17.0608	14.5953	10.151	8.13178	8.33075	8.05943	9.94832	15.5881	18.1615	19.4526	21.6253	23.1013	24	24.6005	25.207	19.4162
	9	10.7553	14.3404	13.7948	8.4832	5.9845	4.90439	4.64083	5.56072	7.44703	11.7021	14.3161	17.7318	21.0814	22.955	23.7162	25.4611	21.0571
	10	10.7342	14.5884	12.938	8.08269	5.20672	5.09561	4.48579	4.3385	5.13953	7.80829	8.79587	12.1912	17.0234	19.1368	20.944	25.4933	22.1203
	11	11.2876	14.7105	12.1868	10.1736	7.96382	8.28682	7.28682	6.94315	6.39276	6.63212	6.67959	8.48062	14.4367	16.3662	17.0681	20.6464	18.8439
	12	12.1	15.3508	12.4869	9.92228	8.20413	8.49612	8.8886	8.82687	7.67183	7.42636	7.22739	8.55814	12.7959	12.9922	13.1788	16.1995	13.8433
	13	11.0818	13.5457	12.3688	8.93523	7.75711	8.34367	9.27907	9.94832	8.94315	6.65116	6.37468	7.3385	10.1059	10.3204	10.4341	11.2591	10.2104
	14		11.8924	11.2831	9.94301	9.76104	8.37726	7.99742	9.77461	9.84755	9.39535	7.16279	6.77261	7.8553	8	8.15504	8.89091
	15			9.26562	8.99741	8.1974	7.38701	7.30311	8.47273	9.63896	8.69251	8.35917	8.02842	8.12403	7.2584	7.18394
	16							7.91969	7.12176	8.23057	7.21503	8.09819	9.42894	8.10594	7.5323
	17							6.39637	6.59845	5.52196	4.81137	5.82597	7.39793	7.7907
8	1					8.22849	11.5374	12.9383	15.5687	15.5383	13.8603	13.8279	20.8366	23.0219					8																		8
	2					13.7446	15.4048	17.0375	18.727	17.9779	16.7355	15.811	21.5207	21.8425	22.5651
	3			16.2129	16.9919	15.9569	16.2339	16.9593	19.0732	19.5753	17.0275	13.6823	14.721	17.1841	17.5055	16.708
	4		18.5202	19.3707	18.617	16.3306	17.2884	18.9838	21.9919	23.4423	22.0606	19.511	16.0138	15.9559	17.0904	17.1616	15.8038
	5	18.8453	22.8649	18.9227	15.7553	16.631	18.3262	20.5676	24.5136	27.3388	26.7575	23.1608	18.5562	17.8658	17.0797	18.4071	17.9344	14.4674
	6	18.7676	24.0968	19.0615	14.2255	15.1114	17.508	18.4745	23.6586	27.0515	27.891	23.2473	21.5951	21.0545	20.3945	20.4863	20.8497	16.5489
	7	15.3396	19.7224	16.6702	12.7723	12.0315	13.5092	15.0395	19.8333	23.626	24.8102	22.752	20.6378	21.2104	22.7808	23.1989	21.7984	17.547
	8	12.016	16.0747	15.0868	10.5419	8.92689	9.5	9.1201	10.7755	18.0836	19.2801	20.3005	21.379	20.0951	20.7885	21.6467	23.2745	16.8137
	9	11.2773	13.2219	13.1029	8.61097	6.27415	5.42559	4.8799	6.12827	8.8564	13.3734	16.1175	17.8311	19.563	20.1321	21.2923	23.4372	19.1063
	10	10.2587	13.7227	13.6736	7.91645	6.05483	5.7154	5.39948	5.42298	5.88251	8.96084	9.79319	12.9476	16.9392	19.382	22.124	22.4878	19.0761
	11	11.0667	13.6064	13.6982	10.2872	8.40731	8.53003	7.68407	7.02611	6.84073	7.47258	7.81984	9.3107	13.4278	15.8684	16.4005	19.8441	17.5984
	12	10.1883	13.4271	12.2785	10.6893	8.37859	8.89034	8.94503	8.78534	7.93717	8.04961	8.36815	9.07311	12.1545	13.0395	12.5564	15.8289	14.0265
	13	10.305	12.1538	11.9764	9.45431	7.56658	8.4047	9.07853	9.6466	8.88482	7.02872	7.35248	8.22775	10.4147	11.1447	10.9475	11.7034	10.3026
	14		11.4934	10.644	9.87696	9.4555	8.38642	7.90601	9.37173	9.28534	8.90339	7.11227	7.39791	9.05759	9.53018	8.82723	9.31496
	15			8.79843	8.39791	7.90314	7.1906	7.17232	8.26371	9.38381	8.62042	7.97906	7.93455	8.50785	7.57592	7.15144
	16							7.8822	6.92167	8.24346	7.26178	7.78272	9.08639	7.98168	7.37435
	17							6.57592	6.32723	5.4712	4.84817	5.53141	7.23298	7.75131
9	1					8.56693	9.62467	11.3123	13.9528	13.3963	13.0667	14.4075	23.7661	26.4113					9																		9
	2					13.7177	13.7704	14.7421	16.4377	17.2258	15.6005	16.0755	25.1159	25.3946	23.5256
	3			15.7032	16.3723	13.9524	13.7599	14.8753	17.0427	17.9274	16.5876	14.4946	16.5175	17.9353	16.3405	13.2776
	4		18.8525	19.5523	17.19	13.4553	13.8311	15.4085	19.0053	21.7796	21.4032	19.0701	15.9409	16.9866	16.3261	14.0349	13.6193
	5	17.9346	21.6693	18.3148	14.5673	14.277	16.0212	18.3103	21.8369	26.4297	26.1505	22.1075	18.6038	18.5526	18.8418	18.0322	17.1364	15.2761
	6	18.24	22.8249	17.055	13.2245	14.1073	16.4763	18.4881	23.2744	26.9947	28.7487	24.1769	22.9011	21.4316	22.5952	22.9812	22.941	18.7116
	7	15.4191	18.4512	15.3159	11.4062	12.4401	13.9634	15.9661	19.0286	23.3455	24.9337	24.7222	22.5159	22.016	22.9652	23.875	23.0243	19.7139
	8	13.6911	16.4751	14.1237	10.6335	9.47792	9.10363	9.03109	11.0855	16.9247	18.9505	21.0079	20.25	20.4683	21.3958	22.7757	25.9412	20.0081
	9	13.9295	16.0997	14.411	10.7552	7.67188	6.02591	5.24611	6.56218	9.43152	13.2	15.1891	18.0207	18.9424	19.6016	22.2619	24.7185	22.0703
	10	12.9293	16.3368	14.9291	10.6831	7.15584	6.43377	5.45455	5.79016	6.89664	9.99741	10.1034	12.101	16.8542	17.4127	21.5316	24.9813	22.508
	11	14.2487	16.6457	15.2913	11.9143	10.0468	10.0494	9.10881	8.5285	8.66839	8.56736	9.46373	10.6718	14.3049	15.6114	16.9062	18.7625	17.6667
	12	12.1253	14.8848	13.5366	11.4896	9.88372	10.0026	10.0648	10.1302	9.56736	9.47273	9.64416	10.987	13.6495	14.3808	14.1269	15.7403	13.5299
	13	11.178	13.5849	12.4883	9.49741	7.89922	8.56589	10.1085	10.7974	10.7003	7.82902	9.06977	9.63824	11.9794	11.7325	11.2338	10.9818	9.74352
	14		11.5654	11.2292	10.6364	9.5829	8.65974	8.28497	10.1503	10.3808	9.37824	8.21503	8.5	9.88083	9.50646	9.19171	8.97674
	15			9.5013	9.1943	8.5323	7.97416	7.7907	8.98187	9.63049	9.43152	9.05943	8.90181	9.33679	8.90439	7.74807
	16							7.87339	7.40052	8.48837	7.68217	8.39793	9.94574	8.8553	8.0285
	17							6.47545	6.24548	5.62953	5.15245	6.09585	7.42636	7.88372
10	1					8.56955	10.2775	11.3639	14.0787	13.4202	12.383	14.0483	22.5122	23.8108					10																		10
	2					15.3211	16.9739	17.5196	18.1746	17.312	15.984	17.8556	24.9947	24.6568	23.7358
	3			17.1526	17.5512	17.3053	17.6517	17.5397	18.2267	18.5618	18.7507	17.9093	19.9035	19.3102	18.9519	15.04
	4		21.5366	20.4483	20.0289	17.5198	17.2971	17.7772	20.9064	24.2086	24.2815	22.1787	20.2732	19.9677	19.2293	16.2299	14.0213
	5	17.893	22.2362	19.168	16.4278	17.3816	18.4921	20.4471	24.6525	27.5547	28.3797	25.4085	21.3644	22.0426	21.3477	19.8957	17.1618	14.3483
	6	19.3482	23.5958	18.2682	14.9792	16.7297	17.7664	19.9396	24.5209	27.6737	28.8413	25.4841	24.791	23.6303	23.3547	23.2747	20.8267	16.4388
	7	17.0868	20.4016	15.9948	12.2571	12.813	14.2753	16.6072	20.7927	23.3159	24.4319	23.4178	22.0052	22.2467	24.3404	23.2997	22.1702	17.5401
	8	15.1129	17.7356	14.9584	11.8708	10.5685	10.124	10.2154	11.8586	16.0207	17.1425	18.235	20.2644	19.7763	21.7711	22.3289	23.8942	18.4839
	9	14.4595	16.1073	14.5104	10.933	7.90746	6.02057	5.79434	7.70769	9.6838	13.4201	13.9716	16.0155	18.5314	20.1024	23.3377	25.9467	22.5054
	10	13.6667	17.5759	15.9326	10.3411	6.89433	6.44987	6.5347	6.80206	7.49614	9.8509	10.0823	12.1649	15.3264	17.6641	21.4331	25.9288	23.5942
	11	14.1627	17.6492	16.2946	12.1598	9.63239	9.29897	9.07216	8.94087	9.04897	8.96658	9.35219	9.8946	12.8398	14.6961	16.6312	20.3594	17.7277
	12	12.5875	16.6875	15.0233	11.9199	10.2268	9.52835	10.1465	10.0077	8.82732	9.55412	8.95103	10.3162	12.5553	13.2171	12.5077	14.4729	12.4935
	13	12.0938	14.2857	14.0259	10.549	9.53093	8.84536	9.55814	10.2171	9.57326	7.97172	8.73265	9.31105	10.9743	11.3282	11.0336	12.0771	10.832
	14		12.6078	12.7872	10.9845	10.3548	9.22423	8.93299	10.3402	10.2784	9.67609	7.8072	8.01542	9.21392	9.48711	9.16452	9.52577
	15			9.30077	8.75064	8.37018	7.88432	8.01285	9.05913	9.65206	9.1671	8.46015	8.7892	8.65553	7.84062	7.70437
	16							7.88175	7.30848	8.55155	7.77519	8.42784	9.29897	7.89948	6.88946
	17							6.58355	6.43959	6.00514	5.82519	6.44186	7.42159	7.07198

## Sheet: BT
NumberOfStartingPointsBT
Signals of insufficient quality were excluded from the property maps. Signals could be rejected based on noise low amplitude, large artefact or ventricluar farfields that could not be substracted. Breaktrough can only be identified if a contiguous circle of electrodes enclose the electrode of interest. Therefore electrodes at the border or around a missing electrodes are excluded.
	1	1	2	3	4	5	6	7	8	9	10	11	12	13	14	15	16	17
1	2																		1																		1
	3						6	7	3	4	2	13	8
	4						26	3	8	11	5	0	8	7
	5				7	10	10	6	60	6	6	5	3	3	8
	6			4	1	1	5	19	2	12	15	12	5	8	3	7
	7		3	7	11	12	2	16	4	5	6	8	3	6	5	5	18
	8		19	7	5	1	3	11	9	8	5	6	16	5	10	7	8
	9		6	5	27	4	4	10	3	5	1	1	6	6	15	13	10
	10		5	0	57	55	1	6	4	4	7	2	1	4	8	6	7
	11		2	8	67	60	12	14	13	9	35	3	0	2	4	5	12
	12		3	8	2	7	28	1	8	7	1	0	1	1	4	10	5
	13		3	5	0	1	1	3	3	2	2	0	4	3	3	5	12
	14			2	1	3	3	6	2	1	0	0	1	6	2	0
	15				1	0	7	13	3	2	1	0	1	2	4
	16						7	11	3	0	1	1	3	4
	17							3	0	2	0	0	0
	1
2	2																		2																		2
	3						10	2	3	2	0	4	2
	4						23	5	4	5	2	2	1	4
	5				11	7	8	6	64	8	1	1	2	3	5
	6			6	9	1	3	10	3	18	14	6	6	13	2	11
	7		7	6	8	10	1	11	1	7	12	9	4	7	4	4	17
	8		17	6	1	2	5	4	7	8	3	9	7	9	13	8	16
	9		10	1	20	4	3	20	2	0	4	2	6	12	10	14	12
	10		3	1	58	57	1	9	7	0	5	1	1	5	6	6	5
	11		0	15	85	51	10	13	23	9	43	0	0	2	3	6	9
	12		2	2	0	11	34	1	9	3	0	1	2	1	3	7	2
	13		2	2	0	0	3	1	1	0	1	2	1	1	2	2	15
	14			2	1	3	7	1	0	1	1	2	3	1	4	2
	15				1	1	13	6	1	0	0	1	1	2	4
	16						10	2	2	1	0	1	0	1
	17							1	1	1	1	1	1
	1
3	2																		3																		3
	3						7	5	3	2	2	6	6
	4						20	5	9	6	2	3	6	9
	5				10	6	5	10	76	10	8	2	1	3	4
	6			5	7	0	4	12	5	22	10	9	6	9	2	10
	7		12	12	13	12	1	17	5	9	4	5	1	10	3	3	17
	8		15	6	8	5	3	4	12	10	5	6	10	4	12	8	10
	9		6	2	30	5	3	15	4	3	1	2	9	10	14	10	8
	10		1	1	96	94	2	2	2	2	2	3	2	6	6	6	11
	11		1	17	102	86	17	8	14	9	41	0	0	3	1	5	7
	12		0	0	1	6	37	1	8	4	2	3	1	1	0	4	3
	13		1	0	1	1	2	3	3	0	1	3	4	2	1	2	2
	14			0	0	1	2	3	2	1	3	0	1	2	2	2
	15				0	0	6	8	5	1	0	1	0	1	0
	16						7	4	1	1	3	0	2	3
	17							2	0	0	1	0	0
	1
4	2																		4																		4
	3						7	3	3	0	1	8	4
	4						17	3	9	7	1	2	8	6
	5				9	5	5	3	77	14	4	3	2	4	9
	6			4	4	6	3	10	5	19	9	4	5	15	4	15
	7		8	4	9	11	2	18	9	11	8	5	9	6	7	12	17
	8		24	4	2	3	8	7	9	15	8	6	10	3	12	8	8
	9		8	1	21	4	5	10	2	4	1	5	5	18	8	23	9
	10		2	1	74	76	2	9	13	5	10	0	2	8	6	8	5
	11		0	8	90	67	8	7	22	15	38	0	2	2	2	3	3
	12		5	2	1	5	30	0	10	1	0	0	3	3	3	9	3
	13		3	2	1	2	3	1	1	0	0	2	4	0	2	3	5
	14			1	0	1	3	1	1	0	2	0	1	3	8	2
	15				0	2	3	9	1	2	0	0	1	5	4
	16						10	3	3	2	2	1	1	0
	17							1	1	1	0	2	0
	1
5	2																		5																		5
	3						11	2	3	5	2	5	5
	4						17	6	14	7	5	3	0	3
	5				6	6	5	5	72	12	13	5	3	5	7
	6			4	10	0	3	10	2	19	12	7	7	9	6	6
	7		7	6	14	10	3	11	7	16	5	12	6	6	5	1	10
	8		12	5	5	4	4	6	8	7	10	2	14	5	12	6	12
	9		7	0	22	1	2	19	6	2	0	0	8	14	15	15	5
	10		2	1	85	77	2	6	10	4	10	0	1	5	5	7	6
	11		1	12	103	75	19	9	20	13	52	1	1	2	2	1	5
	12		0	0	2	10	39	0	10	1	1	0	2	1	1	8	1
	13		2	0	0	1	1	0	4	0	0	0	3	1	2	4	2
	14			1	0	0	4	2	0	0	1	3	0	0	4	2
	15				0	0	3	5	2	1	0	0	1	0	3
	16						8	4	2	2	1	0	2	1
	17							3	1	0	0	0	0
	1
6	2																		6																		6
	3						11	0	2	2	3	3	5
	4						21	2	5	4	1	2	1	0
	5				6	3	3	6	67	12	4	4	3	3	4
	6			5	1	4	2	10	2	15	9	4	6	14	3	6
	7		17	9	12	11	1	11	3	6	4	2	3	2	5	5	15
	8		24	10	4	1	1	6	3	8	9	3	8	3	8	8	9
	9		1	0	24	2	4	20	0	1	2	4	5	7	12	15	8
	10		1	0	83	70	0	11	16	1	3	0	2	6	7	6	6
	11		1	7	85	65	10	16	28	15	53	2	0	2	4	4	3
	12		1	0	1	13	44	1	13	5	1	0	3	0	2	6	3
	13		2	1	2	0	0	2	4	0	0	1	1	1	1	1	9
	14			1	1	4	4	3	0	0	0	0	0	2	3	4
	15				0	1	5	2	1	1	0	0	1	2	1
	16						11	4	1	2	1	0	0	2
	17							0	0	0	3	0	1
	1
7	2																		7																		7
	3						9	4	4	4	1	8	10
	4						22	2	11	4	4	5	3	3
	5				8	5	4	2	67	13	6	5	3	3	3
	6			3	6	1	6	15	2	15	11	6	6	14	5	8
	7		10	8	9	6	4	29	5	9	8	7	3	3	7	8	15
	8		18	7	2	3	7	6	9	11	7	9	10	6	13	7	9
	9		4	0	27	4	7	13	4	3	0	4	10	10	9	14	6
	10		0	2	91	91	1	12	10	3	2	0	2	1	8	6	5
	11		0	12	98	74	19	17	34	16	42	0	1	1	2	5	3
	12		0	2	2	10	39	3	11	4	1	1	1	0	1	6	6
	13		2	3	1	3	2	0	0	2	1	0	3	1	2	1	5
	14			1	2	1	2	2	0	1	0	0	0	2	3	2
	15				0	1	5	9	3	1	1	1	0	3	3
	16						6	3	3	1	1	1	1	2
	17							0	0	0	0	0	0
	1
8	2																		8																		8
	3						17	3	2	2	1	4	10
	4						22	2	5	7	5	2	3	4
	5				12	5	2	6	55	7	9	5	2	6	7
	6			2	4	2	4	16	4	8	13	8	6	16	5	9
	7		9	6	15	12	1	22	6	5	5	5	5	5	3	2	15
	8		20	6	1	2	3	7	11	14	7	7	8	2	12	8	8
	9		7	4	24	1	1	18	4	1	3	1	12	11	9	11	11
	10		0	1	73	65	0	4	9	6	4	1	4	6	6	8	5
	11		0	12	83	62	6	10	21	19	49	0	1	4	2	4	7
	12		3	0	2	7	30	0	12	7	1	0	2	2	4	3	3
	13		1	1	0	2	1	0	3	0	0	1	2	3	3	5	8
	14			1	1	2	3	0	0	0	0	0	1	3	7	3
	15				0	3	6	6	1	0	0	0	0	5	6
	16						6	3	2	1	1	0	0	2
	17							1	0	0	0	0	0
	1
9	2																		9																		9
	3						15	1	1	3	1	6	5
	4						18	3	10	6	1	1	2	2
	5				8	2	4	2	62	14	11	1	3	6	3
	6			5	3	3	3	14	4	14	13	7	5	7	4	6
	7		10	6	17	12	2	23	7	9	7	4	4	4	4	5	23
	8		20	8	0	4	7	13	9	5	7	5	8	4	10	11	6
	9		6	1	20	3	3	16	1	0	1	2	8	6	14	14	10
	10		2	1	81	72	0	5	6	0	5	3	2	2	7	12	11
	11		2	18	73	58	12	8	20	9	39	2	1	1	2	5	2
	12		3	2	1	10	24	2	4	1	0	1	3	1	2	4	3
	13		3	2	0	3	1	2	6	1	0	1	0	4	1	1	7
	14			1	1	1	1	1	0	2	1	1	1	2	1	3
	15				0	2	9	5	0	0	0	0	3	3	3
	16						7	7	1	0	0	0	0	1
	17							2	0	0	0	0	0
	1
10	2																		10																		10
	3						13	7	3	5	2	4	6
	4						26	5	4	7	2	5	4	4
	5				6	5	2	5	44	7	8	5	6	4	7
	6			4	11	3	4	15	3	14	17	11	4	7	5	7
	7		8	7	10	8	1	15	3	12	2	9	3	4	12	3	15
	8		19	8	7	5	3	8	8	11	7	4	10	4	11	7	8
	9		2	4	25	2	5	17	1	0	2	2	7	13	12	12	14
	10		2	1	62	48	1	7	6	3	3	1	4	5	4	8	6
	11		0	12	71	45	9	12	20	17	32	1	2	2	3	5	4
	12		0	3	2	12	30	2	8	4	1	1	2	3	3	4	3
	13		2	4	2	6	2	4	1	0	1	4	5	5	3	5	4
	14			3	3	2	6	1	0	1	0	1	3	9	6	4
	15				1	1	9	10	4	1	0	0	2	1	0
	16						9	5	3	0	3	0	0	0
	17							1	1	1	1	0	0

## Sheet: FI
FractionationIndices
Signals of insufficient quality were excluded from the property maps. Signals could be rejected based on noise low amplitude, large artefacts or ventricluar farfields that could not be substracted. Fractionation index is particularly sensitive to noise. Therefore electrodes with substantial noise are more strictly excluded.
		1	2	3	4	5	6	7	8	9	10	11	12	13	14	15	16	17
1	1					1.08753	0.777778	0.280423	0.875661	0.840849	1.09409	1.20109	2.61475	3.13425					1																		1
	2					0.539894	0.880952	0.789474	0.815508	0.591892	0.41779	0.410326	1.34054	2.14169	2.3388
	3			1.46791	1.25	0.906915	0.81117	0.764706	0.820856	0.572581	0.606469	0.316216	1.00817	1.06557	1.22493	1.10724
	4		1.8172	1.79733	0.928571	0.811671	1.016	0.907162	1.408	1.90323	1.55738	0.873973	0.520325	0.583106	0.762943	0.865591	1.47967
	5	1.04762	2.26005	1.87533	1.19789	0.921053	1.55556	1.36675	1.76984	2.80707	2.297	1.72877	1.17935	1.2981	1.19565	1.01887	1.23706	2.2038
	6	2.03723	2.18519	1.979	1.28272	1.2376	1.51969	1.52646	1.61538	1.83646	2.10243	1.79515	1.30245	0.872283	1.5765	1.26975	1.3079	1.97838
	7	2.38032	2.35279	1.61053	1.63446	1.51706	1.62042	1.28609	1.69841	1.55026	1.42819	0.92328	1.60695	1.77568	1.82834	1.51902	1.43243	2.10243
	8	1.38889	1.56464	1.5853	1.0288	1.19321	1.22193	0.994778	1.08115	0.945026	1.32808	0.968421	1.56915	1.68717	1.60695	1.42473	1.72776	2.07902
	9	1.04762	1.30526	1.17585	0.897906	1.11257	0.97644	0.875325	1.01567	0.64752	0.811518	0.582245	0.615183	1.47884	1.61702	1.9492	1.95135	2.08152
	10	0.775726	2.15567	0.763158	0.58377	0.804178	0.851175	0.594805	0.608355	0.626632	0.480418	0.269634	0.356021	1.01323	1.54047	1.64908	2.07181	2.176
	11	0.608466	0.603175	0.850785	0.698953	0.994778	1.16971	1.13089	1.00783	0.759791	0.657068	0.471204	0.206266	0.694517	1.4147	1.4252	1.61804	1.72487
	12	0.466844	0.727034	0.877285	0.622047	0.968668	1.24934	1.32808	1.08877	0.791123	0.749347	0.679688	0.643979	1.10417	1.39108	1.14398	1.26963	1.27559
	13	0.390501	0.548813	0.513158	0.196335	0.47644	0.723238	1.23499	0.958115	0.872063	0.535248	0.281984	0.344648	1.02597	1.27415	1.06266	1.20681	1.18635
	14		0.736148	0.259162	0.198953	0.562827	0.594241	0.719895	0.780679	0.918848	0.601562	0.21875	0.0963542	0.151436	0.507812	0.681462	0.913838
	15			0.39267	0.438642	0.146597	0.125654	0.264398	0.442408	0.685864	0.699739	0.362924	0.283854	0.232376	0.255208	0.464752
	16				0.12336	0.212042	0.509186	0.657068	0.544503	0.380577	0.571802	0.387435	0.373368	0.387435	0.28534
	17						0.387435	0.331593	0.366492	0.277487	0.18799	0.24282	0.308094	0.397906
2	1					1.09091	0.696335	0.248691	1.13684	0.669312	1.21024	1.07258	2.70523	3.17213					2																		2
	2					0.490862	0.897638	0.765789	0.971053	0.712	0.384409	0.443243	1.28378	1.89373	2.17711
	3			1.80688	1.27778	1.18373	0.971129	0.92126	0.784211	0.685333	0.597855	0.402703	1.09459	0.97019	1.20109	0.983696
	4		2.13456	2.15831	0.95288	0.96063	1.12434	1.10554	1.46966	1.936	1.54178	0.818919	0.490515	0.538043	0.659459	0.804348	1.3027
	5	1.48556	2.33598	1.93734	1.24935	0.992248	1.62205	1.50656	1.94974	2.63271	2.33602	1.6586	1.1752	1.15946	1.09485	0.90027	1.13208	2.10753
	6	2.26455	2.31152	2.04688	1.2026	1.23834	1.55039	1.57812	1.74278	2.04775	2.02949	1.57527	1.34584	0.965054	1.3941	1.29268	1.28954	1.97059
	7	2.69312	2.39791	1.64675	1.60881	1.52591	1.73247	1.37209	1.85233	1.59115	1.38158	1.06631	1.55319	1.62933	1.58177	1.63342	1.63243	2.21563
	8	1.54712	1.63636	1.55208	0.911688	1.11979	1.26166	1.04145	1.09561	1.11399	1.45431	1.02094	1.53034	1.4867	1.42933	1.21123	1.58919	2.15364
	9	1.47644	1.42298	1.15927	0.694301	0.956072	1.01809	0.831606	0.935401	0.533505	0.703608	0.697674	0.662338	1.5277	1.52394	1.68533	1.81452	2.09704
	10	0.806789	1.16754	0.546875	0.472868	0.632124	0.707254	0.474093	0.423773	0.449612	0.449612	0.25	0.284974	0.974026	1.66316	1.71504	2.13636	2.25067
	11	0.557895	0.440945	0.579221	0.443005	0.748705	0.968912	0.919481	0.844961	0.540052	0.485788	0.346253	0.139175	0.643411	1.57662	1.53281	1.8	1.81283
	12	0.414698	0.569191	0.760417	0.537468	0.705426	1.10594	1.16796	0.974093	0.532468	0.485714	0.394805	0.428941	1.00779	1.49741	1.23037	1.3099	1.4282
	13	0.44357	0.488189	0.40625	0.18863	0.403101	0.622739	1.19171	0.831606	0.759067	0.378238	0.205195	0.2	0.741514	1.16146	1.11198	1.31429	1.36719
	14		0.711286	0.197403	0.246114	0.624352	0.560724	0.738342	0.756477	0.930052	0.466321	0.135065	0.0571429	0.0987013	0.38342	0.782946	1.06234
	15			0.381443	0.511628	0.18863	0.173127	0.322997	0.396373	0.69171	0.647668	0.339378	0.225389	0.192208	0.222798	0.437824
	16				0.137306	0.165375	0.50646	0.589147	0.541451	0.397403	0.474093	0.365285	0.427461	0.318653	0.316062
	17						0.458549	0.445596	0.551813	0.187013	0.168394	0.129534	0.397403	0.651948
3	1					0.857909	0.561497	0.282667	0.900804	0.48248	1.17027	1.16531	2.64481	3.20055					3																		3
	2					0.418667	0.749333	0.757333	0.991935	0.630728	0.390244	0.39782	1.2752	1.83747	2.22253
	3			1.48257	1.1689	0.975806	0.790885	0.735849	0.78877	0.717742	0.644022	0.326087	0.89589	0.861035	1.1044	1.02459
	4		1.94906	2.02688	0.775401	0.799465	0.914439	1.04021	1.42588	1.86253	1.61475	0.833333	0.557377	0.550409	0.547684	0.722071	1.44809
	5	1.36	2.07796	1.85791	1.03191	0.757333	1.37968	1.30831	1.73925	2.73854	2.24661	1.56911	1.23161	1.12228	0.912568	0.853659	1.11413	2.2459
	6	1.8262	2.05108	1.68984	0.992042	0.907162	1.3634	1.59309	1.71011	1.84906	2.06183	1.64674	1.13859	0.777778	1.47011	1.10627	1.26558	2.0027
	7	2.24731	1.904	1.37203	1.36675	1.23747	1.59631	1.40849	1.69312	1.3905	1.21809	0.848	1.40642	1.55676	1.64054	1.59563	1.54768	2.11321
	8	1.1383	1.28117	1.25995	0.591029	0.839474	1.07632	1.03421	1.09474	0.806366	1.26842	0.992063	1.42706	1.47074	1.3504	1.19022	1.74387	1.97534
	9	0.851459	0.93883	0.693931	0.422164	0.707895	0.955381	0.637795	0.627968	0.412073	0.67979	0.662304	0.610526	1.32267	1.30027	1.72386	1.90811	2.00542
	10	0.639257	0.920635	0.302632	0.322835	0.424084	0.611549	0.375328	0.322835	0.35958	0.401575	0.178478	0.226316	0.912698	1.68966	1.61765	1.90566	2.0027
	11	0.38992	0.365079	0.428947	0.272966	0.548556	0.832021	0.766404	0.690289	0.461942	0.316754	0.207349	0.120419	0.692105	1.46561	1.47872	1.53495	1.60054
	12	0.453333	0.569149	0.567639	0.391076	0.540682	0.952756	0.887435	0.716535	0.448819	0.332461	0.314961	0.328947	1.01579	1.36412	1.14021	1.13984	1.31117
	13	0.328912	0.390501	0.301837	0.12336	0.430446	0.582677	1.01837	0.713911	0.694737	0.297368	0.0921053	0.118421	0.635884	1.03158	1.10818	1.32895	1.16359
	14		0.730159	0.199475	0.312336	0.778947	0.665789	0.530343	0.588391	0.815789	0.492105	0.131579	0.0447368	0.0947368	0.307895	0.635884	1.02902
	15			0.430079	0.457895	0.0815789	0.0815789	0.236842	0.352632	0.56168	0.594737	0.255263	0.231579	0.171053	0.189474	0.460526
	16				0.139474	0.218421	0.607895	0.668421	0.542105	0.3	0.372703	0.252632	0.378947	0.403694	0.286842
	17						0.457895	0.402632	0.596306	0.160526	0.134211	0.102632	0.257895	0.467018
4	1					1.00792	0.650919	0.257218	0.873684	0.769231	1.17251	1.29032	2.63881	3.00271					4																		4
	2					0.356955	0.771053	0.691293	1.07124	0.706667	0.413333	0.419786	1.3172	1.92992	2.01344
	3			1.67374	1.30667	1.17196	0.88189	0.798942	0.762533	0.687166	0.592	0.369973	0.925134	0.818182	1.05333	0.917553
	4		2.08466	1.98118	0.944591	1.03439	1.12698	1.18997	1.53581	1.79947	1.54155	0.846361	0.446524	0.627346	0.598404	0.771277	1.39733
	5	0.792651	2.15608	1.84697	1.14621	1.10526	1.63684	1.5409	2.03989	2.6206	2.14209	1.70588	1.312	1.28075	0.989305	0.960106	1.11376	2.08021
	6	1.92838	2.30053	1.85039	1.13351	1.07592	1.45144	1.53298	1.64752	2.07937	2.14362	1.66227	1.32713	0.94385	1.53067	1.05851	1.18302	1.93899
	7	2.43272	2.32632	1.5625	1.66753	1.40992	1.59481	1.45195	1.67624	1.47258	1.27105	0.792651	1.36939	1.55937	1.59151	1.38992	1.46419	2.09677
	8	1.35433	1.61579	1.58947	1.01295	1.06718	1.1137	1.14987	1.09845	0.984456	1.24935	0.898438	1.60733	1.61257	1.58047	1.32718	1.72606	2.00267
	9	1.00783	1.24147	1.15325	0.75	0.96134	1.02577	0.791237	0.938144	0.548969	0.742268	0.615979	0.476804	1.46354	1.45	1.84252	1.90186	1.95225
	10	0.732984	1.19792	0.652062	0.586563	0.675258	0.829897	0.502577	0.451031	0.497423	0.484536	0.191214	0.224227	0.935401	1.44271	1.55643	1.97606	2
	11	0.541885	0.528796	0.773196	0.528351	0.757732	1.14212	1.01031	0.868557	0.641753	0.53866	0.373711	0.157216	0.829897	1.42931	1.38381	1.56955	1.6
	12	0.440945	0.646597	0.723958	0.540052	0.721649	1.06701	1.26357	0.883721	0.632124	0.510309	0.509044	0.485788	1.12629	1.33247	0.953368	1.32898	1.31771
	13	0.36911	0.402632	0.354922	0.134021	0.43299	0.610825	1.09794	0.836788	0.774611	0.373711	0.126289	0.164948	0.768041	1.08505	1.05959	1.2513	1.0829
	14		0.746736	0.188144	0.255814	0.658915	0.57732	0.627907	0.735751	0.826873	0.613402	0.17268	0.0335052	0.0829016	0.349741	0.565891	1.06977
	15			0.353093	0.420103	0.0695876	0.0670103	0.286082	0.356589	0.611399	0.661499	0.309278	0.309278	0.21134	0.211886	0.377261
	16				0.139175	0.204134	0.587629	0.705426	0.618557	0.395349	0.487047	0.312661	0.399485	0.324742	0.204134
	17						0.386598	0.361757	0.447028	0.208763	0.139175	0.105943	0.301546	0.466495
5	1					1.06101	0.679894	0.261905	1.05585	0.72973	1.15217	1.06575	2.50829	3.17808					5																		5
	2					0.566489	0.870027	0.729443	1.13941	0.712737	0.346049	0.316076	1.20055	1.88187	2.18904
	3			1.69565	1.16043	1.04813	1.07487	0.911765	0.844086	0.666667	0.605978	0.405995	0.850136	0.79235	1.06831	0.904632
	4		1.98645	1.79032	0.861333	0.930481	1.03753	1.13941	1.40701	1.84054	1.59511	0.872283	0.498638	0.430518	0.561308	0.730978	1.17663
	5	1.24533	2.26558	1.93784	1.19733	0.917333	1.54011	1.59409	1.94324	2.70219	2.36512	1.71196	1.25	1.08152	0.997275	0.804878	0.92973	1.99458
	6	2.27224	2.29839	1.82368	1.16402	1.05291	1.30423	1.49072	1.625	1.98652	2.03243	1.60916	1.41192	0.848649	1.5	1.19837	1.19783	1.92603
	7	2.62032	2.24259	1.46702	1.50265	1.48285	1.77309	1.3089	1.57632	1.28989	1.12766	0.812834	1.29032	1.51622	1.68564	1.58266	1.60054	2.20548
	8	1.28457	1.49072	1.36508	0.772251	0.981579	1.1601	0.971279	1.02611	0.86423	1.19577	0.777188	1.352	1.48128	1.39189	1.26287	1.72603	2.08767
	9	1.01596	1.30933	0.95	0.625654	0.89295	1.00261	0.73107	0.72846	0.430809	0.662304	0.644737	0.514512	1.313	1.2681	1.66396	1.86649	2.03867
	10	0.672	0.876676	0.345646	0.319372	0.475196	0.698953	0.4047	0.383812	0.412533	0.436031	0.141361	0.209424	0.82058	1.60422	1.60695	2.04065	2.22131
	11	0.472	0.338667	0.386842	0.318538	0.652742	0.929504	0.934555	0.793734	0.548303	0.436031	0.206266	0.0678851	0.536842	1.44855	1.3905	1.67647	1.76757
	12	0.380319	0.505319	0.566489	0.389474	0.629921	1.0288	1.07068	0.955497	0.486911	0.410995	0.308094	0.292428	0.963446	1.35884	1.09788	1.19261	1.39947
	13	0.399471	0.378307	0.278215	0.152231	0.374346	0.573298	1.20681	0.905512	0.747368	0.327225	0.162304	0.13089	0.633508	1.07853	1.03958	1.30079	1.29737
	14		0.688654	0.152231	0.254593	0.726316	0.623037	0.698163	0.774278	0.810526	0.456693	0.133858	0.0314136	0.0628272	0.335079	0.698163	1.12929
	15			0.396325	0.538058	0.165354	0.115486	0.270341	0.348168	0.645669	0.565445	0.287958	0.221053	0.130548	0.174935	0.471204
	16				0.0787402	0.186352	0.560209	0.691099	0.67801	0.39895	0.463351	0.319372	0.370079	0.371053	0.343832
	17						0.541885	0.489529	0.693717	0.175393	0.136126	0.117801	0.293963	0.498688
6	1					0.94695	0.591029	0.296296	0.838196	0.605333	1.01344	1	2.53533	3.25706					6																		6
	2					0.399464	0.835979	0.671088	0.941019	0.655914	0.321716	0.295699	1.20811	2.10656	2.15512
	3			1.5393	1.22372	1.08356	0.831099	0.847594	0.775401	0.719677	0.701613	0.443243	0.940701	0.807588	1.0929	0.959239
	4		1.67292	1.8645	0.787234	0.776	0.804813	0.997333	1.43514	1.70541	1.4086	0.831522	0.459459	0.508152	0.752717	0.779891	1.27596
	5	0.92328	1.96216	1.63003	1.0984	1.06933	1.2815	1.29759	1.69755	2.74302	2.11989	1.65041	1.31436	1.15531	1.03514	0.777174	0.975543	2.06812
	6	1.90909	2.28997	1.74005	1.07407	1.03183	1.27394	1.26203	1.3369	1.58242	1.84906	1.42432	1.18478	0.626703	1.37978	1.15385	1.15489	1.97814
	7	2.21925	1.88533	1.41207	1.4042	1.35263	1.61579	1.11053	1.4127	1.27321	1.016	0.669333	1.29032	1.46341	1.4538	1.36438	1.47826	2.28532
	8	1.28421	1.31926	1.08684	0.631579	0.882199	1.07592	0.895288	1.01309	0.921466	1.1847	0.952128	1.43164	1.36785	1.33424	1.22222	1.70027	2.09392
	9	0.907652	0.907407	0.71504	0.417323	0.71466	0.918848	0.657068	0.790576	0.390052	0.617801	0.628272	0.604712	1.38235	1.39189	1.86486	1.86179	2.03836
	10	0.571429	0.751323	0.32021	0.259162	0.387435	0.667539	0.479058	0.395288	0.374346	0.400524	0.141361	0.209974	0.83727	1.60638	1.70699	2.01084	2.08152
	11	0.299735	0.293651	0.469816	0.32199	0.594241	0.879581	0.712042	0.685864	0.505236	0.363874	0.243455	0.136126	0.637795	1.46316	1.41379	1.51075	1.63388
	12	0.331565	0.515873	0.5	0.387435	0.520942	0.986911	0.89267	0.693717	0.41623	0.332461	0.316754	0.36911	1.03937	1.34383	0.947368	1.18302	1.29708
	13	0.334218	0.35809	0.332461	0.123037	0.337696	0.52356	1.07853	0.693717	0.725131	0.335079	0.128272	0.170157	0.641361	1.01055	1.01847	1.21693	1.15789
	14		0.708223	0.128272	0.327225	0.753927	0.643979	0.552356	0.653543	0.798429	0.562827	0.138743	0.0418848	0.065445	0.277487	0.572178	0.981579
	15			0.400524	0.460733	0.0628272	0.0549738	0.240838	0.311518	0.616798	0.65445	0.308901	0.256545	0.201571	0.167539	0.377953
	16				0.0994764	0.204188	0.649215	0.717277	0.602094	0.34555	0.409449	0.287958	0.370079	0.36911	0.259162
	17						0.440945	0.39267	0.544503	0.172775	0.104712	0.0971129	0.240838	0.486911
7	1					1.00264	0.563158	0.253298	0.933862	0.662234	1.12903	1.10753	2.58791	3.06557					7																		7
	2					0.537234	0.902116	0.783069	0.962865	0.645161	0.389785	0.389785	1.33696	1.86849	2.16894
	3			1.66129	1.23077	1.06101	0.877984	0.901333	0.762667	0.564171	0.691689	0.512195	0.86376	0.827027	1.11382	0.972973
	4		1.97319	1.94385	0.884514	0.978836	0.970899	1.15385	1.59043	1.73458	1.58919	0.95082	0.559783	0.477089	0.692098	0.74124	1.28261
	5	1.18158	2.34409	1.86684	1.23499	1.01305	1.57853	1.59631	2.06897	2.66848	2.27248	1.82192	1.40164	1.21622	0.98103	0.751351	0.918919	1.98919
	6	2.32	2.42971	1.99217	1.1849	1.16406	1.42037	1.51175	1.52368	1.82038	2.08086	1.78378	1.35422	0.946092	1.61247	1.02695	1.21622	1.86721
	7	2.56533	2.23421	1.51823	1.47927	1.34286	1.58961	1.31332	1.5013	1.51047	1.30343	0.742706	1.35925	1.50806	1.52022	1.43127	1.44086	2.14785
	8	1.53806	1.5582	1.3342	0.828125	0.937984	1	1.01292	1.00258	0.888601	1.19271	0.942105	1.56201	1.432	1.45308	1.25469	1.70161	2.16216
	9	1.16053	1.18997	0.818182	0.578811	0.75969	0.925065	0.749354	0.73385	0.416021	0.637306	0.595855	0.578125	1.35958	1.48413	1.77454	1.83378	2.10326
	10	0.707895	0.915567	0.421189	0.397933	0.488372	0.640827	0.439276	0.385013	0.390181	0.393782	0.170543	0.18863	0.966234	1.64474	1.73333	1.93067	1.93583
	11	0.44591	0.394737	0.502632	0.362694	0.604651	0.919897	0.829457	0.803618	0.488372	0.391192	0.276486	0.144703	0.744186	1.46753	1.56283	1.67282	1.7672
	12	0.431579	0.602094	0.568063	0.463731	0.614987	1.06718	1.02332	0.844961	0.459948	0.372093	0.335917	0.403101	1.05168	1.50777	1.17617	1.32124	1.46736
	13	0.498681	0.4047	0.332468	0.15285	0.392765	0.630491	1.0491	0.837209	0.73385	0.276486	0.0956072	0.111111	0.614987	0.979328	1.13437	1.38083	1.25974
	14		0.80315	0.205195	0.334197	0.745455	0.573643	0.640827	0.782383	0.919897	0.472868	0.111111	0.0387597	0.0852713	0.286822	0.568475	1.15584
	15			0.354167	0.455959	0.122078	0.12987	0.264249	0.38961	0.753247	0.677003	0.341085	0.27907	0.180879	0.193798	0.463731
	16				0.12987	0.225974	0.625974	0.774611	0.660622	0.396373	0.427461	0.333333	0.400517	0.410853	0.343669
	17						0.444156	0.34715	0.585492	0.175711	0.149871	0.0857143	0.263566	0.516796
8	1					0.948925	0.628342	0.273458	1.0593	0.631148	1.16712	1.04645	2.37673	2.9726					8																		8
	2					0.41129	0.847185	0.640751	0.891892	0.48895	0.286501	0.350685	1.06061	1.66575	2.03039
	3			1.56065	1.09164	1.01078	0.862903	0.712737	0.677507	0.50411	0.619835	0.428177	0.734807	0.642857	1.0442	0.818182
	4		1.90836	1.76267	0.776596	0.768817	0.989218	0.991914	1.29268	1.70879	1.48209	0.881868	0.37741	0.393939	0.564384	0.693151	1.22343
	5	1.12	2.13784	1.65067	0.986702	0.97861	1.43048	1.44865	1.72283	2.58953	2.08447	1.6049	1.13973	1.05753	0.876374	0.762295	0.928962	1.9212
	6	1.90541	2.18548	1.72727	1.0504	0.920424	1.20213	1.2681	1.40323	1.87805	1.78202	1.43207	1.1712	0.841962	1.35342	1.12912	1.20219	1.78533
	7	2.22102	1.99191	1.40369	1.34555	1.33333	1.60892	1.16053	1.45238	1.35279	1.08556	0.690027	1.31351	1.53552	1.51507	1.50409	1.41689	2.03039
	8	1.2139	1.312	1.27632	0.790576	1	1.12827	0.963446	0.966057	0.81201	1.14398	0.827128	1.44892	1.43207	1.4533	1.23641	1.49728	1.90685
	9	0.901333	1.0615	0.854881	0.563969	0.921671	0.953003	0.710183	0.774869	0.446475	0.642298	0.569191	0.51715	1.27346	1.43396	1.83607	1.80874	1.86649
	10	0.656	0.896	0.370757	0.336815	0.527415	0.689295	0.524804	0.420366	0.480418	0.402089	0.183246	0.251309	0.809524	1.48276	1.59838	1.92141	2.08696
	11	0.418667	0.398936	0.459318	0.365535	0.725849	0.94517	0.851175	0.86423	0.644909	0.467363	0.250653	0.0939948	0.543307	1.40526	1.46419	1.55376	1.59299
	12	0.342175	0.559682	0.525199	0.430809	0.686684	1.02089	1.01832	0.853403	0.536649	0.475196	0.417755	0.417755	0.924084	1.41053	1.09449	1.25789	1.30952
	13	0.29443	0.302387	0.249344	0.122715	0.399478	0.72846	1.10733	0.874346	0.767016	0.391645	0.177546	0.162304	0.690289	1.07105	1.09974	1.27297	1.31053
	14		0.564987	0.13089	0.282723	0.65445	0.642298	0.610966	0.780105	0.897906	0.524804	0.13577	0.0602094	0.0968586	0.343832	0.651832	1.05249
	15			0.303665	0.465969	0.109948	0.101828	0.245431	0.368146	0.642298	0.685864	0.319372	0.282723	0.212042	0.230366	0.449086
	16				0.102094	0.175393	0.568063	0.683246	0.579634	0.484293	0.502618	0.319372	0.45288	0.361257	0.303665
	17						0.442408	0.434555	0.568063	0.232984	0.149215	0.146597	0.379581	0.615183
9	1					0.981627	0.737533	0.251969	0.860892	0.654255	1.15733	0.935657	2.33065	2.96524					9																		9
	2					0.427441	0.741425	0.660526	0.771883	0.553763	0.265416	0.304582	1.20216	1.92703	2.09973
	3			1.46257	1.19415	1.02116	0.794195	0.763926	0.682667	0.545699	0.673854	0.386486	0.74124	0.757412	1.0563	1.02156
	4		2.02145	1.85255	0.878628	0.863158	0.978892	0.973475	1.33867	1.77151	1.45968	0.897574	0.459677	0.481183	0.67655	0.69086	1.34316
	5	1.16492	2.09259	1.82275	1.27177	1.12929	1.5582	1.46154	1.99198	2.81081	2.26075	1.48387	1.14286	1.05121	1.06702	0.806971	1.02139	2.17694
	6	2.14933	2.11936	1.87435	1.20627	1.16492	1.32105	1.52243	1.67546	1.74339	1.88503	1.69169	1.16578	0.868633	1.61394	1.12332	1.23592	2.09164
	7	2.4244	2.22164	1.51175	1.40885	1.35677	1.60313	1.2376	1.67969	1.53141	1.29443	0.854497	1.43122	1.64267	1.53209	1.4734	1.58919	2.3262
	8	1.4555	1.66404	1.42632	0.814136	1.0961	1.15285	1.03886	1.05959	0.994805	1.19531	0.856021	1.64737	1.56614	1.37995	1.08971	1.70053	2.13821
	9	1.16188	1.24934	0.968586	0.651042	1.02344	1.01036	0.727979	0.823834	0.511628	0.72987	0.608808	0.559585	1.51309	1.45119	1.6746	1.86059	2.15135
	10	0.82199	1.18421	0.433071	0.436364	0.737662	0.831169	0.541451	0.468912	0.4677	0.497409	0.224227	0.243523	0.778646	1.62434	1.66579	1.97333	2.19519
	11	0.434555	0.503937	0.614173	0.506494	0.784416	1.01558	1.01554	0.857513	0.639896	0.536269	0.38342	0.175711	0.612403	1.44301	1.42708	1.74406	1.75661
	12	0.4047	0.536649	0.528796	0.450521	0.741602	1.09044	1.12435	0.992188	0.676166	0.569948	0.483117	0.523316	0.925258	1.3342	1.07772	1.23896	1.28312
	13	0.361257	0.342037	0.32376	0.134715	0.459948	0.643411	1.15245	0.85974	0.865633	0.453368	0.219638	0.245478	0.739691	1.0987	1.07013	1.28571	1.14767
	14		0.65445	0.164062	0.290909	0.668394	0.672727	0.642487	0.803109	0.911917	0.525907	0.19171	0.0595855	0.158031	0.372093	0.598446	1.02067
	15			0.376623	0.430052	0.108527	0.134367	0.333333	0.450777	0.674419	0.645995	0.297158	0.294574	0.212435	0.222222	0.437018
	16				0.155844	0.215026	0.534884	0.625323	0.555556	0.452196	0.5323	0.356589	0.325581	0.377261	0.287565
	17						0.421189	0.403101	0.496124	0.240933	0.167959	0.132124	0.354005	0.50646
10	1					1.04462	0.641361	0.225131	0.871391	0.643617	0.968085	1.08043	2.39566	2.92703					10																		10
	2					0.506527	0.91906	0.770235	0.769841	0.608	0.375	0.42246	1.20321	1.71314	2.07817
	3			1.58158	1.2231	1.15789	1.06332	0.928571	0.754667	0.553763	0.689008	0.442667	0.849866	0.778075	1.03476	1.01333
	4		1.99476	1.96286	1.00262	0.891821	1.00796	1.00531	1.47059	1.85829	1.66488	0.898667	0.490716	0.634409	0.674667	0.778075	1.39894
	5	1.24021	2.04462	1.84777	1.3832	1.17895	1.65608	1.62169	1.93103	2.61333	2.18717	1.65782	1.21277	1.32447	1.06739	0.962567	1.14058	2.16887
	6	2.24346	2.26509	1.95052	1.30208	1.24672	1.47769	1.58268	1.68848	1.77895	1.88624	1.78307	1.28836	0.87766	1.49333	1.16267	1.21867	1.98138
	7	2.42368	2.26772	1.50649	1.51429	1.49091	1.7013	1.37984	1.90933	1.69974	1.50262	0.744125	1.4252	1.59151	1.41223	1.44828	1.49734	2.16533
	8	1.44619	1.59686	1.52727	0.96124	1.16279	1.15762	1.10513	1.20823	1.01034	1.32383	0.887728	1.62042	1.59474	1.42895	1.30504	1.6164	2.16667
	9	1.30287	1.23298	1.12953	0.719072	0.982005	0.958869	0.760925	0.951282	0.562982	0.75	0.591731	0.586563	1.41885	1.48556	1.8971	2.01333	2.11022
	10	0.968504	1.31152	0.621762	0.509044	0.739691	0.8509	0.586118	0.570694	0.575835	0.498715	0.226221	0.293814	0.857513	1.6224	1.72966	2.19261	2.27851
	11	0.559055	0.534031	0.749354	0.548969	0.766067	1.06959	1.11598	0.940874	0.739691	0.66838	0.426735	0.233933	0.728682	1.41299	1.54286	1.71094	1.74869
	12	0.488251	0.752604	0.717617	0.516796	0.726804	1.0799	1.23136	1.03608	0.726804	0.631443	0.621134	0.660668	1.18509	1.44961	1.06701	1.35401	1.37468
	13	0.388021	0.412987	0.398964	0.180412	0.520619	0.703608	1.13178	0.966408	0.863753	0.501285	0.239075	0.269923	0.786632	1.20413	1.13695	1.29049	1.13695
	14		0.680519	0.179487	0.291237	0.696658	0.67268	0.670103	0.840206	0.987113	0.580977	0.218509	0.0822622	0.136598	0.409794	0.714653	0.987113
	15			0.385604	0.437018	0.118252	0.154242	0.362468	0.478149	0.724227	0.683805	0.318766	0.341902	0.215938	0.233933	0.575835
	16				0.161954	0.218509	0.557841	0.74036	0.570694	0.456186	0.516796	0.345361	0.409794	0.384021	0.280206
	17						0.426735	0.413882	0.44473	0.269923	0.164524	0.180879	0.352185	0.485861

## Sheet: CV
MeanVelocity
Signals of insufficient quality were excluded from the property maps. Signals could be rejected based on noise low amplitude, large artefact or ventricluar farfields that could not be substracted.
		1	2	3	4	5	6	7	8	9	10	11	12	13	14	15	16	17
1	1					0.789175	0.727008	0.68589	0.629424	0.609134	0.711671	0.762898	0.724093	0.723721					1																		1
	2					0.853927	0.799036	0.790145	0.7231	0.732227	0.731479	0.751476	0.742507	0.718209	0.716689
	3			0.845272	0.883137	0.946076	0.922792	0.881208	0.792801	0.755717	0.751192	0.759809	0.757014	0.792481	0.79712	0.8228
	4		0.822273	0.922932	0.948617	0.967271	1.06698	0.984078	0.877841	0.793458	0.707464	0.694074	0.715768	0.76876	0.804421	0.880535	0.977648
	5	0.674303	0.861003	0.914271	0.958085	0.991343	1.12446	1.16341	0.954867	0.807569	0.733634	0.704086	0.685938	0.741777	0.776053	0.864012	0.886892	0.938758
	6	0.845395	0.997585	0.97672	1.04224	1.05318	1.02507	1.05459	0.932557	0.744528	0.720992	0.652801	0.657891	0.711413	0.772329	0.808681	0.860206	0.787079
	7	0.915171	1.03887	1.01392	1.16397	1.10862	1.11427	1.11065	0.977118	0.743692	0.670872	0.626824	0.649358	0.732377	0.743381	0.762398	0.784962	0.779004
	8	0.848342	0.961457	1.07311	1.42138	1.46094	1.34116	1.276	1.09583	0.82583	0.717154	0.65032	0.675509	0.728487	0.754482	0.752744	0.807032	0.722192
	9	0.77323	0.875421	1.1227	1.94972	2.09964	1.73827	1.60527	1.42105	1.09908	0.868875	0.756661	0.710558	0.735233	0.791107	0.763373	0.703988	0.691903
	10	0.731511	0.790849	0.957658	1.38691	1.98863	1.99045	1.84281	1.88311	1.46396	1.02451	0.84373	0.709301	0.722044	0.735605	0.761974	0.760417	0.711975
	11	0.682153	0.694389	0.806972	0.949954	1.03425	1.01843	1.06483	1.10988	1.1165	0.934038	0.784652	0.695182	0.680111	0.693142	0.730045	0.770887	0.738451
	12	0.608059	0.640662	0.691227	0.741116	0.795255	0.775758	0.790811	0.80877	0.775969	0.785222	0.753247	0.685032	0.68358	0.681925	0.712452	0.727326	0.744576
	13	0.651913	0.678067	0.710147	0.729276	0.73815	0.722773	0.746236	0.770377	0.737718	0.717741	0.727913	0.716103	0.690686	0.69451	0.70001	0.749216	0.746321
	14		0.681601	0.777623	0.785106	0.79525	0.823796	0.840937	0.778134	0.730836	0.712431	0.727628	0.715674	0.694727	0.719716	0.712727	0.803428
	15			0.77933	0.814541	0.813951	0.780021	0.763807	0.731461	0.725796	0.710224	0.709962	0.737029	0.716428	0.709863	0.687827
	16				0.868653	0.824144	0.820908	0.793236	0.710409	0.690507	0.686074	0.672217	0.677157	0.688652	0.6708
	17						0.792396	0.787653	0.702885	0.688065	0.69411	0.683207	0.671654	0.674674
2	1					0.795305	0.754101	0.670467	0.6526	0.630047	0.695547	0.696559	0.712826	0.845529					2																		2
	2					0.847903	0.781048	0.745627	0.699313	0.703946	0.705468	0.725463	0.715852	0.735087	0.746086
	3			0.859741	0.951774	0.927765	0.960241	0.863907	0.78399	0.743646	0.730147	0.734812	0.723108	0.745561	0.857715	0.879735
	4		0.815572	0.938195	0.963646	1.00605	1.07062	1.07491	0.933041	0.768152	0.732914	0.70122	0.686318	0.739091	0.807357	0.860377	0.973558
	5	0.754288	0.911697	1.00514	1.04522	1.0169	1.07861	1.11615	0.965904	0.81562	0.743384	0.695731	0.704422	0.740394	0.833519	0.868575	0.945606	0.977165
	6	0.922762	1.034	1.00462	1.07054	1.05797	1.04931	0.979139	0.954016	0.814851	0.733599	0.705606	0.702301	0.745182	0.780528	0.831612	0.880941	0.852208
	7	0.963952	0.983318	1.03333	1.17359	1.10324	1.0532	1.04546	0.917715	0.811544	0.669548	0.626559	0.659989	0.731199	0.779301	0.832047	0.79043	0.77593
	8	0.861331	0.91965	1.10527	1.48296	1.39415	1.2632	1.22826	1.10393	0.818563	0.691652	0.61998	0.643667	0.705313	0.755898	0.772991	0.761353	0.717296
	9	0.890422	0.96485	1.18749	2.02674	2.3245	1.94	1.84896	1.5812	1.07148	0.81959	0.681028	0.647636	0.71023	0.759535	0.740932	0.68519	0.671298
	10	0.778991	0.851972	1.08063	1.68125	2.5057	2.26079	2.20209	2.21883	1.60731	1.03345	0.80046	0.658455	0.64204	0.670908	0.675602	0.707391	0.660937
	11	0.693614	0.756481	0.886662	1.1201	1.21617	1.14837	1.19009	1.20985	1.20458	0.988868	0.79774	0.67706	0.6096	0.621168	0.614964	0.692062	0.686161
	12	0.640079	0.705152	0.80451	0.821739	0.887528	0.839352	0.800977	0.813326	0.820736	0.821093	0.766856	0.687034	0.622417	0.596745	0.612534	0.682344	0.676599
	13	0.637031	0.653142	0.695516	0.742456	0.758102	0.782999	0.763048	0.735393	0.734482	0.738244	0.749664	0.700543	0.649766	0.619936	0.618995	0.66388	0.672899
	14		0.654523	0.706657	0.761169	0.775869	0.769979	0.770586	0.727047	0.718248	0.701605	0.704269	0.706154	0.678096	0.628858	0.630676	0.692497
	15			0.708671	0.747783	0.759253	0.748753	0.749837	0.736573	0.720009	0.714281	0.680668	0.674632	0.647885	0.620682	0.589884
	16				0.765786	0.747679	0.79666	0.754403	0.718564	0.701103	0.70445	0.658515	0.632605	0.616266	0.581082
	17						0.790122	0.779857	0.711036	0.706744	0.717859	0.679959	0.633182	0.595369
3	1					0.759485	0.749166	0.674333	0.614807	0.62707	0.702539	0.782056	0.810092	0.71325					3																		3
	2					0.792685	0.747639	0.740548	0.704665	0.70424	0.75295	0.798695	0.768823	0.753797	0.736709
	3			0.836461	0.924512	0.896103	0.891782	0.835174	0.793209	0.748134	0.764047	0.772843	0.820946	0.793678	0.777872	0.832102
	4		0.874732	0.958894	0.934799	0.972803	0.994684	1.05318	0.994043	0.854856	0.775426	0.746828	0.756407	0.770882	0.861096	0.927777	0.934881
	5	0.784869	0.960562	0.984563	1.01212	0.986837	1.08943	1.18227	1.17278	0.891486	0.756775	0.742606	0.726253	0.774079	0.864855	0.86611	0.923951	0.870482
	6	0.921208	1.04442	1.11262	1.0514	1.04933	1.09392	1.14497	1.1128	0.868486	0.729749	0.699576	0.674919	0.737972	0.845163	0.811126	0.819946	0.762939
	7	1.00614	1.084	1.12952	1.33537	1.22127	1.20678	1.20145	1.09398	0.834192	0.698963	0.604779	0.678922	0.741932	0.835765	0.798762	0.772616	0.725171
	8	0.922063	1.04084	1.24674	1.73527	1.69699	1.44212	1.38912	1.23823	0.922627	0.736928	0.629205	0.638569	0.728383	0.772165	0.7532	0.789406	0.706401
	9	0.889421	1.05861	1.35734	2.54392	2.85517	2.13287	1.92962	1.68584	1.22718	0.896463	0.740462	0.688397	0.695022	0.72807	0.696765	0.746786	0.693833
	10	0.795689	0.909692	1.1257	1.78319	2.5826	2.44809	2.41058	2.54404	1.90866	1.14203	0.846129	0.742709	0.680718	0.676826	0.674556	0.734945	0.680893
	11	0.71609	0.773192	0.864786	1.12694	1.23435	1.23203	1.29541	1.32765	1.31658	1.08015	0.869937	0.710591	0.652595	0.672567	0.653798	0.680898	0.715026
	12	0.62204	0.675361	0.740702	0.820424	0.87213	0.856616	0.873912	0.869572	0.907366	0.913362	0.830258	0.697708	0.653885	0.653906	0.685447	0.7114	0.71251
	13	0.624608	0.65165	0.701441	0.740411	0.756117	0.787379	0.811954	0.802511	0.807116	0.801548	0.794244	0.719699	0.706921	0.680155	0.662537	0.690481	0.703673
	14		0.657759	0.696734	0.750742	0.785825	0.79471	0.83437	0.805301	0.798058	0.744925	0.740225	0.732575	0.70757	0.684264	0.674933	0.705878
	15			0.724633	0.753821	0.772222	0.808782	0.793271	0.77634	0.771714	0.752843	0.724183	0.709927	0.708845	0.665348	0.641748
	16				0.756117	0.76932	0.791416	0.773191	0.714833	0.718931	0.715469	0.686773	0.669928	0.654255	0.631673
	17						0.758887	0.767404	0.702962	0.705577	0.73364	0.706376	0.673293	0.649415
4	1					0.738777	0.74836	0.68499	0.661305	0.668528	0.751698	0.725764	0.719201	0.711206					4																		4
	2					0.792634	0.783889	0.728607	0.720696	0.707	0.756749	0.751172	0.749818	0.740221	0.77499
	3			0.842573	0.898492	0.864723	0.865182	0.824252	0.786446	0.755016	0.753746	0.749633	0.759913	0.746877	0.792795	0.792013
	4		0.790115	0.884986	0.911938	0.952895	0.960598	0.914141	0.948701	0.794689	0.717642	0.727882	0.734717	0.776376	0.840981	0.847183	0.890502
	5	0.700671	0.847582	0.931161	0.987187	1.0014	1.04557	1.04008	1.08096	0.84181	0.723447	0.703353	0.717723	0.751012	0.810594	0.875029	0.914669	0.877061
	6	0.818163	0.959777	0.99772	0.979909	1.06328	1.03494	1.05028	1.0859	0.834644	0.709506	0.683665	0.695486	0.75823	0.815182	0.840577	0.831988	0.79133
	7	0.878578	1.00484	1.01213	1.2013	1.12994	1.09374	1.14108	1.07764	0.833558	0.663236	0.621117	0.661192	0.757602	0.831196	0.822875	0.806986	0.73835
	8	0.820997	0.941559	1.07282	1.47706	1.47612	1.38886	1.33138	1.19077	0.905611	0.734171	0.645876	0.623466	0.749958	0.74122	0.751989	0.802218	0.750841
	9	0.823843	0.933258	1.15976	2.06427	2.33113	1.9004	1.75427	1.56394	1.15506	0.874253	0.72476	0.656252	0.712776	0.69024	0.645535	0.754785	0.69119
	10	0.756666	0.823335	0.974027	1.40798	2.10483	1.98983	1.97807	2.13374	1.54161	1.00056	0.771957	0.652797	0.65641	0.643727	0.635507	0.686606	0.671695
	11	0.673394	0.683753	0.755988	0.907048	0.996052	1.00384	1.03884	1.11203	1.08828	0.944557	0.792355	0.644155	0.618273	0.618764	0.599709	0.693287	0.656532
	12	0.601998	0.639422	0.679317	0.716369	0.757322	0.739733	0.759903	0.766568	0.766512	0.797216	0.773127	0.681032	0.638535	0.640991	0.608171	0.647331	0.654297
	13	0.650174	0.657204	0.640254	0.682884	0.711071	0.745324	0.736071	0.727649	0.703616	0.709609	0.735337	0.706451	0.673488	0.678388	0.63805	0.671938	0.622011
	14		0.645703	0.70051	0.728748	0.790958	0.793091	0.805502	0.736386	0.740675	0.686945	0.710538	0.725233	0.710753	0.678762	0.663467	0.693629
	15			0.774377	0.761979	0.796383	0.781586	0.800754	0.739893	0.728396	0.695793	0.677736	0.687348	0.682988	0.672587	0.615834
	16				0.800985	0.81463	0.82825	0.772525	0.69641	0.683349	0.677345	0.65587	0.653879	0.643521	0.639885
	17						0.809288	0.757637	0.688075	0.679273	0.683752	0.670016	0.646291	0.647596
5	1					0.73264	0.674521	0.640289	0.621612	0.641606	0.680729	0.709433	0.665506	0.708933					5																		5
	2					0.779005	0.747641	0.712325	0.703004	0.71362	0.72798	0.695131	0.677523	0.662426	0.677671
	3			0.904769	0.887641	0.877675	0.912314	0.821192	0.812493	0.765185	0.759157	0.731141	0.670649	0.725107	0.737159	0.810366
	4		0.931889	0.914871	0.911322	0.955122	0.982529	0.991098	1.00885	0.872139	0.752624	0.728837	0.708409	0.707107	0.717667	0.837163	0.894682
	5	0.80949	0.972911	0.983693	1.02898	0.993527	1.15826	1.1676	1.03567	0.90468	0.753153	0.688938	0.694899	0.693509	0.722791	0.794618	0.798588	0.82569
	6	0.959292	1.03987	1.04121	1.05481	1.04215	1.06288	1.12585	1.06375	0.845811	0.751522	0.715196	0.702873	0.725534	0.737554	0.78192	0.745721	0.796603
	7	0.991084	1.03789	1.10052	1.2668	1.22	1.14509	1.20864	1.10887	0.86679	0.717369	0.638015	0.637629	0.745085	0.786979	0.800818	0.757894	0.712746
	8	0.878424	1.01026	1.21799	1.7184	1.58795	1.52775	1.52729	1.29555	0.962238	0.737522	0.637936	0.70263	0.801828	0.796409	0.750978	0.742077	0.707498
	9	0.848428	0.983861	1.26598	2.33132	2.58157	2.07406	2.01154	1.77086	1.31771	0.915732	0.731846	0.696163	0.742117	0.735037	0.728432	0.672001	0.635202
	10	0.778584	0.869007	1.09343	1.69167	2.55755	2.4394	2.33325	2.38512	1.80451	1.10183	0.85479	0.701754	0.664398	0.688301	0.640648	0.725053	0.638857
	11	0.715659	0.766311	0.846326	1.07501	1.16215	1.17036	1.23854	1.25469	1.27367	1.04304	0.8563	0.694877	0.64503	0.610843	0.626892	0.706731	0.743906
	12	0.633084	0.679421	0.721215	0.782283	0.82349	0.803245	0.79953	0.810579	0.82547	0.843651	0.795801	0.687819	0.64762	0.621347	0.643534	0.673677	0.690751
	13	0.649846	0.668158	0.659204	0.690923	0.702612	0.731144	0.713692	0.729389	0.736505	0.73908	0.759905	0.698535	0.677012	0.647498	0.648196	0.684845	0.711438
	14		0.616416	0.644458	0.716162	0.724142	0.757941	0.749154	0.729903	0.72282	0.712675	0.728331	0.712266	0.670228	0.646428	0.648141	0.706325
	15			0.665276	0.697265	0.721544	0.743102	0.739133	0.731797	0.73461	0.718568	0.693177	0.672524	0.65288	0.65083	0.604996
	16				0.711221	0.706611	0.742731	0.74436	0.712038	0.711378	0.708656	0.66423	0.638854	0.620951	0.578038
	17						0.717082	0.751519	0.704576	0.701413	0.722239	0.689756	0.640204	0.607587
6	1					0.813658	0.753112	0.708895	0.678773	0.678452	0.695772	0.748456	0.737932	0.721588					6																		6
	2					0.869544	0.838793	0.764753	0.761747	0.72882	0.710888	0.764057	0.778192	0.775397	0.747542
	3			0.983637	1.01894	0.995939	1.00888	0.952769	0.811739	0.76677	0.707655	0.717827	0.765565	0.76276	0.84322	0.852407
	4		0.927673	1.02202	0.994774	1.08803	1.16377	1.10829	0.986495	0.802333	0.699818	0.702968	0.716136	0.731491	0.767474	0.803545	0.899016
	5	0.883973	1.01047	1.05014	1.04306	1.09512	1.23181	1.23717	1.11209	0.885197	0.725061	0.70233	0.719728	0.735647	0.754545	0.889273	0.874662	0.967759
	6	0.976	1.11591	1.10639	1.1309	1.10291	1.11619	1.15359	1.08131	0.859079	0.710548	0.68032	0.69232	0.718525	0.767996	0.811569	0.805904	0.861981
	7	0.988894	1.05231	1.165	1.33915	1.20403	1.19992	1.29634	1.10707	0.837986	0.668769	0.648286	0.644858	0.738042	0.81046	0.850668	0.841831	0.7622
	8	0.934312	1.0513	1.30805	1.82389	1.75268	1.54301	1.55612	1.30431	0.924754	0.742322	0.655868	0.667715	0.718245	0.746998	0.738062	0.801454	0.78013
	9	0.914262	0.997483	1.31199	2.39582	2.79361	2.22156	2.01576	1.79553	1.24034	0.901104	0.736967	0.664588	0.684796	0.704253	0.675779	0.706591	0.645407
	10	0.830101	0.910908	1.1417	1.67611	2.56514	2.48137	2.45237	2.54746	1.85455	1.11755	0.834671	0.689763	0.663588	0.657823	0.648418	0.730469	0.627959
	11	0.712906	0.752055	0.872866	1.10731	1.18891	1.13332	1.21182	1.29984	1.2838	1.03464	0.836539	0.664973	0.640556	0.624736	0.636328	0.717301	0.686316
	12	0.621195	0.668457	0.734095	0.81066	0.830662	0.798458	0.787237	0.810788	0.83581	0.850076	0.798867	0.662627	0.614448	0.615514	0.614755	0.6843	0.699537
	13	0.622467	0.642783	0.667927	0.71681	0.713456	0.720338	0.733449	0.739691	0.739879	0.753976	0.771849	0.698736	0.649939	0.624888	0.620654	0.709332	0.664929
	14		0.639681	0.69334	0.742079	0.77968	0.786024	0.744916	0.734639	0.72541	0.714458	0.711425	0.688262	0.668689	0.642146	0.661582	0.738043
	15			0.760116	0.756394	0.796011	0.799747	0.757069	0.713571	0.726607	0.708593	0.684297	0.664886	0.650691	0.623294	0.614018
	16				0.788473	0.780785	0.783013	0.777057	0.696154	0.69798	0.692786	0.661983	0.63232	0.62344	0.587933
	17						0.776308	0.788312	0.703366	0.700537	0.713473	0.69877	0.641496	0.624562
7	1					0.746017	0.745199	0.682449	0.66366	0.651322	0.67184	0.734383	0.70276	0.765819					7																		7
	2					0.764136	0.760557	0.752382	0.705319	0.730871	0.742109	0.735538	0.770232	0.744983	0.765184
	3			0.892322	0.937173	0.888183	0.866094	0.889187	0.804102	0.763383	0.714766	0.744217	0.773504	0.75141	0.801304	0.815838
	4		0.862373	0.904575	0.920266	0.975662	1.01492	1.01842	0.952218	0.821524	0.738863	0.703468	0.714823	0.731667	0.830468	0.830834	0.884546
	5	0.742036	0.939422	0.964435	0.962766	1.00922	1.09576	1.08477	1.06071	0.876799	0.726475	0.696458	0.67946	0.714824	0.7799	0.831466	0.860067	0.886724
	6	0.886355	1.01965	0.993206	1.04545	1.02295	1.09945	1.13134	1.04962	0.880836	0.74652	0.685152	0.66537	0.722172	0.793725	0.818244	0.810672	0.855136
	7	0.98351	1.07275	1.05749	1.19241	1.19923	1.17577	1.23566	1.14836	0.893852	0.694535	0.616736	0.640599	0.740112	0.826814	0.838051	0.794448	0.740612
	8	0.894138	1.00284	1.13461	1.58943	1.57417	1.40761	1.46444	1.28011	0.936211	0.733052	0.647957	0.644603	0.683052	0.746637	0.759914	0.777983	0.725275
	9	0.875508	0.992571	1.19488	2.17549	2.50682	2.02699	2.00904	1.74775	1.29217	0.892759	0.708376	0.678116	0.690886	0.679168	0.733474	0.730103	0.679324
	10	0.778738	0.865765	1.02831	1.56177	2.35041	2.22934	2.26219	2.37844	1.80019	1.0835	0.809855	0.656725	0.638602	0.621118	0.669109	0.712336	0.681215
	11	0.709984	0.749791	0.848276	1.03565	1.13397	1.10398	1.16113	1.20005	1.19218	0.999521	0.808787	0.658764	0.604307	0.595711	0.618034	0.68389	0.681866
	12	0.660107	0.692037	0.726191	0.776104	0.80278	0.789537	0.778828	0.793828	0.82479	0.831366	0.790093	0.6651	0.600293	0.594593	0.612719	0.669871	0.697548
	13	0.683219	0.676647	0.670429	0.694258	0.732333	0.749277	0.72654	0.720767	0.719408	0.740686	0.775251	0.702026	0.6449	0.632321	0.627316	0.685992	0.652018
	14		0.689529	0.73337	0.738989	0.7725	0.797608	0.793533	0.712681	0.724903	0.699749	0.715827	0.69241	0.666565	0.660716	0.626776	0.682661
	15			0.766229	0.758337	0.774646	0.758414	0.758709	0.72903	0.724399	0.702805	0.679293	0.685234	0.660892	0.638192	0.572093
	16				0.768064	0.77449	0.780431	0.762652	0.709698	0.701172	0.685674	0.666944	0.621715	0.610963	0.569472
	17						0.767219	0.759199	0.703721	0.71616	0.722013	0.691084	0.626878	0.596089
8	1					0.866898	0.731124	0.680071	0.644153	0.650839	0.717013	0.742767	0.765178	0.780182					8																		8
	2					0.828232	0.795458	0.739929	0.738042	0.733931	0.759412	0.786626	0.781367	0.773431	0.751759
	3			0.920816	0.913631	0.921762	0.937503	0.856091	0.799244	0.777318	0.793009	0.79852	0.784978	0.803464	0.816561	0.853676
	4		0.905699	0.902597	0.953696	1.00329	1.11173	1.07668	1.01127	0.815418	0.770222	0.735153	0.733271	0.753371	0.811876	0.838418	0.870731
	5	0.812741	0.995385	1.00449	0.996334	1.02001	1.21944	1.16694	1.05504	0.804804	0.727363	0.723228	0.741479	0.758467	0.792465	0.782733	0.835959	0.861484
	6	0.910108	1.0746	1.12756	1.12279	1.0875	1.08787	1.09548	1.02288	0.764798	0.739728	0.714575	0.690926	0.754622	0.809052	0.770514	0.826895	0.834251
	7	0.953696	1.03522	1.06183	1.27268	1.22251	1.19686	1.19222	1.0564	0.850831	0.676969	0.682557	0.690679	0.722246	0.771856	0.783668	0.808119	0.775147
	8	0.92129	1.00615	1.18792	1.58451	1.62103	1.43386	1.31847	1.19638	0.936371	0.760116	0.673283	0.656723	0.718408	0.740902	0.750767	0.74264	0.696541
	9	0.871912	1.06452	1.25852	2.15272	2.36161	1.9984	1.83654	1.69119	1.26098	0.931078	0.759551	0.689063	0.701064	0.693015	0.689092	0.675647	0.668341
	10	0.799798	0.87775	1.07654	1.57457	2.14466	2.08547	2.02916	2.13152	1.67842	1.08144	0.845932	0.710542	0.680868	0.677766	0.694156	0.740363	0.689342
	11	0.692176	0.753652	0.848955	1.05438	1.10687	1.07097	1.16035	1.17773	1.23882	0.977001	0.814291	0.695758	0.661003	0.67186	0.653789	0.730358	0.738207
	12	0.634084	0.676048	0.724556	0.797921	0.800103	0.766108	0.744951	0.764398	0.788913	0.805617	0.772637	0.690642	0.679265	0.681364	0.683462	0.735051	0.745415
	13	0.661739	0.656754	0.674576	0.721523	0.725415	0.710178	0.710001	0.711729	0.706573	0.706675	0.731257	0.698758	0.687679	0.663997	0.674256	0.705526	0.712863
	14		0.687078	0.729689	0.738297	0.736968	0.744203	0.740171	0.733062	0.70546	0.697881	0.710024	0.697755	0.677829	0.679609	0.675072	0.747488
	15			0.793845	0.760442	0.757492	0.763744	0.746041	0.716971	0.719549	0.702737	0.681913	0.684317	0.662985	0.640493	0.613196
	16				0.803653	0.770178	0.789348	0.770983	0.708	0.696247	0.68818	0.659408	0.639548	0.623665	0.596921
	17						0.761628	0.782763	0.704047	0.704149	0.714951	0.691523	0.647301	0.622151
9	1					0.785801	0.724005	0.671647	0.659526	0.678793	0.713607	0.738402	0.757206	0.742206					9																		9
	2					0.844767	0.813095	0.754186	0.728392	0.735831	0.714119	0.762358	0.753344	0.753178	0.744355
	3			0.911814	0.91278	0.968539	0.89768	0.836676	0.786053	0.743411	0.718307	0.77817	0.77306	0.800679	0.808929	0.881492
	4		0.972635	1.02679	1.02182	1.05909	1.04053	1.0144	0.986851	0.81163	0.750321	0.719727	0.709403	0.760224	0.773528	0.895025	0.908285
	5	0.870053	1.07816	1.07663	1.04128	1.05802	1.14942	1.16756	1.08763	0.886514	0.737739	0.668353	0.716788	0.716576	0.784601	0.882357	0.882998	0.908163
	6	0.918899	1.06628	1.14675	1.1048	1.08084	1.13636	1.07797	1.07614	0.819496	0.66165	0.634124	0.658677	0.718773	0.790248	0.819341	0.827627	0.833471
	7	1.02131	1.07269	1.1774	1.30413	1.27486	1.21742	1.17095	1.14673	0.841349	0.651989	0.606682	0.637011	0.721417	0.773709	0.813647	0.826098	0.799399
	8	0.915183	1.01232	1.19951	1.76421	1.65609	1.44053	1.37602	1.19785	0.903087	0.725191	0.633906	0.602892	0.710882	0.778378	0.773924	0.801774	0.788583
	9	0.918093	1.03732	1.21388	2.1563	2.45194	1.93542	1.80981	1.53472	1.119	0.90423	0.725116	0.632871	0.692529	0.697547	0.68711	0.696942	0.678229
	10	0.803527	0.8737	1.07215	1.51261	2.14805	1.91687	1.8857	2.01013	1.52659	1.00832	0.800569	0.655294	0.628957	0.66109	0.656325	0.71469	0.663078
	11	0.719835	0.793347	0.868766	1.02874	1.07825	1.05226	1.08551	1.13364	1.11213	0.936131	0.783244	0.646054	0.613449	0.591004	0.598259	0.644872	0.631834
	12	0.639879	0.686352	0.738155	0.784501	0.809637	0.791183	0.778882	0.79638	0.804638	0.778143	0.747874	0.648711	0.613766	0.610846	0.608905	0.657091	0.678952
	13	0.655776	0.681404	0.703328	0.707677	0.740478	0.757483	0.738099	0.74926	0.733435	0.731308	0.732639	0.679487	0.63835	0.660154	0.630581	0.666695	0.697687
	14		0.707437	0.763916	0.797854	0.838984	0.84206	0.780589	0.738829	0.71444	0.695793	0.706313	0.699783	0.659067	0.65351	0.661127	0.739645
	15			0.793063	0.800652	0.805839	0.79592	0.778474	0.723408	0.718054	0.701958	0.688642	0.679846	0.652809	0.641358	0.651735
	16				0.835972	0.790423	0.796612	0.80596	0.74824	0.699906	0.688148	0.674991	0.656843	0.634718	0.609324
	17						0.777928	0.813084	0.723939	0.706406	0.709507	0.703935	0.659056	0.631322
10	1					0.744556	0.713205	0.709341	0.697985	0.689198	0.693397	0.711644	0.710637	0.659958					10																		10
	2					0.825322	0.773691	0.769171	0.784285	0.736777	0.748904	0.713809	0.766267	0.71528	0.705078
	3			0.831663	0.868574	0.980877	0.922632	0.872087	0.831156	0.760366	0.751457	0.727389	0.770475	0.748776	0.766319	0.800722
	4		0.933759	0.890676	0.898545	0.940908	0.98116	0.941035	0.930692	0.800544	0.793253	0.74394	0.710459	0.716344	0.793141	0.84994	0.823951
	5	0.783423	0.975347	0.950723	0.944526	0.971632	1.03764	1.03441	1.0571	0.833604	0.811278	0.705997	0.704733	0.717603	0.793316	0.830813	0.839113	0.853437
	6	0.899328	1.03259	1.00901	0.970115	0.96159	1.03743	0.997062	0.92779	0.768436	0.729906	0.687033	0.681484	0.693476	0.779185	0.790001	0.849181	0.81854
	7	0.943762	1.02342	1.0272	1.11707	1.06123	1.01209	1.00491	0.931644	0.788848	0.685635	0.612545	0.620902	0.693623	0.755593	0.780707	0.791258	0.743627
	8	0.926896	1.02393	1.16798	1.57381	1.45265	1.26115	1.14	1.02502	0.787807	0.699804	0.619077	0.641621	0.65705	0.709053	0.721693	0.741964	0.679826
	9	0.84264	0.945338	1.17246	1.97545	2.22111	1.70886	1.5577	1.36012	1.03176	0.811295	0.700049	0.674411	0.657643	0.697445	0.662807	0.69584	0.661711
	10	0.762272	0.849584	0.983022	1.45666	1.93704	1.88594	1.84377	1.93147	1.4625	0.976091	0.789532	0.647749	0.63317	0.649668	0.652314	0.730439	0.661403
	11	0.678957	0.72813	0.850321	1.01375	1.0681	1.02407	1.03007	1.07289	1.06637	0.903741	0.788553	0.651777	0.610325	0.610624	0.646358	0.667741	0.645846
	12	0.632088	0.674119	0.729171	0.776448	0.800094	0.797131	0.750468	0.762298	0.761164	0.760594	0.74108	0.669556	0.645092	0.616686	0.620079	0.649989	0.652183
	13	0.646724	0.667701	0.696328	0.709733	0.714326	0.728932	0.714339	0.714681	0.710366	0.697872	0.718202	0.673299	0.648663	0.636208	0.627201	0.664225	0.644109
	14		0.690686	0.735887	0.776224	0.784575	0.793805	0.754669	0.748139	0.725199	0.694263	0.685687	0.67578	0.645744	0.624161	0.610803	0.656127
	15			0.849243	0.810081	0.819613	0.768301	0.743649	0.7328	0.731341	0.709164	0.687905	0.67644	0.665753	0.623546	0.592769
	16				0.795417	0.783198	0.771063	0.778155	0.712329	0.707908	0.693684	0.658575	0.656004	0.64614	0.62104
	17						0.755429	0.761271	0.705538	0.694992	0.706395	0.679545	0.662779	0.653964

## Sheet: Pref
Preferentiality
Signals of insufficient quality were excluded from the property maps. Signals could be rejected based on noise low amplitude, large artefact or ventricluar farfields that could not be substracted.
		1	2	3	4	5	6	7	8	9	10	11	12	13	14	15	16	17
1	1					1.43397	1.53838	1.65941	1.84617	2.13301	2.42448	2.73622	2.89741	2.91792					1																		1
	2					1.46835	1.54511	1.72182	2.02949	2.41435	2.62311	2.81187	2.93898	2.8411	2.68046
	3			1.07314	1.38291	1.56329	1.69719	1.80727	2.11401	2.459	2.73244	2.87359	2.97913	2.90431	2.75116	2.57719
	4		0.815054	1.13514	1.56413	1.63454	1.78561	1.92805	2.23699	2.60951	2.78535	2.80998	2.84419	2.74817	2.62386	2.46729	2.43443
	5	0.6362	0.870145	1.19001	1.57012	1.65662	1.80566	1.98312	2.26574	2.5516	2.76925	2.64475	2.54311	2.53915	2.48747	2.41775	2.43326	2.69723
	6	0.526879	0.824779	1.08397	1.45677	1.64486	1.79688	1.9154	2.14845	2.41421	2.53746	2.42726	2.36489	2.25669	2.33476	2.39829	2.40054	2.77591
	7	0.28493	0.586052	0.848042	1.33177	1.60013	1.81662	1.9039	2.00991	2.22829	2.43026	2.39215	2.33147	2.29403	2.36251	2.45595	2.62747	2.84442
	8	0.0913676	0.273493	0.540597	1.16043	1.65806	1.89997	1.95661	2.01104	2.25681	2.373	2.44149	2.39529	2.36562	2.45468	2.64875	2.79464	2.87762
	9	2.9642	3.04979	3.11336	0.41702	1.51935	2.1516	2.1748	2.19777	2.43627	2.55562	2.60331	2.60855	2.60726	2.69084	2.74645	2.73832	2.66747
	10	2.74961	2.72911	2.69433	2.3927	1.61885	1.05433	1.02476	1.21274	2.95208	2.92839	2.93127	2.9455	2.93494	2.9653	2.89116	2.83015	2.6327
	11	2.51743	2.4423	2.35348	2.03851	1.66989	1.49383	1.50006	1.51463	1.21786	0.653079	0.348936	0.16395	0.0611836	0.0237003	3.04231	2.90889	2.76493
	12	2.23046	2.20595	2.08984	1.89268	1.65879	1.53917	1.57144	1.62338	1.49246	1.16616	0.772047	0.467943	0.331439	0.168791	0.0164651	3.08422	2.93242
	13	2.20045	2.0775	1.98295	1.8629	1.71722	1.64974	1.66327	1.67511	1.58851	1.38236	1.03681	0.589799	0.44578	0.305911	0.138268	3.11379	3.03812
	14		2.06116	1.98394	1.94872	1.89087	1.82973	1.75431	1.77698	1.77884	1.56063	1.24231	0.730194	0.546752	0.459852	0.314506	0.14549
	15			2.01523	2.04863	1.93582	1.8368	1.75481	1.81395	1.88546	1.68917	1.26196	0.873917	0.695778	0.624529	0.521621
	16				2.11767	1.97107	1.80931	1.69167	1.78604	1.90295	1.76296	1.39879	1.02822	0.866737	0.777132
	17						1.8129	1.57089	1.70742	1.87693	1.75774	1.34292	1.04326	0.889907
2	1					1.44513	1.58823	1.78207	2.00924	2.2473	2.43042	2.61401	2.78974	2.67634					2																		2
	2					1.51302	1.57097	1.77636	2.14092	2.48493	2.58248	2.7196	2.8291	2.76681	2.57772
	3			1.11389	1.50471	1.65614	1.70118	1.82898	2.25134	2.56806	2.69059	2.80812	2.84862	2.83226	2.75569	2.49329
	4		0.85615	1.23813	1.60798	1.75618	1.83106	2.02358	2.43079	2.69483	2.81812	2.85662	2.80603	2.74275	2.63974	2.49431	2.40097
	5	0.624805	0.987136	1.26426	1.59056	1.74326	1.87985	2.04089	2.40543	2.72147	2.80446	2.74265	2.60931	2.60429	2.55721	2.41831	2.38824	2.58774
	6	0.604776	0.930351	1.15267	1.45599	1.6264	1.80595	1.94548	2.2019	2.49093	2.64385	2.49819	2.43353	2.42938	2.39231	2.51327	2.56115	2.86462
	7	0.469643	0.735289	0.937826	1.34749	1.6153	1.78648	1.89422	1.99432	2.23317	2.38575	2.44098	2.42689	2.46104	2.4593	2.61442	2.69603	2.94858
	8	0.245864	0.418551	0.672196	1.21182	1.6412	1.88917	1.9307	2.00724	2.25331	2.40786	2.45608	2.46484	2.49417	2.61933	2.74075	2.91549	2.99772
	9	3.12101	0.033328	0.131866	0.607444	1.614	2.11362	2.12276	2.18008	2.4605	2.57352	2.65299	2.67756	2.71554	2.76391	2.87122	2.94194	2.95292
	10	2.89709	2.83903	2.7761	2.42602	1.38801	0.977168	0.912685	0.884002	0.0420687	3.03609	3.00712	3.01483	3.01948	3.0292	3.04599	3.04319	2.9518
	11	2.62666	2.49086	2.35426	1.99614	1.56325	1.37414	1.36779	1.39087	1.06284	0.653928	0.37963	0.238985	0.118026	0.0426912	3.11006	3.11726	2.96876
	12	2.40032	2.28352	2.10517	1.87284	1.57628	1.45885	1.47671	1.48575	1.35755	1.09059	0.75182	0.462607	0.283973	0.16326	0.0532647	3.11803	3.03942
	13	2.33772	2.14672	1.99432	1.81145	1.6265	1.55211	1.53907	1.55238	1.4538	1.28852	1.017	0.621105	0.398958	0.253826	0.113177	0.0172548	3.12711
	14		2.06938	1.96671	1.84916	1.68839	1.59185	1.51304	1.52965	1.5083	1.38692	1.16498	0.805398	0.573191	0.439187	0.300559	0.141331
	15			1.94236	1.89329	1.73511	1.60826	1.50922	1.55314	1.57075	1.43321	1.21138	0.955601	0.776415	0.670111	0.535511
	16				1.90048	1.74746	1.62276	1.50786	1.54823	1.59708	1.47693	1.26085	1.07262	0.927737	0.840182
	17						1.68912	1.49225	1.54218	1.60784	1.46607	1.23983	1.09919	1.00458
3	1					1.43814	1.55529	1.71428	1.94117	2.14782	2.30863	2.54392	2.74519	2.73293					3																		3
	2					1.49409	1.55906	1.71456	2.01869	2.24756	2.44941	2.62739	2.769	2.81603	2.62902
	3			1.18389	1.47754	1.59827	1.71211	1.77077	2.10025	2.3523	2.53116	2.68287	2.8431	2.88501	2.75647	2.49433
	4		0.907928	1.1891	1.59025	1.70282	1.82913	1.88008	2.15788	2.57999	2.72952	2.76613	2.80558	2.81477	2.72039	2.58773	2.66513
	5	0.710253	0.965324	1.24944	1.58336	1.7205	1.86276	1.98763	2.2591	2.59814	2.74764	2.68649	2.64103	2.58841	2.5925	2.5838	2.61157	2.77405
	6	0.607951	0.898913	1.12046	1.51441	1.70529	1.84379	1.93798	2.07359	2.33995	2.51785	2.4598	2.39632	2.34176	2.37056	2.6157	2.5973	2.93772
	7	0.438729	0.714604	0.917302	1.36721	1.68625	1.93189	1.99583	2.00697	2.1719	2.34262	2.43295	2.41101	2.36878	2.45979	2.71619	2.83472	3.0427
	8	0.230779	0.386829	0.598577	1.16251	1.77448	2.04929	2.04933	2.03343	2.18979	2.33865	2.46548	2.47375	2.50316	2.5883	2.7257	2.93705	3.03598
	9	3.09359	3.13763	0.0741557	0.453132	1.70804	2.31828	2.28295	2.25624	2.41607	2.5676	2.66844	2.7093	2.73128	2.76647	2.85535	2.92156	2.9681
	10	2.8353	2.7867	2.71938	2.41744	1.40433	0.862211	0.734345	0.812148	0.109075	3.07453	3.0161	3.01303	2.99233	3.01512	2.99468	3.03483	2.93708
	11	2.5905	2.50174	2.37959	2.03784	1.57375	1.35295	1.33848	1.3674	1.0711	0.64964	0.372805	0.205517	0.0937181	0.00984329	3.0734	3.00885	2.94779
	12	2.36101	2.28956	2.16135	1.90761	1.56774	1.41962	1.44276	1.48886	1.38461	1.1073	0.732905	0.442095	0.255581	0.118928	0.0126837	3.08095	3.00862
	13	2.30929	2.16454	2.03694	1.86762	1.63667	1.53285	1.51102	1.51935	1.47331	1.30236	0.999731	0.599759	0.383531	0.241178	0.102288	3.1312	3.10841
	14		2.12196	2.01292	1.89752	1.72571	1.62648	1.54534	1.53707	1.53859	1.39765	1.16538	0.800977	0.567116	0.443053	0.299562	0.143565
	15			1.99227	1.93503	1.7646	1.64987	1.56632	1.58553	1.59675	1.44947	1.2029	0.964063	0.807685	0.704603	0.560066
	16				1.93994	1.7846	1.66929	1.57056	1.59305	1.61452	1.48234	1.25501	1.0538	0.934355	0.862356
	17						1.71903	1.54427	1.59108	1.62562	1.4617	1.22827	1.08464	1.01086
4	1					1.42646	1.57995	1.72535	1.96936	2.15475	2.35948	2.57451	2.79858	2.85861					4																		4
	2					1.45714	1.57165	1.77661	2.0955	2.3446	2.50583	2.70392	2.86302	2.79747	2.59619
	3			1.1219	1.41687	1.56064	1.7227	1.85914	2.20517	2.46652	2.62217	2.75585	2.84834	2.90291	2.65778	2.3909
	4		0.943483	1.20569	1.51429	1.63099	1.81354	1.95157	2.2257	2.54158	2.72266	2.7621	2.84539	2.75198	2.57296	2.41743	2.48022
	5	0.734923	1.02744	1.24856	1.53269	1.63354	1.84472	2.02585	2.20829	2.50187	2.62811	2.53268	2.47003	2.5481	2.59412	2.47711	2.48735	2.78531
	6	0.569823	0.985398	1.17513	1.4719	1.63244	1.81911	1.97058	2.04642	2.32507	2.45451	2.34451	2.27559	2.31066	2.40135	2.59042	2.63761	2.84662
	7	0.34527	0.676885	0.90821	1.37563	1.61455	1.82701	1.91943	1.95265	2.19771	2.33659	2.37841	2.31757	2.32922	2.40981	2.62231	2.76055	3.01593
	8	0.107711	0.303081	0.551143	1.15119	1.70582	1.94401	1.9945	1.99914	2.22047	2.40081	2.45788	2.46664	2.43338	2.51244	2.68825	2.8282	2.99486
	9	3.0132	3.07427	3.12883	0.366803	1.69455	2.14277	2.15423	2.16682	2.42169	2.6027	2.67074	2.68035	2.6971	2.72345	2.7922	2.80519	2.81642
	10	2.75762	2.7299	2.65659	2.32316	1.56067	1.06716	1.11625	1.20478	0.0880959	3.0552	2.99731	2.99009	2.99396	3.02494	2.99244	2.94386	2.82641
	11	2.4854	2.42662	2.28285	1.97153	1.60595	1.43225	1.44112	1.46802	1.19005	0.700245	0.390968	0.217675	0.11422	0.0639748	3.10874	3.06714	2.90449
	12	2.23946	2.19812	2.08933	1.86906	1.60162	1.50623	1.52924	1.57134	1.47479	1.18266	0.801369	0.466732	0.275901	0.178281	0.0391019	3.07841	3.03724
	13	2.21107	2.08944	1.98487	1.86308	1.71266	1.62446	1.59665	1.61699	1.5593	1.3388	1.04387	0.602521	0.389445	0.286152	0.128657	0.00226861	3.13723
	14		2.05752	1.9751	1.91081	1.80268	1.71446	1.63756	1.6331	1.61687	1.44811	1.19584	0.784212	0.554674	0.454352	0.314157	0.178497
	15			2.01179	1.96386	1.80189	1.67988	1.61901	1.66622	1.70364	1.53247	1.24358	0.940453	0.776604	0.668365	0.540872
	16				2.01007	1.84362	1.70064	1.59273	1.65881	1.7422	1.58589	1.27917	1.05206	0.912428	0.829833
	17						1.7371	1.51295	1.62985	1.74105	1.58391	1.25465	1.05904	0.974494
5	1					1.54187	1.66388	1.78321	1.98039	2.13736	2.34154	2.62674	2.80768	2.85027					5																		5
	2					1.58244	1.6462	1.79005	2.08187	2.35073	2.53293	2.75011	2.90333	2.84904	2.63717
	3			1.3093	1.58446	1.67351	1.73284	1.8152	2.12586	2.47419	2.63606	2.80763	2.91701	2.8895	2.75331	2.4491
	4		0.923135	1.21914	1.60403	1.72404	1.78727	1.93567	2.30902	2.63926	2.82471	2.90784	2.90519	2.82151	2.72339	2.51151	2.53183
	5	0.7012	1.05844	1.24012	1.58357	1.71244	1.78742	1.93342	2.33158	2.58083	2.70044	2.67602	2.62242	2.65112	2.59868	2.47486	2.44764	2.59384
	6	0.590205	0.913197	1.12524	1.47292	1.66727	1.81373	1.91122	2.10653	2.4148	2.55704	2.45478	2.37571	2.384	2.43268	2.55987	2.67496	2.74657
	7	0.381209	0.68288	0.90275	1.3457	1.63554	1.83704	1.89216	1.9764	2.22356	2.40717	2.44939	2.4085	2.35364	2.45037	2.64303	2.76347	3.04062
	8	0.147996	0.333629	0.576817	1.17547	1.72203	1.98374	2.00279	1.97626	2.2132	2.43081	2.51392	2.51416	2.53656	2.58538	2.79041	2.91634	3.08942
	9	3.07417	3.13057	0.0591682	0.57253	1.6226	2.12133	2.1472	2.09627	2.44717	2.66901	2.72652	2.738	2.77604	2.82915	2.92062	2.96927	3.06448
	10	2.82692	2.76552	2.68827	2.341	1.4037	1.04538	1.09177	1.2035	0.199434	3.11792	3.06091	3.0601	3.02591	3.05792	2.99707	3.00483	2.89576
	11	2.55374	2.45258	2.32823	1.98219	1.55684	1.40161	1.41582	1.42623	1.11223	0.680406	0.415763	0.251508	0.126412	0.0723484	3.10536	3.07734	2.99736
	12	2.32904	2.23427	2.1008	1.86356	1.56402	1.45094	1.47384	1.50416	1.41104	1.12753	0.788874	0.489692	0.298903	0.165208	0.0628479	0.00256541	3.06502
	13	2.26396	2.11014	1.97805	1.80677	1.61975	1.54742	1.52594	1.5372	1.48656	1.30887	1.02941	0.640349	0.412512	0.265048	0.154741	0.0679334	3.14078
	14		2.04923	1.9579	1.84403	1.68908	1.60788	1.52719	1.54256	1.51981	1.39983	1.194	0.814184	0.58604	0.459336	0.326932	0.182672
	15			1.9311	1.86994	1.71612	1.59982	1.54292	1.57154	1.60009	1.45921	1.22157	0.980568	0.802231	0.680635	0.570346
	16				1.87352	1.74525	1.64249	1.55281	1.58852	1.62276	1.50078	1.2823	1.07422	0.947078	0.857558
	17						1.71947	1.53861	1.59181	1.62517	1.49087	1.26605	1.11042	1.02798
6	1					1.52811	1.67063	1.83756	2.07696	2.25884	2.43563	2.59821	2.76121	2.73433					6																		6
	2					1.51946	1.62322	1.82157	2.16675	2.45871	2.60516	2.73167	2.8247	2.77416	2.69694
	3			1.07895	1.42056	1.6021	1.7132	1.86492	2.26281	2.51677	2.64393	2.73085	2.84605	2.82539	2.73075	2.49895
	4		0.805941	1.1521	1.59732	1.66291	1.80529	1.88823	2.22792	2.66604	2.79693	2.80765	2.79992	2.74746	2.61617	2.39808	2.33501
	5	0.658346	0.893512	1.17334	1.58268	1.69888	1.84262	1.86803	2.22445	2.6264	2.71341	2.68142	2.55242	2.59227	2.57123	2.48883	2.46411	2.5255
	6	0.544526	0.792989	1.08368	1.48279	1.6967	1.86649	1.89133	2.03219	2.35838	2.54672	2.51309	2.46707	2.45735	2.46456	2.51721	2.49598	2.65485
	7	0.308218	0.592049	0.853941	1.36855	1.6651	1.86386	1.92637	1.95051	2.1996	2.39626	2.47073	2.43896	2.42439	2.48528	2.7252	2.69579	2.92636
	8	0.102256	0.257674	0.483765	1.12691	1.72524	2.00332	2.00017	2.02357	2.24928	2.40845	2.51136	2.52791	2.52828	2.61912	2.79135	2.93267	3.03379
	9	2.99897	3.07277	3.13111	0.316341	1.65469	2.12625	2.13707	2.16063	2.46029	2.5984	2.70278	2.73012	2.77967	2.83428	2.86314	2.92099	2.95744
	10	2.77105	2.74253	2.66902	2.354	1.59757	1.16318	1.06382	1.03948	0.183924	3.08038	3.0303	3.04786	3.04454	3.0648	3.00127	3.00849	2.89515
	11	2.52184	2.46288	2.32635	1.99555	1.61252	1.44472	1.45575	1.45432	1.12264	0.68393	0.368484	0.211879	0.110025	0.0346553	3.06643	3.03546	2.94186
	12	2.30753	2.24614	2.10753	1.87981	1.61597	1.50522	1.53834	1.54437	1.41732	1.13664	0.765835	0.433506	0.249737	0.120192	0.00749531	3.08317	2.98849
	13	2.2352	2.1067	1.98055	1.84309	1.67235	1.59518	1.57192	1.5606	1.51415	1.33159	1.03144	0.60664	0.360449	0.229108	0.112835	3.12404	3.08948
	14		2.04236	1.96344	1.87252	1.71891	1.65225	1.59091	1.60339	1.56938	1.44802	1.21779	0.815205	0.551817	0.426295	0.299867	0.128178
	15			1.96247	1.901	1.7269	1.61521	1.56884	1.62403	1.6672	1.51366	1.2721	1.01121	0.83064	0.715593	0.564154
	16				1.91546	1.75095	1.62572	1.53892	1.61611	1.69491	1.57401	1.33326	1.1121	0.977007	0.886192
	17						1.66454	1.49525	1.59374	1.67993	1.56708	1.30634	1.13782	1.05052
7	1					1.49338	1.61579	1.70587	1.92169	2.21485	2.4343	2.68294	2.89194	2.80612					7																		7
	2					1.54777	1.6015	1.72482	2.0483	2.38779	2.61033	2.75228	2.94942	2.88053	2.66533
	3			1.17457	1.49745	1.59408	1.69498	1.81197	2.17738	2.48857	2.62947	2.82561	2.89977	3.00159	2.79855	2.56149
	4		0.890727	1.17775	1.54396	1.6151	1.72384	1.8836	2.27967	2.56589	2.73911	2.90134	2.81613	2.80429	2.56563	2.5465	2.54601
	5	0.699944	1.00169	1.20941	1.56221	1.62909	1.72582	1.89621	2.23001	2.56873	2.71434	2.65182	2.55344	2.54424	2.58725	2.60257	2.5709	2.62928
	6	0.582793	0.91457	1.09898	1.43103	1.57335	1.73988	1.85837	2.05025	2.43354	2.58456	2.48293	2.36696	2.37659	2.41797	2.6111	2.6888	2.83611
	7	0.40039	0.666604	0.86224	1.28818	1.54833	1.78164	1.88534	1.94172	2.2192	2.40605	2.42504	2.37082	2.39077	2.49663	2.7124	2.78737	2.9585
	8	0.176006	0.333852	0.515933	1.10093	1.63933	1.94458	1.96944	1.98352	2.27241	2.44728	2.53527	2.53708	2.55339	2.69498	2.80786	2.91108	2.97439
	9	3.06941	3.1277	0.0300448	0.281502	1.50906	2.15471	2.12913	2.15581	2.45794	2.66579	2.74221	2.79895	2.85941	2.89693	2.94994	2.99004	3.01894
	10	2.8707	2.83709	2.7367	2.4281	1.61475	1.15751	1.0831	1.08653	0.268694	0.0329105	3.10721	3.11609	3.10822	3.09894	3.05391	3.01751	2.9392
	11	2.6031	2.51873	2.38731	2.02093	1.62215	1.45898	1.44255	1.43768	1.13191	0.721175	0.439893	0.27725	0.148034	0.0631052	3.11407	3.06117	2.94977
	12	2.37056	2.29017	2.13184	1.88757	1.59224	1.49016	1.51261	1.53039	1.41345	1.13007	0.774781	0.463399	0.267438	0.125381	0.0249658	3.1106	3.02168
	13	2.32118	2.15698	2.02983	1.84224	1.64498	1.57762	1.56142	1.58636	1.51196	1.3149	1.00532	0.58322	0.366307	0.243116	0.105985	0.00393138	3.11749
	14		2.13142	2.01042	1.87458	1.69926	1.62504	1.56592	1.59487	1.58145	1.44509	1.20778	0.803398	0.556176	0.443887	0.310495	0.173896
	15			1.97489	1.90665	1.72174	1.62021	1.56057	1.59052	1.6496	1.50176	1.25545	0.98203	0.79961	0.696992	0.563072
	16				1.92688	1.74211	1.62145	1.55031	1.60421	1.67091	1.5453	1.30504	1.08907	0.948478	0.863385
	17						1.66163	1.5076	1.59079	1.6748	1.53607	1.28252	1.10935	1.01707
8	1					1.42607	1.64387	1.75261	2.02178	2.21687	2.37687	2.63715	2.79008	2.91491					8																		8
	2					1.50521	1.641	1.78434	2.11567	2.44021	2.5859	2.77565	2.9211	2.85189	2.6924
	3			1.12477	1.44511	1.57273	1.74991	1.89297	2.26918	2.60241	2.71088	2.85876	2.90925	2.87478	2.73833	2.6025
	4		0.861853	1.1683	1.59076	1.65841	1.81514	2.00345	2.41885	2.78274	2.88734	2.93558	2.8588	2.74958	2.6094	2.59175	2.64902
	5	0.642813	0.884261	1.2107	1.59425	1.73832	1.86229	2.06451	2.34202	2.76959	2.84132	2.75205	2.53067	2.60902	2.58797	2.65054	2.58752	2.87942
	6	0.551806	0.850808	1.03019	1.47113	1.69523	1.84918	1.92012	2.11369	2.42768	2.56766	2.35488	2.29145	2.3385	2.39671	2.66276	2.7902	2.95239
	7	0.341217	0.603178	0.893105	1.37466	1.69814	1.86661	1.9021	1.93927	2.17631	2.38899	2.38285	2.38845	2.36602	2.46251	2.72635	2.82662	3.03429
	8	0.157484	0.290082	0.526504	1.21758	1.79415	1.99101	1.97452	1.91381	2.20901	2.43291	2.49704	2.52159	2.53118	2.67168	2.72834	2.86718	2.9425
	9	3.01238	3.03478	3.11662	0.450611	1.741	2.1377	2.10564	2.00714	2.42755	2.64815	2.71418	2.74178	2.79431	2.85302	2.84955	2.94525	2.90125
	10	2.79258	2.72852	2.65129	2.3175	1.59483	1.20235	1.19378	1.23521	0.322823	0.0207041	3.08484	3.11944	3.10636	3.11124	3.014	3.01049	2.85107
	11	2.51178	2.43801	2.32882	2.02337	1.67186	1.50301	1.49763	1.49811	1.17824	0.733653	0.470057	0.313618	0.206772	0.103773	3.11853	3.03403	2.9186
	12	2.28095	2.23793	2.1201	1.92508	1.65192	1.53916	1.56129	1.58595	1.4634	1.1797	0.817947	0.519298	0.343421	0.191391	0.0391045	3.08786	3.00883
	13	2.23557	2.11488	2.01431	1.87999	1.70657	1.62639	1.59155	1.60431	1.54742	1.3942	1.09323	0.671954	0.429774	0.300716	0.146554	0.0207674	3.10323
	14		2.06558	1.98875	1.9159	1.77116	1.66761	1.61418	1.61578	1.59538	1.47659	1.26657	0.888472	0.612215	0.49347	0.3673	0.210952
	15			1.99844	1.94699	1.78283	1.66376	1.61073	1.66024	1.68195	1.54479	1.29929	1.05048	0.885979	0.787386	0.651134
	16				1.95157	1.79632	1.65779	1.59742	1.65839	1.71125	1.59019	1.34372	1.14057	1.02241	0.949418
	17						1.70604	1.56384	1.63754	1.71756	1.57937	1.31983	1.15707	1.08224
9	1					1.50551	1.57741	1.69506	1.94195	2.24977	2.44949	2.62091	2.75957	2.70388					9																		9
	2					1.54933	1.60985	1.75646	2.11295	2.44105	2.59202	2.72175	2.84363	2.80395	2.66038
	3			1.16485	1.49502	1.66519	1.76628	1.87571	2.13239	2.47098	2.66631	2.78709	2.90249	2.91045	2.74415	2.59859
	4		0.96067	1.20634	1.61341	1.73474	1.83147	1.98577	2.28505	2.60869	2.76697	2.82662	2.81353	2.74866	2.64583	2.60867	2.64086
	5	0.724768	1.01197	1.23009	1.58409	1.73914	1.87941	2.00983	2.28039	2.56034	2.69288	2.6337	2.56201	2.4833	2.56184	2.55559	2.5792	2.67846
	6	0.645748	0.903038	1.09874	1.4607	1.7059	1.85146	1.92903	2.06764	2.34084	2.4882	2.40955	2.32754	2.27784	2.31512	2.57253	2.67897	2.82898
	7	0.410654	0.690499	0.911439	1.33622	1.64443	1.85614	1.92523	2.01884	2.24629	2.32734	2.3959	2.33115	2.26818	2.39115	2.65218	2.80974	2.96808
	8	0.156668	0.356445	0.595306	1.14279	1.67698	1.95257	2.00852	2.0367	2.22607	2.39162	2.45365	2.45811	2.45987	2.52985	2.77994	2.9678	0.0145224
	9	3.02363	3.08994	0.0100757	0.426968	1.52584	2.1559	2.16243	2.17502	2.44457	2.58374	2.65754	2.68369	2.74135	2.78659	2.85704	2.96278	3.05324
	10	2.82241	2.75534	2.66616	2.28587	1.4896	1.28253	1.3474	1.29684	0.115248	3.09409	3.04627	3.05384	3.06832	3.10475	3.07737	3.08914	2.97151
	11	2.54648	2.47389	2.33337	1.9719	1.58335	1.43951	1.47778	1.49868	1.15685	0.684047	0.41278	0.27266	0.175567	0.120527	0.0388323	0.0334832	3.05246
	12	2.30259	2.21324	2.09916	1.88245	1.61237	1.52253	1.5482	1.58452	1.44686	1.15379	0.7956	0.487871	0.318935	0.21085	0.132124	0.0945263	3.13065
	13	2.20772	2.07081	1.99041	1.84125	1.69183	1.62744	1.61329	1.60693	1.53997	1.36126	1.04747	0.610378	0.38532	0.291251	0.17567	0.105283	0.0366032
	14		2.07219	2.02212	1.93816	1.8132	1.70634	1.62187	1.65188	1.63382	1.50281	1.246	0.803774	0.518124	0.434599	0.31341	0.198026
	15			2.02028	1.97265	1.82079	1.68899	1.60799	1.66469	1.73108	1.56943	1.30969	0.991874	0.784814	0.687041	0.569554
	16				1.98231	1.83725	1.69934	1.59994	1.6712	1.75632	1.629	1.35325	1.10773	0.934284	0.855035
	17						1.7386	1.54699	1.64746	1.75098	1.62476	1.32949	1.13302	1.00599
10	1					1.57949	1.71831	1.78207	1.94141	2.24239	2.49034	2.63249	2.74724	2.79589					10																		10
	2					1.61383	1.7356	1.80858	2.08386	2.45133	2.60526	2.71803	2.87257	2.8463	2.63561
	3			1.22295	1.52137	1.67393	1.81659	1.88897	2.19074	2.59176	2.72909	2.82808	2.86155	2.91259	2.77224	2.67734
	4		0.873401	1.26067	1.5656	1.67412	1.86615	2.01039	2.31398	2.62623	2.80867	2.77594	2.80706	2.75374	2.73198	2.71956	2.67821
	5	0.651447	0.952137	1.26244	1.54328	1.65638	1.85905	2.02431	2.28241	2.58555	2.69149	2.71649	2.50253	2.44366	2.60686	2.63512	2.6776	2.71536
	6	0.574255	0.91881	1.19336	1.46904	1.61187	1.83295	1.95043	2.10392	2.38494	2.49103	2.43172	2.32633	2.30747	2.36329	2.59644	2.68517	2.8877
	7	0.38452	0.764498	1.01251	1.36763	1.6264	1.81993	1.91965	1.99929	2.18579	2.29837	2.35786	2.35065	2.38821	2.46906	2.67344	2.78847	3.04562
	8	0.124979	0.318834	0.610526	1.2147	1.66985	1.91623	2.01079	2.05915	2.22255	2.34946	2.40253	2.40933	2.47699	2.57642	2.7206	2.87316	3.07804
	9	3.07507	3.11427	0.0420584	0.623683	1.54509	2.03152	2.13687	2.19262	2.42779	2.56199	2.62058	2.67071	2.72271	2.78582	2.83404	2.87271	2.89097
	10	2.81345	2.78422	2.6785	2.26545	1.42867	1.14146	1.04313	1.0679	0.0801203	3.06098	3.01631	3.00501	2.99561	2.9944	2.96266	2.93855	2.77452
	11	2.50947	2.3955	2.25776	1.93564	1.58003	1.42427	1.39184	1.4265	1.15327	0.711578	0.419774	0.240516	0.123715	0.0514087	3.09944	3.05314	2.92341
	12	2.26121	2.1753	2.04832	1.84731	1.61705	1.48645	1.49373	1.52764	1.43075	1.16379	0.833619	0.490888	0.284192	0.151949	0.020714	3.09105	2.99481
	13	2.1911	2.02785	1.93083	1.83714	1.6887	1.60788	1.55959	1.59388	1.51374	1.34546	1.08521	0.674385	0.434421	0.308915	0.155248	0.00352229	3.11985
	14		2.02004	1.95625	1.90006	1.80145	1.69854	1.58793	1.6036	1.58082	1.4446	1.24422	0.85108	0.615949	0.497841	0.352853	0.194644
	15			1.95758	1.97281	1.83707	1.70268	1.58793	1.6382	1.6618	1.50629	1.2229	0.966191	0.790386	0.709069	0.554927
	16				2.01383	1.85559	1.69328	1.56883	1.64159	1.69118	1.54535	1.28955	1.06554	0.922878	0.859504
	17						1.73388	1.53351	1.64601	1.72448	1.58551	1.26805	1.08534	0.976669
