# Supplementary material for: Stationary Atrial Fibrillation Properties in the Goat Do Not Entail Stable or Recurrent Conduction Patterns
Source: Front Physiol. 2018 Jul 27;9:947. doi: 10.3389/fphys.2018.00947 (PMC6072874; doi:10.3389/fphys.2018.00947)
Supplement: Supplementary file 1 [file Data_Sheet_1.ZIP › Goat_3_Property maps.xlsx]

## Sheet: AFCL
AFCL
Signals of insufficient quality were excluded from the property maps. Signals could be rejected based on noise low amplitude, large artefact or ventricluar farfields that could not be substracted.
		1	2	3	4	5	6	7	8	9	10	11	12	13	14	15	16	17
1	1					0.12512	0.127045	0.12897	0.126083	0.128008	0.131858	0.13282	0.131858	0.133301					1																		1
	2					0.137151	0.138595	0.138595	0.135707	0.133782	0.129933	0.133782	0.131858	0.13282	0.13282
	3			0.138595	0.141001	0.138595	0.137632	0.135707	0.13667	0.133782	0.13282	0.12897	0.133782	0.131858	0.13282	0.131858
	4		0.133782	0.131858	0.137632	0.14052	0.138595	0.13667	0.13667	0.133782	0.13282	0.13282	0.129933	0.133782	0.131858	0.133782	0.131858
	5	0.131858	0.12897	0.127045	0.129933	0.131376	0.13282	0.138595	0.134745	0.133782	0.133782	0.133782	0.13282	0.131858	0.133782	0.13282	0.133782	0.133301
	6	0.13282	0.12897	0.130895	0.12897	0.126083	0.12512	0.12897	0.127045	0.129933	0.135707	0.134745	0.133782	0.13282	0.133782	0.133782	0.133782	0.134745
	7	0.129933	0.12897	0.129933	0.129933	0.124158	0.12512	0.123195	0.126083	0.127526	0.135707	0.134745	0.13282	0.13282	0.133782	0.135707	0.13667	0.135707
	8	0.128008	0.128008	0.126083	0.128008	0.128008	0.124158	0.12127	0.123195	0.128008	0.13282	0.133782	0.130895	0.131858	0.134745	0.134745	0.133782	0.134745
	9	0.127045	0.126083	0.12512	0.126083	0.127045	0.123195	0.12127	0.12127	0.127045	0.129933	0.129933	0.131858	0.133782	0.129933	0.129933	0.129933	0.13282
	10	0.127045	0.129933	0.128008	0.12512	0.127045	0.124158	0.12127	0.12127	0.124158	0.128008	0.130895	0.133782	0.13282	0.126083	0.12897	0.129933	0.128008
	11	0.127045	0.127045	0.127045	0.128008	0.130895	0.124158	0.122233	0.12127	0.124158	0.126083	0.130895	0.134745	0.127045	0.126083	0.128008	0.129933	0.128008
	12	0.124158	0.123677	0.124158	0.126083	0.128008	0.126083	0.122233	0.123195	0.124158	0.126083	0.128489	0.131858	0.126083	0.12512	0.125602	0.12897	0.126083
	13	0.122233	0.122233	0.123195	0.124158	0.127045	0.12897	0.12127	0.123195	0.123195	0.12512	0.12512	0.124158	0.127526	0.123195	0.124158	0.126083	0.123195
	14		0.123195	0.123195	0.122233	0.122233	0.123195	0.122233	0.122233	0.122233	0.123195	0.122233	0.12127	0.12512	0.122233	0.123195	0.123195
	15			0.120308	0.12127	0.12127	0.12127	0.122233	0.120308	0.122233	0.122233	0.12127	0.122233	0.126083	0.12127	0.12127
	16				0.120308	0.120308	0.120308	0.120308	0.120308	0.122233	0.12127	0.120308	0.124158	0.124158	0.12127
	17					0.120308	0.119346	0.120308	0.120308	0.12127	0.120789	0.120308	0.12127	0.12127
2	1					0.128008	0.129933	0.129933	0.126083	0.12897	0.131858	0.13282	0.13282	0.133782					2																		2
	2					0.138595	0.139557	0.139557	0.137632	0.135707	0.12897	0.13282	0.131858	0.13282	0.133301
	3			0.138595	0.142445	0.139557	0.138595	0.137632	0.137632	0.135707	0.134745	0.129933	0.133782	0.131858	0.13282	0.13282
	4		0.134745	0.134264	0.139557	0.142445	0.138595	0.137632	0.137632	0.135707	0.133782	0.13282	0.130895	0.133782	0.131858	0.13282	0.13282
	5	0.13282	0.129933	0.129933	0.131858	0.13282	0.134745	0.138595	0.137632	0.135707	0.134745	0.133782	0.13282	0.13282	0.133782	0.13282	0.133782	0.133782
	6	0.133782	0.130895	0.130895	0.130895	0.128008	0.128008	0.131858	0.128008	0.13282	0.13667	0.135707	0.134745	0.133782	0.134264	0.134745	0.13282	0.133782
	7	0.130895	0.129933	0.131858	0.130895	0.127045	0.127045	0.123195	0.126083	0.12897	0.137632	0.135707	0.134745	0.134745	0.135707	0.13667	0.140038	0.136189
	8	0.129933	0.128008	0.126083	0.12897	0.129933	0.12512	0.120308	0.122233	0.13282	0.133782	0.135707	0.13282	0.133782	0.134745	0.137632	0.134745	0.134745
	9	0.128008	0.127045	0.126083	0.126083	0.128008	0.124158	0.120308	0.120308	0.128008	0.131858	0.131858	0.133782	0.134745	0.133782	0.133782	0.13282	0.134745
	10	0.127045	0.13282	0.12897	0.127045	0.12897	0.126083	0.120308	0.119827	0.124158	0.131858	0.13282	0.134745	0.133782	0.129933	0.130895	0.131858	0.130895
	11	0.128008	0.128008	0.12897	0.130895	0.131858	0.127045	0.12127	0.12127	0.124158	0.128008	0.134745	0.135707	0.12897	0.129933	0.130895	0.13282	0.129933
	12	0.127045	0.126083	0.127045	0.127045	0.130895	0.12897	0.122233	0.122233	0.124158	0.126083	0.131858	0.134745	0.12897	0.128008	0.129933	0.131858	0.128008
	13	0.124158	0.124158	0.12512	0.126083	0.128008	0.13282	0.12127	0.123195	0.122233	0.12512	0.126083	0.126083	0.130895	0.124158	0.126083	0.128008	0.12512
	14		0.124158	0.124158	0.124158	0.123195	0.126083	0.122233	0.122233	0.122233	0.123195	0.123195	0.123195	0.128008	0.123195	0.124158	0.124158
	15			0.12127	0.12127	0.12127	0.122233	0.122233	0.12127	0.12127	0.122233	0.12127	0.123195	0.128008	0.122233	0.122233
	16				0.120308	0.120308	0.120308	0.12127	0.12127	0.122233	0.12127	0.12127	0.127045	0.126083	0.122233
	17					0.120308	0.12127	0.12127	0.120308	0.12127	0.12127	0.12127	0.123195	0.123195
3	1					0.126564	0.126083	0.128008	0.12512	0.128008	0.131858	0.131858	0.131858	0.131858					3																		3
	2					0.135707	0.137632	0.137632	0.134745	0.133782	0.129933	0.131858	0.131858	0.131858	0.131858
	3			0.134745	0.13667	0.137632	0.137632	0.13667	0.135707	0.133301	0.13282	0.129933	0.13282	0.131858	0.13282	0.131858
	4		0.131858	0.131858	0.135707	0.137632	0.137632	0.135707	0.135707	0.133782	0.13282	0.13282	0.129933	0.13282	0.131858	0.13282	0.131858
	5	0.129933	0.126083	0.124158	0.127045	0.12897	0.130895	0.13667	0.133782	0.133782	0.133782	0.133301	0.13282	0.131858	0.133782	0.131858	0.13282	0.13282
	6	0.131858	0.127045	0.128008	0.126083	0.124158	0.124158	0.12897	0.126083	0.130414	0.134745	0.134264	0.133301	0.13282	0.133782	0.133782	0.133782	0.133782
	7	0.129933	0.127045	0.126083	0.126083	0.123195	0.123195	0.12127	0.12512	0.127045	0.133782	0.13282	0.13282	0.132339	0.133782	0.135707	0.133782	0.13667
	8	0.127045	0.12512	0.124158	0.12512	0.126083	0.122233	0.119346	0.12127	0.126083	0.130895	0.13282	0.131858	0.131858	0.133782	0.13282	0.131858	0.133782
	9	0.12512	0.124158	0.124158	0.124158	0.12512	0.12127	0.119346	0.120308	0.12512	0.128489	0.129933	0.131858	0.13282	0.12897	0.129933	0.12897	0.129451
	10	0.12512	0.129933	0.126083	0.124158	0.126083	0.123195	0.119346	0.119346	0.123195	0.126083	0.129933	0.13282	0.130414	0.127045	0.127045	0.12897	0.127045
	11	0.12512	0.12512	0.126083	0.128008	0.12897	0.123195	0.120308	0.119346	0.122233	0.124158	0.129933	0.133782	0.128008	0.127045	0.128008	0.12897	0.127045
	12	0.124158	0.123195	0.123195	0.12512	0.127045	0.127045	0.12127	0.12127	0.12127	0.12512	0.127045	0.130895	0.127045	0.12512	0.127045	0.12897	0.126083
	13	0.122233	0.122233	0.122233	0.123195	0.126083	0.128008	0.119346	0.122233	0.12127	0.123195	0.123195	0.124158	0.127045	0.124158	0.124158	0.12512	0.123195
	14		0.122233	0.123195	0.122233	0.12127	0.122233	0.12127	0.12127	0.12127	0.12127	0.12127	0.122233	0.126083	0.122233	0.122233	0.122233
	15			0.120308	0.120308	0.120308	0.120308	0.12127	0.119346	0.12127	0.120308	0.120308	0.123195	0.126083	0.12127	0.12127
	16				0.119346	0.119346	0.119346	0.120308	0.119346	0.120308	0.120308	0.120308	0.124158	0.124158	0.122233
	17					0.119346	0.119346	0.119346	0.120308	0.120308	0.120308	0.120308	0.122233	0.122233
4	1					0.12512	0.127045	0.127045	0.124158	0.127045	0.130895	0.131858	0.131858	0.131858					4																		4
	2					0.13667	0.13667	0.137632	0.134745	0.133782	0.128008	0.130895	0.130895	0.131858	0.131858
	3			0.137632	0.139557	0.139557	0.13667	0.134745	0.135707	0.13282	0.131858	0.128008	0.131858	0.130895	0.131858	0.131858
	4		0.133301	0.131858	0.138595	0.139557	0.13667	0.134745	0.134745	0.131858	0.131858	0.131858	0.12897	0.13282	0.130895	0.131858	0.131858
	5	0.131858	0.12512	0.123195	0.125602	0.128008	0.130895	0.135226	0.133782	0.133782	0.13282	0.13282	0.131858	0.130895	0.131858	0.131858	0.131858	0.131858
	6	0.131858	0.126083	0.127045	0.124158	0.123195	0.124158	0.128008	0.12512	0.12897	0.134745	0.133782	0.13282	0.131858	0.13282	0.13282	0.131858	0.13282
	7	0.128008	0.126083	0.126083	0.126083	0.122233	0.123195	0.12127	0.123195	0.12512	0.133782	0.133782	0.131858	0.131858	0.13282	0.134264	0.135707	0.134745
	8	0.126083	0.12512	0.123195	0.12512	0.126083	0.12127	0.119346	0.120308	0.124158	0.130895	0.13282	0.129933	0.130895	0.13282	0.134264	0.131858	0.130895
	9	0.12512	0.124158	0.122233	0.122233	0.124158	0.12127	0.119346	0.119346	0.12512	0.12897	0.12897	0.130895	0.131858	0.12897	0.12897	0.128008	0.129933
	10	0.124158	0.128008	0.12512	0.122233	0.126083	0.123195	0.119346	0.119346	0.123195	0.127045	0.12897	0.13282	0.129933	0.127045	0.126083	0.12897	0.126564
	11	0.12512	0.12512	0.12512	0.128008	0.129933	0.123195	0.119346	0.119346	0.122714	0.12512	0.129451	0.13282	0.127045	0.127045	0.126083	0.12897	0.126083
	12	0.123195	0.122233	0.123195	0.124158	0.12897	0.126083	0.120308	0.12127	0.122233	0.12512	0.128008	0.129933	0.126083	0.124158	0.12512	0.12897	0.12512
	13	0.12127	0.12127	0.12127	0.122714	0.126083	0.129933	0.118383	0.12127	0.12127	0.122233	0.124158	0.122233	0.126083	0.12127	0.122233	0.124158	0.121752
	14		0.12127	0.122233	0.120308	0.120308	0.122233	0.118864	0.120308	0.120308	0.12127	0.12127	0.120308	0.12512	0.120308	0.120308	0.12127
	15			0.119346	0.119346	0.119346	0.119346	0.120308	0.118383	0.120308	0.120308	0.119346	0.122233	0.12512	0.119346	0.119346
	16				0.118383	0.118383	0.119346	0.119346	0.118383	0.120308	0.119346	0.119346	0.124158	0.123195	0.120308
	17					0.118383	0.118383	0.118864	0.118383	0.118383	0.119346	0.118383	0.12127	0.120308
5	1					0.12512	0.126083	0.127045	0.12512	0.126083	0.129933	0.129933	0.129933	0.130895					5																		5
	2					0.135707	0.137632	0.137632	0.134745	0.13282	0.127045	0.130895	0.129933	0.130895	0.130895
	3			0.135707	0.137632	0.138595	0.137632	0.13667	0.13667	0.133782	0.131858	0.128008	0.131858	0.129933	0.130895	0.130895
	4		0.13282	0.131858	0.132339	0.139557	0.137632	0.13667	0.137632	0.13282	0.131858	0.130895	0.128008	0.131858	0.129933	0.130895	0.130895
	5	0.129933	0.126083	0.12512	0.127045	0.128008	0.130895	0.138114	0.133782	0.13282	0.13282	0.131858	0.131858	0.129933	0.130895	0.129933	0.130895	0.130895
	6	0.130895	0.127045	0.127045	0.126083	0.124158	0.12512	0.128008	0.12512	0.12897	0.134745	0.133782	0.13282	0.130895	0.13282	0.131858	0.130414	0.131858
	7	0.128008	0.126083	0.126083	0.127045	0.12512	0.124158	0.12127	0.123195	0.12512	0.133782	0.13282	0.131858	0.131858	0.13282	0.13282	0.139557	0.13667
	8	0.12512	0.123195	0.122233	0.124158	0.12512	0.122233	0.120308	0.12127	0.124158	0.129933	0.131858	0.129933	0.131858	0.13282	0.13282	0.131376	0.13282
	9	0.12512	0.124158	0.123195	0.123195	0.12512	0.121752	0.119346	0.119346	0.126083	0.12897	0.12897	0.131858	0.13282	0.12897	0.128489	0.12897	0.12897
	10	0.124158	0.127045	0.12512	0.122233	0.126083	0.123195	0.120308	0.120308	0.122233	0.127045	0.129933	0.13282	0.129933	0.127045	0.126083	0.12897	0.126564
	11	0.124158	0.124158	0.12512	0.126083	0.128008	0.123195	0.120308	0.120308	0.122233	0.12512	0.131858	0.133301	0.126083	0.126083	0.128008	0.128489	0.12512
	12	0.123195	0.122233	0.122233	0.122233	0.126083	0.126083	0.12127	0.12127	0.12127	0.123195	0.128008	0.129933	0.127045	0.124158	0.126083	0.128008	0.122233
	13	0.120308	0.120308	0.121752	0.123195	0.124158	0.127045	0.120308	0.122233	0.120308	0.12127	0.122233	0.12127	0.126083	0.122233	0.122233	0.122233	0.12127
	14		0.122233	0.12127	0.120308	0.119346	0.120308	0.120308	0.120308	0.120308	0.120308	0.120308	0.120308	0.12512	0.120308	0.120308	0.120308
	15			0.119346	0.119346	0.119346	0.119346	0.119346	0.119346	0.119346	0.119346	0.119346	0.122233	0.12512	0.120308	0.120308
	16				0.118383	0.119346	0.119346	0.119346	0.119346	0.120308	0.119346	0.119346	0.122233	0.12127	0.120308
	17					0.119346	0.119346	0.119346	0.119346	0.119346	0.119346	0.119346	0.120308	0.120308
6	1					0.126083	0.128008	0.12897	0.126083	0.127045	0.131858	0.130895	0.130895	0.131858					6																		6
	2					0.135707	0.13667	0.13667	0.134745	0.13282	0.12897	0.131858	0.129933	0.130895	0.130895
	3			0.135707	0.137632	0.137632	0.137632	0.13667	0.13667	0.13282	0.131858	0.128008	0.13282	0.129933	0.130895	0.130895
	4		0.13282	0.13282	0.133782	0.14052	0.137632	0.137151	0.135707	0.13282	0.131858	0.130895	0.12897	0.131858	0.130895	0.130895	0.130895
	5	0.131858	0.12897	0.127045	0.12897	0.130895	0.13282	0.137632	0.133782	0.13282	0.131858	0.131858	0.130895	0.130895	0.131376	0.129933	0.130895	0.131858
	6	0.13282	0.129933	0.129451	0.128008	0.127045	0.127045	0.129933	0.127045	0.129933	0.134745	0.133782	0.133782	0.131858	0.13282	0.131858	0.131858	0.13282
	7	0.130895	0.128489	0.129933	0.129933	0.127045	0.127045	0.124158	0.12512	0.127045	0.133782	0.13282	0.13282	0.131858	0.133782	0.133782	0.135707	0.135707
	8	0.12897	0.128008	0.127045	0.128008	0.12897	0.124158	0.122233	0.124158	0.127045	0.131858	0.133782	0.131858	0.131858	0.13282	0.13282	0.13282	0.134745
	9	0.12897	0.128008	0.128008	0.127045	0.12897	0.126083	0.122233	0.122233	0.128008	0.130895	0.130895	0.13282	0.13282	0.129933	0.129933	0.129933	0.130895
	10	0.128008	0.129933	0.12897	0.127045	0.129933	0.127045	0.122233	0.122233	0.12512	0.12897	0.131858	0.133782	0.130895	0.127526	0.128008	0.129933	0.127045
	11	0.127045	0.127045	0.127045	0.12897	0.130895	0.126083	0.123195	0.123195	0.12512	0.128008	0.133782	0.133782	0.127045	0.128008	0.12897	0.130895	0.128008
	12	0.12512	0.12512	0.12512	0.12512	0.127045	0.12897	0.123195	0.123677	0.124158	0.12512	0.127045	0.129933	0.128008	0.126083	0.128008	0.130895	0.12512
	13	0.124158	0.124158	0.124158	0.12512	0.127045	0.129933	0.122233	0.124158	0.123195	0.12512	0.124158	0.123195	0.128008	0.123195	0.126083	0.126083	0.124158
	14		0.124158	0.124158	0.122233	0.12127	0.123195	0.123195	0.122233	0.122233	0.123195	0.122233	0.122233	0.126083	0.122233	0.124158	0.124158
	15			0.12127	0.12127	0.12127	0.12127	0.122233	0.122233	0.122233	0.122233	0.12127	0.12512	0.126083	0.121752	0.122233
	16				0.12127	0.120789	0.12127	0.12127	0.12127	0.122233	0.122233	0.122233	0.124158	0.124158	0.122233
	17					0.120308	0.12127	0.12127	0.12127	0.12127	0.12127	0.12127	0.122233	0.122233
7	1					0.12512	0.126083	0.126083	0.12512	0.127045	0.130895	0.130895	0.130895	0.131858					7																		7
	2					0.135707	0.137632	0.137632	0.134745	0.133782	0.128008	0.130895	0.129933	0.130895	0.130895
	3			0.135707	0.138595	0.137632	0.137632	0.13667	0.13667	0.13282	0.131858	0.127045	0.130895	0.129933	0.130895	0.130895
	4		0.134745	0.13282	0.13667	0.139557	0.137632	0.13667	0.13667	0.13282	0.131858	0.130895	0.128008	0.131858	0.129933	0.130895	0.129933
	5	0.131858	0.12897	0.126083	0.128008	0.12897	0.130895	0.138595	0.134745	0.133782	0.13282	0.131858	0.130895	0.129933	0.131858	0.129933	0.131858	0.131858
	6	0.13282	0.12897	0.128008	0.126083	0.124158	0.124158	0.128008	0.126083	0.129933	0.134745	0.133782	0.13282	0.131858	0.13282	0.13282	0.131858	0.13282
	7	0.128008	0.127045	0.128008	0.128008	0.12512	0.124158	0.123195	0.124158	0.126083	0.134745	0.133782	0.13282	0.131858	0.133782	0.135707	0.138595	0.138595
	8	0.126083	0.126083	0.12512	0.126083	0.127045	0.124158	0.12127	0.122233	0.12512	0.131858	0.13282	0.129933	0.131376	0.13282	0.13282	0.13282	0.135226
	9	0.126083	0.126083	0.124639	0.12512	0.127045	0.124158	0.120308	0.12127	0.126083	0.129933	0.129933	0.130895	0.13282	0.129933	0.130895	0.129933	0.130895
	10	0.126083	0.12897	0.127045	0.124158	0.128008	0.12512	0.120308	0.12127	0.124158	0.127045	0.129933	0.13282	0.130895	0.12897	0.128008	0.12897	0.128008
	11	0.126083	0.127045	0.128008	0.12897	0.129933	0.12512	0.123195	0.12127	0.124158	0.126083	0.130895	0.131858	0.127045	0.12897	0.128008	0.12897	0.128008
	12	0.126083	0.126083	0.12512	0.126083	0.128008	0.126083	0.122233	0.123195	0.123195	0.126083	0.128008	0.12897	0.12897	0.127045	0.127045	0.129933	0.126083
	13	0.124158	0.124158	0.124158	0.12512	0.127045	0.129933	0.12127	0.123195	0.123195	0.124158	0.124158	0.123195	0.128008	0.123195	0.12512	0.126083	0.123195
	14		0.124158	0.12512	0.122233	0.122233	0.124158	0.123195	0.122233	0.122233	0.123195	0.122233	0.122233	0.126083	0.122233	0.124158	0.123195
	15			0.12127	0.122233	0.12127	0.122233	0.123195	0.12127	0.122233	0.122233	0.122233	0.124158	0.126083	0.12127	0.122233
	16				0.12127	0.12127	0.12127	0.12127	0.12127	0.122233	0.121752	0.12127	0.124158	0.124158	0.12127
	17					0.122233	0.12127	0.12127	0.12127	0.12127	0.12127	0.12127	0.122233	0.122233
8	1					0.126083	0.128008	0.128008	0.126083	0.12897	0.130895	0.129933	0.129933	0.130895					8																		8
	2					0.135707	0.137632	0.137632	0.134745	0.133782	0.12897	0.131858	0.129933	0.130895	0.129933
	3			0.134745	0.138595	0.137632	0.137632	0.13667	0.13667	0.133782	0.13282	0.12897	0.131858	0.129933	0.130895	0.130895
	4		0.131858	0.129933	0.135707	0.137632	0.137632	0.13667	0.13667	0.134745	0.13282	0.131858	0.12897	0.13282	0.129933	0.131858	0.130895
	5	0.130895	0.127045	0.126564	0.128008	0.128008	0.130895	0.13667	0.134745	0.134745	0.133782	0.13282	0.131858	0.130895	0.131858	0.129933	0.131858	0.130895
	6	0.130895	0.127045	0.12897	0.127045	0.12512	0.127045	0.12897	0.126083	0.129933	0.135226	0.134745	0.134745	0.13282	0.13282	0.13282	0.131858	0.13282
	7	0.12897	0.12897	0.128008	0.12897	0.127045	0.126083	0.123195	0.126083	0.128008	0.135707	0.133782	0.131858	0.130895	0.131858	0.134264	0.135707	0.133782
	8	0.128008	0.127045	0.126083	0.127045	0.127045	0.124158	0.120308	0.123195	0.127045	0.131858	0.13282	0.129933	0.130895	0.131858	0.131858	0.131858	0.13282
	9	0.127045	0.127045	0.126083	0.126083	0.128008	0.123195	0.120308	0.12127	0.127045	0.130895	0.12897	0.131858	0.131858	0.12897	0.128008	0.128008	0.12897
	10	0.127045	0.12897	0.127045	0.12512	0.128008	0.12512	0.12127	0.120789	0.124158	0.128008	0.129933	0.13282	0.12897	0.127045	0.127045	0.128008	0.127045
	11	0.126083	0.126083	0.126083	0.127045	0.12897	0.12512	0.121752	0.12127	0.124158	0.127045	0.131858	0.133782	0.126083	0.127045	0.128008	0.128008	0.126083
	12	0.124158	0.123195	0.123195	0.124158	0.126083	0.12897	0.122233	0.123195	0.123195	0.126083	0.12897	0.131376	0.127045	0.125602	0.126083	0.12897	0.124158
	13	0.123195	0.122233	0.123195	0.124158	0.127045	0.131858	0.12127	0.123195	0.123195	0.124158	0.124158	0.122233	0.126083	0.123195	0.123195	0.124158	0.122233
	14		0.123195	0.123195	0.12127	0.12127	0.123195	0.122233	0.122233	0.122233	0.122233	0.12127	0.12127	0.12512	0.122233	0.122233	0.12127
	15			0.12127	0.12127	0.12127	0.12127	0.122233	0.12127	0.122233	0.12127	0.120308	0.123195	0.126564	0.12127	0.12127
	16				0.120308	0.120308	0.12127	0.122233	0.12127	0.12127	0.120308	0.12127	0.124158	0.123195	0.12127
	17					0.120308	0.120789	0.12127	0.12127	0.120308	0.120308	0.120308	0.12127	0.12127
9	1					0.126083	0.126564	0.12897	0.127045	0.12897	0.131858	0.130895	0.130895	0.130895					9																		9
	2					0.134745	0.13667	0.137632	0.135226	0.13282	0.12897	0.131858	0.129933	0.130895	0.131858
	3			0.137632	0.139557	0.138595	0.137632	0.13667	0.13667	0.13282	0.131858	0.129933	0.13282	0.129933	0.131858	0.130895
	4		0.133782	0.130895	0.134745	0.139557	0.13667	0.13667	0.135707	0.133782	0.13282	0.131858	0.129933	0.13282	0.130895	0.131858	0.130895
	5	0.131858	0.128008	0.12512	0.127045	0.127045	0.130895	0.13667	0.133782	0.133782	0.13282	0.13282	0.131858	0.131376	0.13282	0.130895	0.13282	0.131858
	6	0.130414	0.12897	0.128008	0.12512	0.124158	0.124158	0.128008	0.127045	0.129933	0.135707	0.133782	0.13282	0.131858	0.133782	0.133782	0.133782	0.134745
	7	0.128008	0.127045	0.127045	0.128008	0.12512	0.123195	0.122233	0.124158	0.127045	0.133782	0.13282	0.131858	0.131858	0.133782	0.13667	0.14052	0.137632
	8	0.126083	0.12512	0.124158	0.12512	0.126083	0.123195	0.120308	0.122233	0.127045	0.131858	0.13282	0.130414	0.13282	0.133782	0.134745	0.133782	0.133782
	9	0.126083	0.126083	0.12512	0.124158	0.126083	0.123195	0.120308	0.120308	0.126083	0.129933	0.129933	0.131858	0.133782	0.129933	0.129933	0.129933	0.12897
	10	0.126083	0.129933	0.128008	0.124158	0.127045	0.124158	0.12127	0.120308	0.124158	0.128008	0.129933	0.13282	0.130414	0.128008	0.127045	0.12897	0.127045
	11	0.126083	0.126083	0.126083	0.127045	0.129933	0.124158	0.12127	0.12127	0.124639	0.126083	0.13282	0.13282	0.127045	0.127045	0.12897	0.12897	0.128008
	12	0.12512	0.123195	0.123677	0.124158	0.127045	0.128008	0.12127	0.123195	0.122233	0.124158	0.128008	0.130895	0.127045	0.124158	0.127526	0.12897	0.12512
	13	0.123195	0.123195	0.124158	0.12512	0.126564	0.129933	0.120308	0.122233	0.12127	0.124158	0.123195	0.122233	0.126564	0.122233	0.124158	0.124158	0.12127
	14		0.123195	0.123195	0.12127	0.12127	0.122233	0.122233	0.12127	0.12127	0.122233	0.12127	0.12127	0.12512	0.12127	0.122233	0.12127
	15			0.120308	0.12127	0.12127	0.12127	0.12127	0.12127	0.121752	0.12127	0.120308	0.124158	0.12512	0.12127	0.120308
	16				0.12127	0.120308	0.120308	0.12127	0.120308	0.12127	0.12127	0.12127	0.122233	0.123195	0.12127
	17					0.12127	0.12127	0.12127	0.120308	0.12127	0.120308	0.120308	0.12127	0.12127
10	1					0.126083	0.127045	0.127526	0.126083	0.128008	0.130895	0.130895	0.130895	0.130895					10																		10
	2					0.133782	0.135707	0.13667	0.13282	0.131858	0.128008	0.130895	0.129933	0.130895	0.129933
	3			0.135707	0.137632	0.135707	0.135707	0.133782	0.133782	0.130895	0.130895	0.128008	0.130895	0.129933	0.130895	0.130895
	4		0.13282	0.130895	0.131858	0.13667	0.13667	0.134745	0.134745	0.13282	0.130895	0.130895	0.12897	0.130895	0.129933	0.130895	0.130895
	5	0.130895	0.126083	0.124158	0.12512	0.126083	0.12897	0.134745	0.13282	0.133782	0.131858	0.131858	0.130895	0.130895	0.130895	0.129933	0.130895	0.130895
	6	0.129933	0.127045	0.126564	0.12512	0.123195	0.124158	0.12897	0.127045	0.12897	0.134745	0.133782	0.13282	0.130895	0.13282	0.131858	0.130895	0.131858
	7	0.128008	0.126083	0.12512	0.126083	0.123195	0.124158	0.123195	0.12512	0.127045	0.133782	0.13282	0.130895	0.130895	0.131858	0.133782	0.135707	0.135707
	8	0.124158	0.124158	0.123195	0.124158	0.126083	0.124158	0.122233	0.123677	0.12512	0.129933	0.130895	0.129933	0.129933	0.130895	0.130895	0.130895	0.131858
	9	0.12512	0.12512	0.124158	0.124158	0.12512	0.12512	0.12127	0.122233	0.127045	0.128489	0.129451	0.130895	0.130895	0.128008	0.128008	0.129933	0.12897
	10	0.124158	0.127045	0.126083	0.124158	0.127045	0.124158	0.122233	0.12127	0.12512	0.128008	0.129933	0.131858	0.127526	0.126083	0.128008	0.12897	0.126083
	11	0.12512	0.12512	0.12512	0.12512	0.127045	0.124158	0.122714	0.122233	0.124158	0.126083	0.130895	0.130895	0.126083	0.127045	0.127526	0.129933	0.127045
	12	0.123195	0.123195	0.123195	0.124158	0.126083	0.128008	0.122233	0.123195	0.123195	0.124158	0.126083	0.128008	0.126083	0.124158	0.127045	0.129933	0.12512
	13	0.123195	0.123195	0.123195	0.123195	0.12512	0.126083	0.12127	0.122233	0.122233	0.123195	0.124158	0.123195	0.12512	0.123195	0.124158	0.12512	0.123195
	14		0.122233	0.123195	0.12127	0.12127	0.122233	0.122233	0.12127	0.122233	0.123195	0.12127	0.123195	0.124639	0.122233	0.123195	0.122233
	15			0.120308	0.12127	0.12127	0.12127	0.122233	0.12127	0.122233	0.12127	0.12127	0.124158	0.12512	0.122233	0.12127
	16				0.12127	0.12127	0.12127	0.12127	0.12127	0.12127	0.122233	0.122233	0.124158	0.123195	0.122233
	17					0.12127	0.12127	0.12127	0.120789	0.12127	0.12127	0.12127	0.122233	0.122233

## Sheet: DISS
MaxDissociation
Signals of insufficient quality were excluded from the property maps. Signals could be rejected based on noise low amplitude, large artefact or ventricluar farfields that could not be substracted.
		1	2	3	4	5	6	7	8	9	10	11	12	13	14	15	16	17
1	1					25.3347	28.0633	28.8404	29.7275	25.2921	23.5142	20.467	16.0551	12.4812					1																		1
	2					32.2573	30.6	30.7745	30.6711	28.4324	27.27	25.4075	23.3444	17.7859	13.9093
	3			31.1739	42.4009	35.5342	27.1781	20.9229	20.3523	23.3742	22.8518	27.2602	26.2494	24.8414	21.1258	15.128
	4		23.2366	35.1987	42.5365	42.1517	34.9226	31.0843	25.9614	21.566	19.7044	22.1656	26.7279	26.8914	25.6998	22.4845	16.5969
	5	18.9802	24.0086	27.1631	31.4797	36.1094	39.6173	41.0363	37.5638	33.118	26.5011	22.0891	23.0877	26.3296	28.0909	26.0596	22.8938	15.9047
	6	23.1601	27.0817	25.0172	23.8504	28.5233	34.3227	36.9319	38.0464	37.6226	34.4844	27.2661	25.2035	24.9292	28.3385	31.9558	34.4128	30.4656
	7	23.5804	26.8534	25.1902	22.6717	22.0716	24.8172	24.4593	35.327	39.0042	38.9316	28.3333	24.1982	22.8282	26.9846	34.9219	39.0608	34.1506
	8	18.0968	21.4356	20.286	22.8662	24.1083	21.8503	18.2	31.9814	39.2004	37.4978	28.9716	23.1822	21.0837	26.5548	31.7506	33.6253	28.5698
	9	22.6398	24.6173	24.9855	23.2218	24.3362	22.749	14.7976	29.4503	32.7479	35.0065	28.365	23.1874	23.8923	27.2091	27.1842	26.3043	21.6957
	10	27.5191	30.8256	31.083	29.8761	30.482	25.7025	15.7546	17.0589	22.7625	30.3233	30.4416	28.6543	25.9717	25.481	23.4492	23.4978	19.3397
	11	25.4105	29.4391	30.2632	28.2357	31.4073	29.8574	19.4294	17.5254	21.5652	29.5464	33.2909	29.348	25.6561	22.3179	25.2845	25.4482	19.5148
	12	12.0248	13.7764	16.0248	21.7558	30.148	32.5714	25.2813	18.6646	20.4144	26.6996	29.6552	29.7597	26.8866	21.4937	25.309	24.5432	18.4447
	13	9.93047	13.4353	17.8406	22.0501	30.242	33.3319	29.7789	18.5	18.6803	20.6192	23.7668	26.4874	25.5244	20.905	21.8037	20.6221	15.9714
	14		15.1922	17.9487	20.4429	24.7363	28.7146	27.3498	18.1464	16.8615	15.1166	15.6509	20.5214	20.3333	17.5583	14.6189	14.6237
	15			14.2162	13.8669	13.802	17.832	19.3218	17.1434	15.5598	11.9573	14.246	16.2033	17.6722	14.7053	9.91684
	16				7.40404	8.12348	9.87273	13.2263	13.2065	12.8603	10.0949	13.1048	15.0902	15.1885	12.1365
	17					5.74089	6.13333	8.13535	8.46964	9.13333	7.31717	10.3051	10.6842	9.97154
2	1					23.1906	25.8186	26.4504	27.3059	25.7692	22.2791	19.0199	16.7289	13.8594					2																		2
	2					29.1419	28.2079	28.7275	28.9112	28.9978	26.9764	25.3516	22.7422	17.5022	14.1492
	3			28.3202	37.8538	31.873	25.1889	18.0803	20.4908	26.2841	25.8667	26.6	26.896	23.9135	19.7644	15.1
	4		22.3128	32.9797	39.3449	37.7739	31.354	26.9725	22.9519	21.2232	22.9911	24.4471	26.8978	27.1104	24.9668	21.1311	16.9333
	5	18.7556	23.1193	26.5974	30.4245	33.9534	35.5798	35.5648	32.1689	29.5383	23.4454	22.1375	24.042	25.8869	26.9867	24.6741	22.66	17.2081
	6	20.6741	25.2205	23.4091	22.8802	25.5776	32.7376	33.8	33.6518	31.7251	28.2642	22.491	22.0426	25.4523	26.8271	30.3879	31.971	27.7906
	7	20.0568	25.1217	24.1842	21.9278	22.2704	25.2698	22.9078	32.2812	35.985	34.6273	23.545	20.8333	21.6659	24.9599	32.4899	36.1963	31.8702
	8	15.3063	19.3693	20.0761	22.0344	22.8774	21.1723	16.1557	28.471	37.7599	35.6147	27.0492	20.6659	21.184	24.0424	28.8451	31.2165	27.1409
	9	20.3326	23.5032	23.3333	21.9556	23	20.7921	12.945	25.8299	31.5277	35.2196	28.3414	23.2102	22.54	24.1413	23.9426	24.6009	20.8945
	10	24.8882	29.8966	29.0521	27.9145	27.2974	22.7797	13.5265	15.3367	19.5657	29.8286	31.9757	27.6459	23.2004	23.1965	22.063	21.0197	17.6616
	11	23.8205	27.4582	28.7489	27.4245	28.5241	27.1043	18.3663	15.2152	19.2269	28.21	33.4633	30.0909	24.7361	21.8547	24.167	22.7608	17.0236
	12	12.1326	13.7194	16.5042	21.2281	28.8366	30.6878	22.4502	15.3457	17.559	24.5962	29.9651	30.0066	25.7876	21.072	25.2208	23.6395	16.789
	13	9.69102	12.9665	16.9706	21.9789	29.0494	31.1145	26.0764	15.6507	16.2887	19.8889	22.8089	24.8785	23.6996	20.4142	20.8581	19.2903	13.7233
	14		13.9749	17.7432	19.7296	22.6172	25.9705	24.2604	16.6268	15.5732	13.7662	14.0626	19.4389	18.8538	16.5875	13.8121	13.3063
	15			14.3251	13.9198	12.9587	16.5764	17.5	15.6235	14.3732	11.6923	13.8292	15.7256	16.5126	12.942	8.97521
	16				6.84156	7.32305	9.02062	12.268	12.4691	11.8388	9.69136	12.7305	14.1148	13.9453	10.6852
	17					5.29012	5.53593	7.70226	7.59754	8.20782	7.40246	11.2634	10.4194	9.64596
3	1					25.7242	28.3298	29.5137	30.3925	25.2495	23.0793	19.8089	16.3747	12.4444					3																		3
	2					31.1253	30.307	30.9093	30.951	28.8524	26.4989	24.6022	22.1929	17.4447	13.2115
	3			29.4206	38.3581	33.4364	25.3795	19.5837	19.5338	23.5276	22.0088	26.5224	25.0664	23.3053	19.8204	14.0881
	4		24.8004	35.024	41.4257	40.8955	34.4132	29.0181	22.3423	20.0044	21.0242	22.9714	26.5819	26.2262	24.1327	20.4298	15.7775
	5	20.9176	26.6324	28.8079	32.8358	36.8632	38.7659	39.6577	34.4744	30.9822	24.0244	23.0552	23.1903	25.6645	26.071	23.8252	21.0265	14.0998
	6	22.3589	26.4042	25.0338	24.4286	28.2241	36.0166	38.1851	36.2176	33.4685	31.1347	24.2683	22.4479	23.7196	26.6115	30	31.3252	26.9978
	7	21.8095	26.4653	25.6472	24.0634	24.2851	26.7971	26.084	36.5073	40.0589	38.9227	25.5033	21.7346	22.2363	26.7841	34.1247	36.4417	33.0926
	8	19.3814	22.6297	21.7031	23.2562	24.6025	23.2086	19.513	32.3605	40.4947	38.9848	28.0832	20.2848	22.6513	26.4057	31.4486	33.6391	27.3326
	9	23.7778	26.195	25.2236	23.7531	25.0459	23.002	15.8743	30.247	34.2816	36.9618	28.5443	24.9087	24.7196	26.6352	25.3241	25.1631	20.8587
	10	27.9623	31.4615	31.5937	30.25	30.2521	27.2526	17.268	18.2814	22.3722	30.704	32.3355	29.8463	26.1015	24.5432	22.08	21.8602	17.8803
	11	23.8309	27.9645	29.7027	29.4832	32.3779	31.3888	22.692	18.3194	21.4909	30.8017	34.7543	31.9978	26.317	20.6723	23.089	23.1776	18.1576
	12	11.5934	13.5163	16.3868	20.4253	31.3916	34.6346	27.7006	19.0665	19.8488	26.0329	30.3523	29.8172	25.2945	20.8559	23.9727	24.174	17.7724
	13	9.59959	13.851	18.7016	23.4764	31.1276	34.8447	30.0283	18.9696	18.4052	20.7239	23.1157	25.7583	25.4352	21	20.6605	20.7325	15.8012
	14		15.2317	19.6102	21.8557	25.5758	28.8626	27.5061	19.8044	17.1237	15.7383	16.2607	20.5274	21.6758	19.2261	14.2653	13.8239
	15			15.6157	14.3266	13.4708	18.3823	19.0929	18.4076	15.8664	12.9209	15.2254	17.5779	18.9255	16.3327	10.1091
	16				8.08434	8.78557	10.3574	13.6847	14.0543	13.2345	11.4024	14.7163	15.3967	15.8033	12.9818
	17					5.6012	5.72745	8.28457	8.69539	8.81563	8.33735	11.3219	12.1371	10.9335
4	1					26.92	29.7924	30.2637	30.9274	27.2034	22.9957	17.5714	14.4242	12.1325					4																		4
	2					33.3138	32.5147	32.4797	31.6208	29.766	26.0213	23.3189	20.1469	15.8502	12.7247
	3			30.4707	39.2072	34.0752	26.0068	20.264	20.1775	24.2039	22.4496	23.8213	23.6905	21.1495	17.7709	13.1388
	4		26.0527	35.1891	41.1745	39.8957	34.3824	29.7477	24.3955	20.9254	20.9364	21.4792	23.8026	23.4627	21.5033	18.4295	14.1429
	5	22.7052	26.4799	29.9669	32.9582	37.4852	39.8319	40.441	36.0795	31.7456	24.0552	21.2193	22.6594	23.8026	23.417	21.5956	18.9449	13.8088
	6	24.3565	28.4142	26.9623	25.5821	30.9918	37.7089	38.547	37.0977	35.5837	31.714	24.0044	22.6482	23.4314	25.4913	29.0677	29.2721	25.7506
	7	24.6081	29.0374	27.9916	25.762	25.8016	30.6319	28.4725	39.7428	42.9061	40.6821	27.4578	23.2571	23.7654	26.6223	33.4967	35.5111	32.4556
	8	21.6708	25.2593	23.6892	24.6902	27.2773	26.498	22.0915	36.1192	44.3971	42.9979	30.3882	24.1309	24.1463	27.8655	30.8381	31.7687	27.9804
	9	24.8551	28.351	27.3158	25.5813	28.5278	26.4588	16.4079	34.1525	38.528	40.5085	30.5053	26.0897	26.2597	28.4637	27.0427	27.3546	21.3441
	10	30.447	34.6161	34.3417	32.0223	34.5884	28.8758	17.8072	20.6474	27.8049	33.9937	33.217	32.013	28.1026	26.5789	24.8193	24.3623	18.9119
	11	29.0565	32.7938	33.8438	32.9894	35.243	33.6351	22.6175	20.1753	23.4315	32.1485	34.6546	33.6255	29.8017	24.0462	25.3285	25.68	18.9917
	12	14.6033	16.9592	20.1288	25.0784	33.8489	36.4936	28.5323	21.1751	21.6411	27.7822	32.1979	32.8882	29.5979	23.6948	26.7396	25.8431	19.7325
	13	10.57	15.1321	20.3959	25.6969	33.7971	37.7559	31.9162	20.7778	19.627	21.4358	23.9917	28.6345	27.5532	22.4797	22.4016	21.5626	16.7232
	14		17.0224	21.1321	24.2932	28.154	31.8699	30.4449	20.8629	17.7229	14.8303	15.4597	21.5964	21.9775	18.8044	14.3823	14.4364
	15			17.5686	16.8526	15.8922	20.5936	21.9162	18.7685	16.5569	12.5651	15.0441	17.6016	18.8639	14.616	9.78758
	16				8.07769	8.84891	11.1633	14.4741	15.2644	13.7928	11.062	14.372	16.0774	15.7184	12.7595
	17					5.97018	6.57455	9.23658	9.05368	9.61233	8.70974	12.0578	12.3707	11.3052
5	1					24.2762	27.1384	28.2447	29.8747	25.2008	22.3398	18.8633	16.1721	12.8772					5																		5
	2					31.8904	29.4399	30.0612	30.3415	29.4518	27.0021	25.7608	22.4261	17.7083	13.0088
	3			28.8674	37.9732	34.0114	25.0092	19.3909	21.6222	25.3687	24.1004	27.1332	27.1822	24.4706	19.453	13.8088
	4		25.2658	33.5325	40.8775	41.0785	33.9795	31.4943	26.7421	24.8852	22.1053	25.6312	28.1389	28.5055	25.4672	21.136	15.4298
	5	20.3398	25.7269	28.4324	32.6234	37.0339	40.4139	41.8157	37.37	33.9246	26.646	24.3495	26.0304	27.7063	28.7478	25.2402	22.2779	14.9298
	6	23.378	28.1582	25.711	23.8378	28.2958	37.4896	38.2105	37.2231	35.4116	31.7305	25.2467	24.1209	26.0065	28.6404	33.804	33.2757	29.3053
	7	24.0151	28.2257	25.8732	24.1715	24.4336	28.9548	27.7886	38.6914	40.7293	39.1394	27.1996	23.4158	24.0195	28.31	35.2517	38.6993	34.3156
	8	20.1027	23.9138	22.2875	23.8066	25.9813	25.2078	20.8383	36.2308	43.9202	39.47	28.5359	23.897	25.2527	28.7657	33.5423	33.3731	26.7336
	9	24.636	29.0478	27.8264	25.8241	27.5136	24.8706	17.106	34.7745	36.8125	38.8877	29.6234	27.3844	26.6783	28.4489	27.3503	26.9188	21.2553
	10	27.62	33.3226	33.262	31.8135	32.8994	29.2377	18.24	18.5589	23.8122	31.7367	32.1855	30.6724	26.594	25.9895	24.1021	22.9507	18.6075
	11	24.286	27.3471	28.9148	29.1971	32.9064	33.1102	23.4727	18.4317	21.2358	29.8523	33.5656	31.0994	26.2872	22.5658	25.5849	24.7203	19.5318
	12	11.8327	13.3238	16.3374	21.7753	31.9519	36.087	28.6714	19.627	19.7737	25.9674	29.0654	28.9682	27.3782	22.6874	25.2573	25.0311	19.3138
	13	9.32121	14.6714	19.7149	24.2531	31.0349	34.2651	30.5936	19.4427	18.2869	20.2551	22.734	26.1341	25.6792	21.2297	20.9139	19.4107	14.9558
	14		15.9514	19.9778	22.3924	25.36	26.3185	25.6032	18.66	17.1503	14.5374	14.9076	20.7641	21.6235	17.756	14.002	12.9335
	15			14.1836	13.2754	12.3453	15.528	17.6248	16.2435	15.782	12.4228	14.458	17.0385	18.8501	14.9018	9.62048
	16				7.586	7.672	9.42	12.4409	12.474	12.7255	10.67	13.7916	14.5486	14.6996	11.4389
	17					5.424	5.922	7.72946	8.03	9.134	8.222	10.832	10.5972	9.898
6	1					23.2298	25.691	26.0685	27.4662	23.9085	21.4254	17.1072	14.9912	12.5495					6																		6
	2					31.294	28.9318	29.0928	28.2328	27.1842	25.0579	23.5839	20.3217	15.8709	14.0263
	3			26.7808	38.8982	34.8211	27.0886	19.1018	19.4412	23.4097	23.0066	25.4234	24.9077	22.5689	18.1868	14.3873
	4		21.6145	31.8575	39.9644	40.9815	35.5477	32.0272	26.9617	23.8578	21.4432	23.9	25.5849	25.0044	23.2801	20.2838	15.9891
	5	17.0461	21.6574	25.0839	28.9469	35.8403	38.8385	40.4159	37.4133	34.1403	29.5231	24.0328	24.814	25.9435	26.6468	24.2166	21.5361	15.5164
	6	20.7193	23.0907	21.9894	20.4343	24.1809	34.234	36.1922	36.2463	36.0587	32.6555	24.896	24.1239	25.2123	28.7039	32.0747	32.0592	27.0991
	7	20.8271	24.2635	22.7226	20.4325	20.8915	23.7569	23.5938	35.5199	39.1596	38.9934	25.7699	21.2797	22.0873	27.4119	33.1369	37.1786	32.8206
	8	17.0215	19.97	19.0657	21.017	23.3654	21.8257	17.4867	32.2614	41.8268	38.0592	26.5943	20.3413	22.2283	25.214	29.7522	30.8684	27.0935
	9	19.9635	22.5496	23.859	22.9831	24.0299	21.463	14.7587	31.2608	34.3489	37.4079	27.7749	23.9605	22.3747	24.2372	23.181	23.2549	18.8639
	10	21.6959	26.978	29.0409	27.8617	28.7332	25.2537	16.4283	17.3778	21.3644	29.632	31.0087	29.2917	24.9011	23.5645	22.5923	21.2678	17.3488
	11	19.9684	24.6331	26.8797	26.3872	29.9348	29.7495	21.6653	17.8994	20.9002	29.1352	33.8264	31.2261	26.2695	20.741	24.4682	22.7458	17.1957
	12	10.1143	11.6798	14.4938	19.4822	29.1365	31.4836	26.0248	16.9711	17.9253	23.7563	28.7901	29.1239	26.1085	21.5954	24.5817	22.138	16.6117
	13	8.51446	13.0971	17.869	21.19	27.7305	30.1054	26.4221	15.6811	15.5688	17.0189	20.0249	23.4431	23.1298	19.4689	19.0529	17.8243	13.1157
	14		13.6302	17.0911	18.8912	21.2986	23.4918	22.1426	15.9508	14.82	13.626	13.5247	18.5806	19.2071	16.0679	12.8714	11.9068
	15			12.5764	11.5906	9.6728	13.2204	14.5235	13.7061	12.8607	11.1598	13.3035	16.6653	17.58	13.4315	9.66598
	16				6.64766	6.49695	7.97963	10.5918	10.8717	10.6127	9.9407	13.411	14.8041	14.1102	10.5082
	17					5.3442	5.45214	6.41752	6.65988	7.9389	7.57551	10.4356	10.2645	8.84774
7	1					23.0892	25.8025	27.4289	28.1576	25.2089	22.3147	19.1258	15.7598	13.4615					7																		7
	2					29.9734	29.5964	30.2773	28.7098	28.6354	27.0861	25.1706	21.7778	17.1535	14.1532
	3			28.7803	37.2283	33.1373	24.4691	18.7091	20.3159	24.589	23.8872	25.852	25.6458	23.65	19.9934	14.2954
	4		24.7916	34.0261	39.9775	39.3827	33.7162	30.5854	26.932	23.9647	22.6586	24.2104	26.2872	25.9564	24.7065	21.4398	15.5799
	5	20.6667	25.6068	26.9536	30.6512	35.6444	38.6916	39.8653	37.2854	34.1369	27.5642	23.8709	23.6587	25.6897	27.2303	24.5478	21.6827	14.5077
	6	22.057	25.656	24.8665	22.0756	24.4358	33.0611	35.6998	36.5975	35.2641	31.9172	23.1556	22.7969	23.787	28.3158	33.4132	33.9736	30.073
	7	21.8	25.6489	24.4958	22.3064	21.7933	24.4054	24.4045	35.5228	39.1284	39.6711	26.0869	21.4342	22.1678	28.6462	36.177	39.415	34.5112
	8	16.8358	20.2939	20.9834	22.2657	23.1649	22.1863	17.5162	32.2699	41.3846	39.7261	29.2244	20.5043	23.878	26.9803	31.6528	31.967	27.7086
	9	20.0084	23.0232	23.5521	22.1125	23.9331	21.4938	13.5899	30.915	34.3737	37.3178	29.5515	25.4129	25.1952	27.5237	24.9914	25.0667	20.3032
	10	22.5243	27.2802	28.9895	28.2215	28.7653	23.9855	14.929	16.5302	21.3942	30.366	31.5897	30.0799	26.8215	24.4534	22.5478	22.2393	18.5105
	11	20.0379	24.241	26.6884	27.0063	29.0386	28.7526	19.8089	17.217	20.8706	27.786	32.3074	30.1247	27.1768	20.4451	24.68	23.813	17.1572
	12	11.5073	14.0104	16.263	20.7185	29.0994	31.408	24.2752	16.4908	19.5714	24.7917	28.0872	29.2803	25.8457	20.6667	24.2342	23.25	16.5913
	13	10.3533	14.0207	17.9545	22.2516	28.5696	31.1571	26.3503	15.7926	15.6797	18.1097	19.6286	24.3168	23.7389	19.9733	19.5854	18.8958	13.885
	14		13.3963	17.2206	19.1759	22.0348	24.6584	22.764	15.4251	13.9388	12.9387	12.0967	19.1584	18.8562	15.9283	12.323	11.5864
	15			12.2245	11.638	10.5735	14.4294	15.3848	13.9878	12.6673	10.7327	12.2029	15.1546	16.1481	12.2766	8.28689
	16				6.6898	6.31224	8.12041	10.9939	10.6408	10.5347	9.29857	11.6571	12.9671	13.0165	9.98364
	17					5.40612	5.25918	6.91837	6.33673	7.65714	7.19018	9.38776	9.28221	9.10634
8	1					22.2972	25.4904	27.2403	27.7641	23.1274	20.4425	17.4957	15.5891	13.0459					8																		8
	2					30.0811	29.2041	29.3719	28.9489	27.4659	24.7066	23.537	20.5618	16.9107	13.6204
	3			29.6156	39.0068	34.0938	26.4416	18.8899	21.3883	23.685	23.7462	24.9338	25.0804	22.663	18.3115	13.8395
	4		23.8609	33.7083	40.6864	40.0545	34.9379	30.4715	25.1587	23.4206	23.2435	25.0542	26.2857	26.6827	24.2321	21.4432	15.3485
	5	19.645	24.7516	27.2442	31.1365	35.6681	38.7654	40.1207	37.1089	34.4966	28.7898	23.7626	25.1326	26.1875	27.477	24.8886	21.6061	14.4978
	6	20.9588	23.7548	23.5632	22.9298	26.4505	36.8574	37.7446	36.6253	36.2842	32.0447	24.2924	23.5111	26.0415	29.2232	33.6535	34.1429	29.3545
	7	20.3054	24.3613	23.7403	23.0835	24.783	28.5756	26.528	36.5693	41.0698	41.1425	25.6815	21.9013	23.5773	28.4707	35.0725	38.7528	33.0624
	8	16.1871	19.7006	20.1284	22.759	26.3425	24.3562	19.2012	33.5854	43.0346	40.3886	28.7961	21.1562	24.0848	26.5799	29.9307	31.1978	26.6477
	9	19.547	22.0979	23.2316	21.8971	25.334	24.2407	15.1899	31.6207	35.6554	38.9177	29.7167	25.5413	25.6928	26.1137	23.3262	23.3305	20.1709
	10	21.7271	26.0352	26.9594	27.0607	29.9851	26.8201	16.7535	17.6929	22.7799	31.7026	32.0552	29.8065	26.7919	23.4093	21.2537	21.1019	18.0996
	11	19.4042	23.5229	25.0104	25.4526	30.7728	30.8489	22.9511	16.7854	21.8254	30.2069	33.2928	30.4351	26.1069	20.0148	22.408	21.2516	16.5052
	12	10.8219	12.2769	15.4493	20.3862	29.5495	33.0882	27.5297	17.6544	19.6543	24.7065	28.5584	29.2955	26.1456	19.5157	22.2542	21.5567	15.4401
	13	8.77914	15.3258	19.7909	23.2667	29.2526	32.2928	28.602	16.3176	17.0205	18.2133	19.9854	23.2041	22.5899	17.905	17.6826	16.3333	12.1906
	14		15.0123	19.1109	21.317	23.1534	24.9565	23.4525	15.7295	14.9426	12.3018	12.5337	18.1247	18.7193	15.1049	10.3566	9.87705
	15			13.1585	11.723	11.0204	14.2037	15.2357	14.6171	13.3075	10.7337	12.435	14.9321	16.3106	12.3893	7.63599
	16				7.0998	7.05703	8.69592	11.2331	11.2648	10.6118	9.06707	12.0203	12.8595	12.6099	10.055
	17					5.41752	5.40122	6.98574	7.20935	7.93089	7.36992	9.45528	8.97143	8.23469
9	1					22.1568	25.4779	26.3546	26.8114	23.9066	21.9414	18.4026	15.6157	11.8114					9																		9
	2					28.6696	27.6182	27.576	27.8204	27.0131	25.0214	23.3996	21.1332	15.9278	12.2888
	3			28.1793	37.4083	32.6156	24.7064	18.0661	19.7088	22.3231	22.4913	25.7645	24.6026	22.3843	18.3961	13.8206
	4		22.8494	32.4223	40.184	39.016	34.8793	31.0544	25.167	23.9024	22.1015	24.5621	26.2835	25.9121	24.7991	20.3348	16.369
	5	18.9253	23.094	25.1695	29.406	34.9639	39.4179	38.9203	34.8896	31.5942	27.7102	23.9426	25.2719	25.9059	27.0943	25.2341	22.367	15.3333
	6	20.3254	23.2532	21.6333	20.1866	23.7689	33.5657	35.2639	33.2516	32.2767	30.3616	24.8533	23.8811	25.1223	28.2661	32.9018	32.4388	28.4686
	7	19.1532	22.9043	21.2293	20.0552	20.5136	24.5535	24.7093	35.8122	38.9639	38.5667	25.719	22.0218	22.2232	28.0266	35.608	37.5278	32.0432
	8	15.9449	18.7595	18.295	20.3201	21.7899	21.54	18.5333	33.9754	42.2022	39.6206	27.4792	20.2919	21.7544	26.2115	30.5379	32.5702	27.6468
	9	19.2881	21.0532	21.8084	20.0665	22.6358	20.9668	14.2263	31.2389	35.0844	37.705	28.985	23.8865	23.6324	25.9484	24.4163	25.2965	21.9704
	10	21.7606	25.8587	26.8408	26.3229	27.0169	24.0293	15.5112	16.624	22.841	31.1123	31.1401	27.5646	24.6638	23.518	23.1398	23.2866	17.9477
	11	19.5073	23.5397	25.1765	24.2733	28.8426	27.9281	20.4794	16.7975	20.2213	28.4395	31.6963	29.6285	24.903	20.7542	24.3835	23.4013	17.395
	12	10.8831	12.7975	14.7484	18.8029	28.6282	30.8021	24.8133	16.4504	18.9754	23.6117	26.9957	27.7414	25.3581	20.1933	23.7367	22.1069	15.869
	13	8.81649	13.3052	16.7143	20.2911	26.9875	29.4004	25.1735	15.2819	15.5808	17.1292	19.0104	23.3472	22.2306	17.6446	18.4244	17.0911	12.6796
	14		13.072	16.2074	17.7286	19.5726	22.0123	20.5082	15.0613	14.1714	12.5741	12.1127	17.8131	17.1157	13.7146	10.5225	10.3996
	15			11.1039	9.78004	8.55102	11.6667	13.6557	13.0653	13.0716	11.1449	11.9591	14.3498	15.3244	11.0552	7.27403
	16				6.2449	5.92668	7.34012	9.47444	9.80652	10.2843	9.42974	11.1047	12.323	12.0926	9.05714
	17					5.10387	5.41141	6.27812	6.32994	7.55193	7.35438	8.83265	8.50924	8.07771
10	1					22.666	26.0846	27.9406	28.3724	23.3227	19.6674	17.487	14.671	12.6993					10																		10
	2					29.4527	28.5578	29.8456	29.0826	27.6891	24.6085	22.1917	20.4447	16.6161	12.9395
	3			26.535	37.6712	33.7433	25.9552	21.6987	21.9844	24.5991	23.7749	25.0996	23.613	22.2039	18.3918	13.0842
	4		23.2697	31.9048	39.1438	40.0315	34.5461	33.2031	29.4368	27.8044	23.9413	24.1145	25.8657	24.6302	22.4664	19.0391	15.1518
	5	20.2413	23.1205	25.4327	30.5073	34.6457	38.1009	39.9689	37.44	36.792	32.163	26.7768	26.5011	26.0347	25.2549	22.8522	19.7538	13.6565
	6	21.944	24.2542	21.5031	20.6577	24.4029	32.9207	35.7447	36.2295	36.0966	33.9955	28.071	27.2141	27.1952	28.2681	32.512	30.8584	26.3406
	7	21.1197	23.7104	20.8954	20.3208	21.3278	25.0478	24.8737	36.1845	39.0761	39.7329	28.4703	24.8384	25.5358	29.8935	35.1429	36.7696	31.0443
	8	17.1268	18.4104	17.4148	19.5835	21.815	21.6128	20.0082	33.5196	41.4733	39.8056	30.1663	22.9936	23.7646	27.4914	30.7251	31.6659	25.1931
	9	18.0042	20.9582	20.361	21.2557	22.7002	21.8406	15.0508	31.5132	34.7019	37.5782	30.1991	26.086	23.903	25.9662	22.5329	23.1159	19.3721
	10	21.1837	25	26.6211	26.8667	28.1958	24.6619	15.6082	17.217	21.0587	30.9571	31.8248	28.485	24.9302	21.9979	20.4325	20.3248	16.4969
	11	17.896	22.0919	24.0624	24.9057	28.8431	29.1822	20.6319	16.6306	20.0327	29.1534	33.0596	29.9402	24.7552	19.2104	21.914	20.2782	15.0231
	12	11.5898	13.1288	15.5361	20.3672	28.5292	31.105	23.8033	15.4449	17.3599	22.5649	26.673	27.8195	24.4708	20.2893	21.4205	20.5021	14.7006
	13	9.55533	14.0965	17.6082	20.6529	26.4886	29.2463	24.0164	14.002	14.7963	16.5185	18.3485	22.3959	20.8539	18.1049	18.0186	17.0269	12.5905
	14		12.5635	16.0757	18.2249	19.5808	20.6687	18.8735	13.6578	13.9409	12.4805	12.8801	17.1807	16.6398	13.0575	10.2608	10.1434
	15			10.3245	9.17959	7.80855	10.6456	11.8694	11.446	11.9695	10.8004	12.4361	14.3789	14.8492	10.7894	7.74286
	16				6.16735	5.09796	6.07128	7.90631	8.28106	8.87373	8.87169	11.0594	12.3668	11.729	8.50308
	17					4.81224	4.83503	5.2444	4.98982	6.37067	6.82485	8.56008	8.05317	7.9816

## Sheet: BT
NumberOfStartingPointsBT
Signals of insufficient quality were excluded from the property maps. Signals could be rejected based on noise low amplitude, large artefact or ventricluar farfields that could not be substracted. Breaktrough can only be identified if a contiguous circle of electrodes enclose the electrode of interest. Therefore electrodes at the border or around a missing electrodes are excluded.
	1	1	2	3	4	5	6	7	8	9	10	11	12	13	14	15	16	17
1	2																		1																		1
	3						11	4	3	9	8	5	9
	4						12	11	3	9	6	15	6	9
	5				16	9	14	17	10	2	8	13	13	3	8
	6			55	17	13	18	7	9	18	6	14	12	14	12	8
	7		17	20	44	47	18	26	21	16	44	12	4	6	15	18	18
	8		28	28	35	61	22	62	46	74	18	8	7	6	6	14	20
	9		21	27	31	16	18	39	10	44	18	10	11	20	9	11	14
	10		5	13	38	23	18	21	1	20	17	37	8	17	35	14	15
	11		16	26	17	35	6	4	3	9	17	52	7	21	13	16	5
	12		10	10	4	5	20	17	15	5	12	20	15	9	23	22	5
	13		17	5	3	3	50	23	7	4	7	9	19	18	39	22	9
	14			1	4	6	9	21	10	9	5	20	13	21	29	15
	15				9	4	7	5	19	7	7	12	21	12	3
	16					3	5	7	8	4	10	3	5	7
	17						2	4	8	4	4	4	3
	1
2	2																		2																		2
	3						11	3	2	8	7	3	13
	4						7	12	3	14	7	15	5	4
	5				27	16	14	12	10	4	4	17	9	2	7
	6			47	5	16	18	11	8	18	9	6	15	12	12	12
	7		18	18	32	58	18	13	20	20	28	13	3	6	11	11	15
	8		18	26	34	64	18	42	24	57	10	12	4	5	4	11	8
	9		20	33	28	12	22	47	10	44	15	8	15	26	8	7	8
	10		6	9	30	19	8	21	3	30	10	27	10	17	35	13	13
	11		14	18	12	26	6	6	4	5	17	50	8	15	12	15	9
	12		3	6	4	5	29	13	6	4	10	8	13	17	15	11	4
	13		9	2	4	7	59	25	2	6	5	11	15	23	32	23	6
	14			2	1	2	6	21	0	5	6	10	10	18	26	14
	15				6	0	7	8	7	6	1	5	30	17	4
	16					3	1	4	9	3	6	3	4	5
	17						2	2	14	1	0	0	3
	1
3	2																		3																		3
	3						12	5	7	6	15	11	8
	4						3	9	4	10	6	14	5	9
	5				16	16	13	13	8	3	9	7	12	7	2
	6			67	6	16	19	9	6	17	11	9	13	17	17	11
	7		20	16	29	60	33	27	30	16	34	17	7	9	24	10	11
	8		26	34	38	63	22	38	26	57	13	10	3	6	5	13	14
	9		23	37	35	20	23	63	8	56	11	14	20	16	7	8	13
	10		7	8	30	29	10	14	3	16	16	36	13	13	22	13	9
	11		18	32	27	33	14	8	7	15	16	48	7	25	17	28	8
	12		6	13	1	12	42	20	11	7	9	15	20	17	17	9	5
	13		10	4	4	15	51	39	8	7	8	14	19	28	36	16	11
	14			2	6	16	14	29	13	6	4	15	14	13	22	11
	15				10	7	10	12	9	10	7	10	31	21	8
	16					6	3	4	7	6	15	2	4	8
	17						4	3	14	2	4	5	5
	1
4	2																		4																		4
	3						17	1	4	10	5	3	10
	4						8	9	4	20	5	9	2	4
	5				23	19	12	10	22	5	7	15	14	3	6
	6			47	13	16	11	20	10	18	8	5	20	19	9	9
	7		17	18	27	44	24	42	25	17	20	9	2	11	10	23	13
	8		34	51	48	74	27	54	50	84	13	16	5	7	6	8	17
	9		29	34	41	30	24	40	11	54	25	9	22	21	15	11	16
	10		14	15	20	24	12	15	5	21	22	28	11	17	26	13	14
	11		20	30	25	39	13	5	7	14	28	66	11	24	16	26	8
	12		5	12	7	6	43	21	16	4	12	28	18	20	25	15	2
	13		24	4	5	9	65	45	5	8	9	12	17	32	25	23	4
	14			2	8	7	14	32	14	8	5	17	14	11	20	9
	15				9	11	18	13	4	11	2	5	10	10	6
	16					4	2	6	6	3	12	3	5	8
	17						5	0	18	1	2	3	2
	1
5	2																		5																		5
	3						9	7	9	8	7	9	11
	4						8	5	7	11	5	7	3	3
	5				20	20	14	11	31	5	9	12	19	9	10
	6			55	14	17	16	17	14	17	9	14	12	16	19	18
	7		14	15	31	61	29	30	24	23	25	16	10	9	17	17	18
	8		32	43	30	57	27	51	37	53	14	10	12	6	3	13	9
	9		22	32	27	30	24	43	8	48	22	14	15	26	15	13	14
	10		8	9	23	35	7	13	7	23	17	30	8	19	38	14	8
	11		24	26	28	39	10	7	6	13	21	46	17	22	12	24	3
	12		5	23	9	8	31	15	14	4	14	14	15	16	24	11	3
	13		19	6	7	14	46	26	10	13	6	11	18	26	40	25	13
	14			3	10	10	4	14	7	9	4	19	12	12	20	15
	15				15	4	10	4	8	9	6	9	21	16	6
	16					3	5	8	8	4	7	2	5	7
	17						2	6	8	4	2	4	5
	1
6	2																		6																		6
	3						10	7	5	11	7	5	15
	4						12	4	3	14	11	14	1	2
	5				20	26	15	12	25	4	10	22	12	0	8
	6			46	6	12	16	22	7	27	11	11	13	14	11	8
	7		21	14	33	74	31	37	24	27	39	13	4	10	12	14	13
	8		22	36	45	55	30	73	35	47	12	11	8	10	6	18	7
	9		18	37	33	23	23	50	7	60	16	7	22	26	11	6	19
	10		8	8	25	19	11	12	4	15	17	30	7	22	49	12	8
	11		15	26	22	28	12	5	5	9	23	51	4	26	14	18	9
	12		10	3	3	6	43	17	4	7	8	23	25	22	21	16	4
	13		9	5	3	5	31	21	4	15	6	14	18	13	24	22	10
	14			2	2	9	9	20	6	3	4	10	12	14	17	10
	15				9	6	2	2	5	3	5	11	28	14	3
	16					2	2	4	9	3	5	2	3	8
	17						3	4	6	3	2	2	1
	1
7	2																		7																		7
	3						13	5	5	6	7	8	12
	4						7	8	2	8	4	10	4	10
	5				20	17	12	7	15	0	8	13	19	5	2
	6			48	4	18	11	15	9	32	11	8	13	14	17	23
	7		20	19	20	69	32	34	26	20	42	13	5	9	15	25	19
	8		28	51	37	52	25	54	30	42	10	8	7	6	5	17	11
	9		21	31	30	17	24	61	10	51	13	14	16	19	13	9	9
	10		11	8	29	24	12	14	5	24	13	32	15	14	46	13	11
	11		17	29	32	27	10	6	8	12	16	35	13	22	14	19	6
	12		6	11	4	8	55	11	7	7	10	12	21	17	18	18	6
	13		10	4	6	12	49	19	4	6	11	14	22	31	42	35	12
	14			3	6	8	6	16	7	4	3	12	18	22	22	21
	15				8	5	9	7	5	3	1	7	24	18	8
	16					3	2	3	7	4	4	1	4	2
	17						1	2	12	2	3	2	2
	1
8	2																		8																		8
	3						10	5	5	10	10	4	12
	4						10	8	2	2	8	14	3	7
	5				13	16	8	7	18	1	5	12	14	8	5
	6			60	9	9	13	15	8	20	5	14	14	18	14	13
	7		11	10	35	76	31	40	34	33	28	10	6	18	16	14	10
	8		33	27	33	44	31	51	32	51	9	7	14	8	6	16	10
	9		29	44	28	23	23	42	10	63	15	8	23	26	9	8	14
	10		8	10	22	35	8	8	5	19	11	20	8	17	31	11	7
	11		14	23	30	25	5	7	9	7	18	42	15	22	20	21	6
	12		4	14	4	5	44	14	20	6	12	14	17	15	19	9	10
	13		11	5	6	12	31	34	2	6	9	17	14	19	23	27	6
	14			1	7	10	9	15	6	3	3	24	17	17	18	11
	15				11	4	10	6	15	9	4	10	16	16	8
	16					1	6	1	4	6	6	1	2	6
	17						2	4	7	2	3	1	1
	1
9	2																		9																		9
	3						6	6	3	6	8	7	18
	4						4	6	5	7	6	15	4	3
	5				22	19	12	8	20	3	5	12	11	3	6
	6			49	6	12	12	15	9	33	9	10	16	15	11	2
	7		20	23	32	89	40	33	35	31	33	21	4	9	17	16	16
	8		22	39	31	47	30	35	20	63	14	6	6	7	5	10	7
	9		20	37	25	20	21	33	10	51	19	9	18	22	17	12	15
	10		7	5	31	28	6	10	5	20	18	32	4	15	31	14	10
	11		10	20	23	23	13	7	4	4	14	41	10	22	11	27	10
	12		11	12	3	2	31	11	13	3	10	11	17	27	11	19	4
	13		12	3	8	5	24	19	5	8	6	10	11	32	31	27	8
	14			2	6	10	4	22	0	3	2	15	13	21	16	10
	15				9	3	10	5	6	10	3	8	16	14	6
	16					2	3	2	6	3	4	3	2	3
	17						5	5	6	0	4	3	1
	1
10	2																		10																		10
	3						10	4	6	3	6	6	12
	4						4	7	4	11	5	7	3	5
	5				22	16	16	9	15	3	12	11	14	5	4
	6			46	9	18	12	13	10	16	13	5	13	16	15	10
	7		10	13	27	83	39	34	35	46	42	14	6	17	21	15	10
	8		25	32	47	26	28	45	22	49	5	17	10	8	6	12	8
	9		11	41	23	23	25	38	18	52	14	14	27	20	9	10	13
	10		13	6	11	34	5	15	2	14	13	34	7	17	35	12	10
	11		4	27	20	28	11	9	10	20	19	43	7	23	8	19	2
	12		4	7	3	11	42	14	13	8	6	11	18	21	13	11	5
	13		11	3	3	5	29	26	2	5	7	11	23	28	27	23	6
	14			1	6	4	3	5	8	7	4	22	19	15	15	6
	15				5	3	2	1	9	4	4	7	19	16	3
	16					0	0	2	7	3	2	2	2	4
	17						0	4	12	0	2	2	2

## Sheet: FI
FractionationIndices
Signals of insufficient quality were excluded from the property maps. Signals could be rejected based on noise low amplitude, large artefacts or ventricluar farfields that could not be substracted. Fractionation index is particularly sensitive to noise. Therefore electrodes with substantial noise are more strictly excluded.
		1	2	3	4	5	6	7	8	9	10	11	12	13	14	15	16	17
1	1					1.34591	1.58017	1.36383	0.884696	0.93177	1.35449	1.09692	1.12115	1.81678					1																		1
	2					1.95937	1.40227	1.09112	1.18792	1.17517	0.797414	1.15859	0.384106	0.671082	0.484513
	3			2.75744	3.89977	2.91324	1.9726	0.648526	0.686364	0.416481	0.940265	0.541935	1.21192	0.352423	0.695364	0.355408
	4		2.60045	3.23362	3.23288	3.3977	2.47836	1.25513	0.956818	0.521253	0.482222	1.00221	0.850972	1.55876	0.593819	0.683628	0.720264
	5	2.5022	2.26782	1.41102	2.31692	2.54923	2.49558	3.74603	2.89485	2.02004	0.841871	0.879733	1.32456	1.28761	1.70288	1.0287	1.07522	1.89135
	6	1.94518	2.13978	2.79095	2.70513	2.4661	3.11677	3.0766	1.29114	2.52928	3.00667	1.77162	1.90929	1.74779	2.11804	2.60398	2.21192	2.53437
	7	2.19783	1.6056	2.53205	2.51288	2.09895	2.35294	1.95407	2.45073	2.4334	2.97351	0.92	0.947137	1.0022	1.81498	2.8058	3.9955	3.59775
	8	1.50753	1.67811	2.12924	2.69002	2.4034	2.22245	0.953061	0.960744	4.2069	2.99781	1.55361	0.637744	0.773128	1.14254	1.7947	2.11973	2.60586
	9	1.69492	1.82452	2.25934	2.72385	3.12474	1.82099	0.178138	0.622718	2.38771	2.72885	2.38661	1.08061	1.52088	1.27586	1.17773	0.963043	1.60435
	10	1.21702		2.28085	1.56513	2.83439	2.40909	0.249493	0.359756	2.075	2.83512	2.51948	2.31304	1.74565	1.1308	1.08639	0.86087	0.985138
	11	0.863158	0.72479	1.09684	1.18896	2.14224	2.27463	0.920245	0.63286	1.77433	2.40717	3.34483	3.11894	1.59023	1.84842	1.64119	1.60042	1.16211
	12	0.732919	0.362319	0.585921	1.05684	1.68076	2.13646	1.83368	1.58896	1.25567	1.64286	3.10707	3.30519	2.18697	1.77197	2.43633	2.16632	1.66388
	13	0.750511	0.418891	0.552795	0.977035	1.86624	2.90086	1.53955	1.54713	0.776639	1.03138	1.47689	1.51471	2.83439	0.958678	1.6405	2.06681	0.537678
	14		1.07975	1.24435	0.963265	0.596349	1.56879	1.48971	1.38351	0.686354	0.732106	0.347023	0.201629	2.15304	0.527607	0.838115	0.709611
	15			0.832323	0.423387	0.260606	0.313765	1.04684	0.985859	0.760649	0.638211	0.147177	0.383984	1.80585	0.26626	0.255578
	16				0.230303	0.109312	0.10101	0.630303	0.696356	0.807692	0.640404	0.489919	0.739754	0.893443	0.421589
	17					0.109312	0.143434	0.307071	0.319838	0.426263	0.450505	0.40202	0.441296	0.400407
2	1					1.19403	1.38013	1.19612	0.860759	1.03419	1.33187	1.32743	1.28222	2.04018					2																		2
	2					1.84211	1.2933	0.886836	0.986333	1.34452	1.01499	1.11429	0.393333	0.705357	0.349666
	3			2.56019	3.71226	2.70208	1.8894	0.53211	0.646789	0.510067	1.20667	0.784783	1.21681	0.334812	0.686667	0.3
	4		2.13927	2.99097	3.04167	3.09091	2.2	1.08716	1.00229	0.591518	0.542222	1.21586	0.993478	1.6181	0.519912	0.737778	0.56
	5	2.36099	1.95011	1.16017	2.26915	2.35698	2.59551	3.47917	2.88128	1.84685	0.797327	0.815965	1.30531	1.45455	1.56984	1.04213	1.18444	1.74497
	6	1.85588	1.86245	2.50866	2.42702	2.31034	2.92688	3.01739	1.29724	2.56763	2.50114	1.41176	1.59865	1.79601	2.03548	2.57175	2.04688	2.70379
	7	1.66157	1.4413	2.48026	2.45077	1.72318	2.2334	2.03983	2.36364	2.42398	2.75455	0.84009	1.01577	1.03341	1.84855	2.52135	3.88684	3.6082
	8	1.15317	1.33693	1.94926	2.46667	2.25806	1.82143	0.829918	0.892116	4.15604	2.89978	1.55257	0.70989	0.68071	1.0692	1.45103	1.81696	2.92841
	9	1.34341	1.57569	2.15612	2.51797	2.92208	1.49896	0.242363	0.569672	2.01489	2.46087	2.38293	1.13938	1.30444	1.18102	1.01104	0.72949	1.41319
	10	0.913978		1.75054	1.33761	2.44397	2.03602	0.240816	0.300203	1.79237	2.50989	2.44592	2.12027	1.73789	1.04536	1.1	0.684211	1.02155
	11	0.666667	0.706638	1.20996	1.11597	1.92982	1.87872	0.73251	0.641393	1.4958	2.19048	3.23385	3.07761	1.48498	1.54915	1.49024	1.3319	1.04077
	12	0.673684	0.451477	0.628692	1.10021	1.64052	1.78166	1.5166	1.41564	1	1.7094	3.13755	3.15859	2.04077	1.60381	2.29221	1.79614	1.37764
	13	0.620042	0.301255	0.390756	0.860465	1.56867	2.5859	1.33471	1.38254	0.703093	1.23061	1.53928	1.46908	2.83991	0.874477	1.44703	1.70763	0.509434
	14		0.872651	1.11691	0.939203	0.65272	1.58228	1.38958	1.27216	0.587629	0.916493	0.263048	0.15528	2.16737	0.545833	0.807933	0.575
	15			0.813665	0.372428	0.18595	0.221074	1.16667	0.940329	0.721649	0.634096	0.135802	0.340956	1.62605	0.269151	0.27686
	16				0.187243	0.0802469	0.131959	0.734021	0.654321	0.704545	0.615226	0.368313	0.726514	0.745263	0.339506
	17					0.0864198	0.131417	0.252567	0.234086	0.374486	0.4846	0.425926	0.378099	0.372671
3	1					1.34947	1.54412	1.38478	0.951983	0.889126	1.17181	1.10889	1.1663	1.75778					3																		3
	2					1.91723	1.54853	1.12925	1.08463	1.25771	0.965591	1.11648	0.421286	0.646018	0.361233
	3			2.63535	3.66441	2.64773	1.84545	0.680995	0.716216	0.388521	0.995575	0.667377	1.19248	0.318584	0.643016	0.277533
	4		2.61623	3.29194	3.36142	3.18636	2.43607	1.23756	1.00676	0.490022	0.517621	1.07489	0.868534	1.60089	0.519912	0.596882	0.544053
	5	2.63557	2.27521	1.51033	2.43579	2.42949	2.6105	3.48198	2.85301	2.18	1.01556	0.9117	1.50442	1.47588	1.6408	1.05973	0.975664	1.67184
	6	1.70241	1.94526	2.69409	2.64706	2.50622	3.07484	3.28723	1.44979	2.49241	2.84106	1.86031	2.07539	1.75055	2.07726	2.48552	2.34076	2.5177
	7	2.28139	1.57263	2.64927	2.66596	2.11777	2.4472	2.02049	2.48233	2.62737	2.94481	1.12583	1.09211	1.04376	1.88326	2.63474	3.97982	3.81038
	8	1.62924	1.88075	2.24948	2.80785	2.51464	2.08998	0.885772	1.03055	3.74627	3.05628	1.61707	0.613043	0.730263	1.17763	1.70241	2.02609	2.80617
	9	1.77778	1.84647	2.29607	2.7963	3.26722	2.04675	0.265469	0.526104	2.16356	2.49894	2.16415	1.16522	1.45695	1.17597	1.13859	0.839056	1.53319
	10	1.19038		2.27158	1.3875	2.78361	2.52588	0.398	0.407186	1.87321	2.52854	2.5914	2.15152	1.7149	1.10105	0.953684	0.901075	0.955882
	11	0.76618	0.645094	1.06237	1.11134	1.93843	2.31393	1.14	0.836327	1.72323	2.30992	3.40385	3.32903	1.56809	1.81723	1.58051	1.53277	1.12395
	12	0.683778	0.344898	0.526749	1.09129	1.69684	2.27991	2.04684	1.68548	1.18548	1.65432	3.12447	3.46237	2.24576	1.69937	2.43697	2.08386	1.39875
	13	0.70122	0.402041	0.506173	0.958932	1.67573	2.84255	1.61616	1.55668	0.843058	1.14519	1.40496	1.44628	2.97877	1.04348	1.67909	1.68107	0.508197
	14		1.0061	1.21429	0.926829	0.59798	1.49091	1.51012	1.40726	0.866126	0.744422	0.348269	0.20284	2.34947	0.598778	0.881633	0.512146
	15			0.871227	0.538306	0.275654	0.354125	1.20404	0.96988	0.870445	0.68357	0.211268	0.45082	1.71429	0.346856	0.30101
	16				0.236948	0.0661323	0.100402	0.61245	0.712274	0.859719	0.641851	0.476861	0.836777	0.903689	0.458586
	17					0.116232	0.192385	0.300601	0.292585	0.482966	0.5	0.408451	0.47379	0.381048
4	1					1.25523	1.33898	1.29536	0.883817	0.84322	1.30586	1.22198	1.21319	1.81236					4																		4
	2					2	1.34014	1.06532	1.64967	1.43046	0.891258	1.03254	0.458333	0.61674	0.376652
	3			2.63596	3.8491	2.65148	1.85941	0.557047	0.734831	0.524123	0.991228	0.621277	1.12121	0.331868	0.568282	0.297357
	4		2.74505	3.3913	3.36689	3.29932	2.26471	1.15766	0.92809	0.497807	0.482456	0.80744	0.667382	1.43202	0.413187	0.640969	0.472527
	5	2.63319	2.463	1.53623	2.26722	2.46835	2.33188	3.57684	3.04415	2.10841	1.00883	0.923246	1.12227	1.12581	1.58079	0.791209	0.817181	1.55824
	6	1.93261	2.10669	2.88679	2.66528	2.58316	3.38669	3.26514	1.31185	2.44635	2.92461	1.95796	1.81195	1.54031	1.90611	2.37118	1.86283	2.35762
	7	2.32762	1.76923	2.88935	2.75992	2.21881	3.04703	2.41344	2.88683	2.79958	2.94481	1.34444	1.04835	1.00877	1.84716	2.56209	3.57333	3.83556
	8	1.81042	2.07819	2.58078	2.97921	2.58193	2.4919	1.2326	1.26061	3.46008	3.30983	1.78728	0.66309	0.777293	1	1.84902	1.92731	2.84783
	9	1.86128	1.97143	2.52429	3.07724	3.58351	2.06036	0.287129	0.69505	2.6294	2.91064	2.24094	1.00214	1.32468	1.18376	1.13462	0.88535	1.64946
	10	1.33888		2.58125	1.7166	2.96258	2.49491	0.373757	0.501992	2.44353	3.05074	2.57234	2.2203	1.57265	1.14737	1.02521	0.997881	0.867925
	11	0.958159	1.01667	1.38125	1.49894	2.14624	2.38557	1.12151	0.998008	2.01227	2.57531	3.54158	3.42208	1.54008	1.84454	1.81497	1.41263	1.09336
	12	0.91002	0.436735	0.676892	1.21237	1.81489	2.20551	2.11492	1.85312	1.35282	1.91494	3.3	3.29536	2.35158	1.77732	2.53958	2.22803	1.50617
	13	0.803644	0.434959	0.573469	1.07423	1.84519	3.02998	1.68862	1.78182	0.905242	1.12016	1.6722	1.67146	3.23382	0.963415	1.7418	2.1807	0.49899
	14		1.03055	1.32114	1.07831	0.738	1.71545	1.6994	1.5625	0.781124	0.757576	0.306452	0.190763	2.30328	0.518145	0.869215	0.531313
	15			0.982107	0.565737	0.307385	0.505976	1.35729	1.01796	0.816367	0.667335	0.178357	0.398374	1.83505	0.274	0.248497
	16				0.266932	0.121272	0.161355	0.802789	0.735586	0.920319	0.652	0.476	0.832994	0.987755	0.468938
	17					0.166998	0.220676	0.377734	0.298211	0.461233	0.522863	0.454183	0.448898	0.427711
5	1					1.10856	1.22594	1.18987	0.870833	0.97463	1.30108	1.14967	1.10458	1.81798					5																		5
	2					1.87696	1.34694	1.21315	1.41071	1.50439	0.877378	1.10776	0.486957	0.611842	0.390351
	3			2.43371	3.82327	2.89041	1.77117	0.536364	0.746606	0.459161	1.15066	0.708245	1.12581	0.400871	0.47046	0.263736
	4		2.65142	3.16234	3.25383	3.32287	2.42955	1.24717	0.959276	0.600442	0.640351	1.14317	0.995726	1.65208	0.659389	0.539474	0.513158
	5	2.54762	2.39076	1.39501	2.41213	2.36229	2.73638	3.6809	3.03084	2.11752	0.993363	0.98022	1.50652	1.53348	1.6864	1.04585	0.949672	1.63158
	6	1.8013	2.30802	2.80169	2.71933	2.62083	3.125	3.28211	1.5186	2.63793	2.90423	1.91556	2.08791	1.93246	2.11184	2.5815	2.49891	2.55973
	7	2.32974	1.71097	2.65751	2.53138	2.31535	2.88296	2.02846	2.48148	2.74793	2.98673	1.09756	1.10503	1.13203	1.93886	2.95806	4.08656	3.94222
	8	1.62264	1.90965	2.2731	2.85597	2.77386	2.2284	0.822355	1.13968	3.62815	3.12876	1.89978	0.821888	0.895425	1.23644	1.77657	1.94794	2.67249
	9	1.85774	1.93347	2.35537	2.90798	3.53862	2.09651	0.208	0.518962	2.36042	2.79237	2.45319	1.15551	1.5558	1.16383	1.22505	0.938034	1.45319
	10	1.14405		2.35551	1.56967	2.75681	2.41189	0.392	0.427146	1.99796	2.81316	2.70149	2.18103	1.53632	1.40671	0.95	1.0621	0.931106
	11	0.718107	0.640496	0.954262	1.15933	1.87234	2.37214	1.35152	1	1.89431	2.48101	3.33978	3.08639	1.39623	1.97077	1.88889	1.35073	1.23409
	12	0.77551	0.439919	0.703476	1.25773	1.83473	2.26327	2.0568	1.77823	1.27475	1.74134	3.16245	3.18008	2.20588	1.5942	2.37238	2.10145	1.35425
	13	0.779798	0.472617	0.720978	1.21224	1.70226	2.90188	1.50101	1.58551	0.785859	1.19592	1.32371	0.981707	2.73333	0.682927	1.61066	1.72485	0.349398
	14		1.11943	1.30909	0.742455	0.432	1.02823	1.52024	1.38431	0.805611	0.844444	0.242972	0.27621	2.34979	0.360887	0.68357	0.41129
	15			0.760479	0.45509	0.245509	0.316	1.08583	0.974104	0.888	0.693387	0.224	0.534413	1.66324	0.240481	0.182731
	16				0.242	0.1	0.162	0.591182	0.698	0.803607	0.65	0.537074	0.629555	0.800403	0.374749
	17					0.156	0.254	0.39479	0.3	0.4	0.43	0.412	0.567134	0.316
6	1					1.13025	1.35837	1.33405	0.964211	0.961702	1.43421	1.11816	1.17287	1.87912					6																		6
	2					1.84855	1.45227	1.08824	1.102	1.37281	0.918455	1.15033	0.404814	0.682713	0.444201
	3			2.3132	3.73756	2.76835	1.69318	0.590498	0.730769	0.411894	1.04376	0.657447	1.26374	0.350109	0.621978	0.330416
	4		2.39207	2.94298	3.02889	3.10185	2.22273	1.29025	1.05631	0.62	0.606987	1.17609	0.980645	1.6468	0.606127	0.598253	0.739606
	5	2.43326	2.07066	1.19916	2.06157	2.14661	2.68363	3.77727	3.18667	2.26281	1.08352	1.03501	1.50328	1.50435	1.77704	0.978118	1.17505	1.89716
	6	1.77412	2.13391	2.41826	2.29661	2.10851	2.66596	2.95896	1.28632	2.64565	2.81432	1.82965	1.84956	1.76368	2.17325	2.64396	2.33333	2.5
	7	1.92341	1.2311	2.15484	2.23126	2.03404	2.30655	1.78125	2.09644	2.37447	2.44371	0.988938	0.88326	0.89738	1.79515	2.63576	3.91295	3.74888
	8	1.16559	1.40043	1.68008	2.33191	2.44444	1.861	0.613963	0.844398	3.88745	2.85088	1.64474	0.778261	0.88913	1.1179	1.35526	1.80044	2.55234
	9	1.47854	1.57112	1.99786	2.48837	2.81624	1.77801	0.218814	0.494867	2.20851	2.61184	2.30303	1.25439	1.41176	0.910256	1.1875	0.760349	1.53996
	10	0.905782		2	1.27872	2.25813	2.10994	0.422131	0.418891	1.81568	2.72511	2.75381	2.25	1.43871	1.26427	0.776824	1.0216	0.807611
	11	0.610526	0.48218	0.852321	1.03404	1.67391	1.88323	1.21561	0.983573	1.70478	2.397	3.53407	3.09348	1.22316	1.72611	1.79237	1.32203	1.19149
	12	0.677755	0.430353	0.554167	1.04612	1.6162	2.05908	1.5735	1.62474	1.16183	1.46218	3.01285	3.20217	1.96596	1.30398	2.32484	2.25265	1.15658
	13	0.766529	0.524793	0.569647	0.929019	1.41053	2.66452	1.27254	1.32099	0.788501	0.995807	1.06861	0.797101	2.54894	0.657676	1.53488	1.33264	0.301031
	14		1.03926	1.13665	0.63655	0.321063	0.751029	1.38223	1.20492	0.738241	0.743802	0.193416	0.291322	1.98745	0.333333	0.645228	0.380952
	15			0.794297	0.370672	0.192229	0.22449	0.977505	0.793878	0.778689	0.67418	0.246436	0.508368	1.41788	0.231084	0.202062
	16				0.191446	0.0529532	0.0753564	0.346939	0.525458	0.631148	0.576687	0.560327	0.620619	0.746362	0.307377
	17					0.132383	0.162933	0.283096	0.177189	0.313646	0.410204	0.451943	0.487603	0.273663
7	1					1.16421	1.33121	1.25053	0.840336	0.78481	1.40086	1.14967	1.22489	1.94505					7																		7
	2					1.68293	1.2585	0.956818	1.3058	1.43886	0.773109	1.28078	0.470588	0.699561	0.492341
	3			2.41031	3.55479	2.63158	1.63387	0.606818	0.668182	0.465934	1.10629	0.674419	1.16199	0.441304	0.608315	0.36105
	4		2.73392	3.15468	3.0427	3.22779	2.07551	1.21412	0.913832	0.655629	0.700219	1.17354	0.93617	1.45752	0.63913	0.531729	0.842451
	5	2.59868	2.44444	1.50844	2.1649	2.18966	2.62555	3.46804	3.00221	2.36645	1.25442	1.16193	1.43261	1.51293	1.70175	1.23043	1.03063	1.84026
	6	1.74561	2.1453	2.69703	2.59664	2.20211	2.69684	2.89852	1.7044	2.47619	2.65996	1.63333	1.80132	1.75	2.20395	2.7011	2.52203	2.65044
	7	2.07872	1.48936	2.42161	2.54681	2.01253	2.45114	1.81109	2.20332	2.64211	2.68	1.04232	0.967105	0.932462	1.82418	2.81858	4.13152	3.79148
	8	1.35158	1.52431	1.89004	2.54393	2.40084	1.91511	0.651822	0.850716	3.5812	3.01957	1.72985	0.659483	0.893246	1.08952	1.31223	1.74449	2.74834
	9	1.55907	1.65053	2.12682	2.57292	3.10669	1.71074	0.216162	0.508097	2.1357	2.60381	2.32618	1.11398	1.43202	1.05388	1.09032	0.830108	1.52043
	10	0.951374		2.18354	1.29193	2.56237	2.04555	0.322515	0.358871	1.70539	2.48085	2.47222	2.09071	1.52043	1.1822	0.89172	0.963675	0.905063
	11	0.627368	0.623679	1.11368	1.33192	2.00858	1.93555	1.06098	0.896552	1.64682	2.16525	3.29437	3.06237	1.34737	1.63924	1.79789	1.22059	1.14046
	12	0.705637	0.502083	0.797495	1.20168	1.81607	2.00846	1.69199	1.56646	0.981633	1.56458	3.08511	3.11465	2.01903	1.57023	2.4135	1.92585	1.12448
	13	0.799587	0.479339	0.590062	0.943867	1.63291	2.61359	1.25866	1.47023	0.646817	1.15942	1.12863	1.08903	2.6603	0.720165	1.54167	1.48125	0.353183
	14		1.01232	1.18969	0.738241	0.364008	1.03292	1.35611	1.2731	0.693878	0.705521	0.201646	0.205761	2.16667	0.290984	0.62963	0.487654
	15			0.85102	0.396728	0.191837	0.310838	1.19547	0.818367	0.753061	0.589796	0.165984	0.529897	1.6214	0.180328	0.235656
	16				0.228571	0.0836735	0.0591837	0.530612	0.638776	0.653061	0.535787	0.495918	0.646091	0.721649	0.300613
	17					0.108163	0.220408	0.357143	0.193878	0.242857	0.419223	0.328571	0.480573	0.302658
8	1					1.00212	1.10448	1.14807	0.887265	0.781316	1.17787	1.08261	1.17826	1.87991					8																		8
	2					1.60135	1.1542	1.00454	1.1	1.33846	0.764454	1.13696	0.449024	0.664488	0.511931
	3			2.54667	3.66059	2.74142	1.67963	0.543578	0.616253	0.455947	1.04555	0.626068	1.18913	0.336957	0.56427	0.329718
	4		2.62391	3.14693	3.275	3.06136	2.32184	1.06834	0.782313	0.615213	0.667391	1.07375	0.978678	1.67177	0.550976	0.554585	0.770563
	5	2.39394	2.29512	1.30526	2.14712	2.11207	2.67105	3.57403	3.03778	2.2382	1.01327	1.04615	1.45435	1.50862	1.70022	0.980349	1.13786	1.97174
	6	1.64425	1.8806	2.58244	2.58511	2.49474	3.07447	3.0794	1.36211	2.69197	2.81655	1.72991	1.84735	1.84498	2.26915	2.57675	2.34945	2.55799
	7	2.04946	1.45806	2.39914	2.67238	2.29574	2.64706	1.87164	2.40126	2.66808	2.90869	1.10913	0.925439	1.01307	1.95445	2.89011	4.03394	3.56793
	8	1.30968	1.51592	1.84632	2.62791	2.5074	2.22292	0.867886	1.14375	3.7257	3.08952	1.58333	0.763557	0.980435	1.15755	1.34632	1.61304	2.67177
	9	1.50641	1.6766	2.05053	2.46639	3.08298	1.91564	0.274747	0.705882	2.34672	2.84848	2.2103	1.21957	1.46405	1.00215	1.09808	0.787554	1.53205
	10	0.908511		1.75214	1.28661	2.41915	2.36611	0.462626	0.517172	2.06709	2.90086	2.69214	2.1413	1.47558	1.1097	0.803383	1.00212	0.813559
	11	0.55	0.491667	1.01875	1.20421	1.72824	2.24043	1.36864	1.00202	1.77339	2.57543	3.50108	2.95455	1.25157	1.79958	1.70825	1.29175	1.18658
	12	0.693582	0.38843	0.552795	1.08142	1.74947	2.22151	1.72393	1.62168	1.03909	1.63103	2.82378	3.0364	2.13502	1.3048	2.27542	1.92227	1.08264
	13	0.852761	0.534836	0.726708	1.14792	1.59579	2.70065	1.22449	1.22746	0.692623	0.919255	0.943867	0.851546	2.45032	0.493802	1.46888	1.38095	0.186475
	14		1.16838	1.25462	0.685072	0.349693	0.904762	1.2438	1.14754	0.739754	0.655031	0.198364	0.229039	2.01663	0.220165	0.565574	0.311475
	15			0.884146	0.305499	0.158859	0.228106	0.954918	0.782077	0.812627	0.601626	0.245935	0.495885	1.44099	0.170082	0.141104
	16				0.195519	0.0753564	0.077551	0.408998	0.503055	0.686992	0.53252	0.546748	0.590909	0.698152	0.252546
	17					0.105906	0.150713	0.309572	0.235772	0.339431	0.394309	0.376016	0.461224	0.25102
9	1					1.06765	1.16632	1.09342	0.845339	0.78178	1.20607	1.186	1.17904	1.81579					9																		9
	2					1.63839	1.34773	0.941043	1.04213	1.30283	0.724359	1.00873	0.519651	0.551422	0.463895
	3			2.35862	3.46101	2.51716	1.65596	0.603645	0.735892	0.415385	1.05677	0.650964	1.00218	0.336245	0.61488	0.396061
	4		2.73258	3.21882	3.14191	3.12586	2.21412	1.24036	0.925508	0.747228	0.783664	1.27669	0.989177	1.49231	0.663755	0.577681	0.919214
	5	2.47912	2.13248	1.24059	2.12393	1.99788	2.53611	3.54214	3.11486	2.46563	1.29204	1.2053	1.59649	1.67615	1.67763	1.13129	1.1011	2.2053
	6	1.57484	2.08511	2.51599	2.4109	2.09034	2.66737	2.91631	1.38901	2.70806	2.6942	1.77778	1.93612	1.91266	2.34146	2.53571	2.44098	2.71973
	7	1.9617	1.39362	2.07856	2.32696	2.0021	2.22851	1.82268	2.22996	2.45435	2.60444	1.11283	0.951965	0.973742	1.89357	2.74388	4.17593	3.625
	8	1.28602	1.3903	1.81837	2.46025	2.46849	2.01643	0.739394	1.17418	3.65435	2.90132	1.67177	0.67756	0.83114	1.12115	1.33705	1.74165	2.77042
	9	1.57839	1.56809	2.01053	2.56133	2.99368	1.84232	0.292929	0.554656	2.3903	2.7115	2.07495	1.17904	1.40919	1.0129	1.19099	0.935065	1.49683
	10	0.809322		1.81953	1.30625	2.33898	2.11715	0.429735	0.436992	1.90377	2.76026	2.68319	2.1663	1.30407	1.25581	0.875	1.15074	0.746862
	11	0.590814	0.594142	1.03782	1.07203	1.72979	1.8203	1.2428	0.99182	1.68476	2.3673	3.31236	2.73866	1.05907	1.68277	1.79873	1.31303	1.02101
	12	0.758333	0.421488	0.480249	1.03354	1.66176	2.00213	1.60581	1.55165	0.983573	1.37996	2.65451	3.07759	1.94703	1.25988	2.51805	2.02516	0.97921
	13	0.754639	0.538144	0.635611	0.975052	1.34511	2.64668	1.2551	1.31276	0.656442	1.06458	0.939457	0.744283	2.44235	0.603306	1.47826	1.12215	0.179592
	14		1.04527	1.11704	0.553061	0.222904	0.625767	1.35597	1.13088	0.697959	0.734568	0.165984	0.277207	2.10331	0.225873	0.584016	0.309426
	15			0.753564	0.317719	0.14898	0.188139	0.938525	0.783673	0.830266	0.659184	0.274029	0.606996	1.3781	0.169734	0.179959
	16				0.173469	0.0773931	0.0610998	0.335378	0.452138	0.572597	0.574338	0.597536	0.545267	0.720165	0.25102
	17					0.089613	0.132383	0.269939	0.167006	0.242363	0.360489	0.385714	0.478439	0.296524
10	1					0.82563	0.983087	0.92569	0.688285	0.717622	1.19783	1.07391	1.23965	1.86492					10																		10
	2					1.78242	1.35333	1.18568	1.36957	1.37174	0.682979	1.04575	0.472885	0.681128	0.660907
	3			2.27088	3.63739	2.76786	1.89238	0.712054	0.928571	0.46841	1.14069	0.618644	1.05652	0.35141	0.495671	0.326134
	4		2.4693	3.02597	3.05011	3.25225	2.47191	1.28571	1.07095	0.806593	0.819565	1.33045	0.899787	1.40044	0.544469	0.493478	0.761388
	5	2.42609	2.25793	1.30849	2.10187	2.0566	2.45923	3.78222	3.29778	2.62389	1.44934	1.38293	1.53796	1.38612	1.58388	0.893478	1.00436	1.66087
	6	1.67672	2.11017	2.55532	2.36307	2.10124	2.65344	2.88936	1.40632	2.65021	3.21652	2.15299	2.37528	1.95445	2.29011	2.41575	2.06754	2.26856
	7	1.88248	1.3277	1.99791	2.20833	1.96888	2.40333	1.94203	2.15304	2.73784	2.89845	1.23516	1.01078	1.09978	1.89783	3.07912	3.87919	3.25055
	8	1.20374	1.32292	1.55852	2.4268	2.50936	2.05176	0.674847	1.13402	3.80171	2.96328	1.75162	0.698718	0.937365	1.13578	1.41991	1.72234	2.29935
	9	1.64496	1.61587	1.97303	2.44948	2.83368	1.92754	0.272358	0.462322	2.03171	2.59957	2.38758	1.27527	1.50431	1.00633	1.06157	0.7897	1.34461
	10	0.974948		1.86947	1.31458	2.17263	2.09485	0.512245	0.525355	1.67296	2.69099	2.73932	2.25751	1.25159	1.36975	0.78903	0.96603	0.705637
	11	0.675676	0.672234	0.93763	1.1153	1.68201	1.77847	1.31493	1.07143	1.41309	2.20168	3.2383	3.11111	1.18828	1.68125	1.62055	1.02092	1.02935
	12	0.787755	0.501022	0.734021	1.19502	1.76458	2.12605	1.48975	1.56531	0.9591	1.45979	2.71097	3.11253	2.05208	1.28926	2.19247	1.84388	0.914761
	13	0.813525	0.696099	0.85567	1.06818	1.49275	2.36952	1.21881	1.17108	0.737271	0.987654	0.914938	0.585567	2.46347	0.549383	1.40825	1.20041	0.162551
	14		1.05738	1.13292	0.492843	0.194274	0.486708	1.14694	0.983707	0.708758	0.74538	0.111789	0.283368	1.92133	0.229979	0.570842	0.295082
	15			0.759184	0.236735	0.0875764	0.132383	0.885714	0.655804	0.816701	0.608961	0.255578	0.643892	1.23554	0.149284	0.189796
	16				0.167347	0.0591837	0.0346232	0.287169	0.437882	0.505092	0.560081	0.540984	0.471311	0.677618	0.25462
	17					0.0714286	0.11609	0.240326	0.14664	0.183299	0.378819	0.325866	0.394683	0.255624

## Sheet: CV
MeanVelocity
Signals of insufficient quality were excluded from the property maps. Signals could be rejected based on noise low amplitude, large artefact or ventricluar farfields that could not be substracted.
		1	2	3	4	5	6	7	8	9	10	11	12	13	14	15	16	17
1	1					0.559909	0.59298	0.572741	0.598425	0.676994	0.765199	0.764194	0.676962	0.663987					1																		1
	2					0.616065	0.65651	0.64995	0.678464	0.705951	0.727928	0.797795	0.724713	0.663287	0.603612
	3			0.605104	0.725409	0.660847	0.680081	0.650405	0.687372	0.746842	0.809167	0.805887	0.781828	0.691826	0.631765	0.610185
	4		0.793608	0.824716	0.675265	0.699035	0.698282	0.656544	0.64236	0.664995	0.778661	0.845475	0.846695	0.740392	0.673047	0.66986	0.639249
	5	0.747859	0.834285	0.814174	0.791646	0.741582	0.639811	0.654725	0.664513	0.663737	0.688226	0.784818	0.945978	0.832459	0.757632	0.665823	0.694363	0.709141
	6	0.771975	0.961699	1.07273	0.985454	0.938035	0.99394	0.839983	0.774313	0.709892	0.745368	0.768334	0.853899	0.867913	0.808689	0.800412	0.722284	0.731943
	7	0.865737	0.963508	1.14369	1.17427	1.13772	1.15367	1.00756	1.01757	0.832811	0.829217	0.804593	0.818973	0.837961	0.840682	0.773621	0.78545	0.736035
	8	0.999963	1.09743	1.13194	1.28783	1.25151	1.29512	1.10374	0.960525	0.753643	0.928085	0.84667	0.8078	0.820425	0.841691	0.844325	0.799523	0.73228
	9	0.923081	0.970076	1.06189	0.972122	0.934926	1.00561	1.01074	0.912721	0.856042	0.933014	0.862988	0.825927	0.861001	0.924741	0.847451	0.792562	0.773464
	10	0.852777	0.866156	0.946246	0.898999	0.855336	0.939234	0.894009	0.853606	0.784989	0.828273	0.780681	0.794656	0.925443	0.972858	0.830296	0.735957	0.67764
	11	0.85596	0.786457	0.830724	0.788384	0.745942	0.796366	0.800454	0.778976	0.68902	0.69931	0.743175	0.800476	0.882436	0.994809	0.799795	0.707677	0.64582
	12	0.880732	0.79322	0.796958	0.717588	0.634336	0.726938	0.765291	0.76772	0.644311	0.670095	0.74277	0.746921	0.8915	0.995082	0.759742	0.671558	0.595547
	13	0.935927	0.870713	0.826152	0.740599	0.654988	0.660791	0.762735	0.754652	0.657522	0.692472	0.754973	0.844001	0.976777	0.961965	0.805356	0.688053	0.55829
	14		0.833604	0.844643	0.736104	0.627664	0.645442	0.774523	0.828045	0.725834	0.710036	0.775957	0.773671	0.946206	0.91196	0.785764	0.674627
	15			0.875242	0.808878	0.676495	0.68418	0.830606	0.99657	0.814429	0.764859	0.761802	0.789187	0.897448	0.838005	0.785038
	16				0.908702	0.747555	0.702618	0.853573	1.15932	0.84396	0.766651	0.746683	0.715637	0.773867	0.803629
	17					0.802341	0.72164	0.901083	1.33527	0.891879	0.755505	0.715607	0.676457	0.735771
2	1					0.580171	0.576183	0.585921	0.583364	0.682548	0.722633	0.729524	0.647274	0.660181					2																		2
	2					0.600016	0.625464	0.674702	0.663806	0.719433	0.697644	0.71309	0.720651	0.649064	0.597875
	3			0.615139	0.605554	0.605124	0.655347	0.636837	0.679768	0.684919	0.720276	0.714352	0.72076	0.661355	0.62531	0.600609
	4		0.729955	0.731088	0.713515	0.674173	0.647111	0.636181	0.683137	0.682342	0.678353	0.752967	0.771842	0.736157	0.636489	0.649876	0.619493
	5	0.81419	0.806285	0.82111	0.808641	0.78925	0.723572	0.712923	0.70974	0.71661	0.697562	0.74051	0.876428	0.819706	0.735813	0.650496	0.647366	0.659374
	6	0.793067	0.955855	0.966183	1.02409	1.04727	1.04367	0.904717	0.848873	0.790518	0.785073	0.782955	0.889052	0.895589	0.87268	0.812593	0.736949	0.709904
	7	0.925456	1.04318	1.16405	1.33399	1.29169	1.25322	1.10976	1.03441	0.861449	0.874728	0.84998	0.863528	0.87472	0.880402	0.830619	0.797108	0.751779
	8	1.11768	1.19825	1.31801	1.36908	1.26822	1.34994	1.17697	1.02245	0.802002	0.840114	0.902016	0.897138	0.864871	0.917948	0.90297	0.760883	0.717255
	9	0.991395	1.06026	1.05715	0.979013	0.978147	1.08514	1.05337	0.981165	0.846392	0.803077	0.830427	0.899631	0.95948	1.07026	0.870268	0.761805	0.722083
	10	0.867995	0.898813	0.900883	0.885631	0.833255	0.964955	0.912606	0.867203	0.772081	0.799838	0.806939	0.82046	1.05169	1.02689	0.881772	0.750684	0.698884
	11	0.824567	0.771241	0.754813	0.739584	0.786908	0.860836	0.826708	0.758186	0.655913	0.698952	0.744984	0.79202	0.967152	0.992894	0.884842	0.752053	0.670313
	12	0.839607	0.767004	0.761184	0.702907	0.667829	0.755847	0.814399	0.753735	0.63392	0.652418	0.737523	0.781306	1.04888	0.989183	0.838533	0.658264	0.618961
	13	0.857502	0.799297	0.784709	0.739437	0.698842	0.704421	0.769569	0.734167	0.64829	0.694657	0.837462	0.845565	1.0613	0.975055	0.833379	0.722644	0.608533
	14		0.866301	0.91304	0.715686	0.611531	0.65591	0.798648	0.823195	0.739882	0.768818	0.86152	0.887007	0.994179	0.966253	0.846068	0.729563
	15			0.927548	0.869908	0.681211	0.680057	0.906786	1.02539	0.843335	0.76527	0.800754	0.825804	0.905649	0.82348	0.780659
	16				0.931519	0.756677	0.718757	0.964588	1.17217	0.860605	0.740512	0.752355	0.750739	0.792476	0.754395
	17					0.801251	0.734865	0.965284	1.4879	0.904915	0.739356	0.715598	0.687233	0.728754
3	1					0.693566	0.598479	0.594573	0.607913	0.677624	0.762213	0.744276	0.695759	0.663298					3																		3
	2					0.707479	0.655196	0.697725	0.665617	0.756756	0.735541	0.747001	0.690464	0.651103	0.589115
	3			0.628246	0.707581	0.682626	0.680758	0.644719	0.65863	0.671922	0.737182	0.74285	0.736884	0.69259	0.622798	0.646109
	4		0.656358	0.676831	0.716626	0.718033	0.692172	0.629792	0.605348	0.637329	0.705715	0.797211	0.757919	0.71578	0.665164	0.675695	0.659912
	5	0.7229	0.749039	0.708849	0.754041	0.785133	0.682325	0.653863	0.642502	0.643482	0.635654	0.729612	0.817287	0.831594	0.73058	0.702935	0.694464	0.696315
	6	0.741406	0.807088	0.860481	0.890637	1.02633	0.940233	0.783793	0.752342	0.69055	0.721616	0.750966	0.888387	0.865444	0.792076	0.789481	0.743049	0.737471
	7	0.839547	0.899749	0.995668	1.16958	1.13153	1.09678	1.00182	0.994544	0.834224	0.798524	0.838033	0.846761	0.854895	0.78987	0.755798	0.777109	0.726254
	8	1.03148	1.12589	1.17683	1.2417	1.16679	1.18212	1.02508	0.99759	0.736354	0.945637	0.923431	0.863315	0.886055	0.815809	0.786082	0.785556	0.739171
	9	0.932419	0.999563	1.02423	0.954614	0.92082	1.02952	0.955487	0.938234	0.898882	0.946388	0.927139	0.873608	0.919293	0.864961	0.819673	0.792453	0.691931
	10	0.823006	0.856478	0.887272	0.860282	0.856937	0.937389	0.87529	0.84426	0.822046	0.896824	0.865418	0.860523	0.923703	0.986147	0.86054	0.766766	0.683064
	11	0.826559	0.797546	0.79425	0.769453	0.735286	0.893537	0.841456	0.80736	0.73559	0.758454	0.835094	0.80036	0.92844	1.00263	0.845109	0.723752	0.642623
	12	0.873159	0.790066	0.806341	0.743108	0.66357	0.723639	0.777438	0.788713	0.68512	0.701538	0.812052	0.815296	0.949085	0.931047	0.81549	0.741229	0.667645
	13	0.949338	0.827023	0.806058	0.758101	0.689197	0.708875	0.762154	0.796832	0.718161	0.714067	0.843509	0.844481	0.978706	0.9037	0.809036	0.729182	0.636754
	14		0.862005	0.839603	0.705576	0.630726	0.680086	0.811719	0.897966	0.788329	0.743704	0.813461	0.826435	0.947062	0.926909	0.816859	0.739573
	15			0.855772	0.834991	0.690401	0.692295	0.915262	1.04806	0.912768	0.786748	0.792296	0.793457	0.872649	0.840884	0.806831
	16				0.920673	0.748661	0.706042	0.937133	1.14881	0.914428	0.805352	0.781141	0.745471	0.770706	0.783045
	17					0.814166	0.74429	0.961412	1.34277	0.95185	0.76639	0.738505	0.683988	0.737238
4	1					0.604595	0.56853	0.553165	0.573454	0.653359	0.704776	0.721718	0.720376	0.666544					4																		4
	2					0.620014	0.654142	0.659095	0.653296	0.690363	0.715275	0.778503	0.731269	0.667402	0.615557
	3			0.605438	0.669367	0.673816	0.665501	0.669407	0.717399	0.723555	0.815964	0.79993	0.793007	0.723575	0.66755	0.662198
	4		0.682668	0.70807	0.685814	0.690163	0.695483	0.717181	0.691237	0.711357	0.764516	0.860227	0.837758	0.803845	0.704646	0.676829	0.68263
	5	0.718906	0.727472	0.724422	0.723809	0.73896	0.686976	0.741673	0.770512	0.694141	0.729807	0.812509	0.980143	0.876542	0.789177	0.682524	0.67662	0.707174
	6	0.703162	0.755225	0.803843	0.828449	0.889993	0.914219	0.753277	0.74749	0.723722	0.805984	0.861738	0.936064	1.00289	0.891021	0.832731	0.722441	0.773246
	7	0.760405	0.868387	0.932731	1.10448	1.12162	1.07672	0.953476	0.909446	0.783023	0.840171	0.88486	0.930201	0.900522	0.886864	0.886097	0.834891	0.75086
	8	0.886731	0.989041	1.08538	1.1999	1.12669	1.15169	0.960911	0.943286	0.66712	0.914203	0.95587	0.924516	0.850948	0.862963	0.881085	0.834619	0.792501
	9	0.852145	0.94935	1.04656	0.988645	0.903026	1.02262	0.927199	0.874804	0.818068	0.810151	0.887456	0.891018	0.917109	0.919486	0.873228	0.823173	0.761523
	10	0.803888	0.852436	0.952416	0.871355	0.856265	0.928194	0.824215	0.80614	0.784095	0.788075	0.854531	0.786767	0.887101	1.01564	0.86925	0.785115	0.676789
	11	0.78275	0.741185	0.765609	0.760459	0.760874	0.821199	0.737923	0.747799	0.700257	0.716111	0.78146	0.729935	0.810737	0.875213	0.802365	0.67667	0.604923
	12	0.854057	0.787358	0.755972	0.73165	0.656411	0.707032	0.789603	0.741338	0.630088	0.643382	0.73319	0.691093	0.782669	0.817063	0.803408	0.696005	0.606597
	13	0.909102	0.814328	0.809704	0.754762	0.654567	0.685531	0.654306	0.692096	0.639523	0.635259	0.697989	0.708874	0.796106	0.834365	0.831213	0.744605	0.621244
	14		0.876734	0.808122	0.648274	0.575561	0.613948	0.741367	0.737868	0.734954	0.681697	0.681575	0.68845	0.794387	0.837963	0.819205	0.74483
	15			0.805341	0.717311	0.604878	0.621824	0.876134	0.895158	0.785318	0.704075	0.694053	0.69237	0.7657	0.764928	0.738164
	16				0.796716	0.660127	0.637295	0.857259	1.13693	0.805731	0.712815	0.680624	0.66256	0.666141	0.701326
	17					0.75625	0.68249	0.905881	1.40626	0.873248	0.691742	0.671622	0.612865	0.62975
5	1					0.547213	0.553908	0.544717	0.584945	0.684096	0.731103	0.726208	0.649236	0.633914					5																		5
	2					0.583124	0.62218	0.665785	0.665022	0.750249	0.721477	0.749862	0.670073	0.660418	0.592354
	3			0.568117	0.627536	0.672695	0.726957	0.689633	0.704901	0.694253	0.743057	0.76597	0.73229	0.643603	0.594506	0.623525
	4		0.704979	0.71843	0.698309	0.721603	0.662177	0.659256	0.670557	0.687257	0.726449	0.765593	0.75155	0.695906	0.623471	0.652347	0.715566
	5	0.680567	0.750697	0.705107	0.772275	0.765733	0.706902	0.747036	0.827885	0.719176	0.697885	0.738078	0.815736	0.756799	0.752399	0.649425	0.691094	0.753899
	6	0.707359	0.787177	0.873193	0.916161	0.986962	0.997181	0.898269	0.742461	0.739647	0.725857	0.746294	0.839306	0.896232	0.794506	0.810806	0.728168	0.780451
	7	0.759745	0.903385	0.991351	1.15768	1.31537	1.21254	0.991325	0.963139	0.796412	0.78514	0.818217	0.835672	0.838322	0.832706	0.816499	0.803075	0.770878
	8	1.0756	1.1075	1.12228	1.22914	1.13452	1.15085	1.02657	0.941565	0.669136	0.848879	0.837683	0.805297	0.876769	0.829401	0.848581	0.854317	0.79626
	9	0.941969	1.06945	0.983716	0.987778	0.950508	1.04721	0.972767	0.952294	0.819163	0.795188	0.83919	0.847014	0.890273	0.935849	0.867789	0.822405	0.742697
	10	0.837588	0.864916	0.874824	0.878962	0.88236	0.885886	0.885514	0.844571	0.774654	0.799896	0.785042	0.827317	0.926888	0.975465	0.836412	0.775453	0.704823
	11	0.836891	0.811212	0.754858	0.768198	0.749529	0.831533	0.827583	0.754832	0.696205	0.700714	0.760874	0.835355	0.932936	0.918182	0.828116	0.713946	0.645587
	12	0.882283	0.810731	0.77766	0.744106	0.673562	0.707819	0.738056	0.70986	0.664058	0.646567	0.695712	0.794242	0.942246	0.918331	0.786707	0.696604	0.608908
	13	0.89194	0.810638	0.77041	0.718789	0.648708	0.715317	0.699831	0.69662	0.630226	0.646456	0.713281	0.780244	0.98609	0.936593	0.827672	0.71722	0.605596
	14		0.861156	0.814838	0.676328	0.632916	0.621071	0.760754	0.764482	0.699783	0.718508	0.709436	0.752966	0.902969	0.888078	0.840459	0.765976
	15			0.873383	0.832615	0.698191	0.677731	0.872612	1.01183	0.775698	0.720664	0.71176	0.71102	0.781109	0.787692	0.772844
	16				0.849194	0.734877	0.697219	0.89458	1.21159	0.798839	0.689197	0.69902	0.66432	0.689325	0.750506
	17					0.773811	0.708873	0.931697	1.47396	0.893484	0.681862	0.660465	0.623648	0.671081
6	1					0.572435	0.570869	0.580941	0.607623	0.660215	0.696814	0.800715	0.709465	0.68155					6																		6
	2					0.607694	0.618332	0.635375	0.649849	0.668612	0.692911	0.797172	0.734973	0.64914	0.608252
	3			0.632054	0.618073	0.662565	0.673529	0.66054	0.662888	0.675141	0.720417	0.808863	0.74944	0.679651	0.669611	0.644548
	4		0.708943	0.745222	0.721015	0.744968	0.669458	0.664907	0.670814	0.66903	0.730152	0.775722	0.753264	0.695966	0.62874	0.674707	0.703943
	5	0.734261	0.762094	0.813456	0.832461	0.871848	0.780902	0.747193	0.733707	0.666227	0.656256	0.739054	0.853122	0.789177	0.729774	0.659855	0.676758	0.728063
	6	0.7331	0.85474	0.916357	1.02201	1.13141	1.17414	0.821958	0.768981	0.763577	0.712903	0.760261	0.859849	0.887406	0.784887	0.733975	0.689801	0.758192
	7	0.862225	0.974742	1.11227	1.403	1.44213	1.35487	1.06645	1.06271	0.814944	0.833733	0.860197	0.873791	0.899421	0.90109	0.859264	0.711283	0.660962
	8	0.974507	1.08792	1.18217	1.40741	1.37583	1.36569	1.11844	1.04356	0.770916	0.869118	0.810352	0.869626	0.912473	0.943932	0.812481	0.774349	0.667695
	9	0.864545	0.986844	0.986371	0.987831	0.94947	1.0933	0.998757	0.968445	0.824766	0.762909	0.814439	0.941957	1.03272	0.997613	0.826124	0.75949	0.705389
	10	0.758091	0.791119	0.815915	0.880749	0.89913	0.981105	0.88081	0.871458	0.75221	0.719711	0.780587	0.868967	1.05637	1.08251	0.792565	0.725583	0.638298
	11	0.808653	0.742574	0.73526	0.716433	0.785441	0.864814	0.82836	0.790282	0.680831	0.704063	0.812495	0.878954	1.00597	0.981771	0.780304	0.671954	0.620358
	12	0.830976	0.778749	0.759979	0.729581	0.722554	0.770557	0.80735	0.749414	0.658389	0.662371	0.797517	0.89698	0.982869	0.959766	0.77171	0.683259	0.62221
	13	0.937387	0.855844	0.851108	0.750168	0.666132	0.721442	0.773226	0.773088	0.682398	0.689404	0.851343	0.92126	1.03496	0.900885	0.815391	0.704095	0.605405
	14		0.930184	0.936006	0.723686	0.632821	0.648415	0.82688	0.844927	0.754206	0.740927	0.743926	0.822604	0.90058	0.880481	0.816985	0.715345
	15			0.971069	0.872488	0.704154	0.700816	0.859874	1.04846	0.796657	0.734938	0.75968	0.782421	0.862806	0.847797	0.798418
	16				0.878723	0.762261	0.707286	0.902438	1.20042	0.826434	0.722882	0.708592	0.704115	0.788168	0.835504
	17					0.822744	0.771223	1.00012	1.41969	0.882994	0.698367	0.687186	0.679545	0.766312
7	1					0.608525	0.561223	0.5538	0.55808	0.590424	0.64484	0.732976	0.688741	0.71475					7																		7
	2					0.637906	0.67652	0.654193	0.630476	0.690296	0.711958	0.764927	0.69535	0.673374	0.658928
	3			0.589271	0.622689	0.67983	0.706793	0.638058	0.63787	0.647105	0.728004	0.768584	0.76097	0.695918	0.658814	0.642097
	4		0.741181	0.77142	0.705395	0.737336	0.693389	0.643741	0.614272	0.682339	0.718909	0.77217	0.815013	0.745517	0.676754	0.719015	0.682902
	5	0.722047	0.80489	0.808791	0.783039	0.783195	0.689674	0.671513	0.680423	0.719187	0.687325	0.749703	0.888522	0.817723	0.789118	0.687745	0.689627	0.709213
	6	0.724165	0.888317	0.942994	0.966924	1.05642	0.971714	0.777818	0.757813	0.723405	0.803512	0.759101	0.904977	0.909589	0.833041	0.802609	0.765603	0.750846
	7	0.874737	1.01441	1.09528	1.31551	1.23858	1.26095	1.01744	0.956324	0.790736	0.797547	0.798959	0.856783	0.913125	0.889793	0.820829	0.787595	0.67638
	8	1.09478	1.17419	1.18784	1.34354	1.16608	1.24007	1.03736	0.980607	0.695353	0.839364	0.807205	0.860982	0.912713	0.929675	0.853808	0.770025	0.686594
	9	0.939488	1.0217	0.986112	0.926564	0.919307	1.0669	1.02404	0.955321	0.880754	0.805849	0.848649	0.870312	1.00972	1.05548	0.891836	0.813562	0.715131
	10	0.75871	0.79487	0.834657	0.832126	0.843115	0.87981	0.905879	0.848466	0.740648	0.753356	0.807545	0.841746	1.03087	1.08491	0.911663	0.788031	0.689907
	11	0.779141	0.787222	0.725979	0.7047	0.741707	0.795822	0.804036	0.777296	0.675923	0.701547	0.791689	0.79579	1.06726	1.06529	0.93178	0.754088	0.689296
	12	0.815746	0.776907	0.755097	0.701728	0.646901	0.731781	0.790467	0.751565	0.628332	0.663767	0.806635	0.836527	1.02518	1.04848	0.901411	0.750342	0.654565
	13	0.892148	0.834371	0.856098	0.729945	0.667933	0.653811	0.769837	0.757377	0.689812	0.753286	0.859746	0.892884	1.04218	0.97672	0.907034	0.757396	0.634759
	14		0.934446	0.898145	0.701437	0.59568	0.626408	0.855947	0.8782	0.779993	0.776751	0.785918	0.825773	0.908456	0.916	0.896124	0.779597
	15			0.93019	0.829513	0.694971	0.675155	0.970284	1.1041	0.830775	0.782768	0.787344	0.809109	0.855339	0.820445	0.805351
	16				0.869542	0.740434	0.691553	0.950522	1.27362	0.873841	0.773927	0.739867	0.720559	0.749556	0.804149
	17					0.807618	0.739385	1.05576	1.49661	0.962327	0.738095	0.720355	0.703701	0.736775
8	1					0.630311	0.588904	0.592941	0.605656	0.688842	0.735795	0.738993	0.655308	0.634993					8																		8
	2					0.623766	0.628725	0.646419	0.654553	0.694844	0.729313	0.763674	0.691782	0.632897	0.601753
	3			0.604005	0.622135	0.671905	0.643578	0.599886	0.640218	0.706273	0.730201	0.772735	0.751523	0.654216	0.617206	0.629675
	4		0.646162	0.741574	0.681906	0.719568	0.677943	0.608166	0.630521	0.616189	0.660929	0.720926	0.75165	0.715988	0.637052	0.687922	0.690297
	5	0.689092	0.75507	0.769399	0.769166	0.769654	0.70269	0.682679	0.734468	0.612378	0.642664	0.727699	0.826821	0.816339	0.715431	0.646739	0.703618	0.77601
	6	0.721511	0.871141	0.910526	0.92126	0.969631	0.930535	0.87866	0.801596	0.751825	0.775177	0.765785	0.859812	0.895103	0.799252	0.744084	0.722625	0.769645
	7	0.853123	1.0083	1.04367	1.20393	1.30621	1.30508	1.12831	1.0914	0.874259	0.832413	0.788496	0.817318	0.835578	0.778584	0.731302	0.709293	0.700386
	8	1.09992	1.1515	1.23834	1.33232	1.20197	1.19486	1.06454	0.999842	0.809914	0.847637	0.843612	0.822636	0.814945	0.806603	0.783034	0.745151	0.710364
	9	0.988653	1.11649	1.08793	1.0424	0.992087	1.02134	0.969069	0.927455	0.870795	0.874441	0.824995	0.858797	0.884981	0.903475	0.818997	0.795419	0.739709
	10	0.837734	0.868958	0.861073	0.897067	0.859924	0.918543	0.879636	0.858669	0.768975	0.790571	0.790601	0.842223	0.90534	0.914261	0.82873	0.786497	0.707039
	11	0.801005	0.751389	0.736015	0.749846	0.772129	0.814134	0.835331	0.829223	0.700347	0.703768	0.742772	0.802492	0.870633	0.904572	0.785966	0.728358	0.688554
	12	0.794436	0.728038	0.724753	0.736411	0.638542	0.725952	0.77588	0.729002	0.627238	0.643983	0.715662	0.830102	0.910145	0.838451	0.764724	0.692952	0.611712
	13	0.797265	0.768845	0.755787	0.691088	0.663511	0.669761	0.765396	0.71248	0.648483	0.683104	0.770673	0.804045	0.91963	0.854395	0.828553	0.73712	0.644292
	14		0.818237	0.824455	0.687266	0.637339	0.64578	0.769828	0.831512	0.705215	0.712783	0.746576	0.78104	0.840371	0.833849	0.830615	0.786801
	15			0.955163	0.869218	0.715432	0.710063	0.90078	1.02021	0.783865	0.744048	0.752268	0.770627	0.784083	0.797387	0.796146
	16				0.899685	0.775901	0.729607	0.945553	1.19556	0.805501	0.708353	0.692188	0.690625	0.701412	0.791248
	17					0.821981	0.757639	0.932953	1.36154	0.879294	0.704744	0.672455	0.64115	0.709609
9	1					0.62755	0.5937	0.573337	0.565746	0.701231	0.737858	0.794724	0.735754	0.735586					9																		9
	2					0.629793	0.640532	0.664097	0.649344	0.689699	0.73551	0.796139	0.74482	0.698065	0.627014
	3			0.595865	0.680918	0.706741	0.688861	0.638331	0.684392	0.705113	0.756267	0.796222	0.712758	0.717635	0.650896	0.636282
	4		0.708607	0.740416	0.682492	0.724787	0.701178	0.651489	0.648843	0.665587	0.691137	0.765935	0.755748	0.684307	0.633239	0.669202	0.680189
	5	0.726955	0.802258	0.758304	0.798439	0.851585	0.773425	0.730019	0.740055	0.709589	0.676524	0.739289	0.84231	0.752258	0.673994	0.674736	0.695982	0.753448
	6	0.711066	0.839329	0.863808	0.995038	1.12082	1.02811	0.788625	0.78809	0.721682	0.770308	0.769548	0.868186	0.899299	0.796327	0.800423	0.750055	0.758255
	7	0.915973	1.04773	1.06373	1.32835	1.34863	1.30803	0.962478	0.938101	0.777068	0.864522	0.795888	0.862802	0.83896	0.792104	0.833745	0.828369	0.775399
	8	1.02595	1.11407	1.26358	1.42636	1.21086	1.20613	1.02011	0.958178	0.782038	0.869574	0.816727	0.848871	0.835834	0.82264	0.814977	0.757151	0.720757
	9	0.89899	0.967685	1.04588	1.01255	0.961591	0.981785	0.918664	0.945715	0.860831	0.904451	0.826478	0.870104	0.924639	0.927317	0.843384	0.80201	0.75216
	10	0.81212	0.816076	0.883946	0.909003	0.820245	0.876211	0.893275	0.852388	0.79313	0.837121	0.765995	0.800961	0.927687	1.00101	0.786944	0.744144	0.700837
	11	0.828628	0.799817	0.755842	0.761879	0.769347	0.796085	0.81718	0.7567	0.67281	0.726064	0.757136	0.834695	0.949689	0.94361	0.781651	0.681565	0.644397
	12	0.864927	0.805717	0.770281	0.743607	0.660005	0.72883	0.768436	0.730818	0.628119	0.671474	0.709748	0.84553	0.915538	0.894041	0.801309	0.677807	0.60511
	13	0.926045	0.890257	0.844301	0.764246	0.662733	0.69599	0.779565	0.753188	0.656757	0.693428	0.743021	0.816011	0.943671	0.926285	0.806463	0.722904	0.643129
	14		0.92675	0.887559	0.749608	0.656959	0.655856	0.884004	0.886969	0.729936	0.716003	0.740901	0.812054	0.913175	0.915699	0.872487	0.761926
	15			1.00763	0.883921	0.730705	0.730688	1.04447	1.17409	0.799223	0.695404	0.749061	0.78059	0.819931	0.855397	0.799706
	16				0.884372	0.782533	0.732281	0.978335	1.28265	0.816704	0.703193	0.72001	0.713135	0.779967	0.869435
	17					0.838521	0.775855	1.04662	1.53333	0.895387	0.696823	0.711662	0.675235	0.777529
10	1					0.546527	0.516486	0.523648	0.537295	0.606111	0.671157	0.740252	0.694332	0.655512					10																		10
	2					0.571359	0.615751	0.622536	0.598533	0.627468	0.657261	0.763064	0.695504	0.650491	0.631422
	3			0.554335	0.601589	0.622674	0.615314	0.592047	0.561995	0.610551	0.730627	0.811011	0.751841	0.689356	0.669541	0.653656
	4		0.682099	0.666908	0.616926	0.646436	0.646735	0.590216	0.545524	0.583059	0.652506	0.775721	0.777043	0.755705	0.645365	0.690697	0.71358
	5	0.700995	0.750131	0.710649	0.744685	0.774399	0.735753	0.687157	0.659393	0.620752	0.631438	0.714462	0.763964	0.804784	0.679034	0.646619	0.702718	0.751557
	6	0.707568	0.784636	0.808867	0.995663	1.02883	0.962316	0.830567	0.789125	0.774147	0.674423	0.703428	0.841886	0.848981	0.718272	0.746719	0.684843	0.73391
	7	0.829242	0.918656	1.01002	1.40579	1.26733	1.18312	1.02658	1.06189	0.837171	0.790835	0.730757	0.779992	0.788702	0.777031	0.713505	0.739663	0.758534
	8	0.933358	1.11152	1.19589	1.36089	1.14886	1.22796	1.00266	0.949305	0.683487	0.881057	0.780208	0.788463	0.864013	0.842904	0.845535	0.84926	0.756567
	9	0.870812	0.960253	0.956769	0.936762	0.903964	0.962003	0.901157	0.944923	0.91491	0.89109	0.801621	0.867025	0.937984	0.961406	0.899614	0.841417	0.716216
	10	0.727256	0.813995	0.832077	0.812452	0.834331	0.884695	0.808747	0.899644	0.820049	0.887254	0.783365	0.82834	0.923496	0.973327	0.865442	0.769875	0.662527
	11	0.745642	0.703837	0.713945	0.702849	0.701827	0.76186	0.73804	0.788599	0.70959	0.754672	0.780647	0.784123	0.905934	0.955049	0.843332	0.719564	0.64089
	12	0.8129	0.711827	0.713573	0.693342	0.634527	0.664175	0.7449	0.753679	0.641894	0.670102	0.778193	0.812279	0.944915	0.98489	0.79828	0.665666	0.591927
	13	0.848609	0.817088	0.810076	0.696688	0.613715	0.610959	0.709939	0.743434	0.65683	0.642074	0.745834	0.829845	0.933808	0.92882	0.822893	0.701892	0.629858
	14		0.881618	0.842887	0.683116	0.605659	0.61434	0.793201	0.859306	0.720709	0.693351	0.814405	0.834442	0.863981	0.865791	0.811101	0.745423
	15			0.923339	0.790766	0.701542	0.687729	0.915236	1.04618	0.805156	0.718467	0.7445	0.742092	0.814132	0.845903	0.779856
	16				0.83566	0.758456	0.735172	0.927616	1.27941	0.822443	0.716461	0.7355	0.664411	0.712411	0.849036
	17					0.839467	0.789015	1.02858	1.57897	0.914647	0.717021	0.692386	0.643484	0.698861

## Sheet: Pref
Preferentiality
Signals of insufficient quality were excluded from the property maps. Signals could be rejected based on noise low amplitude, large artefact or ventricluar farfields that could not be substracted.
		1	2	3	4	5	6	7	8	9	10	11	12	13	14	15	16	17
1	1					1.22865	1.3614	1.38645	1.41935	1.44815	1.52229	1.74808	2.9374	2.83406					1																		1
	2					0.916507	0.955758	0.288501	3.0993	0.294885	1.38283	1.59447	2.54809	2.7923	2.80904
	3			1.24949	1.46213	1.62037	2.9434	3.05211	2.97783	2.96154	1.55334	1.56122	1.81193	2.60142	2.79832	2.74454
	4		1.07661	1.08644	1.58059	2.03431	2.62427	2.80229	2.79057	2.86224	2.63637	1.72661	1.81028	2.25016	2.55905	2.82199	2.77157
	5	0.901573	1.11634	1.13712	1.49634	1.90493	1.89295	2.36927	2.44807	2.63585	2.43119	2.00267	1.90362	2.04061	2.40787	2.56758	2.86453	2.85428
	6	0.689748	1.03856	1.13376	1.47141	1.98198	1.83163	1.86342	2.18934	2.43084	2.34586	2.22854	2.02988	2.08084	2.3158	2.4733	2.52105	2.85669
	7	0.813883	0.887402	1.09752	1.26846	1.16373	0.819738	0.0245829	2.88077	2.62956	2.86405	2.22984	2.21945	2.22884	2.35377	2.20264	2.0372	1.79362
	8	0.11551	1.99146	2.07791	1.79911	0.740904	0.67875	0.508349	0.135978	2.97135	3.06323	2.85423	2.88597	3.03189	0.931341	2.53287	2.47638	2.57767
	9	1.98179	1.90845	1.83552	1.71019	1.33414	1.12573	0.840133	0.620641	0.215297	0.01119	2.99226	0.0539127	0.27885	0.494631	2.91545	2.9219	3.05488
	10	1.81075	1.84666	1.83959	1.77275	1.86902	1.58999	0.970733	0.765231	0.387886	0.288538	3.06971	0.219449	0.602694	0.45217	3.04075	2.97445	0.0104549
	11	1.76601	1.86891	1.87847	2.06498	2.27139	1.90461	1.09407	0.83017	0.618547	0.483968	0.192625	0.481058	0.841484	0.401483	3.07054	3.01011	3.09009
	12	1.69652	1.81467	1.81828	1.95675	2.31577	2.09843	1.47192	1.01007	0.684385	0.527285	0.341957	0.103375	0.12195	2.48005	2.99573	3.03304	3.03305
	13	1.65002	1.73037	1.78784	1.93452	2.34616	2.39712	1.68281	1.05247	0.666681	0.390583	0.160555	3.1215	2.70164	2.80015	2.98507	3.05145	3.02749
	14		1.58426	1.70516	2.20611	2.57079	2.64438	2.12813	1.05442	0.463161	0.152547	0.0566888	3.0277	2.74374	3.10471	0.382939	0.207742
	15			0.837987	3.05147	2.83065	2.81229	2.5825	1.20827	0.26473	0.0571452	3.08779	3.00267	2.97261	0.0703183	0.697283
	16				3.02965	2.91296	2.84278	2.69625	2.20478	0.289383	0.0939637	3.13081	0.0360013	0.13288	0.287924
	17					3.05346	2.88074	2.73661	2.23696	0.188562	0.100982	3.09094	0.0039103	0.0457599
2	1					1.33268	1.28145	1.37825	1.59622	1.78139	1.96294	2.63299	2.93033	2.90702					2																		2
	2					1.2819	1.19536	0.890131	2.54634	2.27827	2.07208	2.26712	2.5731	2.8471	2.87427
	3			1.41598	1.46612	1.54451	1.94392	2.02763	2.20243	2.19917	2.1632	2.11179	2.27722	2.65739	2.81116	2.796
	4		1.11322	1.23242	1.6379	1.9838	2.02765	2.21736	2.52521	2.62039	2.44366	2.23876	2.21236	2.4491	2.61569	2.80009	2.74486
	5	0.982453	1.06437	1.09491	1.37676	1.83219	2.02833	2.25133	2.40088	2.52616	2.57728	2.45992	2.36375	2.32254	2.52163	2.68413	2.83097	2.80465
	6	0.659957	0.949317	1.17368	1.30417	1.72827	2.18091	2.254	2.41552	2.4869	2.64123	2.66504	2.4488	2.44785	2.46424	2.69455	2.88763	2.80804
	7	0.335649	1.30689	1.03319	1.3396	1.41543	0.610399	2.82788	2.77367	2.71771	2.99948	2.91443	2.62235	2.70767	2.76318	2.59651	2.0855	2.39177
	8	2.79245	2.42935	2.25944	1.94431	1.09365	0.741594	0.377337	0.100592	0.00562208	3.06937	3.06865	3.03299	0.225498	0.251552	2.91729	2.90645	2.82757
	9	2.13715	2.01677	1.93907	1.66389	1.43223	1.31297	0.928713	0.482491	0.222739	0.102848	3.10613	0.157704	0.318335	0.412925	3.1269	3.1118	3.11324
	10	1.85886	1.8481	1.82638	1.81713	1.86991	1.70183	1.12415	0.685824	0.402314	0.286929	3.10342	0.265535	0.695484	0.376876	0.0468122	0.0352485	3.13815
	11	1.75244	1.83364	1.86622	1.98627	2.04951	1.82714	1.21687	0.805225	0.559641	0.487078	0.414814	0.53349	1.20295	0.411887	3.09742	3.03532	3.02397
	12	1.64059	1.75406	1.81353	2.02722	2.18837	2.08642	1.53964	0.960951	0.629302	0.493605	0.474588	0.249129	1.54179	2.69405	3.02355	3.03094	2.96179
	13	1.62909	1.68621	1.76786	2.02958	2.29651	2.29279	1.7671	1.06751	0.59918	0.392387	0.210435	3.13483	2.2733	2.94328	3.0442	3.06712	2.99351
	14		1.4786	1.76119	2.27833	2.51407	2.57223	2.00908	1.08845	0.481555	0.179462	0.103946	0.0198483	3.01189	0.183939	0.223904	0.103686
	15			3.02813	2.8176	2.78943	2.78456	2.51451	1.0297	0.343232	0.108788	0.0218691	0.0092813	0.0968626	0.403371	0.585388
	16				2.96285	2.8967	2.83905	2.71794	2.25843	0.369252	0.168165	0.0808919	0.206694	0.403356	0.588206
	17					3.11055	2.92324	2.82766	2.44468	0.187592	0.20343	0.0333445	0.117614	0.220265
3	1					1.41411	1.37975	1.5135	1.58642	1.66281	1.44378	1.38515	0.00813892	3.09288					3																		3
	2					1.29414	0.859425	0.0287785	2.78195	2.76342	1.7096	1.75014	2.73369	2.93907	2.9072
	3			1.19008	1.48194	1.50758	3.01103	3.00022	2.92974	2.74135	2.22827	1.85247	2.06237	2.6946	2.83808	2.89806
	4		0.919095	1.01805	1.35805	1.7258	2.88622	2.8859	2.85157	2.84391	2.68453	2.12496	2.0691	2.30019	2.64422	2.88617	2.8936
	5	0.828855	0.877488	0.861522	1.14222	1.78611	2.15225	2.75343	2.50429	2.63585	2.41182	2.14828	2.0904	2.13482	2.39298	2.75191	2.9539	2.93882
	6	0.687905	0.841411	0.798435	0.971055	1.89938	2.21524	2.53892	2.33823	2.4215	2.23154	2.21808	2.13264	2.18792	2.2437	2.59118	2.88702	2.7685
	7	0.525094	0.910108	0.775616	1.28544	2.33968	2.63152	2.83832	2.81863	2.67654	2.58174	2.28662	2.19162	2.17115	2.16256	2.13266	1.97835	1.95175
	8	2.77256	2.52004	2.38394	2.05699	1.47485	0.675347	0.366673	0.111116	2.8556	3.02832	2.81832	2.46762	3.02687	0.561472	2.60978	2.51271	2.62396
	9	2.06057	1.9456	1.89027	1.71261	1.36262	1.12472	0.838155	0.533895	0.201701	0.0219109	3.03039	0.109217	0.471255	0.201088	3.11195	2.88807	3.07017
	10	1.846	1.84372	1.82395	1.76902	2.07453	1.69317	0.847952	0.667053	0.436544	0.312785	3.04587	0.566781	0.588467	0.24709	3.05638	3.00595	3.1369
	11	1.78845	1.87382	1.90403	2.06276	2.27386	2.07325	0.889361	0.731005	0.565914	0.555165	0.590114	0.709034	3.07933	0.121448	3.01817	3.00895	3.04206
	12	1.70926	1.82255	1.90808	2.06066	2.27627	2.21454	1.42513	0.92233	0.552377	0.489351	0.314135	3.00184	2.5025	2.82455	2.84529	2.90702	2.96247
	13	1.70833	1.77075	1.90678	2.17942	2.45673	2.4457	1.74669	1.0546	0.480203	0.263418	0.00546041	3.09643	2.86392	2.88963	3.01944	2.95488	2.98156
	14		1.65933	1.70776	2.35649	2.56003	2.61278	2.10139	1.02399	0.325885	0.0329104	0.0214181	3.11275	3.03825	3.1344	0.177383	0.0207577
	15			0.242026	2.98072	2.8256	2.80706	2.53882	1.4248	0.204068	0.0141802	3.10603	3.11916	0.000428357	0.173292	0.471754
	16				3.01367	2.92417	2.85819	2.72124	2.30851	0.320865	0.120306	0.0623391	0.0674824	0.115624	0.269926
	17					0.03213	2.98428	2.84468	2.32816	0.116266	0.144315	0.000344066	0.0167976	0.0540849
4	1					1.22956	1.24666	1.46716	1.48151	1.66448	1.64496	1.73579	3.04966	2.99585					4																		4
	2					1.30623	0.330091	0.172932	2.66804	2.5544	1.6455	1.52397	2.4625	2.94973	2.93849
	3			1.25879	1.27128	2.14047	2.84644	2.93796	2.98431	2.44417	2.04576	1.51397	1.62372	2.69862	2.89615	2.87442
	4		1.06958	1.17557	1.32714	2.5468	2.88013	2.96991	2.8352	2.77	2.61506	2.08944	1.88476	2.12044	2.67448	2.86734	2.95288
	5	0.987093	1.16957	1.09642	1.35733	1.81908	1.91793	2.68147	2.50405	2.61981	2.53961	2.26147	1.86708	1.88267	2.36205	2.80186	2.93479	3.0062
	6	0.916952	1.06532	1.22138	1.35326	1.7652	1.84762	1.91823	2.17902	2.39786	2.49132	2.44639	2.19344	2.07315	2.20704	2.69028	2.99817	3.04012
	7	1.13213	1.37849	1.2195	1.55823	1.21446	0.46596	2.5816	2.60271	2.56543	2.54803	2.25886	2.17279	2.14132	1.86045	1.83718	1.81473	1.59408
	8	1.68778	1.79903	1.70752	1.81964	1.14938	0.902447	3.03959	3.00638	2.95456	2.89727	2.61331	2.39126	2.50612	1.36713	2.02265	2.20004	2.69688
	9	2.04694	1.93806	1.82646	1.6124	1.0799	1.57173	0.456274	0.416312	0.169183	3.04654	2.81829	2.79315	0.415207	0.817708	0.312186	0.0926413	3.05093
	10	1.90463	1.874	1.79922	1.81546	2.04021	2.0546	2.37678	0.551621	0.367572	0.163553	2.55522	2.73441	0.519246	0.318384	0.116398	0.0466923	3.14108
	11	1.76249	1.85644	1.94835	2.09776	2.34361	2.33737	1.69866	0.847355	0.537709	0.426564	2.70229	2.94063	2.19982	2.80368	2.91222	2.96662	3.00859
	12	1.67702	1.75376	1.87597	2.10369	2.34113	2.19033	1.66075	0.914847	0.554365	0.405333	0.0293765	2.90854	2.22439	2.43407	2.5306	2.83574	2.85291
	13	1.59213	1.70791	1.74124	2.08813	2.40227	2.29264	1.78015	1.06337	0.535992	0.203055	3.05334	2.95289	2.70439	2.53669	2.36688	2.61399	2.62202
	14		1.42991	1.44857	2.43652	2.50111	2.51528	2.00108	1.07792	0.417199	0.0993002	3.12107	3.03751	2.87153	2.86975	2.38193	2.73334
	15			0.17814	2.94744	2.78294	2.78513	2.44347	1.33899	0.326446	0.0564398	3.09444	3.01291	2.98233	3.0466	0.526038
	16				2.97744	2.83732	2.79303	2.6418	2.00486	0.402779	0.124288	0.0133445	3.12608	0.00455747	0.0643948
	17					3.07462	2.91343	2.82447	2.29999	0.244329	0.14499	3.09589	3.10485	3.07257
5	1					1.17134	1.22418	1.37885	1.56848	1.76799	1.70549	2.83193	3.06391	2.98843					5																		5
	2					1.0886	0.900771	0.58636	2.46308	2.07522	1.90229	2.07542	2.80127	2.8784	2.88748
	3			1.26275	1.22336	0.679981	3.11917	0.167364	2.8817	2.19133	1.95452	1.94734	2.3313	2.77383	2.82633	2.8315
	4		1.06887	1.07346	1.21864	2.43079	0.0356704	3.09446	2.86484	2.72568	2.39542	2.12213	2.03465	2.48854	2.71177	2.84685	2.91299
	5	0.956201	1.04297	0.997874	1.1871	1.64162	1.90665	2.79712	2.4918	2.62615	2.63211	2.43899	2.15547	2.26457	2.57563	2.81694	3.02044	0.0239857
	6	0.770728	0.941024	0.961026	1.14942	1.56925	2.09863	2.30874	2.29784	2.4556	2.41438	2.37593	2.28723	2.28376	2.36473	2.69234	3.05196	0.0972016
	7	0.698424	1.18603	0.803267	2.49639	2.91987	2.64566	2.85889	2.65024	2.6023	2.8874	2.71344	2.37335	2.27322	2.36325	1.98896	1.73829	1.76316
	8	2.93605	2.33104	2.27811	2.09569	1.42345	0.858794	0.238716	0.0641072	3.02613	2.91102	2.95303	2.81808	2.40068	0.916517	2.43273	2.54429	2.74782
	9	2.01691	1.93673	1.8631	1.80707	1.33251	1.18632	0.710724	0.502584	0.244016	0.00986774	3.04948	0.0928788	0.622297	0.636755	2.99715	3.00024	3.07723
	10	1.80847	1.85563	1.90473	1.88654	2.03804	1.64348	0.879972	0.699078	0.519389	0.350096	2.81043	0.0797907	0.794616	0.710799	3.05991	3.00061	3.1062
	11	1.721	1.7967	1.76591	2.04308	2.29045	2.10902	1.15678	0.872384	0.617725	0.629953	0.23959	0.936365	1.58147	1.58097	2.93671	2.95929	2.95499
	12	1.57681	1.70032	1.775	2.03202	2.24437	2.16399	1.4284	0.948171	0.642583	0.491074	0.134306	2.78962	1.73157	2.25765	2.58634	2.8291	2.75317
	13	1.49203	1.56288	1.63712	1.77319	2.47954	2.41071	1.82085	1.04146	0.509148	0.201595	3.06254	2.9647	2.38141	2.42227	2.38317	2.72105	2.63689
	14		1.25944	1.32122	2.69512	2.71247	2.72576	2.32246	1.12836	0.296943	0.0713183	3.05226	3.0075	2.73723	2.97484	1.21739	0.414281
	15			0.228319	3.09657	2.92911	2.89142	2.68516	2.43993	0.163364	0.0343603	3.07671	3.01659	2.98268	3.1233	0.959472
	16				3.05309	2.99608	2.89877	2.73933	2.40098	0.170444	0.0845549	0.00567301	0.0138902	3.12779	0.0435404
	17					0.0269752	2.93508	2.82266	2.37474	0.0748612	0.136482	3.08407	3.07817	3.04515
6	1					1.17754	1.25457	1.39789	1.63098	1.93439	2.12147	2.57863	2.96527	2.93398					6																		6
	2					1.21165	0.946403	0.607199	2.74791	2.5308	2.29219	2.27282	2.62915	2.79008	2.85711
	3			1.20963	1.58382	1.44176	0.64092	0.327543	0.0318543	2.47408	2.33553	2.24191	2.32498	2.63135	2.83581	2.82731
	4		0.901246	0.938938	1.39872	1.77385	0.439801	0.13776	2.88703	2.71069	2.56122	2.33212	2.23375	2.36221	2.6037	2.85346	2.87346
	5	0.787857	0.875624	0.87323	1.25236	1.78821	1.98004	2.688	2.55127	2.7394	2.58781	2.44259	2.20246	2.26325	2.40943	2.63586	2.85201	2.95698
	6	0.616963	0.812335	0.826415	1.23806	1.92573	2.09077	2.44121	2.28283	2.49952	2.69724	2.63666	2.28134	2.23227	2.25431	2.36344	2.47981	2.87655
	7	0.277949	0.341271	0.283236	0.521254	2.74356	0.150759	3.01767	2.88748	2.72483	3.11786	2.89265	2.58827	2.30519	2.20036	2.18772	2.11747	2.13151
	8	2.92304	2.76105	2.63294	2.17681	1.21927	0.67147	0.323488	0.131985	3.02712	3.09225	3.07254	2.95041	2.72234	2.32652	2.50894	2.64665	2.81554
	9	2.13026	1.9826	1.92298	1.76353	1.61489	1.39007	0.730021	0.39276	0.20814	0.0477889	3.0947	0.0323075	0.111044	0.113987	3.03389	3.06465	0.00957849
	10	1.86796	1.89117	1.85014	1.87076	1.99729	1.95813	1.1406	0.665492	0.365575	0.27711	3.1082	0.158998	0.576201	0.293281	3.12294	3.07496	0.0175771
	11	1.76002	1.82237	1.82632	1.95991	2.12948	2.17922	1.12042	0.792903	0.463593	0.468811	0.408113	0.439612	2.99626	0.262278	3.08273	3.08865	3.08005
	12	1.67798	1.74037	1.79805	1.99977	2.23292	2.18744	1.43446	0.929293	0.572235	0.432473	0.3243	3.02936	2.51534	2.89189	3.02846	3.04285	2.97765
	13	1.53292	1.6088	1.69649	2.15297	2.51448	2.48927	1.83896	1.03536	0.5469	0.273177	0.086988	0.022266	2.92063	3.02524	0.0881154	3.00479	3.00234
	14		0.997664	1.04788	2.79615	2.7884	2.80553	2.25359	1.1325	0.358007	0.0984612	0.0217938	0.00383306	3.1415	0.209317	0.498689	0.244471
	15			0.385282	0.0324152	2.96261	2.91369	2.73195	1.9436	0.274632	0.0605901	3.09832	0.00727898	0.0376058	0.255356	0.689734
	16				3.13381	3.01724	2.92185	2.76632	2.33279	0.301674	0.126174	0.0158063	0.099285	0.172347	0.309725
	17					0.0209664	2.9637	2.82551	2.39704	0.139048	0.146811	3.13789	3.13233	3.125
7	1					1.28926	1.38597	1.47045	1.61597	1.83866	1.99936	2.82793	3.0429	2.94772					7																		7
	2					1.24285	1.44995	3.03235	2.50366	2.67878	1.99984	2.18405	2.72164	2.81834	2.79989
	3			1.23038	1.42068	1.62752	2.16455	2.3986	2.5542	2.3832	2.1487	2.07606	2.30115	2.57845	2.82179	2.78248
	4		0.99368	1.03009	1.43105	1.84093	2.10798	2.66665	2.68993	2.58982	2.40939	2.21276	2.17091	2.28334	2.65121	2.87212	2.83548
	5	0.811446	0.997344	0.939859	1.19861	1.77783	1.82515	2.37831	2.51823	2.50721	2.51126	2.33963	2.14075	2.23039	2.3676	2.56726	2.91101	2.87931
	6	0.623946	0.842924	0.852333	1.22324	1.75666	2.00869	2.28313	2.31202	2.4661	2.49834	2.40628	2.22383	2.18485	2.21991	2.47658	2.89425	2.97016
	7	0.305927	0.599627	0.505705	2.03912	1.53486	0.733271	0.0137927	2.88942	2.70025	2.75072	2.56452	2.36047	2.22102	2.22185	2.1006	2.00709	1.88079
	8	2.66345	2.4738	2.26834	2.07999	1.17758	1.00039	0.40511	0.226731	3.01366	3.02491	2.87495	2.81359	2.46991	1.30525	2.84581	2.78746	2.8429
	9	2.07348	1.93549	1.86646	1.71789	1.54542	1.34525	0.91718	0.5277	0.159488	0.0319594	2.98102	3.00875	0.462547	0.588382	0.0711884	0.0624892	0.0351346
	10	1.85851	1.8515	1.85129	1.74829	2.00017	1.73909	1.16058	0.719505	0.390885	0.319614	3.02467	0.196775	0.756901	0.453392	0.213409	0.0589654	0.0529302
	11	1.71012	1.72898	1.76397	1.89462	2.04879	2.04493	1.28895	0.860528	0.569772	0.560541	0.579769	0.448279	0.98677	0.391494	0.0692253	3.08301	3.07073
	12	1.6659	1.63392	1.7125	1.84986	2.09546	2.06045	1.52104	0.984461	0.617865	0.466112	0.323572	2.9791	1.50458	0.00493914	0.0311088	3.05882	2.95833
	13	1.56535	1.51612	1.61362	1.92165	2.48131	2.31736	1.73579	1.05182	0.566412	0.332759	0.0984384	3.12846	2.5415	3.0039	0.14285	3.06273	2.98365
	14		1.23201	1.6027	2.58778	2.61401	2.62517	2.07217	1.11188	0.406139	0.144176	0.0914413	3.08587	2.89707	0.331098	0.5624	0.335382
	15			0.210198	2.88705	2.82844	2.79056	2.50592	1.44772	0.306781	0.0811638	0.0030972	3.08657	0.00185564	0.398962	0.739579
	16				2.93615	2.85236	2.78824	2.59051	1.94067	0.403536	0.143637	0.0409047	0.0614307	0.19987	0.411129
	17					3.07213	2.88051	2.74918	2.19785	0.186863	0.185015	3.13006	0.0132193	3.13101
8	1					1.34792	1.31596	1.5292	1.70864	1.92336	1.97915	2.21261	2.93032	2.94733					8																		8
	2					1.24268	0.793892	0.0472676	2.70292	2.58251	2.0291	2.08028	2.51122	2.83812	2.87973
	3			1.26635	1.66192	2.02299	2.7075	2.81895	2.72884	2.60819	2.04388	1.92151	2.08582	2.6495	2.82819	2.89238
	4		1.0191	1.14349	1.46267	2.13375	2.67895	2.9199	2.82306	2.69089	2.33691	1.99262	2.02335	2.34448	2.64736	2.96016	2.98001
	5	0.863739	0.96187	0.985637	1.14292	1.66066	1.89144	2.73952	2.50724	2.66407	2.52114	2.19649	2.05404	2.14512	2.40989	2.75801	3.07221	0.0219501
	6	0.692792	0.78918	0.908093	0.917324	1.87577	1.91297	2.14182	2.23773	2.43084	2.60084	2.3548	2.15644	2.18257	2.36351	2.6509	3.05668	3.1121
	7	0.409411	0.479787	0.266489	0.0561814	2.7294	2.49047	2.98689	2.7427	2.72617	2.84093	2.51235	2.34672	2.36379	2.23472	2.38147	2.06219	2.03893
	8	3.06844	2.70292	2.34055	2.08836	1.53696	0.954485	0.281908	0.0142958	2.98831	3.04044	2.96136	2.99706	0.34349	0.443643	2.81622	2.77933	2.72391
	9	2.09961	1.98631	1.81018	1.63365	1.61404	1.58889	1.15201	0.616396	0.120358	3.13676	3.04687	0.275401	0.545662	0.331197	3.10714	3.09494	3.13385
	10	1.87868	1.85544	1.84187	1.77764	1.99885	1.91853	1.46578	0.835737	0.388136	0.271538	0.00433004	0.413482	0.630565	0.281464	0.0849481	0.00965496	0.0272017
	11	1.77629	1.82148	1.8287	1.84276	2.04901	2.04622	1.56741	1.0092	0.463677	0.411062	0.266001	0.188638	0.754201	0.0317863	0.0402433	3.06398	3.02006
	12	1.70833	1.74268	1.76198	1.96501	2.09601	2.08927	1.53922	1.00712	0.554247	0.386283	0.0800106	2.95493	2.81781	2.62187	2.8721	2.87918	2.81939
	13	1.62565	1.66155	1.71479	1.98244	2.37785	2.35557	1.79736	1.06184	0.414467	0.237135	0.00756265	3.02795	2.7098	2.77503	2.77699	2.6911	2.76305
	14		1.0972	0.56233	2.81759	2.76388	2.77792	2.31028	0.972686	0.291439	0.0785164	3.1276	3.07002	2.86714	3.03968	0.511889	2.98281
	15			0.20204	0.0665623	2.97537	2.90558	2.70899	2.65801	0.163311	0.0282082	3.08425	3.09928	3.03886	0.0777333	0.881484
	16				3.02949	2.94912	2.88392	2.75877	2.46279	0.16733	0.0979769	3.12634	0.0536651	0.0520675	0.132703
	17					0.00410618	2.9323	2.80812	2.4356	0.0192169	0.0944964	3.08761	3.12347	3.1103
9	1					1.28486	1.43451	1.56793	1.64896	1.75812	1.83365	2.10574	2.96634	2.9282					9																		9
	2					1.24604	0.227445	3.13855	2.87368	2.75925	1.87159	1.87472	2.4269	2.75097	2.81193
	3			1.21089	1.48175	1.19463	2.861	2.93655	2.92399	2.37494	1.94685	1.8734	2.15319	2.50514	2.77406	2.73402
	4		0.957771	0.9283	1.35561	1.42557	2.9196	3.0378	2.97917	2.50522	2.0312	1.96047	2.04807	2.29998	2.55229	2.8327	2.79956
	5	0.795651	0.880467	0.794647	1.10752	1.70098	2.1075	2.79135	2.54024	2.50676	2.31265	2.18667	2.07596	2.19453	2.52325	2.68541	2.87557	2.87121
	6	0.584424	0.803776	0.819483	1.21202	1.66227	2.3017	2.53876	2.48272	2.46014	2.50558	2.2448	2.2319	2.25748	2.54338	2.66752	2.83246	3.01687
	7	0.254977	0.509672	0.456053	1.30312	0.951169	0.593471	2.95169	2.77748	2.67213	2.79392	2.70054	2.49291	2.31786	3.04352	2.352	2.10996	2.18257
	8	2.88748	2.63494	2.45302	2.06703	1.1354	0.746776	0.463748	0.212541	3.01437	3.08889	3.06782	3.01177	0.48586	0.344894	2.91947	2.81863	2.68077
	9	2.07459	1.93816	1.8998	1.74254	1.64832	1.26739	0.935514	0.673848	0.221961	0.0182098	2.98784	0.0166689	0.650602	0.395775	0.0566886	0.0670988	3.11966
	10	1.83429	1.84395	1.86054	1.81517	2.20278	1.90104	1.15618	0.8809	0.502188	0.363934	3.07225	0.39017	0.869442	0.5174	0.0373031	0.0198576	0.0134085
	11	1.72291	1.7522	1.77485	1.90166	2.17376	2.18419	1.11172	0.845546	0.530386	0.465731	0.52309	0.110147	1.5159	0.405252	3.07734	2.9911	3.01083
	12	1.63693	1.61863	1.62948	1.84133	2.13436	2.03289	1.39253	0.938335	0.574938	0.351144	0.116049	3.12272	2.25037	2.44555	2.85965	2.81821	2.84185
	13	1.45167	1.36174	1.48849	1.95869	2.51247	2.54669	1.69235	1.00376	0.466568	0.223705	0.0539304	3.07603	2.50427	2.55284	3.04652	2.81316	2.80562
	14		0.643861	0.664385	3.04007	2.83759	2.85588	2.34251	0.875408	0.343439	0.0913418	3.13192	3.02405	2.79154	0.118939	0.537731	0.110408
	15			0.352367	0.0644442	2.97805	2.91951	2.74321	3.03921	0.226347	0.0726851	3.09368	3.01838	2.93916	0.264295	0.759441
	16				3.10646	3.0175	2.88618	2.74231	2.55136	0.182795	0.110816	3.11974	3.13794	3.13682	0.158116
	17					3.1104	2.90475	2.78329	2.43049	0.0656757	0.112431	3.08136	3.06054	3.02409
10	1					1.29238	1.32371	1.45632	1.6024	1.77066	1.8639	3.0915	3.12841	3.03129					10																		10
	2					1.22112	1.21404	2.87531	2.45157	2.31105	1.95879	1.71232	2.86102	2.91834	2.9105
	3			1.20377	1.33445	1.72506	2.51401	2.55499	2.58558	2.31913	2.11227	1.77626	2.32579	2.70605	2.84457	2.83751
	4		0.957219	0.99549	1.25513	1.92078	2.5047	2.64669	2.60664	2.56282	2.36897	2.0334	2.01723	2.28924	2.69059	2.87622	2.92018
	5	0.815734	0.882253	0.871169	1.12127	1.70688	1.88148	2.5074	2.50928	2.5151	2.41489	2.26328	2.02528	2.07068	2.50884	2.59295	3.00304	0.00325792
	6	0.700327	0.872294	0.931616	1.21005	1.84437	2.04119	2.77084	2.36899	2.4083	2.45824	2.31532	2.18947	2.08523	2.24438	2.1379	2.25126	2.82623
	7	0.460334	0.63445	0.556649	2.88553	0.156386	0.177537	0.19456	2.89478	2.67641	2.86669	2.61052	2.33489	2.13663	2.09222	1.82752	1.72706	1.64599
	8	3.10188	2.69361	2.38551	1.94477	0.905317	0.883712	0.600707	0.433757	3.0036	3.08536	3.00248	2.80079	2.64287	0.931947	2.45549	2.53593	2.44955
	9	2.02793	1.94121	1.89358	1.7493	1.41061	1.32544	0.835134	0.684576	0.260449	0.0572862	3.11073	0.129563	0.528163	0.459827	3.07853	3.07586	3.1115
	10	1.82803	1.82296	1.83445	1.86037	1.97663	1.82883	1.12091	0.804093	0.390788	0.434508	0.220945	0.336104	0.615601	0.413587	3.11775	3.02617	0.008419
	11	1.72718	1.76612	1.759	1.92531	2.17506	2.00795	1.34432	0.895528	0.604709	0.567289	0.633619	0.511206	0.82241	3.0922	2.90949	2.96202	2.95442
	12	1.59949	1.63427	1.67875	1.82381	2.14927	2.09448	1.53297	1.01669	0.593708	0.412657	0.232986	3.10615	2.61128	2.49531	2.78428	2.86323	2.825
	13	1.49757	1.50708	1.58595	1.95802	2.5604	2.45482	1.83505	1.11828	0.528	0.266186	0.0897733	3.0812	2.72846	2.7083	2.87356	2.85563	2.75787
	14		1.30971	1.24591	2.97233	2.81526	2.79626	2.39182	1.02926	0.343161	0.112533	3.1397	3.09431	2.95602	0.0311305	0.382043	0.0416835
	15			0.366937	0.0170146	2.96302	2.89375	2.69532	0.00356885	0.263109	0.0551419	3.09649	3.07599	0.0140867	0.169939	0.761153
	16				3.04091	2.96675	2.88037	2.75845	2.45031	0.248909	0.118667	0.00159638	0.0220888	0.0397221	0.139516
	17					3.13405	2.93251	2.84311	2.46487	0.158126	0.127263	0.00321306	3.124	3.05751
