# Supplementary material for: Stationary Atrial Fibrillation Properties in the Goat Do Not Entail Stable or Recurrent Conduction Patterns
Source: Front Physiol. 2018 Jul 27;9:947. doi: 10.3389/fphys.2018.00947 (PMC6072874; doi:10.3389/fphys.2018.00947)
Supplement: Supplementary file 1 [file Data_Sheet_1.ZIP › Goat_4_Property maps.xlsx]

## Sheet: AFCL
AFCL
Signals of insufficient quality were excluded from the property maps. Signals could be rejected based on noise low amplitude, large artefact or ventricluar farfields that could not be substracted.
		1	2	3	4	5	6	7	8	9	10	11	12	13	14	15	16	17
1	1					0.137632	0.138595	0.137632	0.14052	0.138595	0.141963	0.143407	0.147257	0.14052					1																		1
	2					0.13667	0.137632	0.137632	0.141482	0.14052	0.141482	0.143407	0.148219	0.141482	0.142445
	3			0.13667	0.135707	0.13667	0.138595	0.140038	0.14052	0.142445	0.14437	0.14437	0.14437	0.139557	0.14437	0.14437
	4			0.13667	0.134745	0.133782	0.14052	0.142445	0.145332	0.146295	0.145332	0.14052	0.142445	0.14052	0.141482	0.14437	0.143407
	5		0.141482	0.134745	0.133782	0.137632	0.14052	0.143407	0.146295	0.146295	0.143407		0.143407	0.142445	0.142445	0.145332	0.145332	0.135707
	6	0.142445	0.138595	0.133782	0.133782	0.137632	0.142445	0.148701	0.149182	0.147257	0.14437	0.145332	0.145332	0.142445	0.141482	0.143407	0.141482	0.137632
	7	0.14052	0.135707	0.131858	0.134745	0.139557	0.14052	0.150144	0.147257	0.150144	0.148219	0.147257	0.147257	0.143407	0.14052	0.14052	0.14052	0.14052
	8	0.14052	0.138114	0.135707	0.134745	0.14052	0.142445	0.145332	0.149182	0.149663	0.146295	0.143407	0.142445	0.143407	0.14052	0.139557	0.139557	0.139557
	9	0.141001	0.139557	0.13667	0.134745	0.137632	0.139557	0.141963	0.148219	0.148219	0.14437	0.142445	0.141963	0.139557	0.138595	0.13667	0.139557	0.14052
	10	0.141482	0.14052	0.133782	0.130895	0.133782	0.137632	0.142445	0.14437	0.145332	0.143407	0.141482	0.141482	0.138595	0.135707	0.135707	0.139557	0.137632
	11	0.138595	0.135707	0.130895	0.13282	0.13282	0.134745	0.142445	0.143407	0.139076	0.14437	0.143407	0.142445	0.135707	0.135707	0.13667	0.138595	0.13667
	12	0.141963	0.13667	0.13282	0.14052	0.139557	0.13667	0.139557	0.142445	0.14052	0.141482	0.143407	0.139557	0.135707	0.135707	0.137632	0.137632	0.13667
	13	0.143888	0.137632	0.138595	0.141482	0.141482	0.141482	0.141001	0.143407	0.139557	0.137632	0.14052	0.141482	0.137632	0.139557	0.138595	0.138595	0.138595
	14		0.13667	0.134745	0.133782	0.139557	0.14052	0.14437	0.142445	0.138595	0.138595	0.14052	0.145332	0.142445	0.137632	0.138595
	15			0.13667	0.13667	0.137632	0.139557	0.141482	0.143407	0.139557	0.138595	0.139557	0.142445	0.141482	0.138595	0.138595
	16				0.138595	0.137632	0.137632	0.139557	0.143407	0.141001	0.139557	0.139557	0.139557	0.139557	0.141482
	17					0.14052	0.14052	0.141482	0.146295	0.14437	0.141482	0.139557	0.14052	0.141482
2	1					0.138595	0.137151	0.138595	0.14052	0.14052	0.14437	0.143407	0.147257	0.142445					2																		2
	2					0.135707	0.138595	0.138595	0.142445	0.14052	0.14437	0.14437	0.147257	0.142445	0.143407
	3			0.137632	0.135707	0.135707	0.137632	0.138595	0.142445	0.143407	0.143407	0.146295	0.146295	0.14052	0.143888	0.143407
	4			0.137632	0.134745	0.134745	0.138595	0.142445	0.14437	0.145332	0.143407	0.139557	0.142445	0.142445	0.143407	0.146295	0.14437
	5		0.143407	0.136189	0.134745	0.137632	0.141482	0.142445	0.147257	0.146295	0.143407		0.143407	0.142445	0.142445	0.143407	0.145332	0.137632
	6	0.14052	0.13667	0.134745	0.133782	0.139557	0.141482	0.147257	0.148219	0.150144	0.145813	0.14437	0.142926	0.141001	0.14052	0.142445	0.142445	0.137632
	7	0.139557	0.135707	0.133782	0.135707	0.139557	0.145813	0.148219	0.149182	0.150144	0.148219	0.146295	0.14437	0.142445	0.139557	0.141482	0.139557	0.139557
	8	0.141482	0.137632	0.13667	0.135707	0.14052	0.14052	0.14437	0.151107	0.148219	0.147257	0.14437	0.143407	0.142445	0.141482	0.139557	0.14052	0.14052
	9	0.138595	0.14052	0.135707	0.134745	0.13667	0.141001	0.142445	0.145332	0.146295	0.142445	0.14052	0.14052	0.14052	0.138595	0.13667	0.139557	0.141482
	10	0.138595	0.141482	0.133782	0.133782	0.133782	0.137632	0.143407	0.14437	0.142445	0.141482	0.139557	0.139557	0.139557	0.135707	0.135707	0.139557	0.138595
	11	0.14052	0.137151	0.13282	0.13282	0.131858	0.134745	0.145332	0.141482	0.138595	0.145332	0.142445	0.14052	0.13667	0.134745	0.13667	0.139557	0.138595
	12	0.14052	0.135707	0.133301	0.139557	0.139557	0.13667	0.143407	0.142926	0.137632	0.14052	0.143407	0.138114	0.134264	0.135707	0.139557	0.139557	0.138595
	13	0.145332	0.138114	0.139557	0.14052	0.140038	0.143407	0.141482	0.14052	0.138595	0.138595	0.141482	0.143407	0.137632	0.14052	0.139557	0.139557	0.139557
	14		0.139557	0.13667	0.133782	0.138595	0.141482	0.145332	0.142445	0.138595	0.138595	0.138595	0.14437	0.143407	0.14052	0.139557
	15			0.137632	0.13282	0.13667	0.138595	0.141482	0.143407	0.138595	0.137151	0.138595	0.14052	0.14437	0.14052	0.14052
	16				0.13667	0.135707	0.134745	0.137632	0.143888	0.14052	0.138595	0.138595	0.139557	0.14052	0.142445
	17					0.138595	0.137632	0.138595	0.147257	0.144851	0.142445	0.14052	0.14052	0.142445
3	1					0.137632	0.138595	0.139557	0.142445	0.141482	0.143407	0.14437	0.149182	0.141482					3																		3
	2					0.135707	0.138114	0.140038	0.142445	0.141482	0.142926	0.146295	0.150144	0.143888	0.14437
	3			0.13667	0.135707	0.135707	0.138595	0.139557	0.142445	0.142445	0.143407	0.146295	0.146295	0.141482	0.14437	0.143407
	4			0.13667	0.133782	0.134745	0.138595	0.142445	0.143407	0.145332	0.143407	0.138595	0.14437	0.142445	0.143407	0.142445	0.14437
	5		0.14052	0.135707	0.133782	0.13667	0.142445	0.143407	0.14437	0.14437	0.14052		0.143407	0.143407	0.14052	0.14437	0.146295	0.135707
	6	0.142445	0.139557	0.135226	0.134745	0.138595	0.141482	0.148219	0.147257	0.145332	0.14437	0.145332	0.145332	0.139557	0.14052	0.14052	0.14052	0.13667
	7	0.14052	0.137632	0.133782	0.135707	0.139557	0.142445	0.150144	0.150144	0.148219	0.147257	0.145332	0.146776	0.141482	0.137632	0.139557	0.137632	0.139557
	8	0.139557	0.139557	0.135707	0.13667	0.143407	0.142926	0.143407	0.147257	0.149182	0.146295	0.142445	0.142445	0.14052	0.138595	0.137632	0.138595	0.138595
	9	0.14052	0.142445	0.137632	0.135707	0.138595	0.141482	0.142445	0.145332	0.148219	0.143407	0.14052	0.141482	0.139557	0.137632	0.134745	0.13667	0.137632
	10	0.141482	0.143407	0.13667	0.13282	0.133782	0.138595	0.143407	0.142445	0.143407	0.141482	0.139557	0.139557	0.137632	0.134745	0.13282	0.13667	0.135707
	11	0.142445	0.139557	0.133782	0.131858	0.133301	0.135707	0.143407	0.141482	0.139557	0.14437	0.141482	0.14052	0.135707	0.133782	0.133782	0.134745	0.134745
	12	0.145332	0.13667	0.134745	0.141482	0.142445	0.138595	0.143407	0.143407	0.141482	0.142445	0.141963	0.137632	0.133782	0.133782	0.135707	0.135707	0.133782
	13	0.147257	0.139557	0.139557	0.141482	0.142445	0.143407	0.141482	0.144851	0.141482	0.139557	0.142445	0.14052	0.135707	0.13667	0.13667	0.13667	0.135707
	14		0.14437	0.14052	0.137632	0.14052	0.142445	0.147257	0.14437	0.139557	0.139557	0.141482	0.143407	0.14052	0.13667	0.135707
	15			0.141482	0.137632	0.138595	0.14052	0.143407	0.145332	0.14052	0.139557	0.14052	0.142445	0.14437	0.13667	0.13667
	16				0.141482	0.139557	0.139557	0.139557	0.14437	0.142445	0.141482	0.141482	0.141482	0.141482	0.138595
	17					0.14052	0.141482	0.141482	0.146776	0.148219	0.14437	0.142445	0.142445	0.142445
4	1					0.134745	0.13667	0.137632	0.14437	0.141482	0.147257	0.146295	0.148219	0.142445					4																		4
	2					0.133782	0.137632	0.139076	0.143407	0.141963	0.14437	0.145332	0.149182	0.14437	0.14437
	3			0.133782	0.13282	0.133782	0.13667	0.14052	0.143407	0.143407	0.143407	0.14437	0.145332	0.14052	0.14437	0.143407
	4			0.134745	0.13282	0.13282	0.139557	0.142445	0.14437	0.145332	0.14437	0.139557	0.142445	0.141482	0.143407	0.146295	0.14437
	5		0.143407	0.135707	0.133782	0.134745	0.143407	0.143407	0.145332	0.145332	0.142445		0.143407	0.14052	0.139557	0.14437	0.143407	0.134745
	6	0.141482	0.137632	0.134745	0.133782	0.138114	0.142445	0.148219	0.147257	0.148219	0.145332	0.14437	0.145332	0.14052	0.139557	0.141482	0.139557	0.13667
	7	0.142445	0.13667	0.134745	0.13282	0.138595	0.143407	0.147257	0.149182	0.149182	0.147257	0.146295	0.14437	0.141482	0.13667	0.14052	0.137632	0.138595
	8	0.141001	0.138595	0.137632	0.134745	0.138595	0.14052	0.142445	0.151107	0.148219	0.146295	0.143407	0.143407	0.14052	0.138595	0.13667	0.13667	0.137632
	9	0.14052	0.142445	0.138595	0.133782	0.137632	0.140038	0.141482	0.148219	0.146295	0.141482	0.14052	0.14052	0.139557	0.13667	0.133301	0.136189	0.137632
	10	0.14052	0.143407	0.133782	0.131858	0.133782	0.137632	0.142445	0.142445	0.141482	0.14052	0.14052	0.139557	0.137632	0.133782	0.13282	0.137632	0.13667
	11	0.142445	0.137632	0.131858	0.131858	0.129933	0.13282	0.142445	0.142445	0.138595	0.14437	0.141482	0.141482	0.134745	0.13282	0.134745	0.13667	0.136189
	12	0.141482	0.135707	0.133782	0.142445	0.141963	0.137151	0.14052	0.14437	0.139076	0.14052	0.143407	0.137632	0.133782	0.134745	0.13667	0.13667	0.135707
	13	0.14052	0.138595	0.138595	0.141482	0.141482	0.142445	0.14052	0.14437	0.139557	0.137632	0.14052	0.14052	0.135707	0.137632	0.13667	0.13667	0.137632
	14		0.139076	0.137632	0.135707	0.138595	0.142445	0.146295	0.143407	0.138595	0.138595	0.139557	0.14437	0.139557	0.137632	0.13667
	15			0.137632	0.13667	0.137632	0.141001	0.14437	0.143407	0.138595	0.137632	0.139076	0.142445	0.143407	0.13667	0.136189
	16				0.138595	0.139557	0.140038	0.139557	0.14437	0.141001	0.139557	0.139557	0.139557	0.14052	0.142445
	17					0.141482	0.14052	0.141482	0.147257	0.145332	0.141482	0.14052	0.14052	0.141482
5	1					0.135707	0.138595	0.138595	0.145332	0.142445	0.144851	0.145332	0.148219	0.142445					5																		5
	2					0.13667	0.138114	0.14052	0.144851	0.143407	0.145332	0.145813	0.147257	0.142445	0.145332
	3			0.135707	0.133782	0.133301	0.13667	0.14052	0.145332	0.14437	0.145332	0.146295	0.143407	0.139557	0.145332	0.14437
	4			0.138595	0.134745	0.13282	0.137632	0.14437	0.146295	0.146295	0.145332	0.139557	0.141482	0.14052	0.142445	0.14437	0.143407
	5		0.141482	0.135707	0.133782	0.137632	0.141482	0.146295	0.148219	0.147257	0.144851		0.143407	0.141482	0.142445	0.143407	0.14437	0.138114
	6	0.141482	0.13667	0.134745	0.13282	0.139557	0.14437	0.150144	0.148219	0.150144	0.145332	0.142926	0.142445	0.142445	0.14052	0.143407	0.139557	0.139557
	7	0.14052	0.135707	0.132339	0.13282	0.14052	0.145332	0.150144	0.149182	0.150144	0.146295	0.14437	0.145332	0.141482	0.139557	0.139557	0.138595	0.14052
	8	0.138595	0.138595	0.135707	0.13667	0.14052	0.141482	0.14437	0.151107	0.150144	0.146295	0.143407	0.143407	0.141482	0.138595	0.137632	0.139557	0.139557
	9	0.138595	0.14052	0.136189	0.133782	0.13667	0.138595	0.143407	0.147257	0.148219	0.142445	0.141482	0.141482	0.14052	0.13667	0.133782	0.13667	0.138595
	10	0.137632	0.143407	0.134745	0.131858	0.131858	0.13667	0.143888	0.14437	0.14437	0.14052	0.14052	0.14052	0.139557	0.133782	0.134745	0.137632	0.13667
	11	0.138595	0.138595	0.131858	0.131858	0.131858	0.131858	0.14437	0.14052	0.138595	0.143888	0.142445	0.141482	0.135707	0.133782	0.134745	0.137632	0.13667
	12	0.141963	0.135707	0.13282	0.138595	0.138595	0.13667	0.137632	0.143407	0.137632	0.139557	0.142445	0.138595	0.134745	0.133782	0.137632	0.137151	0.13667
	13	0.143407	0.13667	0.137632	0.138595	0.138595	0.14052	0.14052	0.142445	0.139557	0.138595	0.14052	0.142445	0.134745	0.137632	0.137632	0.13667	0.13667
	14		0.139557	0.13667	0.134745	0.138595	0.14052	0.143407	0.141963	0.139557	0.139557	0.139557	0.142445	0.141482	0.137632	0.13667
	15			0.137632	0.135707	0.135707	0.137632	0.141482	0.142445	0.138595	0.138595	0.138595	0.141482	0.142926	0.13667	0.135707
	16				0.137632	0.137632	0.138595	0.138595	0.14437	0.141482	0.139557	0.139557	0.14052	0.141482	0.139557
	17					0.138595	0.138595	0.141482	0.146295	0.143407	0.142445	0.139557	0.139557	0.141482
6	1					0.137632	0.138595	0.139557	0.142445	0.143407	0.145332	0.14437	0.146295	0.143407					6																		6
	2					0.137632	0.137632	0.139557	0.143407	0.142445	0.14437	0.146295	0.147257	0.143407	0.145332
	3			0.138595	0.13667	0.13667	0.137632	0.14052	0.142445	0.14437	0.14437	0.143407	0.146295	0.141482	0.14437	0.145332
	4			0.139557	0.137632	0.137632	0.138595	0.141482	0.143407	0.145332	0.14437	0.141482	0.14437	0.142445	0.142445	0.145332	0.143407
	5		0.145332	0.137632	0.137632	0.137632	0.141482	0.14437	0.146295	0.145332	0.141482		0.14437	0.141482	0.142445	0.142445	0.143407	0.13667
	6	0.143407	0.14052	0.137632	0.137632	0.14052	0.143407	0.147257	0.149663	0.148219	0.147257	0.146295	0.145332	0.14052	0.14052	0.141963	0.14052	0.138595
	7	0.141482	0.138595	0.137632	0.137632	0.14052	0.14437	0.151107	0.151107	0.150144	0.146295	0.145332	0.146295	0.142445	0.139557	0.14052	0.139557	0.14052
	8	0.141482	0.141482	0.138595	0.139557	0.141482	0.142445	0.145332	0.153032	0.150144	0.145332	0.14437	0.14437	0.141482	0.14052	0.139557	0.139557	0.14052
	9	0.139557	0.141482	0.14052	0.13667	0.139557	0.141482	0.14437	0.147257	0.145332	0.143407	0.141482	0.14052	0.141001	0.138595	0.13667	0.137632	0.138595
	10	0.14052	0.14437	0.137632	0.135707	0.135707	0.139076	0.143407	0.142445	0.143407	0.142445	0.141482	0.14052	0.138595	0.135707	0.135707	0.138595	0.137632
	11	0.142445	0.14052	0.135707	0.133782	0.134745	0.13667	0.14437	0.145332	0.138595	0.142926	0.142445	0.14052	0.135707	0.133782	0.135707	0.137632	0.13667
	12	0.143888	0.139557	0.134745	0.143407	0.142926	0.139557	0.139557	0.143407	0.14052	0.142445	0.143407	0.138114	0.135707	0.135707	0.137632	0.137632	0.13667
	13	0.149182	0.14052	0.139557	0.141482	0.142445	0.142445	0.14437	0.143407	0.14052	0.139557	0.142445	0.143407	0.137632	0.14052	0.138595	0.137632	0.137632
	14		0.143407	0.14052	0.13667	0.14052	0.142445	0.149182	0.141482	0.138595	0.141482	0.141482	0.143888	0.143407	0.137632	0.137632
	15			0.14052	0.137632	0.138595	0.141482	0.143407	0.14437	0.138595	0.137632	0.139557	0.141482	0.145332	0.138595	0.13667
	16				0.139557	0.139557	0.138595	0.139557	0.143407	0.141482	0.14052	0.139557	0.139557	0.141482	0.14437
	17					0.141001	0.139557	0.139557	0.146295	0.146295	0.143407	0.14052	0.141482	0.142445
7	1					0.137632	0.137632	0.138595	0.143407	0.141482	0.142445	0.141482	0.146295	0.142445					7																		7
	2					0.13667	0.14052	0.139557	0.142445	0.141963	0.141482	0.14437	0.146295	0.141482	0.144851
	3			0.138595	0.133782	0.135707	0.14052	0.141482	0.141482	0.142445	0.142445	0.14437	0.143407	0.14052	0.142445	0.143407
	4			0.138595	0.13667	0.13667	0.14052	0.141482	0.142445	0.141482	0.142445	0.138595	0.141001	0.14052	0.141482	0.146295	0.14052
	5		0.14437	0.138595	0.135707	0.138595	0.141482	0.142445	0.148219	0.142445	0.140038		0.141482	0.139557	0.14052	0.143407	0.14437	0.137632
	6	0.14052	0.139557	0.137632	0.13667	0.139557	0.141963	0.149182	0.150144	0.149182	0.147257	0.145332	0.14437	0.14052	0.141482	0.142445	0.139557	0.138595
	7	0.138114	0.137632	0.135707	0.13667	0.141482	0.142445	0.152069	0.151107	0.149182	0.147257	0.145332	0.147257	0.143407	0.138595	0.14052	0.139557	0.139557
	8	0.14052	0.138595	0.137632	0.137632	0.14052	0.142445	0.145332	0.152069	0.150144	0.145332	0.14437	0.143407	0.141482	0.137632	0.137632	0.138595	0.138595
	9	0.138595	0.14052	0.138595	0.134745	0.13667	0.139557	0.143407	0.148219	0.147257	0.143407	0.14052	0.14052	0.138595	0.134745	0.134745	0.13667	0.137632
	10	0.14052	0.145332	0.135707	0.13282	0.133782	0.138114	0.141482	0.14437	0.143407	0.14052	0.14052	0.139557	0.137632	0.134745	0.133782	0.13667	0.137632
	11	0.141963	0.138595	0.134745	0.134745	0.133782	0.134264	0.14437	0.142445	0.137632	0.142445	0.143407	0.139557	0.134745	0.13282	0.135707	0.13667	0.135707
	12	0.141482	0.13667	0.134745	0.141482	0.139557	0.137632	0.139557	0.142445	0.138595	0.138595	0.143407	0.137151	0.133782	0.133782	0.137632	0.137632	0.135707
	13	0.143407	0.13667	0.138595	0.139076	0.138595	0.14052	0.14052	0.14052	0.137632	0.137632	0.14052	0.141482	0.135707	0.137632	0.137632	0.137632	0.13667
	14		0.141963	0.137632	0.134745	0.138595	0.14052	0.145332	0.14052	0.137632	0.137632	0.138595	0.141482	0.142445	0.138595	0.137632
	15			0.14052	0.137632	0.138595	0.14052	0.14052	0.142445	0.138595	0.137632	0.138595	0.139557	0.143407	0.138595	0.137632
	16				0.138595	0.137632	0.138595	0.139557	0.14437	0.14052	0.137632	0.137632	0.137632	0.138595	0.143407
	17					0.139557	0.139557	0.14052	0.145332	0.143407	0.139557	0.137632	0.139557	0.141482
8	1					0.13667	0.137632	0.139557	0.143407	0.14052	0.143407	0.145813	0.149182	0.143407					8																		8
	2					0.13667	0.13667	0.138595	0.143407	0.141482	0.14437	0.146295	0.149182	0.141482	0.141963
	3			0.135707	0.135707	0.135707	0.138595	0.139557	0.143407	0.142445	0.143407	0.145332	0.147257	0.138595	0.142445	0.143407
	4			0.137632	0.134745	0.133782	0.139557	0.141482	0.14437	0.146295	0.143407	0.14052	0.143407	0.142445	0.142445	0.146295	0.143407
	5		0.139557	0.13667	0.135707	0.138595	0.143407	0.14437	0.148219	0.147257	0.142445		0.141001	0.142445	0.141482	0.145332	0.14437	0.135707
	6	0.14052	0.13667	0.134745	0.135707	0.138595	0.143407	0.148219	0.151107	0.150144	0.147257	0.145332	0.14437	0.14052	0.14052	0.143407	0.138595	0.13667
	7	0.137632	0.13667	0.134745	0.134745	0.139557	0.145332	0.150626	0.148219	0.149182	0.148219	0.145332	0.145332	0.142445	0.13667	0.138595	0.137632	0.137632
	8	0.13667	0.138595	0.13667	0.13667	0.141482	0.141482	0.14437	0.150144	0.148219	0.146295	0.142445	0.141482	0.139557	0.137632	0.136189	0.137632	0.137632
	9	0.13667	0.139557	0.137632	0.134745	0.138595	0.139557	0.142445	0.148219	0.146295	0.141482	0.139557	0.14052	0.13667	0.134745	0.133782	0.135707	0.13667
	10	0.137632	0.142445	0.134745	0.13282	0.13282	0.13667	0.142445	0.14052	0.143407	0.139557	0.139557	0.138595	0.13667	0.133782	0.13282	0.135707	0.135707
	11	0.139557	0.138595	0.133782	0.134264	0.13282	0.134745	0.143407	0.141482	0.14052	0.142445	0.141482	0.138595	0.134745	0.131858	0.13282	0.135707	0.134745
	12	0.14052	0.138595	0.133782	0.14052	0.14052	0.138595	0.14052	0.142445	0.139557	0.14052	0.141482	0.137632	0.13282	0.13282	0.134745	0.135707	0.134745
	13	0.145332	0.139076	0.138595	0.138595	0.139557	0.143407	0.14052	0.141482	0.138595	0.13667	0.139557	0.139557	0.133782	0.13667	0.13667	0.13667	0.134745
	14		0.141482	0.137632	0.134745	0.137632	0.141482	0.145332	0.143407	0.137632	0.138595	0.139557	0.143407	0.138595	0.13667	0.135707
	15			0.138595	0.134745	0.138595	0.139557	0.14052	0.143407	0.139557	0.138595	0.138595	0.14052	0.143407	0.135707	0.13667
	16				0.139557	0.138595	0.139557	0.141482	0.145332	0.141482	0.139557	0.138595	0.139557	0.14052	0.139557
	17					0.141482	0.14052	0.143407	0.147257	0.14437	0.141482	0.139557	0.139557	0.14052
9	1					0.135707	0.13667	0.137632	0.142445	0.143407	0.146295	0.147257	0.147257	0.14052					9																		9
	2					0.135707	0.137632	0.137632	0.143407	0.143407	0.145332	0.147738	0.149182	0.14052	0.143407
	3			0.13667	0.135707	0.135707	0.138595	0.139557	0.143407	0.145332	0.145332	0.145332	0.145332	0.139557	0.145332	0.14437
	4			0.137632	0.134745	0.135707	0.139076	0.141482	0.142445	0.146295	0.145332	0.142445	0.142445	0.139557	0.146295	0.143407	0.143407
	5		0.141482	0.135707	0.134745	0.13667	0.143407	0.142445	0.147738	0.146295	0.143407		0.143407	0.141482	0.141001	0.141482	0.142445	0.135707
	6	0.139557	0.139557	0.134745	0.135707	0.138595	0.139557	0.148219	0.147738	0.149182	0.147257	0.145332	0.14437	0.141482	0.139557	0.14052	0.14052	0.13667
	7	0.139557	0.137632	0.135707	0.13667	0.139557	0.144851	0.150144	0.150144	0.151107	0.146295	0.145332	0.147257	0.139557	0.137632	0.138595	0.137632	0.13667
	8	0.138595	0.137632	0.13667	0.137632	0.139557	0.14052	0.146295	0.152069	0.150144	0.146295	0.143407	0.142445	0.139557	0.137632	0.13667	0.137632	0.138595
	9	0.139076	0.139557	0.13667	0.134745	0.139557	0.141482	0.142445	0.151107	0.148219	0.142445	0.139557	0.139557	0.138595	0.135707	0.134745	0.13667	0.13667
	10	0.138595	0.141482	0.135707	0.133782	0.133782	0.138595	0.143407	0.14437	0.143407	0.14052	0.139557	0.139557	0.137632	0.133782	0.133782	0.135707	0.135707
	11	0.139557	0.13667	0.133301	0.131858	0.13282	0.133782	0.14052	0.142445	0.137632	0.14437	0.141482	0.139557	0.135707	0.133301	0.134745	0.13667	0.134745
	12	0.142445	0.137632	0.133782	0.138595	0.13667	0.13667	0.139076	0.142445	0.139557	0.14052	0.142445	0.138595	0.134264	0.133782	0.13667	0.13667	0.134745
	13	0.141001	0.138595	0.137632	0.139557	0.14052	0.141482	0.139557	0.142445	0.141482	0.138595	0.141482	0.143888	0.135707	0.13667	0.137632	0.13667	0.135707
	14		0.14437	0.138595	0.13667	0.139557	0.141482	0.145332	0.141482	0.139557	0.141482	0.14052	0.143407	0.141482	0.137632	0.13667
	15			0.139557	0.135707	0.137632	0.138595	0.14052	0.145332	0.14052	0.139557	0.14052	0.142445	0.141482	0.137632	0.13667
	16				0.137632	0.13667	0.13667	0.138595	0.143407	0.142445	0.139557	0.14052	0.14052	0.14052	0.142445
	17					0.139557	0.139557	0.14052	0.146295	0.14437	0.142445	0.141482	0.141482	0.143407
10	1					0.13667	0.13667	0.13667	0.142445	0.142445	0.145332	0.147257	0.151107	0.141482					10																		10
	2					0.134745	0.137632	0.137632	0.141482	0.143407	0.147257	0.148219	0.151107	0.142445	0.142926
	3			0.13667	0.134745	0.135707	0.138595	0.139557	0.143407	0.145813	0.146295	0.147257	0.148219	0.142445	0.14437	0.146295
	4			0.138595	0.134745	0.134745	0.140038	0.14052	0.14437	0.148219	0.146776	0.138595	0.143407	0.142445	0.144851	0.145332	0.143407
	5		0.14052	0.13667	0.133782	0.138595	0.14052	0.141963	0.149182	0.148219	0.145332		0.143407	0.141482	0.141482	0.14437	0.143407	0.13667
	6	0.141482	0.137632	0.134745	0.134745	0.138595	0.141482	0.146295	0.150144	0.149182	0.146776	0.14437	0.143407	0.14052	0.14052	0.141482	0.141482	0.13667
	7	0.137632	0.13667	0.133782	0.134745	0.137632	0.14052	0.149663	0.148701	0.151107	0.149182	0.147257	0.147257	0.141963	0.137632	0.139557	0.139557	0.137632
	8	0.14052	0.138595	0.135707	0.13667	0.138595	0.139557	0.143407	0.151107	0.151107	0.148219	0.145332	0.143407	0.142445	0.137632	0.137632	0.139557	0.138595
	9	0.139557	0.14052	0.13667	0.135707	0.137632	0.138595	0.141482	0.150144	0.148219	0.14437	0.141482	0.14052	0.140038	0.137632	0.135707	0.137632	0.137632
	10	0.137632	0.14052	0.135707	0.133782	0.133782	0.13667	0.139557	0.146295	0.147257	0.142445	0.139557	0.139557	0.137632	0.135707	0.134745	0.13667	0.13667
	11	0.14052	0.137632	0.134745	0.134745	0.133782	0.134745	0.143407	0.142445	0.14052	0.145332	0.142445	0.139557	0.135707	0.133782	0.134745	0.13667	0.135707
	12	0.142445	0.137632	0.134745	0.137632	0.138595	0.139557	0.139557	0.143407	0.14052	0.141482	0.142926	0.137632	0.134745	0.135226	0.137632	0.13667	0.13667
	13	0.145332	0.137632	0.138595	0.14052	0.141482	0.143407	0.14052	0.143407	0.139557	0.139557	0.14052	0.141482	0.13667	0.138595	0.137632	0.137632	0.137632
	14		0.14437	0.137632	0.137632	0.141482	0.142445	0.146295	0.141482	0.138595	0.139557	0.139557	0.142445	0.143407	0.138595	0.137632
	15			0.139557	0.13667	0.137632	0.139557	0.141001	0.141482	0.139557	0.138595	0.138595	0.14052	0.141482	0.137632	0.137632
	16				0.138595	0.138595	0.137632	0.139557	0.141482	0.14052	0.138595	0.138595	0.139557	0.139557	0.141482
	17					0.138595	0.137632	0.139557	0.14437	0.143407	0.141482	0.138595	0.139557	0.139557

## Sheet: DISS
MaxDissociation
Signals of insufficient quality were excluded from the property maps. Signals could be rejected based on noise low amplitude, large artefact or ventricluar farfields that could not be substracted.
		1	2	3	4	5	6	7	8	9	10	11	12	13	14	15	16	17
1	1					17.3653	21.7437	24.4762	25.4874	25.8653	25.9954	23.0515	26.6833	25.3427					1																		1
	2					26.0407	28.85	30.5136	31.3218	29.6968	29.5589	28.8826	30.5385	30.2984	28.38
	3			19.0614	24.8705	28.5158	32.2232	33.7437	33.4424	31.7482	29.8361	29.4061	32.5812	32.0505	32.2103	32.0526
	4			26.7123	27.8184	28.69	32.2166	34.4093	36.0374	31.9952	28.1833	30.1549	31.8322	30.0648	31.3785	35.5153	32.6132
	5		26.12	25.1561	26.6242	29.589	32.4509	35.6737	36.1066	34.1905	34.3583		34.8832	29.6247	30.4014	35.6826	34.0281	25.1422
	6	23.8511	28.5278	25.3708	26.0933	29.5136	33.061	38.307	40.0619	39.6802	37.7264	36.6338	34.6471	31.0858	29.2326	33.2116	32.5648	25.1054
	7	26.9514	30.9551	24.7467	27.8472	31.9885	34.6079	40.8623	37.568	37.9902	36.6506	34.7733	36.3705	32.655	28.447	27.5344	27.2821	20.2273
	8	29.3065	33.1595	28.7427	29.217	31.8493	33.6227	39.3652	39.6902	38.3154	33.8337	30.8411	34.1326	34.1302	28.8226	24.1963	24.7626	18.9864
	9	30.7053	36.4908	31.1088	27.8013	28.615	30.8092	37.3619	42.1329	38.2101	33	26.7378	27.8245	29.4005	23.3493	20.075	22.532	17.6386
	10	29.8581	37.0233	30.719	22.1659	23	29.977	37.2753	41.2676	38.6407	33.7912	28.0416	28.0945	25.5206	18.827	18.8694	20.4636	14.6068
	11	28.9423	32.6438	29.8311	24.4788	25.4531	31.5214	37.1888	40.7929	40.5471	37.5738	33.2937	29.2225	23.218	17.2944	20.2727	19.0046	10.7977
	12	28.9194	32.069	29.8139	31.5196	29.8947	32.4059	36.5402	36.9906	37.1101	36.293	35.8093	30.961	23.574	21.5772	21.8836	18.2975	10.0091
	13	28.5442	33.8463	35.629	34.7673	32.5791	33.8171	36.0742	34.3318	28.2638	30.9041	33.8548	33.1415	30.5149	24.6989	21.2831	14.8575	8.48624
	14		31.2102	33.9114	33.6741	33.5276	36.3195	38.1007	34.5174	28.1045	23.492	29.0899	33.8876	32.7319	27.1854	16.4197
	15			30.8739	29.4027	29.2082	32.5826	34.5751	35.0326	26.7506	19.9475	21.9497	28.7252	33.4056	27.7172	16.9562
	16				24.5251	24.0522	24.7763	31.0023	35.4731	30.2217	21.9112	17.6904	19.8756	28.2302	28.3498
	17					14.8977	16.9118	23.1678	29.9499	26.021	18.028	14.1995	14.2993	22.2523
2	1					17.5972	23.6955	24.1655	25.7674	23.5522	22.822	24.5818	29.2153	28.1706					2																		2
	2					25.921	29.3287	29.9632	30.9907	27.3977	26.5778	29.777	33.5616	31.7002	28.7196
	3			18.6498	23.8259	26.3011	30.2182	31.6212	33.9352	29.4416	29.9882	32.2559	33.3895	31.5463	31.1265	29.9035
	4			26.4679	28.228	28.5145	31.7465	34.7477	36.7535	31.8483	29.2981	31.1475	32.6028	30.3007	31.892	33.5478	31.9953
	5		26.6557	26.6115	27.7986	29.9728	33.7667	35.4252	36.9335	34.7333	33.9718		33.4908	31.4463	31.3107	35.2201	33.4761	28.2205
	6	23.8453	28.3295	27.0178	27.1311	30.1304	34.5291	39.7847	39.8242	38.9713	38.1504	36.5626	35.6737	32.7865	28.7384	31.555	32.9163	26.2376
	7	25.8542	28.8899	23.14	28.2098	31.5645	35.8294	41.8936	38.7344	37.2585	37.4365	33.673	38.408	34.4172	28.3065	26.9087	29.0659	22.4531
	8	27.8709	30.7192	27.5045	29.3096	33.0648	34.4097	39.764	39.5492	36.4357	32.769	30.7864	34.0892	34.7133	28.9312	23.2528	23.8795	18.8387
	9	30.908	36.1894	32.2719	29.3122	29.7585	32.7448	37.7249	37.87	36.0664	31.007	27.2374	30.3479	29.709	23.9955	19.9615	22.5457	17.1667
	10	31.0685	36.5271	29.5124	22.4315	23.6143	30.9705	37.8642	38.5708	37.0581	32.2308	27.7185	26.7506	25.331	19.4292	18.6027	19.5886	13.8474
	11	31.877	34.7643	29.5893	26.0865	26.7118	33.4212	39.2365	39.965	38.582	35.8373	31.7176	27.6828	22.9413	18.9018	19.1869	18.0774	10.7517
	12	31.4931	33.8594	28.8523	29.5639	30.3126	34.3077	38.1967	38.4084	36.4302	35.1366	33.8435	29.851	23.6682	19.9105	20.2984	17.8059	11.1126
	13	31.0758	34.0755	33.5894	33.9931	33.0416	34.452	36.9215	34.0553	29.6357	27.9495	30.5395	30.7687	28.3529	22.9427	18.7931	14.9309	8.52304
	14		31.4742	31.0897	31.0966	29.9792	34.9792	35.7523	33.1632	28.4649	23.5158	28.4886	31.4249	32.2401	25.7494	13.2222
	15			27.2281	27.4656	28.1222	30.932	35.0577	35.2727	29.7517	20.4472	20.7477	28.0323	32.6674	28.5571	14.6464
	16				23.4205	25.6928	26.1416	31.4525	35.6868	32.4539	22.6659	17.961	20.455	29.7518	29.4249
	17					18.447	19.6636	22.7602	30.6362	28.452	19.1756	14.4194	14.4316	23.1425
3	1					18.4376	24.0364	26.7051	27.5252	24.338	25.2349	25.3373	32.3943	29.3588					3																		3
	2					27.2095	30.0319	31.6966	31.3178	29.9378	28.6107	31.2339	36.0913	35.1608	28.7075
	3			17.3614	23.7748	27.6795	31.1747	32.6483	34.3735	30.8621	29.9455	32.5024	37.0401	35.3065	31.8205	30.5869
	4			25.2169	26.4395	29.352	31.8311	33.1906	35.4883	32.4005	29.3106	31.8438	36.2075	31.4919	32.3976	32.9078	31.5094
	5		25.3102	24.4233	25.5811	27.8956	32.2103	35.4052	36.9762	35.467	33.662		35.1944	30.1546	29.3093	34.0047	33.3084	25.5906
	6	24.4731	27.238	23.9865	24.9661	28.7581	32.6612	38.5542	37.6066	37.9089	37.4779	35.6511	33.3263	30.4862	28.0947	30.6836	31.2696	25.3422
	7	25.1067	29.3114	24.1946	27.6532	30.9723	33.808	38.7947	37.7284	36.3118	33.8541	32.0587	33.697	31.007	26.789	27.4977	28.0365	22.5147
	8	28.7991	32.2449	27.7664	28.2357	30.3683	33.1765	37.0718	38.8349	37.9444	31.3914	28.0394	30.7169	31.4256	26.4862	24.3634	25.1134	18.3183
	9	30.1694	36.2593	30.6705	27.6227	28.8	30.6195	35.8944	39.6872	37.1295	30.7546	25.2512	27.0115	27.8101	23.1038	21.4053	22.5391	16.732
	10	31.0326	37.021	30.9886	25.6084	25.0355	31.6516	37.7981	38.8075	38.4182	31.891	27.3119	25.5229	25.8891	19.3185	19.2588	20.6622	14.6897
	11	31.5644	34.3218	31.8296	26.1806	26.6615	32.4989	39.1675	39.6478	37.4942	36.0047	32.446	28.3144	22.8781	17.7159	18.9204	18.3245	11.154
	12	30.7183	34.6014	33.6102	33.75	31.5907	33.2963	38.7683	37.9627	33.7037	35.2009	33.7575	29.5606	24.1973	21.6454	20.7455	17.8539	11.7089
	13	29.1193	35.3618	37.8059	36.4709	33.0518	34.4061	36.2277	34.2389	26.3819	26.4748	30.529	31.5505	29.1317	24.7825	20.3288	15.6871	8.57207
	14		32.3	34.9206	34.5378	31.1106	36.0928	37.2104	32.3921	25.078	20.0805	26.94	33.9538	34.7529	29.0705	14.7891
	15			28.9976	28.4041	29.3341	32.2407	34.9344	32.4563	27.4851	18.2558	19.8591	27.9744	34.0047	29.9356	17.8741
	16				23.9302	25.1178	24.9582	31.3718	34.0165	29.9675	20.4522	16.0376	18.0164	28.8019	28.9628
	17					16.8102	16.8042	21.993	28.7086	25.4917	17.0546	12.3128	11.2749	19.8803
4	1					18.56	25.3296	28.1267	28.5986	28.0394	25.8687	24.1947	29.4628	26.0467					4																		4
	2					26.2797	31.6199	34.7449	32.007	31.4826	28.2678	28.9236	33.9111	30.7113	29.6362
	3			18.2898	22.7219	27.9444	34.0251	35.9792	36.4977	31.2844	31.5071	33.4131	34.7365	31.2691	33.4085	30.4145
	4			26.7914	26.2962	30.7171	35.7563	36.7372	37.4605	32.2606	30.4098	33.4472	33.6963	30.7186	33.6868	34.8842	32.7605
	5		27.4421	26.7636	27.6183	31.1236	36.1229	37.1311	36.9151	34.007	35.0721		35.1062	29.3759	31.7126	36.9302	36.2662	28.2699
	6	24.9953	27.2671	25.5469	27.1637	31.9657	35.4558	40.2943	39.09	40.0358	37.6385	37.0972	35.6273	31.7289	31.5596	33.6705	33.617	27.1808
	7	24.7037	27.4082	22.9246	28.9385	31.3533	36.1065	42.3539	40.7212	38.9014	37.5457	35.3563	37.171	34.0966	29.2528	30.1281	27.966	22.8604
	8	26.649	30.6991	27.0385	31.346	32.1945	35.4988	41.061	41.3181	38.9289	34.6998	29.9256	34.0794	33.1406	28.7927	24.5405	23.4148	18.3363
	9	28.7033	34.8135	32.9009	31.3075	31.9657	34.1218	39.1498	39.8609	38.2406	31.7786	27.5195	29.2	27.4128	22.0631	19.0687	22.0891	16.8498
	10	30.5648	36.5059	30.9525	27.1225	27.4356	32.5837	38.6868	38.9394	39.318	33.2299	27.3601	26.8307	23.4989	18.064	16.6452	19.2966	14.1029
	11	29.9322	34.0886	33.0396	31.5886	30.7636	34.4736	39.1944	39.722	38.8819	35.6573	30.8176	27.1797	22.3906	16.7319	17.6094	17.5448	11.0604
	12	29.7471	34.6561	32.5312	34.8188	33.8144	35.6879	39.5461	40.9068	38.4897	36.6583	33.7347	28.4977	22.7323	18.9193	19.4032	17.6697	11.8225
	13	30.6946	37.4384	37.8736	34.787	32.676	36.1806	38.9769	36.8019	31.4409	32.4753	33.5046	31.6407	28.3182	22.6531	18.517	15.725	9.21918
	14		34.1435	33.6728	32.0068	31.4761	35.6782	38.4531	34.5	28.5959	24.0297	29.9248	33.5945	32.1402	25.7677	13.3818
	15			27.8727	27.9773	29.2688	33.5379	36.0909	34.9209	27.9614	19.3455	21.7436	27.5748	31.2128	27.7306	15.0884
	16				22.5442	25.3655	25.3632	30.379	33.4965	28.4365	18.9654	16.0673	18.9258	28.446	27.8545
	17					15.5035	16.238	21.0554	27.3649	24.7553	16.1166	13.1419	12.6879	20.9316
5	1					19.1216	25.3447	28.0847	27.1651	27.4592	28.2272	24.9129	29.9881	28.0327					5																		5
	2					29.1512	33.1253	35.961	34.2506	33.3256	31.951	30.7541	34.2518	32.1729	27.6042
	3			19.1523	25.06	27.4967	34.1393	37.3695	39.3598	35.2005	32.1106	32.6983	34.6628	32.3779	31.5948	31.3721
	4			26.8744	28.286	30.3199	33.6201	35.8568	40.038	36.1678	29.7577	32.0803	32.6636	30.507	32.1803	33.918	30.2951
	5		25.128	25.8594	27.3468	30.8249	34.1981	38.0493	40.7446	35.7351	33.2033		33.6145	29.8286	30.7089	35.0023	33.9649	24.5442
	6	24.6993	28.5854	26.4053	27.5686	31.9452	36.2689	41.3438	40.8014	40.4508	36.5023	34.5571	34.4336	31.1526	30.1698	33.7624	32.3607	25.3883
	7	25.8272	30.2679	24.7539	29.9267	34.2379	38.237	42.8889	40.7703	37.4843	36.2584	33.6946	34.237	32.5767	28.8927	29.3822	28.4357	19.839
	8	27.3824	32.319	29.3288	31.5034	33.0686	36.1797	40.5855	41.5732	39.9098	36.7218	32.0856	33.5419	33.5889	29.0631	24.086	24.9011	19.4392
	9	30.1995	36.6781	32.2925	29.8881	29.6772	32.6077	37.8488	41.2085	40.6128	36.076	29.8096	28.5757	31.1712	24.3914	20.8341	23.6067	17.2523
	10	30.1727	37.1784	30.8488	24.4836	25.0132	32.7348	39.0141	40.2793	41.9509	37.0547	29.3807	28.3021	28.0706	20.9912	18.7127	20.3567	14.1851
	11	30.3418	34.7021	31.3268	25.0989	26.4791	32.1261	39.42	40.2616	39.8736	36.6706	32.8525	29.5753	24.9122	19.6949	19.2746	18.2365	10.8713
	12	32.3852	35.0158	30.7881	30.3589	28.7828	32.8009	38.0113	39.0981	37.0822	36.4069	33.5187	29.8693	26.2683	21.392	20.4334	18.4402	10.9233
	13	33.3042	36.8833	35.8246	33.0138	30.2235	32.6247	36.0573	35.582	30.8138	30.0708	32.9289	33.8684	30.8288	24.9683	20	15.8442	8.20362
	14		35.1418	33.9542	30.5224	28.5831	32.7816	35.692	32.6984	26.3917	22.6644	28.3807	33.3664	33.7552	27.4477	14.2727
	15			27.7857	25.3651	26.7856	29.69	33.846	34.5197	26.7018	19.5	20.9724	26.6442	31.9059	28.0045	16.1936
	16				22.052	24.5896	27.0252	31.2301	34.2884	28.6265	19.9263	14.9745	16.9507	27.1291	27.7721
	17					16.1881	19.2437	22.2546	28.4588	25.7471	17.4499	11.4769	11.1355	19.6425
6	1					17.5057	22.2455	24.836	27.3093	25.3318	24.2762	21.9356	27.241	25.4953					6																		6
	2					24.7211	28.5364	31.0553	32.9814	29.3925	28.2542	28.2788	30.5837	29.4259	27.7129
	3			17.7254	21.8846	24.3589	28.7011	32.0443	34.1879	29.32	27.6967	28.28	31.3768	29.297	29.4846	28.4286
	4			26.23	24.9287	27.0872	29.0714	33.162	33.2648	29.2565	25.0213	29.463	30.6028	30.0278	29.24	31	26.2723
	5		27.5251	25.6181	25.6359	27.0824	29.729	34.9296	34.7654	31.2867	30.9977		32.5341	27.2914	27.1812	32.2089	29.5778	22.371
	6	23.5845	27.4126	25.6895	25.4897	28.3248	31.8314	38.6223	38.4145	36.1611	34.0024	32.9357	33.3326	28.2979	24.7143	28.2413	28.554	22.8027
	7	25.1531	27.1281	23.1968	25.8394	28.7865	33.5467	39.0024	36.0949	33.335	32.7036	29.9356	32.0142	28.963	23.9172	24.4816	24.7169	18.3119
	8	25.5497	29.2638	25.6424	26.7425	29.469	32.7963	37.9528	37.8938	35.092	29.3848	28.0024	31.4302	29.2651	25.1267	21.2609	22.2528	17.2352
	9	28.3502	34.0117	31.6115	26.7664	26.3356	29.629	34.9085	35.7722	34.1388	29.2382	25.1157	26.3904	26.5173	22.1804	19.5172	21.3121	14.9681
	10	30.6157	35.852	30.9863	22.095	22.6135	27.692	33.76	35.0164	35.5212	31.014	25.2343	24.1663	23.4319	17.0837	18.4888	18.6446	12.8068
	11	30.8902	34.192	30.3792	24.3733	25.4193	29.2902	34.8907	36.0424	35.9398	34.3326	29.287	25.7071	20.8009	16.3812	18.4167	16.4738	9.29318
	12	29.1354	33.5507	28.5901	32.0304	30.5527	33	35.7344	36.4398	34.8814	35.0422	32.956	27.7701	24.2915	19.8108	20.1918	15.3539	8.65227
	13	30.1165	34.993	34.1841	34.8154	32.3835	34.1408	35.4286	32.7512	28.6713	29.1353	31.3349	31.9272	30.082	24.1537	19.0736	13.3119	6.62929
	14		32.8558	33.8329	33.3964	31.3302	34.3052	35.4727	31.4005	25.3864	23.3573	28.2771	32.2927	34.2168	27.169	14.0737
	15			30.1026	27.7936	29.2253	30.7535	33.4493	31.9859	25.0068	19.0295	21.9101	27.5395	34.5286	29.8186	17.4457
	16				22.0344	24.1422	24.2346	29.9954	32.3581	27.5843	19.9654	14.9492	16.9118	29.1297	29.9904
	17					13.5824	15.2138	20.9701	27.609	24.6526	16.1844	12.207	11.6927	21.7488
7	1					18.5601	23.7195	24.9212	25.9397	25.088	25.0209	24.4256	29.4858	28.2593					7																		7
	2					25.3727	28.897	30.6438	32.1359	30.2065	28.2233	30.385	33.3484	31.4	26.3341
	3			17.3632	21.9686	26.0721	30.0276	31.2944	33.5806	31.1065	27.75	30.6	33.0423	31.448	27.7929	26.0141
	4			25.2535	25.712	27.1606	29.7425	31.4319	34.5911	30.5163	26.9883	30.5645	31.9837	29.7279	28.6977	29.0143	28.1968
	5		25.4593	24.3796	23.847	26.2356	29.8009	33.4262	35.9115	32.5305	30.0162		34.4907	28.5324	26.5417	30.9929	30.6526	22.9007
	6	23.1762	27.0833	25.0615	25.1383	27.8445	32.6359	39.3092	39.3454	37.3084	35.2643	35.493	35.6326	30.0069	27.0831	29.4279	28.3684	22.2162
	7	25.1808	28.3134	23.9501	26.9543	29.7865	33.5691	39.4636	37.5485	34.9709	34.2158	33.4468	36.5448	31.8902	26.2248	26.9541	25.8059	18.4357
	8	27.2088	29.9907	25.9062	27.8884	30.131	32.3805	37.2212	37.5278	35.9976	31.4917	29.5897	32.4976	32.867	26.3326	22.473	22.6561	17.5249
	9	29.0903	34.7384	31.6083	28.1096	29.0406	31.1625	36.9558	37.7542	34.4214	29.3179	25.1835	29.2431	29.714	22.0919	19.9174	22.2511	15.3575
	10	29.5628	35.2967	29.7927	23.8811	22.8058	29.0984	35.3581	36.9033	35.4439	30.0693	24.7609	26.9381	27.5676	20.1741	19.9911	20.6547	13.4482
	11	28.5948	33.2552	31.5573	26.1474	25.7089	31.2148	35.8794	36.8192	35.42	33.1049	30.8858	28.5252	24.2899	18.847	19.7156	18.8378	11.4199
	12	27.192	31.9977	31.3281	31.5535	30.3326	33.3552	36.9497	36.7437	33.637	31.4434	33.4163	29.9571	24.4845	21.2784	21.8027	16.5799	9.91116
	13	28.2844	33.5671	35.7842	33.8993	31.0046	33.3457	36.8046	33.9703	26.8815	25.4369	28.7737	31.2634	28.8691	23.675	18.5434	13.5218	7.94737
	14		32.3492	32.6236	32.18	29.1526	33.1181	36.3341	32.3341	24.6304	20.6341	26.7619	31.254	32.1429	26.7419	11.3341
	15			30.4167	28.5656	29.2511	30.9656	32.4816	32.2176	25.7528	18.2308	20.2785	27.7327	33.4155	29.9159	16.6061
	16				23.9772	24.4027	25.6583	30.1327	33.3884	29.0917	19.0837	14.7289	18.2922	29.1279	28.9569
	17					16.5822	18.2952	22.3486	29.007	25.1846	15.8356	10.7735	13.1835	21.5953
8	1					15.7244	20.9064	24.8684	27.5499	28.7535	26.9021	23.5792	28.3366	26.2047					8																		8
	2					23.9321	28.4182	30.8456	33.3709	34.0138	31.8541	30.3684	32.9268	29.6636	28.3357
	3			16.898	23.5371	25.9525	29.3641	34.2775	37.7079	34.2186	30.5437	31.1127	33.0288	32.8	31.0698	31.0928
	4			25.1736	27.7056	28.1278	31.4401	35.3981	40.0888	33.8762	27.8128	32.5047	32.7266	30.8106	33.5674	34.8274	31.3756
	5		26.1044	25.4677	26.4774	29.1166	32.04	38.2358	42.1738	36.7225	35.5012		33.9652	29.0833	30.3619	34.5867	34.3475	25.2701
	6	24.0116	27.5991	24.2327	24.9457	28.9294	33.7494	41.4543	42.3835	39.5971	38.1639	36.3184	31.68	28.7097	29.7894	33.0629	32.6545	24.714
	7	25.3073	28.7851	23.7305	28.0336	31.1301	35.5024	40.0896	37.8544	35.3594	34.9518	32.0786	32.8915	31.0814	27.8032	28.6064	28.009	20.3041
	8	26.474	31.1595	26.9753	27.5374	30.2281	34.7852	39.1871	39.442	35.7985	32.7847	29.1349	32.383	33.0963	28.4797	25.0067	24	17.618
	9	28.5789	33.4516	30.5656	26.0809	28.2014	31.2812	37.3977	38.872	37.2572	31.9465	26.9771	29.1797	30.0566	24.0962	20.0667	21.5556	15.426
	10	29.5238	36.0164	29.7539	21.9447	22.8938	30.8636	39.1253	38.5837	36.6183	32.069	29.177	29.4851	27.173	19.1615	18.1441	19.082	13.3867
	11	30.3566	34.9126	29.9978	26.2483	27.9735	32.9483	39.1452	40.8314	37.9233	35.7721	32.3095	30.7081	23.4049	17.3414	17.989	16.9157	10.5533
	12	29.4061	34.7368	31.9213	32.4124	32.0276	35.0342	40.393	38.7716	36.7327	35.6189	35.6313	32.5705	24.6066	20.1233	20.1089	17.2388	10.0913
	13	31.9689	35.1926	36.5104	35.2322	33.8779	35.4084	37.8548	34.6859	30.6159	28.9525	32.8184	33.6767	30.0044	23.9527	18.3356	14.6508	8.24107
	14		33.9549	34.0762	33.0919	31.6689	36.5885	37.1415	32.7249	25.95	21.8132	27.3333	33.7552	33.446	28.1386	14.0159
	15			28.2936	28.1599	30.21	31.8119	33.4233	33.4385	24.8184	18.3524	20.0138	27.6458	32.993	27.8542	15.9314
	16				25.1991	27.6362	27.7002	31.7558	34.4558	27.7494	18.4092	15.2667	18.0276	29.0396	28.3782
	17					16.8695	20.0624	22.9835	28.9506	26.2576	16.5208	11.9907	12.485	21.4009
9	1					17.6448	23.0158	24.4295	27.4005	27.6317	25.2278	25.1452	29.9547	27.5524					9																		9
	2					23.7545	28.7223	31.9159	33.0371	30.9438	28.846	28.8801	35.641	32.1412	28.6262
	3			16.4414	20.4437	24.6882	29.8727	33.2552	36.5711	30.4752	29.9692	31.6739	35.1651	31.6918	30.3396	28.3538
	4			23.9726	24.7143	28.0112	30.4073	33.4206	36.2797	32.1169	29.2209	33.2881	33.7908	30.7034	31.115	29.6816	28.9188
	5		25.9419	25.2427	25.3025	28.8261	31.6651	35.0637	37.5847	34.5595	35.4659		36.9349	29.4583	29.471	31.5787	30.6782	24.0246
	6	21.6032	25.7373	24.7406	24.5291	28.1399	32.2326	37.5108	37.7327	38.3995	38.2129	35.6329	34.8009	31.0577	27.5691	30.1739	29.222	23.5326
	7	24.9355	27.7149	22.7079	26.3571	28.8933	32.1007	37.4545	37.4354	35.8792	35.4584	34.1948	35.9434	32.9698	27.0732	26.575	25.8438	19.5951
	8	28.3045	30.8258	27.7432	28.2472	29.351	31.9261	38.2388	38.1772	34.1329	32.2399	29.6589	34.5326	34.6088	27.0137	22.1351	22.3229	16.1906
	9	29.1327	34.3555	31.0159	26.3079	27.0115	29.612	36.0258	37.3479	34.1914	30.6125	26.1172	30.8995	30.2156	22.7584	19.0828	21.0336	14.7915
	10	29.1281	36.057	30.2973	21.4543	22.387	27.805	35.8555	37.4976	36.7647	33.1935	29.2897	30.4106	27.0295	17.9754	17.9111	17.8453	11.9708
	11	29.956	34.4898	28.6748	24.3208	24.5771	30.4576	36.0584	38.972	38.3784	35.9761	33.6859	30.3968	23.4977	16.6291	17.7191	15.5643	9.0179
	12	30.7086	33.5571	30.3206	31.4864	31.1242	33.4041	37.131	37.8252	36.5561	35.0668	35.2384	31.0866	24.0312	19.9306	19.4424	15.4159	8.70721
	13	30.9231	35.7041	36.3059	34.3264	34.1678	35.1528	35.7465	33	28.6628	29.2984	33.0229	33.028	28.8986	23.5837	18.6788	13.0572	6.78539
	14		34.5287	33.2135	31.1553	28.212	32.338	34.4052	31.9676	24.0787	21.6551	27.3977	33.0162	33.5584	27.4644	12.0596
	15			28.0674	24.8117	24.7075	28.0959	32.5829	32.6154	24.4362	16.5219	18.972	27.2	32.7976	29.6837	15.406
	16				22.1377	22.95	23.4932	30.4548	32.4246	26.6783	16.3753	12.7892	16.7897	28.9222	29.8333
	17					16.47	17.016	21.6982	27.3929	23.5537	13.9481	10.0424	10.846	21.315
10	1					18.8889	24.4459	26.0544	29	26.2804	25.305	23.5728	30.165	28.1995					10																		10
	2					26.44	29.7287	32.289	33.4439	31.2871	28.6493	29.2837	35.7445	32.8112	28.0094
	3			17.6457	22.2036	27.8941	31.3603	33.6697	35.0278	31.2447	29.3333	30.7327	35.555	34.1023	31.6241	30.5714
	4			25.4421	27.5717	30.5112	32.8074	34.787	35.3656	31.4245	26.7674	31.0734	32.9582	28.3372	31.9882	32.5825	29.1499
	5		25.9182	26.7955	27.2275	30.6351	33.065	37.1189	37.0193	34.2112	34.7055		35.2547	29.5463	29.2243	33.0165	31.331	24.3982
	6	24.3779	26.8023	24.609	26.0473	28.055	33.9953	39.8425	40.4434	40.4116	39.7494	38.729	36.0514	30.2488	27.993	29.8788	29.1787	23.5113
	7	26.1545	29.5034	22.7086	26.2394	28.395	34.29	41.3022	39.389	39.3623	39.3487	37.228	37.6408	31.9344	26.5244	25.6521	25.269	19.0318
	8	28.1365	32.2087	26.0764	26.7648	28.6023	32.2569	37.6604	39.2078	37.4425	34.2302	32.479	34.507	32.6589	26.8414	21.7025	21.1927	15.9841
	9	29.9468	34.5532	31.3432	26.0518	26.1211	30.5518	37.3372	39.4068	36.9398	32.3388	27.2069	27.9816	27.7678	21.5399	18.3982	19.544	14.3688
	10	29.1312	35.3248	30.3348	22.68	22.064	29.9887	36.486	41.0502	39.8765	34.8421	26.954	26.2642	23.945	17.5811	16.1029	16.2348	11.509
	11	30.8871	34.5046	31.0717	26.783	25.5145	31.2416	38.3546	41.4369	39.0651	34.0713	30.2673	25.9931	21.8262	15.7533	16.1946	14.8707	9.28315
	12	29.4883	33.5558	31.4305	31.1972	30.0438	32.7466	38.1043	38.1628	36.4691	33.3502	30.652	28.1674	22.4362	18.7348	17.4273	15.0523	9.41986
	13	29.6277	35.7304	37.2391	34.0736	31.6521	31.9861	35.818	34.4512	28.1491	27.1586	29.2936	31.8256	29.161	22.2037	17.54	13.1793	8.03409
	14		33.4702	34.9453	32.4072	28.1795	32.4336	35.6197	32.1667	24.7153	21.2821	26.4315	31.2436	32.8621	26.3072	12.2304
	15			29.8422	28.3864	28.9155	30.6522	34.0808	33.0668	24.9841	16.8184	19.3532	26.0345	31.3651	27.8272	15.3134
	16				25.1697	26.4614	26.4182	31.6568	34.0184	30.2018	19.4668	15.8535	19.0369	28.2097	28.4766
	17					16.7632	17.9157	22.3218	28.785	27.2998	16.3683	13.135	12.6175	20.1197

## Sheet: BT
NumberOfStartingPointsBT
Signals of insufficient quality were excluded from the property maps. Signals could be rejected based on noise low amplitude, large artefact or ventricluar farfields that could not be substracted. Breaktrough can only be identified if a contiguous circle of electrodes enclose the electrode of interest. Therefore electrodes at the border or around a missing electrodes are excluded.
	1	1	2	3	4	5	6	7	8	9	10	11	12	13	14	15	16	17
1	2																		1																		1
	3						11	15	8	23	20	22	15
	4						15	18	7	19	17	27	10	16
	5				20	23	28	7	16	12				29	12
	6			0	19	28	13	17	7	31				22	26	14
	7		0	20	37	22	26	28	49	28				17	24	28	13
	8		16	18	16	20	24	16	32	23	18	18	16	8	15	15	7
	9		10	18	16	25	26	28	48	24	22	19	23	11	10	14	7
	10		13	9	24	22	19	18	18	12	13	34	14	13	10	16	5
	11		23	11	16	27	23	25	33	22	40	49	20	9	7	4	10
	12		13	29	8	18	10	25	20	35	26	18	17	9	11	11	3
	13		15	20	11	43	21	10	12	25	19	15	5	33	31	8	9
	14			13	15	15	28	7	11	17	30	8	9	42	20	0
	15				25	6	25	14	15	39	20	9	13	12	4
	16					12	20	27	20	31	26	10	12	18
	17						22	12	16	16	16	7	20
	1
2	2																		2																		2
	3						7	21	8	18	11	18	5
	4						21	21	21	19	19	23	12	20
	5				15	24	31	17	27	11				19	13
	6			0	9	23	20	20	18	28				22	23	10
	7		0	16	40	39	30	30	38	21				10	24	31	20
	8		6	13	32	17	24	25	24	33	13	23	11	5	23	12	17
	9		5	6	22	27	29	37	40	23	32	21	16	6	7	10	4
	10		15	11	17	21	21	28	23	14	15	20	9	8	6	9	4
	11		24	12	13	18	22	35	40	39	38	66	24	17	4	9	9
	12		16	20	10	27	13	26	29	34	21	18	13	13	11	12	7
	13		20	14	6	64	25	4	9	24	20	17	23	45	24	5	8
	14			8	22	16	32	7	15	14	16	10	12	41	18	0
	15				22	6	20	9	13	32	29	7	7	12	6
	16					19	21	27	18	14	30	13	13	13
	17						20	17	19	18	22	11	16
	1
3	2																		3																		3
	3						7	13	11	21	14	23	12
	4						15	25	16	21	26	19	11	16
	5				19	20	29	9	23	13				25	13
	6			0	13	21	10	14	14	31				16	30	16
	7		0	18	35	27	24	32	35	25				11	23	23	16
	8		10	20	24	11	26	13	28	32	26	22	15	7	9	11	12
	9		9	9	17	23	29	28	36	38	33	24	13	18	7	10	10
	10		19	8	17	18	18	15	19	18	16	12	12	10	11	16	9
	11		24	11	22	26	18	18	33	27	38	64	18	9	10	16	6
	12		16	28	16	24	8	13	19	32	15	29	24	10	8	13	6
	13		16	20	6	39	25	5	16	13	16	9	15	24	14	16	4
	14			15	26	16	29	5	16	14	18	11	6	33	20	0
	15				24	8	23	18	10	42	13	3	11	13	8
	16					15	15	30	18	15	30	9	12	18
	17						17	16	15	13	17	6	11
	1
4	2																		4																		4
	3						19	20	8	17	14	22	18
	4						25	13	16	18	22	23	14	20
	5				19	22	35	19	29	5				31	10
	6			0	15	21	19	28	23	28				24	38	15
	7		0	24	39	28	28	44	49	40				7	21	30	15
	8		11	23	24	18	28	19	26	23	26	25	12	3	22	11	19
	9		6	11	23	26	34	51	43	26	27	28	29	16	10	19	8
	10		13	10	29	15	31	17	23	15	13	28	17	13	11	23	9
	11		27	14	19	24	26	28	31	29	35	51	21	14	11	18	7
	12		10	16	23	24	20	11	15	25	17	23	15	9	13	13	5
	13		19	20	9	46	25	6	6	24	25	16	9	29	20	8	7
	14			12	20	17	18	8	8	24	17	13	11	26	12	0
	15				17	17	28	12	14	33	26	10	12	16	5
	16					12	19	27	15	23	34	10	11	18
	17						16	22	19	12	26	5	12
	1
5	2																		5																		5
	3						17	15	9	16	20	17	14
	4						22	14	24	21	17	25	14	21
	5				13	19	36	16	28	15				30	12
	6			0	14	26	21	20	15	36				20	20	16
	7		0	25	36	19	23	32	56	24				13	20	35	12
	8		8	35	25	18	29	25	30	27	25	26	13	7	13	11	6
	9		7	15	19	25	46	37	39	29	33	19	25	15	11	7	9
	10		16	8	20	20	22	27	25	18	22	21	11	9	15	14	9
	11		22	12	22	19	16	23	50	30	29	66	13	9	9	10	2
	12		22	19	17	22	12	18	25	35	21	30	27	12	12	17	5
	13		20	19	4	42	18	8	15	27	19	20	19	43	26	15	11
	14			23	19	20	21	13	20	13	20	10	14	43	24	0
	15				22	8	14	13	18	45	22	8	13	33	10
	16					12	17	26	16	11	42	7	15	22
	17						9	24	11	15	17	4	10
	1
6	2																		6																		6
	3						14	11	10	27	18	23	20
	4						16	14	14	26	20	22	9	17
	5				15	15	19	9	19	10				22	9
	6			0	15	21	18	22	15	28				21	24	12
	7		0	24	34	16	17	17	40	22				10	15	19	12
	8		12	13	18	9	12	16	34	22	23	27	10	10	10	5	5
	9		9	5	12	13	30	28	37	20	33	18	16	10	11	6	6
	10		11	10	28	15	23	11	18	17	12	10	11	13	5	12	4
	11		16	8	17	23	20	26	44	33	32	49	10	13	4	8	4
	12		16	12	16	25	7	18	14	30	20	19	17	11	11	9	1
	13		11	25	2	42	18	7	16	30	20	14	11	38	23	5	7
	14			17	19	15	28	12	15	18	22	5	16	46	25	0
	15				25	5	19	14	6	38	27	6	10	18	5
	16					6	14	33	17	17	34	5	10	17
	17						17	14	22	16	22	9	13
	1
7	2																		7																		7
	3						11	18	13	14	18	23	10
	4						24	18	12	18	18	20	15	10
	5				16	13	24	17	27	7				24	11
	6			0	8	18	12	16	11	30				25	23	12
	7		0	17	31	24	21	31	39	26				7	16	26	10
	8		10	23	28	15	27	19	32	29	28	24	16	8	15	9	6
	9		8	7	17	20	29	31	31	29	29	18	18	14	6	9	6
	10		12	12	28	10	26	18	19	13	11	15	10	4	12	13	4
	11		21	14	18	21	22	16	29	23	27	63	20	9	10	8	2
	12		13	17	10	21	14	15	11	34	21	22	12	16	21	6	5
	13		24	19	5	51	29	9	14	23	20	14	13	44	23	14	5
	14			13	27	20	29	13	11	12	12	9	7	30	31	0
	15				21	2	20	16	10	38	30	7	9	19	7
	16					11	16	29	21	20	33	6	7	16
	17						17	15	25	14	18	5	13
	1
8	2																		8																		8
	3						9	14	19	21	17	14	12
	4						14	19	13	19	28	21	17	17
	5				12	18	36	21	21	18				23	11
	6			0	7	23	12	12	11	24				19	30	11
	7		0	21	37	24	32	44	39	25				9	13	28	13
	8		8	19	23	17	28	16	30	21	24	29	6	3	16	14	14
	9		8	9	16	23	27	37	45	22	43	20	23	7	16	16	6
	10		12	6	32	17	19	20	18	7	18	30	15	10	11	14	9
	11		24	14	19	18	17	22	36	35	44	57	22	17	12	7	10
	12		12	17	13	29	15	16	21	41	21	24	18	11	8	11	3
	13		18	17	7	49	20	11	7	29	19	21	11	41	17	13	6
	14			11	20	18	27	7	13	15	23	10	10	54	20	0
	15				25	7	20	6	16	39	32	8	9	15	12
	16					14	15	27	15	10	31	8	11	15
	17						20	20	17	19	16	8	7
	1
9	2																		9																		9
	3						14	16	9	16	18	22	7
	4						19	12	15	28	19	34	14	22
	5				16	20	25	15	25	12				23	12
	6			0	8	11	17	15	10	35				18	28	17
	7		0	23	36	23	24	26	52	21				11	23	34	5
	8		12	25	30	14	22	11	30	31	24	25	12	7	22	14	13
	9		14	9	9	18	40	36	29	21	26	19	24	17	13	8	6
	10		7	12	22	16	24	22	21	12	17	17	15	15	18	7	5
	11		18	13	8	19	16	27	30	29	49	50	18	12	6	11	10
	12		11	19	15	23	16	16	16	30	17	19	28	16	17	8	2
	13		14	16	2	39	23	7	12	16	20	19	12	42	24	9	3
	14			16	14	16	31	12	9	13	22	16	10	35	24	0
	15				28	11	17	14	15	39	29	8	18	15	9
	16					15	19	40	16	13	29	7	4	15
	17						16	18	13	15	11	5	5
	1
10	2																		10																		10
	3						15	11	12	15	22	25	13
	4						28	13	13	18	22	31	11	18
	5				15	30	32	14	28	11				30	15
	6			0	23	27	10	26	14	22				16	30	14
	7		0	13	46	23	26	33	43	29				10	22	25	12
	8		11	23	24	9	13	17	25	33	31	25	14	8	18	10	6
	9		5	8	11	21	28	33	32	28	42	11	17	10	13	12	5
	10		9	8	28	17	19	22	20	11	19	27	18	10	4	15	4
	11		35	12	19	18	13	18	35	33	44	52	21	4	8	7	6
	12		10	19	11	20	9	14	18	30	16	17	20	12	9	10	1
	13		11	16	11	46	32	12	14	14	15	15	12	38	22	11	6
	14			19	16	13	21	13	14	20	21	16	12	38	17	0
	15				22	8	14	8	17	42	24	5	10	20	4
	16					10	25	30	21	21	29	6	9	15
	17						15	24	17	16	14	6	15

## Sheet: FI
FractionationIndices
Signals of insufficient quality were excluded from the property maps. Signals could be rejected based on noise low amplitude, large artefacts or ventricluar farfields that could not be substracted. Fractionation index is particularly sensitive to noise. Therefore electrodes with substantial noise are more strictly excluded.
		1	2	3	4	5	6	7	8	9	10	11	12	13	14	15	16	17
1	1					3.79909	3.19908	3.49206	3.46207	2.97945	2.77262	2.71429	3.1381	3.17907					1																		1
	2					3.50679	3.68182	3.46136	3.33563	2.53009	2.57044	2.47887	2.90625	2.92308	3.35897
	3			3.375	2.72098	4.58784	3.94305	4.02288	3.52074	2.89882	2.51306	2.76761	3.20941	2.70183	3.3528	3.53828
	4			3.55936	3.30942	3.58145	3.68203	4.13023	3.88551	3.19048	2.40952	2.94379	3.62238	2.73148	3.14252	3.70588	3.08491
	5		4.96706	3.18326	3.14094	4.34932	3.45561	3.69249	3.8981	5.31905	5.90867		6.98364	2.59674	3.12207	3.60143	3.39344	2.42342
	6	3.23349	5.16204	2.65843	2.68444	2.31364	3.11737	4.18705	3.87381	3.83532	3.85849	3.67606	3.56235	2.88399	2.74651	3.53488	3.06019	2.25336
	7	7.59491	3.21124	2.0815	2.60899	2.91514	3.35267	4.38406	3.94511	3.8802	3.16145	5.27685	5.6057	3.52214	2.76959	2.76147	2.23394	2.12273
	8	7.23502	2.72893	3.09396	6.41163	2.60046	2.91435	4.4105	4.03659	3.38142	4.22565	2.49766	6.93953	3.38605	2.83641	1.76484	2.05251	1.80952
	9	5.41531	7.04128	6.04082	2.27679	2.42141	2.68276	3.65661	3.65459	3.5628	2.6093	2.13921	2.90531	2.83295	1.89498	1.10455	1.71233	2.12273
	10	3.70233	8.01399	3.26549	1.65284	1.47894	2.47235	3.84706	3.84272	3.6643	2.42227	4.86374	2.58525	2.28899	1.18427	0.704955	1.53182	1.32955
	11	7.22633	3.03881	2.16667	2.1804	1.42411	2.13544	3.91608	4.40941	3.95402	6.91335	3.05128	2.63303	1.47865	0.716854	0.918182	1.39408	0.752273
	12	4.01182	4.74253	2.33408	3.77136	2.373	2.07483	3.6	4.34434	3.58716	3.53488	4.45116	2.33028	1.56054	1.06264	1.61416	1.34325	0.804545
	13	4.29833	3.58486	3.36878	3.38479	2.59535	2.57639	2.82135	3.19258	2.49541	2.37443	2.92396	6.41995	1.5931	1.73563	1.30137	1.18391	1.38532
	14		4.05774	3.20227	2.66295	2.82258	2.51494	3.11241	2.79814	2.07955	2.05034	1.86866	2.94379	3.15851	1.23112	0.720183
	15			3.56422	2.25792	2.35011	2.29128	3.15962	2.70233	2.24027	1.37215	1.36613	2.14781	2.78089	1.48276	1.32719
	16				2.0274	1.74603	1.43379	1.52656	3.04684	2.08776	1.5877	1.48853	1.52535	2.9	2.24883
	17					2.36512	1.79582	1.62005	3.05012	2.3271	4.68692	1.45413	1.55916	2.13084
2	1					3.67206	3.07256	3.24943	3.36744	2.94896	2.74005	2.67056	3.2512	3.29439					2																		2
	2					3.51693	3.56782	3.23908	3.0787	2.41395	2.49292	2.52347	2.9218	3.16862	3.62383
	3			3.17011	2.65625	4.41798	3.76364	3.91686	3.53241	2.67523	2.44	2.88389	3.2209	2.58333	3.57611	3.57882
	4			3.45872	3.27765	3.47875	3.57604	3.99065	3.89437	2.93365	2.56573	2.98157	3.58411	2.59674	3.21362	3.88038	3.23641
	5		5.03538	3.30575	3.35747	4.52154	3.39261	3.82944	3.91686	5.44524	6.10824		6.86406	2.85047	3.23131	3.66979	3.44976	2.575
	6	3.24018	4.82273	2.42222	2.69778	2.44165	3.12821	4.31579	3.84798	3.6555	3.84964	3.59811	3.78555	2.9884	2.79398	3.72365	3.17674	2.36652
	7	6.82448	2.75281	2	2.42188	3.15438	3.68322	4.21277	3.8756	3.79469	3.15108	5.17184	5.31604	3.51049	2.91244	2.89041	2.42273	2.30892
	8	7.19249	2.621	2.70655	6.4588	2.62963	3.0162	4.46262	3.81055	3.23571	4.06905	2.49765	6.75117	3.44988	2.86239	1.97494	1.93864	1.82258
	9	5.65747	6.59815	6.20449	2.36425	2.54442	2.70115	3.69231	3.75887	3.39336	2.34571	2.03425	2.76498	2.806	2.02928	1.09297	1.61416	2.03704
	10	3.60959	8.17371	3.21798	1.79326	1.45291	2.36961	3.7377	4.13915	3.64186	2.5035	4.89703	2.48284	2.25057	1.22472	0.638826	1.40455	1.07062
	11	6.99304	2.99542	2.25223	2.17073	1.59424	2.05856	4.07494	4.32009	4.18707	7.10142	2.77778	2.62989	1.48758	0.629464	0.853604	1.2369	0.593103
	12	4.0787	5.00907	2.30425	4.01598	2.47586	2.28507	3.63934	4.27146	3.53089	3.21296	4.25467	2.23928	1.44989	0.812081	1.29385	1.1758	0.767816
	13	4.45498	3.59039	3.25	3.22633	2.59815	2.63232	2.76443	3.16129	2.4276	2.27294	2.43953	6.1285	1.61991	1.54817	1.13333	0.981567	1.21889
	14		4.13615	3.26207	2.71461	2.72286	2.30254	3.00463	3.04895	2.01361	1.84009	1.58409	2.69053	3.00233	1.15777	0.664352
	15			3.78111	2.10421	2.20814	2.19048	2.81986	2.98368	2.25287	1.46292	1.38409	2.053	2.75878	1.4289	1.29274
	16				2.20909	1.8296	1.52876	1.59276	3.21578	2.49309	1.70655	1.55963	1.43649	2.8103	2.26995
	17					2.67512	2.06591	1.83937	3.10094	2.51991	4.96019	1.53226	1.41898	2.12383
3	1					3.85488	3.32346	3.55991	3.46789	2.96296	2.8186	2.95283	3.30641	3.27546					3																		3
	2					3.55405	3.7631	3.56552	3.38084	2.48618	2.61772	2.69928	2.99279	2.98135	3.45991
	3			3.17007	2.80405	4.48984	3.97701	3.94483	3.36659	2.58411	2.54028	3.03095	3.29953	2.78341	3.59674	3.55399
	4			3.65068	3.22422	3.59865	3.59361	4.00471	3.70794	3.16307	2.73412	3.13986	3.72494	2.90951	3.38118	3.71631	3.18632
	5		4.8912	3.22197	3.35811	4.67053	3.59112	3.64403	3.99525	5.58255	6.13753		6.90398	3.05386	3.33488	3.64539	3.30607	2.30201
	6	3.36066	5.14416	2.83371	2.93454	2.29032	2.99533	4.39518	3.9763	3.84813	3.95804	3.53396	3.55634	2.81106	2.67898	3.34642	3.15438	2.16444
	7	7.16241	3.28636	2.18792	2.59009	2.7806	3.40984	4.49642	4.03837	3.92086	3.34211	5.07512	4.88578	3.32401	2.72477	2.93119	2.45662	2.32054
	8	7.39261	2.64302	2.9093	6.30206	2.36131	2.76	4.39474	4.05024	3.45169	4.17184	2.42923	6.29002	3.4	2.7844	2.05643	2.02948	1.8623
	9	5.55684	7.02103	5.84091	2.28182	2.35172	2.67285	3.71127	3.76777	3.63549	2.61806	2.09447	2.84101	2.83982	2.14447	1.23608	1.67338	1.88964
	10	3.65581	8.21911	3.20682	1.65487	1.49224	2.3733	3.82394	3.8615	3.84112	2.7007	4.93807	2.42661	2.26697	1.26503	0.736726	1.51902	1.21205
	11	7.19906	3.03908	2.18142	2.06608	1.43653	2.21896	4.04245	4.40662	3.89607	6.62558	2.76322	2.44647	1.54628	0.665198	0.922566	1.30022	0.683036
	12	4.09155	4.85811	2.24499	4.22196	2.34419	2.13426	3.80615	4.13287	3.32176	3.3418	4.40185	2.17391	1.33038	0.92511	1.58929	1.2809	0.822222
	13	4.6611	3.42166	3.28995	3.6317	2.55294	2.5892	2.81925	3.33489	2.36111	2.23853	2.58701	6.02064	1.51786	1.70628	1.36036	1.16327	1.44369
	14		4.33571	3.34112	2.54462	2.35253	2.43155	3	2.69142	2.09633	1.75862	1.5843	2.77829	3.28604	1.47273	0.693878
	15			4.03538	2.28995	2.21198	2.17593	2.96956	2.77069	2.27126	1.37788	1.21016	1.87646	2.84397	1.57471	1.35469
	16				2.24419	1.79263	1.53364	1.48499	3.08235	2.20418	1.57343	1.44366	1.3271	2.64336	2.31163
	17					2.49885	1.87179	1.62093	2.84848	2.33967	4.63895	1.34597	1.41509	1.96479
4	1					3.81778	3.42601	3.58145	3.67517	3.15313	2.75656	2.78365	3.34293	3.22611					4																		4
	2					3.54405	3.84842	3.62187	3.43721	2.46636	2.62559	2.72315	3.00721	3.07042	3.55869
	3			3.18363	2.74614	4.37556	4.01822	4.2679	3.56977	2.68065	2.50472	3.02347	3.31294	2.75638	3.54225	3.46838
	4			3.79138	3.28508	3.57018	3.74713	4.07442	3.82326	3.00235	2.55738	3.09404	3.67523	2.83721	3.25986	3.77305	2.91395
	5		5.27358	3.5	3.39062	4.82022	3.60993	3.67213	3.875	5.56103	5.9814		7.04388	2.80278	3.06897	3.5093	3.33102	2.30973
	6	3.49184	5.19635	2.83482	2.87611	2.41648	3.15814	4.36603	3.92891	4.04057	4.0892	3.57639	3.88657	3.00683	2.82798	3.42396	2.99541	2.34375
	7	7.26852	3.18141	2.33703	2.75604	3.34873	3.40509	4.53207	4.13942	3.89183	3.39663	5.35629	5.52225	3.48736	2.87359	2.92906	2.30839	2.33333
	8	7.00924	2.9095	3.16742	6.57366	2.68192	3.12933	4.67136	4.18795	3.37678	4.26241	2.67209	7.14953	3.553	2.89977	1.97297	2.08296	1.78251
	9	5.52336	6.80186	6.63594	2.43805	2.71625	2.64598	3.67512	4.04077	3.74057	2.65501	2.34713	2.92184	2.87844	2.02703	1.30155	1.72383	1.99103
	10	3.71296	8.33333	3.51584	1.86871	1.72444	2.61086	3.81903	4.1655	3.82719	2.56782	4.73394	2.41648	2.13995	1.13024	0.749446	1.46966	1.2528
	11	7.52103	2.93864	2.36784	2.45733	1.63991	2.26432	4.03935	4.38551	4.125	6.60094	2.71363	2.2235	1.27679	0.730263	0.832589	1.2713	0.635347
	12	3.96984	5.00452	2.49107	4.16706	2.39907	2.12984	3.62673	4.20746	3.46682	3.44954	4.1784	1.88009	1.34292	0.977578	1.37613	1.22851	0.737079
	13	4.50117	3.6484	3.49885	3.51852	2.55012	2.61343	2.74365	3.16317	2.51136	2.54036	2.80365	5.72769	1.48182	1.54649	1.10431	1.02045	1.28082
	14		4.4388	3.36613	2.70362	2.51481	2.49769	3.13146	2.78372	2.13014	2.0274	1.82688	3.14055	3.10805	1.28474	0.629545
	15			3.85185	2.21136	2.24829	2.27126	2.78322	2.76047	2.13636	1.35698	1.18245	1.94626	2.77305	1.37443	1.30612
	16				2.04989	1.70805	1.4023	1.28311	3.00932	2.25866	1.36406	1.38747	1.34339	2.55869	2.22633
	17					2.553	1.81007	1.44342	2.76066	2.33017	4.36597	1.34651	1.45626	2.05896
5	1					4.15541	3.42177	3.6865	3.77442	2.93939	2.77518	2.71529	3.4228	3.29138					5																		5
	2					3.96163	4.10478	3.79817	3.59719	2.51163	2.70396	2.60284	3.05701	3.13551	3.40984
	3			3.42308	2.97778	4.7051	4.14612	4.25635	3.73598	2.79021	2.63529	2.96912	3.33021	2.67512	3.5237	3.60465
	4			3.60731	3.38063	3.7651	3.84897	4.30751	4.14964	3.17258	2.58195	3.28899	3.5576	2.81308	3.24824	3.62998	3.08431
	5		5.09242	3.27211	3.46067	4.84793	3.5711	3.73239	4.13735	5.5537	6.15366		6.89486	2.89671	3.07277	3.57576	3.40984	2.27211
	6	3.32947	5.21412	2.73051	2.89823	2.3379	3.30896	4.4375	4.06699	3.93765	3.86854	3.51282	3.60606	2.98826	2.87674	3.57176	3.09817	2.25508
	7	7.43779	3.40179	2.25499	2.78444	3.27021	3.64692	4.47826	4.10526	4.00726	3.20574	5.35664	5.53318	3.51395	3	2.90389	2.37472	2.07483
	8	6.94796	2.82579	3.2455	7.03596	2.59039	2.96313	4.47541	4.32195	3.49024	4.19424	2.57639	6.8814	3.63048	2.88288	2.00452	1.98202	1.64414
	9	5.22477	6.25571	6.14059	2.4698	2.54176	2.66893	3.58372	3.85545	3.77672	2.78111	2.24771	2.99771	3.10502	2.21267	1.09956	1.59775	1.87387
	10	3.42273	8.11502	3.24153	1.76149	1.46476	2.41798	3.69789	4.14319	4.03505	2.79499	5.05734	2.44851	2.50114	1.27152	0.636971	1.41535	1.06546
	11	7.48961	3.09007	2.23684	2.29231	1.60659	2.06416	4.01856	4.42824	4.43218	7.35294	2.82949	2.54566	1.56982	0.788419	0.810268	1.25901	0.593679
	12	3.91183	5.17647	2.43488	3.90971	2.3914	2.11991	3.42986	4.11449	3.46804	3.68966	4.33645	2.3211	1.68958	1.01114	1.39052	1.1535	0.683973
	13	4.65802	3.84897	3.57403	3.7133	2.56912	2.32952	2.79358	3.36721	2.55862	2.41553	2.84404	6.25404	1.57207	1.65158	1.31222	1.03612	1.10407
	14		4.33647	3.18535	2.65022	2.61048	2.33793	2.92414	2.73782	2.17972	2.00231	1.9633	2.89862	3.09091	1.4	0.784091
	15			3.8871	2.21493	2.19187	2.28733	2.75862	2.67053	2.22248	1.47674	1.3341	1.89535	2.76235	1.46364	1.26424
	16				2.0158	1.7483	1.51716	1.42141	2.97907	2.26914	1.51152	1.46991	1.27465	2.51643	2.25581
	17					2.58945	1.87927	1.5625	2.82588	2.52927	4.87413	1.45139	1.27804	1.86449
6	1					3.70295	3.26591	3.43736	3.5093	2.64471	2.63095	2.64678	3.07952	2.93632					6																		6
	2					3.36961	3.61364	3.42627	3.15116	2.36682	2.3943	2.44712	2.69856	2.70118	3.25647
	3			3.11416	2.47511	4.32957	3.69425	3.89744	3.41299	2.63294	2.22749	2.77882	3.12322	2.529	3.45606	3.48095
	4			3.65962	3.10805	3.37844	3.46083	3.87269	3.77069	2.81412	2.49526	2.72222	3.39252	2.62181	3.02588	3.75708	2.78169
	5		5.46539	3.4375	3.2235	4.48513	3.25	3.39671	3.67062	5.45972	5.38462		6.81647	2.54779	2.94824	3.36385	3.15566	2.1693
	6	3.5939	5.53953	2.81735	2.77471	2.30858	3.09836	4.03088	3.8747	3.59615	3.66746	3.20714	3.33021	2.61201	2.55069	3.20186	2.73103	2.02721
	7	7.07889	3.254	2.26316	2.61468	2.88863	3.4229	4.25121	3.86375	3.8044	3.15663	5.16229	5.07329	3.05556	2.57471	2.63594	2.12557	1.98165
	8	7.02079	2.74541	2.99544	6.48736	2.45517	2.8125	4.20283	3.72099	3.22518	4.03325	2.41509	6.83488	3.21163	2.63825	1.82151	1.82232	1.61416
	9	5.09447	6.08625	5.89195	2.17234	2.24886	2.2235	3.28404	3.49161	3.4689	2.52123	2.04167	2.76256	2.73441	1.84703	0.887872	1.42597	1.58314
	10	3.54398	8.30788	3.06393	1.52489	1.21798	1.90805	3.42118	3.93192	3.77594	2.51628	4.46172	2.30716	2.16166	1.02036	0.569507	1.35535	0.961364
	11	6.90888	3.05152	2.07675	1.88667	1.25112	1.53288	3.64419	4.17647	3.94676	6.77986	2.57407	2.24943	1.35747	0.598655	0.718468	1.21185	0.445455
	12	3.90024	5.09908	2.17793	3.67991	2.18267	1.8318	3.39261	4.11806	3.45116	3.54567	4.38657	2.12184	1.4574	0.824719	1.39498	1.09817	0.65
	13	4.46845	3.67674	3.39394	3.59346	2.42588	2.29343	2.56674	3.14186	2.29195	2.22248	2.69555	6.12676	1.46014	1.58257	1.1954	0.990826	1.10297
	14		4.39183	3.2993	2.5672	2.60465	2.277	3.05463	2.83565	2.05682	1.86079	1.75289	2.74005	3.06993	1.27778	0.695853
	15			4.05594	2.17661	2.26437	2.24654	2.4977	2.69321	2.22146	1.35	1.2235	1.87907	2.74286	1.40465	1.23557
	16				2.07569	1.70183	1.3918	1.10755	2.98605	2.16397	1.52074	1.40185	1.2993	2.53538	2.33971
	17					2.29466	1.75172	1.48506	2.80569	2.19718	4.4539	1.25116	1.25296	1.98341
7	1					3.64626	3.02262	3.38964	3.62645	2.93981	2.83256	2.81395	3.34198	3.0514					7																		7
	2					3.19318	3.60641	3.38813	3.39631	2.53364	2.5186	2.61972	2.96659	2.78161	3.31529
	3			2.94725	2.37444	4.33333	3.73963	3.90888	3.49539	2.52083	2.42757	2.84706	3.10798	2.43418	3.22588	3.32
	4			3.56452	3.10658	3.47936	3.58237	4.03286	3.73364	3.17674	2.54779	2.78571	3.42424	2.47209	2.8814	3.5537	2.79861
	5		4.99522	3.34028	3.16438	4.36952	3.18033	3.30913	3.74641	5.42488	5.75289		6.6412	2.55787	2.78241	3.28941	3.223	2.05869
	6	3.1762	5.19444	2.74487	2.76871	2.32483	3.09693	4.08454	3.73188	3.78554	3.88571	3.57512	3.55116	2.83641	2.54965	3.17442	2.79405	2.01577
	7	6.86728	3.26267	2.07256	2.51598	2.99072	3.30445	4.09466	3.75243	3.8932	3.11751	5.19622	5.3066	3.29673	2.66055	2.5711	2.10274	1.90971
	8	6.91647	2.69907	2.99542	6.59453	2.35402	2.57773	4.18353	3.70702	3.23245	4.01418	2.36131	6.49057	3.22018	2.62217	1.77477	1.70814	1.58145
	9	5.125	6.65046	6.01382	2.09843	2.40181	2.33181	3.34186	3.57041	3.22619	2.34571	1.87844	2.56651	2.67963	1.74888	0.895089	1.41031	1.66516
	10	3.45476	8.48086	3.17312	1.64317	1.35045	2.15789	3.27442	3.91038	3.67757	2.43187	4.54023	2.24083	2.06532	1.15625	0.751111	1.16143	0.925676
	11	7.38407	2.9884	2.20674	2.23583	1.52667	1.87696	3.8747	4.21362	3.90023	6.54545	2.70163	2.26835	1.35955	0.687361	0.875847	1.15315	0.442438
	12	3.93677	5.00457	2.4809	3.97674	2.29358	2.30543	3.46682	3.99542	3.3379	3.35566	4.02791	1.86005	1.18142	0.953229	1.45805	1.12557	0.719818
	13	4.33886	3.55556	3.50116	3.63616	2.44037	2.33875	2.73793	2.95652	2.34169	2.17342	2.31178	5.89744	1.62528	1.52273	0.968037	0.910345	1.14416
	14		4.08314	3.22633	2.47778	2.58542	2.39815	3.05607	2.76037	2.07256	1.70455	1.55102	2.76905	3.11007	1.22093	0.689095
	15			3.86111	2.02941	2.18326	2.02523	2.69124	2.57639	2.13605	1.40498	1.25114	1.72581	2.44601	1.51636	1.22145
	16				1.93379	1.5362	1.22551	1.35469	2.94651	2.0711	1.50679	1.25285	1.28539	2.4814	2.27512
	17					2.6895	1.97941	1.70872	2.74005	2.26636	3.94676	1.07551	1.27294	1.97882
8	1					3.73864	3.25571	3.55889	3.65429	3.01152	2.77622	2.7305	3.27361	3.13882					8																		8
	2					3.40498	3.67045	3.64055	3.64319	2.6682	2.64	2.60526	3.07805	2.91355	3.31469
	3			3.16063	2.65843	4.27149	4.02074	4.15826	3.83411	2.86977	2.55319	2.85612	3.3774	2.72414	3.48605	3.53132
	4			3.70833	3.24045	3.59417	3.76037	4.13889	4.15654	3.20714	2.59953	3.06977	3.68925	2.64434	3.16977	3.72104	2.94836
	5		5.11833	3.30184	3.22398	5.01865	3.43765	3.64387	4.11905	5.58612	6.10588		6.75406	2.59259	3.09049	3.66746	3.34752	2.16964
	6	3.22171	5.14351	2.80761	2.76471	2.2574	3.06792	4.33654	4.06553	3.98544	4	3.38208	3.61647	2.76037	2.65509	3.54312	3.16364	2.26802
	7	7.09611	3.50226	2.33408	2.59641	2.93379	3.27488	4.46247	3.8932	3.88264	3.23614	4.8881	4.9434	3.36744	2.87557	2.68421	2.26351	1.97303
	8	7.18919	2.74715	3.13483	6.4195	2.62673	2.67667	4.38369	3.91787	3.36893	4.21053	2.48372	6.39908	3.25	2.70495	1.97996	1.90541	1.66067
	9	5.42105	6.67051	6.02941	2.33708	2.42986	2.42404	3.42791	3.64734	3.52404	2.55116	2.16284	2.76267	2.87783	1.98434	1.24444	1.56889	1.75561
	10	3.62358	8.41218	3.29754	1.66814	1.45796	2.1746	3.42227	3.92558	3.66979	2.61379	4.73563	2.53333	2.18202	1.18142	0.682927	1.35255	0.935556
	11	7.88345	3.05057	2.30201	2.30872	1.45796	1.87416	3.82201	4.37237	3.95814	6.28605	2.8776	2.52262	1.40487	0.700873	0.728477	1.21064	0.488889
	12	3.92037	5.25172	2.46637	3.91475	2.39401	2.06393	3.41628	4.40093	3.50922	3.30415	4.447	2.10455	1.49231	0.933921	1.40222	1.16295	0.699332
	13	4.40191	3.59629	3.55427	3.49885	2.43318	2.31323	2.64055	3.22171	2.42273	2.41629	2.74483	6.24885	1.48222	1.57432	1.17687	1.12472	1.16071
	14		4.35071	3.3341	2.63453	2.65079	2.35402	3.29245	2.75758	2.11364	2.00911	1.94521	2.88578	3.08506	1.33409	0.702273
	15			3.91743	2.25	2.28311	2.09404	2.72311	2.69838	2.24138	1.34325	1.26959	1.9213	2.71096	1.51025	1.26087
	16				2.17849	1.76888	1.27231	1.42857	3.09767	2.14617	1.6	1.38851	1.37011	2.54545	2.33179
	17					2.34266	1.77367	1.49647	2.92471	2.3466	4.66513	1.28538	1.43418	1.92774
9	1					3.5518	3.0045	3.37955	3.58333	3.00466	2.70983	2.87381	3.39379	3.25641					9																		9
	2					3.14286	3.4447	3.34773	3.54524	2.68618	2.57109	2.69305	3.00241	2.88194	3.40654
	3			2.91685	2.35135	3.8686	3.66364	3.92414	3.82051	2.85579	2.38863	3.09832	3.25236	2.60959	3.49528	3.32706
	4			3.33333	3.0625	3.34676	3.42792	4.04673	3.92774	3.15036	2.61045	3.25293	3.74023	2.86437	3.04695	3.58726	2.89559
	5		4.8186	3.02697	3.16704	4.57437	3.42453	3.53538	3.91647	5.55714	6.02588		6.88837	2.72685	2.90487	3.34954	3.1713	2.08036
	6	3.19725	5.0576	2.54102	2.56502	2.17431	3.05349	4.04796	3.78759	3.74092	3.85646	3.44	3.54398	2.70208	2.60369	3.35698	2.95195	2.05843
	7	7.32258	3.45928	2.14831	2.50223	2.8051	3.12881	3.83014	3.66746	3.62077	2.91924	5	5.22406	3.40371	2.81465	2.57955	2.1183	1.91275
	8	7.025	2.72398	2.87162	6.33787	2.44342	2.64896	4.09693	3.72087	3.1401	3.71734	2.46528	6.58372	3.21296	2.68109	1.72523	1.64126	1.48206
	9	5.21968	6.18349	6.09545	2.20674	2.23502	2.29099	3.33724	3.64234	3.2512	2.45012	2.13103	2.69635	2.76835	1.6868	0.961969	1.32662	1.59417
	10	3.46911	8.37055	3.08108	1.53229	1.33333	2.06576	3.19814	3.76887	3.51059	2.52995	4.6023	2.44037	2.17273	1.01116	0.571111	1.13453	0.903371
	11	7.15278	2.91196	2.13586	2.0287	1.45815	1.8125	3.71729	4.34579	4.12615	6.72792	2.76674	2.36468	1.22072	0.483444	0.761798	1.10609	0.434004
	12	3.95571	4.92009	2.31166	3.74434	2.29054	2.23476	3.48046	4.22844	3.44394	3.3318	4.27546	1.92027	1.12918	0.888143	1.35892	1.06818	0.740991
	13	4.2331	3.63532	3.44977	3.63908	2.65977	2.32407	2.56221	2.83565	2.33718	2.25057	2.55275	6.01399	1.49099	1.6086	1.07517	0.977117	1.14612
	14		4.1555	3.16705	2.53196	2.48157	2.22222	2.96487	2.58333	1.94213	1.75	1.66279	2.91667	3.16355	1.16782	0.635321
	15			3.61949	1.94843	1.95918	1.95205	2.46544	2.41026	2.02088	1.30485	1.16589	1.82588	2.61412	1.40698	1.07798
	16				1.88036	1.52045	1.27602	1.25792	3.06497	2.00699	1.46154	1.38642	1.23598	2.33255	2.27143
	17					2.32949	1.8238	1.57011	2.78588	2.26402	3.47642	1.07529	1.32464	1.97852
10	1					3.73016	3.11486	3.43084	3.64815	3.00234	2.55792	2.56802	3.27913	3.13921					10																		10
	2					3.44	3.63678	3.52294	3.4486	2.60235	2.44076	2.44712	2.89781	2.9627	3.27166
	3			3.13004	2.55928	4.18694	3.94919	4.03926	3.53596	2.72706	2.31667	2.68258	3.19856	2.63488	3.31678	3.50831
	4			3.61574	3.19283	3.50897	3.7703	4.02546	3.91509	3.01439	2.33573	2.91284	3.38283	2.63466	3.29787	3.66509	3.03747
	5		4.81075	3.18182	3.19595	4.75058	3.5058	3.59674	3.92289	5.34466	5.61995		6.73131	2.625	2.9743	3.57683	3.33568	2.15541
	6	3.41244	5.14713	2.52809	2.75676	2.36009	2.98605	4.10979	3.83614	3.84504	3.94511	3.56542	3.60514	2.96977	2.84813	3.45455	2.9768	2.05405
	7	7.17273	3.13933	2.117	2.46532	2.88128	3.15545	4.43165	4.04535	3.87681	3.28571	5.26841	5.5493	3.44731	2.81206	2.68433	2.17701	2.05227
	8	7.37176	2.84404	2.87865	6.47489	2.5954	2.72936	4.47406	4.11491	3.29829	4.02158	2.6285	6.58837	3.4478	2.76322	1.78719	1.70183	1.63098
	9	5.33796	6.83565	6.12955	2.27027	2.43722	2.42117	3.54333	3.83051	3.66988	2.58178	2.14943	2.68046	2.73333	1.8041	0.943439	1.27991	1.59955
	10	3.52489	8.18692	3.10633	1.64667	1.34437	2.17647	3.68837	4.28947	3.80048	2.37757	4.63908	2.21412	2.04817	1.02928	0.534676	1.22122	0.876126
	11	7.30184	2.94749	2.08969	2.16779	1.53229	1.69575	4.13948	4.48131	4.22791	6.25891	2.65207	2.16284	1.21896	0.52	0.63311	1.09751	0.467416
	12	3.80374	4.71754	2.42152	4.02064	2.36866	2.07078	3.25397	4.43953	3.46911	3.42627	3.93039	1.89819	1.16779	0.835955	1.32045	1.11818	0.650113
	13	4.24582	3.52995	3.37011	3.3977	2.35253	2.20418	2.82719	3.07442	2.33028	2.2092	2.40367	5.46977	1.44898	1.46224	1.04577	1.03908	1.27045
	14		4.14081	3.18451	2.60181	2.48951	2.20746	3.15258	2.66204	1.94989	1.67202	1.4726	2.59861	2.86215	1.1709	0.610599
	15			3.86543	2.12273	2.23973	1.97483	2.74365	2.52304	2.11162	1.17931	1.14908	1.77931	2.48372	1.3871	1.17742
	16				2.09862	1.67273	1.46591	1.26087	3.0553	2.14908	1.54233	1.2746	1.2788	2.35484	2.2757
	17					2.3977	2.06378	1.48736	2.74533	2.39578	3.89977	1.12586	1.28111	2.06338

## Sheet: CV
MeanVelocity
Signals of insufficient quality were excluded from the property maps. Signals could be rejected based on noise low amplitude, large artefact or ventricluar farfields that could not be substracted.
		1	2	3	4	5	6	7	8	9	10	11	12	13	14	15	16	17
1	1					1.21876	1.06884	1.11209	1.03295	0.928994	0.961848	1.00948	1.10022	1.08603					1																		1
	2					1.26846	1.2582	1.11576	1.01841	0.986543	0.992226	1.03044	1.09576	1.11267	1.12549
	3			1.24728	1.2527	1.23727	1.18873	1.11553	1.06814	1.03787	1.06558	1.05784	1.11116	1.05064	1.08898	1.02025
	4			1.25484	1.19137	1.19037	1.10674	1.15219	1.04748	1.10222	1.06246	1.08198	1.06614	1.04854	0.993808	1.08804	1.05078
	5		1.08518	1.20852	1.28057	1.13078	1.1052	1.089	1.16584	1.10726	1.10705		0.954079	0.985272	1.00522	1.02733	1.04008	0.970308
	6	0.81758	1.03314	1.05069	1.12441	1.0084	1.04547	1.05356	1.06905	1.14075	1.15293	1.01164	0.957963	0.923352	0.92749	1.08046	0.986653	0.943549
	7	0.812472	0.98294	1.04449	1.08183	1.03432	0.980249	0.978243	0.959368	1.03933	1.06008	0.940057	0.892367	0.897001	0.963785	0.973766	0.912236	0.87775
	8	0.826274	0.966098	1.05212	1.10178	0.980087	0.892094	0.917677	0.928395	0.994193	0.983142	0.950128	0.888482	0.887926	0.98083	0.982643	0.903417	0.899976
	9	0.907094	0.957803	1.10278	1.12247	1.00739	0.90527	0.88007	0.977793	1.0362	1.07131	0.950955	0.901109	0.926125	1.00743	0.983642	0.920082	0.892263
	10	1.05308	1.09245	1.10664	1.12931	1.07686	0.987711	0.941024	0.957623	0.996685	0.991005	1.00446	1.00096	1.05084	1.07528	1.05333	0.988644	0.921923
	11	1.1381	1.14344	1.05107	1.05128	1.01519	0.89934	0.942726	1.04641	1.02265	1.04154	0.958684	0.977974	1.0958	1.16975	1.10125	1.07617	1.01355
	12	1.09275	1.00642	0.926482	1.0139	0.969535	0.825434	0.803408	0.908455	0.910971	0.920343	0.889035	0.916529	1.03223	1.08838	1.08585	1.09231	1.20409
	13	1.08485	1.0811	1.04598	0.928324	0.892913	0.842437	0.786269	0.838753	0.9539	1.00449	0.856396	0.846827	0.923218	0.988175	1.01382	1.02266	1.14361
	14		1.06132	1.01562	0.955776	0.926082	0.893822	0.797018	0.84357	0.990355	1.09065	1.04091	0.84806	0.941774	0.903697	0.952144
	15			1.11349	1.01316	0.994461	0.963928	0.889392	0.869606	0.999854	1.03084	1.03326	1.06472	1.10724	0.958984	0.976868
	16				1.02363	1.01926	0.942919	0.852327	0.818508	0.890124	0.978253	0.971312	0.966998	1.0769	1.22463
	17					1.04556	0.931592	0.838076	0.771331	0.815862	0.878679	0.940289	1.00382	1.16802
2	1					1.35009	1.1097	1.18627	1.02267	0.887358	0.930752	0.969436	1.0666	0.978058					2																		2
	2					1.26295	1.31165	1.25992	1.08597	0.938667	0.945517	0.981055	1.04875	1.01389	1.0514
	3			1.17062	1.19696	1.15046	1.22952	1.1589	1.03315	0.963785	1.01471	1.03779	1.02562	0.981584	1.03651	0.945455
	4			1.14263	1.18513	1.1696	1.07347	1.08955	0.973254	1.02628	1.06098	1.01558	1.0099	0.963677	0.985746	1.09991	0.902208
	5		1.10237	1.22091	1.2809	1.20667	1.15057	1.05977	1.08604	1.0961	1.09894		0.966753	0.942594	0.962646	1.07046	0.971615	0.879335
	6	0.913071	1.05316	1.17962	1.24866	1.0839	1.06206	1.11225	1.06074	1.07445	1.12187	0.974197	0.968879	0.957657	0.948019	0.99711	0.985435	0.838767
	7	0.809421	0.948711	1.09155	1.10107	1.05657	1.03501	0.975519	1.02354	1.0369	1.08202	0.988111	0.918744	0.917796	0.943218	0.991578	0.922864	0.833663
	8	0.817396	0.922916	1.02457	1.05667	0.925364	0.89858	0.981937	1.02049	0.993669	1.04034	0.939187	0.966387	1.00623	0.983555	0.954897	0.972782	0.866567
	9	0.869638	0.965824	1.02414	1.05302	0.940647	0.911238	0.946376	1.13998	1.11168	1.04886	1.02207	1.00925	0.998018	0.968623	1.04548	1.006	0.972913
	10	0.989905	1.04095	1.0714	1.12046	1.00051	0.942925	1.08262	1.1251	1.13683	1.05212	1.02557	1.00773	0.988024	1.0865	1.05972	1.05291	1.04236
	11	1.08772	1.016	1.02395	1.14125	1.05052	0.881813	0.981365	1.09418	1.0923	1.03778	0.955753	0.955843	1.05923	1.1365	1.13355	1.20288	1.22634
	12	1.10233	1.03951	0.919688	0.958661	0.873701	0.839748	0.812549	0.882828	1.00609	0.988477	0.997502	0.923454	1.01567	1.12585	1.18155	1.19965	1.33415
	13	0.980251	1.04474	1.03539	0.90011	0.877389	0.775532	0.794288	0.806148	0.991911	1.05942	0.974949	0.961821	0.971883	1.0034	1.14317	1.16753	1.31294
	14		1.06441	1.02013	0.972108	0.950473	0.882213	0.853021	0.828562	1.05321	1.17557	1.11167	1.03251	1.0568	1.03348	1.09431
	15			1.056	0.982868	0.942994	0.892672	0.883939	0.867255	1.01635	1.17384	1.16293	1.14469	1.25017	1.02796	1.06063
	16				1.01619	0.963767	0.877702	0.850117	0.859901	0.906751	1.02908	1.05837	1.08	1.16337	1.22682
	17					0.894862	0.829705	0.756903	0.736156	0.820853	0.974135	1.01408	1.08649	1.198
3	1					1.2689	1.17907	1.08138	1.03982	0.958923	1.02392	1.06447	1.08265	1.02594					3																		3
	2					1.24171	1.25199	1.15448	1.09643	0.999148	0.991759	1.02338	1.038	1.02624	0.951559
	3			1.20483	1.14211	1.12836	1.22999	1.14436	1.05204	1.03874	1.01555	0.954411	0.983657	0.938846	0.960293	0.948759
	4			1.15895	1.15368	1.19588	1.15041	1.14401	1.0101	1.04304	0.999585	0.961923	0.984372	0.923649	0.987901	1.02116	0.900825
	5		1.0374	1.17648	1.20835	1.17594	1.00724	0.981613	1.03848	1.05476	1.08761		0.899905	0.919928	0.948395	0.996686	0.975958	0.863582
	6	0.882339	1.09461	1.14197	1.13067	1.0591	1.00068	0.960542	0.956516	1.13867	1.14524	1.02473	0.928456	0.887283	0.910135	1.00196	0.951837	0.879607
	7	0.90417	0.987877	1.06991	1.1105	1.08391	1.00346	0.991086	0.944318	1.07147	1.05323	0.989429	0.939735	0.952539	0.951344	0.9984	0.906332	0.852906
	8	0.890253	1.00604	1.02378	1.11379	0.947832	0.928424	0.94124	0.931382	1.03106	1.02069	0.991087	0.992422	0.978485	0.97663	0.964662	0.937541	0.854199
	9	0.934552	1.02106	1.1173	1.12766	1.01493	0.972202	1.03931	1.05459	1.14954	1.10988	1.05602	1.03923	0.97374	0.947262	1.0031	0.9787	0.913931
	10	0.963734	1.04742	1.1121	1.11962	0.965879	0.895562	0.952341	1.08345	1.06251	1.02343	0.999592	1.0212	0.964768	1.05953	1.0396	0.973802	0.944935
	11	1.09905	1.10775	1.00591	1.00877	0.956883	0.857065	0.919563	0.984373	1.05519	1.06452	0.92282	0.993187	1.0089	1.12749	1.16343	1.11685	1.08383
	12	1.14744	1.05562	1.0062	0.940708	0.861034	0.801059	0.773382	0.915031	1.01858	1.0441	0.872153	0.964633	0.95774	1.0951	1.13197	1.15905	1.15962
	13	1.16732	1.11097	1.00177	0.877238	0.843215	0.843414	0.760862	0.83549	0.99879	0.99675	0.927323	0.951922	0.981692	1.00997	1.08113	1.12636	1.15051
	14		1.13954	1.0981	0.98936	0.898402	0.870821	0.813584	0.816908	1.05795	1.15999	1.09937	0.991104	0.966629	0.967463	0.966837
	15			1.1166	0.991029	0.985761	0.897648	0.893482	0.853137	0.998879	1.07213	1.06906	1.12956	1.25338	0.98057	0.995531
	16				0.963238	0.981228	0.889204	0.85569	0.834076	0.903291	1.04515	1.02024	1.09628	1.17563	1.22104
	17					0.941566	0.866541	0.873531	0.791492	0.80212	0.951916	0.993485	1.04685	1.21317
4	1					1.20018	1.09859	1.11968	1.05531	0.987102	1.01487	0.964896	1.09007	1.09881					4																		4
	2					1.22178	1.15379	1.13993	1.08606	1.03085	1.01913	0.982484	1.02405	1.07478	1.02451
	3			1.22456	1.20996	1.2237	1.26777	1.19931	1.05877	1.04877	1.03189	1.05905	1.02101	1.0024	1.08764	1.04882
	4			1.16698	1.21227	1.20617	1.15137	1.10659	1.0597	1.08218	1.07271	1.00385	1.01279	1.05345	1.06861	1.10558	1.02364
	5		1.13177	1.26343	1.24359	1.11602	1.0707	1.1069	1.07602	1.07933	1.06751		0.987739	0.946259	1.05473	1.09906	1.07411	0.885009
	6	0.965683	1.08238	1.19311	1.15618	1.05429	1.02999	1.06719	1.0645	1.09026	1.07565	0.972314	0.95751	0.940376	0.99634	1.06339	1.03797	0.978362
	7	0.961873	1.02999	1.14468	1.03941	1.0127	0.961598	1.0142	0.972119	1.02326	1.01518	0.967097	0.851412	0.893633	0.894338	0.93991	0.911249	0.856771
	8	0.953977	1.01869	1.10387	1.1559	0.994639	0.919691	1.01985	1.024	1.07632	1.03284	1.04197	0.930165	0.930355	0.912383	0.963233	0.886818	0.858276
	9	0.953776	1.0098	1.13633	1.10119	0.956817	0.916097	0.937204	0.996686	1.10078	1.1481	1.05835	1.02261	1.00351	1.04001	1.00531	0.920994	0.862381
	10	0.958308	1.08452	1.11528	1.04142	0.956123	0.897432	0.987553	1.01276	1.14818	1.13075	1.07894	0.993333	1.0052	1.07871	1.00823	1.00619	0.958522
	11	1.13889	1.08569	1.06571	1.05094	0.941111	0.856255	0.905967	0.936065	0.957738	1.11571	1.01461	0.975998	1.07268	1.17868	1.10832	1.10004	1.14209
	12	1.11388	1.05699	0.960418	0.975659	0.84827	0.875101	0.799631	0.796925	0.895495	0.946481	0.935725	0.917983	0.986832	1.08653	1.14012	1.15372	1.19725
	13	1.06182	1.03406	0.939793	0.885732	0.923644	0.811866	0.726308	0.821086	0.953982	1.0948	0.962246	0.878851	0.988997	1.04542	1.05365	1.12933	1.22264
	14		1.03874	1.11952	0.972376	0.897627	0.823455	0.756559	0.779106	0.932599	1.10425	1.09715	0.923332	0.973537	1.06533	1.00978
	15			1.09936	1.01904	0.941966	0.893592	0.824242	0.813839	0.972332	1.05116	1.12566	1.17978	1.1946	1.09736	1.06856
	16				1.04109	0.974249	0.905553	0.857743	0.83837	0.8661	0.974224	1.05563	1.14816	1.25088	1.27439
	17					0.964442	0.913401	0.83435	0.798796	0.804226	0.895084	0.983304	1.08941	1.29574
5	1					1.19937	1.09053	1.01017	0.941423	0.952838	1.00116	1.00166	1.05274	0.908291					5																		5
	2					1.27034	1.19957	1.16243	1.05223	0.965458	1.06592	0.966372	0.983617	1.00042	0.999732
	3			1.19427	1.21225	1.28318	1.29545	1.23963	1.12415	1.02726	1.08581	0.997377	1.05782	1.03652	1.03143	0.993059
	4			1.26096	1.24011	1.267	1.16342	1.22005	1.15978	1.07523	1.07875	1.01354	1.01741	0.965961	1.06433	0.960284	0.919378
	5		1.18099	1.22233	1.23212	1.26151	1.18407	1.1422	1.16674	1.06117	1.04276		0.958053	0.985048	1.00311	1.00688	0.96643	0.877166
	6	1.01741	1.18525	1.16455	1.22534	1.17634	1.07569	1.13807	1.10262	1.06877	1.10412	1.01098	0.949584	0.903039	0.921912	1.07422	0.972044	0.899739
	7	0.964567	1.02137	1.08389	1.12033	1.1587	1.0172	1.02753	1.00532	1.06677	0.993615	0.940811	0.90863	0.908093	0.893287	0.935608	0.897666	0.849979
	8	0.905419	0.99159	1.08114	1.12982	1.02402	0.873592	1.00589	1.04797	1.03444	0.969857	0.950318	0.954471	0.936437	0.944502	0.944172	0.906603	0.818259
	9	0.987012	0.952476	1.02094	1.04341	0.977199	0.877933	0.939761	1.08855	1.04873	1.02215	0.992697	0.959366	0.947963	0.966107	0.937097	0.909967	0.830434
	10	0.991521	1.10686	1.0631	1.08103	1.01992	0.903808	0.975967	1.10679	1.04288	1.0003	1.01845	1.01652	0.933653	1.09066	1.04636	0.969657	0.899202
	11	1.15474	1.15494	1.04307	1.13447	1.02027	0.883383	0.942119	1.03394	1.04382	1.04049	1.06176	1.04109	1.09375	1.19168	1.12337	1.08835	1.07605
	12	1.14712	1.00904	0.994113	0.959874	0.873558	0.841423	0.794668	0.875376	0.951382	0.98801	0.878119	0.9801	1.04678	1.12065	1.16276	1.17214	1.27055
	13	1.04918	1.02647	1.00064	0.921048	0.859826	0.81783	0.756374	0.868507	1.02094	1.09095	0.963664	0.867981	0.974602	1.0845	1.10453	1.13865	1.25155
	14		1.07304	1.00944	0.933093	0.905193	0.839972	0.813817	0.823171	1.01825	1.15375	1.07683	0.949485	1.03572	1.02564	0.977947
	15			1.03482	1.02004	0.947096	0.865986	0.859585	0.854473	0.941079	1.06348	1.08264	1.16916	1.27299	1.00131	0.95384
	16				1.00239	0.938933	0.891548	0.826504	0.847821	0.845402	1.00538	1.04791	1.11437	1.2102	1.27242
	17					0.917229	0.836861	0.782871	0.769939	0.777696	0.872363	1.0032	1.07685	1.20322
6	1					1.17619	1.05463	1.07425	1.03801	0.974083	1.01158	1.06585	1.12561	1.11517					6																		6
	2					1.14476	1.22849	1.16132	1.01718	0.965096	1.04362	1.06803	1.10666	1.06928	1.03063
	3			1.10286	1.12732	1.14518	1.21038	1.3207	1.01811	0.966709	1.03871	1.02523	1.03209	1.04669	1.00293	0.924028
	4			1.15002	1.12093	1.15402	1.1592	1.21888	1.05705	1.04101	0.969846	0.928196	1.01592	0.946097	0.954881	1.06438	0.976906
	5		1.15915	1.25855	1.20685	1.2194	1.09579	1.05121	1.04071	1.02172	1.05396		1.00587	0.894872	0.940318	1.01508	0.998964	0.858559
	6	0.979044	1.13834	1.188	1.18465	1.06847	0.952104	0.975191	0.991884	1.09007	1.10394	1.01092	0.941548	0.878439	0.92718	1.06832	1.02038	0.95017
	7	0.941546	1.05884	1.1341	1.18119	1.09676	0.948962	0.911669	0.957539	1.04504	1.0243	0.958869	0.9312	0.907424	0.926007	0.977467	0.973789	0.901404
	8	0.894165	1.0327	1.08476	1.15009	0.981078	0.83684	0.899625	0.948482	0.961264	0.943979	0.951136	0.942027	0.95879	0.974082	0.996807	0.961481	0.910168
	9	0.919458	1.04874	1.14732	1.17716	0.984619	0.889359	0.865887	0.959856	1.13199	1.09391	0.987612	0.957962	0.96689	1.0007	0.981958	0.972593	0.895002
	10	0.978909	1.08657	1.11402	1.11411	1.03072	0.936381	0.957298	1.01059	1.04318	1.08461	0.963638	0.982972	0.968872	1.04362	0.973517	0.975579	0.922067
	11	1.14626	1.15631	1.08508	1.11497	1.00552	0.851014	0.897495	0.979156	1.02739	0.957965	0.927788	1.02747	1.07404	1.15563	1.0796	1.11441	1.06889
	12	1.13122	1.03975	0.981379	1.03021	0.910443	0.818532	0.848669	0.914268	0.904671	0.960262	0.886919	0.985931	1.10574	1.09078	1.07679	1.11417	1.18037
	13	1.08956	1.06265	1.07119	0.96061	0.926518	0.840725	0.822813	0.855568	0.958182	1.04686	0.950067	0.988565	1.05381	1.03278	1.01358	1.07717	1.1888
	14		1.04849	1.09742	1.04828	0.933113	0.923688	0.859531	0.873833	0.971288	1.04472	1.10164	0.994988	1.01473	0.947042	0.955182
	15			1.08298	1.05021	1.0619	0.930383	0.882174	0.862982	0.969549	1.04384	1.17212	1.21507	1.24151	0.984307	0.907105
	16				1.1023	1.10108	0.903975	0.835055	0.839948	0.945016	0.999985	1.08943	1.11185	1.12291	1.18547
	17					1.0844	0.915549	0.826338	0.824492	0.821672	0.92749	1.05827	1.12722	1.23222
7	1					1.25896	1.06908	1.03271	0.991903	0.920904	0.950174	0.973522	1.05555	0.998599					7																		7
	2					1.26784	1.15475	1.17374	1.04014	0.951342	1.0385	1.03122	1.05382	1.03431	0.987739
	3			1.09211	1.20774	1.19125	1.2085	1.2337	1.10915	1.0129	1.03465	1.02335	1.02753	1.06912	1.02097	0.983608
	4			1.09305	1.0792	1.17534	1.09345	1.08021	1.09815	0.968419	0.992891	1.0564	1.04063	1.03315	1.05676	1.06199	0.903327
	5		1.09172	1.20662	1.13786	1.06036	1.0051	1.06263	1.14081	1.08818	1.05551		1.01597	0.957876	1.01468	1.07161	1.02034	0.842529
	6	0.931603	1.08611	1.09774	1.02805	0.997142	0.999818	1.08475	1.17287	1.12979	1.14223	0.993558	0.944989	0.973394	0.964477	1.0191	0.960096	0.859074
	7	0.903823	1.00098	1.03748	1.05634	0.922265	0.908308	1.03356	1.06564	1.13885	1.06235	0.979719	0.977375	0.94201	0.967725	1.00653	0.92835	0.871636
	8	0.895052	0.992506	1.1367	1.07917	0.967977	0.92129	0.985904	1.06625	1.02934	1.04134	1.05418	0.996918	0.960123	0.975588	1.09615	1.0194	0.932422
	9	0.926894	0.998392	1.09206	1.08302	1.02464	0.990037	1.04545	1.01759	1.06521	1.07531	1.02459	1.04616	0.951573	1.05644	1.05012	1.07506	1.01815
	10	0.937949	1.0182	1.05233	1.07587	0.958406	0.893707	0.921142	0.987898	1.05623	1.05087	1.05852	1.09229	1.03655	1.08788	1.11288	1.04766	1.01879
	11	1.09269	1.08994	1.0572	1.0714	0.954529	0.855614	0.826331	0.944961	1.03052	1.03469	1.02043	1.04144	1.11166	1.17358	1.16289	1.17602	1.18329
	12	1.07735	0.994521	0.969374	0.978035	0.863675	0.805179	0.757038	0.834846	0.944965	0.940934	0.90472	0.973664	1.1074	1.07437	1.20953	1.21482	1.33475
	13	1.10326	1.05687	1.00961	0.913468	0.829683	0.768907	0.749266	0.851619	0.947132	1.022	0.936848	0.935745	1.03848	1.04315	1.1052	1.13661	1.31277
	14		1.03745	1.00512	0.96154	0.884941	0.78797	0.817553	0.833795	0.98872	1.09428	1.12003	0.986974	1.08329	1.00822	1.06551
	15			1.11387	0.984406	0.995874	0.902051	0.883439	0.91338	1.02386	1.1495	1.16344	1.19376	1.25701	1.05651	1.08493
	16				1.01139	1.01903	0.944717	0.903453	0.92392	1.0183	1.13844	1.12096	1.0852	1.19463	1.3541
	17					0.946367	0.886582	0.834671	0.815045	0.949161	0.990378	1.08163	1.10942	1.35184
8	1					1.22767	1.10559	0.994263	1.0588	0.935216	0.97662	0.966001	0.983778	0.961606					8																		8
	2					1.24584	1.17512	1.05477	1.13956	0.993197	1.05692	0.965344	0.982061	1.02701	1.03364
	3			1.24082	1.13559	1.14063	1.16477	1.1281	1.07728	1.03729	1.10574	1.00631	0.996353	0.986158	1.0664	1.10168
	4			1.17909	1.18887	1.11849	1.13683	1.11908	1.06068	1.03497	0.98812	1.06648	0.932444	0.972384	0.984006	1.10359	0.946766
	5		1.1795	1.2386	1.21258	1.16116	1.12413	1.07473	1.06731	1.06955	1.12844		1.00785	0.983159	1.01529	1.10048	0.99316	0.817293
	6	0.938392	1.11087	1.22431	1.27619	1.10434	1.02537	1.07347	1.03101	1.07925	1.11564	1.02122	0.951471	0.940384	0.954246	1.07833	0.986542	0.841368
	7	0.936987	1.04053	1.1385	1.24422	1.14596	1.01598	1.01758	0.936072	1.07905	0.998377	1.05864	0.985837	0.924111	0.913177	0.980476	0.936857	0.854121
	8	0.882776	1.05162	1.21188	1.16869	1.01464	0.941128	0.945201	0.985023	1.04349	1.00504	1.03373	0.936365	0.91844	0.978252	0.925353	0.926816	0.840525
	9	0.994659	0.986011	1.20943	1.18453	1.07032	0.972453	1.01036	1.01911	1.1226	1.09729	1.09493	1.04771	0.957818	1.0318	0.955244	0.921721	0.887499
	10	1.06572	1.06623	1.2101	1.10136	1.05697	1.00278	1.00889	1.09537	1.01543	1.06098	1.02165	1.01353	0.98209	1.0185	1.04076	1.01727	0.983356
	11	1.111	1.10346	1.13783	1.08677	1.04078	0.888664	0.97193	1.04977	1.08584	1.13177	0.969126	0.991706	1.04017	1.1294	1.08326	1.08347	1.0237
	12	1.12665	1.04791	0.998687	1.02232	0.950475	0.844321	0.784383	0.909745	1.00566	0.963832	0.949444	0.97933	1.03377	1.0851	1.12653	1.13461	1.25403
	13	1.12084	1.14728	1.04475	0.954409	0.91089	0.80346	0.769315	0.839862	1.05176	1.01595	0.94445	0.904953	0.960583	1.07592	1.04793	1.06492	1.20789
	14		1.03858	1.09491	0.987404	0.986893	0.817508	0.788889	0.808886	0.994072	1.16212	1.07051	0.973036	0.976298	0.996666	1.0065
	15			1.12882	1.05382	0.961557	0.901839	0.87388	0.81082	0.956539	1.08321	1.11333	1.13594	1.18843	1.04919	1.02003
	16				1.04915	1.00388	0.877034	0.822413	0.843623	0.869724	0.973655	1.02434	1.13606	1.13219	1.19205
	17					0.932117	0.841182	0.766318	0.730253	0.783098	0.878747	0.98698	1.17883	1.19875
9	1					1.2609	1.13187	1.12084	1.03814	0.914435	1.02324	1.02387	1.09716	1.10047					9																		9
	2					1.31494	1.25451	1.1612	1.06702	0.935734	1.11584	1.01561	1.13715	1.09386	1.15892
	3			1.30894	1.25255	1.20935	1.23697	1.18473	1.02059	0.99634	1.11008	1.0631	1.09501	0.983676	1.09868	1.01756
	4			1.19029	1.26652	1.17154	1.15862	1.08014	0.983976	0.996462	1.117	1.03045	1.05098	0.966705	1.03908	1.05762	0.898962
	5		1.1255	1.23948	1.26625	1.12478	1.09272	1.11223	1.09377	1.02863	1.09781		1.06964	1.01009	1.08248	1.01991	0.92733	0.817471
	6	0.96927	1.06572	1.14858	1.18893	1.03536	1.04607	1.13655	1.01303	1.09579	1.28265	1.02876	1.02397	0.951055	0.952348	1.0648	0.980394	0.844749
	7	0.955608	1.07775	1.10286	1.17243	1.11221	1.0503	1.0167	1.00878	1.08412	1.10722	1.02843	0.94923	0.946748	0.955597	1.00146	0.899213	0.829302
	8	1.0086	1.07699	1.11461	1.13739	0.989112	0.969253	1.05317	1.03649	1.01061	0.983518	0.948442	0.957563	0.96847	1.03986	0.996927	0.995619	0.896511
	9	0.981036	1.05188	1.15218	1.15192	1.05156	1.05095	1.01701	1.08067	1.1376	1.06861	1.03007	1.02815	0.949394	1.02588	1.01488	0.974075	0.933538
	10	1.07871	1.12561	1.16483	1.18283	1.0864	0.97382	1.01595	1.09135	1.1533	1.03972	0.995891	0.987385	1.06238	1.12042	1.053	1.03696	0.98101
	11	1.17883	1.16805	1.10151	1.15141	1.06627	0.943384	0.966564	1.07806	1.05791	1.01843	1.00218	1.0167	1.08867	1.11409	1.12792	1.15425	1.16045
	12	1.1901	1.07215	1.00142	1.05354	0.975559	0.829788	0.771479	0.942567	1.01411	1.00455	0.95067	0.904458	1.03735	1.10698	1.10316	1.13096	1.26508
	13	1.11564	1.07542	1.02325	0.957023	0.8751	0.803184	0.774277	0.843421	1.01015	1.09075	0.949853	0.944968	0.968108	1.04986	1.03987	1.07221	1.16347
	14		1.13893	1.00046	0.986213	0.931216	0.87584	0.825382	0.876433	1.15174	1.20761	1.10746	0.951334	1.01841	0.993639	0.968947
	15			1.12411	1.04479	0.989758	0.963769	0.88718	0.846263	1.05707	1.20404	1.14198	1.11677	1.2443	1.01448	0.967416
	16				1.082	1.01494	0.879593	0.822468	0.851739	0.895385	1.04705	1.04689	1.07875	1.16176	1.29855
	17					0.962523	0.835463	0.80009	0.78445	0.78246	0.944349	1.0084	1.10449	1.21271
10	1					1.20204	1.13636	1.04171	1.00799	0.965485	0.97249	1.08992	1.11451	1.07175					10																		10
	2					1.22645	1.21424	1.18549	1.0763	1.00452	1.05241	1.05722	1.0322	1.04063	1.05374
	3			1.17823	1.21121	1.20658	1.15601	1.20796	1.08571	0.99012	1.03729	1.06	1.03434	1.05667	1.06742	0.978085
	4			1.1372	1.22439	1.1982	1.13066	1.17839	1.10412	1.02725	1.04473	0.999912	1.00847	1.03435	1.04431	1.05861	0.920796
	5		1.10997	1.19649	1.23707	1.13454	1.11155	1.09107	1.14044	1.08529	1.13738		1.03026	0.968764	0.996225	1.02461	0.983032	0.822837
	6	0.970212	1.11454	1.16777	1.18873	1.05607	0.973466	1.01054	0.988972	1.05204	1.0898	1.01553	0.940828	0.915695	0.966915	1.06028	0.960877	0.87552
	7	0.929903	1.01523	1.08022	1.13958	0.96098	0.876347	0.919231	0.851302	1.05359	1.0403	0.999838	0.902239	0.936949	0.953073	1.02169	0.971942	0.873767
	8	0.880238	0.965001	1.00794	1.08491	0.899788	0.820374	0.891411	0.927587	0.986029	1.06906	1.00806	0.967675	0.946956	0.941826	0.949031	1.01774	0.944211
	9	0.885491	0.972457	1.08543	1.04662	0.9438	0.872428	0.906187	0.942419	1.05357	1.03503	1.08001	1.05449	0.968507	1.03083	0.994921	1.02288	0.960667
	10	0.988413	1.07466	1.1166	1.12971	0.978746	0.863509	0.915822	1.00576	0.97693	1.00535	1.08227	1.05198	1.00283	1.10693	1.03685	1.09264	1.07985
	11	1.13566	1.07552	1.05232	1.12349	1.05734	0.840961	0.898348	0.974315	1.08227	0.974033	0.984006	0.999118	1.1024	1.21182	1.13158	1.18313	1.17445
	12	1.17485	1.10182	0.978312	0.999333	0.961394	0.843456	0.800541	0.936145	0.980881	0.992045	0.928341	0.961611	1.05314	1.1154	1.15248	1.17201	1.29093
	13	1.1956	1.13963	1.05863	0.952222	0.910388	0.828965	0.79323	0.840395	0.991752	1.06765	0.957767	0.924639	1.00591	1.11106	1.03626	1.10594	1.27296
	14		1.15498	1.06944	0.982389	0.993859	0.839284	0.806299	0.920596	0.989538	1.21241	1.1294	1.02832	1.01522	0.97905	1.01127
	15			1.07527	0.992629	0.991611	0.909858	0.87773	0.822829	0.956825	1.07277	1.08524	1.18568	1.2004	0.977088	0.955016
	16				1.00278	0.970189	0.893309	0.817444	0.830126	0.841023	1.03939	1.01929	1.13427	1.14949	1.20187
	17					0.977674	0.853487	0.76499	0.738376	0.749606	0.910693	0.991906	1.05336	1.23417

## Sheet: Pref
Preferentiality
Signals of insufficient quality were excluded from the property maps. Signals could be rejected based on noise low amplitude, large artefact or ventricluar farfields that could not be substracted.
		1	2	3	4	5	6	7	8	9	10	11	12	13	14	15	16	17
1	1					1.60912	1.44857	1.78441	1.1135	1.26207	1.50756	1.36653	1.50338	1.54961					1																		1
	2					1.23962	1.27623	1.43947	0.947136	1.33056	1.48366	1.30692	1.49442	1.48308	1.64907
	3			1.24777	1.28418	1.29985	1.04314	1.80387	1.0377	1.29942	0.734071	0.525323	0.705085	1.0274	1.39314	2.35115
	4			1.22542	1.24349	1.26628	1.10495	1.56417	1.57594	2.09061	2.18154	2.65224	0.830076	1.02452	0.719352	2.3247	2.40877
	5		0.00531242	1.80568	1.37214	1.48145	0.574344	1.51704	2.21012	2.17556	2.11664		0.811737	0.915586	0.898277	1.41598	2.3159	2.28169
	6	3.1085	2.81106	2.03488	1.55989	1.2807	0.262656	2.67031	2.43141	2.15018	2.12177	2.09402	1.46426	1.07611	1.14797	1.47384	1.85124	2.26089
	7	2.81462	2.64443	2.10368	1.70431	1.12771	2.60016	0.000216181	2.56072	0.289979	0.891468	1.69287	1.64831	1.35223	1.30375	1.67418	1.93421	2.10715
	8	2.66076	2.34562	1.99538	1.61146	1.32785	2.95649	2.98447	0.0044866	0.190949	1.05548	1.39973	1.39969	1.28116	1.38509	1.85672	2.06373	2.24317
	9	2.62241	2.17331	1.93904	1.66769	1.78769	2.91468	2.85347	3.06323	3.0508	0.955039	0.889124	0.898287	1.06765	1.60939	2.23746	2.38263	2.53138
	10	2.91069	2.31659	1.97774	1.91349	2.03367	3.00733	2.96303	2.88455	2.74779	0.410268	0.420437	0.511698	0.735089	2.31186	2.5239	2.69878	2.95512
	11	2.93586	2.17725	2.06816	1.77581	1.61338	0.0153152	3.10516	2.70733	2.43575	2.5282	3.11206	2.98945	2.68739	2.63512	2.93355	0.232274	0.219685
	12	2.8896	2.17372	1.92947	1.67007	1.44393	1.36412	0.109798	0.24932	2.145	2.37518	2.66161	2.75272	2.47911	2.52615	0.446453	0.512077	0.451914
	13	2.71523	2.00658	2.02173	1.78548	1.58414	1.54703	3.12228	0.162243	2.24142	2.29838	2.45605	2.55585	2.39199	1.46813	0.871015	0.946506	0.808878
	14		2.01075	1.94217	1.74229	1.62537	0.580854	3.07975	3.08257	2.43167	2.17559	2.46328	2.5752	2.50134	1.5854	1.17617
	15			2.03869	2.00814	1.94228	0.674163	2.98072	2.80535	2.45236	2.03555	1.51039	0.0977217	2.74014	2.78947	1.48191
	16				1.54464	1.72611	0.716148	0.0994405	2.69793	2.33584	1.80371	1.37437	0.779176	3.13522	2.80602
	17					1.67712	1.35997	0.233718	2.56441	2.11746	1.71261	1.40442	0.99635	0.352682
2	1					1.88234	2.11664	1.49358	1.04321	1.42766	1.75459	1.33954	1.38409	1.59502					2																		2
	2					1.33161	1.14103	0.426744	0.86409	1.13526	0.825974	0.739851	1.34018	1.0212	1.6527
	3			1.29406	1.35696	1.50973	1.06557	0.985707	1.1295	0.342548	1.05299	0.818679	1.00413	1.10393	1.46157	2.13989
	4			1.04759	1.33164	1.45851	1.19826	0.730287	1.40764	1.6041	1.48131	0.788169	1.01348	1.05288	1.20602	1.7515	2.37444
	5		0.473366	1.37649	1.4174	1.434	1.09471	0.466242	2.11962	1.53686	1.61561		0.942335	1.18075	1.06045	1.36916	1.88084	2.30326
	6	2.88881	2.79042	2.49713	2.25671	1.54673	1.02742	0.220714	2.48222	1.76191	1.57101	1.2604	1.08551	0.916119	1.10937	1.31286	1.56834	2.23453
	7	2.68376	2.54308	2.34988	2.12352	1.74061	2.49953	2.95686	0.297777	0.344722	1.0454	1.13055	1.19481	1.15282	1.1482	1.50233	1.71513	2.05676
	8	2.60379	2.44519	2.10829	1.78253	1.90602	2.75574	3.07984	0.102107	0.46595	0.686023	1.10925	1.0722	0.979579	1.33703	1.69872	1.96467	2.41339
	9	2.57967	2.2433	1.901	1.70757	2.05734	2.90442	2.86182	3.04712	0.00042809	0.140738	0.436588	0.857217	0.791482	1.37975	2.12266	2.33691	2.65711
	10	2.77674	2.19435	1.76301	1.76373	2.1648	2.8709	2.96633	2.9247	2.86371	2.94596	0.0585898	0.475688	0.810901	2.0015	2.53837	2.673	2.95255
	11	0.285677	1.71076	1.72343	1.61329	2.06894	2.81503	3.01827	2.69464	2.82137	2.81748	3.09269	0.190241	0.336948	2.90181	2.889	0.122308	0.21301
	12	2.81887	1.53624	1.6254	1.66538	1.74632	1.65679	0.667517	2.45499	2.08296	2.3602	2.89971	0.0173473	2.63039	0.0229669	0.224598	0.34815	0.34751
	13	2.64578	1.50075	1.75207	1.56818	1.4994	1.7582	0.0694423	2.92394	2.33838	2.05483	2.40353	2.70676	2.4774	2.91435	0.449867	0.619468	0.58867
	14		2.56807	1.73418	1.58177	1.48665	1.8487	0.0822165	2.99329	2.45017	2.23784	1.76273	2.76398	2.61957	2.89958	0.691699
	15			2.17306	1.74033	0.13535	2.72168	3.001	2.89245	2.52747	1.8895	1.22497	0.28562	2.99095	2.99561	1.05376
	16				1.79826	0.78636	0.538729	0.0156554	2.77073	2.37749	1.70435	1.27921	0.678341	0.145258	2.9157
	17					1.67393	1.38747	0.618506	2.75404	2.19622	1.81018	1.3954	0.993534	0.26053
3	1					1.53624	0.762463	1.92995	1.15141	1.30378	1.74127	0.631279	1.35979	1.76504					3																		3
	2					1.37002	1.54311	2.95093	2.7009	2.11007	2.12818	0.552232	1.14825	1.996	1.8801
	3			1.37128	1.46281	1.3559	0.779206	0.0210495	2.79029	2.23628	1.46766	0.434379	0.820507	1.2476	1.76661	1.96914
	4			1.44398	1.40356	1.32469	0.1461	2.80598	2.49001	2.11232	1.74097	0.449953	0.78686	0.997781	1.3824	1.67629	2.23141
	5		2.6733	1.76612	1.63289	1.73384	3.0889	2.85727	2.38845	2.20252	1.78546		1.56489	1.26031	1.23067	1.14764	2.20837	2.46326
	6	2.95789	2.66975	2.49248	1.52529	1.11485	2.19856	2.52703	1.97954	1.75453	1.66989	1.29568	1.14704	1.04656	1.22965	1.31725	1.7598	2.23571
	7	2.71988	2.67057	2.36338	1.52568	1.35307	3.12601	2.74359	0.0834629	2.76208	1.42298	1.31473	1.1848	1.175	1.20947	1.38406	1.82768	2.17811
	8	2.74444	2.41296	2.04816	1.69994	1.4282	0.087444	0.0276172	0.00761708	3.0873	0.668981	0.962787	1.02652	1.18145	1.11037	1.52401	1.83908	2.3904
	9	2.61521	2.28194	1.80451	1.61365	1.6956	0.100474	3.04053	2.91955	2.95601	0.117565	0.416863	0.394592	0.597389	1.09052	2.04358	2.45075	2.82521
	10	0.00228789	1.55352	1.79527	1.58897	1.26186	0.0507872	2.97674	2.92499	2.99931	0.57191	0.474403	0.606271	0.695026	0.617598	2.80441	2.93763	3.12313
	11	0.400081	1.91728	1.73102	1.51657	1.32046	0.699201	0.197433	3.07587	2.86254	2.57129	0.12819	0.0813552	3.10883	0.00977222	3.12512	0.170327	0.168819
	12	1.93595	1.69161	1.69652	1.65296	1.35946	1.06293	0.267393	0.0760066	1.97133	2.33765	2.91832	2.62353	2.87096	0.0406532	0.229718	0.389522	0.330534
	13	2.2207	1.82057	1.76557	1.4996	1.68742	1.76587	2.6807	2.81849	2.41027	2.21528	2.54254	2.58006	2.30615	2.52721	0.675934	0.717627	0.410042
	14		2.4478	1.39195	1.43277	2.01443	2.19673	2.70463	2.83632	2.39681	2.18322	2.57643	2.64875	2.45983	2.12523	1.37647
	15			1.02358	0.861229	3.11977	2.86471	2.98443	2.82488	2.40567	2.03143	1.39845	0.605883	2.79906	2.37942	1.8638
	16				1.46978	2.26306	0.14771	0.0686251	2.85059	2.42865	1.84062	1.36641	0.902791	0.296715	2.84784
	17					1.6558	0.641122	0.139052	2.86336	2.06596	1.85058	1.48811	1.07748	0.5805
4	1					1.44287	1.64277	1.52288	1.62276	1.60461	1.70296	1.16388	1.44491	1.74888					4																		4
	2					0.985501	1.46596	1.18697	1.58869	1.49541	1.66718	0.828282	0.958093	1.46597	1.85594
	3			1.44007	1.33206	1.24609	1.15548	1.68345	2.2418	1.82027	1.17998	0.504753	0.862373	1.02133	1.61309	2.05283
	4			1.5898	1.45411	1.50763	1.60206	2.16153	2.14222	2.17439	1.89678	0.638515	0.705513	1.05127	1.31182	2.0042	2.36174
	5		1.95906	1.82244	1.60559	1.66999	1.36077	2.52509	2.02233	1.90349	1.83692		0.810991	1.32631	1.17431	1.25588	1.93465	2.30318
	6	2.8727	2.53961	2.14337	1.85075	2.66418	3.0498	2.46798	2.20395	1.73594	1.73505	1.96238	1.26056	1.15914	1.20263	1.32478	1.63838	1.94611
	7	2.71464	2.49787	2.22589	1.71522	1.68635	2.94211	2.67677	2.65472	1.77069	1.0685	1.55425	1.60057	1.22096	1.43539	1.45409	1.60542	2.08713
	8	2.55295	2.23925	1.79288	1.61345	1.83118	3.07391	2.71099	3.03187	0.277354	0.85916	1.10926	1.78473	1.3592	1.39026	1.65626	2.03954	2.37088
	9	2.3711	2.10627	1.76947	1.73088	2.3835	2.86573	2.8796	3.0089	0.0605213	0.447776	0.61724	0.517788	0.568209	1.65587	2.06481	2.332	2.58016
	10	3.05361	2.52997	1.73532	1.61294	2.00045	2.8301	2.80204	2.92588	2.89825	0.397749	0.387271	0.309147	0.310036	2.14857	2.43783	2.88509	3.10709
	11	0.255367	1.82216	1.72832	1.58073	1.73313	0.696632	0.099463	2.98179	2.54958	2.19324	3.06235	3.06443	2.95733	0.254679	0.000294106	0.257268	0.211084
	12	3.09853	1.70543	1.52774	1.56078	1.49413	1.32709	0.36511	0.0884825	2.2135	2.13518	2.80648	2.67762	2.69542	0.519197	0.505875	0.415243	0.317991
	13	2.76126	1.63362	1.50548	1.54015	1.64264	1.99563	0.394208	0.108125	2.44973	1.96324	2.42122	2.61704	2.3332	2.21714	0.764324	0.69274	0.39614
	14		2.15588	1.18724	1.33486	1.40089	1.48122	3.03735	2.94181	2.54008	2.24858	2.12228	2.62415	2.49552	2.42956	1.11737
	15			1.08278	0.96175	1.32757	1.72289	3.02265	2.84644	2.52538	2.23156	1.47282	0.307991	2.96643	2.7747	1.77674
	16				1.48319	1.51295	2.99524	3.06863	2.83061	2.4603	1.93115	1.36796	0.620427	0.203978	2.89552
	17					1.73885	1.39533	0.0631221	2.77994	2.36661	1.93682	1.53765	1.07027	0.451191
5	1					1.76607	1.9124	2.07434	1.80165	1.61673	1.79902	0.994727	1.47938	2.06816					5																		5
	2					1.59327	1.99769	2.57701	2.07576	1.90258	1.70655	0.649144	0.203377	2.23228	2.07183
	3			1.33954	1.37914	1.49768	2.22713	2.68182	3.10323	0.49042	0.774153	0.349222	0.158055	0.34526	1.5817	2.11706
	4			1.36603	1.57844	1.37581	1.12306	2.74157	2.64612	2.19246	2.35852	0.235047	0.263184	0.790892	1.19844	1.89076	2.0524
	5		0.413644	1.56961	1.54286	1.59263	0.629711	0.225938	2.58039	1.99736	2.03106		0.676517	1.04282	1.03735	1.50418	1.94135	2.15865
	6	3.02834	2.43094	1.88975	1.71928	1.46897	0.523754	0.00623623	2.36439	1.93051	1.80523	1.29426	0.540274	0.792009	0.901329	1.25706	1.96052	2.30095
	7	2.52632	2.4159	2.1228	1.48373	1.5998	2.51067	2.40709	2.00477	1.01476	1.38754	1.09645	1.03669	0.9996	1.09276	1.55658	1.87384	2.37921
	8	2.3747	2.33325	1.9022	1.64277	1.57561	2.58808	2.91264	0.436919	0.454801	0.653048	0.972283	1.26925	1.05825	1.15211	1.52455	2.05898	2.56254
	9	2.44286	1.81027	1.63341	1.55743	1.71436	2.93341	2.93888	3.05752	0.219145	0.582796	0.671263	0.79461	0.761358	1.33707	2.01141	2.27814	2.70022
	10	3.08254	0.467663	1.50032	1.57369	1.7037	2.91526	3.0254	2.94222	0.0054903	0.789314	0.932754	0.629783	0.560952	1.6215	2.43995	2.74099	2.97055
	11	0.279834	1.6624	1.50896	1.43191	1.34597	0.520775	0.0216173	2.66582	1.76771	3.02445	0.128906	0.363035	0.592186	0.038072	2.94953	0.174314	0.157868
	12	2.89076	1.83337	1.58351	1.52354	1.42608	1.00751	0.107539	0.979312	1.73173	1.80174	2.8305	2.85537	0.188298	0.386206	0.367319	0.382437	0.342702
	13	2.7	1.72115	1.42735	1.45286	1.48496	2.01384	0.0317332	3.02465	1.76293	1.70568	2.87693	2.70318	2.62038	0.4446	0.706405	0.615683	0.363724
	14		2.31678	1.45615	1.2984	1.63494	2.08677	2.76412	2.86638	2.28628	2.23578	0.268759	2.73215	2.41448	1.54176	1.00691
	15			1.5518	0.433805	2.55806	2.9357	3.00513	2.84582	2.60112	1.71627	0.904637	0.666873	3.06259	0.0240201	1.03348
	16				1.64016	1.56727	2.74643	3.10153	2.79179	2.51436	1.58836	1.17043	0.687005	0.308809	2.92084
	17					1.69672	1.75971	2.91437	2.6529	2.16954	1.66914	1.3728	1.0238	0.530811
6	1					1.24922	1.15523	1.12108	0.979973	1.49455	1.82917	2.13184	1.74606	2.12858					6																		6
	2					1.12505	0.947202	0.777506	0.4937	0.851369	2.17732	2.8048	0.357741	0.687647	1.1998
	3			1.29084	1.21036	1.13706	0.804747	0.985918	0.413944	0.295083	2.17584	3.10978	0.646714	0.653715	0.768359	1.93715
	4			1.45329	1.39488	1.34857	0.985081	1.08991	3.01973	2.35735	1.92468	2.82089	0.946061	0.878195	1.29378	1.53318	2.05077
	5		1.45344	1.59868	1.53182	1.4397	0.94091	0.564858	2.64944	2.21944	1.74384		1.19127	1.20137	1.17263	1.32661	1.75906	2.22214
	6	2.9643	2.43048	1.76808	1.54334	1.27878	0.992645	0.68484	1.31913	1.55724	1.73847	1.727	1.54095	1.27333	1.16288	1.2907	1.64444	2.11899
	7	2.78705	2.54631	2.15416	1.75298	1.81497	2.68567	0.211172	3.02864	1.23245	1.15819	1.2742	1.42176	1.36695	1.28914	1.46031	1.70226	2.13767
	8	2.69379	2.37544	1.78626	1.50468	1.30529	3.08146	2.7166	0.0539497	0.432714	0.987943	1.1206	1.27078	1.31411	1.35857	1.67879	2.03986	2.34684
	9	2.75378	2.42921	1.67751	1.55346	1.68017	3.01761	2.97717	2.96507	0.0175124	0.521628	0.527705	0.605474	0.837339	1.64283	2.12612	2.34746	2.63101
	10	0.376321	0.42633	1.35457	1.56577	1.15609	3.00635	2.94438	2.83083	3.10549	0.245789	0.418725	0.497973	0.670901	1.93105	2.48502	2.84975	3.0337
	11	0.346293	1.91157	1.45542	1.43624	0.878637	0.274246	0.103083	3.08977	3.09572	0.193824	0.146556	3.09232	3.08353	2.57921	2.96116	0.0802496	0.154008
	12	0.182708	1.54152	1.60617	1.57484	1.29747	0.902711	0.501487	0.138317	2.45197	2.19693	2.77327	2.85646	2.64578	0.103376	0.25044	0.321798	0.220936
	13	1.98579	1.5103	1.61899	1.56032	1.52144	1.58125	0.335444	3.01517	2.63335	1.8883	2.64005	2.706	2.52684	0.0698514	0.58713	0.60958	0.221737
	14		1.75635	1.38951	1.18956	1.51773	2.28412	2.88931	2.94007	2.74606	2.10339	2.01959	2.61156	2.45452	2.10671	0.977636
	15			1.99413	1.18628	2.80906	2.96429	2.9382	2.72569	2.7232	1.96767	1.38221	0.69355	2.80161	2.53786	1.5052
	16				1.54549	1.47283	0.00480246	3.13033	2.78616	2.51819	1.63556	1.32826	0.982318	0.354253	2.88642
	17					1.43323	3.00269	0.0150225	2.77048	2.19697	1.78933	1.44697	1.18625	0.659631
7	1					1.38418	1.41004	1.49218	1.27416	2.46705	1.48126	0.889482	1.22506	1.81975					7																		7
	2					1.2414	1.47226	0.605685	0.656424	0.308887	0.412415	0.604827	0.895923	1.53905	1.76462
	3			1.35678	1.45473	1.44372	1.08145	2.2577	0.476488	0.402323	1.04037	0.409342	0.80394	1.02323	1.48592	1.86022
	4			1.48194	1.60247	1.55408	1.17017	1.00508	2.92929	2.19258	1.96534	3.0478	0.700208	0.786217	1.24348	1.64266	2.03322
	5		2.36566	1.85885	1.73003	1.82546	1.02914	0.459072	2.81901	2.63385	2.25871		0.80097	1.06651	1.14689	1.62693	1.66709	2.25291
	6	3.0844	2.59658	2.16428	1.75476	2.76326	1.26281	3.09841	2.28078	2.23076	1.9196	1.95707	0.914127	1.22237	1.32883	1.38751	1.81329	1.99353
	7	2.8627	2.62964	2.37076	1.82034	1.40377	0.375086	2.95195	1.50276	1.76423	1.39098	1.49125	1.61914	1.20192	1.3036	1.56953	1.74993	2.11729
	8	2.77968	2.55516	2.01392	1.5759	1.52742	0.121941	2.91871	0.406285	0.918431	1.2065	1.48324	1.62314	1.36549	1.45283	1.7858	1.9539	2.44502
	9	2.72855	2.4468	1.72316	1.59623	0.102683	3.13501	3.09096	0.00485934	0.347117	1.39692	1.02138	0.699281	1.12786	1.80497	2.14008	2.39253	2.76693
	10	0.0464096	2.64233	1.75753	1.69016	1.83876	3.00492	3.09642	3.09394	2.89123	0.607206	0.66039	0.410879	0.305374	2.24049	2.48743	2.71023	2.86336
	11	3.14012	2.61409	1.86379	1.51615	1.2215	0.793872	0.238993	3.1403	2.82273	2.46692	0.0325526	0.167387	3.13581	2.88121	2.96169	0.0322751	0.0121608
	12	2.98071	2.10607	1.71999	1.42718	1.33413	1.01752	0.581037	0.760772	1.87674	2.04714	2.50154	2.88211	2.60512	0.0024631	0.282822	0.410605	0.251669
	13	2.4818	1.92535	1.70647	1.51589	1.53043	2.13064	1.64905	0.393155	1.91157	2.00683	2.405	2.57249	2.39137	2.40201	0.710281	0.778334	0.500574
	14		2.58698	1.49498	1.11276	1.70487	2.50613	2.97965	2.76462	2.15669	2.21323	2.17392	2.429	2.39732	2.40945	0.979519
	15			3.1291	0.332788	0.343122	3.0497	3.09096	2.85606	2.42184	2.09799	2.04882	2.6901	2.63494	2.75006	1.9392
	16				0.547374	0.252076	0.0721294	0.0485817	2.86173	2.53048	2.05703	1.52115	0.866023	3.05178	2.78611
	17					0.119229	0.238808	0.153913	2.87099	2.40324	2.08616	1.75388	1.23449	0.23401
8	1					1.33808	2.04096	2.59379	2.15228	1.74915	1.68982	0.346358	2.12125	2.16677					8																		8
	2					1.12817	2.24801	2.51163	1.83519	2.19864	1.32623	0.251433	0.172717	0.541062	1.88416
	3			1.26335	1.41676	1.29929	1.61178	2.51047	3.13288	1.91891	1.43423	0.163034	0.11185	1.11069	1.73069	1.98153
	4			1.25918	1.36272	1.31702	0.870781	2.35013	2.5203	2.13518	1.2646	0.471419	0.468193	1.22173	1.39928	1.74735	2.1727
	5		2.99139	1.60259	1.51986	1.48469	0.727366	3.05911	2.427	2.56872	1.7889		0.955997	1.10891	0.99775	1.29967	1.80013	2.17162
	6	2.79741	2.48698	2.18187	1.8144	1.39397	0.199735	2.86349	2.76002	1.97001	1.75706	1.62843	1.40651	1.01678	1.05598	1.319	1.74927	2.329
	7	2.72238	2.48723	2.06056	1.88989	1.58233	2.73153	2.97995	0.0783256	0.439226	1.24659	1.31309	1.61	1.26741	1.24651	1.45872	1.95098	2.22205
	8	2.69687	2.29209	1.97074	1.71083	1.74447	2.54043	3.05226	0.0107665	0.140059	0.780181	1.36176	1.71215	1.33727	1.32246	1.87529	2.29373	2.58899
	9	2.74552	2.1522	1.72232	1.52681	1.86508	2.75247	2.9783	0.0319331	0.166927	0.697625	0.713949	0.87639	1.06423	1.37341	2.50133	2.63304	2.71191
	10	2.97685	2.66936	1.55015	1.72012	2.22969	2.96681	2.98649	3.04489	2.86494	1.05019	0.658411	0.555356	0.763286	1.46422	2.74133	2.82813	2.92283
	11	2.68697	2.10492	1.42602	1.43939	1.54256	3.12055	0.109093	0.0102843	2.54537	2.77327	0.268526	0.403203	0.42207	0.201012	3.11526	0.0637794	0.0473066
	12	2.38631	1.90454	1.63625	1.66617	1.48936	1.24978	0.435638	2.60752	2.05321	2.15154	2.78088	2.82582	0.148364	0.471978	0.288611	0.359895	0.172889
	13	2.30283	1.97584	1.71611	1.49573	1.48228	1.77759	3.03034	2.92791	2.36021	2.16143	2.4909	2.56194	2.26856	1.41897	0.804242	0.805216	0.650468
	14		2.29786	2.17351	1.44943	1.50269	2.46431	2.94298	2.91544	2.52849	2.30928	2.4011	2.64144	2.53766	1.75049	1.09531
	15			1.54213	0.921853	0.713901	0.0262912	0.00843736	2.81513	2.58845	2.24848	1.42609	0.612585	2.88064	2.5887	1.53302
	16				2.80481	2.36096	2.97309	3.1133	2.76228	2.45422	1.74501	1.33848	0.901245	0.338856	2.84893
	17					1.86432	1.81041	0.211247	2.66828	2.26186	1.86999	1.47608	1.05615	0.449499
9	1					1.38511	1.37355	1.09269	0.990921	1.18873	1.50406	0.398649	1.3346	1.59921					9																		9
	2					1.34954	1.43498	1.01567	0.922013	0.617923	0.825554	0.411784	0.241335	0.938817	1.68521
	3			1.41801	1.5007	1.64023	1.36409	0.890848	0.583759	0.307954	0.466112	0.461523	0.559632	1.20776	1.79507	1.81379
	4			1.4232	1.46064	1.44017	1.17077	1.86263	3.05567	2.47078	1.69477	0.149641	0.719392	0.929038	1.4967	1.89246	2.27427
	5		3.05771	1.66064	1.71941	1.48853	0.521059	2.60007	2.37645	2.0969	1.91031		0.451943	0.951964	1.46579	1.65709	1.97841	2.30605
	6	2.95271	2.59893	1.95265	1.63837	1.70547	0.783382	2.31126	2.19162	1.94283	1.90017	1.3353	0.856183	1.11062	1.37164	1.69451	1.92649	2.33667
	7	2.84191	2.55636	2.19707	1.77143	1.72657	2.80045	2.48742	2.8848	1.4502	1.64536	1.27734	1.5211	1.06124	1.27994	1.67122	1.91486	2.26298
	8	2.59027	2.3988	1.97531	1.60082	1.62013	1.74249	2.99945	3.11799	0.288797	1.27967	1.11079	1.29213	1.07631	1.33265	1.85579	2.18592	2.38074
	9	2.58492	2.14063	1.83186	1.56419	1.87765	2.94768	0.0150816	3.11699	3.08454	0.958079	0.801464	0.737257	0.954171	1.60732	2.19902	2.46602	2.60684
	10	0.174025	1.69108	1.44859	1.57554	1.34498	0.00690391	0.0443422	0.0711801	0.00235163	0.786	0.634381	0.662582	0.781061	2.08698	2.50828	2.8402	2.97313
	11	0.227755	1.45356	1.56907	1.48301	1.041	0.575868	0.513548	0.321804	0.129044	1.78134	0.383761	0.258431	0.322533	2.56541	2.88734	0.0936778	0.0562205
	12	2.87305	1.72909	1.54866	1.44475	1.38113	1.12125	0.776475	0.625453	1.18777	1.94796	2.52538	2.66182	2.47085	0.316377	0.191516	0.360644	0.320273
	13	2.60801	1.85748	1.77664	1.57886	1.5781	1.41099	0.468715	0.20757	1.69583	1.86785	2.39085	2.44692	2.14948	2.17896	0.960002	0.919477	0.234751
	14		2.19913	1.59923	1.35616	1.43817	2.9504	3.12162	3.07063	2.51708	2.09011	1.83665	2.64714	2.3172	1.82009	1.38189
	15			3.08739	0.899374	0.510034	3.08714	3.12411	2.94377	2.52213	1.90678	1.35217	0.826819	2.90341	2.36279	1.68787
	16				1.17467	0.024196	3.00313	3.06874	2.96535	2.53136	1.63809	1.40458	0.980809	0.416426	2.71059
	17					1.63213	1.6904	0.220033	2.98012	2.28606	1.84467	1.49221	1.14956	0.432572
10	1					1.43031	1.55817	1.45547	1.26404	0.767258	1.29662	0.521035	2.04884	1.95627					10																		10
	2					1.2865	1.73112	2.94473	1.81531	0.419938	0.751779	0.598795	0.447891	1.60091	1.97647
	3			1.28126	1.27851	1.32958	1.1237	0.929183	1.56261	2.72365	0.91422	0.324719	0.550931	1.07048	1.42202	2.26569
	4			1.14555	1.16425	1.25669	0.258022	2.10899	2.18638	2.23287	1.96792	0.59058	0.752014	0.960306	1.06151	2.30467	2.39219
	5		0.12411	1.80226	1.22827	0.395552	0.0629309	0.000269457	2.51615	2.32977	2.00921		0.80939	1.00777	1.00589	1.38441	1.89079	2.17205
	6	2.83749	2.7836	2.46038	1.53327	0.268326	0.416777	2.96173	2.53181	2.04902	1.78642	1.34107	0.697587	1.05564	1.1041	1.30962	1.55307	1.93028
	7	2.76845	2.61558	2.33248	1.50854	1.05701	0.53659	2.95456	3.05641	1.34507	0.683249	0.868892	1.16015	1.08044	1.18101	1.30744	1.65295	2.19878
	8	2.6869	2.58241	1.86578	1.43183	1.39787	3.02478	2.96046	3.02174	0.169001	0.509462	0.720593	0.909217	1.21789	1.33676	1.63587	1.83637	2.42437
	9	2.82318	2.57228	1.56071	1.47337	1.45761	0.0098595	2.96281	2.99366	3.02366	0.294137	0.635162	0.814782	0.767361	1.44937	2.04724	2.28439	2.5969
	10	3.11711	1.51334	1.37801	1.40001	1.23645	3.04917	2.85281	2.97529	2.91439	0.130645	0.378909	0.615278	0.759339	1.86176	2.59309	2.99741	3.11047
	11	0.380614	1.6284	1.53578	1.49242	1.14785	0.440555	0.145991	2.67925	2.74762	2.81004	3.03887	3.1368	0.267702	0.0896383	0.0398378	0.166927	0.175508
	12	0.344522	1.6527	1.72195	1.50502	1.43058	0.993691	0.200701	2.81669	2.33163	2.44134	2.48952	2.56951	2.75474	0.00862141	0.248171	0.34549	0.241534
	13	2.16019	1.72987	1.74388	1.60488	1.65411	1.71064	0.103996	2.99646	2.3607	2.22659	2.59215	2.53505	2.37888	3.02777	0.709252	0.81011	0.0361484
	14		2.19308	1.7151	1.51309	1.41462	0.455962	3.06356	2.94794	2.70242	2.36053	2.40252	2.67323	2.47554	2.1131	1.44638
	15			1.35094	1.27893	1.01032	0.45317	0.178963	2.98459	2.65236	2.19828	1.61535	0.586165	2.65192	2.56934	2.04516
	16				1.39506	0.786112	0.456621	0.171546	2.96059	2.49181	1.91969	1.48406	0.891072	0.118011	2.79044
	17					1.34261	0.5418	0.3727	3.02713	2.20078	1.80534	1.57221	1.23017	0.469821
