# Supplementary material for: Stationary Atrial Fibrillation Properties in the Goat Do Not Entail Stable or Recurrent Conduction Patterns
Source: Front Physiol. 2018 Jul 27;9:947. doi: 10.3389/fphys.2018.00947 (PMC6072874; doi:10.3389/fphys.2018.00947)
Supplement: Supplementary file 1 [file Data_Sheet_1.ZIP › Goat_5_Property maps.xlsx]

## Sheet: AFCL
AFCL
Signals of insufficient quality were excluded from the property maps. Signals could be rejected based on noise low amplitude, large artefact or ventricluar farfields that could not be substracted.
		1	2	3	4	5	6	7	8	9	10	11	12	13	14	15	16	17
1	1					0.138595	0.138595	0.139557	0.137632	0.135707	0.134745	0.134745	0.135707	0.13667					1																		1
	2					0.137632	0.137632	0.137151	0.135707	0.134745	0.13282	0.133782	0.134745	0.133782	0.13282
	3			0.13282	0.13282	0.13667	0.135707	0.134745	0.134745	0.13282	0.131858	0.131858	0.131858	0.131376	0.130895	0.131858
	4		0.129933	0.129933	0.133782	0.135707	0.134745	0.13282	0.13282	0.130414	0.129933	0.12897	0.129933	0.129933	0.129933	0.130895	0.130895
	5	0.128008	0.128008	0.130895	0.135707	0.135707	0.134264	0.131858	0.131858	0.129933	0.12897	0.128008	0.127045	0.128008	0.12897	0.129933	0.131858	0.133782
	6	0.127045	0.129933	0.133782	0.134745	0.134745	0.133782	0.131858	0.13282	0.12897	0.128008	0.127045	0.127045	0.128008	0.128008	0.12897	0.130895	0.135707
	7	0.12897	0.130895	0.135707	0.134745	0.133782	0.13282	0.130895	0.12897	0.12897	0.127045	0.127045	0.128008	0.127045	0.127045	0.128008	0.130895	0.135707
	8	0.133782	0.137632	0.13667	0.133782	0.129933	0.129933	0.130895	0.127045	0.128008	0.127045	0.127045	0.127045	0.127045	0.127045	0.12897	0.130895	0.133782
	9	0.134745	0.13667	0.135226	0.132339	0.12897	0.128008	0.128008	0.128008	0.127045	0.12512	0.126083	0.127045	0.128008	0.12897	0.129933	0.13282	0.133782
	10	0.13282	0.133782	0.135226	0.13282	0.130895	0.12897	0.128008	0.128008	0.126083	0.12512	0.12512	0.126083	0.127045	0.127045	0.12897	0.130895	0.13282
	11	0.13282	0.133782	0.133782	0.13282	0.130895	0.129933	0.127045	0.127045	0.12512	0.124158	0.124158	0.12512	0.126083	0.127045	0.129933	0.130895	0.131858
	12	0.129933	0.13282	0.135226	0.13282	0.131858	0.129933	0.127045	0.12512	0.124158	0.123677	0.124158	0.12512	0.128008	0.127045	0.129933	0.130895	0.131858
	13	0.127045	0.130895	0.133782	0.131858	0.129933	0.127045	0.12512	0.124158	0.124158	0.124158	0.124158	0.124158	0.12512	0.127526	0.130895	0.130895	0.13282
	14		0.12512	0.129933	0.128008	0.126083	0.124158	0.124158	0.124158	0.124158	0.123195	0.124158	0.124158	0.124158	0.128008	0.132339	0.133782
	15			0.12512	0.12512	0.124158	0.123195	0.124158	0.123195	0.123195	0.123677	0.124158	0.12512	0.126083
	16				0.123195	0.123195	0.123195	0.124158	0.124158	0.124158	0.124158	0.12512
	17					0.123195	0.125602	0.127045	0.127045	0.128008
2	1					0.139557	0.137632	0.138595	0.138595	0.13667	0.135707	0.135707	0.134745	0.134745					2																		2
	2					0.138595	0.137632	0.137632	0.137632	0.135707	0.134745	0.133782	0.13282	0.133782	0.134264
	3			0.13282	0.133782	0.137632	0.13667	0.135707	0.135707	0.133782	0.13282	0.13282	0.13282	0.131858	0.131858	0.13282
	4		0.129933	0.12897	0.134745	0.13667	0.135707	0.134745	0.13282	0.129933	0.12897	0.12897	0.12897	0.129451	0.129933	0.130895	0.13282
	5	0.128008	0.128008	0.130895	0.13667	0.13667	0.135707	0.134745	0.131858	0.130414	0.128008	0.127045	0.127045	0.127045	0.12897	0.12897	0.129933	0.134745
	6	0.127045	0.12897	0.133782	0.135707	0.13667	0.135707	0.13282	0.133782	0.12897	0.127045	0.126083	0.126083	0.126083	0.128008	0.128008	0.129933	0.135707
	7	0.12897	0.131858	0.13667	0.135707	0.135226	0.13282	0.131858	0.12897	0.12897	0.126083	0.12512	0.12512	0.126083	0.128008	0.128008	0.12897	0.136189
	8	0.133782	0.139557	0.137632	0.134745	0.12897	0.130895	0.131858	0.128008	0.127045	0.12512	0.12512	0.12512	0.127045	0.127045	0.128008	0.12897	0.134745
	9	0.13667	0.138595	0.13667	0.13282	0.127045	0.126083	0.128008	0.126564	0.126083	0.124158	0.124158	0.12512	0.127045	0.129933	0.12897	0.130895	0.133782
	10	0.134745	0.138595	0.13667	0.13282	0.129451	0.128008	0.127045	0.126083	0.126083	0.124158	0.124158	0.124158	0.12512	0.127045	0.128008	0.129933	0.13282
	11	0.13282	0.134745	0.13667	0.13282	0.130895	0.128008	0.12512	0.12512	0.124158	0.122233	0.123195	0.123195	0.12512	0.126083	0.128008	0.129451	0.130895
	12	0.129933	0.133782	0.134745	0.131858	0.129933	0.12897	0.125602	0.123195	0.122233	0.122233	0.122233	0.123195	0.12512	0.126083	0.128008	0.130895	0.131858
	13	0.126083	0.130895	0.131858	0.129933	0.12897	0.126083	0.12512	0.123195	0.12127	0.12127	0.122233	0.122233	0.122233	0.126083	0.13282	0.133301	0.131858
	14		0.12512	0.127045	0.126083	0.126083	0.124158	0.124158	0.122233	0.122233	0.122233	0.12127	0.121752	0.122233	0.126083	0.13282	0.133782
	15			0.124158	0.124158	0.123195	0.122233	0.123195	0.122233	0.122233	0.122233	0.122233	0.122233	0.12512
	16				0.123195	0.122233	0.123195	0.123195	0.123195	0.123195	0.124158	0.12512
	17					0.124158	0.12512	0.126083	0.127045	0.12897
3	1					0.13667	0.135707	0.13667	0.135707	0.134264	0.133301	0.131858	0.13282	0.13282					3																		3
	2					0.13667	0.13667	0.135707	0.133782	0.13282	0.13282	0.131858	0.130895	0.13282	0.13282
	3			0.13282	0.131858	0.13667	0.135707	0.133782	0.13282	0.130895	0.130895	0.129933	0.129933	0.130895	0.130895	0.132339
	4		0.127045	0.128008	0.133782	0.135707	0.133782	0.133782	0.130895	0.12897	0.128008	0.127045	0.126083	0.128008	0.12897	0.129933	0.131858
	5	0.127045	0.126083	0.12897	0.134745	0.134745	0.134745	0.13282	0.130895	0.127045	0.127045	0.12512	0.12512	0.126083	0.127045	0.12897	0.131858	0.133782
	6	0.12512	0.126083	0.131858	0.133782	0.134745	0.133782	0.13282	0.13282	0.127526	0.126083	0.124158	0.12512	0.12512	0.126083	0.127045	0.130895	0.135226
	7	0.127045	0.12897	0.134745	0.134745	0.134745	0.133782	0.13282	0.127045	0.128008	0.12512	0.124158	0.124158	0.12512	0.12512	0.126083	0.129451	0.134745
	8	0.13282	0.137632	0.135707	0.133782	0.130895	0.131858	0.13282	0.127045	0.12897	0.124639	0.124158	0.12512	0.12512	0.126083	0.127045	0.129933	0.134745
	9	0.13667	0.137632	0.135707	0.133782	0.12897	0.12897	0.12897	0.126083	0.127045	0.124158	0.124158	0.12512	0.12512	0.127045	0.127045	0.130895	0.133782
	10	0.134745	0.135707	0.135707	0.13282	0.12897	0.128008	0.127045	0.126083	0.12512	0.123195	0.124158	0.124158	0.124158	0.126083	0.127045	0.12897	0.131858
	11	0.13282	0.133782	0.134745	0.13282	0.129933	0.12897	0.126083	0.12512	0.124158	0.123195	0.124158	0.124158	0.12512	0.126083	0.127045	0.128008	0.129933
	12	0.128008	0.131858	0.13282	0.13282	0.129933	0.126564	0.124158	0.123677	0.123195	0.123195	0.123195	0.124158	0.12512	0.126083	0.128008	0.12897	0.129933
	13	0.126083	0.130414	0.131858	0.129451	0.128008	0.126083	0.124158	0.123195	0.123195	0.123195	0.123195	0.123195	0.124158	0.126083	0.12897	0.12897	0.129933
	14		0.12512	0.127045	0.126083	0.126083	0.12512	0.124158	0.123195	0.123195	0.122714	0.123195	0.123195	0.124158	0.126083	0.129933	0.130895
	15			0.124158	0.12512	0.124158	0.123195	0.124158	0.124158	0.123195	0.123195	0.124158	0.123195	0.12512
	16				0.123195	0.123677	0.123195	0.124158	0.12512	0.124158	0.12512	0.12512
	17					0.124158	0.126083	0.126083	0.128008	0.12897
4	1					0.135707	0.135707	0.135707	0.135707	0.134745	0.134745	0.133782	0.133782	0.134745					4																		4
	2					0.135707	0.13667	0.135707	0.134745	0.133782	0.133782	0.133782	0.133782	0.133782	0.133782
	3			0.131858	0.131858	0.135707	0.134745	0.134745	0.133782	0.13282	0.13282	0.130895	0.130895	0.129933	0.130895	0.130895
	4		0.127045	0.12897	0.134745	0.135707	0.134745	0.133782	0.131858	0.130895	0.129933	0.12897	0.128008	0.128008	0.12897	0.129933	0.131858
	5	0.126083	0.126083	0.129933	0.134745	0.135707	0.133782	0.13282	0.130895	0.129933	0.128489	0.126083	0.127045	0.127045	0.127045	0.128008	0.130895	0.13282
	6	0.125602	0.126083	0.13282	0.134745	0.134745	0.133782	0.131858	0.131858	0.129933	0.127045	0.126083	0.126083	0.126083	0.127045	0.128008	0.12897	0.131858
	7	0.127045	0.129933	0.133782	0.134745	0.133782	0.13282	0.131858	0.12897	0.128008	0.126083	0.12512	0.126083	0.12512	0.126564	0.127045	0.12897	0.129933
	8	0.135707	0.13667	0.135707	0.133782	0.129933	0.130895	0.130895	0.127045	0.127526	0.126083	0.12512	0.126083	0.126083	0.127045	0.128008	0.12897	0.13282
	9	0.135707	0.137632	0.135707	0.130895	0.128008	0.128008	0.128008	0.126083	0.12512	0.12512	0.124158	0.12512	0.127045	0.128008	0.128008	0.12897	0.129933
	10	0.134745	0.137632	0.135707	0.13282	0.128008	0.127045	0.126083	0.12512	0.124158	0.123195	0.122233	0.124639	0.12512	0.127045	0.127045	0.127045	0.130895
	11	0.13282	0.135707	0.135707	0.133782	0.12897	0.127045	0.12512	0.124158	0.122233	0.123195	0.122233	0.123195	0.12512	0.126083	0.127045	0.128008	0.130895
	12	0.128008	0.133301	0.131858	0.13282	0.128008	0.126083	0.123677	0.123195	0.122233	0.12127	0.122233	0.123195	0.12512	0.126083	0.128008	0.12897	0.129933
	13	0.127045	0.129451	0.130895	0.12897	0.127045	0.12512	0.123195	0.122233	0.122233	0.12127	0.122233	0.122233	0.123195	0.126083	0.12897	0.130414	0.131858
	14		0.12512	0.127045	0.126083	0.12512	0.123195	0.124158	0.123195	0.122233	0.12127	0.122233	0.122233	0.123195	0.126083	0.131858	0.131858
	15			0.12512	0.12512	0.124158	0.123195	0.122714	0.123195	0.122233	0.123195	0.122233	0.123195	0.124158
	16				0.124158	0.124158	0.123195	0.124158	0.123677	0.124158	0.12512	0.124639
	17					0.12512	0.126083	0.126083	0.127045	0.128008
5	1					0.134745	0.135707	0.134745	0.133782	0.133782	0.131858	0.130895	0.131858	0.129933					5																		5
	2					0.134745	0.134264	0.134264	0.13282	0.131858	0.131376	0.130895	0.130895	0.129933	0.12897
	3			0.130895	0.13282	0.134745	0.133782	0.13282	0.13282	0.130895	0.129933	0.129933	0.129933	0.128008	0.12897	0.12897
	4		0.127045	0.12897	0.13282	0.134745	0.13282	0.130895	0.129933	0.12897	0.128008	0.126083	0.126083	0.126083	0.127045	0.128008	0.12897
	5	0.126083	0.127045	0.129451	0.133782	0.134745	0.13282	0.130895	0.12897	0.128008	0.127045	0.12512	0.12512	0.12512	0.126083	0.128008	0.12897	0.12897
	6	0.124639	0.126083	0.13282	0.133782	0.133782	0.131858	0.130895	0.130895	0.128008	0.126083	0.124158	0.124158	0.12512	0.126083	0.127045	0.130895	0.129933
	7	0.128008	0.130895	0.13282	0.133782	0.133782	0.129933	0.12897	0.128008	0.128008	0.126083	0.124158	0.12512	0.12512	0.12512	0.12512	0.129933	0.130895
	8	0.133782	0.138595	0.136189	0.13282	0.128008	0.12897	0.128008	0.12512	0.126083	0.124158	0.123195	0.12512	0.12512	0.12512	0.126083	0.129451	0.13282
	9	0.134745	0.135707	0.133782	0.129933	0.126083	0.12512	0.126083	0.126083	0.126083	0.121752	0.123195	0.124158	0.126083	0.127045	0.128008	0.129933	0.133782
	10	0.13282	0.134745	0.13282	0.129451	0.126564	0.126083	0.126083	0.12512	0.124639	0.12127	0.122714	0.123195	0.124158	0.127045	0.127045	0.12897	0.13282
	11	0.133301	0.137632	0.13282	0.130895	0.128008	0.127045	0.124158	0.124158	0.12127	0.120308	0.122233	0.122233	0.123195	0.126083	0.127526	0.129933	0.130895
	12	0.128008	0.134745	0.134745	0.13282	0.12897	0.126083	0.12512	0.123195	0.120308	0.12127	0.12127	0.122233	0.124158	0.126083	0.127045	0.129933	0.129933
	13	0.123195	0.129933	0.13282	0.131858	0.128008	0.126083	0.123195	0.122233	0.12127	0.12127	0.12127	0.12127	0.122233	0.124158	0.129933	0.129933	0.130895
	14		0.123195	0.12512	0.127045	0.12512	0.124158	0.123195	0.122233	0.12127	0.12127	0.12127	0.121752	0.122233	0.12512	0.130895	0.129933
	15			0.124158	0.124158	0.122233	0.122233	0.122233	0.122233	0.122233	0.12127	0.122233	0.122233	0.12512
	16				0.123195	0.123195	0.122233	0.122233	0.123195	0.123195	0.123195	0.123195
	17					0.123195	0.12512	0.126083	0.127045	0.128008
6	1					0.134745	0.135226	0.135707	0.133301	0.131858	0.131858	0.131858	0.131858	0.129933					6																		6
	2					0.134745	0.135707	0.135707	0.133782	0.131858	0.130895	0.130895	0.130895	0.129933	0.12897
	3			0.129933	0.130895	0.133782	0.134745	0.134745	0.133782	0.129933	0.12897	0.12897	0.129933	0.128008	0.128008	0.128008
	4		0.128008	0.12897	0.133782	0.134264	0.13282	0.131858	0.129933	0.127045	0.126083	0.12512	0.126083	0.125602	0.126083	0.126083	0.128008
	5	0.127045	0.127045	0.130895	0.134745	0.134745	0.13282	0.130895	0.12897	0.126083	0.12512	0.124158	0.124158	0.12512	0.12512	0.126564	0.127045	0.129451
	6	0.126083	0.128008	0.13282	0.134745	0.134264	0.13282	0.130895	0.129933	0.126083	0.124158	0.124158	0.124158	0.12512	0.126083	0.126083	0.128008	0.129933
	7	0.128008	0.129933	0.133782	0.134745	0.13282	0.131376	0.129933	0.127045	0.126083	0.124158	0.124158	0.124158	0.124639	0.12512	0.126083	0.127045	0.129933
	8	0.133782	0.138595	0.135707	0.13282	0.129933	0.129933	0.12897	0.126083	0.126083	0.123195	0.124158	0.124158	0.12512	0.12512	0.126083	0.128008	0.12897
	9	0.133782	0.13667	0.133782	0.130895	0.127045	0.126083	0.126083	0.126083	0.12512	0.123195	0.123195	0.124158	0.126083	0.126083	0.127045	0.127045	0.12897
	10	0.13282	0.13667	0.134745	0.131858	0.128008	0.126083	0.127045	0.127045	0.124158	0.123195	0.123195	0.123195	0.124158	0.12512	0.12512	0.126083	0.128008
	11	0.13282	0.137632	0.134745	0.131858	0.129933	0.128008	0.12512	0.124158	0.123195	0.122233	0.122233	0.123195	0.124158	0.124158	0.12512	0.126564	0.127045
	12	0.126083	0.133301	0.133301	0.131858	0.12897	0.125602	0.124158	0.123195	0.122233	0.122233	0.122233	0.123195	0.12512	0.124158	0.126083	0.126083	0.127045
	13	0.12512	0.127045	0.12897	0.130895	0.128008	0.124639	0.123195	0.123195	0.122233	0.122233	0.122233	0.122233	0.123195	0.12512	0.127045	0.127045	0.128008
	14		0.123195	0.124158	0.127045	0.124158	0.124158	0.123195	0.123195	0.123195	0.123195	0.123195	0.122233	0.122233	0.12512	0.12897	0.129933
	15			0.122233	0.123195	0.123195	0.123195	0.123195	0.124158	0.123195	0.124158	0.123195	0.123195	0.124158
	16				0.122233	0.123195	0.123195	0.123195	0.124158	0.124158	0.124158	0.12512
	17					0.124158	0.126083	0.126083	0.127045	0.128008
7	1					0.135707	0.135707	0.135226	0.134745	0.13282	0.133782	0.13282	0.13282	0.133782					7																		7
	2					0.134745	0.134745	0.134745	0.13282	0.131858	0.13282	0.13282	0.13282	0.131858	0.130895
	3			0.130895	0.129933	0.133782	0.133782	0.133782	0.133782	0.129933	0.130895	0.130895	0.130895	0.130414	0.130895	0.129933
	4		0.126083	0.12897	0.134745	0.134745	0.133782	0.131858	0.130895	0.12897	0.128489	0.127045	0.127045	0.12897	0.129933	0.129933	0.130414
	5	0.126083	0.128008	0.130895	0.134745	0.135707	0.133782	0.131858	0.12897	0.128489	0.127045	0.126083	0.12512	0.12512	0.128008	0.12897	0.129933	0.130895
	6	0.127045	0.128008	0.13282	0.133782	0.134745	0.133782	0.131858	0.130895	0.12897	0.127045	0.12512	0.124158	0.12512	0.127045	0.12897	0.130895	0.130895
	7	0.128008	0.130895	0.133782	0.133782	0.134745	0.13282	0.130895	0.127045	0.128008	0.126564	0.124158	0.12512	0.12512	0.126083	0.127526	0.13282	0.13282
	8	0.13282	0.13667	0.135707	0.133782	0.129933	0.131858	0.130895	0.127045	0.127045	0.12512	0.124158	0.12512	0.126083	0.126083	0.128008	0.130895	0.13282
	9	0.134745	0.138595	0.13667	0.131858	0.127045	0.127045	0.127045	0.126083	0.126083	0.123195	0.123195	0.124158	0.126083	0.128008	0.12897	0.130895	0.134745
	10	0.13282	0.13667	0.13667	0.13282	0.128008	0.126083	0.12512	0.12512	0.124158	0.122233	0.122233	0.124158	0.12512	0.127045	0.12897	0.129451	0.131858
	11	0.13282	0.13667	0.134745	0.133782	0.129933	0.128008	0.123195	0.124158	0.123195	0.12127	0.12127	0.123195	0.123195	0.126083	0.128008	0.12897	0.130895
	12	0.126083	0.13282	0.133782	0.133782	0.131858	0.12512	0.123195	0.123195	0.12127	0.120308	0.120308	0.121752	0.123195	0.124158	0.127045	0.12897	0.129451
	13	0.124158	0.128008	0.131858	0.130895	0.128008	0.124158	0.122233	0.122233	0.12127	0.120308	0.120308	0.120308	0.12127	0.124158	0.12897	0.129933	0.130895
	14		0.123195	0.126083	0.127045	0.12512	0.122233	0.122233	0.12127	0.120308	0.120308	0.120308	0.120789	0.12127	0.123195	0.133301	0.133782
	15			0.123195	0.122233	0.122233	0.12127	0.12127	0.12127	0.12127	0.12127	0.12127	0.12127	0.123195
	16				0.12127	0.121752	0.122233	0.122233	0.122233	0.122233	0.124158	0.124158
	17					0.123195	0.126083	0.12512	0.128008	0.12897
8	1					0.13667	0.135707	0.135707	0.134745	0.133301	0.13282	0.13282	0.13282	0.13282					8																		8
	2					0.135707	0.135707	0.134745	0.134745	0.13282	0.13282	0.131858	0.130895	0.131858	0.130895
	3			0.129933	0.130895	0.134745	0.133782	0.134745	0.133782	0.131858	0.131858	0.130895	0.129933	0.129933	0.12897	0.129933
	4		0.12897	0.129933	0.13282	0.134745	0.13282	0.13282	0.131858	0.130895	0.129933	0.129933	0.12897	0.12897	0.12897	0.12897	0.129933
	5	0.126083	0.127045	0.129933	0.133782	0.133782	0.13282	0.131858	0.131858	0.130895	0.129933	0.128489	0.127045	0.127045	0.128008	0.128008	0.12897	0.130895
	6	0.127045	0.128008	0.13282	0.133782	0.133782	0.13282	0.131858	0.131858	0.130895	0.128008	0.128008	0.127045	0.127045	0.127045	0.12897	0.129933	0.129933
	7	0.12897	0.131858	0.134745	0.134745	0.134745	0.131858	0.130895	0.128008	0.129933	0.127045	0.127045	0.127045	0.126083	0.128008	0.12897	0.12897	0.130895
	8	0.133782	0.139557	0.135707	0.134745	0.129933	0.130895	0.130895	0.128008	0.128008	0.127045	0.126564	0.126083	0.127045	0.128008	0.12897	0.129933	0.130895
	9	0.13667	0.13667	0.134745	0.131858	0.129451	0.128008	0.12897	0.127045	0.127045	0.127045	0.126083	0.127045	0.128008	0.129933	0.129933	0.129933	0.130895
	10	0.133782	0.135707	0.13282	0.131858	0.129933	0.12897	0.127526	0.127045	0.126083	0.126083	0.126083	0.127045	0.127045	0.128008	0.128008	0.12897	0.130414
	11	0.131858	0.133782	0.13282	0.131858	0.12897	0.128008	0.126083	0.126083	0.12512	0.12512	0.12512	0.126083	0.126083	0.128008	0.128008	0.128008	0.129933
	12	0.12897	0.134745	0.131858	0.130895	0.12897	0.126083	0.126083	0.12512	0.12512	0.12512	0.12512	0.126083	0.127045	0.127045	0.128008	0.12897	0.130895
	13	0.127045	0.12897	0.13282	0.130895	0.128008	0.127045	0.126083	0.126083	0.12512	0.124158	0.12512	0.12512	0.126083	0.127045	0.129933	0.129933	0.130414
	14		0.12512	0.127045	0.128008	0.126083	0.126083	0.126083	0.12512	0.12512	0.124158	0.12512	0.12512	0.126083	0.127045	0.130895	0.131858
	15			0.124158	0.126083	0.126083	0.12512	0.126083	0.12512	0.12512	0.12512	0.126083	0.126083	0.128008
	16				0.124158	0.12512	0.12512	0.126083	0.127045	0.127045	0.126564	0.128008
	17					0.12512	0.128008	0.12897	0.12897	0.12897
9	1					0.13282	0.13282	0.13282	0.13282	0.131858	0.130895	0.129933	0.129933	0.129933					9																		9
	2					0.133782	0.133301	0.13282	0.131858	0.130895	0.129933	0.12897	0.12897	0.12897	0.129933
	3			0.128008	0.129933	0.13282	0.133782	0.131858	0.131858	0.130414	0.12897	0.129933	0.12897	0.12897	0.12897	0.128008
	4		0.127045	0.127045	0.13282	0.133782	0.13282	0.131858	0.129933	0.12897	0.128008	0.128008	0.127045	0.127045	0.128008	0.12897	0.12897
	5	0.12512	0.126083	0.12897	0.13282	0.133782	0.13282	0.130895	0.129933	0.128008	0.128008	0.126083	0.12512	0.127045	0.127045	0.128008	0.128008	0.12897
	6	0.12512	0.127045	0.130895	0.131858	0.133782	0.13282	0.131858	0.129933	0.127045	0.127045	0.126083	0.12512	0.126083	0.127045	0.12897	0.12897	0.129933
	7	0.128008	0.129933	0.133782	0.133782	0.13282	0.131858	0.129933	0.128008	0.128008	0.127045	0.12512	0.125602	0.126083	0.127045	0.128008	0.129933	0.131858
	8	0.13282	0.137632	0.134745	0.13282	0.12897	0.130895	0.129933	0.128008	0.127045	0.126083	0.12512	0.126083	0.127045	0.127045	0.128008	0.12897	0.13282
	9	0.133782	0.135707	0.133782	0.130895	0.128008	0.127045	0.12897	0.127045	0.124639	0.12512	0.124158	0.126083	0.127045	0.128008	0.12897	0.12897	0.131858
	10	0.133782	0.133782	0.13282	0.129933	0.12897	0.127045	0.126083	0.126083	0.124158	0.123195	0.124158	0.124158	0.12512	0.126083	0.127045	0.12897	0.131858
	11	0.129933	0.133301	0.13282	0.130895	0.12897	0.127045	0.12512	0.12512	0.124158	0.122233	0.123195	0.123195	0.123195	0.12512	0.127045	0.127045	0.129933
	12	0.126083	0.13282	0.130895	0.129933	0.128008	0.127045	0.12512	0.123677	0.122233	0.12127	0.12127	0.123195	0.12512	0.12512	0.127045	0.128008	0.130414
	13	0.124158	0.130895	0.129933	0.12897	0.127045	0.126083	0.123195	0.122233	0.12127	0.12127	0.12127	0.12127	0.122233	0.12512	0.12897	0.12897	0.130895
	14		0.123195	0.126083	0.127045	0.12512	0.123195	0.123195	0.12127	0.122233	0.12127	0.12127	0.12127	0.122233	0.126083	0.129933	0.13282
	15			0.123195	0.124158	0.123195	0.123195	0.123195	0.123195	0.122233	0.123195	0.122233	0.122233	0.12512
	16				0.123195	0.123195	0.123195	0.123195	0.124158	0.123195	0.124158	0.124158
	17					0.123195	0.126083	0.127045	0.128008	0.127045
10	1					0.133782	0.133782	0.133782	0.13282	0.131858	0.130414	0.129933	0.12897	0.129933					10																		10
	2					0.133782	0.134745	0.133782	0.131858	0.131858	0.130895	0.129933	0.129933	0.129933	0.129933
	3			0.12897	0.130414	0.133782	0.133782	0.13282	0.132339	0.130895	0.129933	0.129933	0.129933	0.128008	0.127045	0.12897
	4		0.127045	0.128008	0.133782	0.134745	0.13282	0.131858	0.130895	0.12897	0.12897	0.127045	0.126083	0.127045	0.127045	0.128008	0.12897
	5	0.127045	0.127045	0.12897	0.133782	0.133782	0.13282	0.129933	0.129933	0.128008	0.128008	0.126083	0.126083	0.12512	0.127045	0.128008	0.12897	0.12897
	6	0.126083	0.128008	0.131858	0.13282	0.133782	0.131858	0.130895	0.129933	0.128008	0.126083	0.12512	0.12512	0.124158	0.12512	0.127045	0.129933	0.129451
	7	0.127045	0.129933	0.133782	0.133782	0.13282	0.131858	0.130895	0.127045	0.12897	0.126083	0.124158	0.12512	0.124158	0.12512	0.126083	0.12897	0.13282
	8	0.131858	0.137632	0.134745	0.13282	0.12897	0.130895	0.129933	0.126083	0.128008	0.126083	0.124158	0.124158	0.124158	0.12512	0.127045	0.128008	0.133782
	9	0.133782	0.136189	0.133782	0.130895	0.128008	0.127045	0.127526	0.126083	0.12512	0.124158	0.123195	0.124158	0.12512	0.126083	0.127045	0.129933	0.13282
	10	0.131858	0.134745	0.133782	0.130895	0.128008	0.128008	0.126083	0.12512	0.123195	0.122233	0.123195	0.123195	0.124158	0.12512	0.12512	0.127526	0.129933
	11	0.130895	0.13282	0.135707	0.13282	0.129933	0.128008	0.124158	0.122233	0.123195	0.12127	0.123195	0.123195	0.124158	0.12512	0.127045	0.127526	0.129933
	12	0.127045	0.130895	0.131858	0.131858	0.129451	0.126564	0.124158	0.124158	0.122233	0.120308	0.12127	0.123195	0.12512	0.126083	0.128008	0.12897	0.129933
	13	0.124639	0.12897	0.131858	0.132339	0.12897	0.126083	0.124158	0.122233	0.12127	0.12127	0.12127	0.12127	0.123195	0.126564	0.12897	0.129933	0.129933
	14		0.123195	0.127045	0.127045	0.12512	0.124158	0.124158	0.123195	0.122233	0.12127	0.12127	0.12127	0.122233	0.127045	0.13282	0.13282
	15			0.123195	0.124158	0.123195	0.124158	0.123195	0.124158	0.123195	0.122233	0.122233	0.123195	0.126083
	16				0.122233	0.123195	0.122233	0.123195	0.124158	0.123195	0.12512	0.12512
	17					0.123195	0.12512	0.126083	0.127045	0.127045

## Sheet: DISS
MaxDissociation
Signals of insufficient quality were excluded from the property maps. Signals could be rejected based on noise low amplitude, large artefact or ventricluar farfields that could not be substracted.
		1	2	3	4	5	6	7	8	9	10	11	12	13	14	15	16	17
1	1					13.0276	17.8032	21.2729	19.9704	13.8629	10.0833	10.296	10.1458	10.5158					1																		1
	2					24.4419	24.7427	25.8871	23.6343	18.9286	14.0224	14.7634	14.5124	13.8076	11.4286
	3			20.1228	27.0089	25.5576	24.8607	24.7753	21.7883	19.1611	15.869	16.1798	17.7171	17.4747	14.6807	12.427
	4		18.3816	24.3095	27.4098	25.0492	22.8976	20.7007	20.5264	18.3189	15.3211	14.1603	14.9935	15.2543	15.5597	14.2593	12.0793
	5	13.9527	20.6759	24.6921	25.7178	23.3578	20.6548	19.7099	18.547	16.5097	13.4594	11.2409	10.3533	11.0491	12.2559	14.8174	16.0665	10.8462
	6	16.9831	25.8758	26.0265	27.0956	23.9137	20.4758	20.778	20.9123	18.7961	13.8957	10.2335	9.39195	10.0572	11.7495	16.7619	19.8847	15.3303
	7	23.9507	30.7831	29.9867	26.7216	24.7578	18.9803	19.7473	20.7263	19.1247	14.6951	10.3461	10.3057	9.64619	11.8684	16.7371	22.7385	18.347
	8	29.42	34.6674	32.1738	25.9361	22.1983	17.4317	17.4444	19.1723	17.3085	15.6255	12.8577	12.1992	11.074	12.4271	17.6231	22.549	18.4036
	9	29.8036	35.0476	29.519	25.5011	19.4301	16.0256	16.8761	18.2854	16.9064	15.2521	14.1576	13.6229	14.4055	14.9637	17.6847	20.7039	17.1322
	10	28.6933	33.2067	28.2023	23.1031	20.5109	18.6667	16.985	18.0745	15.5975	12.8298	13.4223	13.9432	14.7596	15.045	15.194	15.4295	11.6696
	11	29.0843	35.179	30.0852	27.1347	23.2353	21.0324	17.822	15.9278	14.3983	11.2067	11.2812	12.7941	12.4682	12.3276	10.1844	10.7261	8.44978
	12	26.3013	33.4215	28.9594	25.2299	23.7196	21.7957	17.4883	14.4316	12.8063	10.0416	9.71458	11.6883	13.2606	15.964	13.5455	12.6638	10.9105
	13	19.7944	25.7819	26.8884	24.1145	22.1776	19.4142	16.5316	14.0442	11.3568	8.38095	9.12058	11.2088	15.2484	19.9083	19.1856	16.0284	12.9294
	14		19.9239	22.4539	21.5011	19.2723	16.3903	14.479	12.5368	9.88912	8.43983	7.90229	12.6798	13.6757	18.6126	17.6667	13.5724
	15			15.903	16.5127	14.3466	12.8536	12.8323	12.2929	11.9749	10.952	10.8679	11.8418	10.9872
	16				11.2693	11.4643	13.7244	15.2197	17.0763	16.2563	15.9392	9.76858
	17					9.41263	12.3539	13.7102	15.7689	15.3723
2	1					14.9769	21.552	22.0159	18.8667	14.2854	12.1798	10.2227	11.5268	9.08259					2																		2
	2					25.5922	27.1298	26.2268	23.9182	20.6585	16.8404	14.6861	14.654	13.1333	10.2242
	3			20.5969	26.1022	25.2935	24.7928	23.8719	24.4709	22.6036	19.5209	18.6777	19.2549	18.1447	14.9181	11.7969
	4		18.1882	24.9504	27.7009	24.6966	21.9642	21.3624	23.185	22.1926	19.0215	17.7382	18.2743	16.046	15.6565	13.7301	13.0246
	5	12.9244	19.3991	24.826	25.8629	23.7393	20.3915	22.3929	23.0457	21.6652	16.7821	13.5581	13.5772	12.9723	12.9156	14.7609	15.8631	9.56532
	6	16.8408	26.7204	27.3333	28.51	25.8543	22.2975	24.2203	25.1864	23.5054	17.3425	11.9852	11.3467	11.518	12.5828	16.3009	19.2306	14.3454
	7	27.2548	33.1022	31.6741	27.8125	27.0626	21.3969	22.4771	24.3184	21.6695	17.1983	11.4379	11.705	11.5253	11.438	16.5806	22.2368	20.1978
	8	29.0422	35.746	33.6757	26.8482	23.757	18.9956	20.4227	21.464	18.5455	16.2818	12.3417	12.613	12.3163	12.4149	17.3125	23.0478	20.5169
	9	26.5959	34.9722	32.2045	27.7121	22.2076	19.7288	20.8098	21.7325	18.2716	15.2083	13.3243	14.0795	14.7966	16.0536	18.3599	22.4132	18.0966
	10	23.7494	31.8349	30.4645	25.4187	22.3823	20.349	17.8026	18.2611	15.9663	13.5208	12.7328	14.2096	15.1886	15.2265	15.4892	16.5509	11.9911
	11	24.7629	30.4628	30.262	26.1875	22.779	21.6309	18.0743	16.2089	14.0504	10.8154	10.7598	11.9191	12.0317	12.1493	11.4143	12.7199	10.0909
	12	22.1582	29.5785	27.4673	24.7679	22.8596	20	16.9474	14.5157	12.4116	9.23395	8.96901	11.3181	13.6946	16.4034	16.0283	14.7792	12.1106
	13	18.1793	24.1457	26.3244	23.547	21.692	18.409	15.1631	13.7056	11.2836	8.1095	8.31612	10.3091	14.3708	20.7898	20.1804	17.0045	12.478
	14		19.8358	22.3571	21.6609	19.1627	15.8821	13.6603	11.7736	9.81081	8.35759	7.55487	9.9234	11.5946	18.3254	17.1559	13.3987
	15			16.4565	15.6489	15.0295	12.9104	12.5177	12.0605	11.4154	10.6479	10.3306	9.62708	9.19272
	16				11.9706	12.3766	15.1471	15.8973	17.1111	15.691	15.7785	9.96588
	17					10.6956	14.3907	15.3677	15.9804	15.3821
3	1					17.0591	21.4664	21.2365	18.4709	13.3408	10.9712	10.3128	10.625	9.66222					3																		3
	2					27.7399	27.5955	25.8318	23.8018	19.7633	16.3872	14.0969	15.837	13.0222	11.0067
	3			20.4238	26.7205	26.0312	26.2819	25.2578	24.9956	23.4333	19.0957	16.663	18.937	17.9231	15.7982	13.2639
	4		17.5053	24.9422	28.5917	24.2428	21.6424	22.1214	24.3145	22.2303	17.9122	16.1017	17.5577	17.1329	17.0152	15.7181	13.6372
	5	12.1797	20.1104	25.9851	28.4513	24.6356	19.5676	21.9037	23.1422	21.1038	15.327	12.0869	12.4421	12.3907	13.9227	17.6601	17.2594	10.4523
	6	15.5198	26.1635	28.4444	29.9889	25.1228	19.8319	23.6211	24.4022	22.8153	15.37	11.6092	10.1987	10.4738	11.4925	18.3462	22.2181	15.9038
	7	27.0085	33.8981	31.9157	27.7906	26.0244	19.1867	22.0395	24.9638	23.2081	17.7642	11.7724	11.0522	9.98326	10.63	17.1175	22.6196	20.0336
	8	31.869	37.5463	35.0045	25.7677	22.7891	18.5908	19.615	23.9242	21.2115	17.6597	12.9666	11.9768	12.044	11.5835	16.8844	22.159	18.8161
	9	30.5261	37.5734	32.6107	26.0307	20.3098	17.0042	18.317	21.4346	20.7479	16.81	13.0355	13.5021	14.2199	15.0934	17.227	20.9083	16.9888
	10	27.2946	34.3543	29.8789	24.3495	20.5478	18.5835	16.2211	19.1237	18.3048	14.8509	12.3805	13.8151	14.9895	15.1019	15.5043	16.5841	11.625
	11	26.3872	33.9955	31.0022	26.9386	23.2077	19.6454	17.0399	17.3257	16.215	11.9336	10.5343	11.3319	12.0419	13.0872	13.2355	14.013	10.0824
	12	23	30.7987	28.9073	26.7709	23.5087	19.9197	16.1062	14.4656	13.0247	9.79794	9.83918	11.5992	14.1411	17.2627	16.7965	15.3601	12.7152
	13	18.1975	25.5011	25.7352	24.1771	21.0577	17.5729	14.4454	13.9148	11.0062	8.82438	9.33884	11.6992	15.6379	20.1809	19.5913	16.3646	12.1245
	14		20.5903	21.6167	20.3675	16.7818	14.2243	13.019	12.5156	9.90062	7.83644	8.01242	12.0041	13.7862	18.4111	16.1039	12.3551
	15			15.9523	14.9427	12.8898	11.1646	11.4361	11.6785	11.9191	10.5788	10.948	11.6021	11.2675
	16				10.781	11.4304	13.7015	15.3008	16.6316	15.1408	14.4168	9.35669
	17					9.84034	12.9936	14.9638	15.5837	14.5151
4	1					10.9843	17.0406	18.7675	17.036	12.3051	8.85746	7.42605	8.23673	6.99556					4																		4
	2					22.0695	23.1742	23.1996	22.408	17.7952	12.8921	10.7467	11.8896	10.1086	7.85111
	3			19.3158	24.0643	23.553	23.7706	23.2639	22.5254	19.9127	15.7566	15.1004	15.7615	14.1485	11.6272	11.2308
	4		17.3298	24.5043	27.3533	24.1663	22.3502	21.5736	21.3011	19.6848	16.0758	15.5246	15.0691	14.4246	12.4143	11.9868	10.3326
	5	12.9561	20.8386	27.0512	28.0991	25.2456	20.3084	20.2571	20.7381	18.7613	15.0942	12.6794	12.6255	11.7045	11.8664	14.0976	12.7253	8.07175
	6	15.0211	26.2088	29.3188	30.8004	26.3554	21.2914	22.8004	23.1895	20.9274	15.2463	12.2447	11.1755	10.3319	11.6098	14.5974	17.2397	11.9267
	7	28.2277	34.4397	32.0615	28.6519	26.5642	20.9825	22.6849	23.5525	21.4435	16.6245	12.334	11.7028	10.3228	11.546	15.2172	20.9584	16.4254
	8	32.5189	37.613	35.0737	26.6776	24.5085	20.3391	20.9349	22.6013	19.5244	16.9916	13.501	12.4735	11.8132	11.9893	16.6134	22.137	19.3038
	9	30.6569	36.9224	31.6467	25.8156	20.6596	16.4374	18.1949	20.5832	18.4622	16.1795	14.3236	14.5303	14.7979	15.4625	17.3533	21.102	17.8728
	10	29.2715	34.1739	29.8814	23.5	20.5699	17.6348	15.8109	17.4507	16.0358	14.1553	13.5631	15.0919	15.4968	14.1609	14.9871	16.8562	12.976
	11	29.6882	34.6023	30.036	25.3636	22.5567	19.4936	16.7937	15.3816	14.1157	10.6542	10.9048	11.8981	12.2821	11.7225	10.7901	12.6998	10.2948
	12	26.2232	33.8492	29.7788	26.6903	22.6334	19.9893	16.6492	13.9688	11.9008	9.05773	9.14669	11.59	13.4873	14.8047	14.6444	14.4065	12.1663
	13	20.483	26.549	26.9603	24.0349	21.7797	17.4225	15.182	12.7708	10.1012	8.01856	8.43271	11.7164	16.0921	20.6132	20.2484	16.8972	12.954
	14		20.3299	22.693	21.1641	17.9786	14.355	13.3208	11.4428	9.73967	8.28807	7.31056	10.7681	13.1858	18.5529	17.9956	14.5044
	15			16.1524	16.0805	14.4325	11.8601	11.9397	11.5229	11.4407	11.5664	11.225	10.3703	10.0513
	16				12.5975	13.7841	15.2573	16.5562	18.2744	17.2899	17.1649	10.0597
	17					11.9598	13.6602	15.4829	17.4418	16.8061
5	1					9.65548	14.392	15.6459	15.8943	11.5485	8.65939	8.122	9.13755	9.42391					5																		5
	2					20.6733	20.0133	20.7095	20.3991	16.6732	12.6296	11.9891	13.6739	12.256	8.75877
	3			18.4661	23.0905	23.8062	23.5597	23.1394	22.9694	19.7707	15.3275	15.5292	17.3499	16.4667	12.4728	10.4161
	4		16.1774	23.6253	26.3632	24.9185	22.5777	22.2022	22.6234	20.8844	16.0968	15.2542	16.74	14.5983	13.0364	12.0519	9.67756
	5	13.8101	21.7379	26.3276	26.3473	24.7108	21.3465	22.0457	23.0667	19.9342	14.9936	12.6271	13.2269	11.1624	12.8426	13.9957	13.5587	7.46187
	6	16.3779	26.3122	27.2926	28.3653	26.3516	22.8017	24.9542	25.6294	21.9428	15.3291	12.1069	11.069	10.8761	11.8101	15.9807	17.5164	12.0919
	7	25.3326	32.7403	31.1291	28.4496	28.3422	22.2112	23.4561	24.8326	22.8301	17.7311	11.9295	11.6499	11.636	11.7453	17.1818	20.2031	15.8044
	8	29.3899	35.9212	34.0662	27.989	24.8726	20.4387	20.3355	23.3634	22.3543	18.2704	13.048	13.3159	13.5971	12.8586	17.2818	20.5336	16.5642
	9	29.9487	35.774	32.3833	26.628	21.3474	17.3054	18.9241	21.3418	20.7622	18.0103	14.3152	14.7975	16.0669	16.0766	17.1816	19.6492	15.219
	10	25.8345	32.5067	29.7748	23.5118	20.2314	17.9407	16.9408	18.8716	18.5263	15.6885	14.3753	15.4458	16.3536	16.161	14.8326	15.0733	10.9693
	11	25.6645	33.4334	30.7516	26.4967	22.4829	20.3553	17.3208	17.1345	16.2355	12.5644	12.1273	13.0309	13.4572	13.1057	11.1535	11.2234	8.2244
	12	24.5714	32.8184	30.5526	26.8114	24.039	20.2946	17.286	14.6799	12.5277	9.83469	10.039	11.2206	13.9543	15.2966	14.3026	11.5349	9.3731
	13	20.8598	26.9956	27.7238	24.8433	24.2296	18.6317	16.071	13.8634	11.8228	9.12883	9.50205	11.407	14.5485	19.0106	17.8268	14.0043	10.4847
	14		21.0566	22.4635	22.7201	20.9808	17.5756	15.0271	13.9503	11.5553	9.3614	8.08589	10.961	11.1017	17.0423	15.5717	11.4989
	15			16.5335	16.6576	15.9231	14.2325	13.8601	12.965	12.0146	11.8381	10.6756	10.9566	9.30444
	16				12.3588	14.8822	16.869	16.8285	19.2158	17.575	17.0021	9.74214
	17					12.6841	16.9894	16.4506	18.0927	16.6069
6	1					10.164	15.2517	17.2573	15.7329	11.5439	8.72088	8.34945	8.49558	7.00441					6																		6
	2					19.1942	20.4643	21.5	21	17.4044	12.6397	11.8818	12.37	10.1031	7.96529
	3			18.0153	21.8824	21.8625	21.7428	24.3659	24.1973	20.8391	16.4815	15.5066	16.1068	14.9481	10.9871	9.55603
	4		16.5896	23.8323	26.3697	25.8455	24.1316	23.9011	24.6315	20.4596	16.6352	15.4589	16.5339	14.9036	11.9122	11.4335	7.8121
	5	12.9873	21.0679	26.4488	28.5619	25.0443	23.0352	24.4052	23.4502	19.7188	14.3486	12.5407	13.069	12.0611	10.2135	11.6194	11.8211	6.33115
	6	17.0042	27.8351	29.4551	30.8049	27.4346	24.8096	25.321	25.0087	21.9642	15.1336	12.1044	11.3354	11.0943	11.1915	13.8957	15.4654	9.6864
	7	26.8517	34.4516	32.3758	29.6813	29.114	22.6013	22.8211	24.7186	22.8565	17.0271	11.7724	11.8956	11.021	9.97895	13.8309	18.2479	14.0632
	8	31.5011	38.2114	35.2987	29.0764	26.0557	20.5687	20.4194	22.4367	20.4126	16.9091	12.6133	13.0062	11.7579	11.2908	14.3284	19.2215	16.0721
	9	29.7817	36.1781	31.6947	26.9111	21.2745	19.1402	19.5535	20.2833	20.0252	16.3913	13.6701	14.1491	14.1134	14.1723	15.3084	18.2655	15.4314
	10	26.302	32.7558	29.5473	24.4248	21.1745	18.5649	17.2606	18.0106	17.2902	14.2423	12.9048	14.3698	13.4633	13.9576	13.4085	14.3197	10.5996
	11	28.0938	35.2309	30.6077	26.4801	24.4471	19.8248	17.4989	16.7197	15.453	12.3807	11.9155	12.6729	12.2998	11.5811	10.9426	10.7247	7.65293
	12	25.5097	33.836	29.8613	25.6696	24.3918	20.4503	16.7652	14.8979	13.1091	10.3436	10.5267	12.0934	14.4551	15.8101	14.9077	12.4602	10.2359
	13	20.6097	26.4418	26.4214	25.4634	23.4818	18.1495	15.4678	13.9127	11.6865	9.06598	9.3299	10.9855	15.9397	20.3439	19.2275	15.3297	11.1689
	14		20.1461	22.7447	22.588	19.3571	16.334	14.0208	12.7391	10.5216	8.5134	7.60825	10.0103	12.3905	17.2479	17.1266	11.8634
	15			16.0498	16.6618	15.2646	12.9191	13.0708	12.6154	12.5258	12.1854	11.5868	11.1054	10.1218
	16				11.4045	13.9315	17	16.5837	17.357	15.7	16.0651	10.2674
	17					11.346	15.3085	16.1128	16.5996	14.3276
7	1					9.80089	14.8837	16.5857	16.2721	11.7368	7.46035	7.2511	8.50441	7.38889					7																		7
	2					20.4554	20.2004	20.0334	19.8758	16.761	11.4031	10.444	12.0177	9.57489	7.61197
	3			18.2775	22.6376	21.9399	20.4437	21.8606	22.2445	19.311	14.9892	15.0588	16.3224	14.1444	10.0965	8.33479
	4		15.8624	23.0633	25.6667	23.06	21.2124	20.5219	20.939	19.4979	15.7633	15.9128	15.7028	14.4125	11.9545	11.0197	8.0044
	5	13.3397	20.6502	25.4205	26.1571	23.1419	20.2978	21.4814	19.7699	18.2814	14.0341	13.7616	12.805	11.6968	11.7694	12.6035	12.0044	6.3304
	6	16.2076	25.9893	28.1554	27.5243	25.0933	21.5398	23.3609	22.3341	19.7425	14.4872	12.6715	10.5283	11.105	11.6874	15.732	17.411	11.2444
	7	26.5841	32.7719	30.4547	27.5673	26.196	21	22.1438	22.3538	19.58	15.3108	11.9979	11.5378	10.2206	11.2017	16.6336	20.3893	14.9641
	8	28.9664	34.7928	32.9148	26.6416	24.0302	20.8188	20.3848	21.6915	18.2013	15.2197	12.9582	12.9102	11.5412	11.6348	17.0964	21.1106	16.0874
	9	28.1712	34.0343	30.713	26.5396	20.5011	17.9915	18.7255	20.2727	17.6242	14.4649	13.374	13.6923	14.0777	15.7024	17.2814	19.7817	15.3131
	10	25.1256	31.4191	28.3605	24.5465	21.4487	18.7818	17.2731	17.7738	14.8753	12.8156	12.4577	14.7101	15.1153	14.5203	15.1645	15.7741	10.6622
	11	27.1982	33.3288	28.9955	25.9333	23.4406	19.9509	17.5938	16.1996	13.9313	11.4277	11.6953	12.7004	13.0858	12.0362	11.6151	10.7987	8.94
	12	20.9194	30.2596	28.4978	25.3184	23.6645	19.7236	15.7755	13.6339	11.7335	9.51329	9.64139	11.6674	13.8794	16.3439	15.5076	13.9281	11.6203
	13	16.1684	23.4791	25.2668	23.7429	21.5819	17.6568	15.0412	13.7766	10.4057	7.98569	8.53484	11.9037	15.5505	21.0211	20.4978	17.1385	12.1933
	14		18.9078	21.5011	21.1631	18.2314	14.6499	14.1014	12.0246	9.61633	8.03673	7.42449	11.0698	12.8859	18.6752	17.7416	14.0626
	15			15.7651	15.6356	13.6183	12.1074	12.3789	12.1906	11.0885	11.9305	11.791	11.3546	10.7043
	16				11.4517	12.868	15.289	16.7988	17.3071	15.4927	16.1761	10.5455
	17					12.8716	15.8184	17.0149	16.1652	15.2252
8	1					9.17528	13.2864	14.8976	14.5244	11.1121	7.4702	7.7965	9.36761	7.8208					8																		8
	2					18.7517	18.6719	19.1759	19.3628	15.8009	11.4575	10.7522	12.8908	10.5604	7.67912
	3			16.2987	21.8398	22.0333	20.3978	22.1106	21.4547	18.9326	15.1304	13.7922	15	14.0022	10.6035	8.15939
	4		14.8584	21.0821	24.685	22.6962	20.9912	20.6732	21.0828	19.2987	16.2339	14.6315	15.0814	13.5431	11.4378	10.162	7.75764
	5	12.3192	18.947	23.1678	25.8615	23.7323	20.2254	20.75	20.7549	19.0929	15.2344	12.1627	10.9275	10.141	10.0021	12.3841	12.149	7.34279
	6	16.0106	26.5608	26.6711	26.7339	23.5996	21.0263	21.2061	21.9127	20.5443	16.3665	11.4851	9.14925	8.93177	10.4979	13.7602	16.784	12.4304
	7	27.0728	32.1198	30.7894	26.4624	25.3836	19.4847	19.7922	21.2286	20.3226	17.5233	11.0191	9.53731	8.50424	9.94904	14.0299	18.4233	14.633
	8	30.0157	35.631	33.5256	25.1451	22.1013	18.8258	17.4978	18.8763	17.7149	16.0085	12.3376	10.5053	10.089	10.7436	14.8737	18.9091	15.7434
	9	28.0752	33.8912	29.0487	23.6957	19.469	15.3632	15.4411	16.7574	17.034	15.2611	13.5338	11.6191	12.4648	13.6595	16.1373	18.4372	15.0587
	10	24.5766	30.5987	27.3648	21.0565	18.9935	16.1809	14.203	15.8589	14.7865	13.6702	13.2458	12.6356	13.276	12.8587	12.7004	13.9717	9.66228
	11	28.2396	33.5045	29.1447	24.8348	21.5139	17.7383	14.7731	14.8884	13.59	11.4154	11.2034	11.9368	11.9809	11.7179	10.2403	10.9071	7.63676
	12	25.6354	32.0854	29.4181	26.263	22.6183	18.4156	15.28	13.6442	11.8664	9.47708	9.23173	11.8245	13.6149	15.5192	14.4104	12.207	10.4553
	13	20.4658	25.4176	26.0781	24.1601	20.9936	17.1055	15.3529	13.7368	11.3688	8.36117	9.58038	11.6952	14.9747	19.438	18.6397	15.1769	11.2384
	14		19.3032	20.7447	20.8376	18.2495	15.4307	14.1715	13.0943	10.7792	8.71608	8.39666	11.4696	12.3004	16.7548	15.4427	11.1626
	15			14.9917	14.7373	13.9051	12.8742	12.4622	12.9308	12.3634	11.6751	10.7853	11.5759	9.50647
	16				10.6522	12.9456	15.8424	16.5085	16.428	15.7335	15.7686	9.76559
	17					12.4283	14.6438	15.8362	15.9763	14.8646
9	1					9.75824	14.6637	15.2494	14.233	9.12967	8.33043	6.61255	7.51522	6.22004					9																		9
	2					18.8769	19.0725	18.6615	17.5285	13.7326	11.1231	8.73002	10.4729	8.90239	6.53362
	3			17.1703	21.2873	21.6747	21.1272	21.6856	20.1532	16.9374	13.0431	12.2354	14.1128	13.4804	10.6833	9.31169
	4		16.0828	21.7045	24.9956	24.2423	22.6616	21.9651	21.1562	18.4142	14.2013	12.697	14.6115	14.3125	11.8258	11.2181	9.03463
	5	13.7395	20.1118	25.6509	26.9737	24.3929	21.5164	22.4227	21.9914	18.5288	14.0932	11.5609	10.7284	10.9957	10.6445	12.6767	11.6307	7.11472
	6	17.4217	27.2679	28.6429	28.7237	25.4702	21.8534	23.79	24.0129	21.0802	15.0654	11.283	10.818	10.384	11.0594	14.3276	16.6732	10.9281
	7	27.375	33.1616	31.5877	28.0332	27.178	21.0196	22.8384	23.5851	20.2267	16.1843	11.5375	11.3403	10.6987	11.2431	14.8617	19.3853	15.3202
	8	30.9143	36.3087	33.9868	27.2891	25.2723	20.6911	21.5517	22.4386	19.0911	16.0042	12.8601	12.4948	11.12	12	15.9531	19.4828	15.9079
	9	28.5965	35.1525	29.6815	26.9482	21.0064	18.6379	19.9614	21.0447	18.1635	15.2839	14.0499	13.8975	14.271	14.4383	16.0726	18.3125	14.4478
	10	26.0536	32.1308	27.3689	24.5108	20.2833	18.0021	17.2368	17.9516	16.728	13.7371	13.7635	14.9585	14.977	14.1702	13.7842	14.7527	10.7336
	11	28.6987	34.7751	29.8641	25.6623	22.9204	19.3915	17.0042	17.0587	15.2599	11.7835	11.066	12.1983	12.0521	12.3559	9.79657	11.3683	9.28478
	12	25.2077	34.3665	29.9358	26.8562	23.1161	20.3114	17.5726	15.7086	13.2907	9.56379	9.22177	10.9274	13.5428	14.8512	13.5702	12.4925	10.1302
	13	21.5136	29.0935	28.7193	25.6775	22.453	19.2178	16.1975	14.764	11.6803	8.28395	8.4271	10.1402	13.453	18.8632	18.1116	15.4698	11.3414
	14		20.7925	23.7097	23.8782	19.2144	15.3556	13.7867	12.3409	9.70988	8.2284	7.41649	10.4474	10.7745	16	16.3534	12.7241
	15			16.3139	16.2395	14.222	11.7075	10.7095	11.3527	10.8719	11.6611	11.6653	10.3278	8.78511
	16				11.1677	12.1618	14.316	15.5187	17.4791	16.6261	15.8523	10.5558
	17					10.9623	14.2182	15.6488	16.1447	14.8764
10	1					10.7212	15.9511	17.3103	14.9604	10.3646	8.30501	7.26144	9.77609	9.0919					10																		10
	2					20.7644	20.7216	21.3154	19.4345	16.3442	12.9696	12.0562	13.7712	10.5413	8.52193
	3			17.8721	23.1351	23.4216	22.3311	21.9845	22.3736	19.3543	16.29	15.9523	17.2	14.5238	11.4199	8.98261
	4		13.1374	22.2985	26.9187	25.9379	22.2298	21.6193	22.3182	19.7234	17.7747	16.5338	16.0042	14.4115	11.3648	10.9306	8.18261
	5	11.0127	18.4895	24.4957	27.3642	27.057	22.1225	21.7908	22.0711	19.2918	16.4883	14.1755	12.4021	10.9726	10.6553	12.2543	11.9284	5.8366
	6	13.3298	24.0488	26.4706	29.3128	26.826	23.4664	23.3696	23.5087	22.3263	16.6793	13.3432	11.9116	10.3257	11.1954	14.4872	15.7127	11.0065
	7	25.0468	31.2035	29.1075	27.4559	27.0242	21.9107	22.5358	24.7331	22.8731	19.5359	12.7317	12.2227	10.6387	10.4177	15.1261	18.6825	15.4636
	8	29.4245	34.6538	32.9444	26.4923	24.1688	20.7597	20.1061	22.6771	21.3568	20.0798	14.7782	12.921	11.0565	11.0527	15.4081	19.4108	16.2217
	9	29.1889	35.2081	31.7067	26.7277	21.3019	17.9301	19.0594	20.9427	20.178	19.1167	15.9855	13.9434	13.852	14.3439	16.2367	18.6768	14.7263
	10	24.304	32.0958	29.7175	25.4694	21.8605	20.0149	18.0837	19.7547	18.2646	17.4525	15.1203	15.0478	14.1715	13.9958	13.9915	14.4168	9.96288
	11	25.7186	33.7339	30.9977	28.082	24.4261	21.6996	19.0146	18.2025	17.0564	14.2658	13.2314	13.8385	12.2164	11.2115	10.6432	10.7484	7.81004
	12	23.0917	31.2604	28.8505	26.5987	25.0759	22.4435	19.2354	17.3173	14.3926	11.1939	11.2854	13.0353	13.9559	15.2766	13.5474	12.0022	9.73961
	13	17.1803	24.1616	25.1824	23.9825	22.4013	19.1383	17.4484	15.4553	12.4713	9.86242	10.8098	12.4547	15.2317	18.5991	18.0412	13.7943	11.0154
	14		17.9477	21.0215	20.8051	19.0989	16.92	14.9057	13.5542	11.5897	9.97741	9.79918	11.9754	13.5694	18.0792	15.0683	10.8505
	15			14.7983	15.4948	14.0647	13.1733	13.8836	13.1816	12.2958	12.0854	12.188	11.8399	10.5246
	16				10.1729	13.2469	15.407	16.2614	16.6004	15.7824	15.6333	10.6907
	17					11.7328	13.7158	15.1578	15.4392	14.6346

## Sheet: BT
NumberOfStartingPointsBT
Signals of insufficient quality were excluded from the property maps. Signals could be rejected based on noise low amplitude, large artefact or ventricluar farfields that could not be substracted. Breaktrough can only be identified if a contiguous circle of electrodes enclose the electrode of interest. Therefore electrodes at the border or around a missing electrodes are excluded.
	1	1	2	3	4	5	6	7	8	9	10	11	12	13	14	15	16	17
1	2																		1																		1
	3						5	8	7	5	5	3	2
	4						11	15	5	3	8	8	3	2
	5				8	7	10	10	3	7	13	10	3	7	0
	6			6	9	4	5	4	8	5	15	21	4	4	6	5
	7		7	30	14	6	9	13	12	4	6	2	1	2	2	0	3
	8		20	17	18	7	5	12	12	7	11	3	0	1	2	2	0
	9		25	6	4	1	5	7	12	9	4	2	1	5	6	3	3
	10		16	9	21	15	12	4	8	5	4	4	5	6	2	4	3
	11		27	19	15	11	16	4	6	8	3	6	6	5	1	1	2
	12		11	9	6	8	16	8	12	7	3	2	0	3	7	15	1
	13		5	6	2	15	11	5	4	4	2	2	0	3	0	3	2
	14			9	6	10	8	2	4	2	3	1	0	3	0	1
	15				6	7	12	6	7	6	2	3	1	0	0
	16					6	9	7	1	4	0	0	0	0
	17						2	2	3	0	0	0
	1
2	2																		2																		2
	3						10	5	8	8	9	9	0
	4						10	10	8	8	11	4	3	2
	5				12	10	15	8	8	11	5	5	1	10	0
	6			11	15	9	3	16	7	18	16	24	6	8	5	3
	7		6	34	17	6	25	16	16	9	5	9	2	7	1	1	4
	8		30	17	11	5	13	15	10	10	8	6	0	5	1	1	1
	9		20	4	4	4	3	20	16	5	7	5	6	8	4	8	2
	10		5	9	17	5	9	6	13	10	9	3	5	7	4	5	3
	11		25	22	16	19	24	9	10	13	9	2	5	4	1	4	2
	12		5	8	12	10	13	6	9	8	5	3	2	2	5	12	0
	13		10	4	7	17	8	5	7	8	2	1	0	3	1	4	2
	14			13	16	12	6	4	3	3	0	0	1	1	4	0
	15				8	18	17	5	2	7	1	3	0	0	0
	16					4	8	5	4	5	0	0	0	0
	17						6	7	2	0	0	0
	1
3	2																		3																		3
	3						8	8	8	8	10	4	2
	4						14	16	9	12	6	7	1	1
	5				20	7	18	11	11	8	14	6	2	13	0
	6			7	20	11	6	9	12	8	15	22	3	8	7	10
	7		13	19	15	5	11	19	12	11	4	8	3	7	2	2	2
	8		26	12	16	9	8	12	7	9	8	4	6	6	0	1	2
	9		29	4	15	3	4	9	14	9	7	3	2	5	6	9	4
	10		13	11	25	10	7	1	6	10	6	0	12	8	2	0	2
	11		19	14	21	14	21	6	12	15	11	3	4	9	2	0	0
	12		13	8	8	8	15	5	6	6	6	4	2	5	7	13	0
	13		5	10	6	23	15	8	7	8	6	1	0	3	0	3	3
	14			12	14	9	4	3	4	7	0	0	0	3	3	1
	15				6	8	10	1	6	3	1	1	0	0	0
	16					5	6	5	3	3	1	0	0	0
	17						1	5	2	0	0	0
	1
4	2																		4																		4
	3						8	5	9	8	9	5	1
	4						15	11	14	15	12	11	1	0
	5				14	13	8	9	11	7	9	12	3	10	1
	6			7	11	10	3	10	11	6	29	25	7	8	7	4
	7		11	36	22	5	15	13	18	17	3	7	5	7	2	1	1
	8		26	15	18	7	7	8	8	11	2	2	2	3	2	3	3
	9		33	4	13	5	0	2	12	9	7	6	3	4	5	7	6
	10		17	11	17	7	5	3	5	6	8	0	3	9	3	3	2
	11		25	22	13	9	9	3	10	11	9	2	4	7	0	1	1
	12		13	10	10	9	11	8	5	10	2	4	0	4	9	11	1
	13		9	6	8	23	6	4	4	9	1	2	0	6	6	3	6
	14			15	21	14	3	2	1	1	0	1	0	2	3	1
	15				9	10	16	7	5	4	0	0	2	0	0
	16					3	16	4	1	1	2	0	0	0
	17						11	4	0	0	0	0
	1
5	2																		5																		5
	3						5	9	9	10	6	5	5
	4						12	10	9	10	6	4	3	0
	5				7	5	13	13	10	14	9	8	4	19	1
	6			4	8	3	10	15	6	13	11	20	8	9	10	3
	7		9	24	17	13	40	17	17	9	6	5	1	2	5	3	0
	8		22	20	12	8	11	11	9	9	12	12	0	2	0	1	3
	9		29	9	14	3	5	5	17	10	10	5	1	10	12	15	10
	10		15	16	23	11	4	8	13	9	6	3	3	10	11	11	5
	11		27	27	15	7	18	7	14	14	17	4	9	12	3	3	0
	12		9	8	10	12	17	13	14	8	4	6	2	5	9	16	0
	13		4	3	6	23	12	6	8	6	9	3	0	6	6	6	2
	14			13	19	15	9	3	1	2	2	2	1	3	2	1
	15				8	8	12	1	7	10	3	1	1	0	0
	16					8	11	8	1	4	4	0	0	0
	17						6	2	3	0	0	0
	1
6	2																		6																		6
	3						6	7	4	5	7	5	4
	4						8	12	7	4	4	5	0	1
	5				14	9	14	6	11	6	13	6	0	8	1
	6			9	15	8	7	17	13	10	17	21	3	5	10	6
	7		14	25	13	9	22	20	14	16	5	6	6	4	1	0	1
	8		19	22	18	16	15	7	9	11	11	2	2	3	1	2	2
	9		28	13	7	2	9	8	7	8	1	3	1	6	10	7	5
	10		14	14	29	5	9	2	4	4	7	3	1	7	5	3	5
	11		18	12	13	12	23	6	5	9	8	6	7	8	0	1	1
	12		7	7	7	6	11	6	7	10	8	7	4	2	10	15	2
	13		3	6	6	23	6	11	9	6	7	2	0	2	3	5	2
	14			15	20	17	12	2	5	4	0	4	0	4	6	2
	15				2	6	17	6	13	4	3	1	0	0	0
	16					3	8	8	1	0	1	0	0	0
	17						7	4	3	0	0	0
	1
7	2																		7																		7
	3						2	6	7	6	3	0	0
	4						5	9	11	9	6	6	2	0
	5				12	8	7	7	13	14	9	4	1	10	0
	6			10	8	6	2	13	7	13	16	19	7	2	3	1
	7		9	27	18	6	22	10	12	10	6	8	4	1	0	0	2
	8		22	12	14	12	5	8	9	6	3	7	2	4	1	1	1
	9		30	6	10	4	5	7	13	7	5	5	3	4	6	5	3
	10		13	11	24	7	9	4	4	7	8	3	9	5	6	2	4
	11		15	16	11	7	16	3	9	16	8	4	3	5	8	2	2
	12		9	5	10	11	12	9	3	9	1	4	2	6	7	19	2
	13		3	2	4	15	9	7	5	7	2	3	2	5	2	2	0
	14			14	9	10	2	2	2	2	0	0	2	3	6	1
	15				3	6	9	7	1	4	4	2	1	0	0
	16					2	9	9	2	1	1	0	0	0
	17						3	4	2	0	0	0
	1
8	2																		8																		8
	3						3	4	7	8	9	6	0
	4						14	11	9	6	6	6	4	2
	5				20	7	14	8	9	11	8	4	0	9	2
	6			7	13	6	7	5	8	6	19	16	8	4	5	1
	7		7	21	12	7	24	9	14	5	3	4	3	3	0	2	0
	8		20	15	14	9	7	12	12	6	6	7	1	2	0	0	1
	9		13	7	10	1	2	8	14	3	4	1	2	1	5	5	2
	10		17	11	18	8	6	0	8	6	5	3	0	4	2	3	3
	11		19	14	6	11	13	7	9	8	11	2	2	8	1	1	2
	12		11	9	6	9	13	4	6	8	4	2	0	5	4	14	0
	13		6	3	4	25	9	7	6	2	5	0	0	8	6	3	2
	14			8	16	18	11	4	1	3	0	2	0	0	1	1
	15				7	14	11	6	4	6	3	2	1	0	0
	16					3	11	5	4	1	1	0	0	0
	17						6	6	4	0	0	0
	1
9	2																		9																		9
	3						5	7	12	8	5	3	2
	4						19	14	10	3	4	2	2	2
	5				13	8	24	6	5	7	7	2	1	8	1
	6			13	13	9	5	5	9	11	12	13	8	9	3	1
	7		18	32	20	3	31	16	16	9	3	3	1	3	3	0	1
	8		36	12	14	10	15	17	10	12	5	4	2	3	3	2	0
	9		24	9	9	11	4	17	13	6	6	2	2	5	13	10	9
	10		11	12	24	12	12	6	11	9	13	6	4	8	4	4	4
	11		23	16	10	8	13	8	10	13	4	3	4	8	3	1	0
	12		7	7	8	9	13	13	4	7	6	9	2	6	8	16	0
	13		6	7	4	20	9	10	7	5	2	1	0	7	3	5	7
	14			13	15	12	8	5	4	2	0	0	0	1	2	4
	15				5	6	4	10	4	5	0	1	1	0	0
	16					3	4	3	1	1	0	0	0	0
	17						3	4	1	0	0	0
	1
10	2																		10																		10
	3						3	8	10	13	2	6	3
	4						14	12	13	7	6	6	2	0
	5				9	15	14	11	9	13	5	9	1	11	0
	6			9	15	7	4	13	12	15	13	13	8	5	8	2
	7		9	19	23	6	26	15	11	11	5	5	2	5	4	2	2
	8		31	20	16	8	18	17	11	9	7	8	3	4	1	1	0
	9		26	3	7	5	8	11	13	9	9	3	1	9	6	4	6
	10		7	15	24	11	16	9	14	12	6	7	3	10	1	5	2
	11		15	18	13	6	23	3	17	12	15	9	7	8	2	2	1
	12		6	9	9	9	16	12	10	11	10	2	2	2	8	14	0
	13		3	6	4	25	20	9	11	8	6	2	0	11	8	4	1
	14			16	16	14	11	7	7	2	1	3	0	2	5	0
	15				3	8	22	7	9	9	4	2	3	0	0
	16					7	11	8	3	3	4	0	0	0
	17						6	2	4	0	0	0

## Sheet: FI
FractionationIndices
Signals of insufficient quality were excluded from the property maps. Signals could be rejected based on noise low amplitude, large artefacts or ventricluar farfields that could not be substracted. Fractionation index is particularly sensitive to noise. Therefore electrodes with substantial noise are more strictly excluded.
		1	2	3	4	5	6	7	8	9	10	11	12	13	14	15	16	17
1	1					3.01149	2.76201	2.68807	2.30296	2.16404	2.0809	2.02018	2.08428	2.17873					1																		1
	2					2.66743	2.38149	2.32957	2.20993	2.06473	1.99553	1.92634	1.96629	2.06488	2.14955
	3			2.58259	2.20536	2.17833	1.99101	2.15056	2.19595	2.05077	1.78821	1.8114	1.85526	1.98462	2.09978	2.21681
	4		2.46053	1.43939	1.64588	1.48993	0.452116	1.47007	0.874449	1.28633	1.36853	1.26068	1.37419	1.53261	1.70499	2.08791	2.29295
	5	2.69032	1.30704	0.965066	1.66222	1.22	0.563474	1.03297	0.400438	0.339785	0.899573	0.869936	0.837259	0.942308	1.32903	1.77609	2.25277	2.54751
	6	2.00846	1.22912	2.11504	2.30889	1.44469	1.40969	1.33187	1.97368	1.14378	0.276596	0.37155	0.542373	0.599576	1.1606	1.55411	2.14412	2.75792
	7	2.57388	2.17787	1.66962	1.05791	1.69111	0.894737	0.681917	1.33621	1.33548	0.394456	0.299363	0.248408	0.158898	0.700637	1.38147	2.36264	2.87215
	8	4.41778	2.64494	1.614	1.77533	0.498925	0.926247	1.21351	0.961702	1.31064	0.446809	0.583864	0.440678	0.46723	0.773784	1.70021	2.51852	2.96637
	9	4.88488	5.22902	4.34452	1.78462	0.713978	0.165957	1.21368	1.32833	1.3	0.777311	0.728992	0.866525	1.22718	1.89957	2.30886	2.75	2.91189
	10	4.03556	4.22444	3.94104	2.48684	1.72391	1.56344	1.7094	1.46383	1.08898	0.878151	0.82563	1.07158	1.80638	2.18844	2.34052	2.66594	2.94053
	11	5.13082	3.77405	3.34753	2.9426	2.26797	2.19438	1.80297	1.38004	0.976939	0.732777	0.835417	0.915966	1.76059	2.29336	2.4577	2.73913	2.9345
	12	3.34716	4.13901	3.11964	3.26562	2.20088	1.80435	1.45223	1.23579	0.972917	0.594595	0.477083	0.935146	1.73517	2.33051	2.67316	2.869	3.05459
	13	2.52891	3.11013	2.88839	2.70044	1.94298	1.52361	1.40506	1.37474	0.773859	0.376812	0.482328	0.93737	1.62105	2.48401	2.95633	3.14629	3.28132
	14		1.90756	2.21053	2.01499	1.6234	1.1519	1.32143	1.18526	0.688285	0.346473	0.659044	1.19335	1.71339	2.72078	3.24062	3.25778
	15			1.4346	1.45551	1.01471	0.868201	0.985325	1.35774	1.44885	0.926931	1.38574	1.85443	2.5032
	16				1.05219	0.951782	0.845511	1.06472	1.37844	1.64286	2.00419	2.32696
	17					1.38445	1.5693	1.88453	2.09071	2.38745
2	1					3.01155	2.75621	2.49886	2.48736	2.41324	2.22697	2.22955	2.24777	2.36161					2																		2
	2					2.7235	2.40547	2.29478	2.33409	2.27679	2.13933	2.04709	2.12027	2.23778	2.34004
	3			2.63778	2.27111	1.99097	1.79955	2.07416	2.25561	2.11136	1.94066	1.87638	1.94725	2.08772	2.17035	2.28348
	4		2.56018	1.6681	1.60938	1.64719	0.534676	1.5481	1	1.43723	1.51398	1.48498	1.61123	1.68928	1.84683	2.13053	2.36384
	5	2.68467	1.57296	1.05507	1.70112	1.2427	0.505593	1.16336	0.480435	0.401728	1.01068	0.928118	0.930233	0.925532	1.37013	1.73696	2.28477	2.5518
	6	2.04883	1.3871	2.08889	2.49666	1.41704	1.43848	1.30617	2.28728	1.20343	0.408034	0.332627	0.575053	0.591966	1.15269	1.61255	2.30155	2.75621
	7	2.47109	2.16522	1.83036	1.11607	1.89709	0.991228	0.703704	1.45085	1.41151	0.506329	0.256842	0.251046	0.14557	0.660256	1.40215	2.45175	2.9618
	8	4.30222	2.46453	1.81406	2.11161	0.492473	1.19608	1.33987	1.03178	1.27061	0.465553	0.557652	0.449791	0.460722	0.721277	1.86853	2.56304	3.06998
	9	4.51598	5.4838	4.62045	2.14066	0.758475	0.277542	1.39744	1.30149	1.22947	0.75625	0.763598	0.912134	1.20975	1.897	2.28017	2.67912	2.99326
	10	3.83778	4.43349	4.13959	2.73719	1.71706	1.58887	1.97854	1.63482	1.07579	0.797917	0.91023	1.02306	1.79873	2.13462	2.38961	2.77434	2.95536
	11	4.97763	3.8465	3.68565	3.18973	2.25383	2.15451	1.74098	1.173	0.936975	0.682573	0.780538	0.894191	1.82664	2.28571	2.49892	2.81838	2.98004
	12	3.06783	4.15022	3.20542	3.4442	2.24781	1.81619	1.36211	1.00629	0.871102	0.548654	0.510331	0.929314	1.76151	2.38217	2.75599	2.97792	3.10398
	13	2.38877	2.98234	2.92889	2.66958	1.85714	1.41328	1.22034	1.20459	0.614907	0.303719	0.47314	0.848548	1.56667	2.48408	2.99555	3.14699	3.12335
	14		1.96822	2.08658	1.88627	1.47109	1.08	1.10526	0.983229	0.629938	0.351351	0.594203	1.09524	1.66112	2.69181	3.17149	3.13808
	15			1.46285	1.5	0.976842	0.83125	0.970772	1.21921	1.01458	0.83125	1.40333	1.8	2.43683
	16				0.968553	0.872385	0.89916	1.10901	1.23899	1.5595	2.07384	2.36809
	17					1.34461	1.61996	1.90753	2.08913	2.29476
3	1					3.28054	3.05381	2.89414	2.53363	2.34967	2.24169	2.14317	2.27716	2.58667					3																		3
	2					2.89013	2.55056	2.43722	2.31849	2.35841	2.15487	2.0022	2.18943	2.52993	2.58758
	3			2.62693	2.25109	2.38839	2.02013	2.24667	2.25221	2.37418	2.0587	2.04783	2.18043	2.21538	2.39254	2.54545
	4		2.32409	1.53747	1.60044	1.8196	0.450331	1.4702	1.12798	1.48188	1.65953	1.42585	1.59829	1.68192	1.88312	2.29956	2.65487
	5	2.64482	1.34167	0.761702	1.76991	1.3	0.529933	1.0372	0.381466	0.404661	1.1104	0.987288	0.945263	0.983015	1.36695	1.92375	2.5122	2.79379
	6	2.00625	1.1782	2.20044	2.41333	1.23661	1.48009	1.15859	2.1033	1.30998	0.35518	0.434874	0.658996	0.620545	1.1855	1.71183	2.42291	2.89709
	7	2.56263	2.14013	1.70067	1.12695	1.76444	0.984444	0.629386	1.3383	1.4034	0.543158	0.2881	0.250522	0.106695	0.693446	1.36752	2.35575	3.01119
	8	4.43231	2.62077	1.79464	1.93363	0.5	1.09628	1.34956	0.989474	1.40812	0.450734	0.605428	0.456842	0.442348	0.661734	1.7152	2.5098	3.09193
	9	4.86168	5.69977	4.67338	1.77851	0.705128	0.190678	1.29787	1.31224	1.29449	0.76618	0.787056	0.848739	1.24524	1.91295	2.17345	2.73799	2.91295
	10	4.20982	4.3565	4.1861	2.58022	1.63482	1.47146	1.70737	1.60377	1.16284	0.797101	0.814969	1.09664	1.76	2.05096	2.25	2.55819	2.86404
	11	4.99336	3.92857	3.57271	3.15351	2.2334	2.24204	1.72269	1.36952	0.987474	0.697095	0.748963	0.92437	1.73166	2.20851	2.32762	2.61339	2.84382
	12	3.12716	4.10398	3.20751	3.56608	2.54348	1.83087	1.48333	1.12109	0.874227	0.498969	0.437113	0.906054	1.75158	2.28602	2.5368	2.72885	2.91739
	13	2.43856	2.96937	2.83807	2.77538	2.00641	1.51797	1.29202	1.20998	0.651546	0.338843	0.43595	0.846473	1.55579	2.4617	2.79348	2.95197	3.03275
	14		2.07773	2.29122	2.05556	1.54661	1.09644	1.10127	1.0104	0.664596	0.349896	0.641822	1.21532	1.78407	2.68737	2.94589	2.96078
	15			1.36307	1.46285	1.0104	0.8125	0.960168	1.26514	1.03527	0.892116	1.39917	1.94375	2.43524
	16				0.921649	0.860707	0.949896	1.13278	1.43368	1.67647	2.10105	2.39278
	17					1.28782	1.64894	1.9383	2.14378	2.43534
4	1					2.7191	2.50564	2.386	2.28604	2.02673	2.0245	1.97792	1.98009	2.01778					4																		4
	2					2.53812	2.1991	2.20628	2.23282	2.05507	1.96696	1.9141	1.883	2.01552	1.99556
	3			2.57987	2.13717	2.02709	1.80401	2.11308	2.12583	1.96943	1.84211	1.75546	1.814	1.76419	1.85746	1.99341
	4		2.41064	1.50641	1.60444	1.68736	0.497797	1.45055	1.05714	1.46957	1.49134	1.32762	1.40821	1.37716	1.49024	1.80044	2.15044
	5	2.49791	1.30818	0.78678	1.70925	1.23894	0.636564	0.989011	0.487013	0.35914	1.01713	0.893843	0.87234	0.867238	1.1681	1.55531	2.08791	2.32886
	6	1.82316	1.1691	2.15721	2.45233	1.30905	1.13907	1.20833	2.00654	1.06838	0.346072	0.407173	0.56871	0.591489	1.04691	1.49784	2.06318	2.47556
	7	2.5383	2.25431	1.81319	1.19512	1.77212	0.938731	0.706783	1.46895	1.43923	0.436709	0.25	0.214437	0.198312	0.66167	1.41075	2.21444	2.67483
	8	4.54788	2.68009	1.78795	2.06798	0.525532	1.01304	1.24729	1.05757	1.39703	0.353684	0.51782	0.430998	0.496815	0.866953	1.79482	2.37174	2.78714
	9	4.94582	5.76941	4.52889	2.03688	0.61945	0.167728	1.28908	1.32632	1.34664	0.787056	0.736952	0.8	1.23191	1.94004	2.20985	2.5705	2.84245
	10	4.47059	4.47826	4.21924	2.65419	1.61441	1.52229	1.80882	1.44444	1.10737	0.834369	0.832298	1.0501	1.73996	2.10515	2.22747	2.5515	2.82353
	11	5.3592	4.00909	3.5518	3.13304	2.16274	2.14592	1.66316	1.24109	0.948347	0.749482	0.801653	0.879418	1.85474	2.15254	2.37687	2.61987	2.77729
	12	3.02998	4.31486	3.18805	3.48894	2.14751	1.66311	1.42767	1.05625	0.88843	0.519588	0.46281	0.887029	1.75105	2.24416	2.54741	2.72391	2.93873
	13	2.40213	2.99564	2.88079	2.59477	1.85097	1.32909	1.29498	1.1625	0.623967	0.313402	0.447205	0.871636	1.50837	2.5	2.83007	2.98906	3.13537
	14		1.86013	2.09382	1.93089	1.39316	1.06513	1.04792	1.0499	0.603306	0.3107	0.594203	1.147	1.60543	2.67387	3.07237	3.12445
	15			1.3382	1.43856	0.981013	0.80167	0.925156	1.24792	1.0499	0.892116	1.36798	1.72594	2.31838
	16				0.956432	0.901468	0.90249	1.06458	1.26819	1.60924	2.10359	2.2516
	17					1.42706	1.59785	1.82906	2.08405	2.45969
5	1					2.34228	2.19822	2.15145	1.97357	1.86344	1.76419	1.75817	1.79258	1.83043					5																		5
	2					2.14222	2.01774	1.98448	1.92105	1.81699	1.64706	1.67826	1.75435	1.75054	1.85526
	3			2.25109	1.98455	1.82628	1.7146	1.88496	1.97374	1.79913	1.59002	1.50324	1.58963	1.68387	1.72331	1.80392
	4		2.17308	1.25482	1.42888	1.4978	0.47046	1.35435	0.982684	1.26767	1.34409	1.25636	1.25159	1.27696	1.42184	1.77489	1.9281
	5	2.55696	1.19287	0.745182	1.57965	1.19205	0.649123	1.08913	0.522581	0.352442	1.00636	0.963983	0.857143	0.805907	1.08936	1.49462	1.88696	2.11111
	6	1.89562	1.19409	2.0524	2.34076	1.45934	1.09586	1.33987	2.02851	1.11653	0.345992	0.469602	0.66318	0.584034	1.00422	1.41113	1.96061	2.26696
	7	2.26866	2.06926	1.70897	1.19956	1.82119	1.10129	0.760171	1.52146	1.39066	0.523109	0.294606	0.352201	0.177824	0.663158	1.27061	2.20961	2.48559
	8	3.97797	2.39189	1.80795	1.99341	0.511677	1.03441	1.26282	1.09874	1.44444	0.480084	0.682672	0.487448	0.54071	0.746835	1.70127	2.38178	2.69027
	9	4.52232	5.33333	4.37445	2.03441	0.635789	0.192469	1.23207	1.37553	1.4034	0.909278	0.920668	0.853862	1.27406	1.87234	2.20085	2.61656	2.78319
	10	3.92394	3.96205	3.86976	2.6129	1.73036	1.4661	1.64482	1.57053	1.25684	0.911885	1	1.10417	1.8159	2.15678	2.28602	2.50431	2.72807
	11	4.78587	3.73138	3.29011	2.99344	2.18376	2.08511	1.66247	1.32983	1.10124	0.742331	0.921971	0.962887	1.86013	2.15433	2.40725	2.61605	2.76688
	12	3.00877	3.96637	3.12081	3.32237	2.2603	1.77419	1.45551	1.19247	1.02053	0.630612	0.540041	0.952577	1.73181	2.23517	2.54506	2.72926	2.85683
	13	2.3682	2.9607	2.85969	2.74614	2.01502	1.62741	1.40292	1.3354	0.751527	0.400818	0.516393	0.95501	1.59588	2.4661	2.75108	2.91145	2.99127
	14		1.91213	2.16094	2.04487	1.58422	1.21639	1.19415	1.2029	0.741803	0.412731	0.627812	1.10883	1.76763	2.67019	3.05	3.08515
	15			1.30126	1.4071	1.07692	0.876543	0.995885	1.34156	2.61203	0.922131	1.37372	1.79132	2.45877
	16				0.892784	0.923554	0.966736	1.09917	1.41494	1.71042	2.159	2.3501
	17					1.44979	1.73729	1.97425	2.27371	2.47516
6	1					2.42601	2.25618	2.22371	2.09272	1.85526	1.78022	1.73407	1.65044	1.73789					6																		6
	2					2.21205	2.06027	2.02232	2.09051	1.82637	1.65502	1.69365	1.68943	1.64912	1.70065
	3			2.27015	1.92157	1.98891	1.75166	2.01109	2.08647	1.85	1.69063	1.53712	1.50545	1.55844	1.63362	1.69397
	4		2.29526	1.32688	1.52339	1.56071	0.475877	1.46154	1.1056	1.36596	1.32495	1.20842	1.23941	1.31478	1.38544	1.61159	1.79266
	5	2.5572	1.21231	0.782135	1.62611	1.3592	0.630769	1.01307	0.385281	0.448203	0.922756	0.820459	0.811715	0.795789	1.0148	1.38925	1.71767	2.08497
	6	1.86164	1.17548	2.12035	2.4235	1.2949	1.02845	1.2321	2.00649	1.15579	0.294363	0.386221	0.577083	0.54717	0.953191	1.31489	1.77056	2.08114
	7	2.48517	2.17419	1.52308	1.14286	1.83553	1.05882	0.741379	1.51812	1.46414	0.427975	0.340292	0.244259	0.1174	0.612632	1.17759	1.8953	2.29412
	8	4.36142	2.58409	1.89602	1.85153	0.518201	1.13734	1.33333	0.987342	1.40421	0.369835	0.60499	0.422917	0.351579	0.805439	1.58316	2.15484	2.50218
	9	4.51893	5.74886	4.4115	2.01302	0.755319	0.232218	1.38365	1.33827	1.31447	0.805383	0.804979	0.805383	1.09874	1.73617	1.99358	2.33619	2.53595
	10	4.0067	4.51382	4.10586	2.67699	1.8	1.46234	1.73305	1.54255	1.12317	0.792608	0.919255	1.04752	1.66038	2.03814	2.17021	2.34764	2.56061
	11	4.98438	3.99538	3.59184	3.04425	2.18143	2.24359	1.61053	1.28452	0.997912	0.763374	0.857732	0.979296	1.75681	2.08211	2.26383	2.48172	2.58134
	12	2.9871	4.05393	3.24385	3.35033	2.33766	1.75899	1.46541	1.12917	0.962963	0.588477	0.458848	0.970954	1.70564	2.17511	2.43991	2.6043	2.67672
	13	2.26737	2.90948	2.82533	2.92239	2.02141	1.46526	1.33888	1.28898	0.713115	0.284536	0.457732	0.892562	1.5343	2.3121	2.69313	2.80388	2.92157
	14		1.89562	2.13617	2.103	1.62815	1.2563	1.23077	1.20497	0.63299	0.4	0.62268	1.17526	1.74174	2.55932	2.83188	2.95385
	15			1.3278	1.45303	1.12292	0.896266	1.03125	1.29106	1.21443	0.920833	1.37603	1.80372	2.31866
	16				0.903491	0.912863	0.952381	1.2113	1.47182	1.79375	2.15126	2.27789
	17					1.3692	1.65106	1.92979	2.19058	2.42026
7	1					2.27964	2.19016	2.01559	1.84956	1.73465	1.71366	1.71586	1.76652	1.8					7																		7
	2					2.23438	1.98886	1.86192	1.89579	1.78289	1.67401	1.63736	1.67991	1.71586	1.83814
	3			2.14097	1.869	2.02004	1.66004	1.90265	1.96035	1.81857	1.70996	1.55556	1.64474	1.70678	1.77632	1.78993
	4		2.12903	1.24891	1.32444	1.48889	0.561947	1.44737	0.96732	1.39056	1.23667	1.25532	1.36306	1.43413	1.52381	1.72707	1.95385
	5	2.49041	1.27253	0.747277	1.59071	1.14856	0.58	1.01532	0.402151	0.309168	0.882729	0.943038	0.844864	0.846316	1.22629	1.52941	1.89934	2.21366
	6	1.84989	1.17559	1.89934	2.27212	1.28889	0.986726	1.17391	1.8872	0.929185	0.348936	0.506276	0.587002	0.628151	1.16702	1.4488	1.97582	2.19778
	7	2.38578	2.00439	1.54305	1.10817	1.55679	1.0022	0.727669	1.33475	1.20043	0.549683	0.379455	0.380252	0.180672	0.726115	1.35269	2.24609	2.47204
	8	4.06278	2.52252	1.94395	1.92035	0.481641	1.05459	1.29783	0.961702	1.23941	0.355649	0.667364	0.544885	0.501057	0.889597	1.68737	2.42035	2.61883
	9	4.4482	5.32265	4.26009	1.98018	0.687898	0.152542	1.24468	1.19027	1.11482	0.644628	0.809917	0.952183	1.33824	1.84154	2.20779	2.56347	2.62613
	10	4.06502	4	3.88662	2.5708	1.72863	1.50424	1.59244	1.463	1.07069	0.75	0.942268	1.21739	1.79874	2.02985	2.2381	2.50985	2.69128
	11	4.74607	3.85616	3.27664	2.97333	2.15983	2.00427	1.675	1.23529	0.920833	0.663223	0.842536	1.01653	1.79289	2.10426	2.28387	2.55799	2.71778
	12	2.79783	3.68623	2.87444	3.20179	2.13072	1.63502	1.30146	1.01883	0.803719	0.513292	0.510246	0.969199	1.73181	2.18354	2.43844	2.59913	2.78587
	13	2.29424	2.75385	2.76009	2.58022	1.88362	1.42797	1.18351	1.05533	0.596311	0.249489	0.479508	0.856557	1.55258	2.44515	2.76754	2.87473	3.03371
	14		1.80335	2.07991	1.86266	1.41826	1.03564	1.03727	0.942505	0.591837	0.334694	0.644898	1.14579	1.74689	2.56263	2.92205	2.90402
	15			1.35551	1.32919	0.865145	0.739669	0.848861	1.17623	1.02058	0.916155	1.44262	1.80412	2.39362
	16				0.86653	0.812371	0.844075	1.07676	1.24481	1.59044	2.19706	2.34672
	17					1.38784	1.76709	1.95957	2.17609	2.49007
8	1					2.38652	2.37584	2.34076	2.04	1.93407	1.88079	1.72429	1.81838	1.86283					8																		8
	2					2.23043	2.07589	2.15367	2.0708	1.92779	1.89107	1.70217	1.75764	1.81978	1.90789
	3			2.18398	1.86364	1.96667	1.60667	2.04646	2.13024	1.95652	1.71957	1.67532	1.66594	1.75764	1.75599	1.92795
	4		2.19099	1.2203	1.20485	1.58537	0.410088	1.29605	0.899782	1.37229	1.36481	1.2931	1.35118	1.34698	1.36695	1.67603	2
	5	2.43368	1.26695	0.712418	1.60659	1.31416	0.514223	0.997807	0.347072	0.278618	1.03441	0.927195	0.816631	0.745726	1.06838	1.52361	1.81857	2.12009
	6	1.84322	1.15565	1.74342	2.09978	1.37832	0.967105	1.11404	1.88646	1.09935	0.347458	0.421277	0.541578	0.511727	0.882479	1.30193	1.84881	2.22391
	7	2.34047	1.93464	1.47672	0.951327	1.68071	0.923581	0.549784	1.14957	1.3828	0.472458	0.33758	0.30064	0.125	0.573248	1.1047	2.01512	2.31798
	8	4.14607	2.49431	1.60356	1.72527	0.415948	0.868817	1.07974	0.82516	1.22766	0.415254	0.721868	0.477707	0.322034	0.683761	1.44968	2.11472	2.55263
	9	4.65831	5.45578	4.04867	1.71957	0.625268	0.130342	1.09636	1.1	1.19362	0.738947	0.841772	0.785106	1.07889	1.75589	2	2.29654	2.61304
	10	4.15766	4.17713	3.68791	2.26957	1.53763	1.32128	1.4778	1.33053	1.03171	0.802521	0.867647	1.11229	1.73673	1.99358	2.10129	2.38913	2.56674
	11	4.85088	3.90991	3.33333	3.06608	2.15565	1.94043	1.46429	1.20211	0.922594	0.757829	0.899371	0.943158	1.79193	2.11966	2.20386	2.45356	2.63895
	12	3.06087	4.32584	3.19027	3.45652	2.16205	1.66878	1.43158	1.17684	0.954071	0.527083	0.496868	0.957717	1.75319	2.16453	2.40173	2.56427	2.79956
	13	2.48504	2.90769	2.88616	2.72149	1.96375	1.51055	1.30672	1.32211	0.70625	0.358333	0.488518	0.920668	1.49895	2.27991	2.65284	2.82969	2.98901
	14		1.80842	1.95319	2.05342	1.54123	1.15756	1.19456	1.19497	0.683333	0.413361	0.726514	1.17191	1.60714	2.46667	2.86564	2.91228
	15			1.29938	1.52966	1.09705	0.863732	1.02521	1.27044	1.76261	0.880503	1.33684	1.83333	2.34409
	16				0.869565	0.901674	0.89916	1.11653	1.40254	1.7484	2.08917	2.28387
	17					1.26195	1.57296	1.87284	2.04526	2.35808
9	1					2.27692	2.16703	2.02649	1.76044	1.62857	1.63696	1.56926	1.6413	1.6841					9																		9
	2					2.10769	1.89231	1.79121	1.64693	1.62391	1.54212	1.49676	1.56616	1.6833	1.72885
	3			2.2306	1.82721	1.71648	1.52412	1.82096	1.84026	1.59395	1.47414	1.36933	1.47939	1.58913	1.66811	1.75758
	4		2.20382	1.19272	1.17544	1.51542	0.432314	1.32096	0.94577	1.2382	1.24788	1.09958	1.16348	1.30388	1.43871	1.67387	1.87013
	5	2.46429	1.15612	0.706897	1.51204	1.15894	0.533917	1.00871	0.346237	0.275053	0.927966	0.817227	0.802105	0.810638	1.09636	1.53664	1.79482	2.02165
	6	1.8476	1.14768	1.94156	2.25658	1.34437	0.940919	1.21861	1.85622	0.970464	0.396624	0.442348	0.587866	0.554852	1.02335	1.35345	1.88312	2.17211
	7	2.19068	2.03017	1.47368	1.15708	1.64615	0.928105	0.642241	1.35106	1.26907	0.493644	0.333333	0.26096	0.154812	0.682875	1.11064	2.09307	2.37199
	8	4.10989	2.33557	1.73187	1.83261	0.497872	0.941685	1.16164	0.96822	1.39619	0.336134	0.668058	0.398747	0.404211	0.752119	1.60128	2.26724	2.52851
	9	4.56984	5.22422	4.14922	1.75378	0.731915	0.141053	1.21674	1.35319	1.28302	0.665971	0.800416	0.75523	1.13445	1.81277	2.10043	2.44181	2.7
	10	4.02009	4.07539	3.86667	2.45905	1.67811	1.42495	1.61522	1.53053	1.10251	0.73913	0.869295	1.02075	1.65553	2.00213	2.15171	2.47072	2.73362
	11	4.91266	3.80624	3.4343	3.14912	2.25806	2.14468	1.67017	1.25157	0.993763	0.682474	0.797938	0.971074	1.82292	2.10169	2.24197	2.4818	2.72451
	12	2.98291	4.16968	3.04867	3.31808	2.23441	1.76059	1.44211	1.19706	0.940206	0.489712	0.476386	0.917012	1.72083	2.19078	2.42979	2.56774	2.78308
	13	2.27197	2.9755	2.86404	2.69697	1.91026	1.51374	1.32432	1.22153	0.627049	0.273663	0.507187	0.878351	1.47808	2.28632	2.64807	2.84698	2.91921
	14		1.92453	2.13983	2.00855	1.51168	1.07741	1.15114	1.02464	0.635802	0.337449	0.597938	1.15464	1.63257	2.52532	2.88793	2.96247
	15			1.34096	1.42017	0.997925	0.744813	0.871369	1.20539	1.03306	0.925156	1.40702	1.8278	2.34043
	16				0.906832	0.860996	0.879418	1.01452	1.3682	1.63445	2.10759	2.37053
	17					1.30962	1.61017	1.86296	2.17495	2.329
10	1					2.47345	2.46	2.1808	1.95604	1.86026	1.76471	1.72767	1.76304	1.85808					10																		10
	2					2.26667	2.15145	1.98658	1.90393	1.79956	1.64859	1.65227	1.70588	1.80217	1.86623
	3			2.15778	1.92157	1.82781	1.75556	2.03761	2.01978	1.89565	1.72944	1.60304	1.62826	1.75325	1.72294	1.83696
	4		1.91121	1.13859	1.40879	1.46341	0.52954	1.39387	0.961039	1.36809	1.51502	1.39873	1.35169	1.36674	1.42918	1.69197	1.97174
	5	2.39195	1.06513	0.630342	1.60927	1.1557	0.59081	0.969499	0.387931	0.372093	1.07219	0.917548	0.874468	0.827004	1.12979	1.52586	1.89588	2.16122
	6	1.88889	1.14013	1.85621	2.20044	1.29956	0.930586	1.27391	1.9	1.15042	0.322785	0.395789	0.606316	0.546973	0.966387	1.28936	1.91886	2.26144
	7	2.34255	1.9632	1.51974	1.09692	1.65275	1.04357	0.780911	1.39407	1.46667	0.483122	0.291405	0.306723	0.168067	0.689873	1.21581	2.04752	2.47241
	8	4.01532	2.4819	1.81556	1.87033	0.512821	1.07792	1.2987	1.01677	1.4359	0.413866	0.675732	0.403326	0.430063	0.721519	1.63889	2.29247	2.65854
	9	4.33038	5.36465	4.19556	1.86492	0.736617	0.247881	1.28238	1.37155	1.43432	0.904167	0.960581	0.81761	1.13108	1.72824	1.99574	2.49675	2.74393
	10	3.67912	4.098	4.20179	2.68122	1.78112	1.47134	1.75941	1.56813	1.30417	0.931818	1.00622	1.07277	1.68828	1.97881	2.11864	2.473	2.70306
	11	4.78139	3.74723	3.70362	3.25721	2.33043	2.25536	1.8142	1.35537	1.12317	0.801636	0.993802	1.01035	1.82143	2.12821	2.29274	2.48602	2.72489
	12	3.00853	4.01969	3.13626	3.71491	2.31887	1.77825	1.55833	1.31315	1.03099	0.644898	0.523614	1.03326	1.73739	2.24468	2.45259	2.70217	2.84026
	13	2.24109	2.72473	2.83297	2.73742	1.87768	1.53404	1.33474	1.45114	0.72541	0.425051	0.599182	1.07202	1.68058	2.4968	2.81345	2.9081	2.88403
	14		1.79289	2.07312	2.05996	1.57895	1.21895	1.28092	1.325	0.791753	0.429158	0.688525	1.26694	1.80124	2.67024	2.94934	2.87033
	15			1.26819	1.34864	1.03758	0.862213	1.01247	1.35908	1.00417	0.952083	1.44008	1.89813	2.49893
	16				0.900208	0.950207	0.96281	1.22199	1.50837	1.8159	2.1234	2.33051
	17					1.25052	1.58333	1.82303	2.15565	2.40598

## Sheet: CV
MeanVelocity
Signals of insufficient quality were excluded from the property maps. Signals could be rejected based on noise low amplitude, large artefact or ventricluar farfields that could not be substracted.
		1	2	3	4	5	6	7	8	9	10	11	12	13	14	15	16	17
1	1					1.81851	2.06873	2.11341	2.26837	2.65243	3.23127	3.44161	3.54696	3.50406					1																		1
	2					1.48066	1.61455	1.65661	1.68586	1.95558	2.31386	2.62201	2.73982	2.77451	3.04524
	3			1.00507	0.990933	1.06894	1.17612	1.19174	1.18917	1.37523	1.56121	1.95745	2.27636	2.50671	2.90559	3.48651
	4		0.903941	0.822967	0.822539	0.889121	0.855049	0.813814	0.821765	0.93561	1.09357	1.3459	1.67575	1.74759	2.48141	3.34149	3.54641
	5	0.897603	0.805014	0.791847	0.783653	0.817813	0.765123	0.766854	0.723748	0.782783	0.90875	1.0619	1.20716	1.3532	1.85476	2.72272	3.07125	2.99476
	6	0.805991	0.783936	0.759962	0.742029	0.840009	0.7575	0.75126	0.741266	0.71764	0.77313	0.873934	0.937122	1.10627	1.54104	2.04383	2.4836	2.47411
	7	0.770052	0.731182	0.736025	0.687243	0.772267	0.724845	0.736123	0.705561	0.661507	0.689876	0.749941	0.807215	0.93538	1.19394	1.56574	1.89484	1.95665
	8	0.931969	0.804904	0.813796	0.751247	0.738884	0.731381	0.707354	0.648629	0.648347	0.653019	0.702064	0.764345	0.882129	1.12511	1.41793	1.75084	1.87988
	9	1.37001	1.30156	1.23049	0.989952	0.836857	0.722415	0.66527	0.634829	0.632449	0.632255	0.682085	0.799137	0.995642	1.30678	1.64427	1.9552	1.91967
	10	1.51106	1.56507	1.34407	1.23856	0.914976	0.731111	0.694179	0.652537	0.67677	0.667757	0.68566	0.814004	1.01612	1.54612	2.14446	2.49613	2.47503
	11	1.53011	1.67648	1.53287	1.42138	1.09065	0.936703	0.717026	0.69362	0.703592	0.746804	0.757569	0.860666	1.12917	1.68076	2.234	2.64032	3.27519
	12	1.33492	1.47	1.39937	1.37869	1.19207	1.02622	0.780508	0.748057	0.732219	0.770651	0.827202	0.965312	1.20465	1.71492	2.12375	2.51805	2.98944
	13	1.20328	1.31485	1.33313	1.38156	1.1135	0.928563	0.762023	0.691799	0.710843	0.753467	0.905434	1.09287	1.26041	1.60574	1.98586	2.30283	2.66961
	14		1.18031	1.16652	1.23412	1.14366	0.923145	0.754864	0.725651	0.706644	0.786166	0.934225	1.18146	1.49422	1.60681	1.82058	1.97107
	15			0.994566	1.03894	1.00218	0.971642	0.804615	0.74271	0.758921	0.808446	0.985871	1.25782	1.79904
	16				0.964509	1.07434	0.991243	0.838892	0.76523	0.743377	0.809501	0.986273
	17					0.980841	0.988038	0.855978	0.763566	0.739095
2	1					1.75737	1.8932	1.98893	2.14626	2.53102	3.08828	3.33122	3.45005	3.39458					2																		2
	2					1.40606	1.53185	1.53852	1.67491	1.84162	2.18492	2.50899	2.64675	2.84441	3.02108
	3			1.1711	1.06964	1.0203	1.1145	1.15542	1.26242	1.40476	1.70011	1.91699	2.2055	2.52782	2.85841	3.61592
	4		0.954811	0.867811	0.809904	0.92001	0.906695	0.910765	0.876649	0.984799	1.11397	1.28672	1.53874	1.80461	2.44048	3.45665	3.69833
	5	0.916517	0.801917	0.766986	0.756859	0.854535	0.884162	0.804082	0.752032	0.816514	0.894551	0.99305	1.12386	1.32355	1.75592	2.7353	3.21273	3.20977
	6	0.811529	0.809522	0.762692	0.738429	0.86269	0.899511	0.81324	0.750431	0.722337	0.784729	0.86352	0.933066	1.05663	1.51605	1.98444	2.61261	2.66036
	7	0.79152	0.754338	0.676914	0.650636	0.757194	0.792288	0.758641	0.725025	0.695873	0.706756	0.726555	0.769782	0.93535	1.16695	1.42765	2.02125	2.14669
	8	1.03988	0.851267	0.730075	0.706831	0.704552	0.713056	0.737282	0.675504	0.669782	0.654822	0.685773	0.702034	0.822763	1.02544	1.31331	1.68361	1.88046
	9	1.39626	1.42827	1.11789	0.828541	0.722414	0.674056	0.706784	0.671988	0.678571	0.667	0.682957	0.706555	0.873579	1.2422	1.60795	2.06246	2.09148
	10	1.64057	1.59183	1.30759	1.10494	0.908221	0.7983	0.779496	0.708246	0.725929	0.718472	0.685581	0.732624	0.960875	1.46542	1.96751	2.50371	2.767
	11	1.62385	1.71949	1.42725	1.27612	1.11283	0.940336	0.751265	0.777961	0.752691	0.738847	0.748508	0.799959	1.05818	1.59203	2.18513	2.64815	3.266
	12	1.28002	1.44873	1.43619	1.32274	1.11912	0.948013	0.748936	0.713653	0.764303	0.774217	0.811487	0.868439	1.09437	1.54691	2.04535	2.35139	2.76622
	13	1.21228	1.26824	1.36304	1.25225	1.09992	0.938731	0.847526	0.719205	0.730587	0.777591	0.868046	0.998841	1.24383	1.52327	1.91938	2.22701	2.67426
	14		1.12133	1.2949	1.20038	1.06844	0.935022	0.799565	0.775361	0.736911	0.799267	0.928972	1.12198	1.38231	1.63115	1.78986	1.78161
	15			1.10836	1.07769	1.06078	0.991983	0.871138	0.803471	0.770309	0.828293	0.993	1.2099	1.71655
	16				0.989484	1.06457	1.00223	0.866002	0.802363	0.781357	0.821444	0.952635
	17					1.02895	0.992593	0.819049	0.779921	0.821283
3	1					1.8189	1.85404	2.00593	2.11325	2.49575	2.88215	3.12398	3.16263	3.15416					3																		3
	2					1.44033	1.48621	1.52502	1.60191	1.87046	2.21164	2.38828	2.40945	2.5309	2.92638
	3			1.00753	1.02011	1.12804	1.08397	1.11167	1.14003	1.33928	1.55926	1.84541	2.06646	2.36747	2.70757	3.35282
	4		0.812612	0.804962	0.81189	0.864938	0.833331	0.868382	0.817891	0.933573	1.10189	1.29781	1.44895	1.79886	2.2348	3.15645	3.32718
	5	0.791054	0.764997	0.731235	0.750934	0.817457	0.821509	0.81034	0.744952	0.757869	0.882399	1.04226	1.16634	1.3259	1.74457	2.46918	2.90126	2.863
	6	0.724366	0.701559	0.68251	0.752476	0.855789	0.831327	0.843452	0.739025	0.712195	0.820232	0.921897	0.987505	1.11694	1.37236	1.95027	2.55722	2.52882
	7	0.735137	0.743076	0.72731	0.703972	0.827933	0.839352	0.825079	0.701768	0.702453	0.753616	0.786494	0.828122	0.937121	1.14579	1.484	2.15605	2.22131
	8	0.967758	0.889961	0.828973	0.775215	0.7577	0.746402	0.768968	0.659123	0.650403	0.69471	0.730429	0.766844	0.859457	1.07044	1.43815	1.76654	1.94473
	9	1.39223	1.38574	1.14042	0.901349	0.800227	0.717031	0.739146	0.673433	0.676354	0.69847	0.726373	0.773937	0.923569	1.27089	1.62229	2.03086	2.19994
	10	1.49832	1.59277	1.33121	1.10972	0.901986	0.755038	0.72038	0.694866	0.776915	0.727076	0.761017	0.87394	1.03218	1.52344	2.03459	2.69304	2.71282
	11	1.61067	1.58908	1.38773	1.2792	1.01643	0.854001	0.705995	0.724431	0.757434	0.791616	0.801273	0.902314	1.07705	1.59143	2.41352	2.92735	3.36731
	12	1.31442	1.33288	1.36252	1.18102	0.998209	0.814577	0.716924	0.705779	0.706774	0.751839	0.817006	0.938005	1.169	1.66468	2.17749	2.5234	2.93599
	13	1.15011	1.28247	1.17561	1.13035	0.999337	0.891439	0.750163	0.678472	0.721455	0.772373	0.874344	1.04347	1.32361	1.66522	2.0733	2.46697	2.57338
	14		1.0625	1.09609	1.09084	0.984922	0.856973	0.792512	0.749518	0.733143	0.809024	0.911326	1.09443	1.42893	1.71795	1.89796	2.03982
	15			0.993989	0.991092	0.975006	0.920915	0.839827	0.768617	0.778956	0.812183	1.00065	1.23443	1.77359
	16				0.944096	1.00091	0.92578	0.831763	0.735617	0.784726	0.839961	0.960391
	17					0.960814	0.928489	0.828089	0.737585	0.802211
4	1					1.71627	1.86149	1.95519	2.06519	2.47139	2.93865	3.15172	3.33876	3.52286					4																		4
	2					1.50428	1.5101	1.61922	1.69958	1.82682	2.16319	2.31978	2.6137	2.86428	3.25583
	3			0.970182	0.959383	1.06395	1.1354	1.21669	1.26371	1.38069	1.7116	1.88394	2.21414	2.49173	3.02356	3.48231
	4		0.823848	0.79251	0.796897	0.868085	0.879037	0.917633	0.851908	0.956219	1.17934	1.36476	1.64708	1.81112	2.40585	3.31147	3.44585
	5	0.849065	0.772949	0.716567	0.743765	0.776294	0.814817	0.803063	0.785045	0.827672	0.913721	1.0329	1.19997	1.38961	1.87302	2.62432	2.89978	2.94893
	6	0.778055	0.746423	0.731225	0.713094	0.786926	0.818748	0.772479	0.761804	0.754007	0.81367	0.882862	0.977028	1.13734	1.48014	1.97059	2.38461	2.37933
	7	0.743711	0.696894	0.741393	0.681416	0.78654	0.706846	0.756923	0.710967	0.71713	0.722222	0.762358	0.841697	0.954268	1.19132	1.45124	1.95127	2.06126
	8	0.923678	0.90751	0.790762	0.723068	0.676723	0.652253	0.703896	0.668481	0.669613	0.660948	0.691908	0.776033	0.882035	1.04002	1.25559	1.51573	1.7218
	9	1.28536	1.33347	1.16529	0.812135	0.717198	0.668034	0.679902	0.650917	0.646468	0.674281	0.706001	0.78213	0.959804	1.24501	1.54279	1.77785	1.99856
	10	1.48501	1.50162	1.40786	1.2329	0.832357	0.759545	0.688571	0.677636	0.640468	0.703962	0.72145	0.793246	0.99342	1.43386	1.98651	2.4972	2.74679
	11	1.62779	1.63862	1.54242	1.30186	1.07635	0.860373	0.677062	0.634814	0.712389	0.726777	0.739672	0.865817	1.14631	1.6786	2.24552	2.79458	3.45701
	12	1.14214	1.55544	1.39999	1.33549	1.1722	0.979967	0.690213	0.65368	0.688578	0.714726	0.771998	0.895698	1.26361	1.76971	2.12482	2.49608	3.05932
	13	1.07832	1.26244	1.26396	1.18321	1.0789	0.866805	0.698371	0.690633	0.652839	0.720704	0.83639	1.01414	1.24964	1.65961	1.89346	2.22825	2.68397
	14		1.01326	1.17834	1.07313	1.03476	0.842944	0.770998	0.707773	0.692766	0.760984	0.950079	1.14308	1.411	1.62338	1.76196	1.99694
	15			0.923602	0.991743	0.963574	0.899127	0.783587	0.74618	0.73967	0.7852	0.992373	1.24242	1.76776
	16				0.948743	1.05657	0.932627	0.838807	0.747287	0.744234	0.79152	0.947194
	17					0.995486	1.01289	0.826137	0.723459	0.718198
5	1					1.6727	1.77082	1.84061	2.22739	2.56156	2.82378	3.09703	3.28308	3.41899					5																		5
	2					1.32576	1.44256	1.61449	1.6473	1.88902	2.15375	2.43	2.6935	2.877	3.28422
	3			0.887023	0.981752	1.04839	1.09692	1.1851	1.26168	1.48649	1.72976	2.0236	2.28982	2.4505	3.04852	3.62256
	4		0.851327	0.7755	0.777109	0.816496	0.856896	0.857399	0.817964	1.01514	1.2317	1.33347	1.62918	1.91605	2.66031	3.59398	3.55369
	5	0.79103	0.732409	0.663513	0.71793	0.761391	0.799452	0.830101	0.758437	0.838057	0.966367	1.06605	1.20943	1.46659	1.93526	2.76602	2.88517	2.77273
	6	0.773713	0.761376	0.691694	0.699836	0.792775	0.900499	0.895141	0.798526	0.788328	0.838449	0.879466	0.950221	1.13867	1.59687	2.08883	2.51077	2.4565
	7	0.742973	0.689765	0.657083	0.670512	0.790653	0.846395	0.783402	0.732892	0.723074	0.718759	0.766415	0.796844	0.959068	1.27459	1.60687	1.97957	2.02371
	8	0.897618	0.845957	0.758728	0.729577	0.680892	0.712876	0.768266	0.666001	0.655986	0.65913	0.686208	0.780573	0.919138	1.10882	1.44644	1.75601	1.87842
	9	1.29167	1.24581	1.08861	0.812701	0.738213	0.732565	0.719455	0.696233	0.679365	0.678102	0.683645	0.742678	0.966492	1.40075	1.65482	1.97893	2.0584
	10	1.42466	1.60595	1.31959	1.11432	0.941766	0.833433	0.803646	0.724363	0.749965	0.66894	0.744217	0.829115	1.07782	1.61664	2.17231	2.51424	2.68589
	11	1.66257	1.72352	1.48323	1.3391	1.08925	0.945197	0.78262	0.717287	0.718977	0.735268	0.763939	0.874327	1.14564	1.82676	2.33561	2.88672	3.1106
	12	1.32799	1.54861	1.53305	1.45352	1.21043	0.971482	0.871202	0.742299	0.713109	0.743477	0.800622	0.924686	1.25674	1.80548	2.29621	2.6319	3.0358
	13	1.15748	1.33322	1.43409	1.38919	1.19243	0.959473	0.755619	0.707502	0.690273	0.75493	0.858011	1.01858	1.27443	1.74268	2.13392	2.3815	2.74583
	14		1.12102	1.23943	1.203	1.08792	0.925296	0.760495	0.717206	0.698822	0.755125	0.902919	1.11957	1.46976	1.70354	1.96199	1.97217
	15			1.02817	1.10513	1.00229	0.924364	0.792571	0.724839	0.732005	0.765251	0.992454	1.27051	1.83215
	16				1.01706	1.03932	0.922915	0.766913	0.714334	0.711745	0.792697	0.973609
	17					1.00884	0.923106	0.77197	0.732063	0.738994
6	1					1.5356	1.60948	1.87419	2.0763	2.48492	3.08294	3.44241	3.41398	3.37468					6																		6
	2					1.25102	1.31837	1.38526	1.50653	1.80589	2.20023	2.47575	2.61643	2.67105	3.03754
	3			1.00858	0.967834	0.984196	0.968193	1.05098	1.06992	1.40476	1.65999	1.86862	2.21453	2.3897	2.97514	3.53754
	4		0.818433	0.794278	0.808071	0.845849	0.75229	0.801857	0.81699	0.904631	1.13224	1.26749	1.59722	1.90519	2.59753	3.39621	3.54194
	5	0.807788	0.708995	0.706579	0.709262	0.843394	0.796783	0.740661	0.703269	0.78556	0.917914	1.05239	1.16158	1.46469	1.88534	2.69552	3.03268	3.02175
	6	0.763765	0.708472	0.728438	0.706088	0.789485	0.820881	0.749471	0.69142	0.735436	0.83582	0.869152	0.936614	1.1037	1.60157	2.00383	2.45042	2.51418
	7	0.731414	0.683371	0.669213	0.672622	0.771943	0.807406	0.763822	0.684333	0.72479	0.716823	0.728378	0.803833	0.938975	1.19902	1.52649	1.99546	1.99769
	8	0.865428	0.809319	0.798706	0.772415	0.74911	0.76412	0.759018	0.665535	0.65798	0.66453	0.674977	0.752681	0.87222	1.10163	1.4071	1.72651	1.82549
	9	1.39059	1.36594	1.25597	0.956693	0.833307	0.704546	0.712465	0.67296	0.69403	0.659325	0.694	0.781425	0.949954	1.31903	1.73261	1.95882	2.09509
	10	1.47276	1.55345	1.3792	1.15875	0.90786	0.77645	0.716293	0.6553	0.666685	0.694482	0.73779	0.836079	1.07797	1.51215	2.0579	2.43667	2.4781
	11	1.75374	1.66145	1.64062	1.41748	1.11899	0.892529	0.717668	0.680527	0.71696	0.737797	0.756743	0.909189	1.22485	1.75929	2.3826	2.85085	3.21824
	12	1.3107	1.50589	1.56646	1.39786	1.17807	0.908977	0.747509	0.694363	0.720364	0.751046	0.842707	0.993753	1.30868	1.74228	2.20641	2.6438	2.81222
	13	1.11451	1.25879	1.30106	1.27313	1.04947	0.874568	0.736013	0.698928	0.715892	0.753594	0.895667	1.10839	1.32883	1.67439	2.08127	2.47264	2.55327
	14		1.07856	1.10704	1.03538	0.994718	0.837178	0.782726	0.70708	0.726635	0.795171	0.958635	1.16359	1.47665	1.70146	1.89438	2.06789
	15			0.919695	1.01534	0.963191	0.865878	0.802427	0.740648	0.739797	0.817906	1.02196	1.26756	1.84152
	16				0.930959	0.952885	0.884736	0.779612	0.728909	0.791561	0.881461	1.01778
	17					0.975385	0.952433	0.800088	0.779211	0.803335
7	1					1.56195	1.63181	1.73005	1.89271	2.40006	2.9152	3.31856	3.17829	3.32205					7																		7
	2					1.34329	1.36567	1.43634	1.52702	1.91315	2.21947	2.45367	2.66576	2.74235	3.07905
	3			0.998516	1.00289	1.12945	1.0798	1.04126	1.13915	1.43397	1.72929	1.94186	2.28203	2.48584	2.82719	3.40531
	4		0.854104	0.823154	0.87042	0.9522	0.870602	0.897248	0.834644	0.952403	1.15051	1.30546	1.57335	1.92727	2.57148	3.29959	3.50431
	5	0.87082	0.851364	0.740445	0.806643	0.859572	0.845876	0.808164	0.739591	0.813279	0.920993	1.0448	1.17808	1.32504	1.7852	2.6993	2.92713	2.83249
	6	0.796648	0.750429	0.719538	0.763416	0.807705	0.911676	0.803763	0.73644	0.729481	0.826666	0.866703	0.935085	1.06314	1.4536	2.10533	2.43808	2.40936
	7	0.800366	0.802621	0.761112	0.731018	0.831745	0.814797	0.782137	0.708093	0.738914	0.732219	0.737597	0.802003	0.921249	1.16747	1.54286	1.93978	1.90934
	8	0.978324	0.901292	0.870866	0.754077	0.724367	0.774959	0.71043	0.67288	0.679776	0.676949	0.683382	0.750643	0.872307	1.10467	1.32908	1.65672	1.7129
	9	1.27681	1.28693	1.16457	0.970048	0.791269	0.730219	0.680695	0.669938	0.676359	0.681229	0.670157	0.760811	0.985848	1.28211	1.6662	1.95572	1.94274
	10	1.4638	1.5301	1.47026	1.28708	0.89873	0.773818	0.682646	0.673947	0.678423	0.679528	0.698495	0.765933	1.08888	1.628	2.12637	2.33288	2.39053
	11	1.52921	1.58546	1.60063	1.49194	1.11979	0.917923	0.717708	0.700284	0.713567	0.759122	0.784829	0.880261	1.2146	1.7285	2.27128	2.86577	3.03464
	12	1.36455	1.52002	1.48376	1.38629	1.11916	0.951227	0.720029	0.663577	0.68342	0.736596	0.788826	0.968731	1.27731	1.69814	2.08602	2.37042	2.92615
	13	1.25046	1.42578	1.40791	1.24911	1.05823	0.904848	0.683562	0.664276	0.691105	0.746406	0.872788	1.08491	1.43346	1.63916	1.88507	2.14055	2.39502
	14		1.10159	1.15205	1.12083	0.997769	0.801691	0.728763	0.688125	0.708911	0.785409	0.926065	1.13268	1.46228	1.61474	1.74763	1.87807
	15			1.01433	1.02804	1.01795	0.885817	0.794863	0.749932	0.767223	0.806173	0.994365	1.21293	1.73136
	16				0.962248	0.972682	0.973962	0.779539	0.760386	0.767834	0.821905	0.91911
	17					0.950706	0.928391	0.800791	0.755572	0.749136
8	1					1.73657	1.63725	1.76919	1.94913	2.25996	2.93737	3.0607	3.1527	3.13915					8																		8
	2					1.51785	1.44758	1.46237	1.47278	1.75247	2.0125	2.20951	2.42459	2.56594	2.95469
	3			0.971632	0.985557	1.08892	1.13898	1.12514	1.13343	1.31547	1.59631	1.70232	2.04729	2.39771	2.84376	3.48108
	4		0.943931	0.879203	0.843047	0.960837	0.931529	0.873838	0.774599	0.914389	1.10403	1.28154	1.43974	1.79531	2.55467	3.39467	3.35821
	5	0.875494	0.830167	0.765294	0.82436	0.916959	0.907837	0.783012	0.710305	0.747603	0.890065	0.986119	1.14698	1.41007	1.88314	2.80819	2.95815	2.97066
	6	0.789284	0.756104	0.754207	0.82562	0.900395	0.948005	0.853159	0.757305	0.708383	0.7359	0.819961	0.929203	1.13286	1.40626	2.06169	2.44257	2.44944
	7	0.763534	0.729891	0.735423	0.726625	0.917347	0.882835	0.862451	0.761978	0.69213	0.676416	0.741133	0.808083	0.948473	1.22331	1.57878	1.99195	2.04579
	8	0.941344	0.863461	0.810921	0.78761	0.80601	0.816793	0.801715	0.673675	0.653295	0.649021	0.687098	0.743876	0.907292	1.11824	1.40366	1.62316	1.66794
	9	1.36236	1.27156	1.10111	0.89721	0.829709	0.814996	0.789264	0.689796	0.701725	0.631478	0.670948	0.7428	0.986421	1.43339	1.81491	1.96544	2.13479
	10	1.41587	1.46897	1.32924	1.06396	0.947041	0.826273	0.808143	0.703018	0.708628	0.652573	0.680329	0.794767	1.03583	1.66268	2.28769	2.6585	2.7178
	11	1.6051	1.58514	1.43247	1.24899	1.10377	0.915447	0.823633	0.683595	0.696367	0.712946	0.74151	0.860949	1.20488	1.7673	2.43928	2.92817	3.55556
	12	1.24823	1.41902	1.3863	1.37267	1.10315	0.93558	0.741929	0.669115	0.697909	0.755832	0.804735	0.976507	1.35109	1.87096	2.26065	2.73709	3.18543
	13	1.10021	1.15012	1.22022	1.2258	1.11541	0.916878	0.759501	0.708849	0.706086	0.753447	0.89026	1.09027	1.36377	1.79145	2.08521	2.44964	2.84834
	14		1.00318	1.17386	1.13361	1.04738	0.914691	0.817795	0.708301	0.717372	0.798505	0.929874	1.17744	1.47731	1.7413	1.88753	2.0823
	15			0.941888	0.98779	1.12932	0.957208	0.834377	0.739068	0.752592	0.787772	0.993661	1.22327	1.75841
	16				0.973954	1.03184	0.942108	0.840001	0.717201	0.796783	0.835773	0.979851
	17					1.01295	0.960856	0.812205	0.731978	0.795684
9	1					1.54339	1.56771	1.73379	1.9685	2.27564	2.76408	3.16284	3.0857	3.15363					9																		9
	2					1.27307	1.33344	1.49477	1.532	1.74987	2.15481	2.32614	2.52329	2.58775	3.01473
	3			0.945777	0.895067	0.99496	1.06977	1.19065	1.18905	1.36144	1.64214	1.81076	2.05103	2.31592	2.64087	3.19461
	4		0.83864	0.830223	0.788268	0.843511	0.84988	0.885464	0.901967	0.975345	1.12426	1.21336	1.53501	1.74536	2.47936	3.28862	3.36723
	5	0.906008	0.84378	0.773262	0.773295	0.807485	0.79254	0.814271	0.763616	0.792142	0.88734	1.00506	1.15981	1.42401	1.85188	2.7618	3.03422	3.11256
	6	0.798039	0.79816	0.803606	0.743865	0.863933	0.863032	0.816789	0.805861	0.745054	0.813415	0.870338	0.927852	1.19322	1.55808	2.11641	2.57403	2.58822
	7	0.750154	0.769854	0.750565	0.742496	0.845065	0.848784	0.834773	0.684667	0.711087	0.735374	0.745817	0.815244	0.994434	1.21338	1.57481	2.01837	2.0721
	8	0.901928	0.835027	0.741573	0.751057	0.782739	0.775024	0.757997	0.637031	0.666583	0.682086	0.693978	0.758297	0.897237	1.09749	1.47833	1.75523	1.87371
	9	1.22168	1.26093	1.02995	0.895296	0.785413	0.700806	0.73662	0.657854	0.637818	0.678632	0.700579	0.836297	0.987852	1.37636	1.77196	1.98329	2.04449
	10	1.39584	1.5579	1.2956	1.07932	0.951775	0.803555	0.775494	0.653082	0.668816	0.663366	0.722646	0.849491	1.11787	1.61254	2.20018	2.40185	2.59985
	11	1.58923	1.60894	1.45657	1.24454	1.07003	0.991098	0.759601	0.688513	0.66989	0.708262	0.736915	0.876653	1.15434	1.74863	2.31775	2.6824	3.22364
	12	1.23672	1.26462	1.15191	1.20597	1.12547	1.04758	0.779613	0.689612	0.661771	0.717097	0.785045	0.980891	1.24377	1.74439	2.21249	2.52007	2.9527
	13	1.07133	1.16868	1.15662	1.16446	1.00013	0.900083	0.73833	0.670754	0.693286	0.750818	0.875637	1.08575	1.35898	1.81018	2.0109	2.38773	2.72828
	14		1.01393	1.0429	1.16309	1.02859	0.864718	0.767282	0.703324	0.70326	0.79222	0.93235	1.16471	1.50092	1.80859	1.8978	2.18293
	15			0.95591	1.01766	0.958262	0.885184	0.821807	0.754001	0.76154	0.841818	0.996084	1.27459	1.87967
	16				0.989515	1.04415	0.942015	0.78909	0.742819	0.745652	0.831021	0.965595
	17					1.03027	0.932312	0.806313	0.744646	0.728815
10	1					1.65571	1.62299	1.81807	2.07309	2.43774	2.98166	3.03423	3.02807	3.22767					10																		10
	2					1.37178	1.34922	1.57131	1.61936	1.83374	2.19603	2.44755	2.50727	2.80099	3.10886
	3			1.03371	1.05791	1.01441	1.06749	1.14968	1.20426	1.46064	1.59389	1.90725	2.17318	2.50782	3.00018	3.43152
	4		0.90109	0.879431	0.848989	0.8557	0.855923	0.854251	0.860744	0.978071	1.21777	1.39019	1.64741	1.84476	2.56543	3.28574	3.28069
	5	0.877568	0.847327	0.801224	0.739063	0.807269	0.827632	0.757747	0.736564	0.764095	0.909699	1.00836	1.18076	1.41362	1.87449	2.64918	2.79972	2.84209
	6	0.792677	0.774006	0.748304	0.716716	0.756271	0.855718	0.7818	0.740651	0.714636	0.787498	0.869969	0.942873	1.1272	1.49256	1.90215	2.23019	2.34479
	7	0.754513	0.774259	0.721721	0.671436	0.768251	0.785603	0.754746	0.715047	0.703728	0.70026	0.733904	0.806463	0.935031	1.22489	1.45978	1.86871	1.98428
	8	0.935423	0.846287	0.81887	0.736199	0.770653	0.761479	0.730825	0.67062	0.653309	0.651213	0.692577	0.773542	0.889933	1.10583	1.44603	1.6725	1.76919
	9	1.42422	1.42275	1.15139	0.888663	0.779169	0.730482	0.741593	0.660456	0.696098	0.662602	0.731238	0.795491	0.944321	1.2765	1.6836	2.07236	2.01062
	10	1.75332	1.68055	1.42108	1.14674	0.901075	0.789256	0.73278	0.695023	0.697653	0.685042	0.734813	0.822316	1.03036	1.67486	2.18806	2.63556	2.9418
	11	1.73482	1.71739	1.37518	1.33334	1.15139	0.926728	0.759922	0.696906	0.73584	0.736535	0.787719	0.848898	1.2089	1.79486	2.28308	2.86119	3.39323
	12	1.25226	1.40544	1.31614	1.33131	1.18777	0.96199	0.748392	0.735278	0.751972	0.761016	0.816551	0.944142	1.2529	1.79023	2.36082	2.58319	3.08612
	13	1.08847	1.16223	1.18507	1.15966	1.13857	0.971292	0.841011	0.729627	0.736605	0.768635	0.91726	1.05313	1.33019	1.8075	2.15113	2.44864	2.74487
	14		0.985367	1.08266	1.08019	1.04418	0.891643	0.776235	0.723476	0.746038	0.797772	0.930632	1.15023	1.46388	1.73599	1.90376	2.05718
	15			0.957554	0.969701	1.00276	0.9434	0.838919	0.746469	0.750365	0.804283	1.00858	1.27419	1.84649
	16				0.922173	0.987561	0.923229	0.800904	0.731155	0.800874	0.806864	0.98997
	17					0.999922	0.967283	0.800392	0.76964	0.795878

## Sheet: Pref
Preferentiality
Signals of insufficient quality were excluded from the property maps. Signals could be rejected based on noise low amplitude, large artefact or ventricluar farfields that could not be substracted.
		1	2	3	4	5	6	7	8	9	10	11	12	13	14	15	16	17
1	1					0.272465	0.330839	0.288442	3.12849	2.96885	1.4825	0.924637	0.722206	0.581826					1																		1
	2					0.460855	0.418809	0.467553	0.249226	1.04016	1.46618	1.10146	1.0278	1.0347	1.32714
	3			0.37685	0.299929	0.493866	0.508271	0.536427	0.243052	0.309033	1.22436	1.12024	0.993523	1.07824	1.48244	1.79108
	4		0.346473	0.320231	0.338741	0.637434	0.623185	0.483724	0.117043	0.245751	1.09885	1.20278	0.943413	0.93002	1.24362	1.69363	2.09099
	5	0.311527	0.189134	0.225334	0.155361	0.580564	0.817963	0.531411	0.093524	3.00937	2.27632	1.66475	0.703422	0.771263	1.24377	1.70766	2.07661	2.34151
	6	0.187163	0.198648	0.220752	0.327695	0.565017	0.685458	0.678375	3.11005	2.93614	2.3482	2.34064	0.313264	0.648235	1.4095	1.64389	1.87331	2.1951
	7	0.0636096	0.145705	0.479371	0.614643	0.768349	0.808533	0.491585	0.00984732	2.54434	2.23112	2.22533	2.09095	1.82654	1.69219	1.57843	1.55601	1.75445
	8	3.10909	0.102066	0.55728	0.716893	0.870664	0.727888	0.529889	0.522686	2.23519	2.27502	2.16812	2.11208	1.93761	1.74483	1.57995	1.4928	1.42868
	9	3.09902	3.08981	0.425191	0.620558	0.77655	0.677945	0.727581	1.14727	2.02138	2.27208	2.19029	2.18795	2.01753	1.77153	1.55264	1.43549	1.31851
	10	3.05153	0.0683285	0.468986	0.737326	0.880989	0.870598	0.834348	1.38618	2.01144	2.29101	2.24315	2.23733	2.10737	1.86971	1.58781	1.37442	1.20938
	11	0.0139689	0.230731	0.681773	0.909401	1.00741	1.1792	1.18661	1.70299	2.11221	2.27165	2.25108	2.26136	2.18156	2.05041	1.92927	1.66416	1.35514
	12	3.13311	0.0984599	2.76594	1.44981	1.39488	1.52021	1.68337	2.0675	2.22241	2.27706	2.29387	2.24214	2.21456	2.18316	2.13154	2.01497	2.00901
	13	2.97524	2.88807	2.53819	2.07245	1.80958	1.94012	2.2223	2.36594	2.38976	2.40453	2.3364	2.22804	2.17464	2.16439	2.19052	2.02641	1.88822
	14		2.71072	2.63557	2.41067	2.25935	2.31531	2.53054	2.57508	2.67276	2.65521	2.49374	2.25097	2.14905	2.04457	2.08307	1.9804
	15			2.60641	2.58578	2.55098	2.72017	2.88846	2.91437	2.98171	2.9492	2.60892	2.28634	2.12036
	16				2.59868	2.68491	3.01013	0.0354803	0.0997687	0.155568	0.186777	0.0775693
	17					2.86424	0.216808	0.342677	0.380278	0.393227
2	1					0.486298	0.44785	0.399184	0.189182	0.295307	1.24908	0.927032	0.805337	0.691427					2																		2
	2					0.450738	0.450138	0.566216	0.502942	1.33655	1.33875	1.18491	1.11606	1.33893	1.67656
	3			0.378035	0.364353	0.429742	0.452405	0.481611	0.589037	1.51279	1.37857	1.25691	1.08716	1.45222	1.68029	1.81942
	4		0.483664	0.34657	0.358223	0.410905	0.524924	0.608171	0.202089	1.77008	1.35034	1.32981	1.03603	0.960325	1.49376	1.77092	2.0379
	5	0.580206	0.437766	0.3387	0.183693	0.428082	0.658093	0.583879	2.73088	2.17804	1.61918	1.50183	0.889017	0.839858	1.32779	1.77514	2.05119	2.34872
	6	0.572455	0.366626	0.400941	0.410596	0.44001	0.638253	0.575394	2.97701	2.31627	1.93252	1.93271	0.796507	0.982703	1.42148	1.62898	1.7915	2.17552
	7	0.368188	0.422586	0.746426	0.776012	0.891204	0.778289	0.724502	0.786344	1.90325	1.98627	2.06255	1.98495	1.54931	1.56402	1.57029	1.52136	1.60467
	8	0.159315	1.31531	0.780808	0.866129	1.00723	0.889397	0.906604	1.16756	1.61659	2.00135	2.03229	2.01143	1.8293	1.68132	1.54596	1.48843	1.42975
	9	0.0403345	3.10337	0.476419	0.775705	0.93025	0.890676	0.873963	1.30491	1.69874	2.12984	2.13758	2.19685	2.00028	1.72852	1.52472	1.41445	1.31899
	10	2.77486	3.04996	0.109347	0.847041	0.971124	0.981049	1.21569	1.52735	1.9006	2.15212	2.25183	2.29883	2.15487	1.87574	1.60229	1.36327	1.23761
	11	2.90709	2.80243	0.366603	1.21988	1.2924	1.38802	1.57894	1.79569	2.06484	2.23884	2.298	2.31313	2.24325	2.03979	1.92549	1.65329	1.41227
	12	2.84084	2.50242	2.19864	1.57824	1.56153	1.70884	1.95051	2.09723	2.17587	2.30704	2.33272	2.34027	2.2709	2.19088	2.12147	1.99021	1.95425
	13	2.71041	2.54213	2.42047	2.16579	1.99021	2.05498	2.20764	2.32371	2.39012	2.46954	2.49719	2.42195	2.22299	2.14764	2.13738	2.02072	1.8833
	14		2.55716	2.56559	2.44604	2.31455	2.31735	2.48459	2.52029	2.61684	2.70704	2.69947	2.52019	2.26997	2.07668	2.091	2.01811
	15			2.57487	2.55524	2.59102	2.67465	2.80931	2.85333	2.95774	2.97685	2.88222	2.68877	2.34024
	16				2.62551	2.71878	2.87426	3.01982	3.13787	0.127125	0.21571	0.267838
	17					2.87941	0.00702095	0.203781	0.337667	0.394949
3	1					0.621826	0.524541	0.396687	0.179531	0.518968	1.45749	0.975762	0.799768	0.617656					3																		3
	2					0.486101	0.470402	0.439504	0.172911	1.55622	1.33712	1.11966	1.03576	1.09996	1.32817
	3			0.320532	0.352437	0.405553	0.505852	0.39202	0.247855	0.363408	1.21593	1.04108	0.971828	1.09988	1.51962	1.83615
	4		0.333556	0.267326	0.30615	0.363121	0.478148	0.361214	0.144288	0.182452	0.86614	1.11812	0.862321	0.854536	1.22845	1.79089	2.13035
	5	0.393492	0.268564	0.234152	0.288617	0.485915	0.534215	0.439967	0.0598643	3.08874	1.20447	1.11449	0.78146	0.839052	1.21295	1.66243	2.09042	2.42226
	6	0.309217	0.337172	0.317319	0.370083	0.536773	0.457134	0.241091	3.12553	2.87039	2.52359	2.04689	0.742279	0.903877	1.38081	1.58168	1.94286	2.20722
	7	0.242325	0.292862	0.405208	0.495703	0.840006	0.605665	0.560285	0.337541	2.53573	2.26363	2.11384	1.61275	1.35438	1.49473	1.49751	1.63932	1.86369
	8	0.190461	0.560527	0.598733	0.723608	0.983069	0.727883	0.714516	0.75944	1.67871	2.09912	2.05709	1.96187	1.76934	1.64206	1.5498	1.51797	1.46874
	9	0.0119055	0.106273	0.477247	0.71834	0.8933	0.805485	0.831415	1.02855	1.70672	2.08673	2.07599	2.04201	1.9122	1.70641	1.5431	1.37459	1.25344
	10	3.02411	3.06536	0.23481	0.77448	0.950147	0.992972	1.0423	1.35372	1.90306	2.10534	2.11479	2.12988	2.05956	1.87355	1.66173	1.30446	1.21164
	11	2.96312	2.90674	0.168213	1.14994	1.26755	1.32544	1.50429	1.75665	2.09716	2.16742	2.18846	2.14723	2.08959	2.0596	2.00578	1.75836	1.33024
	12	2.75794	2.61731	1.8686	1.61021	1.62002	1.70439	1.87523	2.04927	2.15898	2.14078	2.18173	2.18754	2.14198	2.15663	2.14129	2.09552	2.09128
	13	2.63533	2.68022	2.28383	2.11697	2.05627	2.07231	2.21178	2.30386	2.32271	2.34175	2.32549	2.21773	2.15781	2.14642	2.2094	2.05994	2.03086
	14		2.56274	2.5389	2.44295	2.36909	2.37177	2.50564	2.51061	2.5776	2.59118	2.5312	2.3394	2.22568	2.15351	2.20679	2.13393
	15			2.58476	2.55495	2.61081	2.68415	2.80386	2.82948	2.91362	2.87525	2.68564	2.44154	2.23796
	16				2.64333	2.71189	2.8766	3.02143	3.1395	0.145016	0.214566	0.108831
	17					2.82991	0.0514704	0.244216	0.339679	0.417123
4	1					0.207842	0.176988	0.222644	0.0177286	2.78309	2.85411	0.813129	0.76121	0.621577					4																		4
	2					0.288873	0.281792	0.326889	0.185524	2.35749	1.41335	1.03647	1.05164	1.09919	1.37225
	3			0.337347	0.316069	0.278922	0.224988	0.273527	0.329102	2.78464	1.20452	1.0732	1.05467	1.12719	1.45115	1.72503
	4		0.443156	0.367619	0.294992	0.386662	0.458426	0.451926	0.291725	0.0516269	1.43029	1.15869	0.986217	0.953538	1.32976	1.74141	1.95523
	5	0.435438	0.504563	0.358373	0.413316	0.577615	0.599738	0.405954	0.0410668	2.48455	1.71991	1.49114	0.883196	0.979524	1.31896	1.73716	2.0264	2.31926
	6	0.44619	0.510501	0.445815	0.551971	0.562461	0.633999	0.109743	2.9505	2.47217	2.01125	1.83713	0.95304	1.05042	1.4049	1.6345	1.77075	2.13734
	7	0.385799	0.557046	0.663159	0.7714	0.945735	0.758466	0.782481	1.23653	1.93505	2.04435	2.00787	1.71575	1.55403	1.61218	1.52662	1.47365	1.58766
	8	0.288761	0.768695	0.926582	0.93592	1.03585	0.965241	0.989078	1.40642	1.75086	2.07539	2.01299	1.90412	1.7628	1.67657	1.54387	1.47004	1.41106
	9	3.07553	0.442206	0.754996	0.974431	1.07624	0.925253	1.08002	1.4173	1.84779	2.17526	2.10192	2.07476	1.87889	1.69757	1.50773	1.4252	1.33537
	10	2.89816	3.00433	0.512777	0.942124	1.10269	1.06207	1.21106	1.59796	1.98096	2.19403	2.17872	2.16681	2.03221	1.81682	1.62963	1.40302	1.3698
	11	2.93249	2.83249	0.747826	1.24757	1.33661	1.25323	1.44746	1.79967	2.11278	2.26399	2.23416	2.18401	2.10542	1.99769	1.95153	1.85705	1.68493
	12	2.91988	2.74446	2.17494	1.70021	1.66544	1.68496	1.81835	2.11181	2.22187	2.27214	2.26249	2.20387	2.21709	2.17065	2.14808	2.11213	2.0858
	13	2.80269	2.65528	2.33913	2.11888	2.02923	2.04863	2.21082	2.30226	2.41069	2.43129	2.40004	2.27374	2.18985	2.1277	2.1749	2.12508	2.063
	14		2.61688	2.52491	2.4184	2.29501	2.2852	2.49834	2.55384	2.63281	2.64367	2.59611	2.42676	2.24833	2.12621	2.13151	2.13436
	15			2.56483	2.5325	2.52952	2.62646	2.7951	2.84569	2.94854	2.9191	2.75356	2.52011	2.34153
	16				2.60132	2.67359	2.89942	3.06738	0.0131415	0.0983333	0.132407	0.0331729
	17					2.88015	0.113594	0.222466	0.330135	0.403364
5	1					0.234679	0.111139	0.0875926	0.0873843	0.0320511	0.0644366	0.666708	0.627363	0.506614					5																		5
	2					0.328067	0.217396	0.184982	0.123459	0.0428842	1.00762	0.987876	0.941691	1.00181	1.37732
	3			0.350457	0.280853	0.377372	0.250662	0.154146	0.178598	0.0661658	0.911656	1.0149	0.929982	1.05838	1.48343	1.74022
	4		0.131729	0.28985	0.235459	0.379103	0.469106	2.96913	3.06889	3.10344	1.08527	0.944962	0.838023	0.835976	1.20476	1.77748	2.1513
	5	0.240587	0.135152	0.171253	0.255278	0.616805	0.784738	0.182508	2.89337	2.74953	1.13723	0.696117	0.683066	0.840346	1.24437	1.71413	2.09092	2.3391
	6	0.309618	0.16269	0.178347	0.315239	0.53591	3.12471	2.5106	2.8119	2.60332	2.13171	2.71012	0.396214	0.815749	1.40726	1.62169	1.85699	2.19943
	7	0.0732381	3.05984	0.389573	0.557765	1.1139	1.11037	0.982071	1.1756	2.03061	2.17844	2.28012	1.95675	1.4706	1.52521	1.53496	1.57218	1.74396
	8	3.0122	3.12148	0.426337	0.702978	1.04592	1.07086	1.05324	1.17196	1.98532	2.27242	2.24276	2.10975	1.88488	1.67973	1.57601	1.50196	1.47567
	9	2.96378	3.01924	0.176532	0.576595	0.896054	0.842394	0.974166	1.24188	2.01236	2.28525	2.2455	2.20633	2.00744	1.75013	1.52888	1.41226	1.33595
	10	2.83194	3.04293	0.138129	0.643266	0.874937	0.953588	0.951093	1.72696	2.13418	2.32034	2.2689	2.2859	2.1708	1.85909	1.65182	1.35547	1.1605
	11	2.95078	2.94276	0.27772	0.739308	0.894844	1.1834	1.58294	1.98541	2.15379	2.31867	2.30601	2.29245	2.24544	2.05651	1.92391	1.7089	1.28956
	12	3.02117	2.90586	2.88916	1.55329	1.47531	1.69359	1.98129	2.15331	2.26364	2.38922	2.32807	2.25504	2.21607	2.17012	2.11495	2.09726	1.94426
	13	2.82935	2.83349	2.65833	2.28528	1.97277	2.08753	2.26886	2.39129	2.50726	2.56341	2.55826	2.38093	2.18579	2.10864	2.10918	2.08981	1.88473
	14		2.73498	2.74963	2.40014	2.31445	2.36956	2.53322	2.61046	2.73614	2.77191	2.70526	2.50266	2.22391	2.12068	2.07826	2.14278
	15			2.65015	2.55418	2.59567	2.72697	2.89233	2.95273	3.00901	3.0615	2.83073	2.62795	2.44236
	16				2.63907	2.76067	2.94173	3.11358	0.0527422	0.130584	0.191153	0.0769779
	17					2.93055	0.125559	0.245194	0.336519	0.345693
6	1					0.200826	0.187812	0.147073	0.0961178	0.0493897	0.0779662	0.730686	0.594328	0.273611					6																		6
	2					0.398239	0.318856	0.22631	0.199383	1.35491	1.18258	1.02884	0.973982	1.01255	1.24369
	3			0.269576	0.290577	0.412196	0.327323	0.370866	0.261522	0.698685	1.16925	1.07108	0.976388	1.03535	1.43426	1.69796
	4		0.417182	0.339902	0.512096	0.471956	0.345393	0.47027	0.0443755	0.358055	1.24716	1.15548	0.959394	0.985205	1.30004	1.70696	2.0512
	5	0.425704	0.374756	0.291809	0.345584	0.521009	0.744924	3.06163	2.91795	2.5916	1.5034	1.3761	0.895833	1.02232	1.36963	1.72533	2.02458	2.25448
	6	0.364287	0.408733	0.352424	0.420273	0.77902	0.611651	2.97014	2.72932	2.48948	1.9466	1.85905	0.999749	1.20393	1.45924	1.65512	1.8298	2.06778
	7	0.425755	0.410557	0.739465	0.773438	1.13946	0.985647	0.57246	2.73137	2.12073	1.97843	1.98666	1.72962	1.50315	1.55285	1.55558	1.61487	1.75571
	8	0.175564	0.0433751	0.705048	0.826641	1.07319	1.13045	1.03168	0.86055	2.01437	2.04178	1.98438	1.90455	1.7284	1.63147	1.56324	1.52347	1.56193
	9	0.0500158	2.99322	0.501176	0.682251	0.881809	0.789669	0.992767	1.40399	1.96395	2.11762	2.11014	2.08759	1.92241	1.68444	1.55507	1.48097	1.41056
	10	2.93922	3.10469	0.2034	0.686328	0.992767	1.04061	1.13902	1.47447	1.98645	2.21503	2.21416	2.2559	2.1173	1.84712	1.585	1.36178	1.24252
	11	2.99521	2.93933	0.298671	0.952988	1.21401	1.29513	1.401	1.73894	2.11822	2.30161	2.286	2.28608	2.18976	2.05246	1.93614	1.68749	1.37053
	12	2.97561	2.9272	2.44828	1.95362	1.6057	1.6027	1.78296	2.02549	2.27712	2.37318	2.38078	2.3319	2.26052	2.19842	2.09739	1.97282	1.84393
	13	3.05279	2.87922	2.611	2.45976	2.10561	2.03941	2.14348	2.36807	2.46711	2.50086	2.46378	2.31376	2.18369	2.14356	2.11804	1.97508	1.82983
	14		2.74838	2.62596	2.57562	2.37225	2.29553	2.52352	2.61799	2.69018	2.72085	2.64703	2.40782	2.18123	2.09674	2.08936	2.03833
	15			2.64317	2.58659	2.57387	2.61215	2.81496	2.92637	3.00004	3.00469	2.7504	2.49911	2.2863
	16				2.60819	2.63075	2.78807	3.0754	0.0420013	0.165383	0.329929	0.475272
	17					2.72089	0.00515688	0.298983	0.396753	0.455085
7	1					0.262868	0.143753	0.0860856	0.0613069	3.11105	3.05559	0.6091	0.512311	0.45383					7																		7
	2					0.353627	0.259484	0.116783	0.115452	0.453716	1.13276	0.927508	0.902519	1.01301	1.50638
	3			0.23792	0.228648	0.303446	0.198303	0.0405568	0.0452403	3.00526	1.02737	0.995627	1.00479	1.17273	1.6072	1.79655
	4		0.315752	0.254489	0.232965	0.301288	0.281844	0.032833	3.00141	2.84131	1.04541	1.21128	1.01387	1.12974	1.43273	1.76388	2.14876
	5	0.396387	0.339206	0.239793	0.173352	0.358825	0.309803	0.0309579	2.9925	2.63876	1.87002	1.61284	0.772146	0.812253	1.28568	1.78826	2.09811	2.37813
	6	0.394445	0.2936	0.22616	0.323437	0.521007	0.407798	0.213232	3.02696	2.59896	2.11752	2.14103	0.290067	0.730789	1.45722	1.69199	1.85749	2.20272
	7	0.324286	0.244367	0.548665	0.610315	0.711418	0.710177	0.657284	0.77008	1.97942	2.0707	2.19119	2.18888	1.84116	1.68996	1.64629	1.63218	1.75485
	8	0.00597504	0.188877	0.538541	0.744303	1.018	0.935478	1.05587	1.09905	1.73826	2.11967	2.18369	2.16117	1.97192	1.79209	1.59501	1.58299	1.55075
	9	2.93046	3.04891	0.341216	0.771452	0.968025	0.913689	0.998129	1.37687	1.81959	2.14707	2.20843	2.22166	2.04203	1.8154	1.59478	1.44644	1.3159
	10	2.99405	3.10218	0.344101	0.830795	1.0772	1.05294	1.27334	1.59948	1.92993	2.17441	2.2292	2.26584	2.15482	1.88387	1.58161	1.32345	1.16215
	11	2.89649	3.0351	0.493394	0.945975	1.13759	1.31299	1.58275	1.81353	2.06452	2.19075	2.23221	2.266	2.20007	2.07515	1.99123	1.77387	1.11538
	12	2.91024	2.99742	2.85397	1.70677	1.60939	1.61066	1.87509	2.10862	2.21306	2.27238	2.2856	2.25684	2.25203	2.19809	2.13757	1.99507	1.89569
	13	2.98793	2.7188	2.59616	2.35857	2.1238	2.06317	2.24465	2.36163	2.47029	2.51087	2.49792	2.37997	2.21359	2.14621	2.17601	2.06335	1.92918
	14		2.63232	2.57397	2.52388	2.40682	2.41779	2.53949	2.60576	2.69575	2.71901	2.6608	2.49219	2.27758	2.16311	2.21721	2.14049
	15			2.57662	2.5896	2.64818	2.72748	2.81218	2.86783	2.94244	2.91456	2.79282	2.63455	2.43728
	16				2.62852	2.77146	2.91203	3.00332	3.11612	0.070138	0.086403	3.12097
	17					2.95384	0.0198713	0.163056	0.255919	0.308124
8	1					0.453524	0.257372	0.0890154	0.0119568	2.93597	2.72179	0.633228	0.562694	0.441542					8																		8
	2					0.558421	0.29333	0.11073	0.00193127	2.98964	0.921189	0.912685	0.863064	0.850971	1.31756
	3			0.262245	0.336752	0.482299	0.276912	0.0635042	3.11399	3.10149	0.702574	0.831252	0.792907	0.77735	1.29568	1.691
	4		0.430642	0.358844	0.399178	0.471595	0.475993	0.0438731	3.06163	2.9704	0.743562	0.766177	0.723901	0.827294	1.18212	1.70593	2.03306
	5	0.355477	0.373402	0.257211	0.338276	0.722228	0.904575	2.95075	2.97267	3.0087	0.289423	0.500788	0.652241	0.86254	1.25791	1.72465	2.01481	2.2457
	6	0.327213	0.382516	0.370305	0.424987	0.682065	0.60829	0.0910747	3.03314	2.96157	2.86091	0.0691324	0.577704	0.978992	1.45191	1.7222	1.85863	2.06818
	7	0.246658	0.295949	0.524966	0.708521	0.890293	0.853939	0.676405	0.302468	3.0984	2.5942	2.27237	1.23317	1.39338	1.60271	1.62819	1.64449	1.79074
	8	3.08046	0.240398	0.643574	0.792408	1.01684	0.986622	0.973133	0.730775	0.0596884	2.41614	2.26266	2.07861	1.75819	1.69386	1.60228	1.54088	1.58169
	9	2.90471	3.12905	0.249433	0.551299	0.90373	0.922944	0.970345	1.13543	1.63678	2.2592	2.29946	2.25706	2.01093	1.76585	1.58657	1.47911	1.38757
	10	2.83325	3.04485	0.286263	0.514042	0.936654	1.07121	1.12836	1.32363	1.7877	2.22689	2.27224	2.31656	2.15254	1.90506	1.64263	1.41422	1.26069
	11	2.97044	2.89649	0.516587	0.866847	1.14535	1.25168	1.41884	1.54265	1.99827	2.24569	2.28428	2.30629	2.20037	2.06055	2.05004	1.87701	1.47421
	12	3.07938	2.95376	2.44281	1.57957	1.7212	1.60071	1.6308	2.03429	2.14693	2.26128	2.289	2.34017	2.28861	2.28572	2.25193	2.11372	2.12369
	13	3.0098	2.87926	2.62622	2.15653	2.00085	1.92215	2.22954	2.36338	2.42271	2.46469	2.45136	2.30869	2.23435	2.23743	2.28761	2.11631	2.04702
	14		2.79555	2.68048	2.49802	2.28715	2.34586	2.60511	2.72117	2.74423	2.79171	2.70161	2.49013	2.24351	2.16286	2.28583	2.11838
	15			2.63156	2.55211	2.55475	2.76634	3.00578	3.04944	0.0140702	0.0143415	2.91433	2.30887	2.26186
	16				2.607	2.68457	3.01457	0.0559147	0.166837	0.276883	0.408756	0.39326
	17					2.7935	0.226851	0.366275	0.398888	0.49191
9	1					0.347835	0.280854	0.171666	0.0991591	0.119965	0.166257	0.61372	0.489138	0.376329					9																		9
	2					0.333733	0.326791	0.286967	0.315551	0.471499	0.986107	0.950165	0.932844	1.01739	1.43472
	3			0.271565	0.321256	0.302694	0.295707	0.375025	0.303585	0.595616	1.08588	1.05644	1.00056	1.17634	1.56554	1.80513
	4		0.369409	0.218072	0.21951	0.279894	0.401976	0.518282	0.190136	0.888111	1.22654	1.05564	0.95876	1.03535	1.3647	1.71103	2.07479
	5	0.378108	0.342278	0.183459	0.125526	0.436363	0.675589	0.866184	2.991	2.29887	1.54945	0.991571	0.899319	0.991574	1.38444	1.76839	2.09375	2.36545
	6	0.405875	0.386429	0.2687	0.336311	0.684153	0.584603	0.445919	3.11722	2.95459	2.16434	2.59844	0.829753	0.986575	1.45434	1.69674	1.88964	2.17751
	7	0.275856	0.344091	0.489921	0.68145	0.853403	0.848546	0.781496	0.503418	2.36044	2.14782	2.12176	1.88262	1.5994	1.60912	1.61033	1.63009	1.73693
	8	0.0361302	0.166936	0.723001	0.832791	1.03909	0.887795	0.829689	0.982986	1.92167	2.19835	2.14508	2.03227	1.85015	1.70044	1.58179	1.55086	1.51293
	9	2.9715	3.00041	0.486206	0.753086	1.01664	0.86863	1.04977	1.24178	1.77101	2.1752	2.19081	2.15183	2.04731	1.74944	1.56576	1.44213	1.31107
	10	2.78825	2.93	0.488478	0.911979	1.04449	0.979544	1.13025	1.39508	1.9024	2.18582	2.27475	2.28249	2.17366	1.84873	1.60598	1.36976	1.23099
	11	2.9091	2.8351	0.951182	0.95929	1.20297	1.23895	1.36065	1.58097	2.06946	2.22493	2.29334	2.28052	2.23583	2.077	1.96273	1.83441	1.40223
	12	2.94613	2.96775	1.95335	1.72607	1.58867	1.60528	1.7158	1.90889	2.18182	2.35619	2.34583	2.30189	2.28851	2.2238	2.18235	2.11472	2.0897
	13	2.92182	2.93685	2.46344	2.1244	1.90192	1.94382	2.19635	2.4028	2.51174	2.59999	2.56548	2.44784	2.274	2.14742	2.1623	2.10642	2.05662
	14		2.7484	2.66582	2.53364	2.32252	2.36528	2.57384	2.66937	2.80145	2.86283	2.81525	2.59649	2.31231	2.14181	2.18894	2.1304
	15			2.64136	2.6284	2.62506	2.73763	2.92022	2.99367	3.07544	3.10063	2.96016	2.74113	2.35472
	16				2.7048	2.80397	2.98341	0.0129738	0.104921	0.181147	0.204338	0.12233
	17					3.0059	0.198317	0.293727	0.378464	0.396286
10	1					0.136542	0.095634	0.00882325	3.07727	0.0374618	0.140302	0.526543	0.428758	0.338668					10																		10
	2					0.141243	0.12356	0.0513368	0.132662	0.288512	1.26174	0.845158	0.765819	0.714393	1.12026
	3			0.295501	0.261267	0.25043	0.162754	0.0722934	0.120186	0.186205	0.880085	0.925023	0.814777	0.823316	1.32947	1.71775
	4		0.243849	0.282098	0.228265	0.247162	0.327712	0.195592	0.0483894	3.09834	0.911341	0.887804	0.812752	0.834893	1.24228	1.73086	2.14606
	5	0.305603	0.179272	0.217248	0.201486	0.381861	0.50198	3.09651	2.96608	2.93279	1.24956	0.915583	0.797418	0.900119	1.30533	1.70951	2.0643	2.34709
	6	0.13966	0.25468	0.356195	0.363386	0.575764	0.756869	3.13565	2.87622	2.87042	2.31481	0.907828	0.895323	1.04797	1.47005	1.66335	1.85564	2.03702
	7	0.141521	0.157987	0.630742	0.681822	0.909018	0.976808	0.382756	3.11577	2.52475	2.21349	2.1768	1.65873	1.46272	1.54493	1.59513	1.56803	1.64411
	8	0.00320724	0.563279	0.679912	0.766353	0.95701	0.980685	1.10963	0.840387	2.31673	2.28041	2.13748	2.03659	1.85028	1.65639	1.54634	1.50249	1.53642
	9	0.0574576	0.144607	0.5617	0.748216	0.875653	0.795483	0.844393	1.19953	1.94345	2.35944	2.20585	2.18711	1.99265	1.77282	1.59414	1.38037	1.24566
	10	0.04783	0.108524	0.472679	0.70065	1.02633	1.04327	1.1674	1.42529	2.0719	2.31354	2.34406	2.31963	2.16892	1.89816	1.66415	1.38153	1.22872
	11	0.000854186	3.06658	0.394809	0.953761	1.2563	1.35648	1.45318	1.8925	2.21667	2.38061	2.41978	2.37477	2.24482	2.07042	1.95439	1.68565	1.32631
	12	3.05063	0.0925022	0.317088	1.58754	1.70676	1.7466	1.9417	2.1485	2.28491	2.47591	2.5384	2.43164	2.33843	2.27076	2.18611	2.01153	1.90639
	13	2.97967	3.04741	2.89156	2.42559	2.05195	2.1148	2.32984	2.44067	2.47383	2.59406	2.62583	2.42291	2.25212	2.30051	2.21233	2.10406	1.93343
	14		2.92607	2.81963	2.57816	2.34507	2.37324	2.58843	2.60048	2.75958	2.88826	2.75817	2.36522	2.23554	2.13858	2.11812	2.06517
	15			2.69418	2.63065	2.58035	2.75104	2.9326	2.99318	3.10998	0.0423342	2.98722	2.50649	2.18584
	16				2.69658	2.73163	2.96381	0.0466912	0.165072	0.269956	0.370999	0.474716
	17					2.85343	0.16723	0.349911	0.444219	0.45972
