# Supplementary material for: Stationary Atrial Fibrillation Properties in the Goat Do Not Entail Stable or Recurrent Conduction Patterns
Source: Front Physiol. 2018 Jul 27;9:947. doi: 10.3389/fphys.2018.00947 (PMC6072874; doi:10.3389/fphys.2018.00947)
Supplement: Supplementary file 1 [file Data_Sheet_1.ZIP › Goat_6_Property maps.xlsx]

## Sheet: AFCL
AFCL
Signals of insufficient quality were excluded from the property maps. Signals could be rejected based on noise low amplitude, large artefact or ventricluar farfields that could not be substracted.
		1	2	3	4	5	6	7	8	9	10	11	12	13	14	15	16	17
1	1					0.142926	0.142445	0.141963	0.138595	0.13282	0.131858	0.131858	0.131858						1																		1
	2					0.14052	0.137632	0.14052	0.14052	0.137632	0.13667	0.13282	0.133782	0.134745
	3			0.130895	0.134745	0.13282	0.135707	0.134745	0.13667	0.13667	0.133782	0.133782	0.134745	0.13667	0.13667
	4		0.12512	0.126083	0.129933	0.130895	0.133782	0.13282	0.135707	0.135707	0.134745	0.131858	0.131858	0.13282	0.131858	0.131858
	5	0.123195	0.12512	0.124158	0.126083	0.130895	0.13282	0.132339	0.13282	0.135707	0.135707	0.13282	0.130895	0.130895	0.129451	0.12897	0.129933
	6	0.122233	0.124158	0.126083	0.127045	0.12897	0.129933	0.129933	0.129933	0.131858	0.133782	0.134745	0.130895	0.130895	0.12897	0.128008	0.126083	0.126083
	7	0.122233	0.122233	0.12127	0.118383	0.118383	0.120308	0.12512	0.128008	0.129933	0.13282	0.135707	0.130895	0.129933	0.129933	0.128008	0.126083	0.124158
	8	0.123195	0.120308	0.118383	0.116458	0.117421	0.117902	0.118383	0.12512	0.12897	0.130895	0.135707	0.131858	0.128008	0.129933	0.128008	0.126083	0.124158
	9	0.124158	0.120308	0.118383	0.116458	0.116458	0.118383	0.118383	0.120308	0.123677	0.127045	0.13282	0.137632	0.129451	0.127045	0.126083	0.124158	0.123195
	10	0.125602	0.123195	0.118383	0.115496	0.116939	0.117421	0.118383	0.119346	0.119346	0.120308	0.12512	0.128008	0.128008	0.126083	0.126083	0.123195	0.123195
	11	0.12897	0.12512	0.122233	0.119346	0.118383	0.117421	0.117421	0.117421	0.120308	0.123195	0.123195	0.12127	0.122233	0.126083	0.12512	0.124158	0.123195
	12	0.127045	0.123195	0.12127	0.120308	0.119346	0.119346	0.117421	0.117421	0.12127	0.120308	0.118383	0.116458	0.114533	0.115496	0.117421	0.126083	0.12512
	13	0.124639	0.12512	0.123195	0.124158	0.122233	0.12512	0.116458	0.115496	0.115496	0.114533	0.115496	0.113571	0.110683	0.110683	0.110683	0.114533	0.114533
	14		0.128008	0.126083	0.126564	0.12512	0.12127	0.118383	0.114533	0.112608	0.112608	0.111646	0.110683	0.109721	0.107796	0.109721	0.109721
	15			0.123195	0.122233	0.12127	0.118383	0.117421	0.114533	0.111646	0.111646	0.110683	0.109721	0.108758	0.108277	0.108758
	16				0.118383	0.118383	0.118383	0.116458	0.113571	0.112608	0.112608	0.110683	0.109721	0.108758	0.108758
	17					0.118383	0.117421	0.113571	0.112608	0.112608	0.111646	0.110683	0.109721	0.108758
2	1					0.142445	0.143407	0.143407	0.137632	0.13282	0.131858	0.131858	0.131858						2																		2
	2					0.139557	0.13667	0.138595	0.139557	0.133782	0.13667	0.13667	0.13667	0.13667
	3			0.130895	0.13282	0.133301	0.13667	0.135707	0.135707	0.134745	0.130895	0.129451	0.131858	0.133782	0.135707
	4		0.12512	0.12512	0.128008	0.131858	0.133782	0.133782	0.134745	0.134745	0.133782	0.129933	0.128008	0.12897	0.12897	0.129933
	5	0.122233	0.12512	0.12512	0.127045	0.131858	0.13282	0.133782	0.131858	0.134745	0.133301	0.13282	0.129933	0.128008	0.127045	0.12512	0.12512
	6	0.122233	0.122233	0.12512	0.128008	0.128008	0.13282	0.130895	0.129933	0.130895	0.134745	0.133782	0.129451	0.128008	0.127045	0.124158	0.123195	0.122233
	7	0.123195	0.122233	0.12127	0.119346	0.117421	0.123195	0.126083	0.127045	0.129933	0.133782	0.134745	0.128008	0.127045	0.128489	0.12512	0.123195	0.120308
	8	0.122233	0.119346	0.118383	0.117421	0.117421	0.118383	0.118383	0.124158	0.128008	0.13282	0.133782	0.12897	0.124158	0.128008	0.126083	0.12127	0.119346
	9	0.124158	0.120308	0.118383	0.117421	0.118383	0.117421	0.118383	0.119827	0.122233	0.126083	0.131858	0.135707	0.126564	0.123195	0.122233	0.120308	0.119346
	10	0.128008	0.12512	0.119346	0.118383	0.119346	0.118383	0.118383	0.117421	0.118383	0.12127	0.124158	0.127045	0.126083	0.124158	0.122233	0.119346	0.119346
	11	0.131858	0.127045	0.122233	0.12127	0.120308	0.119827	0.119346	0.116458	0.119346	0.122233	0.122233	0.120308	0.120308	0.123195	0.123195	0.120308	0.120308
	12	0.128008	0.126083	0.124158	0.123195	0.120308	0.12127	0.119346	0.117421	0.119346	0.119346	0.116458	0.113571	0.112608	0.114533	0.114533	0.122233	0.120308
	13	0.126083	0.126083	0.126083	0.126083	0.126083	0.124158	0.116458	0.114533	0.113571	0.112608	0.113571	0.112127	0.108758	0.110683	0.111646	0.112608	0.113571
	14		0.12897	0.12512	0.126083	0.123195	0.119346	0.117421	0.114533	0.111646	0.110683	0.110683	0.109721	0.108758	0.110683	0.110683	0.110683
	15			0.123195	0.122233	0.12127	0.118383	0.116458	0.114533	0.111646	0.110683	0.109721	0.109721	0.10924	0.109721	0.109721
	16				0.119346	0.118383	0.116458	0.114533	0.113571	0.111646	0.110202	0.109721	0.108758	0.108758	0.108758
	17					0.118383	0.115496	0.112608	0.112608	0.111646	0.110683	0.109721	0.109721	0.109721
3	1					0.14052	0.141482	0.142445	0.137151	0.129933	0.130895	0.130895	0.129933						3																		3
	2					0.13667	0.133782	0.134264	0.137632	0.13282	0.13282	0.131858	0.131858	0.132339
	3			0.127045	0.132339	0.131858	0.13282	0.13282	0.133782	0.13282	0.129933	0.129933	0.129933	0.131858	0.131858
	4		0.118383	0.119346	0.124158	0.129933	0.131858	0.130895	0.133782	0.134745	0.130895	0.12897	0.128008	0.12897	0.128008	0.128008
	5	0.116458	0.118383	0.118383	0.124158	0.128008	0.131858	0.131858	0.131858	0.134745	0.135707	0.129933	0.128008	0.126083	0.12512	0.12512	0.12512
	6	0.117421	0.117421	0.12127	0.123195	0.124158	0.127045	0.128008	0.12897	0.130895	0.134745	0.130895	0.12897	0.126083	0.12512	0.124158	0.12512	0.123195
	7	0.116458	0.116458	0.115496	0.114533	0.113571	0.115496	0.12127	0.126083	0.129933	0.133301	0.133782	0.12897	0.12512	0.126083	0.12512	0.124158	0.123195
	8	0.118383	0.115496	0.113571	0.111646	0.111646	0.113571	0.114533	0.120308	0.127045	0.129933	0.133782	0.129933	0.126083	0.127045	0.12512	0.123195	0.122233
	9	0.119346	0.116458	0.113571	0.112608	0.111646	0.113571	0.114533	0.114533	0.117421	0.122233	0.130895	0.134745	0.127045	0.126083	0.124639	0.122233	0.12127
	10	0.123195	0.119346	0.113571	0.111646	0.111646	0.114533	0.115496	0.115496	0.115496	0.118383	0.122233	0.12512	0.124158	0.126083	0.123195	0.12127	0.12127
	11	0.12897	0.124158	0.117421	0.114533	0.113571	0.114533	0.116458	0.114533	0.118383	0.120308	0.12127	0.12127	0.120308	0.124158	0.124158	0.122233	0.122233
	12	0.12512	0.122233	0.118383	0.116458	0.115496	0.117421	0.115496	0.115496	0.118383	0.118383	0.115496	0.116458	0.115496	0.114533	0.116458	0.123195	0.12127
	13	0.122233	0.122233	0.120308	0.12127	0.123195	0.123195	0.115496	0.112608	0.112608	0.112608	0.113571	0.112608	0.10924	0.109721	0.110683	0.112608	0.113571
	14		0.126083	0.123677	0.122233	0.122233	0.117421	0.115496	0.111646	0.110683	0.111646	0.110683	0.109721	0.109721	0.107796	0.108758	0.109721
	15			0.119346	0.120308	0.119346	0.115496	0.113571	0.111646	0.110683	0.110683	0.108758	0.108758	0.107796	0.107796	0.107796
	16				0.116458	0.116458	0.116458	0.113571	0.111165	0.109721	0.109721	0.109721	0.109721	0.108758	0.107796
	17					0.114533	0.114533	0.111646	0.110683	0.110683	0.110683	0.109721	0.108758	0.107796
4	1					0.139557	0.14052	0.14052	0.137632	0.129933	0.12897	0.129933	0.129451						4																		4
	2					0.138595	0.135707	0.13667	0.13667	0.13282	0.133782	0.131858	0.13282	0.133782
	3			0.127045	0.131858	0.131858	0.133782	0.133782	0.13282	0.13282	0.130414	0.129933	0.131858	0.133782	0.130895
	4		0.12127	0.122233	0.126083	0.12897	0.131858	0.131858	0.131858	0.133782	0.131858	0.128008	0.12897	0.12897	0.12897	0.128008
	5	0.120308	0.122233	0.123195	0.12512	0.128008	0.130895	0.131858	0.130895	0.134264	0.133782	0.12897	0.127045	0.127045	0.127045	0.12512	0.124158
	6	0.119346	0.12127	0.122233	0.123195	0.124158	0.12512	0.127045	0.128008	0.129933	0.133782	0.130895	0.126083	0.126083	0.126083	0.123195	0.123195	0.12127
	7	0.120308	0.119346	0.117421	0.115496	0.114533	0.116458	0.120308	0.12512	0.128008	0.131858	0.134745	0.127045	0.12512	0.127045	0.12512	0.122233	0.119346
	8	0.120789	0.118383	0.115496	0.113571	0.114533	0.115496	0.116458	0.118383	0.126564	0.129933	0.133782	0.128008	0.124158	0.127045	0.123195	0.119346	0.119346
	9	0.12127	0.117421	0.115496	0.113571	0.114533	0.114533	0.114533	0.115496	0.116939	0.123195	0.129933	0.131858	0.125602	0.123195	0.122233	0.120308	0.119346
	10	0.12512	0.122233	0.114533	0.113571	0.114533	0.114533	0.115496	0.114533	0.116458	0.117421	0.122233	0.126083	0.124158	0.124158	0.12127	0.119346	0.119346
	11	0.130895	0.12512	0.118864	0.117421	0.116458	0.115496	0.115496	0.114533	0.117421	0.118864	0.118383	0.118383	0.119346	0.12127	0.122233	0.12127	0.120308
	12	0.124158	0.12127	0.119346	0.118383	0.116458	0.117421	0.115496	0.115496	0.117421	0.117421	0.116458	0.113571	0.112608	0.113571	0.113571	0.12127	0.120308
	13	0.123195	0.123195	0.122233	0.12127	0.120308	0.12127	0.114533	0.111646	0.111646	0.112608	0.114533	0.111646	0.108758	0.106833	0.107796	0.113571	0.113571
	14		0.12512	0.122714	0.121752	0.119346	0.118383	0.114533	0.110683	0.110683	0.108758	0.108758	0.107796	0.105871	0.104909	0.106833	0.107796
	15			0.119346	0.119346	0.117421	0.116458	0.114533	0.110683	0.108758	0.107796	0.106833	0.105871	0.104909	0.103946	0.10539
	16				0.116458	0.116458	0.113571	0.112608	0.109721	0.107796	0.107796	0.106833	0.105871	0.104909	0.104909
	17					0.114533	0.114533	0.110683	0.10924	0.108758	0.107796	0.107796	0.106833	0.106352
5	1					0.14052	0.142445	0.142445	0.135707	0.127045	0.126083	0.127045	0.127045						5																		5
	2					0.137632	0.135707	0.13667	0.13667	0.131858	0.133782	0.129933	0.131858	0.130895
	3			0.12897	0.133782	0.13282	0.13282	0.131858	0.13282	0.132339	0.129933	0.129933	0.129933	0.131858	0.129933
	4		0.12127	0.122233	0.126083	0.12897	0.130895	0.129933	0.131858	0.13282	0.130895	0.12897	0.128008	0.127045	0.127045	0.126083
	5	0.120308	0.12127	0.123195	0.124158	0.127045	0.12897	0.129933	0.129933	0.133301	0.133782	0.129933	0.128008	0.126083	0.126083	0.124158	0.123195
	6	0.119346	0.120308	0.122233	0.124158	0.126083	0.127045	0.128008	0.128008	0.12897	0.131858	0.130414	0.126564	0.124639	0.123195	0.122233	0.12127	0.118383
	7	0.119346	0.119346	0.118383	0.117421	0.117421	0.119346	0.124158	0.127045	0.128008	0.131858	0.130895	0.126083	0.124158	0.126083	0.122233	0.12127	0.117421
	8	0.119346	0.118383	0.117421	0.116458	0.115496	0.116458	0.116458	0.120308	0.126083	0.129451	0.131858	0.127045	0.122233	0.126083	0.12127	0.119346	0.117421
	9	0.119346	0.118383	0.117421	0.116458	0.115496	0.115496	0.115496	0.116458	0.118383	0.123195	0.12897	0.131376	0.124158	0.122233	0.120308	0.117421	0.116458
	10	0.123195	0.122233	0.118383	0.116458	0.115496	0.116458	0.116458	0.113571	0.115496	0.116458	0.12127	0.123195	0.124158	0.122233	0.119346	0.117421	0.117421
	11	0.12897	0.124158	0.120308	0.118383	0.118383	0.117421	0.114533	0.113571	0.116458	0.118383	0.118383	0.117421	0.118383	0.122233	0.119346	0.118383	0.117421
	12	0.12512	0.122233	0.119346	0.119346	0.117421	0.118383	0.114533	0.112608	0.114533	0.115496	0.113571	0.110683	0.109721	0.108758	0.112608	0.118864	0.117421
	13	0.124158	0.124158	0.122233	0.120308	0.121752	0.12127	0.11309	0.110683	0.110683	0.110683	0.111646	0.107796	0.104909	0.105871	0.106833	0.109721	0.110683
	14		0.12512	0.122233	0.123195	0.120308	0.115496	0.113571	0.109721	0.107796	0.108277	0.106833	0.105871	0.104909	0.105871	0.105871	0.106833
	15			0.119346	0.116939	0.115496	0.115496	0.113571	0.109721	0.107796	0.107796	0.106833	0.104909	0.104909	0.103946	0.104909
	16				0.113571	0.113571	0.113571	0.111646	0.108758	0.106833	0.106833	0.105871	0.103946	0.103946	0.103946
	17					0.113571	0.112608	0.110683	0.108758	0.108758	0.107796	0.105871	0.104909	0.104909
6	1					0.138595	0.14052	0.142445	0.135707	0.127045	0.12512	0.128008	0.127526						6																		6
	2					0.13667	0.135707	0.13667	0.13667	0.130895	0.131858	0.131376	0.131858	0.13282
	3			0.129933	0.13282	0.133782	0.133782	0.133782	0.135707	0.133782	0.129933	0.128008	0.131858	0.134745	0.131858
	4		0.12127	0.123195	0.125602	0.130895	0.130895	0.130895	0.133782	0.134745	0.131858	0.128489	0.128008	0.128008	0.128008	0.127045
	5	0.119346	0.119346	0.122233	0.124158	0.12897	0.130895	0.130895	0.13282	0.135707	0.134745	0.131858	0.127045	0.126083	0.12512	0.123195	0.123195
	6	0.117421	0.118864	0.122233	0.12127	0.122233	0.126083	0.12897	0.12897	0.130895	0.13667	0.13282	0.128008	0.126083	0.124158	0.121752	0.12127	0.119346
	7	0.118383	0.117421	0.117421	0.115496	0.115496	0.117902	0.122233	0.128008	0.12897	0.133782	0.13282	0.127045	0.126083	0.12512	0.122233	0.120308	0.118383
	8	0.119346	0.116458	0.115977	0.114533	0.114533	0.116458	0.118383	0.120789	0.127045	0.130895	0.13282	0.128008	0.12512	0.126083	0.12127	0.12127	0.118383
	9	0.119346	0.116458	0.115496	0.113571	0.114533	0.116458	0.116458	0.118383	0.119827	0.124158	0.130895	0.131858	0.12512	0.123195	0.12127	0.120308	0.120308
	10	0.122233	0.121752	0.116939	0.114533	0.115977	0.116458	0.116458	0.116458	0.117421	0.118383	0.122233	0.124158	0.124158	0.123195	0.120308	0.119346	0.119346
	11	0.130895	0.12512	0.119346	0.117421	0.117421	0.118383	0.116458	0.115496	0.118383	0.120308	0.120308	0.119346	0.119346	0.120308	0.12127	0.120308	0.119346
	12	0.126083	0.12127	0.120308	0.120308	0.118383	0.119346	0.116458	0.115496	0.118383	0.119346	0.117421	0.113571	0.112608	0.110683	0.113571	0.119346	0.118383
	13	0.12512	0.124158	0.123195	0.123195	0.123195	0.12127	0.114533	0.112608	0.113571	0.111646	0.112608	0.108758	0.106833	0.107796	0.106833	0.112608	0.112608
	14		0.12897	0.124158	0.12512	0.120308	0.116458	0.113571	0.111646	0.109721	0.108758	0.106833	0.105871	0.105871	0.104909	0.105871	0.106833
	15			0.119346	0.118383	0.118383	0.115496	0.113571	0.110683	0.107796	0.107796	0.106833	0.104909	0.103946	0.103946	0.104909
	16				0.115496	0.115496	0.114533	0.112608	0.109721	0.107796	0.106833	0.106833	0.104909	0.104909	0.103946
	17					0.115496	0.112127	0.109721	0.107796	0.107796	0.108758	0.106833	0.106833	0.106833
7	1					0.138114	0.139557	0.139557	0.134745	0.128008	0.127045	0.128008	0.128008						7																		7
	2					0.13667	0.133782	0.134745	0.133782	0.129933	0.131858	0.131858	0.130895	0.129933
	3			0.127526	0.131858	0.131858	0.13282	0.133782	0.13282	0.129933	0.127045	0.127045	0.12897	0.129933	0.129933
	4		0.119346	0.120308	0.12512	0.129933	0.129933	0.130895	0.131858	0.131858	0.12897	0.126083	0.126083	0.127045	0.127045	0.126564
	5	0.118383	0.120308	0.12127	0.124158	0.128008	0.130895	0.130895	0.131858	0.133301	0.131858	0.128008	0.126083	0.124158	0.124158	0.123195	0.123195
	6	0.117421	0.118383	0.120789	0.123195	0.12512	0.12897	0.12897	0.128008	0.129933	0.131858	0.12897	0.126083	0.123195	0.123195	0.12127	0.120308	0.120308
	7	0.116458	0.117421	0.117421	0.117421	0.115496	0.117421	0.123195	0.127045	0.129933	0.131376	0.130895	0.126083	0.124158	0.12512	0.122233	0.120308	0.118383
	8	0.118383	0.118383	0.116458	0.114533	0.114533	0.115496	0.116458	0.119346	0.126083	0.130895	0.131858	0.127045	0.122233	0.126083	0.120308	0.118383	0.116458
	9	0.119346	0.117421	0.115496	0.114533	0.113571	0.115496	0.115496	0.116458	0.118383	0.121752	0.12897	0.130895	0.122714	0.120789	0.119827	0.119346	0.117421
	10	0.122233	0.12127	0.116458	0.115496	0.114533	0.115496	0.114533	0.113571	0.114533	0.115496	0.120308	0.122233	0.12127	0.122233	0.119346	0.116458	0.117421
	11	0.127526	0.124158	0.120308	0.118383	0.116458	0.117421	0.114533	0.112608	0.117421	0.119346	0.120308	0.118383	0.117421	0.119827	0.119346	0.118383	0.117421
	12	0.12512	0.120308	0.119346	0.119346	0.117421	0.117421	0.115496	0.114533	0.118383	0.118383	0.117421	0.113571	0.112608	0.111646	0.112608	0.118383	0.119346
	13	0.124158	0.123195	0.122233	0.123195	0.123195	0.123195	0.112608	0.109721	0.111165	0.111646	0.113571	0.110683	0.107796	0.108758	0.108758	0.111646	0.110683
	14		0.128008	0.123195	0.122233	0.120308	0.116458	0.113571	0.110683	0.108758	0.110683	0.108758	0.108758	0.105871	0.107796	0.108758	0.108758
	15			0.119346	0.118383	0.118383	0.115496	0.113571	0.110683	0.108758	0.108758	0.108758	0.107796	0.106833	0.106833	0.105871
	16				0.114533	0.114533	0.114533	0.112608	0.110683	0.108758	0.107796	0.106833	0.106833	0.106833	0.105871
	17					0.113571	0.111646	0.109721	0.107796	0.107796	0.107796	0.107796	0.107796	0.106833
8	1					0.137632	0.137632	0.137632	0.13667	0.129933	0.12897	0.12897	0.129933						8																		8
	2					0.135707	0.133782	0.134745	0.134745	0.131858	0.13282	0.130895	0.13282	0.134745
	3			0.128008	0.131376	0.131858	0.130895	0.130895	0.131858	0.13282	0.129933	0.129933	0.130895	0.131858	0.131858
	4		0.120308	0.122233	0.126083	0.129933	0.129933	0.129933	0.129933	0.13282	0.131858	0.12897	0.129933	0.129933	0.12897	0.129933
	5	0.120308	0.12127	0.122233	0.12512	0.12897	0.130895	0.12897	0.129933	0.130895	0.133782	0.130895	0.129933	0.129933	0.128008	0.124158	0.124158
	6	0.118383	0.120308	0.12127	0.12512	0.12512	0.129933	0.12897	0.128008	0.129933	0.13282	0.129933	0.127045	0.128008	0.126083	0.123195	0.122233	0.12127
	7	0.118383	0.119346	0.118383	0.118383	0.117421	0.12127	0.124158	0.127045	0.128008	0.130895	0.131858	0.127045	0.127045	0.127045	0.123195	0.123195	0.120308
	8	0.119346	0.118383	0.116939	0.117421	0.117421	0.118383	0.119346	0.122233	0.127045	0.131858	0.133782	0.128008	0.124158	0.127045	0.123195	0.120308	0.120308
	9	0.12127	0.118383	0.117421	0.117421	0.116458	0.118383	0.118383	0.118383	0.12127	0.124158	0.131858	0.13282	0.124158	0.123195	0.12127	0.12127	0.118383
	10	0.126564	0.123195	0.117421	0.116458	0.115977	0.118383	0.117421	0.116458	0.117421	0.119346	0.122233	0.12512	0.123195	0.123195	0.12127	0.118383	0.117902
	11	0.129933	0.124158	0.121752	0.118383	0.117421	0.118383	0.117421	0.116458	0.119346	0.12127	0.12127	0.120308	0.119827	0.12127	0.122233	0.120308	0.119346
	12	0.124158	0.123195	0.120308	0.120308	0.117421	0.119346	0.118383	0.117421	0.119346	0.120308	0.116458	0.113571	0.114533	0.113571	0.112608	0.120308	0.119346
	13	0.12127	0.124158	0.123195	0.123195	0.123195	0.122233	0.116458	0.113571	0.112608	0.113571	0.114533	0.112608	0.108758	0.108758	0.107796	0.113571	0.114533
	14		0.126083	0.123195	0.122714	0.120308	0.117421	0.115496	0.112608	0.110683	0.111646	0.110683	0.109721	0.108758	0.107796	0.108758	0.109721
	15			0.119346	0.118383	0.117902	0.116458	0.115496	0.112608	0.111646	0.109721	0.10924	0.108758	0.107796	0.108758	0.108758
	16				0.116458	0.117421	0.116458	0.114533	0.110683	0.110683	0.110683	0.108758	0.108758	0.109721	0.107796
	17					0.115496	0.114533	0.111646	0.110683	0.110683	0.110683	0.110683	0.108758	0.109721
9	1					0.138595	0.141482	0.137632	0.13282	0.126083	0.126083	0.127045	0.126083						9																		9
	2					0.13667	0.134745	0.13667	0.133782	0.129933	0.13282	0.12897	0.129933	0.131858
	3			0.129933	0.13282	0.131858	0.13282	0.131858	0.133782	0.13282	0.128008	0.12897	0.12897	0.130895	0.129933
	4		0.118383	0.120308	0.126083	0.12897	0.129933	0.129933	0.131858	0.133782	0.129933	0.126083	0.126083	0.126083	0.12512	0.12512
	5	0.115496	0.118383	0.12127	0.124158	0.128008	0.12897	0.129933	0.130414	0.131858	0.133301	0.128008	0.126083	0.124158	0.124158	0.122233	0.122714
	6	0.115496	0.117421	0.119346	0.12127	0.123195	0.124158	0.127045	0.127045	0.129451	0.13282	0.129933	0.126083	0.124158	0.123195	0.12127	0.122233	0.120308
	7	0.115496	0.115977	0.115496	0.113571	0.112608	0.115496	0.120308	0.12512	0.128008	0.131376	0.130895	0.12512	0.123195	0.124158	0.123195	0.122233	0.120308
	8	0.118383	0.115496	0.113571	0.111646	0.110683	0.112608	0.114533	0.118383	0.127045	0.129933	0.13282	0.127045	0.122233	0.12512	0.123195	0.12127	0.120308
	9	0.118383	0.115496	0.114533	0.112608	0.110683	0.112608	0.111646	0.114533	0.117902	0.123195	0.128008	0.129933	0.124158	0.120308	0.120308	0.118383	0.119346
	10	0.122233	0.119346	0.115496	0.113571	0.112608	0.113571	0.113571	0.112608	0.113571	0.115496	0.118383	0.12127	0.122233	0.120308	0.119346	0.118383	0.118383
	11	0.127045	0.123195	0.117421	0.115496	0.115496	0.114533	0.114533	0.111646	0.114533	0.117421	0.118383	0.116458	0.117421	0.120308	0.119346	0.118383	0.118383
	12	0.123195	0.120308	0.117421	0.116458	0.115977	0.115496	0.113571	0.112608	0.115496	0.115496	0.112608	0.111646	0.109721	0.111646	0.111646	0.117421	0.117421
	13	0.12127	0.12127	0.12127	0.12127	0.120308	0.120308	0.110683	0.108758	0.109721	0.108758	0.110683	0.108758	0.103946	0.103946	0.104909	0.108758	0.109721
	14		0.12512	0.122233	0.122233	0.120308	0.116458	0.111646	0.109721	0.106833	0.107796	0.104909	0.104909	0.102984	0.102502	0.102021	0.104909
	15			0.117421	0.117421	0.116458	0.115496	0.112608	0.109721	0.106833	0.106833	0.104909	0.102984	0.102021	0.102984	0.102021
	16				0.114533	0.113571	0.112608	0.109721	0.106833	0.104909	0.104909	0.103946	0.102021	0.102984	0.102021
	17					0.112608	0.110683	0.108758	0.106833	0.104909	0.104909	0.103946	0.102984	0.102984
10	1					0.135707	0.138595	0.139557	0.131858	0.127045	0.126083	0.126564	0.126083						10																		10
	2					0.13282	0.131858	0.13282	0.13282	0.127045	0.128008	0.128008	0.12897	0.129933
	3			0.126083	0.12897	0.12897	0.129933	0.129933	0.130895	0.130414	0.126083	0.126083	0.126083	0.129451	0.12897
	4		0.119346	0.120308	0.124158	0.127526	0.128008	0.12897	0.129933	0.129933	0.127526	0.12512	0.124158	0.126083	0.126083	0.12512
	5	0.119346	0.119346	0.120308	0.123195	0.126083	0.128008	0.12897	0.129933	0.129451	0.12897	0.126083	0.12512	0.123195	0.124158	0.122233	0.121752
	6	0.117421	0.118383	0.119346	0.122233	0.122233	0.126083	0.126083	0.127045	0.126083	0.12897	0.128008	0.123195	0.122233	0.123195	0.123195	0.122233	0.117421
	7	0.118383	0.117421	0.115496	0.115496	0.113571	0.116458	0.120308	0.123195	0.127045	0.128008	0.128008	0.123195	0.123195	0.124158	0.122233	0.12127	0.116458
	8	0.118383	0.117421	0.115496	0.114533	0.112608	0.114533	0.115496	0.118383	0.123195	0.12897	0.129933	0.124158	0.12127	0.124158	0.122233	0.118383	0.118383
	9	0.119346	0.116458	0.115496	0.114533	0.113571	0.113571	0.114533	0.114533	0.115496	0.12127	0.128008	0.12897	0.122233	0.120308	0.118383	0.118383	0.117421
	10	0.122233	0.119827	0.114533	0.114533	0.114533	0.114533	0.114533	0.115496	0.116458	0.116458	0.119346	0.120308	0.118383	0.12127	0.118383	0.116458	0.116458
	11	0.12512	0.12127	0.118383	0.116939	0.115496	0.114533	0.115496	0.113571	0.117421	0.117421	0.118383	0.117421	0.116458	0.117421	0.118383	0.117421	0.117421
	12	0.122233	0.119346	0.117421	0.117421	0.116458	0.117421	0.115496	0.113571	0.115977	0.117421	0.113571	0.110683	0.109721	0.109721	0.111646	0.117421	0.117421
	13	0.120308	0.12127	0.120308	0.120308	0.120308	0.119346	0.111646	0.108758	0.108758	0.109721	0.110683	0.106833	0.104909	0.104909	0.104909	0.109721	0.109721
	14		0.124158	0.12127	0.12127	0.116458	0.112608	0.110683	0.108758	0.105871	0.106833	0.104909	0.104909	0.103946	0.102984	0.103946	0.103946
	15			0.115977	0.112608	0.113571	0.110683	0.110683	0.106833	0.105871	0.105871	0.103946	0.103946	0.102984	0.102021	0.102984
	16				0.109721	0.111646	0.112608	0.109721	0.105871	0.10539	0.103946	0.103946	0.102984	0.102984	0.102984
	17					0.110683	0.109721	0.107796	0.106833	0.104909	0.104909	0.103946	0.103946	0.103946

## Sheet: DISS
MaxDissociation
Signals of insufficient quality were excluded from the property maps. Signals could be rejected based on noise low amplitude, large artefact or ventricluar farfields that could not be substracted.
		1	2	3	4	5	6	7	8	9	10	11	12	13	14	15	16	17
1	1					21.0093	27.3079	33.2414	39.8716	37.152	33.4902	26.969	19.8982						1																		1
	2					30.7659	33.4685	36.7808	42	40.9297	38.6174	37.0923	35.4723	34.4356
	3			20.5668	28.7055	28.0154	26.9822	28.2794	30.125	30.0495	32.3053	32.1604	32.3296	31.1236	25.8761
	4		20.6948	25.2381	27.1083	29.3434	27.3529	24.9913	28.3038	30.2483	28.8509	25.2876	21.8935	22.2266	19.7857	17.9192
	5	16.3755	22.0247	26.1245	29.6694	33.9766	32.222	29.5594	29.6812	30.7445	30.7285	27.718	21.6328	18.8836	17.0688	16.1966	16.6099
	6	17.6808	25.137	28.0744	31.9812	33.734	34.4461	33.6427	31.5424	31.0671	31.8537	29.2237	22.8922	18.5842	16.4893	16.2064	16.0482	13.4292
	7	20.0423	25.1781	27.1883	27.5817	27.4669	29.3224	32.3921	32.0168	31.9617	33.6867	29.7904	25.2946	19.5203	19.0764	18.2767	18.2672	14.382
	8	22.3088	25.6325	22.596	20.2332	19.705	22.5529	26.8893	30.1077	33.3291	36.4735	36.452	32.1996	25.661	21.947	20.3684	17.2568	13.4855
	9	23.1979	26.2278	23.548	19.4464	18.2303	19.7222	21.1213	24.2285	29.2793	34.2821	38.5163	37.7706	31.5032	24.6987	20.5658	16.0082	10.8683
	10	26.8468	29.3996	25.122	21.7873	20.8376	22.6201	19.8802	20.3808	22.33	27.3394	33.0725	35.0526	32.7305	25.9854	21.071	13.3552	8.88041
	11	29.5	32.5	27.7439	24.096	23.2445	24.5575	22.574	20.6161	22.3996	25.3455	29.4024	29.4008	28.8086	27.7908	25.0432	18.1876	11.4763
	12	28.3048	30.5635	26.8704	23.6498	26.7171	30.0902	28.8829	27.1633	28.1199	28.4442	26.4048	25.2846	24.444	26.5917	25.754	22.2263	18.205
	13	22.6971	29.9502	27.4283	26.1762	30.1405	32.7303	29.6373	27.8209	27.0388	26.6712	24.4133	21.3398	18.9981	16.8168	19.1382	16.714	14.996
	14		28.6149	28.4025	28.6326	30.6536	30.1402	26.9841	23.4569	20.6069	21.8652	20.9865	18.6212	15.5473	11.8741	10.557	8.89374
	15			28.248	27.8676	29.9758	25.9064	25.1183	22.033	19.2162	18.8282	17.1034	14.1281	12.4915	8.87856	7.09905
	16				22.7984	26.0157	26.3588	23.1909	21.0891	17.5048	16.2176	14.4838	12.5479	11.2324	9.49811
	17					21.5265	21.3141	17.595	15.2147	12.7101	11.2161	9.94402	9.67557	9.15429
2	1					17.6939	24.5128	32.1057	38.4118	36.3244	32.896	25.4327	16.9336						2																		2
	2					30.3447	31.8186	35.8549	42.181	40.9692	39.0722	37.4641	35.405	34.4831
	3			21.0043	29.9652	29.3033	28.3244	28.1463	29.7121	30.8248	33.9784	32.7689	32.6928	31.3186	28.0377
	4		20.236	26.3781	26.692	29.0108	25.0746	23.9935	26.13	27.6976	27.3114	25.2115	22.2821	21.7692	21.083	18.9313
	5	15.189	21.0945	25.1072	29.1614	32.8384	31.0345	29.4069	27.6124	29.4957	29.7297	27.9805	23.1023	19.1314	18.7315	17.0669	15.9053
	6	15.6883	22.5732	26.7963	30.6757	33.4121	35.4301	34.4946	30.9406	30.7158	31.0857	29.8606	26.5581	20.2848	18.6189	16.2261	15.0248	12.5909
	7	18.3935	23.4266	25.0563	24.9719	27.0909	29.8241	31.8776	31.3117	33.2927	33.3427	32.4539	29.4283	23.0042	21.3248	18.0188	17.4701	13.7755
	8	20.6477	23.5478	21.9921	19.1476	19.1468	21.7	25.517	29.4545	34.0441	37.1104	38.8831	34.6277	27.1897	23.4697	21.5252	18.4684	14.3105
	9	21.6041	24.49	21.3135	18.4334	17.7964	20.4722	20.7275	24.2435	29.7333	34.8168	38.8122	39.4097	31.4277	24.5227	20.7612	15.8178	11.7551
	10	26.0693	28.6175	24.006	20.3519	20.5976	21.7826	20.7072	19.5079	22.6818	28.0364	32.0622	33.3771	30.1432	24.8148	20.2667	13.2198	8.77823
	11	28.0427	30.9417	26.6619	23.0723	23.747	25.2495	24.3805	20.7008	23.7654	26.7414	28.0876	29.4859	28.0259	28.2368	26.0988	19.694	12.5351
	12	25.7713	29.6646	25.5497	24.0957	26.1045	30.2616	30.3777	27.3937	28.9761	29.3228	27.627	25.9981	24.4759	25.7432	25.5591	22.3481	16.7315
	13	22.0292	26.1247	25.893	26.6708	28.7248	31.6816	29.3829	27.0431	27.0463	26.7079	24.556	21.4023	17.866	17.0192	19.2096	15.037	13.8173
	14		26.7945	26.1464	27.7137	29.0507	28.906	27.8071	23.4449	20.7505	21.8805	19.8874	18.2235	15.0832	11.7962	10.2849	8.91346
	15			25.1022	25.626	27.6145	25.7165	24.3602	21.9941	19.4932	18.9155	17.5817	15.351	13.6376	10.0439	7.44571
	16				21.7743	25.1968	25.4097	22.5857	20.6909	18.0897	16.499	15.376	13.327	12.6591	9.75094
	17					19.8631	20.7364	17.5	15.5605	14.8066	12.7674	11.059	10.9312	10.4855
3	1					21.1429	27.5865	33.8504	40.051	37.1879	34.2873	26.5022	17.6104						3																		3
	2					32.4489	34.4781	37.0681	42.4578	42.8362	40.8391	38.4806	36.3562	32.8004
	3			22.936	30.0151	29.8341	30.0564	30.269	31.1601	31.2891	33.6996	32.8868	32.9131	30.0626	25.6946
	4		21.8182	27.8535	29.6613	31.5612	29.4362	26.7761	28.3848	29.779	28.6086	25.8837	21.717	21.0149	19.1811	18.28
	5	17.7282	23.359	27.8698	33.4205	35.4835	34.3129	30.7669	29.117	30.4261	31.4859	27.1389	22.6618	19.9833	17.9959	16.5496	17.0247
	6	18.2229	26.2282	30.4127	35.1469	36.1996	36.6894	34.4175	32.5126	32.0424	32.5835	29.9509	26.4747	20.7785	17.2562	15.3719	16.0433	15.0735
	7	19.5596	24.7004	29.0116	29.7049	29.0749	29.9825	31.9514	32.2825	33.416	33.4323	32.095	29.4684	22.2754	18.65	17.1573	16.967	15.4633
	8	23.7323	26.8054	26.242	24.307	22.1313	23.1467	27.1622	30.7807	34.1508	36.5726	37.6291	35.3425	27.9317	22.3091	20.0187	18.1296	14.9753
	9	24.8693	28.1808	25.0932	22.5245	21.2387	21.4781	23.1036	25.9496	30.7618	32.6524	39.7669	39.8272	31.417	24.6095	21.137	16.5246	12.3435
	10	27.6448	32.1126	26.5058	23.8858	22.5312	23.5019	22.6929	20.5676	23.2805	27.446	33.1295	34.8354	29.1524	23.4753	20.7485	14.1687	9.28106
	11	30.4725	33.6763	30.2642	26.5295	25.4828	26.5116	24.632	21.9542	23.4238	27.0177	29.6976	28.524	27.259	26.9919	25.4684	19.3225	11.6843
	12	29.0469	32.4185	28.8644	26.1387	27.3372	30.3562	29.3699	27.5895	27.9201	28.823	28.1324	26.1156	25.1689	25.4047	25.1316	21.0244	16.6303
	13	24.2621	30.428	29.0734	28.644	31.6815	33.3306	31.9942	26.9924	25.4848	26.8298	25.1663	21.2076	18.043	17.9055	18.3157	15.9119	13.5981
	14		28.1017	29.1772	28.937	30.5172	29.3471	28.7977	24	21.8885	23.351	20.9358	19.1576	16.2623	12.5093	10.3459	9.40341
	15			27.964	28.5368	30.5635	28.1238	25.8885	23.3008	20.4012	20.2596	18.183	15.6698	14.9184	10.243	8.02239
	16				23.5484	26.8069	27.8511	23.8577	21.9336	19.4449	18.0841	16.8125	14.2453	13.5186	11.2329
	17					21.3263	21.3791	18.2763	16.2533	14.7695	12.8788	11.3038	11.3333	10.3959
4	1					18.7941	26.1565	32.3461	39.5546	37.0238	34.3177	28.1906	20.8294						4																		4
	2					29.448	32.0112	35.8491	42.0998	41.8196	39.7669	38.3978	38.0108	36.2565
	3			21.2463	29.6867	28.0409	27.063	28.5076	29.9651	30.4619	31.4925	31.8777	33.119	31.1481	26.5129
	4		19.3783	24.8117	27.383	28.3235	25.4328	24.8013	28.8205	30.2652	29.6438	25.7149	22.8565	21.1818	19.4588	16.616
	5	15.3545	20.2705	25.1288	28.9448	31.1375	30.1401	29.3206	29.8917	31.5983	31.5431	28.6892	24.1604	20.3687	16.8075	15.3768	14.4815
	6	16.1179	23.2072	27.8149	32.0625	33.0162	34.8436	33.578	31.861	32.5456	33.5107	30.2367	24.6506	21.1701	18.8536	16.3717	16.1721	13.251
	7	18.8004	23.9921	27.1316	27.5592	27.2031	30.0136	32.2449	33.3094	34.2804	33.5556	33.4957	27.4864	22.1918	20.3958	18.7078	17.5833	14.4509
	8	21.9301	25.2787	23.3437	21.5774	21.8442	24.6486	28.2885	31.5249	34.8021	37.4517	38.0857	34.3004	26.8371	23.7004	20.8583	17.513	14.7505
	9	24.924	28.1537	23.4537	20.9923	20.6486	22.3885	22.4636	25.711	31.432	37.0392	39.7792	38.633	30.3395	25.2057	21.996	15.76	10.251
	10	27.6116	31.398	26.9503	23.5777	22.4311	22.8865	21.2353	21.4061	25.472	29.8425	33.3266	34.868	30.7061	25.2688	21.366	13.1292	8.66998
	11	30.1356	33.1828	28.8856	24.6929	24.5087	25.8726	24.782	22.2998	24.9152	26.8317	28.2972	29.4892	27.1925	27.5152	26.3936	20.257	12.2954
	12	27.4216	31.3078	27.6739	24.9332	25.8552	30.6408	30.1409	26.1379	27.6369	27.5623	27.0695	25.1768	23.7433	26.3645	26.7404	22.49	17.714
	13	22.2215	28.3449	27.0744	27.1014	29.0501	32.1753	30.8229	26.7416	27.3414	27.2411	25.5939	22.0038	18.2889	17.5046	19.4228	16.5308	15.058
	14		27.5922	28.487	29.1093	30.5239	30.6876	28.471	23.1407	21.8271	23.0579	21.5892	18.6004	15.4642	12.4208	10.9197	9.87085
	15			27.9485	28.3228	29.7461	28.7471	25.499	23.1902	20	20.5904	18.3015	14.9273	13.375	10.5425	8.16152
	16				23.4333	27.3673	27.5085	24.4716	21.552	18.3309	17.6218	16.2308	13.9728	13.0543	10.1
	17					22.5897	23.9259	18.5441	15.6462	13.8862	12.4621	11.6419	11.0702	10.375
5	1					19.8109	25.7362	33.7312	39.4659	35.7366	31.6928	25.7473	18.5383						5																		5
	2					29.6823	31.5089	36.7478	42.459	40.7722	38.2418	36.8728	34.3551	32.581
	3			22.0527	29.8391	28.4946	27.3565	28.0174	30.9457	32.1204	32.7834	33.1677	32.2244	29.9637	25.5516
	4		20.634	26.0121	28.2872	30.0126	26.9809	24.9916	27.7811	30.5837	29.5289	25.7055	21.7929	20.4676	19.9423	18.3113
	5	15.0558	20.6203	25.0924	28.3671	31.7344	31.5613	29.3179	29.5924	31.5398	32.651	28.678	24.3285	20.0514	18.4012	16.2383	16.1559
	6	16.2213	22.5159	26.255	31.1293	34.0658	35.4033	32.8498	31.1767	32.0231	33.7119	31.5669	25.7826	21.0226	18.2337	16.5354	15.3788	12.9078
	7	16.3268	21.5	24.5984	25.5737	26.8225	30.74	32.432	32.1809	33.1349	33.822	32.8098	29.064	21.8354	19.4318	17.8949	16.875	13.6879
	8	18.4872	22.4911	21.416	20.7408	21.4981	24.9553	28.1265	30.3548	32.6414	36.9186	37.8504	34.6266	27.1048	23.2866	21.6714	17.14	13.5945
	9	20.3953	24.1471	22.1348	20.5388	21.8671	22.3444	22.686	25.5888	30.2106	34.4806	39.0084	37.3389	30.9082	26.8081	23.1093	16.7417	10.7859
	10	25.0963	29.328	25.4451	21.7209	22.5637	23.3992	21.4922	20.5344	24.3721	28.5814	33.9303	34.2788	30.8882	26.2545	22.5575	14.3674	8.90927
	11	29.5401	32.2531	28.4751	24.0528	24.7241	26.8745	24.119	22.5564	25.3942	27.9155	30.1602	29.6621	28.751	29.9307	26.1634	18.2431	10.6016
	12	30.234	32.8056	27.4693	25.6344	26.8889	31.7446	29.1574	26.6495	29.295	29.0656	28.2852	26.5296	25.829	25.7318	26.3472	21.6208	17.0255
	13	24.3022	30.8097	28.123	27.3762	31.1916	32.6461	29.299	27.3652	28.3067	28.0019	25.5962	20.5349	17.5045	18.0839	18.5515	16.2614	14.3697
	14		29.4107	29.396	29.5449	30.9644	30.1511	27.9885	24.0074	22.6581	23.8701	21.326	18.5327	14.927	12.1087	11.5586	10.2175
	15			29.1434	28.117	29.3435	27.263	26.4837	23.5065	19.9002	20.1796	18.3738	15.3535	14.0841	10.1284	7.47349
	16				22.9564	25.8204	26.6635	24.8748	22.1243	18.7569	17.0055	15.1588	14.0236	12.9873	10.5423
	17					20.6264	21.9721	19.2625	16.4495	14.7408	12.6365	11.223	10.7855	10.9325
6	1					19.1171	25.2032	29.3659	38.3472	35.5772	31.7113	25.8136	19.9133						6																		6
	2					29.7677	31.42	33.3902	40.714	39.3047	38.8182	36.985	34.9199	32.2323
	3			21.864	29.0366	29.29	28.6608	28.287	29.2088	28.3515	31.6242	31.7246	31.1325	29.449	25.1481
	4		20.6968	25.6701	26.3395	29.7257	27.3205	25.9032	27.9244	29.4902	27.363	24.0994	22.0921	22.0317	20.2672	18.4354
	5	15.3241	20.7112	24.5142	28.4184	32.9146	32.2326	28.911	30.2842	30.8304	29.9825	27.3319	22.7641	19.6853	18.8678	17.5628	17.2632
	6	15.2682	22.0376	26.8717	30.224	32.7014	34.6053	33.1369	31.1691	30.879	31.9717	29.0989	24.3098	19.9526	18.5275	17.008	15.502	13.0218
	7	16.4409	22.0235	24.1591	24.6082	25.7324	29.6509	31.8367	31.5714	33.4582	32.9122	32.0192	26.7568	20.6299	20.0894	17.2048	15.6986	13.0217
	8	19.6126	22.9295	22.0619	20.2841	20.8225	23.6117	27.3597	30.3327	34.0744	36.5063	37.4397	33.1979	25.0265	21.0671	19.4405	16.4232	12.6389
	9	22.2185	25.2568	23.6628	20.7467	20.5973	21.4566	21.0799	23.6928	28.8303	34.2735	38.6292	37.7932	29.4939	24.5611	20.4861	14.4742	10.3745
	10	26.3185	30.8663	26.0078	21.9884	21.8791	22.3103	19.572	18.8757	22.7207	28.7002	32.1187	33.3089	29.303	24.2791	20.2883	12.4453	8.9127
	11	28.375	32.4743	28.8079	24.6	24.4756	25.7797	22.9591	20.2893	22.4168	26.2194	28.2122	28.0851	27.389	27.2618	23.6865	17.5777	10.49
	12	25.11	29.43	25.5296	24.3042	26.0416	30.1859	28.0907	25.5347	27.4238	27.602	26.5262	24.8939	24.8906	25.8662	24.195	20.1437	15.4438
	13	20.7536	26.9919	25.583	25.3823	28.8259	31.7335	29.9273	26.5	25.8528	25.6704	24.1297	21.81	19.0544	17.848	17.2694	15.2216	13.0324
	14		27.1971	27.2287	27.5931	29.516	29.4786	28.5733	24.6903	22.8224	23.0867	20.462	19.1139	16.7939	12.5658	11.2847	9.89512
	15			26.9743	26.435	29.0893	27.9072	26.8257	23.9756	20.3358	20.1657	18.4107	15.5699	15.5223	10.6268	8.27046
	16				22.8621	27.4444	28.3849	25.1313	22.3061	18.0717	16.7094	15.8025	14.1293	13.1835	10.8004
	17					22.0379	23.1043	19.9158	16.7088	14.3539	12.1349	11.1752	10.7495	10.3582
7	1					21.8571	27.2829	33.2528	39.281	34.9277	32.2866	25.5191	19.1292						7																		7
	2					31	33.4283	36.4022	39.9781	38.3681	37.1288	36.1844	35.6137	33.4883
	3			22.1423	30.3483	29.9784	28.5761	27.7664	28.7348	28.9893	31.135	31.1271	31.6513	28.9386	23.928
	4		20.2436	25.0179	28.6082	31.3763	27.6525	24.4561	25.7559	27.9784	27.7076	24.7645	23.0393	21.0352	18.7787	16.6326
	5	15.3536	20.7949	26.3618	30.3775	34.251	33.4873	29.1332	26.9227	28.5119	29.0278	27.5607	24.3155	19.9772	17.9816	15.82	16.1629
	6	15.6491	23.0845	26.5229	31.716	35.7093	37.3292	34.7161	30.0438	28.2611	30.0235	28.8776	24.8967	20.8126	17.2572	16.2403	14.6914	12.1597
	7	17.6874	22.0411	25.4288	26.3762	27.2194	31.2919	33.3239	32.1093	33.0335	32.9172	31.1702	27.3698	20.5697	19.3409	17.6404	16.264	13.0554
	8	20.9765	24.0568	21.818	20.8369	19.3064	23.0482	26.6152	31.495	34.3047	37.1326	37.4534	33.5	25.7561	22.6953	19.894	17.336	13.5538
	9	23.2931	25.6043	22.675	19.567	19.1445	21.0154	22.0519	24.3569	29.9147	34.0626	39.2833	36.9703	29.5051	25.7034	22.1263	16.2306	11.3164
	10	25.5671	28.9202	25.1938	21.8	21.7663	22.1288	21.2753	19.5665	21.7572	27.53	32.6447	33.3684	29.448	25.522	21.9644	13.407	9.09412
	11	28.4262	30.7975	27.8546	23.7524	24.5253	25.4412	24.8681	20.9094	23.1868	25.5276	28.3976	27.8725	27.1663	27.0217	25.1339	18.902	11.7754
	12	24.7163	29.2147	26.1285	23.9822	26.6464	31.0898	29.6544	27.1169	27.1729	28.4922	26.9826	25.3491	24.4457	25.6083	24.1508	20.0214	15.8767
	13	21.1192	27.7238	26.7996	26.904	29.7068	33.1594	30.221	27.1367	27.0901	27.8154	24.8668	21.4434	18.1513	16.9216	17.257	15.2011	13.0627
	14		27.6899	27.4514	27.6427	29.3656	29.4932	28.7714	23.6299	22.1654	24.0615	21.7408	18.8773	15.9051	12.442	10.3494	8.74812
	15			27.2343	25.6027	27.4023	26.1696	25.8655	23.9135	20.1404	19.5704	19.3713	15.9909	13.8603	10.0291	6.99275
	16				21.309	25.1794	25.9677	24.6117	21.6504	18.9419	18.4815	16.348	14.0748	13.0091	10.7895
	17					20.5887	21.3451	18.3432	16.221	14.2601	12.9632	11.8827	11.2103	10.4106
8	1					19.4515	25.2321	30.3065	38.2373	35.4317	30.5543	26.1555	18.0674						8																		8
	2					29.1938	32.4167	35.6521	40.8731	39.3685	37.6173	37.1753	35.8855	33.8772
	3			22.9034	30.1656	29.1738	28.5085	27.0748	28.5488	30.3878	32.0279	32.1429	32.9828	30.6039	26.2592
	4		20.901	27.041	28.6108	29.259	27.6907	25.7182	28.217	29.6022	28.5745	26.0404	22.9214	22.1094	20.9364	19.1645
	5	15.6974	20.7576	25.4828	30.9897	33.9958	33.2704	30.6063	30.1305	31.75	31.6782	28.5842	24.3885	21.9957	19.9726	16.6124	17.2961
	6	14.3889	21.378	26.3972	30.2	32.9156	34.959	34.1646	31.09	31.5502	33.03	31.3248	26.8891	21.751	19.3703	16.4682	15.2597	13.7967
	7	15.2774	20.0139	23.0531	24.4623	27.4921	30.4592	32.2366	31.8556	32.7966	32.7961	32.1876	28.9234	22.3354	20.3579	18.6515	17.3142	14.297
	8	18.6123	21.1759	18.7701	18.7134	19.4368	22.85	26.2323	29.4365	32.8458	35.9764	36.5401	34.1558	26.3567	23.4507	21.0143	17.5645	13.998
	9	22.2385	24.3976	20.939	17.4075	17.7609	19.2908	20.3373	22.8204	28.9534	33.1255	38.4246	37.1909	30.1467	24.7926	20.8972	16.0966	10.6076
	10	25.9102	28.6599	24.4723	20.0117	19.3418	20.3492	19.0689	19.0645	22.4803	27.7816	31.2347	33.7423	29.9405	24.2327	21.619	12.9739	8.97605
	11	28.5996	31.2551	27.5111	23.1849	22.6587	23.9162	21.9743	20.3464	22.9266	25.646	28.6747	29.173	27.996	28.7879	25.3988	18.0182	11.7677
	12	27.0719	30.8941	25.1064	24.1173	25.1434	28.6966	27.6528	25.4842	27.2903	28.3008	26.1389	25.6835	24.9842	26.6055	26.2233	22.0785	17.1084
	13	20.6369	26.3265	25.4553	26.251	29.583	31.0121	27.6324	25.5895	25.8801	26.82	23.7437	21.2004	17.9464	16.5048	18.0455	17.0863	14.0059
	14		26.5696	26.5324	27.5923	29.06	28.499	26.5254	23.2128	21.1663	22.763	21.0507	18.6284	14.4359	11.5564	10.914	9.21815
	15			27.6819	27.3874	27.9014	25.6172	25.0978	23.2237	19.5019	19.2106	17.5337	14.0975	12.7992	9.26386	7.25096
	16				22.2849	25.7154	26.6169	23.786	21.2267	17.8818	16.3372	14.501	12.7013	11.7154	8.72989
	17					20.633	20.8395	18.2177	14.6008	12.9923	12.1098	10.2998	10.2505	9.49516
9	1					17.8375	23.2309	31.0066	39.3677	36.0084	32.2875	26.786	18.7146						9																		9
	2					27.7938	29.9934	34.6156	41.5251	41.6525	39.3377	37.4065	35.2657	33.2957
	3			23.4853	30.4283	27.1763	26.9326	27.4048	30.1761	32.4138	32.7759	32.3418	33.0695	31.7537	27.034
	4		22.5846	27.0952	29.9029	30.057	26.5426	25.4989	29.1499	31.8636	29.8832	26.6812	22.6929	21.684	20.8165	18.5113
	5	17.7101	22.4384	27.832	32.2988	34.2744	32.9127	30.5819	30.5579	32.2384	32.7118	29.5651	25.1532	20.5317	18.7146	16.9919	16.6728
	6	17.1586	24.3346	27.9821	31.7621	34.2137	34.9126	33.3128	31.126	31.5887	33.0214	30.8882	24.8399	20.554	18.1918	17.4909	17.0955	14.7714
	7	17.5553	22.0874	24.1049	25.5568	26.9205	29.6431	31.332	31.4939	33.2458	33.4347	32.1966	27.8817	21.7546	20.2454	19.898	18.2298	15.3988
	8	20.2056	23.4152	22.2284	20.6402	19.1488	22.8304	26.6511	30.625	34.3015	36.3418	37.7828	34.2327	27.1579	23.3811	21.473	18.9432	15.0324
	9	22.8353	26.314	23.1308	20.3989	18.4283	22.0019	22.9716	25.1503	30.3129	35.4078	38.5937	38.1805	31.9836	25.9501	21.866	16.8198	11.7051
	10	26.9618	30.0079	25.6628	21.6705	21.5382	24.2846	22.2248	20.566	24.5728	29.0695	32.9489	34.6378	31.9718	27.2738	22.6988	14.1008	9.67262
	11	27.1211	30.9757	26.4617	24.0579	24.3953	26.6031	24.9324	21.6911	24.5897	28.934	30.1045	29.7457	29.8869	29.1607	26.3877	19.9642	12.3869
	12	26.1079	29.625	24.5902	22.4892	24.8685	30.4903	29.6055	26.8983	28.4023	30.3102	27.4924	26.3491	26.2957	27.5434	26.7452	22.3597	17.2752
	13	21.5634	26.8059	25.161	23.758	27.248	31.5932	29.3931	25.9551	27.2147	26.5784	24.6455	21.6525	19.6763	18.8775	18.3266	15.75	13.6832
	14		28.1878	27.6573	27.2871	29.2565	29.0875	27.4774	22.431	20.9963	22.8998	20.2281	18.4236	15.7312	11.8935	11.6227	10.1912
	15			27.1631	26.5786	28.144	26.834	25.7027	22.5482	19.9316	19.2897	17.9486	15.0719	12.9406	9.54611	8.50271
	16				22.3074	25.3804	27.2226	26.1241	22.7143	18.4343	16.192	15.038	13.2101	11.4036	9.53501
	17					21.0151	22.6604	20.7082	16.6245	12.8768	11.3748	10.3989	9.80762	8.95818
10	1					20.2244	25.011	32.6645	38.4828	36.1786	31.2143	25.3874	18.9937						10																		10
	2					28.7457	31.1828	34.9742	41.034	38.9541	37.4435	36.3243	35.1357	32.8432
	3			21.2857	28.501	28.6318	27.6034	26.2337	28.1741	27.9218	31.907	31.5228	31.7261	29.9516	25.9541
	4		20.6515	25.5996	26.7394	30.1546	25.8323	24.0562	25.7801	26.8742	27.1809	22.4897	20.9361	20.0497	19.5507	18.7769
	5	16.2083	21.6882	24.7095	29.018	32.6127	31.9631	29.61	27.3732	28.2317	28.8067	24.6929	21.677	18.1086	18.1656	17.245	17.326
	6	15.7176	22.2882	26.2603	30.1111	33.0996	35.9006	34.0816	31.3367	29.4631	29.5292	26.913	22.9209	18.4251	17.7505	17.6546	17.8072	15.3886
	7	16.3638	21.2476	23.1667	25.1715	27.1369	30.2481	32.8863	32.8798	32.7117	32.8278	30.6819	25.8982	19.6754	19.8691	18.2863	17.8306	15.7224
	8	18.5875	21.2281	20.7366	20.5985	20.4415	22.7707	24.9438	28.6398	33.5867	37.1134	37.2629	33.7632	26.7345	23.2202	21.4504	18.8569	15.8036
	9	21.8173	24.4363	22.0996	20.3561	20.3679	21.3902	21.437	22.9369	28.8304	34.3675	39.3918	39.1694	31.0575	26.4464	22.0569	16.6392	12.8535
	10	26.218	29.3143	24.74	22.6679	21.9753	22.4618	20.9144	19.4771	22.875	27.8475	31.8051	34.245	31.1417	27.7802	23.3049	14.8369	10.3353
	11	27.813	31.7047	28.0772	23.7582	23.3461	25.8184	24.9828	21.8178	24.7304	26.556	28.1255	28.3385	28.2038	29.2868	26.407	20.095	11.9514
	12	23.8423	28.0838	25.8839	23.5078	25.4442	30.2663	29.3901	26.8447	28.5392	28.6705	26.8456	25.2343	25.1863	26.6506	26.1767	22.0445	17.0135
	13	18.7917	26.1693	25.4401	27.5039	30.4019	31.2108	29.7682	26.2514	26.4936	27.1266	25.5111	22.2699	19.1385	18.3273	19.0952	16.7755	14.8513
	14		27.0727	28.5917	28.6154	31.5106	28.9251	27.3094	23.5588	22.0359	24.0489	22.2535	19.7473	16.0569	11.952	11.8107	9.79892
	15			27.79	26.4068	28.5019	26.2651	24.5978	22.2149	19.819	20.3303	18.4158	15.4242	14.0353	9.99648	7.42984
	16				21.886	24.552	25.5335	23.6312	21.7268	17.7967	16.669	15.1566	13.4468	12.7798	10.4399
	17					19.8529	21.6412	18.7514	15.8159	13.8513	12.2406	11.0464	10.7699	10.3772

## Sheet: BT
NumberOfStartingPointsBT
Signals of insufficient quality were excluded from the property maps. Signals could be rejected based on noise low amplitude, large artefact or ventricluar farfields that could not be substracted. Breaktrough can only be identified if a contiguous circle of electrodes enclose the electrode of interest. Therefore electrodes at the border or around a missing electrodes are excluded.
	1	1	2	3	4	5	6	7	8	9	10	11	12	13	14	15	16	17
1	2																		1																		1
	3						15	13	17	23	24	17	0
	4						13	21	13	16	10	14	12	0
	5				8	8	7	19	20	15	7	11	2	14	0
	6			16	19	17	15	10	17	16	16	9	8	12	11	0
	7		8	29	22	24	34	30	34	24	22	10	11	3	10	5	0
	8		20	28	18	11	24	23	18	22	26	18	16	5	7	11	3
	9		32	17	18	13	15	13	14	17	27	22	13	16	20	23	7
	10		12	10	23	17	10	10	16	12	19	7	16	18	7	10	8
	11		21	20	24	10	10	7	10	12	11	14	31	23	5	7	7
	12		17	16	8	14	17	13	16	14	11	20	26	12	6	8	1
	13		13	15	5	33	12	15	21	13	7	11	15	15	4	5	9
	14			10	12	15	8	18	25	14	20	9	16	14	11	13
	15				12	13	18	13	13	19	24	19	12	16	4
	16					10	17	6	18	7	13	10	12	23
	17						18	9	8	10	15	14	2
	1
2	2																		2																		2
	3						10	11	11	16	22	16	0
	4						10	18	17	12	13	13	7	0
	5				9	5	3	22	14	11	11	9	3	17	0
	6			13	15	15	20	4	13	13	15	12	8	4	9	0
	7		5	39	28	34	33	27	24	43	11	17	11	11	6	3	0
	8		22	19	28	11	22	7	22	33	12	16	16	9	9	9	5
	9		18	18	20	16	18	17	18	24	34	25	9	13	18	18	6
	10		13	9	19	20	8	5	16	13	16	22	26	10	3	9	1
	11		15	21	17	14	11	14	4	11	16	23	27	17	7	6	14
	12		16	11	8	5	23	24	14	16	19	11	15	14	6	8	3
	13		9	16	8	44	17	26	28	14	13	15	14	15	5	8	7
	14			8	15	14	18	21	24	17	18	8	8	18	8	13
	15				8	12	13	18	32	20	23	18	12	18	9
	16					11	9	10	18	14	13	11	9	26
	17						14	11	15	12	16	18	6
	1
3	2																		3																		3
	3						9	13	13	29	18	14	0
	4						8	11	14	20	7	9	8	0
	5				13	18	8	23	16	8	12	7	1	18	0
	6			27	21	17	12	9	11	17	15	12	9	8	14	0
	7		18	37	30	22	43	42	23	29	13	13	14	5	6	4	0
	8		39	31	32	19	26	22	26	27	24	16	11	16	5	5	8
	9		21	20	28	23	17	17	25	23	30	26	11	9	23	21	7
	10		19	12	26	23	10	14	11	15	18	30	21	10	6	10	5
	11		30	40	25	14	9	9	18	16	13	19	21	22	5	9	10
	12		24	20	13	12	16	15	23	9	13	11	16	13	8	12	3
	13		19	26	14	43	16	20	34	10	17	19	15	17	6	5	4
	14			17	12	13	11	17	21	18	21	7	16	18	17	9
	15				23	20	13	14	31	21	16	18	20	12	5
	16					12	17	16	16	12	24	33	11	25
	17						17	10	21	20	14	14	9
	1
4	2																		4																		4
	3						14	9	10	26	16	17	0
	4						8	12	15	21	10	9	15	0
	5				8	11	5	19	13	18	13	5	2	25	0
	6			14	14	13	17	6	7	20	20	14	9	6	15	0
	7		10	33	30	30	34	35	37	34	10	16	6	11	7	1	0
	8		32	20	28	19	30	33	28	22	15	24	16	12	13	9	5
	9		24	21	32	17	20	15	22	28	40	37	19	9	28	24	14
	10		14	9	28	16	9	6	20	13	22	26	22	14	8	14	9
	11		23	23	19	8	17	11	12	14	23	20	16	26	5	8	15
	12		16	18	6	5	18	17	16	11	17	22	21	20	9	11	3
	13		11	23	1	39	18	24	31	16	15	20	17	16	5	9	6
	14			16	16	8	12	16	21	19	21	9	15	15	13	11
	15				17	13	10	15	22	21	28	11	16	9	6
	16					11	19	13	21	11	23	23	7	23
	17						23	13	14	15	19	17	9
	1
5	2																		5																		5
	3						25	12	8	28	22	17	0
	4						9	13	18	20	15	14	14	0
	5				11	15	7	31	13	15	10	6	2	16	0
	6			20	16	16	19	9	8	15	21	13	6	10	11	0
	7		7	28	28	33	36	33	31	30	15	11	11	12	7	5	0
	8		20	20	22	11	23	28	17	30	19	24	15	13	7	10	6
	9		13	17	23	14	19	10	17	28	33	28	14	13	26	17	11
	10		12	7	26	29	21	13	19	12	16	18	37	22	12	10	8
	11		20	21	26	14	14	9	22	19	23	17	22	33	6	11	16
	12		15	13	9	4	20	14	15	16	24	28	16	16	7	19	3
	13		14	11	10	40	12	25	31	22	14	7	13	15	7	11	16
	14			15	16	20	8	21	22	23	21	8	11	15	19	15
	15				9	18	12	14	31	30	18	15	22	21	3
	16					8	13	6	22	15	23	17	7	20
	17						20	10	17	21	15	22	11
	1
6	2																		6																		6
	3						14	6	8	25	25	17	0
	4						4	14	11	13	10	11	19	0
	5				13	14	6	29	19	18	8	7	4	13	0
	6			16	20	13	10	15	12	20	11	8	9	6	18	0
	7		15	21	28	23	29	28	33	21	20	13	11	9	5	6	0
	8		22	21	20	12	21	22	22	23	21	8	19	16	6	5	6
	9		18	17	15	11	11	20	20	23	29	24	13	9	17	16	2
	10		14	8	23	9	12	5	12	8	25	14	25	15	7	8	7
	11		21	18	28	14	15	12	9	13	13	16	22	18	2	6	9
	12		20	13	9	8	19	17	26	12	11	12	16	11	4	11	4
	13		11	10	10	33	27	24	26	15	7	17	17	17	5	3	7
	14			14	12	11	8	15	22	17	17	6	22	18	11	6
	15				8	17	14	14	28	23	15	20	17	15	6
	16					14	13	15	24	11	15	24	7	32
	17						12	9	14	8	15	20	8
	1
7	2																		7																		7
	3						12	14	15	20	22	17	0
	4						12	18	17	20	7	11	13	0
	5				11	13	3	19	15	13	8	10	2	18	0
	6			7	24	17	16	7	9	16	13	13	4	10	10	0
	7		7	19	36	33	41	31	18	21	13	18	13	13	5	10	0
	8		23	20	22	17	20	27	18	31	14	13	22	11	8	6	8
	9		19	19	21	20	13	16	15	25	24	24	12	8	20	18	11
	10		21	3	22	21	11	11	8	13	19	16	16	8	10	15	10
	11		17	25	24	16	13	13	13	20	20	21	17	21	12	10	8
	12		21	10	10	8	17	17	21	11	11	26	10	12	14	18	1
	13		7	13	10	34	14	24	24	17	17	11	15	14	2	2	3
	14			13	11	14	16	17	24	26	14	10	15	11	14	9
	15				13	13	8	7	22	29	10	18	13	16	5
	16					10	12	8	18	8	15	31	3	24
	17						17	14	22	16	22	19	6
	1
8	2																		8																		8
	3						11	8	12	22	20	14	0
	4						12	9	12	24	10	18	12	0
	5				11	12	5	6	13	15	19	17	3	22	0
	6			15	11	16	20	9	6	23	17	17	11	15	19	0
	7		9	37	33	26	37	41	28	33	18	19	7	10	6	6	0
	8		20	25	23	14	19	24	23	27	23	21	22	14	6	5	10
	9		23	22	15	9	7	7	17	17	30	21	16	12	16	23	11
	10		12	7	18	15	4	8	13	11	17	11	17	16	6	16	9
	11		22	23	15	10	6	7	12	10	14	14	12	28	3	8	10
	12		19	12	7	3	14	15	16	13	14	22	16	13	4	12	3
	13		8	7	3	41	14	15	22	11	15	12	15	17	3	8	9
	14			12	6	10	7	15	21	16	13	19	18	22	22	14
	15				9	9	19	16	31	21	17	16	14	29	6
	16					12	10	13	17	18	21	20	4	33
	17						17	20	20	15	16	20	6
	1
9	2																		9																		9
	3						17	14	14	36	23	19	0
	4						8	8	18	15	16	22	11	0
	5				11	14	2	19	17	19	6	8	3	21	0
	6			27	16	17	16	11	12	27	17	17	16	16	8	0
	7		8	29	26	21	44	35	32	38	14	22	15	8	5	6	0
	8		27	23	29	14	28	27	22	27	14	21	15	8	6	7	6
	9		20	25	33	17	14	28	17	19	33	19	19	18	18	17	8
	10		18	14	31	33	13	13	16	15	32	19	22	12	10	9	14
	11		16	27	20	23	14	21	11	16	19	27	12	26	6	10	9
	12		20	22	10	16	23	17	22	21	17	28	15	14	7	13	3
	13		9	14	8	39	18	24	28	22	14	16	18	19	7	7	7
	14			10	15	11	10	18	29	15	18	13	17	16	12	14
	15				15	15	10	15	23	25	19	23	15	16	12
	16					16	11	7	16	12	23	17	9	26
	17						15	12	22	13	19	20	5
	1
10	2																		10																		10
	3						15	13	9	25	32	22	0
	4						14	18	14	15	11	18	13	0
	5				9	13	11	20	18	10	14	8	6	17	0
	6			10	13	18	9	6	5	20	14	10	11	14	15	0
	7		8	23	30	27	42	32	30	50	14	16	11	13	5	5	0
	8		20	27	29	26	17	20	17	24	25	11	11	10	8	15	6
	9		10	20	15	12	10	13	10	30	36	20	11	11	16	13	6
	10		15	8	21	31	14	10	7	9	26	13	26	12	7	5	11
	11		15	21	18	17	12	7	12	16	24	23	19	26	12	5	12
	12		9	21	7	8	17	22	33	13	21	18	19	19	11	18	3
	13		9	12	6	25	13	25	34	22	11	7	18	17	13	7	5
	14			8	7	10	16	23	28	24	17	12	17	13	15	4
	15				15	14	11	23	17	21	21	23	17	18	4
	16					11	12	9	13	6	13	19	7	26
	17						17	13	17	7	12	17	5

## Sheet: FI
FractionationIndices
Signals of insufficient quality were excluded from the property maps. Signals could be rejected based on noise low amplitude, large artefacts or ventricluar farfields that could not be substracted. Fractionation index is particularly sensitive to noise. Therefore electrodes with substantial noise are more strictly excluded.
		1	2	3	4	5	6	7	8	9	10	11	12	13	14	15	16	17
1	1					2.85781	2.75	3.57471	3.68468	1.663	1.33479	1.14381	0.736726						1																		1
	2					1.43864	1.43468	2.17808	2.06834	1.32653	1.93512	1.98901	2.43237	3.05778
	3			1.6056	1.41319	1.25055	1.28667	1.07982	1.63616	1.44369	0.743929	0.679121	1.24115	2.69095	3.13938
	4		1.30928	1.38509	1.36093	0.589633	0.83878	0.522876	1.1796	1.54102	1.36404	0.655773	0.554348	1.33333	2.25541	2.8952
	5	1.9551	1.56996	1.47143	2.0124	1.95106	1.47845	0.825054	1.07205	1.38326	1.45916	1.19523	0.835853	0.665948	1.4172	1.92308	2.81466
	6	1.51919	1.9816	3.26446	2.50939	2.47234	4.84698	2.35729	2.63983	2.11472	1.87773	1.27632	0.842672	0.857143	0.888889	1.44681	1.88889	2.81013
	7	2.31992	2.44534	2.0081	2.03386	2.02605	2.17248	2.44191	2.21008	2	2.03433	2.41266	1.03226	0.978678	1.1741	1.44864	1.87891	2.4375
	8	2.72188	2.36948	2.164	1.90514	1.76436	3.00399	2.34809	3.1677	2.35021	2.99151	4.51965	1.66594	1.01483	1.47669	1.57053	1.89979	2.16907
	9	2.39588	1.84274	1.45	1.75992	1.57874	2.64484	1.334	1.32465	1.78029	2.90947	4.49024	3.2784	1.6951	0.912134	1.15449	1.423	1.62963
	10	2.89648	2.56557	1.804	1.97018	1.93267	1.76575	2.23553	0.737475	0.704	0.845382	1.20083	1.73895	1.59789	1.28482	1.02088	0.675565	1.34021
	11	2.48401	2.29461	2.10656	2.112	2.02783	3.85516	1.67	0.69685	0.767068	0.858586	0.908537	0.694332	0.739308	0.933054	1.22428	0.791753	1.50722
	12	1.84342	2.03893	1.69636	1.77733	1.81076	2.07415	2.31548	1.73506	2.27439	1.26892	0.559524	0.677866	0.821218	0.932939	1.058	1.46296	2.2686
	13	1.38509	1.6722	1.78586	1.70492	1.99796	2.52075	1.92986	1.70276	1.25	1.21331	0.836257	0.524272	0.661568	0.820611	0.408046	1.14596	1.8171
	14		2.29787	1.61203	1.81837	1.76082	1.34553	1.27888	0.992157	0.932563	1.08203	0.809249	0.863462	0.435606	0.308271	0.186312	0.946869
	15			1.44262	1.4664	1.3798	1.249	1.5641	1.16117	0.88417	0.849421	0.714559	0.516252	0.286528	0.184061	0.269962
	16				1.26482	0.895669	1.07059	1.59252	0.994186	1.17408	0.72549	0.546667	0.329502	0.428571	0.274621
	17					0.614931	0.678571	0.790698	0.711799	1.0642	1.13529	0.978764	0.557252	0.703422
2	1					2.72326	2.57541	3.1977	3.29412	1.52222	1.36062	1.13245	0.732301						2																		2
	2					1.34018	1.44898	2.13832	2.09502	1.32379	1.93454	1.97982	2.36199	2.99774
	3			1.54681	1.37391	1.18901	1.17226	1.08426	1.625	1.55876	0.809935	0.589633	1.07625	2.60398	3.09313
	4		1.35404	1.34091	1.31857	0.644397	0.800439	0.523913	1.17401	1.45254	1.59211	0.739316	0.463675	1.44872	2.24894	2.88627
	5	1.87805	1.49897	1.43093	1.78616	1.90948	1.5625	0.71645	1.08994	1.45435	1.45714	1.35358	0.810235	0.53178	1.64271	2.00837	2.97053
	6	1.38866	1.85976	3.02881	2.08316	2.15063	6.10262	2.33833	2.56263	2.06838	1.76264	1.5098	0.900634	0.841772	0.861053	1.42739	1.91511	2.70455
	7	2.07302	2.24145	1.87324	1.73293	1.85968	1.9816	2.27386	2.14017	1.98718	1.9154	2.77632	1.1962	0.981172	1.23142	1.54071	1.95464	2.34694
	8	2.62525	2.02191	1.80473	1.69488	1.69246	3.014	2.34531	2.99174	2.31092	2.92424	4.70996	1.83404	1.01443	1.56159	1.58613	1.9165	2.05433
	9	2.33608	1.75301	1.46429	1.75397	1.49209	2.61111	1.26667	1.33733	1.76162	3.01053	4.60044	3.31498	1.76101	1.02479	1.15102	1.55466	1.62551
	10	2.79622	2.59875	1.71968	1.87475	1.8745	1.70751	2.17131	0.781496	0.689723	0.935354	1.13485	1.53602	1.46266	1.2284	1.10707	0.695565	1.35282
	11	2.42949	2.29583	2.05061	1.92972	2.01394	3.92216	1.81076	0.791339	0.719682	0.90303	0.930754	0.752016	0.692615	0.842105	1.34274	0.848	1.6493
	12	1.83368	1.9125	1.64909	1.63747	1.80276	2.26559	2.56262	1.73228	2.28287	1.4198	0.589844	0.619691	0.867052	0.964981	1.05315	1.41247	2.19038
	13	1.26875	1.61746	1.65226	1.65021	1.90144	2.43878	1.75595	1.63922	1.33398	1.37911	0.915058	0.576402	0.677358	0.867562	0.401923	1.04094	1.68762
	14		2.17373	1.65773	1.70124	1.59026	1.388	1.41535	0.937008	0.967118	1.04744	0.776718	0.765152	0.570888	0.380769	0.231358	1.01154
	15			1.49693	1.37195	1.30522	1.11811	1.51772	1.14427	0.93617	0.955939	0.807985	0.671727	0.360531	0.21374	0.3327
	16				1.18416	0.860835	1.06796	1.38728	1.15354	1.2846	0.802303	0.667939	0.439771	0.508475	0.298311
	17					0.671287	0.705426	0.748062	0.816406	1.05588	1.00194	0.980952	0.600382	0.747592
3	1					2.68254	2.7618	3.37723	3.47672	1.4838	1.42765	1.06494	0.738095						3																		3
	2					1.56222	1.61184	2.33187	2.23111	1.33624	1.86957	1.89655	2.43348	3.00651
	3			1.86983	1.52688	1.18103	1.45553	1.18872	1.68202	1.54565	0.723176	0.655983	1.20339	2.47084	2.92903
	4		1.48024	1.53069	1.66937	0.748945	1.07234	0.690832	1.28261	1.54486	1.49032	0.712474	0.480084	1.25745	2.11789	2.79368
	5	2.09496	1.79684	1.48915	2.04427	2.14609	1.70402	0.978814	1.24468	1.61739	1.49024	1.21581	0.665966	0.626305	1.40871	1.96281	2.82887
	6	1.54457	2.12573	3.43651	2.52314	2.39718	4.2588	2.37578	2.63655	1.98305	1.82646	1.20726	0.850211	0.797101	0.799587	1.35876	1.8866	2.77393
	7	2.40192	2.48054	2.23166	2.22136	2.04415	2.06238	2.31579	2.12371	1.96008	1.93978	2.62635	1.0865	0.886128	1.2125	1.51139	1.97732	2.41837
	8	3.16339	2.52601	2.44045	2.13183	1.96623	2.75619	2.35135	3.05433	2.50207	2.99368	4.81779	1.73996	0.898551	1.42531	1.48963	1.97325	2.13992
	9	2.57624	1.99423	1.60456	2.00189	1.78571	2.57905	1.39347	1.46899	1.78543	2.7439	4.0572	3	1.73859	0.979339	1.05521	1.59016	1.67073
	10	3.10883	2.88933	2.01923	1.98315	2.00378	1.85521	2.3762	0.853333	0.700193	0.860511	1.11952	1.73171	1.44106	1.24897	1.01014	0.736308	1.33809
	11	2.59746	2.45979	2.26223	2.14286	2.1092	4.12597	1.85934	0.803435	0.826172	1.00786	0.926877	0.712	0.7749	0.924949	1.32994	0.839757	1.6721
	12	2.01224	2.10865	1.81532	1.9043	2.02729	2.33464	2.7045	1.8716	2.32359	1.36965	0.591171	0.630058	0.829126	0.994163	1.16306	1.60569	2.52525
	13	1.41935	1.78499	1.96032	1.954	2.11562	2.61866	2.03868	1.6019	1.39924	1.36329	0.921606	0.641905	0.659813	0.714556	0.389414	1.09387	1.86408
	14		2.43983	1.79022	1.79675	1.78586	1.48622	1.50778	1.08539	1.01512	1.18406	0.828302	0.926829	0.537736	0.29368	0.204887	1.07765
	15			1.606	1.49304	1.56548	1.37331	1.69038	1.23755	1.02495	1.05577	0.768946	0.607076	0.341373	0.205937	0.31903
	16				1.24031	0.978764	1.26692	1.61154	1.09488	1.23178	0.781308	0.717803	0.437736	0.527881	0.313653
	17					0.653179	0.773694	1.0094	0.805243	1.06286	1.07008	1.08679	0.588889	0.719852
4	1					2.65385	2.72562	3.46742	3.53229	1.64795	1.21322	1.07495	0.667377						4																		4
	2					1.30317	1.50448	2.15541	2.19956	1.30217	1.79956	2.05591	2.64147	3.16957
	3			1.51775	1.45923	1.22414	1.29348	1.21786	1.75328	1.61874	0.623656	0.560086	1.0974	2.56863	2.98498
	4		1.35815	1.3502	1.47205	0.668076	0.827292	0.626068	1.18803	1.56957	1.55794	0.651064	0.474684	1.25581	1.98943	2.6308
	5	1.92871	1.48297	1.38431	1.90184	1.93333	1.5966	0.855626	1.1465	1.62203	1.57974	1.34461	0.689583	0.547917	1.31381	1.86335	2.74074
	6	1.4165	1.98606	3.21932	2.45968	2.37449	3.79012	2.39709	2.6971	2.20382	1.74678	1.41791	0.849372	0.798755	0.907216	1.43326	1.93852	2.6101
	7	2.21542	2.58743	2.28094	2.2233	1.97318	2.27485	2.43927	2.27459	2.07835	2.13248	2.78541	1.0566	0.923711	1.19167	1.56584	1.91667	2.354
	8	2.8004	2.40711	2.27573	2.10707	2.05192	3.14286	2.40351	2.9662	2.52371	3.09034	4.81585	1.65966	0.96701	1.47727	1.53131	1.93613	2.07984
	9	2.412	1.87549	1.61583	1.9751	1.75483	2.72115	1.37165	1.31407	1.7574	2.90103	4.28025	3.09657	1.81366	1.10387	1.11717	1.43	1.49602
	10	2.83058	2.84646	2.02677	2.26104	2.09126	1.79231	2.1518	0.850575	0.77176	1.04134	1.2621	1.74639	1.57551	1.31976	0.922	0.658052	1.167
	11	2.51695	2.62012	2.31361	2.16339	2.1767	4.15058	1.76482	0.770398	0.840077	0.937378	0.96063	0.778865	0.777778	0.961616	1.25703	0.769076	1.46108
	12	1.8554	2.0161	1.78585	1.76817	1.77992	2.24854	2.78571	1.85632	2.43883	1.33658	0.598456	0.653992	0.807985	1.07634	1.10192	1.322	2.06
	13	1.36992	1.75714	1.99195	1.82306	1.8978	2.56773	2.01524	1.64312	1.25	1.24105	0.8659	0.552632	0.724074	0.76234	0.435662	1.18846	1.74855
	14		2.20697	1.68136	1.73757	1.82869	1.43222	1.46718	1.04315	0.968045	1.05234	0.760223	0.900552	0.480734	0.331512	0.191606	1.06273
	15			1.52964	1.45472	1.39922	1.2471	1.6979	1.32392	1.07449	1.00185	0.814338	0.574545	0.315217	0.211573	0.250454
	16				1.17988	0.859615	1.2552	1.68182	1.10781	1.29205	0.806273	0.641026	0.377495	0.468354	0.327273
	17					0.591255	0.743346	0.891182	0.873371	1.04291	0.955638	1.0167	0.514706	0.688073
5	1					2.84318	2.86009	3.31891	3.43956	1.31692	1.16737	1.08917	0.721277						5																		5
	2					1.53244	1.54	2.14159	2.19956	1.29935	1.91068	2.03448	2.58824	3.18143
	3			1.5	1.43261	1.22222	1.32391	1.23644	1.76087	1.59785	0.70276	0.583864	1.12607	2.50427	2.87158
	4		1.308	1.42254	1.45041	0.728421	1.01062	0.594937	1.23391	1.65451	1.62527	0.78178	0.483264	1.27766	2.21031	2.82062
	5	1.89641	1.49503	1.41165	1.75254	2.0332	1.54979	1.01053	1.22689	1.57204	1.54176	1.26907	0.713389	0.559671	1.4856	1.93483	2.81781
	6	1.3787	1.94622	3.01205	2.20404	2.32922	3.73045	2.23868	2.76923	2.13417	1.93644	1.3482	0.913043	0.862423	0.928862	1.35556	1.88176	2.656
	7	2.17913	2.18898	1.99606	1.95678	1.99606	2.226	2.37525	2.25364	2.03112	2.1589	2.69017	1.16529	0.969512	1.21074	1.51717	1.96774	2.30417
	8	2.53649	2.02959	1.88477	1.83559	1.89189	3.24708	2.62648	3.17742	2.47336	3.01879	4.69872	1.93361	1.02823	1.51546	1.55847	1.856	2.05709
	9	2.28656	1.71569	1.56445	1.89922	1.7341	2.86381	1.41085	1.33012	1.73031	2.89775	4.52301	3.20632	1.87143	1.11717	1.15905	1.27006	1.53635
	10	2.8668	2.562	1.86471	1.95349	2.04247	1.79845	2.33721	0.790076	0.793893	1.06008	1.22709	1.74949	1.5061	1.34747	0.968254	0.679764	1.25444
	11	2.61814	2.4551	2.21074	1.9863	2.08611	4.03333	1.99808	0.860421	0.936538	1.0275	0.931641	0.75534	0.785992	1.00198	1.22835	0.72332	1.54438
	12	2.03106	1.94188	1.68713	1.75889	1.74659	2.26121	2.65451	1.88571	2.36207	1.5	0.657795	0.712963	0.892193	1.04655	1.10626	1.44008	2.13949
	13	1.43408	1.72267	1.85317	1.86733	2.01796	2.5507	1.9619	1.48876	1.20818	1.34644	0.969811	0.590074	0.638838	0.861314	0.470588	1.21591	1.7931
	14		2.423	1.818	1.86826	1.75889	1.39197	1.41603	0.981413	0.893382	1.15584	0.705128	0.838182	0.443431	0.40884	0.232601	1.12082
	15			1.51992	1.49708	1.54198	1.29367	1.66987	1.24581	0.903882	0.92037	0.686924	0.576923	0.340037	0.224231	0.3766
	16				1.23674	0.930189	1.18045	1.69346	1.10575	1.25046	0.777574	0.604015	0.396739	0.512681	0.293694
	17					0.573585	0.767225	1.12754	0.897248	1.11581	1.14391	1.09872	0.681818	0.718978
6	1					2.63964	2.6298	3.19773	3.30349	1.48414	1.08368	1.10381	0.754757						6																		6
	2					1.27212	1.42444	2.0133	1.95633	1.24249	1.8203	2.11349	2.4697	3.11613
	3			1.48117	1.45043	1.18182	1.26258	1.21522	1.59121	1.35808	0.581741	0.565678	1.05769	2.66377	3.26609
	4		1.39357	1.47862	1.23602	0.666667	0.871795	0.541935	1.16847	1.5558	1.38478	0.655391	0.476987	1.21564	2.34238	2.95625
	5	1.90873	1.5239	1.43522	1.80408	1.89583	1.60677	0.868644	1.23504	1.4913	1.36404	1.11638	0.791232	0.565217	1.6157	1.88057	2.86842
	6	1.38067	1.98218	3.30461	2.114	2.29459	3.6135	2.17427	3.03758	2.19958	1.72113	1.23871	0.906445	0.85567	1.00407	1.36673	1.92	2.52673
	7	2.19685	2.2	2.01179	1.81092	1.90234	2.11637	2.35887	2.25673	2.03975	1.99358	2.61834	1.20998	0.997955	1.20528	1.54819	1.78443	2.07708
	8	2.50593	2.182	2.0619	1.74088	1.91031	2.8932	2.3419	3.02231	2.30372	3.07173	4.80338	1.84742	1.03469	1.53252	1.46627	1.83034	1.87897
	9	2.31299	1.94942	1.66474	1.84877	1.68893	2.56262	1.34503	1.35029	1.63673	2.91429	4.47458	3.10338	1.75205	0.983968	1.03373	1.41468	1.44024
	10	2.89655	2.9501	1.90485	1.92486	1.90211	1.74521	2.11284	0.770874	0.648438	0.919132	1.14286	1.50203	1.16566	1.13052	0.902584	0.554672	1.17857
	11	2.43856	2.34702	2.10495	2.02718	2.06238	3.87135	1.68677	0.881553	0.765166	0.98419	0.909627	0.683168	0.587426	0.675197	1.01587	0.723108	1.39044
	12	1.53971	1.702	1.4585	1.6501	1.82574	2.10763	2.34942	1.64865	2.20703	1.32353	0.557282	0.657197	0.869811	1.0539	1.0153	1.23819	1.91124
	13	1.15275	1.50505	1.74899	1.68612	1.90081	2.36874	1.63862	1.32959	1.14528	1.21161	0.881579	0.581181	0.669691	0.769231	0.383363	1.16856	1.70857
	14		1.99179	1.65992	1.68219	1.66	1.37549	1.33143	0.904851	0.788785	0.942804	0.759058	0.788427	0.475588	0.288288	0.163964	1.04521
	15			1.45743	1.46457	1.48738	1.39072	1.58812	1.09962	0.859779	0.801105	0.854512	0.529946	0.333333	0.194643	0.359431
	16				1.21648	0.806513	1.08302	1.52158	1.0705	1.25	0.714801	0.619565	0.341113	0.5	0.282374
	17					0.621212	0.761639	0.858974	0.771062	0.956443	0.92976	0.967153	0.558984	0.674545
7	1					2.79955	2.81292	3.55432	3.40959	1.49574	1.15074	1.08051	0.686441						7																		7
	2					1.43653	1.52539	2.23956	2.02626	1.11489	1.86052	2.06074	2.48927	3.05732
	3			1.48041	1.38675	1.24784	1.41957	1.12445	1.57826	1.43683	0.613924	0.647917	1.13866	2.4089	2.85381
	4		1.35842	1.47024	1.44898	0.640592	1.03412	0.573876	1.13607	1.53996	1.54025	0.708678	0.576446	1.27743	2.06054	2.61169
	5	1.96857	1.56016	1.51292	1.92972	2.03734	1.58686	0.940803	1.0794	1.37093	1.52137	1.25732	0.806186	0.598344	1.42331	1.85481	2.64948
	6	1.43275	2.14538	3.42545	2.452	2.30691	5.92292	2.22756	2.65762	1.93206	1.64103	1.29536	0.85124	0.755601	0.919753	1.42363	1.94589	2.69461
	7	2.15728	2.36595	2.19298	1.78168	1.95728	2.10256	2.2753	2.14433	1.95816	1.93206	2.67516	1.03306	0.946721	1.18891	1.49697	1.862	2.34783
	8	2.79061	2.40117	2.09785	1.73129	1.78998	2.83815	2.32812	2.86028	2.3272	2.97053	4.6589	1.67917	0.95122	1.47035	1.556	1.82806	2.02935
	9	2.33663	1.87329	1.54808	1.73946	1.52281	2.49518	1.35769	1.37255	1.71032	3.00808	4.16667	2.80932	1.64155	0.977956	1.06613	1.54274	1.58594
	10	2.79675	2.63074	1.83721	2.00577	1.92529	1.67115	2.35755	0.91635	0.703633	0.887814	1.17964	1.45344	1.35	1.288	1.07312	0.718992	1.33333
	11	2.39085	2.27607	2.08644	1.96686	1.99611	3.98235	1.89101	0.869811	0.723735	0.964567	0.956693	0.637255	0.700193	0.838264	1.39173	0.835294	1.61133
	12	1.62449	1.66402	1.55424	1.66075	1.69155	2.26367	2.76699	1.85632	2.43615	1.38716	0.673114	0.562264	0.754682	0.943503	1.10496	1.42718	2.13307
	13	1.2101	1.48589	1.72946	1.692	1.83534	2.41633	2.00381	1.65356	1.1651	1.41996	0.846154	0.538033	0.619926	0.770522	0.389199	1.08539	1.6673
	14		2.14168	1.70243	1.75449	1.74308	1.41326	1.51238	1.09888	0.923792	1.13222	0.805147	0.787546	0.448905	0.335175	0.210037	0.988743
	15			1.4311	1.37769	1.39062	1.25434	1.72917	1.32519	0.966292	1.00375	0.818015	0.548446	0.286751	0.200364	0.273551
	16				1.19386	0.870229	1.07414	1.69886	1.02632	1.17416	0.783333	0.712454	0.381387	0.505474	0.337568
	17					0.545283	0.613806	0.964815	0.85267	0.992674	1.03683	1.0223	0.590406	0.69708
8	1					2.82167	2.68973	3.24832	3.42129	1.5705	1.25652	1.04536	0.687636						8																		8
	2					1.43612	1.57018	2.11597	1.93654	1.27371	1.90044	1.97835	2.49339	3.13393
	3			1.51261	1.46667	1.23176	1.20426	1.04915	1.44035	1.45534	0.858369	0.793177	1.19528	2.67177	3.0216
	4		1.38182	1.31967	1.29193	0.658174	0.883475	0.548729	1.16383	1.53478	1.49676	0.791489	0.571125	1.35837	2.20763	2.78632
	5	2.00401	1.52727	1.46856	1.82268	1.93125	1.55975	0.892632	1.06526	1.53205	1.38661	1.16418	0.900212	0.676596	1.57053	2.06598	2.853
	6	1.34127	1.91	3.03831	2.28247	2.13169	6.11231	2.10833	2.56485	2.08996	1.84797	1.34607	0.872385	0.922594	0.92887	1.42094	1.92434	2.76016
	7	2.06188	2.22421	1.94685	1.8631	1.86417	2.06531	2.21193	2.23431	2.03564	2.08369	2.72495	1.14286	1.02532	1.24211	1.61443	1.99384	2.39718
	8	2.53571	2.17194	1.9057	1.67194	1.63834	2.812	2.25051	2.82172	2.30417	3.01288	4.89371	1.85263	1.04536	1.74214	1.61885	1.91734	2.16499
	9	2.18637	1.69291	1.52559	1.59449	1.50988	2.50598	1.23016	1.2515	1.51012	2.87866	4.46121	3.57267	1.73554	0.907598	1.08468	1.45674	1.61771
	10	3.01879	2.611	1.76087	1.88477	1.84872	1.55556	2.14764	0.785156	0.625984	0.863727	1.15918	1.49897	1.26489	1.16735	0.895161	0.708835	1.32136
	11	2.59743	2.29012	1.9839	1.90656	1.8869	3.81437	1.65217	0.851272	0.765873	0.918	0.926148	0.682093	0.603622	0.753535	1.07214	0.810101	1.51815
	12	1.8193	1.81466	1.61044	1.63817	1.71513	2.07585	2.49802	1.81818	2.3499	1.37052	0.587084	0.640777	0.90297	1.07227	0.992233	1.32797	2.05221
	13	1.26316	1.72245	1.78252	1.70445	1.84413	2.19596	1.72332	1.42607	1.20503	1.40705	0.88932	0.576699	0.712644	0.910134	0.5	1.20784	1.90909
	14		2.25988	1.72874	1.85396	1.73	1.47151	1.33203	0.955513	0.933078	1.19268	0.877432	0.921456	0.541109	0.376673	0.286807	1.1657
	15			1.73757	1.48617	1.42801	1.1875	1.68689	1.23346	0.936782	0.905123	0.830443	0.604207	0.349904	0.275335	0.372849
	16				1.17636	0.752437	1.19253	1.6537	1.08527	1.34109	0.822612	0.660819	0.416185	0.604288	0.399618
	17					0.615087	0.843444	0.957611	0.854127	1.03282	1.00385	0.990329	0.690249	0.771154
9	1					2.74099	2.6435	3.15536	3.23011	1.55063	1.31712	1.16102	0.660338						9																		9
	2					1.14634	1.48678	2.03111	1.95207	1.36247	2.00658	1.99785	2.50324	3.11522
	3			1.52311	1.2227	1.09677	1.17391	1.0303	1.52391	1.56681	0.680761	0.666667	1.23158	2.45223	2.89597
	4		1.47047	1.43849	1.53306	0.578059	0.785106	0.569002	1.13919	1.61472	1.56688	0.65625	0.568465	1.34719	2.14639	2.71959
	5	2.13813	1.53033	1.472	1.89024	1.7422	1.49896	0.852941	1.13053	1.46203	1.47527	1.15546	0.73499	0.537832	1.46201	1.97358	2.82822
	6	1.41313	2.09785	3.04382	2.30645	2.10887	5.60976	2.23045	2.5	1.90397	1.71306	1.32068	0.821206	0.712831	0.765306	1.45436	2.15854	2.98163
	7	2.21748	2.32427	2.10874	1.87861	1.95543	2.05294	2.284	2.13618	2.00833	1.95931	2.27778	0.973029	0.819473	1.14315	1.60204	2.21325	2.66667
	8	2.77291	2.2807	2.20537	1.88826	1.86629	2.88632	2.39376	2.8869	2.43659	3	4.29032	1.60587	0.931174	1.54918	1.78882	2.0426	2.35628
	9	2.34118	1.84302	1.61154	1.99618	1.6566	2.79231	1.36484	1.35838	1.78614	2.77664	4.19368	2.97877	1.85041	1.07784	1.244	1.68577	1.78024
	10	3.09859	2.51881	2.01357	2.08238	2.03626	1.93462	2.35619	0.835849	0.729679	0.949807	1.21611	1.49497	1.60966	1.48016	1.14257	0.8083	1.42659
	11	2.52292	2.2915	2.22004	2.13127	2.17054	4.48444	2.10618	0.775895	0.803435	1.06019	1.02367	0.693642	0.754386	1.04167	1.4493	0.819085	1.72024
	12	1.6558	1.69048	1.57647	1.74364	1.71373	2.25581	2.83008	1.89635	2.38314	1.38343	0.663498	0.734345	0.945386	1.27168	1.28161	1.55534	2.37822
	13	1.13226	1.51287	1.63581	1.758	1.88294	2.32465	1.77863	1.5	1.28625	1.40672	0.921642	0.622921	0.79566	0.850091	0.515596	1.26316	1.87786
	14		2.19388	1.69138	1.83333	1.79359	1.38132	1.40943	1	0.981273	1.15213	0.932482	0.998182	0.551971	0.34955	0.254513	1.14154
	15			1.58447	1.34369	1.41075	1.39768	1.69508	1.22495	0.990758	1.05794	0.959633	0.72482	0.374101	0.235081	0.396396
	16				1.0797	0.821092	1.14717	1.79887	1.20779	1.2281	0.828154	0.762681	0.432675	0.616364	0.29982
	17					0.681132	0.968105	1.13941	1.11152	1.20956	1.00365	1.05989	0.646098	0.744102
10	1					2.79085	2.79075	3.26535	3.3176	1.33613	1.13235	0.981053	0.739496						10																		10
	2					1.4806	1.6	2.05579	2.02128	1.21921	1.77615	1.8431	2.4238	3.07627
	3			1.34898	1.42558	1.15658	1.14346	1.05462	1.55839	1.38901	0.690083	0.593361	1.1805	2.54105	2.98121
	4		1.40514	1.46215	1.33939	0.587629	0.910973	0.525	1.06765	1.48428	1.49272	0.663223	0.48866	1.19462	2.21325	2.79132
	5	1.88409	1.53137	1.47628	1.70741	1.8668	1.64139	0.86722	1.10692	1.40501	1.37214	1.23859	0.771605	0.518443	1.56237	1.92369	2.84105
	6	1.33333	1.8902	2.96282	2.2619	2.12948	5.80122	2.34082	2.63878	1.92623	1.60833	1.26915	0.742394	0.700405	0.94165	1.50201	2.07229	2.65945
	7	1.96693	2.2147	1.86782	1.78613	1.92395	2.03101	2.29412	2.22445	1.94479	1.95643	2.17464	0.973523	0.83871	1.23926	1.58065	2.00202	2.4165
	8	2.3716	2.07602	1.90649	1.74811	1.78113	2.66667	2.26163	2.8248	2.40524	2.97938	4.54865	1.65385	0.874251	1.6101	1.63095	2.02549	2.31944
	9	2.18075	1.85521	1.47893	1.77462	1.50566	2.52462	1.29389	1.27151	1.57418	2.67068	4.3567	2.83678	1.69444	1.0377	1.26275	1.60784	1.75586
	10	2.932	2.68173	1.73996	1.98292	1.86907	1.84542	2.327	0.76145	0.680769	0.944015	1.19882	1.55378	1.36505	1.3901	1.09709	0.807767	1.45614
	11	2.55488	2.44882	2.14672	2.00384	2.00382	3.95985	1.89464	0.83871	0.799235	1.02703	0.918919	0.746154	0.65	0.965116	1.48837	0.846899	1.63424
	12	1.62475	1.69981	1.56093	1.6531	1.75385	2.1954	2.60229	1.79356	2.17591	1.3738	0.514124	0.719557	0.940959	1.09427	1.24812	1.53385	2.35135
	13	1.0754	1.49606	1.67583	1.72244	1.92621	2.33075	1.73271	1.38532	1.23853	1.24587	1.04059	0.677536	0.714029	0.802158	0.472172	1.30983	1.88662
	14		2.12727	1.77318	1.90927	1.89443	1.45318	1.34622	0.985294	0.949731	1.11957	0.72695	0.871025	0.430605	0.323268	0.180357	1.08423
	15			1.53179	1.45386	1.68165	1.32541	1.65314	1.10747	0.870968	1.02166	0.883513	0.675579	0.310954	0.200704	0.337478
	16				1.26471	0.728625	1.24349	1.58716	1.08561	1.24682	0.854867	0.708185	0.37766	0.575488	0.300353
	17					0.658088	0.823315	1.00721	0.862816	1.00716	1.04301	1.03036	0.59292	0.782918

## Sheet: CV
MeanVelocity
Signals of insufficient quality were excluded from the property maps. Signals could be rejected based on noise low amplitude, large artefact or ventricluar farfields that could not be substracted.
		1	2	3	4	5	6	7	8	9	10	11	12	13	14	15	16	17
1	1					0.681848	0.688367	0.7582	0.717789	0.691015	0.77285	0.784311	0.779202						1																		1
	2					0.694493	0.731953	0.762437	0.743049	0.733723	0.81345	0.901123	0.910041	0.954672
	3			0.611485	0.655193	0.667147	0.764409	0.722905	0.794345	0.806078	0.813396	0.811215	0.896954	1.02738	1.11206
	4		0.597298	0.607545	0.642828	0.628456	0.702358	0.713854	0.782132	0.780196	0.759788	0.820528	0.844699	0.926808	1.1161	1.27783
	5	0.605582	0.692547	0.611254	0.666358	0.677815	0.685062	0.731118	0.759991	0.790382	0.787065	0.765988	0.791177	0.904675	1.02934	1.10452	1.25403
	6	0.626466	0.687235	0.68606	0.787614	0.770333	0.775045	0.749109	0.768781	0.795843	0.771642	0.779699	0.821587	0.91752	1.00671	1.05689	1.09655	1.27942
	7	0.674019	0.684196	0.735092	0.806351	0.799554	0.838056	0.800966	0.846731	0.857075	0.804299	0.799772	0.805911	0.864291	0.963314	1.02422	1.08952	1.21366
	8	0.756474	0.770947	0.751936	0.813619	0.808904	0.806739	0.842612	0.871996	0.800679	0.808248	0.728411	0.746517	0.769147	0.880492	0.9969	1.02325	1.22805
	9	0.684721	0.727175	0.740811	0.784016	0.807227	0.776388	0.753261	0.802562	0.750105	0.690153	0.67663	0.69005	0.723446	0.8075	0.908026	1.01203	1.13521
	10	0.66399	0.694421	0.734143	0.789055	0.801391	0.839203	0.791911	0.811938	0.69456	0.680984	0.622277	0.654201	0.684173	0.7346	0.868594	0.91398	1.09082
	11	0.690912	0.774735	0.74798	0.782539	0.793382	0.821444	0.790272	0.700073	0.663555	0.654301	0.637384	0.630826	0.6302	0.65287	0.838111	0.902511	1.00548
	12	0.688817	0.706393	0.712748	0.80996	0.751712	0.786423	0.796827	0.728848	0.714689	0.651705	0.625506	0.598262	0.604211	0.681236	0.778839	0.940543	1.08136
	13	0.652099	0.717854	0.717687	0.75095	0.734214	0.742817	0.722026	0.688218	0.678736	0.658453	0.638148	0.630734	0.651671	0.707483	0.834041	0.949651	1.12555
	14		0.632154	0.666011	0.66078	0.656227	0.639506	0.696066	0.71986	0.692994	0.699188	0.692652	0.741912	0.81055	0.871559	0.926682	1.07863
	15			0.672226	0.657668	0.668607	0.649489	0.674662	0.741182	0.767456	0.776791	0.813099	0.845628	0.925389	1.02527	1.07861
	16				0.580172	0.63977	0.655098	0.67263	0.679467	0.786092	0.81318	0.845036	0.865296	0.958275	1.0215
	17					0.627647	0.622254	0.638301	0.683403	0.77718	0.845817	0.919498	0.9556	0.986298
2	1					0.612913	0.687538	0.695525	0.714923	0.656102	0.704886	0.698427	0.755339						2																		2
	2					0.583756	0.669432	0.702743	0.684978	0.661052	0.789912	0.792169	0.842194	0.895434
	3			0.571872	0.587691	0.589091	0.662669	0.668276	0.718297	0.705484	0.703711	0.771048	0.792201	0.885125	1.05487
	4		0.586753	0.60454	0.599083	0.61389	0.627699	0.674096	0.736552	0.721401	0.740174	0.75684	0.802265	0.868741	0.986482	1.13554
	5	0.596349	0.636394	0.639233	0.646392	0.659216	0.681592	0.707386	0.781925	0.7504	0.707103	0.730116	0.806048	0.89633	1.0055	1.08721	1.19235
	6	0.664145	0.697288	0.743992	0.755642	0.796234	0.733716	0.775419	0.810852	0.820871	0.766056	0.718891	0.815395	0.88052	0.990852	0.996007	1.08505	1.2555
	7	0.787625	0.794188	0.845855	0.877235	0.839866	0.815668	0.835906	0.904338	0.834813	0.842592	0.775277	0.783485	0.803453	0.914257	0.974918	1.08172	1.18341
	8	0.832636	0.836117	0.88427	0.92116	0.901078	0.9375	0.906083	0.867363	0.849342	0.762812	0.756373	0.710207	0.721128	0.855654	0.933301	1.01364	1.1099
	9	0.776199	0.782385	0.799348	0.856589	0.920577	0.853249	0.814627	0.828312	0.750012	0.689658	0.708067	0.685553	0.691881	0.752061	0.890299	0.964913	1.12696
	10	0.714961	0.767991	0.74797	0.780732	0.853692	0.807579	0.791751	0.77698	0.692518	0.654922	0.629382	0.615888	0.611488	0.691972	0.835088	0.904724	1.07066
	11	0.673771	0.775111	0.740468	0.83011	0.830289	0.798438	0.82675	0.725294	0.705806	0.627542	0.604599	0.581548	0.597232	0.642523	0.775942	0.871773	1.03555
	12	0.642316	0.682614	0.688296	0.771347	0.74904	0.800912	0.83091	0.788031	0.726732	0.619085	0.590479	0.574034	0.58126	0.660513	0.783179	0.891884	1.0518
	13	0.644207	0.649475	0.668299	0.74051	0.720277	0.727381	0.744984	0.750269	0.743659	0.667928	0.596107	0.640333	0.661606	0.736742	0.796885	0.956413	1.13488
	14		0.639193	0.658945	0.700774	0.692464	0.641493	0.699052	0.779597	0.769797	0.739235	0.700387	0.718157	0.800314	0.875824	0.940482	1.16935
	15			0.626985	0.661308	0.73167	0.635087	0.697031	0.727404	0.821584	0.808088	0.766643	0.815822	0.974683	1.02011	0.992989
	16				0.651462	0.670362	0.64766	0.688247	0.727558	0.787625	0.811296	0.787112	0.830974	0.918002	0.959748
	17					0.615144	0.625672	0.660131	0.674349	0.790485	0.855895	0.830546	0.915637	0.934919
3	1					0.65073	0.690839	0.653817	0.682595	0.663413	0.717908	0.72762	0.708454						3																		3
	2					0.646569	0.739294	0.714026	0.748494	0.708227	0.788622	0.815676	0.827166	0.86773
	3			0.565951	0.586017	0.620011	0.749687	0.733206	0.753526	0.7831	0.738484	0.768905	0.824911	0.969189	1.04494
	4		0.584013	0.617946	0.594578	0.615176	0.72096	0.691865	0.729426	0.761557	0.749624	0.748726	0.827335	0.892519	1.01041	1.18207
	5	0.556084	0.647573	0.66143	0.644442	0.652523	0.738949	0.721463	0.775213	0.786161	0.748309	0.728547	0.840275	0.876315	0.968076	1.08089	1.2555
	6	0.648498	0.701241	0.745397	0.719448	0.799277	0.806125	0.840311	0.844329	0.777565	0.817055	0.729337	0.771789	0.832167	0.909689	1.00049	1.09457	1.26893
	7	0.721632	0.800339	0.815497	0.82039	0.820652	0.839984	0.827815	0.847907	0.829911	0.805833	0.79011	0.736437	0.771904	0.931671	1.01686	1.05782	1.19165
	8	0.824149	0.807571	0.867063	0.893771	0.845684	0.875921	0.905666	0.858367	0.822201	0.79949	0.759392	0.767482	0.74762	0.898517	0.987346	1.04646	1.10954
	9	0.76481	0.789005	0.763397	0.875018	0.906867	0.87325	0.797178	0.772808	0.741505	0.73246	0.728298	0.716993	0.696669	0.763491	0.875608	0.996801	1.1392
	10	0.717268	0.780649	0.725936	0.825302	0.905309	0.895983	0.853285	0.728781	0.672796	0.630763	0.619527	0.680016	0.648418	0.697623	0.816902	0.860699	0.973416
	11	0.700989	0.75484	0.787882	0.875258	0.908349	0.902358	0.798874	0.697206	0.679189	0.648816	0.615122	0.655869	0.643665	0.69365	0.790321	0.825562	0.934137
	12	0.6885	0.712303	0.721194	0.718188	0.706616	0.835025	0.738612	0.745336	0.722688	0.644434	0.585396	0.578574	0.607372	0.663253	0.782069	0.864868	1.0247
	13	0.610825	0.685515	0.68605	0.741386	0.697659	0.710713	0.705491	0.719069	0.674987	0.633615	0.588105	0.591041	0.661156	0.733173	0.81343	0.965195	1.05159
	14		0.603119	0.671168	0.67183	0.677887	0.628975	0.633322	0.701452	0.708553	0.676684	0.655171	0.67887	0.756863	0.81255	0.875424	1.07315
	15			0.62454	0.6628	0.644591	0.659271	0.716995	0.751881	0.797137	0.771159	0.782286	0.80383	0.86502	0.939509	0.956532
	16				0.586586	0.639946	0.654406	0.690712	0.718476	0.812761	0.897892	0.859938	0.847309	0.910381	1.00012
	17					0.632823	0.60724	0.633371	0.682282	0.806948	0.92035	0.947941	0.911288	0.938361
4	1					0.640627	0.677074	0.665721	0.654171	0.690659	0.717113	0.754262	0.758242						4																		4
	2					0.633952	0.660123	0.704704	0.759924	0.751771	0.806766	0.854497	0.90041	0.924931
	3			0.563603	0.570435	0.618321	0.697895	0.72742	0.758339	0.788443	0.781637	0.794351	0.840605	0.974585	1.08222
	4		0.582348	0.629753	0.582985	0.620853	0.684977	0.695685	0.714314	0.748558	0.752942	0.736939	0.789696	0.865811	1.0576	1.18669
	5	0.592239	0.622687	0.64283	0.629021	0.659614	0.708869	0.714976	0.762899	0.754998	0.683943	0.725134	0.76008	0.84388	1.00854	1.08722	1.14836
	6	0.628931	0.694374	0.726124	0.71989	0.766809	0.789114	0.816808	0.814794	0.800758	0.731557	0.741092	0.759343	0.862906	0.979802	1.00957	1.07025	1.24205
	7	0.736406	0.818868	0.76584	0.838438	0.830853	0.875452	0.902546	0.902336	0.875478	0.819309	0.750941	0.77575	0.849567	0.927102	0.966978	1.04963	1.13416
	8	0.821804	0.818646	0.833657	0.865013	0.893102	0.876911	0.852364	0.869489	0.887781	0.795352	0.762143	0.752051	0.773927	0.86405	0.987953	0.986006	1.14611
	9	0.78517	0.776072	0.775982	0.811866	0.885396	0.892724	0.825484	0.776337	0.766282	0.73739	0.702996	0.711498	0.707105	0.783455	0.878425	0.945138	1.10709
	10	0.743712	0.762219	0.773192	0.763432	0.84527	0.85399	0.787158	0.752314	0.66905	0.623861	0.642031	0.632775	0.660562	0.683887	0.811688	0.879053	1.02148
	11	0.690118	0.756532	0.805054	0.874233	0.864535	0.854909	0.76668	0.730507	0.69494	0.604441	0.642853	0.61026	0.631838	0.650386	0.831763	0.855477	0.963348
	12	0.691489	0.749405	0.778181	0.785034	0.812789	0.827841	0.812049	0.80475	0.696512	0.625495	0.62229	0.611728	0.657202	0.699919	0.815003	0.920044	1.05074
	13	0.651362	0.710207	0.72437	0.688066	0.721071	0.691032	0.700458	0.782057	0.719973	0.665539	0.64295	0.644447	0.712728	0.756205	0.850607	0.980481	1.11295
	14		0.66802	0.642951	0.641586	0.694825	0.623967	0.685599	0.732742	0.726648	0.692673	0.667164	0.731358	0.79709	0.901894	0.90667	1.09289
	15			0.612711	0.66468	0.64192	0.662455	0.651979	0.72315	0.752666	0.782625	0.746441	0.838159	0.911913	1.00145	0.990026
	16				0.610036	0.633127	0.615438	0.652255	0.678847	0.75586	0.797319	0.794985	0.827949	0.918053	1.00751
	17					0.596149	0.615043	0.60888	0.670642	0.78918	0.824225	0.860288	0.891138	0.933409
5	1					0.624052	0.639731	0.666846	0.720656	0.68207	0.687626	0.725906	0.708076						5																		5
	2					0.624689	0.65929	0.701592	0.668672	0.719041	0.806182	0.822006	0.862029	0.924285
	3			0.563258	0.589216	0.597582	0.640012	0.685814	0.713013	0.721626	0.751942	0.809815	0.85062	0.963442	1.17709
	4		0.615707	0.620079	0.588941	0.576424	0.630994	0.64589	0.686527	0.751631	0.743231	0.748692	0.800839	0.928276	1.12593	1.25459
	5	0.602329	0.65655	0.630586	0.636668	0.648024	0.649053	0.708653	0.725621	0.716629	0.72742	0.76129	0.797148	0.898478	0.997883	1.13583	1.35565
	6	0.648772	0.65532	0.723686	0.705669	0.761153	0.790567	0.806247	0.861299	0.837177	0.794211	0.766211	0.798057	0.855941	0.963427	1.06042	1.14236	1.3152
	7	0.713006	0.763129	0.756874	0.776005	0.737265	0.831941	0.890995	0.989849	0.928283	0.845555	0.791095	0.772371	0.844005	1.00018	1.06505	1.14301	1.26561
	8	0.773546	0.811627	0.801975	0.788707	0.84073	0.829914	0.932066	0.952013	0.897102	0.839708	0.756575	0.768276	0.762728	0.901669	1.02242	1.05335	1.17636
	9	0.716376	0.716323	0.716734	0.799042	0.829208	0.852172	0.860143	0.856233	0.773404	0.738962	0.727129	0.731982	0.738209	0.830174	0.912776	1.01945	1.14535
	10	0.663134	0.715412	0.726324	0.797142	0.829035	0.909001	0.832515	0.800233	0.680942	0.661142	0.711582	0.670468	0.664053	0.715684	0.808831	0.906329	1.01542
	11	0.640554	0.723467	0.766569	0.840926	0.867426	0.831857	0.822311	0.772126	0.697287	0.676002	0.620956	0.617492	0.628226	0.709062	0.852543	0.92159	1.01095
	12	0.652866	0.713587	0.693285	0.737028	0.7505	0.824643	0.780295	0.785884	0.702203	0.657242	0.589247	0.617965	0.610337	0.713789	0.85835	1.03009	1.06469
	13	0.625426	0.68134	0.676758	0.717633	0.745883	0.735676	0.749844	0.748492	0.70009	0.626823	0.616669	0.628498	0.735324	0.805883	0.877256	1.03529	1.19891
	14		0.613805	0.635702	0.673716	0.624989	0.607545	0.650668	0.734344	0.724911	0.666674	0.682904	0.781924	0.884625	0.898538	0.94921	1.13702
	15			0.595486	0.607787	0.612361	0.604259	0.645709	0.746281	0.776162	0.788212	0.80203	0.85641	0.976205	1.00703	0.999694
	16				0.550055	0.613966	0.615312	0.69237	0.731823	0.817001	0.828694	0.864381	0.910297	1.01467	1.07969
	17					0.598538	0.604642	0.669331	0.708368	0.839821	0.816972	0.901083	0.938392	0.995011
6	1					0.641223	0.661544	0.643363	0.680837	0.65731	0.747323	0.749538	0.760776						6																		6
	2					0.648473	0.70261	0.72658	0.699267	0.719741	0.806086	0.854815	0.870601	0.921635
	3			0.605137	0.624097	0.639441	0.678543	0.771799	0.762524	0.759348	0.768506	0.838993	0.870322	0.981409	1.09362
	4		0.582758	0.623105	0.644351	0.612218	0.657894	0.714177	0.731589	0.753667	0.817991	0.768852	0.827904	0.910331	1.03726	1.18914
	5	0.600055	0.601613	0.619219	0.667536	0.692638	0.663765	0.678812	0.719055	0.714209	0.719308	0.715622	0.771647	0.907933	1.03458	1.07	1.27122
	6	0.646588	0.692999	0.719419	0.732893	0.703029	0.76103	0.745877	0.826714	0.772252	0.763093	0.744923	0.797612	0.844953	0.97331	1.073	1.14327	1.30839
	7	0.734821	0.743806	0.759403	0.796415	0.723267	0.817961	0.864843	0.912748	0.806266	0.774277	0.710123	0.744241	0.807035	0.990914	1.07383	1.17887	1.23051
	8	0.786764	0.784731	0.810635	0.764955	0.822464	0.852321	0.890193	0.895339	0.873629	0.769243	0.740226	0.755836	0.769745	0.914881	1.07049	1.16336	1.2503
	9	0.70934	0.736615	0.716485	0.785282	0.822916	0.837437	0.840664	0.816795	0.783129	0.682003	0.687452	0.720653	0.77496	0.805517	0.922614	1.04404	1.28643
	10	0.700965	0.726703	0.705734	0.760603	0.844602	0.854855	0.842202	0.7477	0.708029	0.666792	0.658045	0.68155	0.694033	0.751111	0.86017	0.989078	1.10518
	11	0.740419	0.745209	0.797809	0.794254	0.81556	0.889806	0.841096	0.761143	0.716172	0.629102	0.632123	0.65536	0.672599	0.727022	0.884966	0.960794	1.09889
	12	0.704619	0.761625	0.742509	0.7391	0.740631	0.831766	0.791839	0.760422	0.756712	0.652707	0.607595	0.653971	0.650371	0.741526	0.79195	0.963921	1.11104
	13	0.673989	0.714912	0.689408	0.702861	0.706436	0.707964	0.702268	0.741085	0.744939	0.628013	0.611409	0.637144	0.703549	0.757453	0.831476	1.03151	1.11427
	14		0.617248	0.664315	0.679495	0.633804	0.604968	0.607677	0.71678	0.721983	0.689839	0.643893	0.734684	0.786957	0.84123	0.906161	1.06553
	15			0.574663	0.625227	0.618665	0.603338	0.656178	0.687631	0.769457	0.791311	0.759313	0.812868	0.890668	0.928076	0.918601
	16				0.567756	0.619228	0.611137	0.665222	0.676556	0.766803	0.842899	0.826661	0.844127	0.920595	0.994445
	17					0.5999	0.591061	0.653511	0.6777	0.77967	0.900681	0.869322	0.961974	1.002
7	1					0.679408	0.683645	0.633067	0.667615	0.671803	0.71912	0.741166	0.754024						7																		7
	2					0.642328	0.661332	0.661458	0.680893	0.712779	0.774423	0.864756	0.887946	0.990204
	3			0.559542	0.614538	0.615713	0.705663	0.729158	0.749149	0.739769	0.758466	0.77525	0.832164	1.00067	1.09325
	4		0.56974	0.607675	0.607078	0.664619	0.678355	0.732635	0.776277	0.749741	0.754976	0.790572	0.855835	0.938769	1.09245	1.26428
	5	0.56709	0.595158	0.619073	0.649203	0.679641	0.750618	0.718923	0.731938	0.734971	0.702607	0.73992	0.800825	0.913661	1.00882	1.13104	1.32916
	6	0.631493	0.644844	0.702985	0.753958	0.803598	0.754257	0.774059	0.777735	0.750601	0.738588	0.705145	0.786005	0.897821	0.981493	1.0351	1.14329	1.17605
	7	0.690811	0.76661	0.758511	0.819686	0.774304	0.793369	0.894247	0.979368	0.866634	0.816908	0.750392	0.759278	0.826738	0.952182	1.03183	1.05556	1.13675
	8	0.725973	0.727762	0.749475	0.86021	0.87648	0.834478	0.924255	0.837335	0.821357	0.763161	0.734629	0.712172	0.712619	0.818839	0.907566	0.966411	1.13592
	9	0.667334	0.714392	0.704467	0.806264	0.801828	0.865942	0.820988	0.813331	0.756783	0.719245	0.706041	0.656395	0.674242	0.70572	0.841646	0.922704	1.12757
	10	0.672279	0.70185	0.716489	0.738863	0.795141	0.777742	0.741411	0.779859	0.707047	0.6885	0.674781	0.676259	0.639697	0.664793	0.797296	0.868969	1.00609
	11	0.688301	0.754129	0.815104	0.814969	0.875499	0.850677	0.756075	0.734911	0.69852	0.653273	0.630065	0.64424	0.604122	0.634074	0.765128	0.869285	1.00937
	12	0.646952	0.671804	0.735973	0.763478	0.714826	0.827199	0.812941	0.762729	0.726343	0.646726	0.60521	0.615875	0.639484	0.670088	0.817219	0.899267	1.05737
	13	0.637951	0.654039	0.699467	0.770101	0.744785	0.704492	0.739791	0.735509	0.695655	0.607917	0.571087	0.62298	0.679049	0.744554	0.825997	0.9393	1.07846
	14		0.625805	0.64333	0.665618	0.673472	0.634095	0.652928	0.685853	0.713374	0.678991	0.657414	0.744536	0.826668	0.874948	0.927243	1.1059
	15			0.598427	0.620209	0.684107	0.708046	0.680134	0.722602	0.749614	0.792866	0.750389	0.793279	0.879138	0.967747	0.992933
	16				0.611411	0.667946	0.693704	0.740581	0.697875	0.75717	0.787507	0.838776	0.837014	0.9294	1.03639
	17					0.602411	0.647048	0.64956	0.692435	0.789194	0.863811	0.894722	0.871472	0.867265
8	1					0.707046	0.67993	0.636617	0.704784	0.722625	0.75235	0.754535	0.762574						8																		8
	2					0.629932	0.659936	0.659158	0.695904	0.737212	0.820511	0.826221	0.871701	0.950525
	3			0.563232	0.601352	0.630145	0.725765	0.700583	0.691819	0.733083	0.792921	0.85503	0.87574	0.995542	1.14558
	4		0.595028	0.600766	0.582284	0.583163	0.68469	0.69007	0.716683	0.754643	0.763098	0.818036	0.893499	0.906713	1.04499	1.28262
	5	0.600272	0.685824	0.645695	0.645572	0.650538	0.690883	0.672554	0.724635	0.717225	0.742169	0.739458	0.809723	0.961109	1.04897	1.15919	1.37014
	6	0.710715	0.73025	0.764107	0.769338	0.762661	0.810365	0.776615	0.848022	0.810338	0.77114	0.763376	0.801352	0.930827	0.990925	1.05642	1.2033	1.2413
	7	0.78244	0.773845	0.787854	0.823993	0.809538	0.838543	0.866928	0.914053	0.887757	0.883629	0.77256	0.796677	0.852427	0.923741	1.04996	1.15882	1.22797
	8	0.758151	0.845184	0.865446	0.88213	0.855343	0.813196	0.844535	0.875174	0.889276	0.840572	0.758693	0.784407	0.795684	0.844093	1.01636	1.07265	1.20823
	9	0.746829	0.747845	0.764772	0.876013	0.879512	0.82164	0.816846	0.804262	0.76674	0.727317	0.710119	0.673173	0.737635	0.798954	0.95391	1.06268	1.14617
	10	0.736039	0.819568	0.807714	0.864268	0.863468	0.859541	0.837378	0.757405	0.703746	0.640805	0.628938	0.632628	0.630551	0.75552	0.902742	0.98522	1.10225
	11	0.731692	0.770135	0.818105	0.852039	0.911202	0.892106	0.834897	0.734322	0.692109	0.670943	0.633461	0.60816	0.635303	0.681212	0.9013	0.956981	1.05482
	12	0.72581	0.763116	0.754973	0.77851	0.787741	0.873081	0.837376	0.761466	0.671286	0.632617	0.632683	0.637476	0.66274	0.745211	0.847044	0.952906	1.10556
	13	0.628648	0.7245	0.702496	0.731279	0.741986	0.789996	0.744479	0.80066	0.735195	0.646203	0.622716	0.691216	0.766072	0.787197	0.864834	0.997986	1.14457
	14		0.656281	0.640502	0.656149	0.627073	0.641151	0.664502	0.779723	0.757873	0.753487	0.704349	0.788242	0.905737	0.926988	0.964286	1.16019
	15			0.595421	0.644658	0.615491	0.640843	0.683424	0.749742	0.804895	0.84161	0.860976	0.88791	1.00089	1.06344	1.00751
	16				0.637881	0.63688	0.673395	0.66911	0.706305	0.826017	0.946204	0.921767	0.950159	0.953683	0.992402
	17					0.607394	0.645161	0.667128	0.703496	0.842626	0.969688	0.931484	0.932555	0.97409
9	1					0.64086	0.692826	0.690937	0.758063	0.698643	0.722888	0.752064	0.816972						9																		9
	2					0.660332	0.707178	0.702332	0.746526	0.738111	0.845339	0.878956	0.905464	0.994846
	3			0.575858	0.620587	0.633847	0.711043	0.734193	0.794653	0.760456	0.805549	0.820431	0.869843	1.0104	1.12158
	4		0.607523	0.600976	0.624972	0.626726	0.664569	0.70348	0.763916	0.795597	0.78017	0.794737	0.877254	0.996753	1.10783	1.21119
	5	0.621317	0.654559	0.632011	0.660414	0.702994	0.772769	0.741814	0.807274	0.797529	0.745737	0.74969	0.837405	0.898462	1.01701	1.08846	1.17097
	6	0.656176	0.695004	0.734458	0.736164	0.771337	0.813541	0.841811	0.856901	0.831496	0.767592	0.748584	0.78612	0.862795	0.958194	1.00144	1.11652	1.27983
	7	0.755761	0.82811	0.860822	0.794534	0.86386	0.848799	0.951091	0.955494	0.902489	0.819498	0.777467	0.745847	0.812746	0.927692	0.962507	1.09047	1.2087
	8	0.827448	0.824431	0.871452	0.891665	0.909004	0.846509	0.943651	0.959632	0.84312	0.780707	0.743526	0.719726	0.734266	0.902875	1.02638	1.00707	1.16815
	9	0.770557	0.803731	0.80923	0.948709	0.980592	0.900005	0.881915	0.866238	0.78079	0.734229	0.669539	0.723113	0.730727	0.787281	0.989863	1.02291	1.18401
	10	0.736554	0.741119	0.784716	0.807697	0.866779	0.862762	0.85821	0.809583	0.712681	0.679472	0.63143	0.679581	0.657655	0.717167	0.898627	0.959817	1.14764
	11	0.757464	0.795947	0.831571	0.848913	0.916225	0.907789	0.822907	0.736936	0.700064	0.627872	0.63042	0.645324	0.637095	0.677498	0.824929	0.898967	1.02579
	12	0.724636	0.749146	0.732158	0.747273	0.753813	0.808045	0.745441	0.743569	0.69259	0.641579	0.594301	0.609356	0.619291	0.695825	0.823454	0.922555	1.01204
	13	0.753092	0.748446	0.725639	0.739139	0.70144	0.770487	0.71812	0.724722	0.703125	0.652728	0.597312	0.627093	0.708192	0.748568	0.82354	0.967704	1.06695
	14		0.693245	0.671049	0.7213	0.669979	0.663225	0.655089	0.722871	0.755103	0.698731	0.694006	0.732389	0.799363	0.835798	0.87814	1.03249
	15			0.602595	0.617708	0.643096	0.646455	0.667799	0.749657	0.801493	0.767175	0.801264	0.860593	0.914882	0.965052	1.00264
	16				0.609613	0.627057	0.643387	0.657114	0.712103	0.781676	0.820285	0.860803	0.917475	0.982651	1.00963
	17					0.588155	0.6495	0.656132	0.71315	0.779174	0.853307	0.926897	0.907741	0.932703
10	1					0.653229	0.679042	0.652184	0.712314	0.700916	0.737706	0.760372	0.763087						10																		10
	2					0.654044	0.714447	0.690468	0.704516	0.741337	0.789042	0.867018	0.873637	0.927554
	3			0.578954	0.618291	0.654715	0.729418	0.731269	0.7574	0.815134	0.760232	0.857393	0.856368	0.973413	1.11691
	4		0.546973	0.571046	0.588587	0.619027	0.684703	0.675141	0.759341	0.761475	0.765366	0.755994	0.807563	0.922314	1.07625	1.20959
	5	0.547678	0.568808	0.591017	0.613164	0.626412	0.727323	0.671462	0.762891	0.755426	0.735996	0.788867	0.852507	0.868336	1.04503	1.1537	1.24657
	6	0.639432	0.660565	0.646197	0.660341	0.701026	0.74036	0.789665	0.762217	0.851145	0.766348	0.714619	0.770732	0.835084	0.942544	1.03315	1.1291	1.31674
	7	0.734909	0.703052	0.693827	0.738792	0.775649	0.808818	0.962457	0.944059	0.934331	0.872488	0.718027	0.719426	0.78636	0.847469	0.97018	1.05789	1.16308
	8	0.797089	0.728227	0.7613	0.805329	0.834076	0.837513	0.847225	0.929046	0.936067	0.792791	0.713517	0.680101	0.69717	0.839112	0.920869	0.977379	1.07964
	9	0.70895	0.759695	0.777098	0.841117	0.865345	0.848836	0.827169	0.771303	0.80803	0.686959	0.679119	0.674309	0.700258	0.735202	0.864378	0.966679	1.08047
	10	0.714371	0.72221	0.766823	0.823322	0.857265	0.867325	0.811044	0.744474	0.699939	0.664242	0.700684	0.644782	0.608117	0.662935	0.82358	0.910454	1.00749
	11	0.711734	0.746351	0.742756	0.836943	0.922533	0.918099	0.805541	0.734173	0.686031	0.625616	0.632882	0.618545	0.598622	0.59439	0.771945	0.860972	0.95364
	12	0.644538	0.727561	0.725136	0.714719	0.746234	0.820287	0.812917	0.753725	0.733501	0.625134	0.599067	0.603061	0.622437	0.651186	0.725524	0.818528	0.959827
	13	0.614762	0.673225	0.670253	0.672883	0.733538	0.748556	0.72444	0.75862	0.714532	0.605878	0.589121	0.603015	0.657356	0.712659	0.735707	0.853391	1.00999
	14		0.615824	0.621462	0.665633	0.683844	0.641539	0.645575	0.741577	0.722795	0.701771	0.646641	0.715092	0.794738	0.816247	0.847257	0.989417
	15			0.580978	0.619985	0.672473	0.650514	0.648929	0.69017	0.74917	0.750787	0.75201	0.850048	0.905575	0.920608	0.947904
	16				0.633237	0.669886	0.681841	0.673299	0.700452	0.732998	0.806878	0.82048	0.865367	0.901707	0.986131
	17					0.569651	0.618584	0.649152	0.699291	0.755594	0.839546	0.899948	0.85903	0.89977

## Sheet: Pref
Preferentiality
Signals of insufficient quality were excluded from the property maps. Signals could be rejected based on noise low amplitude, large artefact or ventricluar farfields that could not be substracted.
		1	2	3	4	5	6	7	8	9	10	11	12	13	14	15	16	17
1	1					0.577819	2.00702	2.12031	0.589234	1.87422	1.88638	1.90936	1.93335						1																		1
	2					2.01517	2.16361	2.52273	2.84486	2.57283	2.16114	1.80265	1.84828	1.82628
	3			1.91595	2.16707	2.36801	2.39175	2.50009	2.51281	2.78059	2.25547	1.52008	1.18763	1.39843	1.5434
	4		1.76207	2.06924	2.18211	2.36776	2.38119	2.49197	2.50371	2.67577	2.57761	2.84878	0.898374	1.05546	1.1637	1.17847
	5	1.55419	1.67768	1.85584	1.99471	2.30858	2.54535	2.6086	2.39596	2.79638	3.02404	0.517134	0.933448	0.898948	0.977211	0.847759	0.980489
	6	1.48081	1.48826	1.29028	1.8488	2.03841	2.60618	2.67569	2.93045	2.71711	3.13984	0.178813	0.637185	0.723448	0.819553	0.886084	1.03462	1.13636
	7	0.978299	0.990728	0.83126	1.15083	1.22166	1.12137	0.522692	0.12375	2.67648	0.030082	0.24213	0.81528	0.59714	0.774978	0.810865	0.950084	1.04824
	8	0.373165	0.606609	0.712397	0.927506	0.868708	0.77092	0.741026	0.761013	2.47605	2.62574	0.413673	1.52992	0.602021	0.790499	0.898123	0.956879	1.06573
	9	0.72707	0.980188	1.06838	1.04918	0.950909	0.776834	0.753043	1.0028	1.40557	2.07268	1.23995	2.09659	1.92602	2.24959	2.08408	1.62518	1.50394
	10	1.33685	1.35469	1.24606	1.11371	1.00413	0.848297	0.860881	0.997425	0.729439	1.03634	1.191	1.35275	1.92448	2.1471	2.19789	2.13285	1.89405
	11	1.74033	1.54079	1.26579	1.16206	1.10174	1.04975	1.10064	1.25539	1.35202	1.33728	1.21463	1.51584	1.65133	1.92973	2.08924	2.09943	1.96856
	12	2.20373	1.71712	1.43846	1.21632	1.14423	1.07594	1.1899	1.23033	1.29219	1.42689	1.5246	1.52216	1.5021	1.64934	1.78969	1.93284	1.84816
	13	2.39957	1.67998	1.21306	1.14635	1.10335	1.02385	1.16311	1.26913	1.43774	1.55401	1.5885	1.49792	1.50716	1.65024	1.74296	1.80533	1.78252
	14		2.09354	1.19295	1.09952	1.07681	1.08203	1.11573	1.35747	1.46504	1.67659	1.64803	1.53604	1.51752	1.64065	1.80422	1.85505
	15			1.33546	1.26891	1.11336	1.20891	1.88214	1.82551	1.956	1.92004	2.15222	1.99036	1.44322	1.54344	2.14047
	16				1.63939	1.5637	1.78588	2.14249	2.0415	2.00365	2.04765	2.26231	2.31617	1.58334	1.34173
	17					1.70447	1.78389	1.94398	2.03479	2.02717	2.13152	2.43344	2.41024	1.45054
2	1					0.823213	1.10316	0.765654	1.37534	1.87919	1.85115	1.85816	1.8566						2																		2
	2					1.63477	2.05097	2.05963	2.2016	2.35778	2.0195	1.76765	1.70847	1.74331
	3			2.08972	2.26318	2.3559	2.34995	2.38365	2.5038	2.55848	2.16397	1.75235	1.50784	1.29433	1.29719
	4		1.8972	2.32868	2.38071	2.37463	2.33765	2.38989	2.46798	2.69971	2.59804	1.63407	1.14457	1.07533	1.07344	1.0833
	5	1.52019	1.8082	2.12014	2.25289	2.2866	2.4627	2.49859	2.47121	2.70142	2.97562	2.34345	1.19835	1.00974	1.05496	0.848939	0.973329
	6	1.18094	1.51371	1.62123	2.00886	2.15607	2.44975	2.46651	2.5262	2.68142	3.00981	0.108947	1.34285	0.957418	0.824989	0.814424	0.928245	1.12833
	7	0.713001	0.857917	0.772852	1.04993	1.22625	0.341757	3.06325	2.87098	2.79608	2.85801	0.240734	1.76159	0.605507	0.783358	0.89993	0.968628	1.09323
	8	0.156195	0.274357	0.573144	0.723217	0.83079	0.616154	0.669496	0.682245	2.31026	2.7913	1.19269	1.49543	1.40023	1.06985	1.14255	1.01185	1.04436
	9	3.03286	0.263402	0.79293	0.843616	0.861144	0.786427	0.822314	0.945834	1.15897	1.34753	1.87315	1.85762	2.09322	2.27009	1.86721	1.37942	1.28899
	10	2.42916	1.70826	1.26617	1.06331	0.892614	0.825193	0.946044	1.06714	1.30564	1.19591	1.30737	1.89041	2.02802	2.10803	2.0814	2.03797	1.78413
	11	2.1081	1.71863	1.18764	1.05929	1.00878	0.940662	1.06336	1.23171	1.25846	1.19832	1.29774	1.59046	1.74962	2.06065	2.14308	2.06813	1.87416
	12	2.27523	1.11057	1.23503	1.24152	1.25306	1.13587	1.19694	1.34939	1.36368	1.50244	1.56398	1.467	1.5389	1.82247	1.94605	1.96989	1.82622
	13	2.65766	0.507726	0.940237	1.23509	1.25635	1.2839	1.29248	1.39568	1.5197	1.59537	1.56248	1.43549	1.6578	1.81217	1.92484	1.88297	1.77697
	14		2.6705	1.34274	1.28192	1.18429	1.43465	1.68693	1.61996	1.61119	1.51595	1.56734	1.37317	1.54316	1.8742	2.05558	1.94046
	15			1.40781	1.3518	1.31415	1.84044	2.08781	1.79465	1.66178	1.77236	2.06807	1.23403	1.3032	1.65478	2.4544
	16				1.77754	1.75388	1.94653	2.22327	1.95135	1.79159	1.83455	2.04485	2.04625	1.46117	1.27981
	17					1.89783	1.88309	1.96348	1.87069	1.7668	1.78914	2.30407	2.34582	1.36697
3	1					1.20858	1.23429	1.24239	2.95738	1.87596	1.84081	1.8464	1.81251						3																		3
	2					1.73384	1.85865	2.91462	3.05439	2.58382	1.83461	1.69647	1.70895	1.67223
	3			1.66397	2.0042	2.16283	2.25436	2.36814	2.71603	3.00691	1.81502	1.44175	1.34678	1.37237	1.36775
	4		1.81871	1.99686	2.17392	2.26512	2.2437	2.45244	2.47524	2.8972	1.10053	1.282	1.15864	1.13826	1.17902	1.21376
	5	1.37614	1.57683	1.96332	2.04634	2.1018	2.2343	2.31487	2.46234	2.76488	2.83811	1.72319	1.01801	1.04575	0.983468	0.958442	1.02092
	6	1.18623	1.57393	1.49655	1.93641	2.18479	2.29846	2.31557	2.61628	2.80248	2.8372	0.397145	0.656846	0.920744	0.969119	0.955304	1.01938	1.1661
	7	0.960552	1.08322	0.977189	1.12544	1.24739	3.13645	0.138716	0.0765754	3.02789	0.00132765	0.174232	2.95744	0.388335	0.884988	0.870558	0.966312	1.00802
	8	0.590428	0.727342	0.723563	0.884099	0.691229	0.466854	0.457012	0.434548	3.10934	0.0945326	0.686003	1.67337	0.166446	0.861185	0.986397	0.901079	0.987474
	9	0.121767	0.861667	0.802041	0.992958	0.784359	0.653771	0.566234	0.454714	3.13153	3.10251	2.82843	1.74383	1.9135	2.36312	2.18008	1.78235	1.7158
	10	2.10568	1.48785	1.24963	1.09156	0.9468	0.764963	0.843715	0.798124	0.557757	3.1397	2.06875	1.93756	2.12113	2.14379	2.25962	2.11	1.94333
	11	1.78156	1.62566	1.38165	1.16729	1.06516	0.91077	0.993888	1.09682	1.11026	0.913105	1.1614	1.76549	1.85215	2.01744	2.07092	1.97331	1.90504
	12	1.47218	1.35062	1.37129	1.2179	1.23285	1.18147	1.1582	1.26668	1.39641	1.476	1.67664	1.5565	1.52229	1.74903	1.82487	1.87927	1.75958
	13	2.48355	1.25271	1.16739	1.15449	1.01382	0.925649	1.15484	1.29899	1.50965	1.63325	1.67093	1.5859	1.6213	1.77676	1.85725	1.85364	1.73084
	14		1.34243	1.24552	1.15007	1.07965	1.117	1.14898	1.38837	1.49875	1.60397	1.65477	1.70947	1.61012	1.83577	1.93839	1.95639
	15			1.12996	0.973568	1.05692	0.98223	1.44507	1.60804	1.61372	1.57546	2.02046	1.99631	1.55354	1.60837	2.07701
	16				1.41427	1.40698	1.61959	1.62989	1.76927	1.75811	1.79074	1.99346	0.0544413	1.27515	1.53631
	17					1.65693	1.55402	1.69292	1.72269	1.75684	1.93047	1.998	0.479758	0.497776
4	1					1.53606	1.72484	2.00873	2.31533	1.9445	1.86498	1.87359	1.89056						4																		4
	2					1.85838	1.92562	2.14987	2.58849	2.54124	1.98422	1.76921	1.67451	1.73979
	3			1.86915	2.11414	2.32791	2.24168	2.39222	2.52407	2.57354	2.01385	1.70229	1.31897	1.44647	1.39713
	4		1.80734	2.086	2.25113	2.43986	2.44608	2.38417	2.39514	2.65652	2.15978	1.61844	1.26154	1.17336	1.26901	1.22195
	5	1.52346	1.71219	1.87253	2.14223	2.31958	2.47909	2.40446	2.38764	2.57129	2.64227	2.22225	1.73436	1.24765	1.13711	1.08669	1.14065
	6	1.42552	1.49013	1.56169	1.69699	2.19054	2.1259	2.33083	2.6169	2.36577	2.82235	2.78219	2.25929	0.900546	0.975357	1.00302	1.11041	1.10429
	7	1.0463	1.14778	1.09707	0.9495	0.851496	0.619447	0.360731	3.11046	2.93502	2.74826	0.0504717	2.92739	0.340217	0.739601	0.849973	0.928753	0.993308
	8	0.645723	0.753855	0.821617	0.806576	0.702174	0.703789	0.589532	0.738059	2.103	2.13418	1.70272	2.82032	3.00046	0.558243	0.810655	0.80317	1.02874
	9	0.267514	1.03292	0.550532	0.81511	0.760866	0.744718	0.819628	0.867688	0.961591	2.39107	2.21924	1.80242	2.11977	2.57784	2.81237	2.99796	1.69497
	10	2.51965	1.56094	1.14716	0.847646	0.843626	0.865545	0.988474	1.03679	1.07237	0.986422	1.52008	1.82903	2.00376	2.19688	2.34414	2.17168	1.94968
	11	2.06972	1.65908	1.04401	0.925356	0.924396	0.862507	1.02517	1.21282	1.26485	1.16676	1.48025	1.61396	1.8009	2.06223	2.12325	2.1253	1.98112
	12	2.44905	2.12896	0.901903	1.09504	1.00577	0.950999	1.06033	1.2315	1.37751	1.35106	1.48136	1.4536	1.54543	1.77842	1.88088	1.95782	1.87031
	13	2.75351	0.0469708	0.359757	0.794103	0.670059	0.545064	0.987343	1.26891	1.5442	1.70689	1.54462	1.41319	1.561	1.72215	1.84568	1.87648	1.77473
	14		2.78991	1.15959	1.08319	0.729981	0.116956	0.478124	1.50064	1.62271	1.62976	1.54205	1.57569	1.50263	1.64446	1.81871	1.90364
	15			1.44628	1.11604	1.9596	2.50514	2.19539	1.75346	1.64058	1.5695	1.64624	1.65404	1.32756	1.43706	2.03075
	16				2.15463	2.131	2.20297	2.06992	1.81719	1.74462	1.78137	2.05439	2.13834	1.28816	1.28937
	17					1.91007	1.78902	1.82706	1.82925	1.78337	1.83586	1.9178	1.95875	1.38881
5	1					1.31325	1.56025	1.47893	3.05618	1.86091	1.80904	1.89809	1.90123						5																		5
	2					1.49143	1.70334	1.99571	2.58176	2.52419	1.9113	1.83964	1.73957	1.79856
	3			1.81247	1.98744	2.15294	2.0573	2.44496	2.55799	2.54875	2.43452	2.13569	1.17264	1.40603	1.49719
	4		1.61164	2.00085	2.22559	2.29701	2.25745	2.39713	2.5117	2.69206	2.5875	0.257741	0.673951	1.00571	1.05802	1.17225
	5	1.50722	1.61016	1.75912	2.08531	2.2322	2.34064	2.53024	2.69077	2.66627	2.80981	0.267189	0.675777	0.790764	1.09479	0.962334	1.23446
	6	1.40024	1.44395	1.43405	1.82223	2.29323	2.45497	2.41867	2.72879	2.61444	0.0195554	0.469677	0.56548	0.660413	0.838288	0.973008	1.09272	1.19286
	7	1.09493	0.93792	0.783262	0.753776	0.747279	0.259179	0.250984	2.90384	2.68028	2.80691	0.227444	0.330067	0.533402	0.699026	0.942145	1.00176	1.02344
	8	0.572015	0.656769	0.652464	0.614821	0.597419	0.47832	0.466913	0.550088	0.00431701	2.22599	2.38898	2.43199	2.87775	2.7649	1.05668	0.905152	0.991354
	9	0.552582	0.640199	0.764617	0.841997	0.78814	0.670732	0.711757	0.923337	0.848092	2.73606	1.9841	1.82921	2.00746	2.07437	2.53455	2.8343	1.38044
	10	1.80868	1.50609	1.04463	1.18962	0.972214	0.835417	0.970175	1.17942	1.17061	0.862176	1.68124	1.77742	1.93928	2.06686	2.2211	2.02593	1.85327
	11	1.80179	1.51749	1.23094	1.14508	0.937245	1.0885	1.27642	1.34561	1.32983	1.19247	1.32617	1.43898	1.66079	1.95901	1.96667	1.99824	1.94187
	12	2.36108	1.50313	1.18798	1.28834	1.23718	1.39131	1.37364	1.47809	1.43638	1.3898	1.49864	1.50691	1.39332	1.64345	1.82024	1.89476	1.84229
	13	2.63795	1.58845	0.666161	0.902102	1.02807	1.09366	1.1337	1.38274	1.5375	1.61075	1.53164	1.52123	1.50807	1.63564	1.80202	1.83802	1.80197
	14		1.5153	1.04315	1.17823	0.958449	0.777192	0.79207	1.34707	1.59028	1.68879	1.70919	1.68912	1.60782	1.65767	1.82342	1.84108
	15			1.34243	1.27337	1.13405	1.00416	1.96802	1.84778	1.77623	1.90373	2.06239	1.99745	1.73036	1.62144	1.97317
	16				1.72803	1.52105	1.70924	1.76215	1.92322	1.87134	2.0303	2.14444	2.26567	1.80587	1.58811
	17					1.60955	1.60048	1.71072	1.92547	2.06211	2.11284	2.17898	2.01435	1.60885
6	1					0.919779	1.0329	0.923787	0.168066	1.85914	1.88758	1.89202	1.94297						6																		6
	2					1.54277	1.91892	0.129461	3.02915	2.86231	1.76001	1.67686	1.70311	1.81511
	3			1.71191	2.2955	2.36287	2.51321	2.53041	2.83043	2.52371	2.59461	1.08023	1.1361	1.25157	1.30378
	4		1.7558	1.88604	2.22014	2.38235	2.36509	2.46895	2.55854	2.91163	3.03641	0.501096	0.869978	0.94686	1.00757	1.08595
	5	1.58415	1.59512	1.79566	2.03818	2.25454	2.33288	2.23359	2.35439	2.80368	0.159476	0.409466	0.675317	0.732628	0.831632	0.792553	0.976226
	6	1.45085	1.5567	1.41346	1.72592	2.36956	2.46156	2.3429	2.51084	2.65811	2.9466	0.398998	0.347318	0.555466	0.61341	0.732827	0.956419	1.09707
	7	1.23306	1.15989	0.995689	1.0823	1.23618	2.66969	2.31511	2.23915	2.34847	3.00533	0.120253	0.246537	0.354172	0.600642	0.759303	0.921989	0.972315
	8	0.651849	0.732577	0.689031	0.796099	0.728507	0.514811	0.523219	0.973251	2.61073	3.0988	0.0895814	0.242822	0.219599	0.388191	0.905036	1.01206	0.950437
	9	0.400451	0.890143	0.894187	0.986622	0.879786	0.786958	0.834652	1.05784	0.541476	2.80996	2.81932	2.75704	2.0779	2.98165	2.99389	0.825468	1.32263
	10	1.21422	1.30546	1.30252	1.19513	0.996711	1.056	1.03994	1.0649	1.09671	0.799617	0.71662	1.63962	1.9835	2.05236	2.22953	2.00619	1.76312
	11	1.84712	1.59278	1.46167	1.15249	1.09322	1.12976	1.1122	1.33096	1.31292	1.08534	1.09379	1.39539	1.8269	2.0258	2.07497	2.0415	1.91427
	12	1.99383	1.7083	1.55536	1.35284	1.56516	1.24694	1.23028	1.43218	1.41359	1.36286	1.46453	1.4742	1.41372	1.76523	1.89598	1.88859	1.85649
	13	2.33217	1.41751	1.25142	1.36931	1.34766	1.79377	1.40896	1.40432	1.54584	1.52229	1.58304	1.4976	1.5079	1.66105	1.91948	1.9393	1.79742
	14		1.71386	1.29682	1.27167	1.34452	1.39945	1.60368	1.47867	1.56827	1.62336	1.56058	1.52429	1.51158	1.6295	1.91487	1.95332
	15			1.3924	1.44754	1.50473	1.8085	1.96429	1.80648	1.74678	1.78567	1.9572	1.69484	1.52244	1.59137	2.20042
	16				1.69202	1.52056	1.70266	1.77936	1.89557	1.84711	1.79833	1.88597	1.94414	1.49661	1.36603
	17					1.55968	1.58283	1.7794	1.92597	1.91736	1.90658	2.00157	1.41468	1.01564
7	1					1.43608	1.67751	2.4343	1.06068	1.80636	1.75453	1.82419	1.82034						7																		7
	2					1.87136	2.07463	2.39142	2.78043	2.62176	1.84969	1.73176	1.61564	1.69725
	3			1.86946	2.14221	2.20319	2.20484	2.45109	2.58983	2.69349	2.23765	1.8127	1.20698	1.41538	1.52128
	4		1.74674	1.96558	2.18114	2.27804	2.30784	2.39876	2.50248	2.80761	3.09801	2.92908	0.155671	1.31176	1.16675	1.2642
	5	1.53135	1.66886	1.76466	1.98769	2.07993	2.35642	2.40916	2.55776	2.90141	2.89904	2.92879	2.78365	0.844581	0.94284	0.955521	1.03687
	6	1.22839	1.41012	1.23408	1.15519	1.95948	2.44896	2.491	2.56061	2.81641	3.05214	2.82109	2.93812	0.0477083	0.761089	0.798013	1.00158	1.08874
	7	0.966291	0.917333	0.845768	0.804998	0.817621	0.0436828	3.14072	0.0621952	2.84318	3.09202	0.138139	3.05158	0.00108027	0.457885	0.768031	0.928003	0.984284
	8	0.604439	0.70508	0.725572	0.882736	0.648823	0.470779	0.357767	0.604948	0.0725633	3.11255	0.327495	2.78707	2.88424	0.521251	0.907336	0.902004	0.948041
	9	0.632434	0.769569	0.988062	1.00612	0.825154	0.644768	0.525734	0.616343	0.57562	0.0983964	2.98723	2.08938	2.33682	2.50131	0.135233	0.850184	1.46832
	10	2.0328	1.74417	1.39407	1.20415	0.926826	0.83102	0.71402	0.774045	0.688997	0.510807	0.248666	2.3481	2.27701	2.32568	2.31725	2.20125	1.99561
	11	1.90942	1.72725	1.44872	1.16849	0.872789	0.837571	1.00475	1.09773	1.08624	0.982911	1.08624	1.16929	1.92037	2.18671	2.15748	2.15887	2.01417
	12	2.28378	1.79483	1.35944	1.19566	1.17961	0.943186	1.13886	1.36207	1.33022	1.25662	1.35786	1.5229	1.50248	1.83386	1.90231	1.94222	1.86511
	13	0.291423	0.887085	0.964526	1.13927	1.19799	1.2949	1.44999	1.54026	1.58542	1.60326	1.63466	1.57774	1.51529	1.75488	1.87238	1.86626	1.80012
	14		1.12492	1.28946	1.23638	1.15589	1.29296	1.69983	1.69968	1.56197	1.58749	1.6662	1.55726	1.51016	1.71543	1.95593	1.93004
	15			1.51123	1.28724	1.05555	0.741353	1.85442	1.8416	1.68411	1.73339	2.08166	2.3255	1.31374	1.50039	2.14314
	16				1.93997	1.38145	1.97798	2.10493	1.98711	1.80471	1.7613	2.2026	2.25608	1.52469	1.41407
	17					1.71756	1.73094	1.83369	1.95045	1.96404	2.00533	2.12238	1.71557	1.29512
8	1					0.770774	0.917075	0.905515	2.56027	1.98484	1.96768	1.9703	1.96468						8																		8
	2					1.75474	2.12894	3.06011	2.87157	2.40197	2.16426	1.94627	1.85258	1.87059
	3			1.81561	2.31513	2.48484	2.45095	2.55353	2.76641	2.40946	2.27817	2.4297	1.54023	1.55152	1.59451
	4		1.56714	1.84474	2.37813	2.3943	2.44623	2.50208	2.53546	2.53608	2.47619	2.55386	2.99012	1.52183	1.44964	1.31761
	5	1.43906	1.52275	1.63787	2.09463	2.28577	2.39707	2.58436	2.62119	2.69682	2.69219	2.44177	2.51693	0.875978	0.940277	0.906592	1.06698
	6	1.29972	1.39468	1.34197	1.64238	1.863	2.41072	2.55902	2.51105	2.78197	2.83555	1.02328	2.53318	0.514575	0.955782	0.948885	1.06156	1.07734
	7	1.13289	1.05351	1.15511	1.13454	1.14747	0.812784	0.430554	0.239883	2.72049	0.0446527	0.488118	2.10298	0.857202	0.798297	0.968842	0.960206	1.03627
	8	0.647106	0.801598	0.830513	0.897992	0.7596	0.677112	0.818172	0.821796	0.52651	1.02717	1.4411	1.7663	1.91406	0.921721	0.971884	0.872874	0.827805
	9	2.16853	0.881533	0.844291	1.06004	0.974067	0.791974	0.802374	0.797422	0.550626	2.88061	2.3596	1.74626	1.9003	2.53707	2.55496	1.11539	1.18855
	10	1.87171	1.52998	1.23476	1.24907	1.07506	0.984171	0.984493	0.842188	0.73331	0.58419	1.29822	1.92712	2.132	2.0909	2.06707	1.80195	1.74311
	11	1.8772	1.6182	1.29867	1.19513	1.08434	1.06613	1.12091	1.25734	1.29971	1.0791	1.12762	1.60079	1.75068	2.03449	2.08742	1.97337	1.84186
	12	2.44958	1.76359	1.50277	1.38098	1.33242	1.1161	1.18613	1.28297	1.36466	1.29694	1.37946	1.50644	1.47722	1.81399	1.83899	1.85154	1.86164
	13	2.66379	1.60945	1.14271	1.35492	1.43726	1.16362	1.16024	1.40567	1.462	1.65873	1.6513	1.55785	1.55838	1.75642	1.87625	1.84152	1.78513
	14		2.47115	1.29971	1.19601	1.37947	1.38513	1.29322	1.4643	1.50212	1.55072	1.51287	1.56907	1.50863	1.59662	1.94061	1.97181
	15			1.23131	1.38089	1.55697	2.20909	2.23306	1.88304	1.81945	1.85382	2.21262	1.6291	1.29624	1.40117	2.06321
	16				1.87619	1.76494	2.07227	2.17085	2.09268	1.96335	1.93094	2.21731	2.81328	1.21621	1.23965
	17					1.79043	2.01783	2.0976	2.10654	2.09914	2.02316	2.00427	1.6336	1.26926
9	1					0.961939	0.953872	0.81167	2.69842	1.93871	1.90149	1.92287	1.92519						9																		9
	2					2.06515	1.89713	2.70009	2.81921	2.79517	1.95928	1.89179	1.73024	1.78402
	3			2.23298	2.31776	2.47096	2.39323	2.49543	2.75828	2.73685	2.16243	2.08978	1.33483	1.36696	1.35675
	4		1.88769	2.34515	2.41332	2.47622	2.47916	2.50829	2.39647	2.59806	2.31796	1.86726	1.41401	1.27082	1.19569	1.20179
	5	1.56004	1.71983	1.92804	2.23318	2.46619	2.63784	2.80832	2.44155	2.64468	2.62281	2.59007	1.62255	1.11797	1.02497	0.934574	1.0317
	6	1.65636	1.68705	1.73732	2.25422	2.55729	2.60878	2.71685	2.60976	2.68027	2.76643	2.5421	2.51845	1.00967	1.00948	0.878547	0.930598	1.02798
	7	1.33133	0.21517	0.55038	0.240815	0.359883	3.09418	0.0678117	3.0967	2.57213	2.65415	2.97065	2.55161	3.05486	0.736839	0.820396	0.902663	0.868329
	8	0.354566	0.150028	0.14635	0.232186	0.342643	0.338727	0.28034	0.221233	2.70169	2.54048	2.5499	2.32477	2.84559	0.603595	0.595072	0.784322	0.839876
	9	0.249914	1.28704	3.1374	0.753771	0.496282	0.495304	0.450741	0.452216	3.05793	2.71957	2.88253	2.38194	2.43057	2.89256	3.10028	3.08152	0.238651
	10	1.99888	1.43575	1.25571	1.25867	0.902109	0.724565	0.799879	0.853899	0.991375	0.64561	0.574481	2.02565	2.14277	2.40124	2.52189	2.23872	1.99354
	11	1.74836	1.75546	1.48419	1.35465	1.18513	0.986553	1.11879	1.26454	1.11739	1.02781	1.10199	1.3922	1.75353	2.16041	2.15032	2.09061	1.95215
	12	2.33445	1.88967	1.65976	1.38315	1.23752	1.19819	1.24587	1.29609	1.28819	1.21616	1.34003	1.45388	1.49661	1.75819	1.83993	1.94292	1.84808
	13	2.59922	2.05356	1.41244	1.21855	1.14755	1.17227	1.17268	1.33419	1.48946	1.45298	1.46473	1.51146	1.60482	1.73226	1.85614	1.84183	1.7283
	14		2.32171	1.39012	1.19933	1.15341	0.844058	1.15354	1.41385	1.47875	1.63518	1.75007	1.67006	1.69785	1.82588	1.92074	1.89393
	15			1.30585	1.38646	1.26666	1.17757	1.54933	1.70382	1.66244	1.72713	2.06816	1.93839	1.59578	1.67293	2.10381
	16				1.84085	1.66408	1.82208	2.05323	1.99071	1.93933	1.96811	2.04014	1.9847	1.64878	1.59922
	17					1.60478	1.62538	1.87828	1.95843	1.92287	1.93469	2.03272	1.66498	1.37853
10	1					0.9633	1.14326	0.927399	1.54943	1.85623	1.78317	1.85935	1.84402						10																		10
	2					1.36781	1.75613	2.49028	2.81438	2.70454	2.09561	1.7448	1.62359	1.68618
	3			1.94142	2.21623	2.43736	2.20048	2.65842	2.75212	2.88436	2.44518	0.413138	1.08297	1.2402	1.40797
	4		1.91711	2.2338	2.33135	2.37949	2.57416	2.55016	2.55573	2.75043	2.65818	0.240706	0.605491	0.892839	1.0698	1.07932
	5	1.61181	1.72069	1.91444	2.16557	2.37258	2.56162	2.57769	2.49127	2.66393	2.98827	0.132399	0.439156	0.588997	0.775069	0.840828	0.98073
	6	1.39408	1.4447	1.20162	2.20215	2.50191	2.71447	2.50914	2.52573	2.54232	2.97565	0.0446178	0.234978	0.496508	0.759739	0.86918	0.997459	1.1722
	7	0.839586	0.785148	0.726231	0.891988	1.14593	0.283724	0.0914869	2.85774	2.70372	3.08993	0.0687657	0.00457941	0.195381	0.806638	0.920871	0.981345	1.0196
	8	0.558131	0.55053	0.56458	0.674375	0.744857	0.563427	0.473515	0.508715	0.000911562	2.76523	0.351411	2.2679	2.66123	0.863251	0.920427	0.835163	0.992611
	9	0.351341	0.448583	0.60272	0.752574	0.820135	0.647103	0.631716	0.628496	0.537773	2.69859	2.45138	1.96826	2.33579	2.30539	2.22225	1.50175	1.42622
	10	1.15838	1.13705	0.764711	0.783933	0.826462	0.807101	0.724468	0.746866	0.780325	0.596678	1.2634	1.97313	1.86938	2.22266	2.20385	1.96441	1.83362
	11	2.01932	1.57883	1.15855	0.52651	0.638096	0.675719	0.897172	1.03766	1.03985	1.13758	1.07015	1.39923	1.64339	1.97922	2.03542	1.97984	1.92702
	12	2.69349	1.83519	1.08644	0.989869	1.0067	0.724888	0.924146	1.19574	1.26457	1.35098	1.49152	1.45123	1.49904	1.71659	1.8394	1.90566	1.82767
	13	3.07028	1.01126	1.0305	1.11608	1.17426	1.07105	1.22088	1.28691	1.47209	1.62994	1.56928	1.50319	1.52257	1.65621	1.78533	1.83141	1.76801
	14		1.106	1.21257	1.145	1.1099	1.20256	1.34361	1.37136	1.43727	1.60949	1.61423	1.49971	1.5228	1.63764	1.87073	1.91709
	15			1.3114	1.31119	1.3176	1.77443	1.4594	1.67186	1.56933	1.76719	1.84949	1.69707	1.46576	1.50577	2.15089
	16				1.79536	1.53345	2.11816	1.9275	1.73994	1.72552	1.79873	2.0259	1.90649	1.50971	1.39353
	17					1.65147	1.71335	1.80716	1.76851	1.87385	2.02149	2.0602	1.92768	1.08324
