# Supplementary material for: Stationary Atrial Fibrillation Properties in the Goat Do Not Entail Stable or Recurrent Conduction Patterns
Source: Front Physiol. 2018 Jul 27;9:947. doi: 10.3389/fphys.2018.00947 (PMC6072874; doi:10.3389/fphys.2018.00947)
Supplement: Supplementary file 1 [file Data_Sheet_1.ZIP › Goat_7_Property maps.xlsx]

## Sheet: AFCL
AFCL
Signals of insufficient quality were excluded from the property maps. Signals could be rejected based on noise low amplitude, large artefact or ventricluar farfields that could not be substracted.
		1	2	3	4	5	6	7	8	9	10	11	12	13	14	15	16	17
1	1					0.130895	0.131858	0.133782	0.134745	0.134745	0.135707	0.135707	0.135707	0.137151					1																		1
	2				0.128008	0.128008	0.12897	0.129933	0.131858	0.133782	0.135707	0.13667	0.135707	0.13667
	3			0.12512	0.12512	0.126083	0.12512	0.126083	0.127045	0.12897	0.131858	0.134745	0.134745	0.135707
	4		0.128008	0.127045	0.12512	0.124158	0.12512	0.12512	0.12512	0.12512	0.12897	0.131858	0.131858	0.13282
	5	0.128489	0.126083	0.124158	0.124158	0.123195	0.124158	0.12512	0.12512	0.12512	0.12512	0.12897	0.131858	0.131858
	6	0.126083	0.124158	0.123195	0.123195	0.123195	0.123195	0.124158	0.12512	0.126083	0.124158	0.12512	0.128008	0.129933	0.12897	0.127045
	7	0.12512	0.124158	0.123195	0.123195	0.123195	0.123195	0.123195	0.12512	0.127045	0.124158	0.123195	0.12512	0.12512	0.127045	0.126083
	8	0.128008	0.124158	0.124158	0.124158	0.124158	0.123195	0.122233	0.12512	0.12127	0.12127	0.12127	0.122233	0.123195	0.124158	0.124158
	9	0.133782	0.127045	0.126083		0.12512	0.12512	0.122233	0.120789	0.120308	0.126083	0.120308	0.120789	0.122233	0.123195	0.122233
	10	0.138595	0.135707	0.129933	0.127045	0.12512	0.122233	0.120308	0.119346	0.119346	0.12127	0.120308	0.120308	0.122233	0.122233	0.123195
	11	0.138595	0.136189	0.133782	0.131858	0.123195	0.12127	0.120308	0.119346	0.119346	0.119346	0.119346	0.119346	0.12127	0.122233	0.123195
	12	0.135707	0.133782	0.134745	0.130895	0.123195	0.12127	0.120308	0.119346	0.119346	0.119346	0.120308	0.120308	0.12127	0.123195	0.124158
	13	0.12897	0.133782	0.131858	0.12512	0.12127	0.12127	0.120308	0.119346	0.119346	0.119346	0.120308	0.120308	0.12127
	14		0.127045	0.12512	0.122233	0.12127	0.120308	0.120308	0.119346	0.119346	0.119346	0.120308	0.12127	0.122233
	15			0.123195	0.12127	0.12127	0.120308	0.12127	0.119346	0.120308	0.120308	0.12127	0.122233	0.123195
	16				0.120308	0.120308	0.120308	0.120308	0.120308	0.12127	0.122233	0.122233	0.124158	0.123195
	17					0.120308	0.120308	0.120308	0.120308	0.12127	0.122233	0.123195	0.12512	0.123195
2	1					0.130895	0.129933	0.13282	0.134745	0.133782	0.133782	0.134745	0.135707	0.135707					2																		2
	2				0.127045	0.128489	0.12897	0.12897	0.131858	0.130895	0.133782	0.133782	0.135707	0.135707
	3			0.126083	0.126083	0.127045	0.12512	0.12512	0.127045	0.128008	0.130895	0.133782	0.133782	0.134745
	4		0.128008	0.128008	0.12512	0.12512	0.126083	0.12512	0.127045	0.126083	0.12897	0.131858	0.13282	0.13282
	5	0.129933	0.124158	0.123195	0.123195	0.123195	0.123195	0.12512	0.12512	0.126083	0.127045	0.129933	0.131858	0.131858
	6	0.126083	0.124158	0.123195	0.122233	0.123195	0.123195	0.124158	0.124158	0.127045	0.12512	0.127045	0.129933	0.129933	0.12897	0.12897
	7	0.12512	0.124158	0.124158	0.123195	0.123195	0.123195	0.122233	0.124158	0.127045	0.12512	0.124158	0.127045	0.127045	0.127045	0.12897
	8	0.12512	0.123195	0.124158	0.124158	0.124158	0.123195	0.123195	0.123195	0.122233	0.121752	0.122233	0.123195	0.124158	0.125602	0.126083
	9	0.130895	0.126083	0.124158		0.124158	0.124158	0.123195	0.12127	0.12127	0.124639	0.12127	0.12127	0.122233	0.123195	0.123195
	10	0.138114	0.134745	0.129933	0.12512	0.12512	0.122233	0.12127	0.120308	0.120308	0.123195	0.120308	0.12127	0.12127	0.123195	0.123195
	11	0.137632	0.133782	0.133782	0.130895	0.123195	0.122233	0.120308	0.120308	0.119346	0.120308	0.120308	0.12127	0.122233	0.123195	0.123195
	12	0.134745	0.133782	0.133782	0.130895	0.123195	0.122233	0.120308	0.120308	0.120308	0.120308	0.120789	0.120308	0.122233	0.123195	0.123195
	13	0.128008	0.13282	0.130895	0.127045	0.122233	0.12127	0.120308	0.120308	0.120308	0.120308	0.120308	0.120308	0.12127
	14		0.126564	0.126083	0.123195	0.122233	0.122233	0.120308	0.120308	0.120308	0.120308	0.12127	0.122233	0.122233
	15			0.123195	0.122233	0.122233	0.12127	0.12127	0.120308	0.120308	0.120308	0.12127	0.122233	0.123677
	16				0.122233	0.120308	0.12127	0.120789	0.12127	0.12127	0.12127	0.122233	0.123195	0.12512
	17					0.12127	0.12127	0.12127	0.12127	0.122233	0.122233	0.124158	0.124158	0.124158
3	1					0.130895	0.130895	0.13282	0.13282	0.134745	0.137632	0.138595	0.138595	0.138595					3																		3
	2				0.128008	0.128008	0.129933	0.12897	0.129933	0.131858	0.13667	0.138595	0.138595	0.138595
	3			0.126083	0.127045	0.126083	0.12512	0.126083	0.126083	0.128008	0.130895	0.13667	0.13667	0.136189
	4		0.128008	0.126083	0.123195	0.124158	0.124158	0.124158	0.12512	0.124158	0.128008	0.13282	0.13282	0.13282
	5	0.126083	0.124158	0.122233	0.123195	0.122233	0.122233	0.124158	0.124158	0.124158	0.12512	0.12897	0.131858	0.130895
	6	0.12512	0.123195	0.122233	0.122233	0.122233	0.122233	0.123195	0.123195	0.12512	0.123195	0.12512	0.12897	0.129933	0.129933	0.127526
	7	0.123195	0.123195	0.123195	0.123195	0.122233	0.122233	0.12127	0.123195	0.126083	0.123195	0.122233	0.123195	0.12512	0.12512	0.12512
	8	0.12512	0.123195	0.122233	0.123195	0.123195	0.122233	0.122233	0.124158	0.12127	0.120308	0.120308	0.12127	0.12127	0.123195	0.122233
	9	0.128008	0.125602	0.124158		0.124158	0.123195	0.122233	0.12127	0.120308	0.12512	0.120308	0.120308	0.12127	0.122233	0.121752
	10	0.139076	0.133782	0.127045	0.12512	0.123195	0.122233	0.120308	0.119346	0.119346	0.12127	0.120308	0.120308	0.12127	0.12127	0.12127
	11	0.138595	0.135707	0.134745	0.130895	0.123195	0.12127	0.119346	0.119346	0.119346	0.120308	0.120308	0.120308	0.12127	0.12127	0.12127
	12	0.134745	0.134745	0.133782	0.130895	0.123195	0.12127	0.120308	0.119346	0.120308	0.119346	0.119346	0.120308	0.12127	0.12127	0.122233
	13	0.127045	0.135707	0.131858	0.126083	0.122233	0.12127	0.120308	0.119346	0.119346	0.119346	0.119346	0.120308	0.12127
	14		0.128008	0.12512	0.122233	0.122233	0.12127	0.120308	0.120308	0.119346	0.119346	0.119346	0.120308	0.12127
	15			0.122233	0.12127	0.12127	0.120308	0.120308	0.120308	0.119346	0.120308	0.12127	0.122233	0.12127
	16				0.120308	0.119346	0.120308	0.120308	0.120308	0.120308	0.120308	0.12127	0.123195	0.123195
	17					0.120308	0.120308	0.120308	0.120308	0.120308	0.12127	0.122233	0.123195	0.122233
4	1					0.131858	0.131858	0.133782	0.134745	0.135707	0.135707	0.13667	0.135707	0.137632					4																		4
	2				0.12897	0.129933	0.130895	0.130895	0.130895	0.131858	0.134745	0.135707	0.135707	0.137632
	3			0.127045	0.127045	0.12897	0.126083	0.127045	0.12897	0.12897	0.131858	0.135707	0.135707	0.135707
	4		0.129933	0.128489	0.128008	0.127045	0.126083	0.126083	0.128008	0.127045	0.129933	0.133782	0.134745	0.133782
	5	0.129933	0.127045	0.124158	0.124158	0.124158	0.124158	0.126083	0.126083	0.127526	0.127045	0.130895	0.13282	0.13282
	6	0.126083	0.124158	0.124158	0.124158	0.124158	0.123195	0.124158	0.126083	0.128008	0.12512	0.126083	0.130895	0.130895	0.131858	0.133782
	7	0.124158	0.123195	0.124158	0.12512	0.124158	0.124158	0.124158	0.126083	0.127045	0.126083	0.12512	0.126083	0.128008	0.12897	0.12897
	8	0.127045	0.12512	0.12512	0.12512	0.12512	0.124158	0.124158	0.12512	0.122233	0.122233	0.122233	0.124158	0.12512	0.127045	0.126083
	9	0.130895	0.128008	0.126083		0.126083	0.126083	0.123195	0.122233	0.12127	0.128008	0.120789	0.122233	0.123195	0.124158	0.124158
	10	0.138595	0.13282	0.129933	0.127045	0.126083	0.124158	0.121752	0.12127	0.120308	0.12512	0.12127	0.12127	0.122233	0.124158	0.124158
	11	0.137632	0.135707	0.13282	0.12897	0.126083	0.122233	0.12127	0.120308	0.120308	0.120308	0.120308	0.12127	0.123195	0.123195	0.123195
	12	0.135226	0.133782	0.133782	0.130895	0.12512	0.122233	0.12127	0.120308	0.120308	0.120789	0.120789	0.12127	0.123195	0.124158	0.124158
	13	0.126083	0.13282	0.130895	0.12897	0.124158	0.12127	0.12127	0.120308	0.120308	0.120308	0.120308	0.12127	0.122233
	14		0.127045	0.126083	0.124158	0.123195	0.123195	0.12127	0.12127	0.120308	0.120308	0.12127	0.123195	0.123195
	15			0.124158	0.123195	0.122233	0.122233	0.12127	0.12127	0.12127	0.12127	0.12127	0.124158	0.127045
	16				0.122233	0.12127	0.12127	0.12127	0.12127	0.12127	0.122233	0.122233	0.124158	0.126083
	17					0.122233	0.12127	0.12127	0.12127	0.122233	0.122233	0.123195	0.12512	0.125602
5	1					0.131858	0.133782	0.13282	0.135707	0.13667	0.135707	0.13667	0.13667	0.137632					5																		5
	2				0.127045	0.12897	0.130895	0.129451	0.129933	0.133782	0.135707	0.13667	0.13667	0.13667
	3			0.12512	0.125602	0.127045	0.124158	0.12512	0.126083	0.128008	0.131858	0.135226	0.135707	0.13667
	4		0.128008	0.12512	0.124158	0.124158	0.12512	0.124158	0.12512	0.12512	0.128008	0.13282	0.133782	0.134745
	5	0.12897	0.124158	0.124158	0.123195	0.122233	0.122233	0.12512	0.12512	0.124158	0.126083	0.130895	0.131858	0.13282
	6	0.12512	0.123195	0.123195	0.122233	0.122233	0.122233	0.124158	0.12512	0.12512	0.124158	0.12512	0.129933	0.130895	0.13282	0.131858
	7	0.123195	0.123195	0.123195	0.122233	0.122233	0.122233	0.122233	0.123195	0.126083	0.123195	0.122233	0.124158	0.127045	0.127045	0.128008
	8	0.126083	0.124158	0.123195	0.123195	0.123195	0.122233	0.122233	0.124158	0.121752	0.12127	0.12127	0.122233	0.124158	0.12512	0.12512
	9	0.131858	0.124158	0.124158		0.123195	0.124158	0.122233	0.12127	0.120308	0.127045	0.12127	0.121752	0.123195	0.123195	0.123195
	10	0.138595	0.131858	0.127045	0.126083	0.12512	0.121752	0.120308	0.120308	0.120308	0.122233	0.12127	0.12127	0.122233	0.122233	0.123195
	11	0.138595	0.13667	0.133782	0.129933	0.124158	0.12127	0.12127	0.120308	0.120308	0.120308	0.120308	0.12127	0.122233	0.123195	0.123195
	12	0.133782	0.13282	0.13282	0.129933	0.123195	0.12127	0.120308	0.120308	0.120308	0.120308	0.120308	0.12127	0.122233	0.123195	0.124158
	13	0.126083	0.131858	0.129933	0.12512	0.123195	0.12127	0.12127	0.12127	0.120308	0.120308	0.12127	0.12127	0.122233
	14		0.127526	0.126083	0.123195	0.122233	0.12127	0.12127	0.120308	0.120308	0.120308	0.12127	0.122233	0.122233
	15			0.124158	0.123195	0.122233	0.12127	0.12127	0.12127	0.12127	0.12127	0.122233	0.123195	0.12512
	16				0.122233	0.12127	0.12127	0.12127	0.12127	0.12127	0.122233	0.122233	0.124158	0.124639
	17					0.12127	0.12127	0.12127	0.12127	0.122233	0.122233	0.124158	0.126083	0.126083
6	1					0.131376	0.13282	0.134745	0.135707	0.135707	0.13667	0.13667	0.137632	0.137632					6																		6
	2				0.12897	0.129933	0.130895	0.131858	0.130895	0.13282	0.135707	0.13667	0.13667	0.137632
	3			0.127045	0.127045	0.127045	0.12512	0.126083	0.12897	0.128008	0.131858	0.136189	0.13667	0.13667
	4		0.130895	0.128008	0.126083	0.125602	0.126083	0.12512	0.128008	0.126083	0.128008	0.13282	0.13282	0.133782
	5	0.129933	0.12512	0.124158	0.123195	0.123195	0.123195	0.126083	0.126083	0.12512	0.126083	0.12897	0.131858	0.13282
	6	0.127045	0.124158	0.123195	0.123195	0.123195	0.123195	0.124158	0.12512	0.127045	0.124158	0.12512	0.129933	0.131858	0.131858	0.130895
	7	0.12512	0.124158	0.124158	0.124158	0.123195	0.123195	0.123195	0.124158	0.126083	0.124158	0.123195	0.12512	0.128008	0.12897	0.12897
	8	0.127045	0.124158	0.12512	0.12512	0.124158	0.123195	0.123195	0.123195	0.122233	0.12127	0.12127	0.122233	0.124158	0.125602	0.124158
	9	0.133782	0.127045	0.12512		0.12512	0.12512	0.123195	0.12127	0.12127	0.126083	0.120308	0.12127	0.12127	0.123195	0.123195
	10	0.138595	0.13282	0.128008	0.127045	0.124158	0.123195	0.12127	0.120308	0.120308	0.121752	0.120308	0.120308	0.122233	0.122233	0.122233
	11	0.138595	0.135707	0.133782	0.130895	0.124158	0.122233	0.12127	0.120308	0.120308	0.120308	0.120308	0.12127	0.12127	0.122233	0.122233
	12	0.134745	0.133782	0.134745	0.129933	0.123195	0.12127	0.120308	0.120308	0.120308	0.120308	0.12127	0.12127	0.12127	0.122233	0.123195
	13	0.128008	0.133782	0.130895	0.126083	0.123195	0.12127	0.120308	0.120308	0.120308	0.120308	0.120308	0.12127	0.12127
	14		0.128008	0.127045	0.123195	0.122233	0.121752	0.120308	0.120308	0.120308	0.120308	0.120308	0.122233	0.12127
	15			0.124158	0.122233	0.122233	0.122233	0.12127	0.12127	0.120308	0.12127	0.122233	0.122233	0.124158
	16				0.122233	0.12127	0.12127	0.120308	0.12127	0.12127	0.122233	0.12127	0.124158	0.126083
	17					0.12127	0.12127	0.12127	0.120308	0.122233	0.122233	0.123195	0.126083	0.126083
7	1					0.130414	0.130895	0.13282	0.134745	0.135226	0.13667	0.13667	0.137632	0.138595					7																		7
	2				0.12897	0.129933	0.129933	0.130895	0.131858	0.133782	0.13667	0.137632	0.137632	0.137632
	3			0.126083	0.127045	0.128008	0.127045	0.127045	0.127045	0.129933	0.131858	0.13667	0.137632	0.138595
	4		0.129933	0.127045	0.126083	0.126083	0.127045	0.127045	0.126083	0.126083	0.129933	0.133782	0.134745	0.135707
	5	0.129933	0.126083	0.12512	0.12512	0.12512	0.12512	0.127045	0.127045	0.12512	0.126083	0.129933	0.13282	0.13282
	6	0.126083	0.12512	0.124158	0.124158	0.124158	0.124158	0.12512	0.126083	0.127045	0.124158	0.126083	0.12897	0.131858	0.131858	0.130895
	7	0.12512	0.12512	0.12512	0.125602	0.124158	0.124158	0.124158	0.126083	0.128008	0.124158	0.124158	0.12512	0.127526	0.12897	0.128008
	8	0.127045	0.12512	0.124158	0.126083	0.126083	0.12512	0.124158	0.12512	0.122233	0.123195	0.122233	0.123195	0.124158	0.126083	0.126083
	9	0.133782	0.127045	0.12512		0.126083	0.126083	0.123195	0.122233	0.122233	0.12512	0.122233	0.122233	0.122233	0.123195	0.122233
	10	0.14052	0.135707	0.128008	0.126083	0.12512	0.124158	0.122233	0.12127	0.12127	0.123195	0.12127	0.12127	0.122233	0.122233	0.122233
	11	0.139076	0.13667	0.133782	0.129933	0.124158	0.122233	0.12127	0.12127	0.12127	0.12127	0.12127	0.12127	0.122233	0.122233	0.122233
	12	0.13667	0.135707	0.135226	0.131858	0.123195	0.122233	0.122233	0.12127	0.12127	0.12127	0.12127	0.12127	0.122233	0.122233	0.123195
	13	0.127045	0.133782	0.130895	0.124158	0.123195	0.122233	0.12127	0.12127	0.12127	0.12127	0.12127	0.122233	0.122233
	14		0.128008	0.126083	0.123195	0.123195	0.122233	0.12127	0.12127	0.12127	0.122233	0.122233	0.123195	0.124158
	15			0.123195	0.122714	0.123195	0.122233	0.122233	0.12127	0.122233	0.122233	0.123195	0.123195	0.12512
	16				0.122233	0.122233	0.121752	0.12127	0.12127	0.122233	0.123195	0.123195	0.12512	0.126083
	17					0.12127	0.122233	0.121752	0.12127	0.122233	0.122233	0.123195	0.127045	0.126083
8	1					0.130895	0.129933	0.134745	0.135707	0.135707	0.13667	0.13667	0.13667	0.13667					8																		8
	2				0.130895	0.129933	0.129933	0.131858	0.13282	0.133782	0.13667	0.135707	0.136189	0.13667
	3			0.127045	0.128008	0.128008	0.127045	0.127045	0.129451	0.130895	0.131858	0.135707	0.135707	0.13667
	4		0.131858	0.12897	0.127045	0.12512	0.126083	0.126083	0.127045	0.127045	0.128008	0.13282	0.133782	0.133782
	5	0.130895	0.126083	0.124158	0.124158	0.124158	0.124158	0.126083	0.127045	0.12512	0.127045	0.12897	0.131858	0.131858
	6	0.127045	0.124158	0.123195	0.123195	0.124158	0.124158	0.12512	0.12512	0.128008	0.124158	0.126083	0.12897	0.130895	0.130895	0.129933
	7	0.126083	0.124158	0.124158	0.124158	0.123195	0.124158	0.123195	0.12512	0.127045	0.123195	0.124158	0.12512	0.126083	0.12897	0.128008
	8	0.127045	0.12512	0.124158	0.124158	0.124158	0.124158	0.124158	0.124158	0.122233	0.12127	0.120308	0.123195	0.124158	0.12512	0.12512
	9	0.133782	0.127045	0.12512		0.124158	0.124158	0.123195	0.122233	0.120308	0.126083	0.120308	0.12127	0.122233	0.123677	0.124158
	10	0.14052	0.134264	0.128008	0.126083	0.12512	0.122233	0.12127	0.120308	0.120308	0.123195	0.120308	0.12127	0.122233	0.123195	0.123195
	11	0.139557	0.13667	0.134745	0.130895	0.12512	0.12127	0.120308	0.120308	0.120308	0.120308	0.120308	0.120308	0.122233	0.123195	0.123195
	12	0.137632	0.135707	0.134745	0.13282	0.124158	0.12127	0.120308	0.120308	0.120308	0.120308	0.120308	0.120308	0.122233	0.123195	0.124158
	13	0.128008	0.133782	0.133782	0.127045	0.124158	0.12127	0.120308	0.120308	0.120308	0.120308	0.12127	0.12127	0.122233
	14		0.128008	0.127045	0.124158	0.123195	0.122233	0.12127	0.120308	0.120308	0.120308	0.12127	0.12127	0.122233
	15			0.124158	0.122233	0.122233	0.122233	0.12127	0.120308	0.120308	0.120308	0.122233	0.123195	0.124158
	16				0.121752	0.12127	0.12127	0.120308	0.12127	0.12127	0.12127	0.122233	0.123195	0.124158
	17					0.12127	0.12127	0.120789	0.120308	0.122233	0.122233	0.123195	0.124158	0.124158
9	1					0.134745	0.134745	0.135707	0.13667	0.13667	0.13667	0.138595	0.137632	0.13667					9																		9
	2				0.129933	0.130895	0.13282	0.131376	0.133782	0.134745	0.13667	0.13667	0.137632	0.13667
	3			0.128008	0.128008	0.12897	0.127045	0.128008	0.12897	0.129933	0.134745	0.13667	0.13667	0.137632
	4		0.130895	0.12897	0.128008	0.127045	0.127045	0.127045	0.128008	0.128008	0.131858	0.134745	0.135707	0.134745
	5	0.131858	0.127045	0.12512	0.12512	0.12512	0.126083	0.126083	0.127045	0.127045	0.128008	0.13282	0.133782	0.133782
	6	0.127045	0.126083	0.124158	0.124158	0.124158	0.12512	0.12512	0.12512	0.128008	0.126564	0.127045	0.130895	0.13282	0.13282	0.130895
	7	0.126083	0.12512	0.126083	0.12512	0.12512	0.124158	0.124158	0.126083	0.12897	0.127045	0.12512	0.127045	0.128008	0.129933	0.129933
	8	0.12897	0.126083	0.126083	0.126083	0.12512	0.124158	0.124639	0.12512	0.123195	0.123195	0.122233	0.124158	0.126083	0.127045	0.126083
	9	0.135707	0.128008	0.127045		0.127045	0.126083	0.123195	0.122233	0.12127	0.127045	0.12127	0.122233	0.124158	0.12512	0.12512
	10	0.141482	0.135707	0.12897	0.128008	0.126083	0.124158	0.122233	0.12127	0.120308	0.123195	0.12127	0.12127	0.123195	0.124158	0.12512
	11	0.139557	0.137632	0.135707	0.13282	0.124158	0.123195	0.12127	0.12127	0.12127	0.120308	0.12127	0.12127	0.123195	0.12512	0.12512
	12	0.13667	0.134745	0.135707	0.131858	0.124158	0.123195	0.122233	0.12127	0.12127	0.12127	0.12127	0.12127	0.122233	0.12512	0.12512
	13	0.127045	0.133782	0.131858	0.127045	0.123195	0.123195	0.122233	0.122233	0.12127	0.12127	0.12127	0.122233	0.122233
	14		0.128008	0.128008	0.124158	0.123195	0.123195	0.121752	0.12127	0.122233	0.12127	0.12127	0.122233	0.122233
	15			0.12512	0.123195	0.122233	0.123195	0.122233	0.122233	0.121752	0.12127	0.122233	0.123195	0.124158
	16				0.122233	0.122233	0.12127	0.12127	0.12127	0.122233	0.122233	0.123195	0.12512	0.124158
	17					0.122233	0.12127	0.12127	0.12127	0.122233	0.123195	0.124158	0.126083	0.12512
10	1					0.13282	0.13282	0.134745	0.134745	0.135707	0.13667	0.13667	0.13667	0.137632					10																		10
	2				0.13282	0.130895	0.131858	0.133782	0.13282	0.134745	0.135707	0.13667	0.13667	0.13667
	3			0.127045	0.12897	0.129933	0.128008	0.128008	0.129933	0.130895	0.13282	0.135707	0.13667	0.13667
	4		0.131858	0.12897	0.128008	0.128008	0.128008	0.127045	0.12897	0.128008	0.130895	0.134264	0.134745	0.134745
	5	0.130895	0.128008	0.126083	0.127045	0.127045	0.127045	0.128008	0.128008	0.127045	0.128008	0.130895	0.133782	0.13282
	6	0.127045	0.126083	0.12512	0.126083	0.126083	0.126083	0.127045	0.127045	0.129933	0.127045	0.128008	0.129933	0.130895	0.130895	0.130895
	7	0.124158	0.12512	0.126083	0.126083	0.126083	0.126083	0.126083	0.127045	0.12897	0.126083	0.126083	0.127045	0.128008	0.12897	0.12897
	8	0.126083	0.12512	0.126083	0.126083	0.126083	0.126083	0.126083	0.126083	0.123195	0.123195	0.123195	0.124158	0.12512	0.126083	0.12512
	9	0.13282	0.12897	0.127045		0.126083	0.12512	0.124158	0.122233	0.12127	0.127045	0.12127	0.122233	0.123195	0.124158	0.124158
	10	0.14052	0.135707	0.130895	0.127045	0.126083	0.123195	0.122233	0.12127	0.120308	0.124158	0.12127	0.122233	0.123195	0.124158	0.124158
	11	0.138595	0.13667	0.134745	0.13282	0.12512	0.123195	0.12127	0.12127	0.12127	0.12127	0.12127	0.122233	0.123195	0.124158	0.124158
	12	0.13667	0.135226	0.134745	0.133301	0.124158	0.122233	0.12127	0.12127	0.12127	0.12127	0.12127	0.122233	0.123195	0.124158	0.124158
	13	0.127045	0.134745	0.133782	0.12897	0.124158	0.123195	0.12127	0.12127	0.12127	0.12127	0.12127	0.12127	0.122233
	14		0.128008	0.127045	0.124158	0.123195	0.123195	0.122233	0.12127	0.12127	0.12127	0.12127	0.122233	0.122233
	15			0.124158	0.122233	0.122233	0.122233	0.12127	0.12127	0.12127	0.12127	0.122233	0.123195	0.12512
	16				0.122233	0.122233	0.12127	0.12127	0.12127	0.122233	0.122233	0.123195	0.124158	0.12512
	17					0.122233	0.12127	0.12127	0.12127	0.122233	0.123195	0.12512	0.12512	0.12512

## Sheet: DISS
MaxDissociation
Signals of insufficient quality were excluded from the property maps. Signals could be rejected based on noise low amplitude, large artefact or ventricluar farfields that could not be substracted.
		1	2	3	4	5	6	7	8	9	10	11	12	13	14	15	16	17
1	1					21.633	23.9733	24.1784	22.5335	20.7733	18.9135	14.4165	12.3474	10.038					1																		1
	2				22.2436	26.4185	29.6567	30.3391	29.2826	26.3253	23.0155	18.6228	16.1267	13.9644
	3			25.5021	25.3299	24.9432	23.6438	25.9958	26.9448	27.3145	23.7127	20.3767	18.2247	17.0067
	4		28.8337	27.4576	24.9748	21.0752	18.8574	20.1583	24.3697	25.5537	23.2532	22.268	19.757	19.4989
	5	23.7559	26.3312	24.7946	18.8907	16.1979	15.8216	17.547	21.8616	24.7155	22.7116	22.0302	21.5355	21.0473
	6	22.0488	22.4062	18.132	14.6201	12.4045	15.2402	17.6535	22.6646	23.7595	21.9456	21.8142	23.1095	23.3822	22.8059	22.6504
	7	20.6295	23.7349	20.0701	18.9322	16.6103	15.3224	20.8049	27.0042	27.5094	20.6245	19.8337	20.1996	20.6146	20.0781	20.0147
	8	23.0193	26.6765	21.8497	21.659	20.6211	21.9485	24.0988	27.5209	26.7796	22.6224	19.1298	14.5133	14.9362	14.5884	15.9979
	9	27.9451	30.4466	24.9895		23.1958	23.4179	23.1701	22.0448	23.3286	22.4947	17.2162	10.4584	12.0798	11.127	10.4538
	10	27.7009	32.4343	28.0043	26.661	22.305	18.3701	16.5466	12.5806	20.7565	19.3567	17.5403	8.86117	9.5	8.94467	9.107
	11	24.9402	29.038	27.8289	29.3849	24.177	15.5947	9.91129	6.56539	12.7425	10.9135	10.3139	8.33468	10.2073	9.60288	10.3492
	12	28.149	29.8998	26.2857	29.7137	24.5711	14.5051	7.95766	5.04829	5.3159	5.49497	6.33468	8.74545	10.6429	10.686	9.06237
	13	26.6419	30.7467	31.3983	29.3579	21.5749	14.0891	8.80282	5.06036	5.12676	6.25755	8.42742	13.357	13.7342
	14		28.2352	27.1029	21.8951	16.898	12.5936	9.61569	6.833	5.80885	7.62374	12.6431	18.5427	17.4652
	15			17.3056	13.4431	10.1805	9.81288	9.41449	7.92555	7.44758	10.0948	15.9476	20.7766	19.157
	16				8.45051	6.78471	7.79879	7.71227	8.71169	9.13911	12.0324	18.8676	22.0514	17.876
	17					5.01008	5.2495	6.53924	7.03823	8.37022	10.071	16.0413	20.94	14.6874
2	1					20.1605	23.5388	25.2532	24.375	23.1732	21.6338	15.8348	14.75	11.8971					2																		2
	2				22.4364	25.531	28.1695	30.5574	30.3623	28.0521	24.9119	20.7031	17.4462	15.1138
	3			26.2573	26.1132	25.8494	24.4393	27.113	27.2421	28.2313	25.1826	22.6128	19.8744	17.031
	4		28.7082	28.3376	26.8062	23.4158	20.0084	21.0021	24.0628	26.1771	23.882	22.3841	19.2715	18.3872
	5	22.6004	25.3706	24.0517	19.3223	17.6037	17.8709	18.1206	21.6271	23.9833	22.6224	21.2608	20.5624	20.4379
	6	21.2238	22.4165	17.2895	14.3395	13.5051	16.4743	17.2981	21.8178	22.6883	20.6729	20.1345	22.4055	22.6445	22.9555	23.9175
	7	18.6445	21.9174	19.1814	17.7433	17.0267	16.4488	18.1068	24.2547	25.1775	20.2029	18.9218	19.7223	21.3181	20.9477	20.9049
	8	21.9072	24.9542	19.7593	20.1543	18.8282	19.9938	22.1173	26.1921	25.1735	21.0041	17.5294	15.1379	15.5893	15.8041	17.2386
	9	27.7397	30.4358	24.8792		20.1756	22.0083	21.7851	20.5996	21.9534	21.0125	16.4485	10.5801	11.4041	11.3837	10.873
	10	29.3492	33.8813	27.867	25.7208	21.9524	18.8592	15.7053	11.583	19.0323	17.8583	16.4008	8.4065	9.89002	9.12679	9.50612
	11	24.0411	28.9295	27.8991	28.3742	24.6934	15.768	9.62551	6.91515	12.6545	10.4848	10.0242	7.65455	9.79184	9.14754	10.1025
	12	25.9798	28.5144	24.0746	27.6459	23.9199	15.3347	7.97769	5.15789	5.55758	5.46667	6.0303	8.58586	9.75102	9.73975	8.75359
	13	24.3269	27.3289	28.2361	25.947	21.7869	14.7267	8.64909	5.31515	5.24646	5.92525	8.40606	12.9797	13.5215
	14		23.7865	24.1527	19.0704	17.0994	12.879	9.82424	6.7596	5.60202	7.16566	11.5466	18.2515	18.2213
	15			17.9153	13.5337	11.1538	9.56275	9.47071	8.03838	7.17409	8.84242	13.3971	20.0635	18.462
	16				9.21181	7.25202	7.82258	7.90909	9.37374	8.65182	10.7794	16.5714	22.2424	19
	17					5.46774	5.21212	6.80606	7.34343	8.43522	9.45214	15.0186	20.5624	15.6887
3	1					22.2786	26.0387	26.4924	24.0264	21.2942	17.6696	14.191	13.1986	10.9231					3																		3
	2				24.6981	29.0063	30.5769	30.693	30.3846	26.8286	24.1715	20.7411	17.4989	16.0628
	3			27.5669	28.7233	26.2025	24.7516	27.1896	26.9475	28.1255	26.278	22.9844	20.4633	18.4945
	4		30.166	30.0562	27.2107	22.8388	19.1925	18.9293	23.0922	24.3375	24.1818	24.8497	22.1703	21.0044
	5	25.4109	27.2012	25.002	19.4682	16.616	15.9362	16.9004	20.5602	22.8402	21.5336	21.1045	21.0428	21.2167
	6	24.4574	25.0041	18.5939	14.9385	13.5287	16.2382	16.1715	21.4606	21.5272	19.3963	19.3326	21.3634	22.6716	22.8665	22.3368
	7	21.237	24.1835	21.0948	20.6401	18.4306	16.7612	18.9226	25.412	24.9186	18.7375	18.4867	18.9153	20.7479	21.2296	19.9813
	8	21.9434	25.4456	21.7684	23.8663	22.1317	22.1561	22.7172	26.1302	25.8499	21.6121	18.6768	14.8016	15.77	15.9112	17.0986
	9	29.0919	31.704	25.2463		23.2115	22.8102	22.3679	20.1697	21.9679	21.8497	17.5321	10.4608	11.4069	10.7791	10.1391
	10	30.7449	34.0721	27.6908	25.3742	21.8978	17.6836	15.0443	11.7255	19.6533	19.4755	17.3594	8.33267	8.43434	8.09756	8.5061
	11	25.4705	28.8958	27.793	28.1991	23.9877	15.2117	9.93587	6.79559	12.5832	10.3487	9.96593	7.93548	8.94939	8.47358	9.44828
	12	29.6867	31.5667	25.8487	28.1781	24.5306	15.4696	8.07615	4.98998	5.69339	6.00602	6.62651	8.79798	9.92886	10.3765	8.54472
	13	28.3362	31.2335	30.4078	27.0802	22.9388	15.7565	9.68537	5.34269	5.20683	6.3996	8.61167	13.4089	14.2163
	14		26.2718	25.8808	20.7198	17.2863	13.7831	10.2918	7.0521	5.59036	7.32193	12.0504	19.3131	18.7181
	15			18.8286	13.8831	11.7919	10.7751	9.98397	8.06426	7.0664	9.40241	15.0889	21.185	19.8557
	16				8.43461	7.11623	8.13855	8.05812	8.77912	8.47485	11.1069	18.7911	22.8916	19.2994
	17					5.5493	5.83133	6.71486	6.8253	8.01811	9.73887	16.3293	21.002	16.1792
4	1					20.2309	22.7221	25.0417	25.2053	22.4324	18.6203	12.6376	12.0111	9.69888					4																		4
	2				21.7338	25.6481	26.7597	29.693	29.4258	26.2135	23.2687	18.0179	14.8697	12.509
	3			27.2021	26.0381	25.4234	22.5591	25.5717	27.1839	27.5011	23.9541	21.1131	17.4653	15.5578
	4		28.9805	29.3121	27.5962	23.0962	20.2337	21.1866	23.9557	25.7257	24.54	23.2835	20.7511	19.3728
	5	22.1272	26.5282	24.6736	20.9462	17.971	17.6046	18.4412	23.4874	24.2189	22.673	21.9071	21.8377	19.9301
	6	20.3634	21.5383	16.089	14.3582	12.5031	16.6136	17.2141	23.8473	23.7653	21.2929	19.7574	21.3948	21.9462	21.9506	22.9714
	7	17.8789	19.9358	17.9793	17.2547	16.2946	15.8186	19.0373	26.8734	26.1498	19.1464	18.2178	19.2248	20.1522	19.9594	20.4678
	8	21.4313	24.0811	19.7054	20.0668	19.1511	19.7872	22.5756	26.6958	26.7366	21.3881	18.2828	14.1289	14.6897	15.1447	16.5588
	9	27.6226	30.1525	23.6646		19.6213	21.096	20.9607	20.6783	24.0427	23.7389	18.6762	10.9405	11.8169	10.0187	9.18542
	10	30.0923	33.9368	26.515	23.4603	19.5595	16.7205	15.1104	12.5418	21.2825	20.77	18.3108	8.76278	8.94845	7.861	8.27859
	11	25.8	29.6111	26.5405	25.5456	22.0987	14.6577	9.83231	7.09776	13.5743	11.943	11.5723	7.86475	8.93814	8.05165	9.01656
	12	28.0112	29.4487	24.7841	25.8734	22.3849	15.2623	7.49489	5.42363	5.57434	5.58248	6.79226	9.04294	10.0144	9.27235	8.32568
	13	25.6038	27.9476	27.9956	25.1207	21.0041	14.165	8.12424	5.5112	5.0224	5.92261	8.43381	14.0592	14.3499
	14		25.0867	24.0233	18.7343	16.5844	11.8921	9.37959	6.57841	5.389	6.93279	12.5234	19.2934	18.5537
	15			18.5365	14.0945	10.5799	9.34082	9.2444	7.97149	7.14053	8.83707	14.7898	20.9064	18.8732
	16				8.68443	7.25662	7.87373	7.56619	8.6945	8.53157	9.97347	18.1102	21.8364	18.1983
	17					5.0818	5.46232	6.71633	7.02851	7.85102	9.30346	15.5553	20.5343	16.1954
5	1					22.7778	26.7217	26.8144	24.8489	22.2267	17.7405	13.3065	11.704	10.518					5																		5
	2				23.9156	28.7585	30.8211	32.7257	31.0754	27.1391	23.5619	18.6398	14.964	13.1377
	3			25.4772	25.6957	27.1289	26.2557	28.5616	28.3766	27.8915	25.2717	21.3786	16.7089	15.3198
	4		28.2821	27.5407	24.186	21.0967	18.9586	20.7505	23.9023	25.6292	25.1801	24.0917	20.1184	18.7961
	5	23.927	26.5826	23.9177	18.3926	15.9243	16.7449	17.5868	21.3714	23.9647	23.0502	23.4701	23.3815	21.3312
	6	23.6499	25.3545	18.6099	15.0959	12.7526	15.098	16.2407	20.8595	21.5146	20.9398	21.6957	24.0021	24.3038	24.6314	24.4338
	7	22.1722	25.5434	22.3429	19.1639	16.951	15.6163	17.7029	24.9752	26.052	18.9136	18.0635	19.4525	20.5272	21.81	21.1843
	8	23.7384	27.0353	23.1031	22.8998	22.6959	22.2029	23.8241	27.6756	27.1731	22.6184	18.2857	15.3837	15.812	15.618	17.6333
	9	30.2511	32.1695	25.5783		24.1872	25.0062	23.5276	22.2632	23.5758	23.1559	17.6134	11.0879	12.9243	11.9775	12.0123
	10	32.0841	36.3457	29.4756	27.1227	23.2562	19.3401	15.1798	12.4788	20.2964	19.3701	18.0808	8.87247	9.85918	9.35451	9.96082
	11	28.3112	33.1314	30.2615	29.2655	25.4066	15.6998	9.02632	6.75152	13.0727	11.2566	10.8117	8.46356	9.26273	10.1605	11.6495
	12	31.1375	33.5658	28.9346	29.7232	25.5647	15.0122	7.01818	5.0202	5.8404	5.97576	6.74141	9.15416	10.6045	10.9256	10.2195
	13	28.186	31.793	32.3753	28.2406	23.5922	14.5274	8.2202	5	5.28687	6.44848	8.85051	13.4291	14.2403
	14		25.7612	26.0336	20.1296	17.0468	12.8398	9.89474	6.75709	5.54545	7.34949	12.1542	18.6953	18.4907
	15			19.4816	12.5746	11.3313	10.2439	9.8202	8.03434	6.85628	8.96154	14.4675	21.1391	20.0165
	16				8.83299	8.26518	8.45455	8.43927	8.68966	8.53753	11.5091	17.4828	23.0164	18.4638
	17					5.93117	5.55152	6.90707	7.11765	7.96957	10.503	16.3665	21.8103	16.5217
6	1					21.5076	23.5066	22.4361	21.2357	20.6505	19.0156	14.1678	13.205	11.204					6																		6
	2				24.0237	27.0515	28.1494	28.3666	27.2581	26.2609	22.7611	19.7768	15.7848	13.6225
	3			28.4578	27.3742	26.3242	23.9474	25.1483	25.6987	26.2227	23.9545	21.7506	18.2953	16.9644
	4		32.2284	31.7633	28.4379	24.2809	19.4863	19.0398	22.0849	23.1139	23.7426	22.9024	21.4252	19.9046
	5	25.6164	27.8996	25.3904	21.207	17.2831	17.0517	16.6674	19.8924	21.8826	21.5699	20.0107	20.4935	20.7468
	6	22.7242	23.5385	17.5776	14.0558	11.9607	15	16.147	21.0632	21.2569	18.5094	18.2558	21.0803	22.9745	23.1493	23.4136
	7	20.4769	22.815	19.2656	18.6335	15.6206	13.3567	17.5714	23.9664	24.3151	17.334	16.8607	17.9937	20.021	20.8043	20.4701
	8	22.516	25.7396	20.7583	20.3417	19.0644	18.6074	20.3859	25.0702	24.8156	20.0984	16.5569	14.0491	15.8533	16.8545	17.9647
	9	28.5199	30.2921	24.1618		20.8981	20.6103	19.9774	19.5469	20.9837	21.0021	15.752	10.4837	12.1918	11.0943	11.5133
	10	29.3968	32.8783	26.0172	23.7569	21.1632	17.4053	14.4406	11.5255	19.6171	18.3561	16.3028	7.67683	8.40369	8.15226	9.16872
	11	23.9382	28.0268	26.6844	27.0283	22.6341	14.4156	9.11609	6.83299	12.2729	10.0652	9.48473	7.28049	8.46735	8.0082	8.6209
	12	27.4356	30.567	25.8658	26.8671	23.1461	14.4703	7.8167	4.50916	5.37271	5.42159	5.85132	7.28049	8.65644	8.71721	7.607
	13	26.3052	30.7876	30.0961	26.4316	20.8628	13.9061	8.48065	4.98371	5.389	6.18941	8.16497	11.11	11.7955
	14		26.148	25.4383	19.9212	15.8768	12.3849	9.72505	6.94094	5.77393	7.46531	11.749	17.4365	15.7984
	15			18.4771	12.9489	9.93047	9.00204	9.55601	8.47959	7.73984	9.03469	14.4529	19.5412	18.1379
	16				8.78119	6.76735	7.84318	8.19756	9.02653	8.75102	10.5861	17.1437	20.5227	16.4542
	17					5.05918	5.56735	6.61633	7.03666	7.86503	9.50102	15.3112	19.971	14.0356
7	1					20.6234	22.7965	23.0595	21.533	20.7395	19.9131	14.9596	11.8716	11.3634					7																		7
	2				22.818	27.2554	27.1183	28.4221	28.5403	26.5548	24.0288	20.1146	15.464	13.86
	3			27.2222	26.2569	25.6568	24.0924	25.154	26.6977	27.957	25.4367	21.7942	17.4392	15.9054
	4		30.2937	29.3482	25.7899	22.2731	18.1048	19.6164	22.8611	24.9705	24.7238	22.5011	20.2952	19.0865
	5	24.2452	26.2752	23.864	19.1438	16.1229	15.9582	17.0377	20.8228	23.182	22.5095	20.485	20.8571	20.2554
	6	21.6954	22.8875	17.575	13.6521	12.3021	14.8896	16.0522	20.891	22.5805	19.875	18.7757	20.966	21.5394	22.7415	23.0535
	7	19.5903	22.434	20.3326	18.9937	16.3417	14.0852	17.6279	25.1593	25.3887	19.2292	17.357	18.6092	18.6379	20.0295	19.2126
	8	21.7415	26.5146	22.4137	22.3235	21.0772	21.3515	22.4229	26.2635	25.0062	21.2707	17.4547	14.3465	14.8977	13.6983	16.7945
	9	27.1527	31.1501	25.6347		22.8163	23.5167	22.821	21.7269	22.6633	21.2437	17.3694	11.0903	11.8351	11.6195	11.7702
	10	28.8756	33.4124	28.3177	25.9811	21.499	17.4244	15.3285	12.1245	19.998	19.2708	17.5215	8.52254	8.68789	7.91529	9.85361
	11	24.4527	28.6876	27.8816	28.1026	22.8742	13.4406	9.05112	6.95102	12.7163	11.0306	10.5746	7.79713	8.99383	7.76132	10.6335
	12	30.1303	32.2819	28.4901	28.4731	22.6722	12.9918	7.17828	5.19796	5.50612	5.42449	6.21429	8.38525	10.1626	9.81818	9.35062
	13	28.1319	32.3728	32.3024	26.9517	20.767	12.5902	7.96939	5.2	5.06735	5.87143	7.97755	13.863	14.3943
	14		26.6429	26.2442	19.8267	14.9381	12.1656	9.19796	7.04082	5.47347	6.81224	11.6612	18.8238	18.3913
	15			18.1366	11.9774	9.27664	9.03469	9.32449	8.57959	6.80204	8.82857	14.3258	21.157	18.9541
	16				8.07755	6.07755	7.27403	7.58571	8.92857	8.2459	10.9714	17.2541	22.4292	18.2625
	17					4.17755	5.21837	6.45399	7.4102	8.20654	9.79959	15.9191	21.3591	14.9414
8	1					21.5278	25.517	24.0199	22.0397	20.719	19.0421	14.9553	11.4013	9.29148					8																		8
	2				25.0433	27.9004	30.0065	30.803	29.8156	26.0329	22.8385	20.4139	15.0738	12.3482
	3			30.3658	28.7932	28.7161	25.7384	27.7137	28.2891	27.4159	25.0959	22.9622	19.6971	16.6904
	4		32.1425	32.3511	30.083	25.9391	21.6122	22.2238	26.2447	26.7787	24.1717	23.5895	21.5877	19.3414
	5	24.8609	27.9099	26.0818	22.5228	19.7241	18.775	19.6785	24.7023	25.6918	23.0781	21.929	21.4708	20.9441
	6	23.3404	23.7854	18.1515	15.6058	14.7453	16.8799	18.2676	24.4668	25.5085	21.3992	19.2443	20.6258	21.7827	22.1932	22.2013
	7	20.6237	23.4979	19.4468	17.7743	17.8965	16.6494	19.0413	27.222	27.9435	21.501	18.4897	18.6479	19.1378	18.8419	19.6085
	8	23.3533	25.7331	21.8732	20.8524	21.2598	21.8012	24.2351	28.0269	26.3497	21.4888	17.6504	15.1605	15.4722	15.3979	16.7324
	9	29.2942	32.0516	25.3396		23.473	23.8124	23.843	23.0244	23.9758	22.1929	17.2616	11.9453	12.9654	11.2361	10.4793
	10	29.3148	33.5541	27.8777	25.0872	24.0021	19.6742	16.9919	13.2941	20.0384	19.0227	16.9315	10.0343	10.4429	8.89506	9.3786
	11	25.3533	29.6554	27.51	28.2713	25.12	16.9185	9.70183	8.25455	13.6162	11.7051	11.097	8.87247	10.2045	9.35876	9.72428
	12	29.1995	30.9206	25.1982	28.441	24.9646	16.497	7.99189	6.04251	6.14545	6.06073	6.59394	9.46061	10.664	10.6831	8.60788
	13	26.4635	30.049	29.9956	27.833	23.1479	15.1903	8.65657	6.28024	5.76162	6.42713	8.80404	14.6923	14.8537
	14		26.3753	26.3475	22.1625	17.8753	12.9187	9.75556	7.14141	6.08283	7.56768	12.6437	18.9633	18.5825
	15			18.5762	14.5615	11.002	10.3057	9.54141	8.66465	8.1899	9.63838	14.7556	20.6804	19.2857
	16				8.87984	7.47571	8.01215	7.93939	9.90909	10.0548	11.4469	17.3694	21.5647	16.9773
	17					5.00405	5.46964	6.76768	7.98988	9.20774	10.0878	15.0062	20.1219	14.2742
9	1					21.6814	25.6645	26.2071	25.6757	22.5667	18.6964	13.9116	13.0792	11.639					9																		9
	2				24.9541	28.8559	31.3978	32.2462	31.7956	29.0905	24.0243	19.2382	15.228	13.8004
	3			30.7889	30.2799	29.7356	26.1319	28.6709	29.5288	29.2636	25.5133	21.7946	17.4327	16.5303
	4		32.6798	32.3341	29.0149	25.0382	20.9237	20.947	24.707	27.3269	26.3435	23.3739	19.1286	18.1696
	5	25.905	27.6034	25.6337	19.5765	17.6562	17.3432	17.9326	23.5581	24.8182	23.3134	21.2599	20.0419	18.5881
	6	25.1407	25.0464	16.3591	13.3201	12.7071	15.8828	16.3214	23.0337	23.6369	21.4193	20.5805	21.2968	21.7848	21.933	22.6796
	7	21.7637	25.044	19.7206	17.9456	15.569	15.2013	17.8574	26.105	26.7702	20.5316	19.3285	19.0381	18.9894	19.9424	19.8846
	8	25.0882	28.0905	21.8214	21.0398	20.3354	21.3354	23.5388	27.9242	26.8037	22.9732	19.2004	16.2238	15.6479	15.1543	16.9686
	9	31.0843	32.3326	25.7783		23.6329	24.1875	24.2103	22.6803	23.6306	22.0444	18.1911	12.4714	12.9155	12.3582	10.9255
	10	31.0208	35.0622	28.2457	24.9468	23.1604	19.6214	16.4012	13.8435	21.0203	20.2355	17.8905	9.9939	10.8498	10.626	8.9625
	11	25.0826	29.2387	27.8119	26.7974	24.1106	16.3047	10.9063	7.57606	14.5294	12.6024	12.2252	8.48073	10.3552	10.1518	10.578
	12	28.7583	30.1549	26.4834	25.987	24.0603	16.1523	8.90428	5.65854	5.96957	6.10526	6.72967	9.10569	10.8279	11.112	9.225
	13	26.4553	29.6987	28.1239	25.6186	22.1475	14.9549	9.69246	5.4501	5.66802	6.46138	8.6572	12.8008	13.6578
	14		23.2217	23.1578	19.283	17.0971	12.9469	10.6065	7.24187	5.99797	7.19348	12.0609	17.9218	17.4784
	15			17.8378	13.4066	10.9122	9.68571	10.1055	8.45325	7.27291	9.23829	14.4376	20.1942	18.6214
	16				8.73824	7.2439	7.7439	8.28049	8.98577	8.8554	10.7882	17.308	22.5404	17.0391
	17					5.39431	5.42073	6.70528	7.25203	8.10366	9.31429	15.5764	20.9272	14.463
10	1					21.3117	23.919	22.6397	20.1674	18.096	17.2735	12.8668	11.034	9.66892					10																		10
18.0834	2				24.6833	28.3004	28.7957	29.0957	27.1597	23.0889	20.8192	17.8194	14.0698	12.8449
6.98792	3			30.0232	29.9085	29.1581	26.2921	27.1447	25.6416	25.4476	22.9015	20.4501	16.3058	15.5568
	4		31.7727	31.7403	28.6162	24.0642	18.4286	20.0064	23.2361	23.4936	22.4697	21.7815	19.4346	17.4834
	5	24.8091	26.8098	25.2173	19.403	16.1646	15.5063	16.7122	21.7484	23.1911	21.0872	19.9026	19.6528	18.7
	6	23.2733	23.2648	16.3523	12.327	11.1224	13.7722	15.2436	22.1365	22.703	18.3538	17.569	19.9574	20.4423	21.1524	21.9209
	7	20.0905	22.7811	18.6068	16.4557	14.692	12.8797	15.8613	25.055	24.4243	18.4165	16.5399	17.8753	17.9958	19.1787	18.4786
	8	23.6063	25.9387	21.1271	19.7857	18.4114	18.9556	21.2842	26.2636	26.5082	20.9855	18.1255	15.4896	16.4812	15.3832	16.2417
	9	30.2101	33.2303	26.7489		21.8439	22.2029	22.2831	22.3252	23.9265	21.9556	17.6951	11.3742	12.9857	11.7707	10.8148
	10	30.1918	34.2406	28.3182	25.6921	22.8714	19.6885	16.8484	13.7236	20.252	19.4555	17.7383	9.47035	10.1311	8.69136	8.89095
	11	24.2027	27.8742	26.2611	26.85	23.5967	15.8994	10.387	8.3313	13.5427	11.6159	11.8256	8.23014	10.0041	8.5823	8.7428
	12	29.132	30.0831	24.6044	27.3644	23.7505	15.7403	8.74134	5.99187	5.84146	5.93699	7.10569	8.68432	10.3525	9.87629	8.0433
	13	26.5885	29.82	29.5011	27.6142	23.104	15.6694	9.5102	6.0935	5.77033	6.56911	9.11179	13.2286	14.4074
	14		23.6474	25.1677	20.7469	18.7659	14.4551	10.6939	7.53659	5.95325	7.12805	12.4715	18.9201	18.1694
	15			18.176	13.7321	11.8364	10.8028	10.1606	8.93103	7.53347	9.5752	14.9167	21.154	20.6111
	16				9.31493	7.22041	8.48682	8.38211	9.30081	8.96531	11.372	17.6393	22.6193	19.2428
	17					5.46232	6.28803	7.08722	7.63618	8.60896	10.1327	16.2063	21.468	16.1523

## Sheet: FI
FractionationIndices
Signals of insufficient quality were excluded from the property maps. Signals could be rejected based on noise low amplitude, large artefacts or ventricluar farfields that could not be substracted. Fractionation index is particularly sensitive to noise. Therefore electrodes with substantial noise are more strictly excluded.
		1	2	3	4	5	6	7	8	9	10	11	12	13	14	15	16	17
1	1					3.14254	3.27333	2.91189	2.81473	2.65111	2.08869	2.12027	2.26058	2.6264					1																		1
	2				2.58333	2.56009	2.50644	2.48812	2.46087	2.02637	1.37611	0.734375	1.18667	2.2294
	3			2.2686	1.76141	2.00632	1.32708	1.82316	2.05308	1.58351	1.25219	1.46035	1.3326	1.94444
	4		3.47761	3.12288	1.91195	1.3737	1.22013	0.78125	1.7542	1.19368	1.39177	1.27887	1.4577	1.62309
	5	3.16274	2.42348	1.90041	1.2	0.810309	0.645228	0.864301	1.42348	1.5523	0.981053	1.30603	1.45161	1.02366
	6	2.67728	2.1625	1.76907	0.913758	0.749487	0.383984	0.962656	0.849057	1.98734	1	0.78125	1.07579	0.781316	1.7616	2.21186
	7	2.63579	2.5595	2.36701	2.22998	1.83093	0.640657	0.800821	2.37238	2.42977	1.05187	0.741273	0.523909	0.6125	1.04641	1.94316
	8	2.62527	2.59454	2.56785	2.75732	2.63354	2.33196	2.33539	2.59623	1.47551	0.855102	0.176471	0.220859	0.187243	0.632017	1.32365
	9	3.22637	2.72436	2.58193		2.47708	2.63202	2.15369	1.96538	1.36089		0.113131	0.141988	0.202454	0.465164	0.837782
	10	3.30594	3.16927	2.81545	2.75636	2.46058	2.02863	1.66194	1.27419	0.470825		0.0564516	0.16499	0.155102	0.590164	0.911523
	11	2.8092	3.10738	2.89556	2.91183	2.54527	1.83503	1.24395	0.615694	0.22334	0.100604	0.289738	0.175403	0.404472	0.860082	1.03306
	12	2.74718	2.75724	2.78795	2.79701	2.50515	1.74338	0.854839	0.484909	0.241449	0.299799	0.397177	0.559596	1.26327	1.30992	1.30977
	13	2.61656	3.17841	2.73377	2.57263	2.1499	1.56073	0.887324	0.426559	0.293763	0.720322	0.625	1.01623	1.83027
	14		2.47246	2.42647	1.87449	1.42041	1.48692	1.1328	0.462777	0.207243	0.760563	0.987903	2.21748	2.46107
	15			2.06432	1.23577	0.744422	1.11871	1.17505	0.847082	0.445565	0.977823	1.51008	2.28484	2.23299
	16				0.884848	0.416499	0.54326	0.93159	1.05242	0.546371	1.16194	0.92057	2.38889	2.29752
	17					0.483871	0.279678	0.957746	0.422535	0.573441	0.36714	1.94835	2.65839	2.32099
2	1					3.09111	3.20905	2.89177	2.97368	2.75877	2.17763	2.29018	2.30804	2.62192					2																		2
	2				2.57415	2.47966	2.59227	2.50426	2.50108	2.1128	1.49559	0.734375	1.29596	2.21875
	3			2.50209	1.91405	2.09623	1.38912	1.77406	2.03158	1.53961	1.23696	1.68363	1.4185	1.95565
	4		3.32135	3.19831	2.025	1.5052	1.29019	0.684647	1.65272	1.25625	1.40773	1.30905	1.66004	1.8208
	5	3.07991	2.48654	1.94215	1.30579	0.967146	0.768443	1.03534	1.35208	1.54167	1.0443	1.29526	1.75055	1.13072
	6	2.54393	2.28454	1.82546	1.03909	0.772074	0.451745	1.12008	0.703934	1.96234	0.83125	0.653361	1.01699	0.826552	1.70763	2.12262
	7	2.5343	2.53512	2.30515	2.28542	1.87654	0.690574	0.622177	1.89648	2.21712	1.01035	0.606996	0.43215	0.5842	1.13389	1.97674
	8	2.71308	2.64375	2.59959	2.58436	2.56315	2.3299	2.12757	2.41116	1.43878	0.824847	0.115619	0.196755	0.166324	0.65567	1.39004
	9	3.16703	2.74316	2.54375		2.29545	2.43035	2.17562	2.05081	1.40688		0.107071	0.174442	0.14898	0.516327	0.889344
	10	3.20635	3.05934	2.83906	2.575	2.42857	2.03469	1.79268	1.41903	0.494949		0.0607287	0.166667	0.118126	0.562372	0.863265
	11	2.87443	3.05066	2.84649	2.8	2.51852	1.94456	1.39676	0.680808	0.236364	0.10303	0.29899	0.117172	0.320408	0.77459	1.02869
	12	2.49776	2.70288	2.68421	2.87339	2.48049	1.74082	0.959432	0.493927	0.2	0.327273	0.389899	0.567677	1.28163	1.26844	1.31828
	13	2.21413	2.96711	2.61159	2.54025	2.20902	1.58097	0.862069	0.385859	0.264646	0.688889	0.622222	1.08519	1.89775
	14		2.23256	2.36192	1.91304	1.40365	1.47177	1.11313	0.49899	0.185859	0.757576	0.953441	2.33129	2.54713
	15			2.0186	1.45194	0.803644	1.15789	1.18384	0.850505	0.398785	0.985859	1.53157	2.23975	2.17864
	16				1.09369	0.528226	0.612903	0.90101	0.991919	0.595142	1.21053	0.834694	2.38289	2.13963
	17					0.582661	0.406061	1.06263	0.484848	0.578947	0.348269	1.6701	2.57464	2.36626
3	1					3.1828	3.37849	2.99352	2.85903	2.4469	1.89062	2.03146	2.27314	2.80769					3																		3
	2				2.67452	2.5074	2.60897	2.53518	2.32479	1.94505	1.24053	0.669643	1.24161	2.20852
	3			2.4728	1.93711	2.19624	1.41545	1.775	1.88655	1.48511	1.28448	1.56473	1.37416	2.01774
	4		3.48723	3.16667	1.92355	1.46901	1.29193	0.814969	1.74004	1.16771	1.39746	1.28758	1.62664	1.75109
	5	3.16981	2.71369	1.96926	1.0616	0.926078	0.55144	1.0249	1.42116	1.39419	1.09454	1.30917	1.56959	1.07296
	6	2.58004	2.26337	1.9102	0.80123	0.784836	0.326489	1.01653	0.775934	1.83891	0.80083	0.752599	1.16597	0.822034	1.87924	2.19579
	7	2.54772	2.56082	2.43505	2.31493	1.92041	0.571429	0.698574	2.34783	2.54071	1.00208	0.767967	0.524793	0.560417	1.00835	1.85239
	8	2.62264	2.3963	2.52049	2.83745	2.78395	2.50513	2.42418	2.76033	1.31846	0.816162	0.127273	0.210526	0.217659	0.590909	1.25873
	9	3.19444	2.78224	2.62004		2.59548	2.67347	2.34553	2.12525	1.35743		0.0863454	0.150905	0.157895	0.490798	0.856851
	10	3.50113	3.32314	3.04894	2.84823	2.62986	2.23935	1.80282	1.31864	0.462926		0.0682731	0.166333	0.137374	0.556911	0.869919
	11	2.83409	3.22395	3.12115	3.11991	2.64198	2.04637	1.29259	0.697395	0.216433	0.0901804	0.266533	0.135081	0.376518	0.737805	1.00609
	12	2.59333	2.78222	2.86404	2.90558	2.6102	1.89474	0.913828	0.466934	0.246	0.290581	0.373494	0.567677	1.28049	1.24696	1.26626
	13	2.31847	3.26211	2.82646	2.72996	2.46531	1.75654	0.991984	0.372745	0.319277	0.688755	0.645875	1.13765	1.9551
	14		2.41401	2.49687	2.04294	1.46626	1.64458	1.10865	0.436874	0.198795	0.7666	1.02218	2.24444	2.55668
	15			2.32653	1.37903	0.741414	1.2751	1.14429	0.823293	0.368209	0.949698	1.59192	2.29675	2.12195
	16				0.997988	0.529058	0.656627	0.937876	0.959839	0.561368	1.18952	0.829615	2.35787	2.22403
	17					0.561368	0.37751	1.0743	0.455823	0.585513	0.317814	1.75	2.61429	2.38211
4	1					3.00654	3.19037	2.97368	2.93157	2.80931	2.01766	1.95973	2.09111	2.56502					4																		4
	2				2.70779	2.40129	2.46537	2.53092	2.63871	2.01961	1.18062	0.636161	1.19731	2.06726
	3			2.37895	1.79237	2.09149	1.38819	1.77426	1.99154	1.57173	1.21179	1.38803	1.16107	1.84222
	4		3.30736	3.08493	2.14376	1.55439	1.31579	0.631027	1.67089	1.36076	1.43413	1.20659	1.5	1.66009
	5	2.97634	2.42589	1.98133	1.26087	0.975155	0.741201	0.972689	1.32563	1.58105	1.05696	1.28294	1.60606	0.991266
	6	2.34664	2.17598	1.9441	1.02692	0.917184	0.407025	1.06653	0.721757	2.08879	0.924686	0.732068	1.09442	0.774194	1.69742	2.23516
	7	2.14614	2.27122	2.21074	2.19462	1.89212	0.76701	0.726141	1.96624	2.35865	1.08577	0.709544	0.502101	0.488372	1.05342	1.8176
	8	2.35307	2.31393	2.3278	2.53236	2.36853	2.27479	2.09524	2.4625	1.45885	0.889117	0.17623	0.189189	0.165618	0.689727	1.34454
	9	2.96095	2.59322	2.48101		2.29916	2.46973	2.19876	2.03484	1.40447		0.156823	0.162218	0.150206	0.481328	0.9125
	10	3.38288	3.04139	2.70299	2.42887	2.29645	2.12836	1.75256	1.38289	0.538618		0.0920245	0.210634	0.134021	0.539419	0.906445
	11	2.83409	3.13778	2.74836	2.57749	2.48529	1.93814	1.40286	0.610998	0.221996	0.152749	0.362525	0.211066	0.36701	0.836777	1.04969
	12	2.60626	2.70312	2.70485	2.69528	2.46862	1.84221	0.977505	0.490835	0.199593	0.350305	0.435845	0.599182	1.28247	1.27859	1.30271
	13	1.98729	3.06332	2.76805	2.73276	2.21031	1.60081	0.983707	0.407332	0.283096	0.720978	0.651731	1.07959	2.01242
	14		2.20507	2.65042	2.24059	1.33951	1.4501	1.06939	0.468432	0.195519	0.737271	0.98167	2.22727	2.47727
	15			2.32985	1.40657	0.67623	1.1102	1.02851	0.796334	0.415479	0.959267	1.52449	2.30353	2.12682
	16				1.07582	0.458248	0.600815	0.894094	0.95112	0.509165	1.18367	0.812245	2.32919	2.21086
	17					0.603272	0.360489	0.938776	0.466395	0.538776	0.331976	1.82787	2.55717	2.41788
5	1					3.12174	3.27549	3.15284	2.97333	2.56	1.92841	2.0783	2.16816	2.62838					5																		5
	2				2.69831	2.57627	2.69612	2.67603	2.49138	2.04415	1.35398	0.776286	1.1982	2.2009
	3			2.43568	1.95031	2.14345	1.48866	1.881	1.95816	1.48936	1.27391	1.49443	1.38222	1.88063
	4		3.35684	3.06889	1.78306	1.41975	1.32298	0.756701	1.79834	1.14167	1.41102	1.25764	1.46711	1.65351
	5	3.15451	2.58678	2.01852	1.02863	0.895706	0.536735	1.06198	1.47095	1.42412	1.14226	1.38675	1.61422	1.03226
	6	2.53459	2.22699	1.87269	0.67551	0.768916	0.318367	1.12963	0.729339	1.90625	0.90249	0.824017	1.22432	0.85443	1.72881	2.25855
	7	2.53527	2.57851	2.40612	2.27254	1.98571	0.646939	0.709016	2.32919	2.47193	0.971193	0.684426	0.547521	0.631799	1.01253	2.08898
	8	2.72996	2.67775	2.81443	2.77914	2.65306	2.42213	2.23722	2.57231	1.41141	0.861224	0.14898	0.253061	0.200413	0.76618	1.44792
	9	3.20087	2.83898	2.72443		2.5679	2.56173	2.2454	2	1.46869		0.137652	0.194274	0.179959	0.555328	0.936475
	10	3.45909	3.25383	2.95754	2.89189	2.57231	2.17515	1.73333	1.28687	0.449597		0.0707071	0.176113	0.163265	0.661885	0.954639
	11	2.91076	3.24944	3.07033	2.99358	2.65503	1.9716	1.32591	0.591919	0.185859	0.0969697	0.263158	0.176113	0.399185	0.882716	1.10103
	12	2.54545	2.57456	2.72985	2.80687	2.49281	1.74037	0.957576	0.535354	0.220202	0.319192	0.363636	0.541582	1.38934	1.37397	1.38095
	13	2.27484	3.04357	2.63113	2.58996	2.10246	1.63083	0.872727	0.461538	0.325253	0.686869	0.581818	1.06073	1.94908
	14		2.45203	2.43697	1.84774	1.31772	1.58824	1.19636	0.469636	0.234343	0.662626	0.979716	2.33538	2.57526
	15			2.14754	1.32311	0.75	1.22967	1.21414	0.844444	0.40081	0.923077	1.52846	2.35787	2.30247
	16				1	0.51417	0.666667	1.04049	1.07302	0.535497	1.26465	0.858012	2.36961	2.30228
	17					0.617409	0.420202	1.11717	0.440162	0.456389	0.395538	1.78261	2.69485	2.39669
6	1					3.09368	3.44323	2.85022	2.87004	2.55385	2.21826	2.07383	2.23198	2.67562					6																		6
	2				2.65591	2.43991	2.56277	2.47939	2.3449	2.01522	1.35841	0.625	1.3565	2.17303
	3			2.40842	1.87104	2.00424	1.38526	1.77119	1.79274	1.47752	1.14719	1.50557	1.43177	1.902
	4		3.46336	3.17697	2.26316	1.54927	1.34737	0.765199	1.60934	1.12025	1.26383	1.21692	1.52711	1.69848
	5	3.19397	2.49582	1.98121	1.24224	0.913223	0.743802	1.04393	1.37342	1.36897	1.01695	1.14925	1.39224	0.854978
	6	2.57474	2.16424	1.83851	0.811983	0.826446	0.427984	1.01863	0.694737	1.90446	0.795407	0.721174	0.926004	0.740977	1.63326	2.15352
	7	2.48319	2.50936	2.42946	2.24224	1.81031	0.63299	0.521739	2.06933	2.2563	0.981211	0.596674	0.407098	0.442348	0.997872	1.97863
	8	2.57143	2.45417	2.59792	2.75417	2.48441	2.09298	2.02905	2.36364	1.47541	0.836066	0.130081	0.188139	0.159091	0.590437	1.34719
	9	3.18584	2.75267	2.47899		2.43451	2.46186	2.17043	1.9102	1.27495		0.101626	0.134146	0.140816	0.467213	0.831622
	10	3.33333	3.12168	2.7897	2.61407	2.34711	2.00412	1.67008	1.21792	0.425662		0.0569106	0.142276	0.0778689	0.510288	0.839506
	11	2.96796	3.09172	2.8	2.71957	2.41996	1.90947	1.26069	0.604888	0.177189	0.0855397	0.254582	0.134146	0.293878	0.766393	0.967213
	12	2.45556	2.78125	2.70917	2.83007	2.44259	1.76074	0.857434	0.415479	0.197556	0.315682	0.374745	0.50813	1.18814	1.23156	1.2284
	13	2.20259	3.0531	2.67031	2.61538	2.22869	1.57551	0.837067	0.407332	0.266802	0.688391	0.580448	0.95723	1.78732
	14		2.37209	2.51277	2.0166	1.3039	1.41955	1.08147	0.460285	0.219959	0.679592	0.944898	2.15574	2.40535
	15			2.275	1.29857	0.754601	1.1	1.13238	0.838776	0.369919	0.953061	1.54713	2.20576	2.18724
	16				1.08384	0.518367	0.596741	0.97556	1.01633	0.453061	1.19057	0.743326	2.30372	2.25
	17					0.502033	0.357143	1.06735	0.405295	0.456033	0.310838	1.73237	2.57261	2.4205
7	1					3.2959	3.35281	2.8304	2.71366	2.47461	2.12918	2.05393	2.15766	2.64108					7																		7
	2				2.82013	2.57296	2.50968	2.49134	2.27669	2.02632	1.37029	0.626966	1.17117	2.18284
	3			2.53459	1.89172	2.05297	1.43908	1.72363	1.86892	1.51183	1.24017	1.48098	1.3018	1.81306
	4		3.57667	3.09766	1.98109	1.40546	1.24948	0.677149	1.68	1.18105	1.3576	1.28665	1.44273	1.58093
	5	3.03226	2.48529	1.88494	1.14583	0.925	0.634656	0.924528	1.35865	1.30126	1.08632	1.29614	1.54762	0.993506
	6	2.47479	2.12292	1.74583	0.808333	0.808333	0.35625	0.881002	0.72956	2.0339	0.833333	0.677149	1.12128	0.889126	1.80769	2.20771
	7	2.45283	2.37317	2.3954	2.20877	1.95	0.586279	0.5842	2.32075	2.43067	0.9125	0.693111	0.432773	0.530526	1.13502	1.92211
	8	2.71154	2.50837	2.60499	2.7479	2.63466	2.33264	2.16667	2.52697	1.46488	0.86157	0.158436	0.190871	0.173278	0.624473	1.36268
	9	3.14823	2.75687	2.59081		2.48643	2.60625	2.23251	2.03696	1.33061		0.136735	0.151951	0.169072	0.56341	0.89234
	10	3.39862	3.19734	2.91898	2.71849	2.43685	2.17598	1.71253	1.26735	0.45102		0.0756646	0.161885	0.174538	0.60124	0.901031
	11	2.72286	3.05393	2.75219	2.72863	2.44948	1.90369	1.33333	0.610204	0.181633	0.114286	0.278119	0.155738	0.360082	0.800412	1.07039
	12	2.62022	2.79195	2.59382	2.69032	2.42268	1.81967	0.981557	0.536735	0.218367	0.334694	0.371429	0.571721	1.32716	1.40083	1.36722
	13	2.01064	3.0307	2.65011	2.52731	2.15464	1.6373	0.955102	0.461224	0.279592	0.669388	0.52449	0.952965	1.94661
	14		2.38655	2.50947	2.05846	1.41031	1.49489	1.19388	0.561224	0.263265	0.77551	0.867347	2.30533	2.53209
	15			2.2236	1.45585	0.795082	1.15714	1.20816	0.930612	0.461224	1.02653	1.54918	2.26653	2.29436
	16				1.03469	0.497959	0.613497	1.00408	1.01633	0.514344	1.25102	0.811475	2.49167	2.26042
	17					0.62449	0.455102	1.06135	0.434694	0.570552	0.400818	1.82988	2.65762	2.3954
8	1					3.0235	3.21277	2.81195	2.69536	2.4469	2.07982	2.07812	2.11659	2.60403					8																		8
	2				2.75541	2.55844	2.48052	2.37013	2.34273	1.9693	1.29204	0.675615	1.217	2.08482
	3			2.62658	1.93882	2.16102	1.37764	1.74526	2.01071	1.43534	1.21351	1.57556	1.26281	1.78619
	4		3.63377	3.15957	2.1	1.59034	1.2935	0.792887	1.81224	1.26596	1.34764	1.27729	1.45175	1.63216
	5	3.18696	2.57442	1.97694	1.38589	0.937759	0.9	1.03132	1.45073	1.59958	0.989451	1.25591	1.52916	0.95914
	6	2.59362	2.21042	1.87552	1.01245	0.805383	0.559006	1.09129	0.622407	1.98093	1.02703	0.778706	1.15433	0.780591	1.75372	2.2334
	7	2.43671	2.45417	2.3048	2.27122	1.93582	0.767635	0.63843	2.03942	2.51674	1.09278	0.748971	0.479167	0.490605	1.01923	1.85532
	8	2.66595	2.50424	2.55717	2.6736	2.58144	2.38923	2.24948	2.59298	1.60327	0.92229	0.219512	0.226337	0.2	0.652083	1.30083
	9	3.20575	2.89032	2.64151		2.45436	2.62887	2.39876	2.13849	1.52525		0.140845	0.204453	0.158537	0.560575	0.942149
	10	3.4157	3.27152	2.897	2.71915	2.48963	2.17623	1.87195	1.46653	0.518145		0.0665323	0.169355	0.136735	0.592593	0.884774
	11	2.69746	3.13739	2.85078	2.78775	2.54737	2.08147	1.41988	0.723232	0.248485	0.123232	0.319192	0.17004	0.357873	0.812371	1.05761
	12	2.53288	2.678	2.5657	2.86026	2.62083	1.88641	0.979716	0.534413	0.288889	0.37247	0.410101	0.553535	1.27291	1.31481	1.361
	13	2.01285	3.12918	2.64381	2.59743	2.3125	1.59717	0.907071	0.441532	0.309091	0.726721	0.612121	1.04049	1.8313
	14		2.27719	2.41791	2.01667	1.39709	1.65854	1.15758	0.525253	0.286869	0.721212	0.977733	2.11837	2.43992
	15			2.09395	1.40574	0.691207	1.11741	1.07677	0.80404	0.448485	0.987879	1.53971	2.26392	2.2236
	16				1.00407	0.512146	0.562753	0.89899	0.967677	0.470588	1.0898	0.814286	2.23203	2.24124
	17					0.520243	0.362348	0.99596	0.398785	0.446029	0.308163	1.69072	2.52893	2.36701
9	1					3.13024	3.42163	3.00223	2.97748	2.57778	2.0067	1.99773	2.13801	2.51345					9																		9
	2				2.77729	2.61354	2.76484	2.61438	2.47473	2.01545	1.27876	0.725843	1.10835	2.08296
	3			2.46908	1.76709	2.1855	1.42553	1.85563	2.0064	1.57081	1.15929	1.52679	1.2713	1.74831
	4		3.43202	3.25216	2.11514	1.69214	1.41525	0.663136	1.64119	1.4359	1.41522	1.28097	1.4745	1.59821
	5	3.20086	2.62687	2.02316	1.19078	0.884696	0.968421	0.962105	1.35729	1.5518	1.09382	1.27313	1.46035	0.942731
	6	2.79957	2.33966	1.80167	0.903766	0.761506	0.554393	1.08403	0.764211	2.03397	0.93501	0.701271	1.06237	0.863043	1.73866	2.22796
	7	2.74051	2.79455	2.43067	2.31799	1.88912	0.794549	0.651992	2.11345	2.27872	1.0654	0.677755	0.447034	0.54661	0.989339	1.87179
	8	2.95269	2.8	2.71639	2.70231	2.59958	2.39413	2.13208	2.47789	1.57025	0.954639	0.247444	0.26694	0.21875	0.604651	1.26415
	9	3.47894	3.0216	2.72708		2.55274	2.63125	2.30928	2.04508	1.39796		0.170732	0.181633	0.164948	0.507246	0.908903
	10	3.55196	3.28667	3.02991	2.81064	2.45833	2.19547	1.78411	1.31911	0.492901		0.0892495	0.227642	0.197531	0.654959	0.945833
	11	2.82339	3.24775	2.98009	2.88235	2.5762	1.98773	1.389	0.675456	0.184584	0.125761	0.322515	0.174442	0.420945	0.931393	1.13098
	12	2.54324	2.65044	2.82705	2.88503	2.6237	1.89506	0.959267	0.538618	0.188641	0.289474	0.402439	0.601626	1.27664	1.34232	1.36042
	13	2.11489	2.95852	2.6087	2.60381	2.22336	1.71311	0.949084	0.405295	0.293522	0.648374	0.643002	1.06707	1.90369
	14		2.27932	2.40085	2.01677	1.42149	1.64082	1.09736	0.416667	0.213415	0.700611	0.855984	2.2428	2.48049
	15			2.04574	1.38809	0.802041	1.26531	1.18458	0.843496	0.397149	0.95723	1.54192	2.33264	2.2716
	16				1.03067	0.585366	0.605691	0.95935	1.04268	0.541752	1.20163	0.854209	2.35611	2.34908
	17					0.52439	0.288618	0.947154	0.463415	0.457317	0.37551	1.70248	2.65904	2.33128
10	1					3.02597	3.16193	2.77948	2.70705	2.42188	1.89462	2.0158	2.18367	2.54054					10																		10
1.53993	2				2.75922	2.53219	2.57609	2.43696	2.2035	1.82222	1.1317	0.623025	1.20946	2.09888
0.880135	3			2.48312	1.81277	2.10684	1.36674	1.75957	2.00644	1.41485	1.1291	1.39024	1.25446	1.69265
	4		3.47186	3.23391	2.23241	1.45182	1.22601	0.722458	1.68455	1.26809	1.33333	1.19868	1.40798	1.61641
	5	3.27549	2.54915	1.80591	1.22152	0.877637	0.983122	0.965885	1.33689	1.42038	0.953191	1.12121	1.39738	0.945652
	6	2.55297	2.23305	1.66245	0.888186	0.799578	0.485232	0.976695	0.654584	1.94231	0.800847	0.624204	0.925373	0.816239	1.79614	2.17949
	7	2.43368	2.41684	2.24313	2.12025	1.78692	0.64346	0.605042	2.08668	2.20682	0.926004	0.628151	0.374207	0.501062	1.00851	2.03205
	8	2.60504	2.49471	2.56992	2.64706	2.42405	2.27484	2.17684	2.47908	1.52263	0.865145	0.211934	0.246888	0.191667	0.614737	1.38542
	9	3.29103	2.86567	2.62553		2.40928	2.58159	2.17355	2.04294	1.38776		0.121951	0.161554	0.14959	0.495868	0.839506
	10	3.35388	3.17881	2.84199	2.63694	2.43983	2.01025	1.84426	1.47967	0.455285		0.0547667	0.165644	0.127049	0.553498	0.886831
	11	2.69021	3.12584	2.93142	2.7413	2.45885	1.93224	1.36864	0.739837	0.219512	0.109756	0.273834	0.132383	0.383197	0.825103	1.05144
	12	2.42282	2.64045	2.68889	2.71584	2.52577	1.78528	0.922607	0.528455	0.23374	0.359756	0.388211	0.513238	1.22541	1.2866	1.29691
	13	1.8081	3.04222	2.7593	2.64655	2.25988	1.71047	0.936735	0.463415	0.339431	0.786585	0.654472	1.05918	1.83333
	14		2.3113	2.44161	2.0332	1.3039	1.68163	1.21429	0.518293	0.215447	0.729675	1.00407	2.2377	2.48967
	15			2.19048	1.48671	0.799591	1.2622	1.18089	0.837728	0.421907	0.95122	1.48374	2.30801	2.20782
	16				1.05102	0.528571	0.604462	1.01423	0.97561	0.559184	1.11179	0.788934	2.19753	2.18313
	17					0.549898	0.397566	1.01826	0.47561	0.515275	0.326531	1.72917	2.55464	2.27926

## Sheet: BT
NumberOfStartingPointsBT
Signals of insufficient quality were excluded from the property maps. Signals could be rejected based on noise low amplitude, large artefact or ventricluar farfields that could not be substracted. Breaktrough can only be identified if a contiguous circle of electrodes enclose the electrode of interest. Therefore electrodes at the border or around a missing electrodes are excluded.
		1	2	3	4	5	6	7	8	9	10	11	12	13	14	15	16	17
1	1																		1																		1
	2						9	3	1	4	8	4	3
	3						15	3	8	8	5	8	14
	4				3	2	6	5	6	6	1	11	5
	5			5	1	1	2	3	1	9	11	18	5
	6		8	11	4	5	1	7	3	6	5	6	2	1
	7		9	9	8	3	6	11	8	2	5	2	2	0	4
	8		9				9	16	8	3	0	1	2	0	1
	9		4				10	7	3	0	8	1	1	1	0
	10		10				18	11	4	1	6	1	1	1	1
	11		12	35	9	7	13	12	8	1	0	0	1
	12		12	18	1	13	8	11	9	3	0	1	0
	13			13	1	0	4	4	1	0	0	0	0
	14				3	4	11	5	0	4	1	3	1
	15					7	7	13	1	5	1	1	6
	16						7	2	0	0	0	4	4
	17
2	1																		2																		2
	2						12	2	5	6	15	6	3
	3						15	0	3	5	6	7	13
	4				0	0	2	5	3	7	2	13	2
	5			6	0	1	0	2	1	10	8	12	2
	6		4	8	4	3	1	5	3	4	1	2	4	1
	7		9	7	4	2	12	10	7	2	3	1	2	1	2
	8		7				11	9	6	0	0	0	5	5	1
	9		2				6	2	1	1	8	0	0	1	1
	10		10				17	7	2	3	6	2	1	0	1
	11		12	29	14	1	8	2	5	1	0	1	2
	12		10	16	6	15	4	6	6	3	0	0	0
	13			11	12	8	2	0	1	1	0	1	0
	14				5	3	6	3	1	3	0	1	4
	15					4	4	10	0	6	3	3	7
	16						9	7	2	1	0	0	0
	17
3	1																		3																		3
	2						5	3	2	4	12	11	3
	3						8	2	5	4	9	4	8
	4				3	1	0	6	4	6	8	13	6
	5			4	3	2	0	2	0	4	7	12	5
	6		6	13	3	3	3	4	2	5	2	6	3	1
	7		8	9	3	2	12	7	3	0	2	4	1	1	2
	8		12				19	12	3	0	0	1	1	1	2
	9		4				7	2	3	1	9	1	0	2	0
	10		7				16	5	6	2	5	0	0	1	0
	11		9	20	13	4	11	6	4	0	0	0	1
	12		17	17	7	7	6	6	7	0	0	0	0
	13			13	10	10	3	1	1	0	0	0	0
	14				6	3	3	5	1	2	0	2	3
	15					0	3	4	1	4	2	3	6
	16						3	3	1	0	1	2	2
	17
4	1																		4																		4
	2						5	6	3	3	4	2	2
	3						17	3	11	5	5	11	7
	4				2	0	7	7	4	4	4	11	2
	5			4	0	0	1	2	4	19	6	12	4
	6		1	9	3	2	2	3	2	5	8	2	1	3
	7		8	6	3	1	8	8	3	4	0	0	1	1	2
	8		6				6	6	6	1	1	1	0	2	3
	9		2				4	1	2	2	3	1	0	4	1
	10		7				13	9	4	4	5	1	0	1	0
	11		9	27	10	3	9	7	7	2	3	1	1
	12		7	17	7	11	6	4	5	0	0	0	0
	13			13	7	4	2	2	0	0	0	0	0
	14				7	5	6	8	2	3	0	5	2
	15					2	5	12	1	8	3	3	7
	16						8	2	0	0	0	2	1
	17
5	1																		5																		5
	2						15	7	2	1	8	7	1
	3						12	2	6	4	12	10	3
	4				2	2	1	8	2	4	6	14	2
	5			6	1	0	1	2	1	6	8	17	6
	6		6	7	0	5	5	2	2	7	4	7	6	2
	7		5	5	2	1	8	11	3	8	1	1	1	0	2
	8		4				9	9	7	1	4	2	2	4	2
	9		6				12	8	4	2	5	1	2	4	1
	10		9				13	5	6	3	5	2	0	5	0
	11		11	28	18	4	4	6	11	0	0	3	1
	12		16	18	7	9	0	3	3	3	0	1	1
	13			16	8	3	1	3	1	0	0	0	0
	14				4	3	12	4	0	1	0	1	2
	15					2	7	9	1	4	2	1	4
	16						4	8	0	0	1	1	7
	17
6	1																		6																		6
	2						10	8	3	5	8	3	4
	3						18	6	2	5	12	12	7
	4				2	4	5	6	5	7	3	10	5
	5			7	2	1	1	2	0	4	8	12	4
	6		5	14	3	4	7	2	3	6	0	7	3	1
	7		5	6	6	5	5	3	4	5	4	2	1	1	2
	8		6				6	12	7	1	2	0	2	3	2
	9		7				3	6	1	0	6	0	0	0	1
	10		4				6	5	1	1	9	1	0	0	0
	11		9	22	3	4	7	2	8	0	0	2	2
	12		17	20	8	18	2	6	7	4	0	0	0
	13			8	7	5	3	4	1	3	0	0	0
	14				5	3	2	2	0	3	0	4	2
	15					2	4	5	0	4	4	3	1
	16						4	2	0	0	1	1	2
	17
7	1																		7																		7
	2						12	7	1	9	9	6	3
	3						13	4	5	6	6	3	9
	4				2	7	2	11	7	6	4	10	3
	5			2	2	1	2	2	1	4	7	12	4
	6		7	16	5	7	2	2	9	3	3	4	1	1
	7		8	3	1	4	13	3	3	4	3	0	1	1	2
	8		6				5	10	3	0	2	1	1	5	1
	9		7				4	1	1	1	7	0	0	2	1
	10		12				5	4	2	0	7	0	0	3	1
	11		11	21	14	7	2	4	7	1	1	2	0
	12		13	15	4	21	5	4	4	3	0	0	0
	13			17	9	13	0	0	0	0	0	0	0
	14				4	3	4	4	0	2	0	3	1
	15					3	8	10	2	11	2	2	4
	16						6	6	0	1	0	0	3
	17
8	1																		8																		8
	2						9	7	5	6	8	3	4
	3						10	4	3	8	5	8	16
	4				3	3	12	9	3	2	2	9	2
	5			4	2	4	2	3	4	4	6	6	3
	6		11	12	4	5	7	3	7	5	5	4	3	4
	7		11	9	4	8	12	12	7	5	4	2	1	0	2
	8		11				7	11	10	0	1	2	1	3	6
	9		1				4	4	1	1	5	0	1	1	1
	10		18				15	10	4	6	9	1	1	1	0
	11		15	28	13	9	7	8	9	0	1	1	2
	12		8	24	3	28	4	4	6	1	1	1	0
	13			16	7	10	1	4	1	1	1	0	1
	14				8	5	3	5	2	4	0	4	1
	15					3	8	9	1	3	5	2	7
	16						4	4	0	0	1	2	5
	17
9	1																		9																		9
	2						6	5	6	3	10	1	5
	3						20	7	10	8	6	5	8
	4				5	2	7	8	2	3	0	10	5
	5			3	3	3	4	3	0	10	6	13	6
	6		5	13	2	7	4	3	2	3	6	4	5	1
	7		12	5	3	3	3	20	2	2	3	4	1	1	4
	8		12				7	5	1	2	0	0	0	4	2
	9		7				5	1	1	1	5	1	2	4	1
	10		7				12	3	0	2	6	0	2	3	0
	11		10	21	12	4	8	2	6	2	0	0	1
	12		11	24	1	9	4	2	5	2	0	2	1
	13			12	6	3	3	6	1	3	0	0	0
	14				4	4	5	12	3	1	2	4	0
	15					2	7	4	3	8	4	5	5
	16						4	6	1	0	0	1	3
	17
10	1																		10																		10
4.80556	2						15	6	1	0	16	8	16
4.57613	3						5	5	3	11	9	8	15
	4				1	1	5	7	5	4	3	8	5
	5			5	4	3	2	0	2	6	7	9	10
	6		1	12	4	3	5	1	1	4	3	3	3	1
	7		9	6	4	2	6	7	2	1	1	0	1	4	1
	8		10				8	6	6	0	3	0	1	1	3
	9		10				7	6	3	0	6	1	0	0	2
	10		4				9	14	4	1	9	2	1	1	1
	11		12	23	11	3	9	10	12	1	2	2	1
	12		7	21	4	17	8	15	11	2	0	0	1
	13			14	5	8	6	5	3	1	1	0	0
	14				5	4	4	7	1	4	0	0	4
	15					3	4	6	0	4	1	0	4
	16						7	2	3	0	1	0	4
	17

## Sheet: CV
MeanVelocity
Signals of insufficient quality were excluded from the property maps. Signals could be rejected based on noise low amplitude, large artefact or ventricluar farfields that could not be substracted.
		1	2	3	4	5	6	7	8	9	10	11	12	13	14	15	16	17
1	1					1.33397	1.0874	1.18628	1.06838	1.07219	1.1093	1.32972	1.59781	2.03571					1																		1
	2				1.1637	1.27793	1.07499	0.976332	0.903009	0.877207	0.908309	1.14075	1.41487	1.76035
	3			0.859532	0.981146	1.06208	0.929957	0.872698	0.783725	0.729205	0.792108	1.08629	1.38865	1.54833
	4		0.798418	0.875091	0.862414	0.961042	0.868967	0.765006	0.684018	0.634578	0.726188	0.882375	1.06479	1.2431
	5	0.80561	0.918169	0.91457	0.792052	0.826074	0.843648	0.756512	0.674059	0.63629	0.730191	0.801488	0.93124	1.07963
	6	0.92634	0.965818	0.847646	0.868587	0.764403	0.793682	0.74318	0.631236	0.605061	0.628284	0.727598	0.790018	0.854513	1.16831	1.65955
	7	1.09454	1.05025	0.999407	0.927526	0.845055	0.761534	0.678734	0.711495	0.644632	0.609006	0.694498	0.775263	0.860013	1.13387	1.52487
	8	1.17966	1.12215	1.09412	1.06045	0.932261	0.861856	0.731894	0.715073	0.615311	0.623594	0.707324	0.854174	0.91954	1.18855	1.66581
	9	1.12505	1.23954	1.23026		1.13708	1.08759	0.895171	0.700378	0.650496	0.711824	0.759943	0.868378	0.961776	1.24593	1.89442
	10	1.09975	1.28708	1.2903	1.27591	1.3499	1.31693	1.04098	0.874996	0.81316	0.804458	0.827545	0.955718	1.10069	1.4423	2.27419
	11	0.999172	1.11756	1.155	1.34752	1.4964	1.71831	1.63246	1.21349	0.993179	0.904632	0.899514	1.01658	1.12307	1.52586	2.35459
	12	0.871059	1.06557	1.07648	1.38186	1.49177	1.69849	1.76927	1.38912	1.12677	0.971623	0.908677	0.936898	1.04882	1.43631	2.20608
	13	0.733928	1.07964	1.23167	1.3607	1.49032	1.63502	1.65745	1.33668	1.13916	1.07893	0.959634	0.958231	1.09928
	14		1.08565	1.39848	1.40656	1.52916	1.63236	1.49578	1.17291	1.12292	1.25214	1.1472	1.20123	1.36138
	15			1.55733	1.59601	1.82129	1.78675	1.31699	1.02511	1.0525	1.42702	1.61846	1.88708	1.95747
	16				1.54634	1.74217	1.72805	1.19906	0.926948	0.934382	1.16194	1.31972	1.52742	1.80094
	17					1.3859	1.42918	0.950486	0.781454	0.783689	0.974125	0.952059	1.21031	1.4197
2	1					1.26266	1.08391	0.997246	0.941194	0.883985	1.02951	1.25925	1.51405	1.91446					2																		2
	2				1.07682	1.32579	1.16846	0.977445	0.855329	0.807689	0.860619	1.06572	1.32046	1.70135
	3			0.840866	0.958182	1.11889	1.07252	0.863363	0.736332	0.710538	0.77298	0.955096	1.23205	1.45844
	4		0.878035	0.886013	0.857294	0.854563	0.901426	0.800122	0.66304	0.590572	0.691176	0.809701	0.946472	1.01616
	5	0.826884	0.874319	0.836015	0.769835	0.820509	0.874664	0.785207	0.650559	0.616962	0.668185	0.7291	0.785177	0.9184
	6	0.893477	0.948463	0.862305	0.817354	0.772865	0.81194	0.734522	0.660023	0.626059	0.603012	0.660286	0.718086	0.84179	1.16899	1.63274
	7	1.05302	1.00085	0.946512	0.856786	0.77917	0.759655	0.717427	0.666279	0.644231	0.627083	0.699198	0.775765	0.853544	1.07896	1.52151
	8	1.05902	1.07654	1.013	0.93526	0.913492	0.837692	0.719898	0.694389	0.615818	0.627369	0.707883	0.819697	0.902813	1.1617	1.70696
	9	1.15794	1.13674	1.08569		1.03415	1.03221	0.811393	0.729515	0.676392	0.731681	0.760812	0.863151	0.971805	1.31357	1.79056
	10	1.05312	1.20614	1.26977	1.34465	1.31317	1.19314	1.00782	0.918641	0.802175	0.802225	0.840657	0.942456	1.10411	1.4733	2.15057
	11	0.874502	1.02473	1.12428	1.42466	1.44889	1.51411	1.49141	1.13833	0.983865	0.906397	0.918412	1.03617	1.17478	1.61174	2.26706
	12	0.812504	0.936715	1.07283	1.27639	1.39888	1.48835	1.59639	1.29868	1.10994	0.971076	0.940909	0.991091	1.09389	1.53556	2.21306
	13	0.81955	1.14382	1.20881	1.3951	1.34438	1.48202	1.5358	1.29031	1.12544	1.07132	0.978814	1.02014	1.17509
	14		1.0657	1.30025	1.41364	1.58625	1.63877	1.43238	1.15463	1.11836	1.28646	1.14724	1.30114	1.42339
	15			1.53351	1.45906	1.7751	1.65826	1.26686	0.991289	1.02969	1.38811	1.47586	1.76947	1.83725
	16				1.53556	1.72079	1.65634	1.19862	0.907857	0.949011	1.26968	1.22414	1.4465	1.65934
	17					1.30674	1.44996	0.977762	0.784317	0.813134	1.06959	0.952829	1.168	1.31449
3	1					1.31284	1.26287	1.19757	1.07998	1.03373	1.19254	1.31076	1.53942	1.90829					3																		3
	2				1.00543	1.23753	1.19307	1.04048	0.924086	0.963403	0.974078	1.11277	1.38002	1.64383
	3			0.768247	0.863067	1.0517	0.949851	0.839343	0.73177	0.759288	0.824254	1.00065	1.20403	1.49685
	4		0.724514	0.754599	0.773661	0.82364	0.83446	0.748612	0.655865	0.648745	0.703088	0.859859	0.979774	1.17488
	5	0.683673	0.749127	0.748038	0.735981	0.766676	0.784756	0.739623	0.655001	0.604938	0.695873	0.770435	0.862016	0.896364
	6	0.817799	0.832665	0.798037	0.730093	0.750794	0.767172	0.6888	0.608507	0.589491	0.596546	0.649351	0.703894	0.791307	1.13959	1.49567
	7	0.912058	0.994196	0.909972	0.802678	0.753503	0.728657	0.666992	0.615435	0.605447	0.568736	0.657872	0.73076	0.804328	1.06227	1.47054
	8	1.07267	1.03426	1.03932	0.946099	0.884164	0.82494	0.689515	0.644683	0.560401	0.602619	0.687807	0.821037	0.891151	1.1465	1.64608
	9	1.12614	1.09423	1.13543		0.917413	0.967399	0.788639	0.653476	0.617523	0.685893	0.706629	0.82517	0.971383	1.25079	1.82123
	10	1.06613	1.2114	1.1483	1.11932	1.16744	1.15848	0.879115	0.78404	0.759249	0.762828	0.801052	0.893338	1.05958	1.3696	2.15235
	11	0.901174	1.03765	1.06186	1.17712	1.21804	1.43415	1.43698	1.10831	0.932931	0.852847	0.86225	0.958338	1.08232	1.49024	2.21443
	12	0.850592	0.981171	1.10742	1.20962	1.1782	1.32628	1.49172	1.29682	1.08253	0.911536	0.870449	0.897186	1.00929	1.36702	2.12188
	13	0.796892	1.0567	1.14281	1.13102	1.18273	1.32314	1.4314	1.23308	1.08504	1.0021	0.9231	0.91321	1.09388
	14		1.10956	1.3135	1.21547	1.28203	1.37215	1.24807	1.08507	1.06959	1.17626	1.12322	1.11062	1.26066
	15			1.43714	1.37557	1.55981	1.42093	1.14415	0.968715	1.00633	1.36667	1.42963	1.8138	1.98567
	16				1.42033	1.4892	1.37822	1.04297	0.860531	0.915605	1.1902	1.17833	1.45002	1.74749
	17					1.19528	1.2607	0.896176	0.734701	0.750779	0.990916	0.958231	1.25789	1.43476
4	1					1.45579	1.25397	1.13632	1.06696	0.980747	1.14683	1.33963	1.54343	1.90799					4																		4
	2				1.15871	1.27358	1.17769	1.00417	0.856232	0.809839	0.94111	1.1153	1.39973	1.76038
	3			0.831091	0.916092	1.03494	0.903554	0.800964	0.724504	0.69865	0.787739	1.0835	1.32526	1.63817
	4		0.794612	0.853865	0.815562	0.827586	0.836879	0.730242	0.656831	0.603463	0.669986	0.883763	1.1369	1.31779
	5	0.74041	0.850584	0.790283	0.760611	0.783015	0.800407	0.742143	0.69723	0.62009	0.664776	0.802133	0.948688	1.11456
	6	0.823949	0.928047	0.815383	0.752639	0.731585	0.78455	0.730725	0.64751	0.6261	0.635145	0.739553	0.807169	0.929053	1.21634	1.77284
	7	1.02913	0.984331	0.88573	0.798107	0.760637	0.782579	0.718795	0.668713	0.638786	0.634247	0.688411	0.765128	0.830873	1.1094	1.59437
	8	1.14885	1.03524	0.961646	0.935587	0.93466	0.890061	0.746935	0.666448	0.621774	0.635464	0.71546	0.822409	0.888657	1.14259	1.67555
	9	1.21091	1.21711	1.15958		1.12564	1.13482	0.866876	0.73885	0.684447	0.758378	0.757254	0.862503	0.977912	1.34276	1.89134
	10	0.983404	1.09505	1.19916	1.17846	1.29729	1.29511	1.13103	0.924653	0.826787	0.813771	0.858503	0.994473	1.12745	1.56187	2.35538
	11	0.848894	1.05855	1.0813	1.20525	1.4421	1.57008	1.56437	1.19532	0.992143	0.900085	0.911381	1.06203	1.1809	1.62692	2.44328
	12	0.793431	0.884803	1.02295	1.25443	1.32086	1.50788	1.64634	1.30793	1.09871	0.944826	0.928308	0.984418	1.13961	1.5163	2.19845
	13	0.80628	1.06631	1.21241	1.33983	1.42052	1.49733	1.57908	1.28956	1.13023	1.05426	0.975538	0.982479	1.11824
	14		1.07466	1.32599	1.40014	1.53081	1.57029	1.37148	1.1682	1.10353	1.23138	1.17297	1.20941	1.33852
	15			1.40505	1.44577	1.59811	1.60354	1.23914	0.980498	0.985591	1.32049	1.40933	1.82694	2.03327
	16				1.50614	1.57389	1.58244	1.13338	0.879644	0.885803	1.18827	1.16721	1.48432	1.83472
	17					1.29552	1.39562	0.983442	0.778961	0.749381	1.00563	0.903772	1.26044	1.46892
5	1					1.54991	1.36443	1.26323	1.10265	1.02535	1.09056	1.25314	1.54287	1.81001					5																		5
	2				1.18812	1.36357	1.27664	1.01747	1.00425	0.883497	0.958398	1.12476	1.25532	1.51476
	3			0.849213	0.914961	1.0569	0.931952	0.858194	0.744313	0.754486	0.807286	1.05366	1.23425	1.43203
	4		0.807468	0.855174	0.833642	0.870993	0.909832	0.799229	0.67433	0.665968	0.713197	0.863173	1.02594	1.22654
	5	0.753458	0.824105	0.792332	0.747217	0.827074	0.89005	0.770396	0.677858	0.62247	0.653494	0.784035	0.900685	1.03952
	6	0.811084	0.810849	0.775816	0.742483	0.773342	0.82364	0.771347	0.67745	0.612379	0.65699	0.70066	0.738899	0.829247	1.15444	1.5376
	7	0.949621	0.964414	0.862973	0.750663	0.78414	0.719035	0.658055	0.652963	0.617349	0.595202	0.694045	0.780407	0.84985	1.10054	1.53177
	8	1.01996	0.955406	0.975584	0.898125	0.826023	0.765816	0.655781	0.643331	0.563999	0.605049	0.703324	0.844938	0.921063	1.14175	1.64213
	9	1.15944	1.13361	1.14704		0.996303	0.962132	0.785991	0.643622	0.631077	0.733351	0.755215	0.879011	1.00158	1.2519	1.73314
	10	0.992578	1.25549	1.1979	1.27562	1.22432	1.14848	0.936807	0.83598	0.820684	0.788876	0.870277	0.987754	1.10082	1.41536	2.10785
	11	0.875582	1.10572	1.15036	1.41769	1.52239	1.59512	1.47409	1.16995	1.00601	0.921478	0.945581	1.0522	1.12335	1.58182	2.29367
	12	0.854824	0.944825	1.10924	1.36167	1.49198	1.65468	1.72338	1.41144	1.12172	0.972688	0.941538	1.01208	1.1059	1.50232	2.30345
	13	0.769762	1.0742	1.21167	1.44451	1.51541	1.683	1.60682	1.36539	1.1441	1.0874	1.00985	1.00936	1.19078
	14		1.03637	1.38121	1.44787	1.66711	1.78593	1.45403	1.18966	1.13897	1.24067	1.2102	1.26602	1.41694
	15			1.66892	1.60594	1.772	1.74834	1.34151	1.05338	1.10295	1.46657	1.53718	1.8127	1.92476
	16				1.55896	1.75611	1.70287	1.23569	0.959812	0.9847	1.31151	1.27582	1.55044	1.73586
	17					1.41875	1.46829	0.994297	0.795505	0.791064	1.02349	0.958836	1.25924	1.40648
6	1					1.34595	1.17225	1.08583	0.983103	0.990397	1.05573	1.28177	1.5423	1.93707					6																		6
	2				1.07411	1.24508	1.11912	0.970677	0.881207	0.908729	0.862636	1.07258	1.33494	1.55586
	3			0.864861	0.926942	1.00671	0.959817	0.828499	0.732977	0.75923	0.761936	0.955081	1.21606	1.45867
	4		0.85287	0.895728	0.802766	0.851605	0.846509	0.743952	0.686276	0.642824	0.688124	0.808645	0.952506	1.18336
	5	0.761647	0.87988	0.857358	0.761857	0.766459	0.812497	0.758079	0.67812	0.591623	0.671952	0.762309	0.836901	0.981159
	6	0.882767	0.983765	0.873636	0.824184	0.743058	0.770404	0.755404	0.705715	0.614182	0.628467	0.695096	0.724733	0.840371	1.14718	1.60319
	7	1.0495	1.11683	0.953952	0.839587	0.74957	0.779565	0.669045	0.680686	0.585928	0.609934	0.661157	0.769838	0.819518	1.1268	1.5181
	8	1.09599	1.07292	1.0226	0.858839	0.837032	0.764119	0.658695	0.658409	0.56836	0.597011	0.671687	0.811324	0.881248	1.18388	1.62098
	9	0.988952	1.10552	1.07041		0.97497	0.910528	0.805616	0.696367	0.650722	0.670217	0.749003	0.841635	0.959291	1.24352	1.8618
	10	0.912831	1.08864	1.02165	1.07609	1.09386	1.07118	0.906982	0.832814	0.76167	0.763811	0.829464	0.949967	1.09756	1.44764	2.24211
	11	0.831281	0.959971	1.02735	1.11021	1.23525	1.37639	1.37309	1.13041	0.929316	0.863662	0.900743	1.04415	1.11833	1.58694	2.37534
	12	0.835986	0.87124	1.03881	1.24762	1.3033	1.50692	1.62769	1.3164	1.07064	0.937684	0.912234	0.962762	1.09576	1.47286	2.29318
	13	0.823799	1.04483	1.1571	1.31884	1.32735	1.44842	1.51458	1.32745	1.09798	1.02584	0.953935	0.973269	1.12288
	14		1.0274	1.30478	1.43481	1.51054	1.53291	1.32108	1.15103	1.04745	1.17045	1.1446	1.21665	1.37055
	15			1.51051	1.68804	1.76416	1.5489	1.18661	1.0225	0.991197	1.31348	1.47881	1.83954	2.00655
	16				1.72148	1.82302	1.53021	1.11651	0.918348	0.884466	1.2295	1.2759	1.52958	1.80872
	17					1.40897	1.36808	0.940667	0.771363	0.745214	1.01602	1.00463	1.27924	1.49434
7	1					1.30231	1.29765	1.13438	1.02615	0.999766	1.12765	1.35876	1.54282	2.00085					7																		7
	2				1.13058	1.28979	1.31063	1.01626	0.928957	0.889864	0.967186	1.16046	1.31523	1.72369
	3			0.790126	0.986126	1.04235	1.03576	0.913407	0.741003	0.777722	0.818171	1.02234	1.26855	1.46159
	4		0.781878	0.806333	0.838452	0.870075	0.894882	0.830003	0.691131	0.653873	0.707349	0.845382	0.988413	1.26776
	5	0.683269	0.793384	0.751595	0.761926	0.785456	0.829901	0.762739	0.694307	0.646003	0.673706	0.746746	0.841016	1.03358
	6	0.862832	0.897382	0.803446	0.794051	0.824498	0.791462	0.741579	0.633621	0.608405	0.625806	0.681946	0.725508	0.850783	1.13047	1.52499
	7	0.95147	0.928491	0.907938	0.822592	0.809008	0.800749	0.695387	0.663729	0.610017	0.629415	0.688262	0.743376	0.818896	1.08314	1.45559
	8	1.02144	1.05216	0.986586	0.910053	0.904856	0.790646	0.690442	0.646926	0.586706	0.648848	0.734608	0.860564	0.918533	1.18401	1.63464
	9	1.06	1.03653	1.09592		1.0339	0.965412	0.806615	0.684132	0.677636	0.754155	0.830118	0.958068	1.03586	1.29477	1.78663
	10	0.951807	1.119	1.19319	1.21291	1.2488	1.20537	1.03477	0.880134	0.826565	0.837938	0.894368	1.03813	1.19918	1.46205	2.12622
	11	0.903995	0.986572	0.96973	1.29737	1.4819	1.50128	1.43712	1.17693	1.01861	0.982684	0.997608	1.09733	1.23033	1.59336	2.23049
	12	0.809962	0.936338	1.03234	1.34775	1.59229	1.63681	1.68689	1.38754	1.15018	1.04871	1.00722	1.04091	1.13739	1.44507	2.04364
	13	0.768573	1.08861	1.25854	1.43547	1.56518	1.68364	1.51972	1.39758	1.17617	1.1263	1.00678	1.02633	1.18603
	14		1.11072	1.35607	1.47567	1.6792	1.62378	1.35879	1.19863	1.16036	1.32428	1.15773	1.26403	1.39199
	15			1.40249	1.63101	1.86134	1.65287	1.25735	1.07569	1.11388	1.56267	1.52341	1.83761	1.87996
	16				1.65066	1.98535	1.60046	1.17947	0.982979	1.01401	1.36792	1.29396	1.57853	1.83295
	17					1.4728	1.43299	1.0113	0.82501	0.791389	1.05927	0.973996	1.25422	1.34794
8	1					1.32307	1.17557	1.07952	1.07637	0.947813	1.08846	1.2591	1.46139	1.89633					8																		8
	2				1.10681	1.23629	1.14863	0.974762	0.907076	0.881588	0.9629	1.14553	1.38646	1.64603
	3			0.857303	0.844826	1.01322	0.95802	0.894135	0.770625	0.777511	0.869039	1.0738	1.32903	1.56301
	4		0.82947	0.787859	0.788582	0.795332	0.794284	0.750457	0.653124	0.643587	0.738942	0.874181	1.0044	1.20278
	5	0.708949	0.84056	0.797211	0.761146	0.737048	0.788161	0.745024	0.682128	0.600866	0.71482	0.769578	0.834533	0.954484
	6	0.828426	0.936912	0.841874	0.755005	0.725493	0.784465	0.728897	0.654555	0.598716	0.635154	0.697239	0.755134	0.839295	1.12996	1.69331
	7	0.93591	0.982499	0.920698	0.822224	0.793463	0.755519	0.715705	0.700131	0.643627	0.610971	0.662027	0.752573	0.804257	1.12667	1.59826
	8	1.05353	0.98263	0.938901	0.895549	0.849541	0.815004	0.721491	0.653158	0.568045	0.610426	0.692049	0.838195	0.913954	1.12626	1.68863
	9	1.05817	1.08334	1.01556		0.965675	0.987267	0.802432	0.689662	0.652305	0.737283	0.761826	0.87826	0.974595	1.26036	1.80565
	10	0.825343	1.0524	1.1189	1.24416	1.23532	1.23373	0.999864	0.858045	0.802315	0.823517	0.830918	0.945443	1.0583	1.42792	2.12571
	11	0.786322	0.990852	1.08823	1.3265	1.4737	1.54844	1.43134	1.10948	0.934786	0.89446	0.900997	1.01288	1.13074	1.56139	2.38235
	12	0.8417	0.95986	1.02164	1.24642	1.33652	1.51534	1.51323	1.24848	1.04488	0.951226	0.930576	0.961398	1.07525	1.45223	2.28364
	13	0.746164	0.960545	1.1499	1.32685	1.36811	1.49621	1.43465	1.27893	1.0662	1.03575	0.9787	1.00578	1.1409
	14		0.990259	1.24004	1.37418	1.53853	1.45516	1.22838	1.12938	1.05786	1.15493	1.14458	1.22904	1.49084
	15			1.33626	1.40389	1.60371	1.33098	1.10681	0.954723	0.992787	1.29327	1.44863	1.82206	2.00426
	16				1.5051	1.57476	1.31878	1.02352	0.865885	0.918011	1.16444	1.26593	1.60394	1.84767
	17					1.30701	1.21232	0.930339	0.779122	0.785184	0.988767	1.05264	1.36369	1.43041
9	1					1.24475	1.13844	1.14391	1.00015	1.00239	1.04545	1.31773	1.51281	1.89946					9																		9
	2				1.10686	1.21383	1.18317	0.975474	0.858935	0.821043	0.893664	1.10674	1.28822	1.614
	3			0.805187	0.908161	1.04118	0.958455	0.834345	0.661326	0.688218	0.786999	1.03056	1.2148	1.4711
	4		0.860158	0.83676	0.859422	0.913904	0.861438	0.730094	0.638545	0.618481	0.708536	0.880006	1.03658	1.21534
	5	0.739129	0.915951	0.86984	0.863819	0.817661	0.848993	0.75211	0.658686	0.591849	0.654772	0.772792	0.885141	1.00754
	6	0.814196	0.927526	0.906654	0.831184	0.807661	0.868637	0.772205	0.706823	0.615272	0.654991	0.699439	0.748378	0.843018	1.123	1.66081
	7	0.924995	1.00989	0.947655	0.897762	0.806056	0.817375	0.762625	0.729856	0.650777	0.66842	0.696336	0.750355	0.788814	1.10297	1.57793
	8	0.98587	1.02626	1.0599	0.960431	0.870275	0.841998	0.752335	0.700983	0.619027	0.680154	0.741189	0.801747	0.827351	1.08319	1.65567
	9	1.05115	1.09507	1.12137		1.09815	1.04938	0.797743	0.715614	0.693673	0.756166	0.758308	0.823703	0.904341	1.20968	1.79416
	10	0.980684	1.10768	1.17231	1.22275	1.36531	1.26923	1.08918	0.879947	0.863377	0.841612	0.86292	0.932851	1.02727	1.35851	2.02961
	11	0.873656	1.04813	1.09631	1.21008	1.46715	1.63036	1.52141	1.14359	0.980463	0.928583	0.950244	0.99533	1.06984	1.48584	2.14312
	12	0.841532	0.921984	1.04797	1.21208	1.40849	1.62506	1.68669	1.33046	1.0958	0.987898	0.962993	0.978001	1.03221	1.44587	2.08991
	13	0.816121	1.03604	1.12755	1.25529	1.4496	1.60229	1.59817	1.32533	1.14379	1.0918	1.023	0.989784	1.12248
	14		0.986425	1.27132	1.41923	1.54543	1.76529	1.47451	1.14176	1.11249	1.30187	1.15947	1.14064	1.34489
	15			1.5276	1.51181	1.72927	1.71551	1.2633	0.982682	1.0832	1.48209	1.37587	1.70797	1.65194
	16				1.46744	1.63389	1.6371	1.17416	0.895628	0.951278	1.38988	1.19831	1.41246	1.57143
	17					1.26674	1.36247	0.974621	0.780542	0.782279	1.06137	0.952395	1.11409	1.26334
10	1					1.18504	1.04786	0.96634	0.831112	0.858491	0.971009	1.24957	1.49788	1.75253					10																		10
1.04699	2				0.968785	1.18123	1.07224	0.884666	0.759969	0.800394	0.893682	1.10053	1.3197	1.59887
0.313828	3			0.785256	0.866588	0.99249	0.858091	0.811731	0.642495	0.704924	0.762356	1.04333	1.25949	1.44184
	4		0.764202	0.839675	0.792583	0.80246	0.831723	0.757977	0.594876	0.5915	0.669581	0.838372	0.978191	1.1086
	5	0.747454	0.81141	0.813781	0.813915	0.804399	0.797949	0.744643	0.613675	0.592014	0.687857	0.769522	0.862333	0.981083
	6	0.836986	0.869935	0.869901	0.844189	0.783664	0.7789	0.737934	0.595355	0.572951	0.603339	0.674796	0.710784	0.794421	1.06521	1.68561
	7	1.0362	0.946705	0.907034	0.847348	0.783204	0.782736	0.694632	0.630149	0.572544	0.614336	0.689687	0.752983	0.792423	1.05331	1.4896
	8	1.10615	1.00804	1.04177	0.968764	0.863425	0.827647	0.691722	0.661264	0.572124	0.605334	0.694846	0.843496	0.809636	1.07972	1.60463
	9	1.13435	1.07272	1.06045		1.02033	1.02623	0.826981	0.762002	0.617704	0.708998	0.740974	0.83028	0.890686	1.11618	1.73494
	10	0.948846	1.0751	1.0361	1.08446	1.17185	1.22233	1.00078	0.817519	0.750334	0.785487	0.83402	0.899098	0.999705	1.26364	1.90376
	11	0.845806	1.05765	1.11758	1.27804	1.4733	1.4915	1.47686	1.043	0.916931	0.881519	0.897599	0.954713	1.02859	1.37551	1.97048
	12	0.857934	0.973158	1.02725	1.27528	1.37137	1.57334	1.67423	1.269	1.04018	0.937419	0.932152	0.958865	1.01436	1.33374	1.94049
	13	0.858632	1.10008	1.19953	1.31209	1.34447	1.47073	1.56235	1.25651	1.0682	1.03199	0.980227	0.967996	1.11476
	14		1.11179	1.27715	1.3556	1.42996	1.54952	1.33196	1.11356	1.0511	1.22091	1.16033	1.24046	1.34989
	15			1.46622	1.39436	1.68006	1.52839	1.18925	0.977439	1.02138	1.43794	1.49252	1.80715	1.99156
	16				1.43095	1.57177	1.59698	1.10162	0.875716	0.905836	1.23978	1.26407	1.52431	1.70464
	17					1.32203	1.41929	0.932673	0.755421	0.763789	1.01664	0.955857	1.30895	1.48152

## Sheet: Pref
Preferentiality
Signals of insufficient quality were excluded from the property maps. Signals could be rejected based on noise low amplitude, large artefact or ventricluar farfields that could not be substracted.
		1	2	3	4	5	6	7	8	9	10	11	12	13	14	15	16	17
1	1					2.92444	0.132785	0.0250793	2.83607	2.6983	2.55753	2.58631	2.19447	2.05714					1																		1
	2				0.485631	0.712397	0.18949	3.1283	2.79202	2.58555	2.48023	2.39164	1.95581	1.79844
	3			0.835529	0.758614	1.11441	2.46252	2.89383	2.79035	2.57123	2.43006	2.3819	2.18378	1.80343
	4		0.722452	0.818767	1.23794	1.6795	1.83483	2.5601	2.80683	2.52797	2.40713	2.27801	2.05819	1.65617
	5	0.406568	3.10244	2.54249	2.39983	1.94712	1.8851	2.44465	2.85171	2.72716	2.42331	2.27817	2.0902	1.78846
	6	0.155484	2.96417	2.61925	2.7523	2.49416	2.07819	2.08852	2.80746	2.57394	2.05452	1.92949	1.94473	1.76964	1.40906	1.18358
	7	0.0577609	3.08652	0.0478744	0.181923	1.15197	1.62324	1.82277	2.4315	1.87929	1.93205	1.87289	1.8891	1.87342	1.57149	1.31948
	8	0.281271	0.442358	0.616393	0.757224	1.0219	1.23355	1.47379	2.05756	2.01637	2.02103	1.98875	2.0322	2.07655	1.80566	1.61077
	9	0.256645	0.661353	0.650564		0.978428	1.18528	1.61707	2.06221	2.13968	2.14503	2.16566	2.22489	2.30938	2.19562	2.00635
	10	2.74178	1.9186	1.3195	0.840577	0.845019	1.07911	1.74514	2.27038	2.36882	2.37307	2.44915	2.50306	2.60776	2.52194	2.32638
	11	3.02066	2.37834	2.1276	1.12322	0.948005	1.23492	1.5107	2.60639	2.70398	2.72309	2.7352	2.72767	2.84242	2.7234	2.47268
	12	2.94359	2.99987	1.1493	1.55662	1.57582	1.68923	1.63177	2.90275	2.93443	2.92989	2.90597	2.87161	2.95578	2.84143	2.40177
	13	2.89681	3.05451	0.362393	1.39739	1.74371	2.00691	1.97223	0.284123	0.133961	3.13841	2.97788	2.89191	2.75723
	14		2.99005	3.09526	2.77462	2.01186	2.13175	2.11107	0.807007	0.45883	0.33955	0.183757	0.0251905	2.9003
	15			2.98601	2.65449	2.35525	2.24962	1.90707	0.796811	0.719547	0.703437	0.677815	0.55725	0.468934
	16				2.5781	2.25773	2.1555	0.972418	0.921215	0.910575	0.965597	0.895329	0.744311	0.522195
	17					2.0382	1.63707	1.16382	1.03006	1.0017	1.07828	1.29948	1.05577	0.389143
2	1					0.634309	0.384798	0.137646	3.01708	2.93993	2.74755	2.74904	2.22652	1.77266					2																		2
	2				0.516319	0.595856	0.114483	3.13382	2.87475	2.68039	2.53279	2.2982	1.92754	1.65235
	3			0.791988	0.885493	1.64629	2.40267	2.90793	2.82734	2.62492	2.50596	2.37436	2.12809	1.90136
	4		0.645771	0.727899	1.66692	1.98415	2.15134	2.65911	2.82666	2.58435	2.45001	2.37021	2.16735	1.81098
	5	0.390238	0.893742	2.5674	2.49009	2.23782	2.23949	2.77857	2.95658	2.77377	2.53172	2.41678	2.19007	1.81091
	6	0.144009	0.0245589	2.95031	2.9362	2.74948	2.45565	2.84326	3.13965	3.05864	2.39311	2.12515	2.03178	1.79932	1.43902	1.23773
	7	0.0636133	0.266671	0.354831	0.185273	0.108997	0.39376	2.89346	0.0939196	2.91808	1.99036	1.86338	1.89787	1.86076	1.67389	1.36959
	8	0.374229	0.62545	0.683464	0.680423	0.784482	0.841454	1.09306	2.17112	2.09429	2.07236	1.98188	2.07696	2.07867	1.80535	1.58841
	9	0.636638	1.04172	0.809823		0.800691	0.980608	1.4362	2.13398	2.18317	2.15801	2.16521	2.26241	2.33521	2.21395	2.02912
	10	1.98407	1.19241	1.09113	0.823104	0.830321	0.957509	1.62727	2.29033	2.40558	2.42297	2.45365	2.51734	2.63277	2.55804	2.35699
	11	3.12124	0.956027	1.11973	0.971643	0.891483	0.933289	0.821687	2.68811	2.75545	2.76084	2.76028	2.75447	2.8827	2.78584	2.49661
	12	0.183189	0.792742	0.938892	1.08841	1.34218	1.49539	1.46121	3.04084	3.01457	2.97461	2.94092	2.91115	2.97618	2.85406	2.3941
	13	3.01365	0.293731	0.590119	0.324514	1.20466	1.95489	1.9044	0.531848	0.177016	0.00769115	2.9674	2.90617	2.79077
	14		0.0882069	0.212695	0.0149286	2.5916	2.23077	2.10985	0.687739	0.437336	0.304903	0.198844	3.12215	2.73449
	15			0.0916133	2.93261	2.44372	2.3863	0.850869	0.763221	0.70049	0.696181	0.714466	0.587357	0.414812
	16				2.8789	2.27475	2.24813	0.899842	0.877546	0.868152	0.940209	0.896645	0.867158	0.557164
	17					1.99364	1.45517	1.134	0.990461	0.981092	1.06556	1.28992	1.18505	0.392534
3	1					0.221648	0.239163	0.0582075	3.0502	2.84549	2.92782	3.02018	2.95471	1.42077					3																		3
	2				0.626854	0.712961	0.209423	3.05678	2.79053	2.58842	2.67013	2.62601	1.68445	1.61498
	3			0.763229	0.73454	1.21692	2.11944	2.61949	2.63417	2.50836	2.44141	2.33595	1.85565	1.6811
	4		0.709609	0.701557	1.21215	1.6002	1.80114	2.36365	2.54885	2.45633	2.32118	2.28459	1.97617	1.57623
	5	0.530765	0.756867	0.158509	2.98425	1.59143	1.89739	2.2074	2.56155	2.423	2.32387	2.21217	1.97184	1.65271
	6	0.248032	0.341799	0.138605	3.08388	2.18021	1.82697	1.95495	2.06174	2.13739	1.96987	1.91591	1.91651	1.74502	1.40163	1.1976
	7	0.231066	0.306026	0.224174	0.338986	0.628334	1.46825	1.60529	1.86007	1.81095	1.8991	1.85312	1.85898	1.79683	1.54477	1.32226
	8	0.43735	0.532257	0.575588	0.609999	0.786487	1.22584	1.58996	1.89491	1.94739	1.9952	1.93815	1.99599	2.02073	1.73189	1.52765
	9	0.419696	0.571706	0.662324		0.845634	1.15402	1.56717	1.99036	2.05928	2.04893	2.12423	2.18979	2.2782	2.1411	1.95995
	10	0.139156	0.606341	0.65762	0.713013	0.781985	0.94325	1.64195	2.14274	2.29526	2.36568	2.42645	2.4893	2.60859	2.5103	2.31419
	11	0.117663	0.454788	2.99617	0.7004	0.658022	0.933718	0.89122	2.62618	2.67555	2.7169	2.72169	2.71206	2.85582	2.75118	2.48406
	12	0.0301133	0.322306	0.106687	0.411629	1.26846	1.6551	1.53623	3.05269	2.99416	2.96355	2.91269	2.89047	2.94408	2.84313	2.41675
	13	2.84357	0.748246	0.535074	0.390997	1.84062	1.98041	1.83664	0.923566	0.239218	0.0578393	2.98438	2.91496	2.84186
	14		3.05349	0.0684937	3.00931	2.3093	2.16376	1.99795	1.16385	0.532933	0.369451	0.238487	0.0266051	3.03034
	15			3.00051	2.67383	2.27828	2.33317	1.97171	0.946546	0.756319	0.717157	0.691788	0.612778	0.467916
	16				2.61524	2.23779	2.24317	1.42094	1.0288	0.934602	0.964809	0.924636	0.859065	0.572374
	17					2.09444	1.78581	1.31235	1.09941	1.01882	1.08452	1.23224	1.11974	0.410161
4	1					0.0116763	0.0652092	0.0116361	2.8423	2.81601	2.86023	2.73165	2.15684	1.86929					4																		4
	2				0.591485	0.763114	3.06111	2.96571	2.78184	2.6297	2.55567	2.45034	1.91619	1.69341
	3			0.864877	1.11199	1.8176	2.34837	2.7822	2.7534	2.59521	2.48736	2.37939	2.23519	2.00506
	4		0.808615	0.88378	1.77796	1.91935	2.05624	2.64878	2.76034	2.58321	2.45443	2.30869	2.1836	1.91624
	5	0.433703	2.51131	2.5732	2.55702	2.20904	2.16561	2.65209	2.86217	2.76185	2.49153	2.39074	2.1984	1.81435
	6	0.138199	3.02566	2.74825	2.83353	2.58007	2.3965	2.70342	2.96675	2.84574	2.36936	2.13867	2.13597	1.94678	1.59082	1.24733
	7	0.128483	0.0838779	0.053589	3.1123	2.95312	2.72967	2.95854	2.99201	2.71247	2.16456	1.99524	2.00098	1.86767	1.63909	1.36722
	8	0.275141	0.440931	0.427638	0.351089	0.504964	1.04576	1.16553	2.40639	2.16953	2.16198	2.05113	2.07771	2.05904	1.78294	1.60359
	9	0.744456	0.892924	0.810116		0.692916	0.889462	1.48709	2.21549	2.24681	2.23918	2.21785	2.26151	2.32612	2.16803	2.00195
	10	0.319688	1.36896	1.03335	0.725188	0.721774	0.843454	1.50577	2.38097	2.43492	2.4399	2.47376	2.53714	2.64048	2.53135	2.34785
	11	2.99462	2.27137	1.92537	0.781764	0.85859	0.974144	0.734827	2.71393	2.75458	2.74587	2.74149	2.73601	2.87665	2.75163	2.49201
	12	3.03794	3.10763	0.742157	0.727323	1.33924	1.5162	1.41634	3.04336	2.99169	2.9663	2.91811	2.88565	2.95603	2.81028	2.37162
	13	3.06018	0.173299	0.0635736	0.140577	1.7033	1.91221	1.85013	0.661546	0.203589	0.0336186	2.97356	2.89417	2.76463
	14		0.0337729	0.223335	3.05108	2.07501	2.10578	2.01296	0.831609	0.502048	0.367831	0.264253	0.025047	2.90403
	15			3.12073	2.6856	2.2814	2.20056	1.45261	0.858784	0.75671	0.728969	0.694452	0.584259	0.365071
	16				2.58261	2.24554	2.11335	1.12013	0.947992	0.918103	0.959302	0.932385	0.767322	0.44437
	17					2.00385	1.63024	1.15749	1.01465	1.00598	1.07844	1.28379	1.15203	0.288675
5	1					0.279203	0.34885	3.10296	2.80937	2.70303	2.62653	2.62762	1.72401	1.32189					5																		5
	2				0.63357	0.766147	0.461464	3.05467	2.72824	2.50918	2.43745	2.06846	1.73939	1.54818
	3			0.702427	0.827099	1.26631	2.1705	2.61895	2.6165	2.54672	2.45724	2.29662	1.90521	1.64768
	4		0.489329	0.483397	1.34283	1.59169	1.84574	2.50069	2.6358	2.49772	2.38843	2.29613	2.07612	1.71147
	5	0.407625	0.334633	3.00783	0.800083	1.79416	1.92345	2.47356	2.76031	2.63594	2.42192	2.31673	2.11926	1.74115
	6	0.283745	0.393643	0.110358	0.30203	1.74593	1.79519	2.30153	2.70724	2.57101	2.03339	1.93237	2.00932	1.85419	1.50542	1.17408
	7	0.243222	0.530499	0.639908	0.60653	0.951646	1.30119	1.7713	2.45482	2.11775	1.9379	1.87918	1.9307	1.84086	1.60792	1.34802
	8	0.332072	0.48796	0.785725	0.837464	1.01946	1.24111	1.47584	1.93048	1.97931	1.98077	1.94484	2.06265	2.09718	1.7792	1.59116
	9	0.400905	0.716326	0.651586		0.927215	1.15669	1.51363	1.96051	2.06891	2.09999	2.14543	2.24252	2.32542	2.20224	2.0159
	10	3.10814	0.593465	0.569626	0.657079	0.799292	0.985984	1.65152	2.19327	2.32308	2.39475	2.44931	2.50302	2.61937	2.5251	2.33405
	11	3.06271	2.85511	0.00336794	0.226903	0.633571	0.998478	0.954765	2.63678	2.66797	2.70429	2.72459	2.72608	2.86097	2.74011	2.48148
	12	3.12292	3.03933	0.144513	0.168507	0.735078	1.52465	1.70989	2.9334	2.90173	2.9099	2.88139	2.87437	2.9718	2.86943	2.49315
	13	2.98467	0.371314	0.468189	0.230288	2.20277	2.02206	1.89864	0.593965	0.0852733	3.084	2.91718	2.86964	2.79972
	14		0.0723629	0.134049	2.98303	2.40044	2.13427	2.01169	1.08458	0.425173	0.280496	0.0623715	3.08002	2.83864
	15			3.07166	2.70778	2.31419	2.18792	1.49339	0.861318	0.732223	0.681176	0.668183	0.572768	0.368713
	16				2.62763	2.29464	2.17207	1.05574	0.940196	0.911929	0.958387	0.888782	0.745723	0.454608
	17					1.9862	1.55949	1.15344	1.03648	1.01636	1.10756	1.31794	1.18615	0.287771
6	1					0.117957	0.133005	0.144487	2.99649	2.8943	2.85175	2.90292	2.60757	2.16936					6																		6
	2				0.568443	0.59517	0.029911	3.03744	2.77803	2.64815	2.59554	2.43064	2.08584	1.75844
	3			0.937648	0.929452	1.54407	2.17786	2.64777	2.65445	2.58475	2.51947	2.46277	2.24915	1.87898
	4		0.720021	0.754142	1.82053	1.84175	1.98144	2.38848	2.59208	2.50001	2.39005	2.25892	2.14642	1.75289
	5	0.300812	1.92573	2.68774	2.51365	2.10324	2.01567	2.31862	2.67819	2.6146	2.37143	2.23186	2.12323	1.76364
	6	0.156195	0.186276	3.04007	2.9729	2.84725	2.26127	2.33356	2.76156	2.58245	2.08748	1.97071	2.02266	1.79875	1.48083	1.22343
	7	0.225193	0.476044	0.444127	0.339914	0.343326	0.929423	2.39542	2.0633	2.06106	1.95893	1.92902	1.90459	1.85398	1.65051	1.33
	8	0.456429	0.540442	0.739722	0.69601	0.819221	1.0128	1.24057	1.72261	1.95838	2.07544	2.02134	2.07326	2.07417	1.82208	1.58523
	9	0.305303	0.580918	0.895155		0.923419	1.03799	1.321	1.97671	2.11159	2.1872	2.19419	2.26086	2.32912	2.2077	2.01963
	10	0.0918581	3.03301	0.756736	0.736704	0.844858	1.02607	1.3858	2.17634	2.36814	2.44497	2.47642	2.53423	2.64898	2.57591	2.38448
	11	0.0113952	2.98424	0.000414235	0.501094	0.802697	0.877905	0.832766	2.64006	2.74056	2.78003	2.76946	2.74637	2.88437	2.77257	2.54542
	12	3.13651	3.09436	0.292121	0.478093	0.880592	1.22091	1.46762	3.00093	3.02308	3.00577	2.95409	2.92068	2.97761	2.85866	2.46948
	13	2.8908	0.256617	0.354702	0.836244	1.33342	1.73045	1.78612	0.472298	0.18026	0.0492489	3.03568	2.95058	2.8621
	14		3.11986	0.246687	0.496638	1.86051	2.11854	1.94391	0.726361	0.462631	0.351514	0.199965	0.0749124	3.00482
	15			0.0414316	3.02044	2.27885	2.36336	0.838864	0.798368	0.710954	0.673741	0.63737	0.59156	0.420848
	16				2.89023	2.17005	2.34234	0.869613	0.927435	0.877682	0.921139	0.935908	0.801954	0.513221
	17					1.88139	1.35947	1.07431	1.0182	0.98244	1.0528	1.2875	1.13317	0.268984
7	1					0.22036	0.19322	0.152594	3.02402	2.98712	3.04941	3.09431	3.03105	0.283977					7																		7
	2				0.508979	0.407499	0.0210315	3.07935	2.91598	2.76225	2.70591	2.5654	2.17519	1.60857
	3			0.757729	0.833762	1.83746	2.29321	2.76588	2.79848	2.59336	2.54389	2.40986	2.35016	2.03964
	4		0.649918	0.649646	1.38828	1.69571	1.89762	2.44696	2.72752	2.53086	2.44768	2.36478	2.162	1.85921
	5	0.362966	0.305763	3.01115	2.30249	1.8787	1.89537	2.43193	2.8507	2.61112	2.3083	2.35966	2.18266	1.85304
	6	0.120906	0.0464121	3.03868	2.84831	2.06069	1.93123	2.11717	0.599584	1.58768	1.84156	1.91812	1.98682	1.75448	1.3972	1.1554
	7	0.148515	0.265217	0.200967	0.272348	0.908405	1.32784	1.27264	1.04388	1.53133	1.81511	1.81777	1.86412	1.79304	1.5312	1.28844
	8	0.267681	0.469578	0.552888	0.732348	1.03269	1.08136	1.26283	1.54782	1.8715	1.92477	1.90246	2.03418	2.00611	1.71558	1.54887
	9	0.0858071	0.378973	0.682689		0.977721	1.02438	1.40572	1.94431	2.05691	2.09483	2.1303	2.21394	2.29196	2.1679	1.98472
	10	2.9745	2.88931	0.828672	0.7418	0.858766	1.05719	1.47671	2.14548	2.33079	2.40583	2.44646	2.49726	2.62253	2.53536	2.32056
	11	3.04102	2.13571	0.885294	0.828745	0.994917	1.10445	1.22456	2.55931	2.68916	2.71952	2.72997	2.72461	2.84768	2.73482	2.47309
	12	3.02657	0.312341	0.994908	1.12771	1.20337	1.47573	1.58775	2.79893	2.85858	2.86932	2.84827	2.83362	2.8888	2.77271	2.38766
	13	2.84065	0.3901	0.544636	1.03982	1.45771	1.87784	1.93904	2.89767	3.08491	2.97973	2.80935	2.75373	2.68695
	14		0.0337758	0.0832567	0.632303	1.68434	2.09663	2.19707	0.155851	0.308562	0.21083	3.12672	2.77663	2.68535
	15			3.13826	2.84208	2.00138	2.37715	0.145609	0.655986	0.650024	0.651671	0.64554	0.536267	0.480665
	16				2.8044	2.09538	2.61969	0.643187	0.833113	0.850449	0.950263	0.872219	0.747045	0.513119
	17					1.92022	1.11946	0.975322	0.958214	0.97253	1.09877	1.29445	1.16697	0.450277
8	1					0.400487	0.19443	0.087325	0.0998668	2.96312	2.83806	2.78251	2.19917	1.48068					8																		8
	2				0.481931	0.425905	0.208938	3.11633	2.82864	2.679	2.56618	2.411	1.98106	1.61351
	3			0.793784	0.755001	0.747369	2.51512	2.73179	2.72227	2.59941	2.50493	2.39736	2.13431	1.8197
	4		0.842597	0.799424	1.81122	1.83357	1.93437	2.36714	2.65924	2.49609	2.38281	2.32491	2.06703	1.75079
	5	0.467755	0.552673	2.89029	2.6234	2.16693	2.09881	2.35798	2.72909	2.59566	2.38784	2.25763	2.09381	1.75031
	6	0.279346	0.269473	0.075433	2.96759	2.71699	2.40322	2.41574	2.7482	2.53109	2.11976	1.97004	2.03832	1.8285	1.37965	1.18558
	7	0.279242	0.385419	0.365813	0.22512	0.0424019	3.12001	2.91294	2.78231	2.14551	1.97635	1.87534	1.91201	1.84491	1.54045	1.30736
	8	0.38522	0.506385	0.667671	0.699057	0.738977	1.01856	1.13338	1.77555	2.04167	2.04254	1.99717	2.07062	2.07245	1.72594	1.55107
	9	0.521835	0.780484	0.869788		0.792258	1.0281	1.51553	2.03341	2.16392	2.14528	2.21791	2.28348	2.37178	2.20103	1.97513
	10	0.227025	0.767046	0.824462	0.732496	0.848394	0.987654	1.55422	2.25922	2.42642	2.44237	2.50816	2.55376	2.6684	2.55832	2.31313
	11	3.07119	0.0563545	0.0590058	0.67095	0.686627	0.814553	0.224325	2.73365	2.76575	2.77028	2.77464	2.75555	2.87219	2.73607	2.45133
	12	0.0966773	0.0644898	0.079279	2.94184	1.20742	1.45093	1.2684	3.00071	2.99857	2.98463	2.93494	2.90984	2.97396	2.81984	2.40477
	13	2.99092	0.273009	0.322176	2.0574	1.81645	1.91595	1.81012	0.349584	0.16542	0.0328957	2.99367	2.93044	2.81713
	14		3.12162	0.113862	2.38707	2.12583	2.06974	1.86176	0.702944	0.475966	0.335381	0.184131	3.13764	2.87363
	15			0.0014105	2.71632	2.24594	2.25223	1.24052	0.875536	0.748871	0.686753	0.652223	0.482843	0.303684
	16				2.5962	2.07938	2.12608	1.07826	0.971841	0.921485	0.928376	0.90969	0.793463	0.438109
	17					1.8188	1.36764	1.09581	1.03313	1.0194	1.08185	1.27556	1.14628	0.255745
9	1					3.08413	0.219052	2.97268	2.76789	2.7774	2.95098	3.13506	2.05898	1.85465					9																		9
	2				0.500182	0.367067	3.04631	2.99871	2.8034	2.62824	2.55735	2.2456	1.98403	1.87968
	3			0.847369	0.589946	2.21901	2.38678	2.73222	2.70097	2.52668	2.44663	2.34369	2.26595	2.09868
	4		0.448576	0.391921	2.32662	2.10959	2.14495	2.52866	2.68768	2.571	2.42229	2.36966	2.23334	2.01195
	5	0.158888	2.73767	2.71114	2.64133	2.38744	2.20999	2.47763	2.83454	2.79493	2.51052	2.36393	2.3242	1.98814
	6	0.0773552	3.02574	2.91687	2.87419	2.80798	2.40302	2.52822	2.96471	2.93164	2.29105	2.1322	2.13449	2.00871	1.58776	1.18791
	7	0.0382877	3.07409	0.00160248	0.0977665	0.0739834	2.93859	3.0251	2.98252	2.47957	1.9711	1.94933	2.0888	2.01105	1.70543	1.32266
	8	0.179017	0.262176	0.431982	0.542619	0.647694	0.888802	1.14629	2.083	1.92267	2.00725	1.9862	2.18583	2.20673	1.93982	1.61443
	9	3.12287	0.404147	0.595884		0.684915	1.02759	1.34651	2.0092	2.12545	2.10117	2.19027	2.33889	2.44512	2.33767	2.10792
	10	2.80399	2.09894	0.857989	0.54157	0.742164	1.00475	1.55253	2.18441	2.33534	2.3868	2.46014	2.57872	2.71601	2.65245	2.44059
	11	3.07609	2.89865	2.58702	0.216969	0.811866	0.927351	1.37441	2.56634	2.65965	2.71349	2.74236	2.78575	2.93487	2.83893	2.57019
	12	3.06451	2.92936	2.74599	2.40724	1.76344	1.73761	1.64811	2.79256	2.9181	2.92274	2.91345	2.91831	3.00449	2.907	2.49306
	13	2.95962	0.168218	3.00448	2.84571	2.433	2.06113	1.92729	1.89744	0.0966583	3.10227	2.9127	2.84629	2.73948
	14		0.115979	3.10444	3.06094	2.491	2.25836	2.14412	1.14633	0.478302	0.32522	0.250228	0.0168687	2.86735
	15			3.10531	2.74679	2.36218	2.43229	2.18101	0.841317	0.76819	0.788067	0.760105	0.606382	0.336471
	16				2.68113	2.32743	2.33466	1.16671	0.959627	0.94461	1.02376	0.931439	0.766785	0.463135
	17					2.0453	1.64656	1.20151	1.04901	1.04564	1.14881	1.36333	1.10489	0.272439
10	1					2.9411	0.07674	3.10275	2.82619	2.79553	2.68357	2.76797	2.51493	2.33742					10																		10
1.8255	2				0.458234	0.47708	3.03776	3.02846	2.75361	2.63738	2.59793	2.38107	2.21944	2.06029
0.937218	3			0.822776	0.757181	1.71572	2.35705	2.70882	2.6892	2.55622	2.51094	2.3741	2.3109	2.19099
	4		0.681632	0.471905	2.08019	2.00954	2.10818	2.52813	2.71376	2.59285	2.42507	2.36274	2.24398	1.85691
	5	0.427917	2.93506	2.70819	2.48652	2.25154	2.16721	2.51455	2.85824	2.78331	2.54837	2.41107	2.19704	1.9244
	6	0.156217	0.00543493	2.99077	2.8537	2.67464	2.3634	2.54088	2.94347	2.92529	2.37578	2.13896	2.11665	1.895	1.44043	1.16902
	7	0.180227	0.169169	0.185771	0.127821	0.161003	3.11072	2.86441	3.1036	2.93298	2.07585	1.98693	2.00465	1.96093	1.6682	1.32147
	8	0.438915	0.478105	0.60766	0.6012	0.727805	0.862776	1.03176	2.92909	2.16589	2.0996	2.03941	2.15486	2.18353	1.90459	1.62298
	9	1.00814	0.800978	0.989162		0.83767	0.974409	1.26831	2.19172	2.23397	2.21779	2.19622	2.3251	2.42356	2.31267	2.08656
	10	2.28509	1.89212	1.67846	0.935519	0.851033	0.917786	1.24577	2.3952	2.449	2.45159	2.46547	2.56602	2.70388	2.63632	2.43879
	11	2.81108	2.18394	2.21917	1.24765	0.899294	0.845506	0.463658	2.78475	2.7904	2.77143	2.74926	2.77219	2.91191	2.81189	2.57865
	12	2.90528	2.89197	0.163451	1.68466	1.24462	1.41387	1.22298	3.09618	3.02682	2.98067	2.93631	2.91902	2.97733	2.87372	2.56045
	13	2.99137	0.210523	2.86874	0.588199	1.65068	1.84546	1.71775	0.551231	0.194289	0.0421163	2.983	2.91721	2.80924
	14		0.0726124	0.137427	2.66753	2.23461	2.04805	1.95568	0.830935	0.488452	0.343497	0.201797	0.00956311	2.89934
	15			0.0454951	2.68394	2.32241	2.19081	1.50885	0.88321	0.74472	0.702227	0.677928	0.545248	0.417794
	16				2.70962	2.27944	2.03576	1.0822	0.982805	0.922112	0.97365	0.89032	0.798467	0.516242
	17					2.035	1.60523	1.16962	1.06632	1.02201	1.10396	1.26533	1.13602	0.293866
