# Supplementary material for: Stationary Atrial Fibrillation Properties in the Goat Do Not Entail Stable or Recurrent Conduction Patterns
Source: Front Physiol. 2018 Jul 27;9:947. doi: 10.3389/fphys.2018.00947 (PMC6072874; doi:10.3389/fphys.2018.00947)
Supplement: Supplementary file 1 [file Data_Sheet_1.ZIP › Goat_8_Property maps.xlsx]

## Sheet: AFCL
AFCL
Signals of insufficient quality were excluded from the property maps. Signals could be rejected based on noise low amplitude, large artefact or ventricluar farfields that could not be substracted.
		1	2	3	4	5	6	7	8	9	10	11	12	13	14	15	16	17
1	1					0.120308	0.119346	0.119346	0.119346	0.119346	0.116458	0.112608	0.112608	0.114533					1																		1
	2				0.12127	0.120308	0.120308	0.12127	0.119346	0.117421	0.116458	0.112608	0.110683	0.112608	0.111646
0.0065442	3			0.122233	0.120308	0.120308	0.120308	0.12127	0.119346	0.116458	0.115496	0.112608	0.110683	0.111646	0.111646	0.110683
	4		0.123195	0.12127	0.120308	0.120308	0.12127	0.122233	0.12127	0.115496	0.113571	0.112608	0.111646	0.112608	0.110683	0.109721	0.109721
	5	0.124158	0.122233	0.122233	0.12127	0.12127	0.12127	0.123195	0.120308	0.115496	0.112608	0.112127	0.111646	0.111646	0.109721	0.109721	0.109721	0.108758
	6	0.123195	0.122233	0.122233	0.12127	0.12127	0.122233	0.124158	0.122233	0.114533	0.112127	0.111646	0.110683	0.110683	0.110683	0.108758	0.108758	0.108758
	7	0.124158	0.122233	0.122233	0.12127	0.12127	0.122233	0.123195	0.123195	0.114533	0.113571	0.110683	0.109721	0.109721	0.109721	0.108758	0.108758	0.107796
	8	0.126083	0.124158	0.122233	0.121752	0.122233	0.122233	0.122233	0.124158	0.115496	0.113571	0.110683	0.110683	0.109721	0.108277	0.107796	0.121752	0.108758
	9	0.128008	0.126083	0.123195		0.122233	0.123195	0.123195	0.122233	0.119346	0.11309	0.111646	0.108758	0.107796	0.107796	0.107796	0.108758	0.108758
	10	0.128008	0.12897	0.127045	0.123195	0.123195	0.122233	0.123195	0.122233	0.12127	0.113571	0.110683	0.108758	0.108758	0.108758	0.107796	0.108758	0.110683
	11	0.128008	0.12897	0.128008	0.124158	0.123195	0.122233	0.123195	0.123195	0.117421	0.112608	0.110683	0.107796	0.107796	0.107796	0.108758	0.109721	0.114533
	12	0.12897	0.128008	0.127045	0.12512	0.12512	0.124158	0.12127	0.122233	0.112608	0.111646	0.108758	0.107796	0.107796	0.110683	0.109721	0.110683	0.118383
	13	0.127045	0.126083	0.126083	0.12512	0.12512	0.123195	0.122233	0.119346	0.110683	0.109721	0.108758	0.108758	0.109721	0.109721	0.109721
	14		0.126083	0.126083	0.126083	0.126083	0.12512	0.122714	0.119346	0.110683	0.107796	0.109721	0.110683	0.111646
	15			0.126083	0.126083	0.126083	0.127045	0.12512	0.115496	0.108758	0.107796	0.110683	0.113571	0.113571
	16				0.12512	0.12512	0.123195	0.118383	0.111646	0.105871	0.106833	0.109721	0.112608	0.116458
	17					0.12127	0.118383	0.117421	0.116458	0.107796	0.109721	0.110683	0.112608	0.12127
2	1					0.118383	0.118383	0.118383	0.117421	0.115496	0.112608	0.106833	0.105871	0.107796					2																		2
	2				0.119346	0.118383	0.119346	0.119346	0.117421	0.114533	0.111646	0.106833	0.105871	0.105871	0.103946
0.00878726	3			0.12127	0.119346	0.118383	0.120308	0.118383	0.116458	0.110683	0.108758	0.106833	0.10539	0.104909	0.103946	0.102984
	4		0.122233	0.12127	0.120308	0.119346	0.119346	0.120308	0.116458	0.108758	0.107796	0.105871	0.105871	0.104909	0.102984	0.102984	0.103465
	5	0.123195	0.122233	0.12127	0.120308	0.120308	0.12127	0.122233	0.117421	0.109721	0.105871	0.104909	0.104909	0.103946	0.102984	0.102984	0.102021	0.102984
	6	0.123195	0.12127	0.12127	0.12127	0.12127	0.12127	0.122233	0.12127	0.109721	0.105871	0.103946	0.102984	0.102984	0.102021	0.102984	0.102984	0.102021
	7	0.123195	0.12127	0.122233	0.122233	0.12127	0.12127	0.12127	0.12127	0.108758	0.106833	0.103946	0.103946	0.102021	0.101059	0.102984	0.102021	0.102021
	8	0.124158	0.123195	0.122233	0.122233	0.12127	0.122233	0.120308	0.12127	0.110683	0.107796	0.103946	0.102984	0.102021	0.10154	0.102984	0.113571	0.102021
	9	0.126083	0.12512	0.123195		0.122233	0.12127	0.12127	0.120308	0.113571	0.107796	0.103946	0.102021	0.102021	0.102021	0.102984	0.102984	0.102984
	10	0.127045	0.127045	0.126083	0.122233	0.122233	0.12127	0.12127	0.120308	0.116458	0.108758	0.103946	0.102021	0.101059	0.102021	0.102021	0.102984	0.104909
	11	0.127045	0.127045	0.127045	0.123195	0.122233	0.119346	0.120308	0.120308	0.114533	0.106833	0.104909	0.101059	0.101059	0.102021	0.102984	0.102984	0.104909
	12	0.126564	0.127045	0.126083	0.124158	0.12127	0.118383	0.116458	0.116458	0.105871	0.102984	0.103946	0.102021	0.102984	0.103946	0.103946	0.103946	0.106833
	13	0.12512	0.12512	0.123195	0.122233	0.122233	0.119346	0.116458	0.112608	0.102021	0.101059	0.104909	0.103946	0.104909	0.10539	0.104909
	14		0.124158	0.123195	0.123195	0.124158	0.12127	0.117421	0.109721	0.102021	0.100096	0.103946	0.105871	0.105871
	15			0.123677	0.123195	0.123195	0.124158	0.120308	0.107796	0.0991338	0.0991338	0.102502	0.108758	0.107796
	16				0.123195	0.123195	0.119346	0.113571	0.104909	0.100577	0.0991338	0.102021	0.106833	0.109721
	17					0.118383	0.114533	0.115014	0.109721	0.100096	0.101059	0.105871	0.106833	0.111646
3	1					0.120308	0.120308	0.120308	0.120308	0.119346	0.116458	0.111646	0.110683	0.111646					3																		3
	2				0.122233	0.12127	0.120308	0.12127	0.119346	0.117421	0.116458	0.111646	0.110683	0.108758	0.107796
0.0073441	3			0.123195	0.12127	0.12127	0.12127	0.12127	0.119346	0.115496	0.113571	0.112608	0.110683	0.108758	0.106833	0.105871
	4		0.123195	0.122233	0.122233	0.12127	0.12127	0.122233	0.120308	0.113571	0.113571	0.111646	0.110683	0.108758	0.106833	0.105871	0.106833
	5	0.124639	0.123195	0.122233	0.122233	0.122233	0.122233	0.124158	0.12127	0.114052	0.110683	0.111646	0.110683	0.108758	0.107796	0.105871	0.105871	0.106833
	6	0.124158	0.123195	0.122233	0.122233	0.122233	0.123195	0.124158	0.123195	0.112608	0.111646	0.108758	0.109721	0.108758	0.106833	0.105871	0.106352	0.105871
	7	0.124158	0.123195	0.123195	0.123195	0.123195	0.122233	0.123195	0.123677	0.110683	0.110683	0.108758	0.106833	0.107315	0.106833	0.106833	0.105871	0.105871
	8	0.12512	0.124158	0.124158	0.123195	0.122233	0.123195	0.122233	0.123195	0.113571	0.110683	0.106833	0.107796	0.106833	0.106833	0.106833	0.117421	0.106833
	9	0.128008	0.126083	0.124158		0.123195	0.122233	0.122233	0.122233	0.116458	0.112608	0.108277	0.106833	0.105871	0.105871	0.106833	0.107796	0.106833
	10	0.126083	0.128008	0.127045	0.123195	0.123195	0.122233	0.122233	0.122233	0.120308	0.113571	0.109721	0.106352	0.105871	0.103946	0.105871	0.108758	0.109721
	11	0.127045	0.12897	0.127045	0.124158	0.122233	0.120308	0.12127	0.122233	0.115496	0.110683	0.107796	0.104909	0.105871	0.105871	0.107796	0.107796	0.113571
	12	0.128008	0.127045	0.12512	0.124158	0.122233	0.119346	0.116939	0.118383	0.111646	0.107796	0.107796	0.105871	0.105871	0.108758	0.106833	0.106833	0.114533
	13	0.127045	0.12512	0.124158	0.123195	0.123195	0.120308	0.119346	0.114533	0.108758	0.105871	0.106833	0.107796	0.109721	0.109721	0.108758
	14		0.12512	0.124158	0.124158	0.124158	0.123195	0.118864	0.114533	0.107315	0.104909	0.105871	0.110683	0.110683
	15			0.124158	0.124158	0.124158	0.124158	0.122233	0.110683	0.104909	0.105871	0.106833	0.112608	0.114533
	16				0.123195	0.123195	0.119827	0.116458	0.107796	0.104909	0.104909	0.106833	0.110683	0.113571
	17					0.120308	0.115496	0.116458	0.113571	0.105871	0.105871	0.108758	0.110683	0.119346
4	1					0.12127	0.120308	0.119346	0.119346	0.118383	0.116458	0.110683	0.110683	0.111646					4																		4
	2				0.12127	0.12127	0.12127	0.12127	0.120308	0.116939	0.115496	0.110683	0.109721	0.109721	0.109721
0.00676019	3			0.122233	0.12127	0.12127	0.12127	0.120308	0.118383	0.115496	0.114533	0.110683	0.109721	0.110683	0.10924	0.108758
	4		0.124158	0.122233	0.12127	0.120308	0.12127	0.122233	0.12127	0.113571	0.111646	0.111646	0.109721	0.109721	0.108758	0.108758	0.107796
	5	0.12512	0.122233	0.122233	0.12127	0.121752	0.12127	0.123195	0.12127	0.112608	0.110683	0.110683	0.110683	0.109721	0.108758	0.108758	0.108758	0.107796
	6	0.124158	0.122233	0.122233	0.122233	0.12127	0.122233	0.123195	0.124158	0.112608	0.109721	0.108758	0.108758	0.108758	0.108758	0.108758	0.107796	0.107796
	7	0.124158	0.122233	0.122233	0.122233	0.122233	0.123195	0.124158	0.124158	0.114533	0.110683	0.108758	0.108758	0.107796	0.107796	0.108758	0.108758	0.107796
	8	0.12512	0.12512	0.123195	0.123195	0.122233	0.123195	0.122714	0.123195	0.115977	0.110683	0.108758	0.108758	0.107796	0.107796	0.107796	0.122233	0.107796
	9	0.127045	0.126083	0.124158		0.123195	0.123195	0.122233	0.122233	0.118383	0.112608	0.109721	0.108758	0.107796	0.108758	0.107796	0.108758	0.108758
	10	0.126083	0.128008	0.12897	0.124158	0.123195	0.123195	0.122233	0.122233	0.122233	0.113571	0.110683	0.108758	0.109721	0.106833	0.108758	0.109721	0.110683
	11	0.126083	0.12897	0.12897	0.126083	0.123195	0.122233	0.122233	0.122233	0.116458	0.112608	0.110683	0.108758	0.107796	0.107796	0.109721	0.110202	0.113571
	12	0.128008	0.128008	0.127045	0.12512	0.123195	0.12127	0.119346	0.120308	0.111646	0.112127	0.110683	0.107796	0.109721	0.110683	0.110683	0.109721	0.117421
	13	0.128008	0.127045	0.127045	0.12512	0.124158	0.123195	0.120308	0.118383	0.108758	0.108758	0.109721	0.109721	0.111646	0.110683	0.109721
	14		0.126083	0.126083	0.12512	0.12512	0.12512	0.122233	0.115014	0.107796	0.109721	0.108758	0.111646	0.112608
	15			0.12512	0.124158	0.124158	0.12512	0.123195	0.113571	0.108758	0.109721	0.109721	0.112608	0.113571
	16				0.124158	0.124639	0.119346	0.115496	0.110683	0.106833	0.107796	0.110683	0.112608	0.115496
	17					0.120308	0.115496	0.115496	0.112608	0.108758	0.108758	0.112608	0.11309	0.119346
5	1					0.12127	0.119346	0.118383	0.118383	0.117421	0.113571	0.110683	0.110683	0.111646					5																		5
	2				0.120308	0.120308	0.120308	0.120308	0.119346	0.115496	0.114533	0.110683	0.109721	0.109721	0.108758
0.00676127	3			0.122233	0.12127	0.120308	0.12127	0.119346	0.117421	0.113571	0.111646	0.110683	0.109721	0.109721	0.107796	0.107796
	4		0.123195	0.121752	0.120308	0.120308	0.120308	0.12127	0.118383	0.112608	0.111646	0.110683	0.109721	0.110683	0.107796	0.107796	0.107796
	5	0.124158	0.122233	0.12127	0.12127	0.12127	0.12127	0.123195	0.119346	0.113571	0.110683	0.109721	0.109721	0.10924	0.107796	0.108758	0.106833	0.106352
	6	0.124158	0.122233	0.122233	0.122233	0.122233	0.123195	0.124158	0.122233	0.112608	0.110683	0.107796	0.107796	0.108758	0.107796	0.107796	0.106833	0.106833
	7	0.124158	0.123195	0.122233	0.122233	0.123195	0.122233	0.123195	0.123195	0.112608	0.110683	0.109721	0.107796	0.107796	0.106833	0.106833	0.107796	0.106833
	8	0.126083	0.124158	0.123195	0.122233	0.123195	0.123195	0.122233	0.122233	0.113571	0.110683	0.109721	0.108758	0.107796	0.106833	0.106833	0.118383	0.106833
	9	0.12512	0.124158	0.124158		0.122233	0.122233	0.122233	0.12127	0.118383	0.112608	0.109721	0.107796	0.107796	0.106833	0.106833	0.107796	0.107796
	10	0.127045	0.128008	0.126083	0.122233	0.122233	0.12127	0.12127	0.12127	0.119346	0.111646	0.109721	0.106833	0.106833	0.106833	0.106833	0.107796	0.110683
	11	0.127045	0.12897	0.127045	0.123195	0.12127	0.119346	0.12127	0.12127	0.115496	0.110683	0.108758	0.104909	0.105871	0.107796	0.107796	0.107315	0.111646
	12	0.128008	0.12512	0.124158	0.122233	0.120308	0.118383	0.115496	0.118383	0.108758	0.108758	0.106833	0.104909	0.105871	0.108758	0.106833	0.108758	0.115014
	13	0.12512	0.123195	0.122233	0.12127	0.120308	0.116458	0.115496	0.113571	0.106833	0.107796	0.105871	0.106833	0.108758	0.108758	0.107796
	14		0.123195	0.12127	0.12127	0.120308	0.120308	0.115496	0.111646	0.104909	0.106833	0.107796	0.108758	0.109721
	15			0.122233	0.12127	0.122233	0.122233	0.118383	0.112608	0.106833	0.105871	0.107796	0.111646	0.111646
	16				0.12127	0.12127	0.118383	0.112608	0.107796	0.104909	0.104909	0.108758	0.110683	0.113571
	17					0.117421	0.114533	0.114533	0.111646	0.104909	0.107796	0.109721	0.110683	0.119346
6	1					0.120308	0.120308	0.120308	0.119346	0.119346	0.116458	0.109721	0.109721	0.111646					6																		6
	2				0.12127	0.120308	0.120308	0.12127	0.119346	0.117421	0.115496	0.110683	0.109721	0.108758	0.108758
0.00692531	3			0.123195	0.12127	0.120789	0.12127	0.120308	0.118383	0.115496	0.113571	0.111646	0.109721	0.108758	0.108758	0.107796
	4		0.123195	0.122233	0.12127	0.120308	0.12127	0.12127	0.119346	0.113571	0.112608	0.111646	0.110683	0.109721	0.107796	0.106833	0.106833
	5	0.124158	0.122233	0.12127	0.12127	0.12127	0.12127	0.122233	0.118383	0.113571	0.111646	0.111646	0.111646	0.109721	0.107796	0.106833	0.106833	0.105871
	6	0.124158	0.122233	0.122233	0.122233	0.123195	0.122233	0.123195	0.12127	0.113571	0.111165	0.109721	0.109721	0.107796	0.107796	0.106833	0.105871	0.105871
	7	0.124158	0.123195	0.122233	0.123195	0.122233	0.122233	0.12127	0.123195	0.112608	0.111646	0.109721	0.107796	0.108758	0.106833	0.106833	0.106833	0.106833
	8	0.12512	0.124158	0.123195	0.123195	0.12127	0.122233	0.12127	0.122233	0.114533	0.110683	0.107796	0.108758	0.108758	0.106833	0.106833	0.118864	0.106833
	9	0.126083	0.12512	0.124158		0.122233	0.122233	0.12127	0.12127	0.117421	0.112608	0.108758	0.106833	0.106833	0.105871	0.106833	0.106833	0.106833
	10	0.126083	0.127045	0.126083	0.122233	0.122233	0.12127	0.122233	0.12127	0.118383	0.111646	0.108758	0.106833	0.106833	0.106833	0.106833	0.107796	0.110683
	11	0.127045	0.127045	0.127045	0.123195	0.123195	0.120308	0.12127	0.120308	0.115496	0.109721	0.107796	0.10539	0.105871	0.106833	0.107796	0.108758	0.113571
	12	0.128008	0.126083	0.124158	0.124158	0.12127	0.119346	0.117421	0.118383	0.110683	0.108758	0.105871	0.105871	0.107796	0.109721	0.108758	0.109721	0.114533
	13	0.126083	0.124158	0.123195	0.122233	0.12127	0.119346	0.117421	0.116458	0.107796	0.106833	0.106833	0.107796	0.109721	0.109721	0.109721
	14		0.123195	0.122233	0.122233	0.122233	0.12127	0.117421	0.112608	0.104909	0.104909	0.106833	0.108758	0.109721
	15			0.122233	0.123195	0.123195	0.123195	0.120308	0.111646	0.103946	0.103465	0.106833	0.110683	0.110683
	16				0.122233	0.123195	0.119346	0.115496	0.107796	0.103946	0.104909	0.106833	0.110683	0.112608
	17					0.119346	0.114533	0.114533	0.110683	0.104909	0.106833	0.108758	0.108758	0.118383
7	1					0.119346	0.118383	0.117421	0.118383	0.117421	0.114533	0.110683	0.109721	0.110683					7																		7
	2				0.120308	0.12127	0.119346	0.120308	0.117421	0.115496	0.113571	0.109721	0.107796	0.108758	0.108758
	3			0.122233	0.12127	0.120308	0.12127	0.118383	0.116458	0.114052	0.110683	0.108758	0.107796	0.107796	0.107796	0.107796
	4		0.124158	0.122233	0.120789	0.12127	0.12127	0.12127	0.118383	0.112608	0.110683	0.108758	0.108758	0.107796	0.107796	0.107796	0.106833
	5	0.124158	0.123195	0.122233	0.12127	0.12127	0.12127	0.123195	0.12127	0.113571	0.109721	0.109721	0.108758	0.107796	0.107796	0.107796	0.106833	0.106833
	6	0.124158	0.122233	0.122233	0.122233	0.122233	0.122233	0.124158	0.122233	0.113571	0.110683	0.107796	0.107796	0.107796	0.106833	0.106833	0.106833	0.107796
	7	0.124158	0.123195	0.122233	0.122233	0.122233	0.123195	0.123195	0.124158	0.112608	0.111646	0.108758	0.107796	0.106833	0.105871	0.107796	0.106833	0.106833
	8	0.12512	0.124158	0.123195	0.123195	0.123195	0.122233	0.122233	0.123195	0.114533	0.110683	0.107796	0.107796	0.106833	0.106833	0.107796	0.115496	0.107796
	9	0.127045	0.12512	0.123195		0.123195	0.123195	0.123195	0.122233	0.117421	0.111646	0.107796	0.106833	0.106833	0.106833	0.106833	0.107796	0.107796
	10	0.127526	0.128489	0.126083	0.123195	0.123195	0.122233	0.122233	0.12127	0.120308	0.111646	0.108758	0.105871	0.105871	0.105871	0.106833	0.108758	0.109721
	11	0.128008	0.12897	0.127045	0.124158	0.122233	0.12127	0.122233	0.122233	0.118383	0.110683	0.107796	0.106833	0.106833	0.105871	0.107796	0.107796	0.110683
	12	0.12897	0.128008	0.126083	0.12512	0.122233	0.120308	0.119827	0.120308	0.11309	0.10924	0.108758	0.105871	0.105871	0.109721	0.107796	0.108758	0.114533
	13	0.127045	0.126083	0.124158	0.122233	0.122233	0.120308	0.120308	0.119346	0.107796	0.10924	0.107796	0.105871	0.109721	0.108758	0.108758
	14		0.123195	0.123195	0.123195	0.123195	0.122233	0.119346	0.114533	0.108758	0.105871	0.105871	0.108758	0.109721
	15			0.123195	0.123195	0.123195	0.123195	0.121752	0.114533	0.103946	0.104909	0.105871	0.112608	0.112608
	16				0.122233	0.123195	0.120308	0.116458	0.108758	0.102984	0.103946	0.106833	0.111646	0.114533
	17					0.12127	0.116458	0.115496	0.112608	0.106833	0.105871	0.110683	0.112608	0.12127
8	1					0.120308	0.120308	0.120308	0.119346	0.119346	0.115496	0.108758	0.109721	0.110202					8																		8
	2				0.12127	0.12127	0.120308	0.12127	0.119346	0.116458	0.114533	0.108758	0.106833	0.108758	0.107796
0.00738342	3			0.122233	0.12127	0.12127	0.12127	0.120308	0.119346	0.114533	0.111646	0.108758	0.107796	0.108758	0.106833	0.106833
	4		0.123195	0.122233	0.120308	0.12127	0.12127	0.12127	0.119346	0.112608	0.110683	0.108758	0.108758	0.107796	0.106833	0.106833	0.105871
	5	0.124158	0.122233	0.122233	0.12127	0.12127	0.12127	0.123195	0.120308	0.112608	0.108758	0.108758	0.106833	0.107796	0.106833	0.106833	0.107796	0.106833
	6	0.124158	0.122233	0.122233	0.122233	0.12127	0.123195	0.123677	0.122233	0.111646	0.109721	0.106833	0.106833	0.105871	0.105871	0.106833	0.106833	0.106833
	7	0.123195	0.123195	0.122233	0.122233	0.123195	0.123195	0.123195	0.122233	0.112608	0.109721	0.106833	0.105871	0.106833	0.105871	0.106833	0.105871	0.105871
	8	0.126083	0.124158	0.123195	0.123195	0.123195	0.123195	0.123195	0.123195	0.113571	0.110202	0.106833	0.107796	0.106833	0.105871	0.105871	0.117421	0.106833
	9	0.128008	0.126083	0.124158		0.123195	0.122233	0.122233	0.122233	0.118383	0.108758	0.106833	0.105871	0.105871	0.106833	0.105871	0.106833	0.106833
	10	0.127045	0.128008	0.128008	0.123195	0.122233	0.12127	0.12127	0.12127	0.118383	0.108758	0.107315	0.104909	0.105871	0.106833	0.106833	0.106833	0.108758
	11	0.128008	0.128008	0.128008	0.123195	0.122233	0.118383	0.12127	0.12127	0.116458	0.109721	0.106833	0.105871	0.105871	0.106833	0.106833	0.106833	0.110683
	12	0.128008	0.126564	0.12512	0.123195	0.122233	0.120308	0.117421	0.118864	0.109721	0.109721	0.106833	0.105871	0.106352	0.108758	0.107796	0.107796	0.111646
	13	0.127045	0.12512	0.123195	0.122233	0.122233	0.119346	0.117421	0.114533	0.105871	0.107796	0.106833	0.106833	0.109721	0.108758	0.108758
	14		0.124158	0.122233	0.122233	0.123195	0.122233	0.119346	0.114533	0.106833	0.106833	0.105871	0.108758	0.110683
	15			0.122233	0.12127	0.122233	0.123195	0.12127	0.113571	0.104909	0.104909	0.106833	0.112608	0.11309
	16				0.121752	0.122233	0.117421	0.113571	0.107796	0.104909	0.104909	0.107796	0.110683	0.111646
	17					0.119346	0.114533	0.112608	0.110683	0.105871	0.105871	0.109721	0.109721	0.120308
9	1					0.12127	0.120308	0.12127	0.120308	0.120308	0.116458	0.111646	0.111646	0.111646					9																		9
	2				0.12127	0.120308	0.12127	0.122233	0.12127	0.117421	0.116458	0.111646	0.110202	0.110683	0.109721
0.00705682	3			0.122233	0.12127	0.120308	0.12127	0.120308	0.119346	0.116458	0.113571	0.112608	0.111646	0.110683	0.108758	0.108758
	4		0.124158	0.123195	0.12127	0.120308	0.12127	0.122233	0.122233	0.114533	0.112608	0.111165	0.110683	0.110683	0.109721	0.108758	0.108758
	5	0.124158	0.124158	0.122233	0.122233	0.12127	0.12127	0.123195	0.12127	0.114533	0.112608	0.110683	0.111646	0.109721	0.108758	0.108758	0.107796	0.107796
	6	0.12512	0.123195	0.123195	0.123195	0.122233	0.123195	0.123195	0.122714	0.114533	0.111646	0.109721	0.108758	0.110683	0.107796	0.108758	0.107796	0.107796
	7	0.126083	0.124158	0.123195	0.123195	0.122233	0.123195	0.123195	0.122233	0.114052	0.112608	0.109721	0.10924	0.109721	0.107796	0.109721	0.107796	0.107796
	8	0.128008	0.126083	0.12512	0.124158	0.123195	0.123195	0.122233	0.123195	0.115496	0.111646	0.107796	0.108758	0.107796	0.107796	0.108758	0.117421	0.107796
	9	0.12897	0.127045	0.12512		0.123195	0.122233	0.122233	0.122233	0.117421	0.113571	0.108758	0.105871	0.106833	0.106833	0.108758	0.108758	0.108758
	10	0.128008	0.12897	0.127045	0.124158	0.124158	0.122233	0.122233	0.12127	0.119346	0.113571	0.108758	0.106833	0.105871	0.107796	0.108758	0.109721	0.111646
	11	0.128008	0.128008	0.128008	0.12512	0.122233	0.12127	0.122233	0.122233	0.117421	0.111646	0.109721	0.106833	0.105871	0.107796	0.108758	0.108758	0.113571
	12	0.127045	0.126083	0.12512	0.124158	0.123195	0.12127	0.119346	0.120308	0.110683	0.10924	0.108758	0.105871	0.107796	0.111646	0.108758	0.110683	0.115496
	13	0.126083	0.12512	0.124158	0.123677	0.123195	0.122233	0.119346	0.118383	0.107796	0.106833	0.106833	0.107796	0.109721	0.109721	0.109721
	14		0.124158	0.124158	0.124158	0.124158	0.123195	0.121752	0.115496	0.104909	0.105871	0.105871	0.109721	0.110683
	15			0.124158	0.123195	0.124158	0.12512	0.123195	0.112608	0.104909	0.104909	0.106833	0.110683	0.112608
	16				0.124158	0.123195	0.120308	0.117421	0.108758	0.103946	0.103946	0.105871	0.110683	0.114533
	17					0.120308	0.117421	0.116458	0.113571	0.106833	0.106833	0.108758	0.108758	0.120789
10	1					0.122233	0.120308	0.120308	0.119346	0.119346	0.114533	0.110683	0.109721	0.110683					10																		10
	2				0.123195	0.122233	0.12127	0.12127	0.119346	0.115496	0.115496	0.110683	0.108758	0.108758	0.107796
0.00736951	3			0.123195	0.122233	0.122233	0.122233	0.120308	0.118383	0.113571	0.112608	0.109721	0.108758	0.108758	0.108277	0.106833
	4		0.12512	0.123195	0.123195	0.12127	0.122233	0.122233	0.118383	0.112608	0.110683	0.110683	0.108758	0.108758	0.107796	0.106833	0.107796
	5	0.12512	0.124158	0.123195	0.122233	0.122233	0.122233	0.124158	0.120308	0.112608	0.109721	0.109721	0.108758	0.108758	0.106833	0.106833	0.105871	0.105871
	6	0.126083	0.124158	0.123195	0.123195	0.123195	0.124158	0.124158	0.122233	0.112608	0.109721	0.106833	0.106833	0.107796	0.106833	0.106833	0.105871	0.106833
	7	0.126083	0.12512	0.12512	0.123195	0.123195	0.124158	0.124158	0.123195	0.113571	0.110683	0.108758	0.108758	0.106833	0.105871	0.106833	0.106833	0.106833
	8	0.128008	0.126083	0.124158	0.124158	0.123195	0.123195	0.123195	0.124158	0.114533	0.112608	0.107796	0.107796	0.107315	0.106833	0.106833	0.117421	0.107796
	9	0.128008	0.128008	0.126083		0.124158	0.122714	0.122233	0.123195	0.116458	0.110202	0.108758	0.106833	0.107796	0.106833	0.107796	0.107796	0.107796
	10	0.126083	0.128008	0.127045	0.12512	0.124158	0.122233	0.122233	0.123195	0.120308	0.110683	0.108758	0.106833	0.107796	0.107796	0.107796	0.107796	0.108758
	11	0.127045	0.128008	0.128008	0.124158	0.120308	0.119346	0.12127	0.122233	0.116939	0.110683	0.108758	0.107796	0.107796	0.107315	0.107796	0.107796	0.110683
	12	0.128008	0.126083	0.12512	0.124158	0.12127	0.119346	0.116458	0.118383	0.110683	0.106833	0.107796	0.107796	0.107796	0.109721	0.108758	0.108758	0.112608
	13	0.126083	0.12512	0.123195	0.12127	0.12127	0.120308	0.117421	0.114533	0.106833	0.105871	0.107796	0.107796	0.109721	0.108758	0.108758
	14		0.124158	0.123195	0.123195	0.122233	0.122233	0.118383	0.111646	0.104909	0.105871	0.106833	0.108758	0.109721
	15			0.123195	0.122233	0.123195	0.123195	0.120308	0.111646	0.105871	0.105871	0.106833	0.111646	0.111646
	16				0.122233	0.122233	0.119346	0.114533	0.108758	0.105871	0.104909	0.106833	0.110683	0.112608
	17					0.120308	0.115496	0.115496	0.112127	0.106833	0.106833	0.108758	0.109721	0.116458

## Sheet: DISS
MaxDissociation
Signals of insufficient quality were excluded from the property maps. Signals could be rejected based on noise low amplitude, large artefact or ventricluar farfields that could not be substracted.
		1	2	3	4	5	6	7	8	9	10	11	12	13	14	15	16	17
1	1					14.1149	14.8287	14.9863	17.3848	18.4377	20.1042	17.0774	14.6042	12.3589					1																		1
	2				15.6253	16.3924	18.8676	19.1089	21.5486	21.7567	20.9962	18.9195	16.1636	14.9028	13.3488
0.0065442	3			16.7434	15.5198	15.7211	19.7188	22.1476	26.1362	23.8667	20.6919	17.8652	15.7889	15.3247	13.5444	10.5322
	4		19.428	18.247	15.5259	15.841	21.2595	26.0299	28.7118	25.9313	20.015	17.2812	17.3128	16.6206	14.2833	11.3566	8.05311
	5	14.7711	18.7737	17.9118	15.8196	17.9583	21.7315	26.1875	28.4479	25.0692	18.5169	16.7589	16.848	17.2556	15.1843	12.3787	8.5	5.62684
	6	14.9816	17.8381	15.2736	16.344	18.104	20.6781	25.8097	28.532	25.3939	19.5383	17.5554	16.572	15.9131	14.6519	12.5751	9.13455	5.95795
	7	15.7254	18.8479	16.2707	17.3855	17.3823	19.3153	23.9287	28.1247	27.0491	22.0433	19.7726	16.2606	14.8081	12.9963	26.6721	24.8945	22.4408
	8	20.6054	22.4262	19.1741	17.5654	18.0904	18.5272	21.6606	27.7181	32.6673	29.294	26.4816	18.0685	16.2326	13.931	27.4262	33.2144	23.1184
	9	25.2914	28.6058	26.2592		19.5717	19.1903	20.9393	26.4489	34.9783	34.4068	28.1511	17.2357	15.75	13.6436	27.3424	26.1335	24.2624
	10	24.9746	28.9175	27.2046	25.6923	23.1972	22.1556	22.0283	26.7611	36.4226	34.6379	27.8866	14.6947	13.6022	12.7073	11.6239	14.3784	11.9112
	11	21.0682	27.0526	27	27.9649	25.9126	24.2012	24.6126	28.7108	34.5601	30.6629	23.0258	14.3521	13.7223	13.2359	11.304	16.1492	14.3275
	12	19.3461	23.5105	24.1642	25.6454	25.7263	24.6397	25.5456	29.6581	29.0674	26.6772	19.4475	14.6588	14.4481	13.714	11	14.8547	13.0438
	13	15.8222	18.3382	16.605	17.1905	19.6025	24.0184	25.9595	29.2427	26.4741	23.4015	18.3315	15.255	15.1605	13.0092	15.4249
	14		12.0394	12.8195	14.0083	17.5445	22.4119	27.6081	28.6523	24.4296	20.5411	18.6783	18.5519	17.4294
	15			9.8	11.3896	19.5729	24.7453	29.5772	27.6871	21.5074	17.3927	17.4078	18.4167	16.699
	16				14.1065	18.4458	22.3035	24.9217	24.7156	18.5128	14.255	16.1194	19.4545	17.4626
	17					16.0504	16.949	18.1	18.7269	15.0556	12.2067	12.1869	16.7419	15.1463
2	1					16.2907	15.8233	17.8369	20.2139	20.5651	21.7852	17.1893	13.1581	12.0215					2																		2
	2				17.252	19.3066	21.5734	22.9981	25.1462	23.8677	22.232	18.1687	15.4127	14.0792	12.2189
0.00878726	3			17.7584	16.2244	16.6051	20.4921	25.8718	29.1966	26.4183	21.1135	18.6257	16.7786	15.4505	13.807	10.1798
	4		18.984	18.9583	16.0709	15.6287	21.2583	27.8157	31.2624	27.5458	21.9176	20.0265	19.5088	18.5933	15.3927	12.5478	8.49212
	5	14.3461	17.8643	18.1032	16.9078	18.1218	21.7411	29.1069	33.3902	29.0054	22.8018	20.413	20.1211	18.6224	16.0572	14.0278	9.73217	6.26056
	6	14.4188	17.2724	15.9881	16.5706	18.5897	22.7038	28.67	33.0485	29.4639	22.2205	19.1565	17.9445	16.9321	15.7751	13.7103	10.6073	6.6049
	7	16.826	19.502	17.2515	17.6275	17.3082	21.5805	24.9624	32.002	30.4982	24.8198	21.1891	17.3846	15.5078	14.3379	25.5892	23.4007	20.9475
	8	19.3659	21.9291	19.8758	18.3407	18.6667	19.2048	21.5157	29.5198	35.4004	32.7691	27.8368	18.5287	17.2712	15.1969	25.6462	32.4792	21.3217
	9	22.5984	27.0346	25.0101		19.7311	19.6772	19.7258	27.0535	37.5843	37.4338	29.623	18.0517	17.0793	15.3293	25.4412	25.2753	23.4303
	10	22.3485	28.0579	26.786	26.484	24.1657	22.2579	22.3498	27.1969	38.0569	36.8026	30.2032	17.0585	14.5942	14.7168	13.9241	15.6055	13.7642
	11	22.0472	27.5072	29.3794	29.996	28.4911	25.9554	25.0372	29.6901	34.9608	31.5836	25.9027	16.1667	15.0189	14.5917	12.5331	15.2465	13.8079
	12	19.1155	24.7864	26.5183	28.2064	28.1139	26.7812	26.9433	29.9143	29.7067	27.1979	22.644	16.7716	16.0156	14.7007	11.5357	13.4356	10.7185
	13	16.4057	18.7166	19.377	19.4529	23.4067	26.0529	26.9561	29.3235	27.0052	23.705	20.7115	17.5648	16.2314	14.0673	15.0408
	14		13.4233	13.4053	15.0688	19.499	25.7109	28.695	29.1853	24.3643	21.1973	20.1055	20.5236	18.5371
	15			10.411	14.4584	21.288	27.1794	30.2765	27.6854	20.0696	17.1681	18.1993	18.6679	16.7855
	16				16.5273	21.4096	24.6118	25.3214	24.1646	16.5486	14.9542	15.9931	18.0934	16.0686
	17					17.2137	17.5048	17.3448	18.5341	12.8113	12.3005	12.1507	15.2993	13.5427
3	1					16.1766	15.8155	16.5	18.2441	17.7121	20.0365	16.6623	13.0704	11.8141					3																		3
	2				17.668	18.751	21.1624	21.4693	22.2451	21.5481	21.0248	18.1673	15.213	13.6745	11.065
0.0073441	3			16.4657	15.9739	15.7495	18.9222	23.854	26.821	24.6565	20.6399	18.3941	16.2897	14.9361	12.1759	9.2491
	4		17.1842	16.6815	15.1225	14.9599	20.4411	25.6527	29.2975	27.0075	21.569	19.2393	17.6471	16.6576	13.5136	10.4875	8.28546
	5	13.6329	15.901	15.4648	14.303	16.4779	20.5493	26.8934	31.7913	26.4672	20.1238	19.1328	17.7015	17.0581	14.5495	11.3961	8.42397	6.11691
	6	13.8361	17.0181	14.6861	15.4128	16.9317	21.1495	26.6073	32.3101	28.6052	22.2315	20.2278	18.0254	16.7473	14.8748	12.4742	9.27013	6.52072
	7	16.9918	19.5729	16.5131	17.2886	17.0283	19.7359	23.4553	32.0825	30.1996	24.2066	21.6618	17.6331	16.0984	14.066	26.1804	24.2644	21.9639
	8	21.7146	23.9014	29.0589	27.8081	26.9073	16.9776	20.1928	29.5758	35.9943	32.2491	27.9032	18.8851	17.8826	15.5832	26.4686	32.9312	22.5596
	9	25.0725	29.0842	34.3022		28.6781	18.5444	18.0606	27.9032	37.9385	37.1547	30.2154	18.6025	17.1329	15.7979	26.9892	27.3651	24.926
	10	23.0849	30.3264	36.3711	34.0545	30.4708	21.498	21.4271	27.7722	38.6184	37.3947	30.9182	16.5694	14.7125	14.5758	13.629	15.8197	13.5749
	11	21.6909	27.3235	29.7226	29.1181	27.084	25.4643	23.8244	28.4183	36.2205	32.647	25.6095	16.0694	15.0414	14.9159	12.5606	16.413	14.6954
	12	19.4312	24.425	26.1636	26.6998	26.5808	25.7018	24.3314	29.1751	30.2737	26.6431	21.9203	16.776	16.7388	14.898	10.8533	14.5529	11.5605
	13	15.354	18.3209	18.0123	18.813	22.7626	25.7185	26.8703	29.9792	28.4341	23.9606	20.9337	18.269	17.367	14.4881	14.9061
	14		13.2675	13.1072	15.7008	19.7809	23.6426	27.683	28.3423	23.5612	20.2291	20.2096	21.6605	20.3736
	15			10.4826	13.3765	21.0818	26.0771	30.061	27.3903	20.0447	16.2809	18.0414	19.7734	17.1184
	16				14.2977	19.3959	22.9228	24.0289	23.674	16.4991	14.3303	16.2	19.7389	17.9013
	17					15.1667	17.2606	18.6046	19.3804	14.025	12.6044	12.421	16.7788	15.7219
4	1					15.19	15.6265	15.7476	16.8301	17.9961	20.9448	16.786	12.5111	11.8019					4																		4
	2				16.1853	17.491	20.4016	19.7186	20.9	20.5067	21.7689	18.3511	15.1386	13.7077	11.5311
0.00676019	3			16.8096	15.7948	15.9365	20.3333	22.9901	25.2882	24.26	20.203	18.5093	16.4066	15.3138	13.2724	9.61162
	4		16.5142	16.7189	15.6016	15.5259	20.9085	26.1503	29.3755	26.234	21.1033	19.3536	17.1515	16.9211	13.9854	10.9453	7.48457
	5	13.8367	15.7535	15.0423	15.517	18.5309	22.1497	28.0946	30.0436	26.4288	20.4871	17.1771	17.4576	17.0499	14.767	11.6691	7.67935	5.46727
	6	13.2577	16.3044	15.0663	16.332	18.674	22.1064	26.5091	31.127	27.2224	20.5541	16.7788	16.2674	15.4343	13.8018	11.4736	8.55515	5.85091
	7	15.1697	18.9515	17.6807	17.4809	17.9538	20.9778	24.7915	31.6388	30.8409	22.7665	18.4509	15.9164	13.8739	13.2564	25.357	23.792	21.5847
	8	23.0798	25.7673	31.3755	30.5233	29.7692	19.5423	22.7876	29.8138	36.1166	30.4073	24.6048	16.8789	15.5154	13.7978	25.82	31.332	21.9255
	9	28.1712	31.47	36.0082		31.7166	21.6801	21.4578	27.9078	37.538	35.5075	26.6611	16.5101	15.0891	13.7938	25.9399	25.1894	23.5513
	10	25.7169	31.0466	37.3613	36.4949	32.8803	22.8141	22.4689	27.7278	38.57	35.334	27.0558	15.0295	14.046	14.1351	12.714	14.203	12.1255
	11	21.7552	27.4736	28.2232	28.2257	26.8819	24.452	23.662	28.4246	35.2538	31.4198	23.0241	15.4681	15.3625	14.8571	12.3815	15.9629	14.6673
	12	18.5895	24.0921	24.6729	26.3791	25.1879	25.6277	26.1314	29.0098	29.4026	26.7495	20.5331	15.2404	16.6026	15.1828	10.8336	14.2756	12.608
	13	14.4475	18.6208	17.9751	19.1626	20.5517	24.3106	27.4361	29.4069	26.1349	23.7046	20	16.8553	16.7398	14.0074	14.5746
	14		13.0331	13.5756	15.0265	17.6605	22.8821	26.8347	27.8368	23.9504	21.3603	19.592	19.5419	18.9887
	15			10.6452	13.229	20.8217	25.6748	27.924	26.4924	20.4188	17.9138	18.0438	17.8526	15.6345
	16				14.883	20.0346	24.7205	24.8337	23.4944	16.6216	16.2929	16.2634	18.1629	15.9829
	17					16.5531	18.9633	17.1209	17.0571	12.8073	13.407	12.9662	15.5124	14.2767
5	1					12.6158	14.3112	16.2982	19.1202	18.8285	20.0131	16.389	14.4136	12.4123					5																		5
	2				16.3018	16.6772	20.0217	21.2332	23.784	21.2914	21.177	17.8611	16.557	15.1204	11.9765
0.00676127	3			17.3487	16.2599	15.6653	20.5158	24.7977	26.9632	24.8022	19.8386	17.8952	18.5164	17.1042	14.3874	9.7464
	4		16.9878	17.4008	16.336	16.7854	22.7679	26.8919	29.002	26.0861	20.9779	18.6996	19.4118	18.5368	16.0877	11.6908	8.06835
	5	15.6163	18.0121	17.002	16.8116	19.2724	24.0952	28.8446	31.2694	26.6333	20.0018	18.5385	18.7367	19.1129	16.5494	13.0217	8.95691	5.91203
	6	15.4775	17.8871	14.6667	16.3173	18.7702	23.9679	28.7152	32.0139	28.243	20.8674	17.8004	16.9349	16.9583	16.381	13.0521	9.5448	6.29443
	7	16.3735	19.3333	15.7968	16.9214	17.3077	21.1022	26.2105	31.3576	30.1963	23.3651	19.9597	17.3201	15.8134	14.2626	25.0359	23.4693	20.9
	8	21.1588	22.8841	29.002	29.002	29.7907	18.2045	21.523	29.3831	35.8296	30.3722	27.1133	18.2646	17.1295	15.8829	26.1418	32.2826	21.3058
	9	23.7691	27.8912	34.8184		31.1147	18.7948	19.9579	28.1617	37.3058	36.2608	28.4388	18.3718	16.2266	15.2021	25.9589	26.0465	23.7065
	10	23.6362	29.1767	36.3765	34.9435	31.6081	22.6667	22.65	28.8472	39.0291	35.8889	28.315	16.4629	13.5624	14.2567	13.4731	15.8964	14
	11	23.2931	28.9393	28.6466	28.0081	26.4771	25.3184	26.0736	30.1083	36.916	32.9317	24.4234	15.9554	14.7411	14.5853	12.9856	15.7766	14.9437
	12	19.9623	25.6343	26.9102	27.008	26.3787	26.5568	25.8286	30.1335	29.8438	28.3729	21.1392	15.6679	16.1904	15.5967	11.7616	14.0713	11.8658
	13	17.2074	21.2342	19.623	19.4683	22.4379	25.1195	27.2605	29.5337	26.5191	25.0344	20.1416	16.8318	16.8768	14.5063	15.5903
	14		14.9556	14.5976	15.7163	19.5558	24.2874	27.6279	29.3246	23.8036	21.7446	20.0183	20.0747	18.7786
	15			10.9859	13.2164	20.7123	26.2131	29.7709	27.6229	21.8917	18.4401	19.731	20.0392	17.1011
	16				15.9536	20.1205	24.2866	26.1071	24.6033	17.6875	15.4526	17.4304	20.4074	18.6698
	17					17.2564	18.7332	18.7233	19.803	13.088	12.735	13.7477	17.9232	16.4789
6	1					13.0858	13.5655	15.4547	17.2955	18.4288	20.6941	17.0625	13.9355	12.3876					6																		6
	2				15.4831	16.3579	18.7097	20.5198	21.5029	20.8519	22.1632	18.8974	15.8631	14.1588	12.3679
0.00692531	3			16.4157	15.906	16.0858	19.1335	22.0237	25.3592	23.7462	20.1423	18.2454	16.6958	15.4011	13.8131	10.6546
	4		17.5562	17.5912	16.1357	15.1297	20.751	25.7773	28.291	26.3002	20.2635	19.3524	18.2055	18	15.7744	11.8036	7.94224
	5	14.6089	17.8008	17.2892	16.0381	17.774	22.396	28.6766	30.7583	27.6948	21.5693	19.6537	19.0558	18.3843	16.4856	12.6403	8.24101	5.63423
	6	15.2571	18.226	16.253	16.2938	17.5657	22.8974	28.6687	32.5226	28.8731	22.8601	19.4713	17.8686	17.5566	16.6812	12.7756	9.05197	6.07414
	7	17.0263	20.3642	17.4182	17.7809	17.6129	21.3267	26.0259	31.6931	29.9338	25.0056	21.8236	17.9728	16.3074	15.0287	25.7627	23.6942	21.9367
	8	20.7134	23.3057	29.3259	29.6646	28.8554	19.3916	22.3829	28.4471	34.5541	31.9133	27.8403	18.6576	17.0146	15.7616	26.8728	31.8383	22.204
	9	25.2695	29.5802	35.1265		30.2419	19.5611	19.6198	26.9423	36.1728	36.1132	29.1651	17.1843	15.9621	15.6578	26.964	26.9317	24.8062
	10	24.9046	31.4699	37.0704	34.9879	31.2068	21.9441	21.7385	27.3703	37.1289	35.324	28.9229	15.7176	14.6075	14.705	14.3662	16.7382	14.3899
	11	22.678	29.2579	29.905	29.402	27.4478	24.0557	24.0876	28.5992	34.9559	31.2169	23.8179	15.7002	15.6643	15.5771	13.049	16.6081	15.2595
	12	21.0695	26.3091	27.2398	27.3022	26.5697	25.7417	25.8288	28.8004	29.2435	27.0978	20.3895	17.1241	17.0652	15.927	11.9084	14.905	12.9189
	13	16.7975	19.9979	18.5992	18.0968	21.34	25.0733	27.0155	28.7514	26.7002	23.2256	19.4663	18.0255	17.2702	14.4301	15.7156
	14		13.3809	13.2272	13.0769	18.0953	23.7425	28.1113	28.2212	23.5525	20.5861	19.1898	20.8606	20.3199
	15			10.2796	12.3902	19.8394	25.9777	29.3452	27.2377	19.9409	17.1323	17.8795	18.9721	16.8582
	16				15.4544	19.426	23.9327	25.3919	24.5337	17.1039	14.8039	15.1418	19.0315	17.7962
	17					16.5218	17.9517	17.9159	18.4578	13.4173	12.2245	11.5793	15.859	15.4605
7	1					15.049	15.0959	16.5996	19.0601	19.0539	19.9356	17.3732	14.5164	13.1934					7																		7
	2				17.0558	18.3956	21.0118	21.6863	22.0097	21.8824	20.686	18.2309	16.3027	15.4097	12.8499
	3			17.6747	16.992	17.831	21.6998	25.5833	26.5624	24.4109	19.5492	17.808	16.8833	16.7369	14.982	10.9587
	4		17.3103	17.9308	16.6507	17.7669	24.3715	29.4024	30.3198	26.8835	21.2107	18.6157	18.083	17.9478	15.7806	12.2616	7.94955
	5	14.0407	17.1879	17.4799	16.0942	19.2988	24.918	31.068	32.5325	27.4568	20.4165	18.2894	17.6261	17.3982	15.6953	12.4488	8.81932	5.93548
	6	14.6311	17.3765	15.8206	16.3629	18.8105	23.4798	29.3717	33.2624	28.3565	21.329	17.4335	16.2154	15.5412	14.6192	12.3131	9.1939	6.20108
	7	16.901	19.7606	17.2231	17.5304	18.5639	20.998	25.6532	31.7616	29.137	23.6141	19.6885	16.4614	13.9571	13.9251	25.1216	22.8943	21.237
	8	20.9168	23.5092	30.591	30.6347	30.2961	17.7713	20.7923	28.7571	34.833	30.719	26.7022	17.1733	15.5333	14.9104	25.7153	30.0467	21.7892
	9	23.7396	28.3512	35.4283		31.4797	18.2449	19.3806	26.5434	36.9961	36.0942	28.0595	17.221	15.528	14.8595	26.1097	26.0325	23.7744
	10	22.833	28.5516	36.3616	34.9006	32.9534	20.9718	20.9415	26.0483	37.416	35.3694	29.3658	15.9155	13.8216	13.3051	12.8223	14.5474	12.8801
	11	20.519	26.5043	26.9087	26.1344	25.8818	24.02	22.5863	28.2072	35.5643	31.9963	24.2826	15.8935	14.8183	14.0857	12.7924	15.1727	13.7491
	12	18.259	24.0189	24.3872	25.125	23.8494	24.1409	23.5799	29.3418	30.7194	27.3224	21.4763	16.4314	16.1467	15.2103	10.9656	13.1808	11.4767
	13	15.4063	18.6549	18.0878	18.4214	19.9414	23.2416	25.6574	29.1315	27.7077	23.6965	20.8558	17.4371	17.0713	13.5246	14.9798
	14		13.7992	13.2567	14.1646	18.2927	22.9496	26.3869	28.5181	25.1526	20.5658	20.7181	20.4771	18.7352
	15			10.4542	12.8134	19.7469	25.4879	29.1497	27.25	20.5027	17.5568	18.8535	19.1642	17.1101
	16				15.1498	18.5703	22.8175	24.9368	24.2505	18.7571	15.4947	17.3102	21.2309	18.1946
	17					15.1215	16.8762	17.2171	18.9215	14	13.0339	12.3937	18.0396	15.8793
8	1					14.744	15.1627	15.7377	19.0886	19.2763	20.8267	16.9327	14.192	13.5322					8																		8
	2				16.6205	16.9242	19.3877	20.492	22.9804	21.7889	21.892	18.4255	15.8801	15.3034	12.778
0.00738342	3			16.1891	15.79	15.812	18.6905	23.2178	26.7241	25.0794	20.2384	18.0583	17.0847	17.1101	15.0911	10.4436
	4		16.8178	16.4507	15.3928	14.8204	19.5089	26.2945	30.9591	27.3197	21.6186	19.5608	18.8714	17.8523	15.6232	12.3661	7.8638
	5	14.5204	17.2994	16.2932	15.7088	16.93	20.6853	27.3655	31.6868	27.6199	21.2899	19.5361	18.8584	18.1022	16.5857	13.6136	8.26259	5.97846
	6	13.9182	17.6566	16.0201	15.9778	16.8695	20.5956	27.2727	32.0876	28.3789	22.7898	18.589	17.4494	16.8206	15.9434	13.7903	9.05	5.87253
	7	17.2967	20.5927	17.504	17.7137	18.0264	21.4788	26.0386	31.494	30.9089	25.3425	21.6536	17.4671	15.6136	15.8316	24.991	23.107	20.5742
	8	23.0862	25.1633	31.5101	30.8208	30.2146	18.9047	23.739	29.1673	35.5637	32.6335	27.948	18.4047	17.3214	16.1762	26.0588	30.0568	21.0538
	9	26.2183	30.354	36.2623		31.5515	19.7606	21.2575	27.382	37.6769	37.2897	28.4129	17.3043	16.6833	15.6385	26.6495	26.0577	24.0472
	10	24.5934	29.556	37.0331	35.6202	33	23.2823	23.638	27.899	38.2932	35.5137	29.3429	14.9149	14.3911	14.4383	13.9982	16.7554	14.128
	11	22.7975	28.3132	29.4553	29.2298	27.7535	25.1984	25.2744	29.4198	35.2046	32.4346	23.5414	15.3946	14.9893	14.4409	12.8654	16.6414	14.9696
	12	20.5908	27.0123	27.9141	28.6253	26.512	25.279	25.8054	29.8136	30.4073	28.7151	21.0753	15.9123	15.8851	15.1859	10.8825	15.6965	13.4421
	13	17.4274	21.1209	20.9293	20.5677	22.058	25.1265	26.3333	29.9962	27.4847	25.3895	19.7807	16.7549	16.3825	13.4438	15.3436
	14		14.2085	14.6285	15.7616	19.2848	24.1426	27.3379	28.7936	24.5778	21.3602	19.5982	19.6788	18.1506
	15			11.4888	14.9658	22.5899	28.0665	29.9763	27.7121	20.8887	17.2199	18.6111	19.1065	16.8023
	16				16.7776	22.4659	26.1	26.2424	24.2291	17.1041	15.3611	16.5877	20.2183	17.3734
	17					17.627	18.4415	17.8302	18.5914	12.8628	12.6929	13.0055	17.1305	15.8147
9	1					15.782	16.1604	17.7988	19.1208	18.9843	20.5624	16.619	12.987	12.2817					9																		9
	2				18.2311	19.6315	22.4177	23.614	23.8929	22.052	21.5632	18.3141	15.7808	14.6106	12.4194
0.00705682	3			18.6419	17.49	18.0697	23.2954	26.8337	28.1937	25.9733	20.6222	18.1434	16.2921	15.9982	13.8891	10.4928
	4		19.1548	20.1512	18.1457	18.5797	24.7634	29.8472	30.4664	26.8175	21.2838	18.3892	18.0897	17.693	14.6917	12.1591	7.28
	5	15.54	19.7189	19.261	18.6431	20.1936	24.9261	30.3394	32.3261	26.5905	20.0653	18.2768	18.0185	17.6172	16.3128	12.9152	8.49278	5.38225
	6	16.8128	20.7404	18.4494	17.5894	18.8337	24.0364	30.1891	33.0279	28.2822	22.1022	18.2953	16.8297	17.4499	16.37	13.6473	9.07928	5.78018
	7	19.7831	24.0081	20.3165	18.7059	18.2505	22.3171	26.9638	32.4016	30.8091	24.2463	20.2555	17.0454	16.3527	15.6329	25.6196	22.6098	20.7022
	8	23.8693	26.9733	32.1711	30.3523	29.8846	20.0669	22.3554	29.0501	34.458	31.0427	26.3625	18.1387	17.1279	16.3363	25.9042	29.9429	21.2653
	9	27.3004	30.9226	36.0928		30.8004	19.8511	19.515	26.2691	36.0521	34.865	27.8636	17.4547	15.9551	15.1673	26.4828	25.573	24.2779
	10	24.6276	30.7119	36.0415	33.1918	31.9633	21.501	21.5431	26.5558	37.0216	35.5472	28.5513	15.8553	14.4813	14.1127	13.8364	15.7203	13.6311
	11	21.5702	27.6313	27.5676	26.5811	24.8864	23.1847	23.0719	28.0361	35.4507	32.1187	24.6807	15.7581	15.3375	14.9456	13.0091	16.1223	14.9447
	12	19.7979	24.8361	24.644	23.7914	23.2272	21.976	23.0572	28.6693	29.9418	27.8202	21.5842	16.2236	17.1679	15.3222	11.5073	14.3081	11.7704
	13	15.0166	18.0823	17.3922	16.6802	19.1677	22.33	24.7758	29.2422	28.3358	24.4846	19.8105	16.6523	16.4716	14.7872	15.1138
	14		12.9162	12.589	13.5102	16.7577	23.4028	26.674	29.3417	25.0037	20.472	18.864	19.5358	18.7347
	15			10.4979	13.1598	20.3402	25.9548	30.1939	28.3829	20.4686	16.0592	16.9111	18.0818	17.0818
	16				15.0595	19.5429	23.4668	25.786	23.7251	17.2791	14.4337	15.3829	19.4041	17.2237
	17					15.7209	16.651	18.0504	19.1848	13.6339	11.7941	11.4199	16.714	14.4498
10	1					15.178	16.0119	17.1392	20.4648	19.0961	20.5598	17.439	13.1079	12.1054					10																		10
	2				17.1232	18.7686	21.78	22.6375	24.2524	22.5192	21.8523	19.2099	15.2136	14.2585	11.8394
6.27647	3			16.1507	16.5091	17.4779	20.2671	25.0158	28.1683	25.9623	21.043	18.7482	16.2101	15.8456	13.9855	10.7302
	4		17.4204	18.1984	17.1215	17.0822	21.9135	27.1062	29.9981	27.0838	21.6257	19.2482	17.8799	16.9246	14.776	11.7764	8.39602
	5	13.4292	16.835	17.7328	16.8109	18.8189	22.4527	28.7223	32.5245	28.5605	22.3919	18.8689	17.7924	16.8351	15.137	12.7714	9.49198	6.10573
	6	13.0708	16.7789	16.1886	17.1996	18.2061	21.9777	27.2535	33	29.6473	23.4135	18.6875	17.3113	15.8396	14.6797	12.6089	9.23708	6.20394
	7	15.7842	19.4562	18.5407	18.2794	18.7287	20.3618	24.3071	32.1557	31.4068	24.3395	21.1214	16.6931	14.8488	13.0783	22.8472	21.1194	18.5968
	8	20.7916	24.2402	31.2947	30.8925	28.9595	17.5263	19.8242	29.502	35.3719	31.743	27.1649	17.5827	16.3106	13.7722	23.7016	26.4157	19.7207
	9	24.8368	29.3808	35.6209		29.9251	18.2385	18.1064	27.7606	36.8484	35.7301	28.6355	17.1541	15.2349	13.4866	23.9481	23.6434	21.1191
	10	23.6417	29.6967	35.2261	33.538	30.9413	21.3012	21.0699	27.736	37.7694	35.0442	28.3435	15.7878	13.7589	13.357	12.4589	14.3232	12.2724
	11	21.8745	26.7626	26.7699	26.4663	25.3929	24.0296	24.6607	29.2594	34.5607	31.1394	23.0271	15.9246	15.6369	15.0232	12.8887	16.445	14.8555
	12	19.0021	23.3589	24.041	24.5935	23.982	23.7422	24.7234	28.43	29.5278	26.3023	19.9693	16.1831	16.8795	15.0473	11.3822	15.0712	12.3301
	13	14.0787	17.2314	16.8884	17.6994	19.95	23.1243	24.834	27.0491	25.1043	22.1331	18.698	17.7567	16.8084	13.8929	15.415
	14		11.6592	12.8682	13.1911	16.8893	22.07	25.1406	25.7807	22.0322	18.8157	18.167	19.4255	18.0129
	15			10.2794	12.7278	20.4708	24.9502	27.5776	25.3358	19.045	16.6679	16.8649	17.8275	15.9757
	16				15.402	20.014	23.2417	22.4933	22.1801	16.5522	14.7057	15.6171	18.9481	16.3126
	17					16.6805	17.2648	16.7424	16.3038	12.0379	12.287	11.5582	16.6939	15.5306

## Sheet: BT
NumberOfStartingPointsBT
Signals of insufficient quality were excluded from the property maps. Signals could be rejected based on noise low amplitude, large artefact or ventricluar farfields that could not be substracted. Breaktrough can only be identified if a contiguous circle of electrodes enclose the electrode of interest. Therefore electrodes at the border or around a missing electrodes are excluded.
	1	1	2	3	4	5	6	7	8	9	10	11	12	13	14	15	16	17
1	2																		1																		1
	3						21	3	20	6	12	6	11
0.0065442	4						18	10	16	9	12	5	6	3
	5				4	6	9	13	11	13	5	5	3	8	5
	6			4	3	4	11	9	7	10	6	11	11	10	8	5
	7		7	5	6	6	6	10	8	8	15	9	5	10	11	3	1
	8		11	6	1	2	5	9	5	10	9	12	14	8	5	9	11
	9		4				15	7	2	13	26	16	8	19	15	12	20
	10		9				6	2	9	3	47	11	15	15	10	5	4
	11		8				5	11	20	19	43	12	13	13	7	9	6
	12		14	12	5	10	10	9	16	18	20	14	8	5	6	8	3
	13		8	11	9	11	15	13	21	29	12	11	7	5	5
	14			12	20	9	8	14	27	30	19	12	3
	15				14	6	8	19	26	33	16	14	10
	16					3	6	6	11	34	14	11	3
	17						12	34	26	31	8	9	12
	1
2	2																		2																		2
	3						11	4	12	8	10	6	4
0.00878726	4						14	14	16	15	10	12	3	7
	5				5	6	9	13	7	12	7	6	8	8	13
	6			3	3	11	16	10	7	17	12	9	12	8	5	4
	7		9	4	18	7	6	12	19	13	17	14	6	9	15	1	2
	8		6	3	5	4	7	2	11	17	9	19	16	9	3	6	13
	9		10				12	12	8	20	31	22	6	16	11	7	25
	10		9				10	4	17	19	35	5	8	21	14	5	10
	11		7				11	5	21	25	57	12	9	10	3	6	4
	12		13	11	8	18	17	12	15	25	28	26	19	7	4	6	2
	13		9	19	9	24	13	22	36	28	23	14	11	5	5
	14			21	21	7	9	24	27	26	27	15	8
	15				15	14	12	17	19	32	25	16	11
	16					6	7	4	8	20	19	14	12
	17						28	23	22	22	10	10	12
	1
3	2																		3																		3
	3						7	5	14	5	12	7	11
0.0073441	4						14	14	10	12	8	13	8	4
	5				4	7	9	16	12	10	4	3	4	15	4
	6			4	2	4	7	11	9	18	17	12	8	16	8	1
	7		8	10	5	4	4	9	17	12	14	15	13	15	5	3	0
	8		11	12	2	3	7	4	5	18	10	19	16	7	5	4	1
	9		7				7	9	13	30	36	12	10	22	8	11	17
	10		3				8	4	10	11	45	10	12	16	13	5	9
	11		7				11	7	17	20	50	16	17	26	7	10	3
	12		7	19	7	12	17	5	17	18	33	31	10	9	1	6	1
	13		8	10	9	14	11	15	25	26	17	12	17	9	9
	14			21	16	11	5	11	28	39	16	16	9
	15				12	10	13	27	33	31	22	22	13
	16					3	11	12	14	32	16	11	11
	17						17	27	21	20	18	9	12
	1
4	2																		4																		4
	3						10	5	12	9	8	5	13
0.00676019	4						14	12	14	10	14	9	4	6
	5				10	9	12	11	9	6	4	7	7	8	6
	6			0	2	4	13	5	10	13	9	14	4	10	9	2
	7		12	10	6	6	7	11	14	14	10	12	7	14	7	4	4
	8		8	10	4	5	2	6	5	10	9	12	11	8	3	4	12
	9		1				11	6	8	19	26	11	10	6	8	5	26
	10		5				6	5	10	16	37	5	15	15	8	3	7
	11		10				12	10	10	21	53	16	11	15	4	6	3
	12		6	10	10	11	12	8	17	23	32	25	14	7	10	3	3
	13		9	12	7	23	10	9	22	25	14	16	12	7	7
	14			11	15	12	10	13	17	22	19	12	6
	15				20	13	20	17	20	37	28	12	5
	16					11	8	11	14	17	21	19	14
	17						17	30	24	27	12	12	13
	1
5	2																		5																		5
	3						14	2	13	9	3	10	11
0.00676127	4						21	12	18	17	18	11	4	8
	5				8	17	19	16	8	8	8	7	7	13	7
	6			2	3	1	13	16	8	14	11	16	13	16	11	5
	7		9	7	13	7	4	16	11	20	21	10	10	8	7	6	0
	8		5	9	3	2	4	8	11	18	10	17	10	4	6	1	6
	9		3				9	11	7	26	28	23	9	14	15	8	18
	10		1				4	4	10	17	44	8	15	18	15	9	5
	11		16				9	8	20	19	35	14	11	14	9	9	6
	12		11	20	13	13	15	8	21	22	31	31	11	13	3	11	1
	13		3	11	12	19	10	17	25	31	22	20	13	7	10
	14			15	19	10	12	14	27	40	13	15	8
	15				16	10	15	22	30	39	26	28	4
	16					10	10	14	12	26	22	15	12
	17						23	24	17	30	19	17	10
	1
6	2																		6																		6
	3						10	4	15	7	9	4	18
0.00692531	4						15	7	12	18	10	10	2	4
	5				3	7	15	12	15	5	5	4	9	7	6
	6			3	3	8	10	15	9	14	14	8	6	13	5	3
	7		5	7	10	9	7	13	18	12	17	16	6	15	10	7	0
	8		7	8	4	6	3	8	5	24	11	15	7	13	8	3	7
	9		6				7	10	6	18	27	13	14	12	7	16	30
	10		5				6	4	13	15	34	9	15	19	17	6	3
	11		6				7	6	11	21	49	9	15	18	5	11	8
	12		7	16	12	17	16	6	17	20	24	23	10	7	1	9	4
	13		6	13	11	20	14	21	25	25	17	15	11	4	11
	14			11	21	8	15	12	21	29	16	20	7
	15				13	9	12	22	23	29	36	19	9
	16					9	6	10	10	22	9	15	6
	17						24	32	23	21	14	7	13
	1
7	2																		7																		7
	3						11	2	10	4	8	3	12
	4						27	13	10	14	17	7	4	6
	5				9	15	14	11	22	7	7	5	2	5	3
	6			2	10	6	10	18	10	15	16	13	8	12	12	4
	7		11	8	7	10	7	16	12	13	17	11	6	11	4	7	1
	8		3	5	2	4	4	5	9	23	9	8	12	8	6	4	8
	9		6				5	4	9	12	34	19	10	14	5	12	29
	10		6				4	4	9	25	50	13	11	15	8	2	1
	11		9				8	6	15	18	49	14	17	16	5	6	4
	12		6	9	11	11	8	12	13	20	31	16	11	8	4	12	5
	13		7	17	10	19	16	16	19	29	27	13	9	8	9
	14			13	23	13	11	13	14	24	19	21	10
	15				12	9	15	25	28	40	19	16	7
	16					1	8	8	16	38	15	15	5
	17						24	26	20	16	6	7	9
	1
8	2																		8																		8
	3						6	2	12	7	11	7	10
0.00738342	4						19	17	12	8	15	10	9	8
	5				4	4	9	10	5	11	2	4	14	9	7
	6			4	4	7	13	14	8	21	11	14	18	7	6	5
	7		7	9	2	6	3	12	10	12	13	9	11	13	11	4	0
	8		9	11	3	0	2	9	6	21	15	21	19	10	7	4	8
	9		3				14	10	5	22	31	19	9	12	9	14	32
	10		5				8	3	13	12	37	8	11	18	9	5	5
	11		8				12	12	15	16	48	14	8	4	6	10	5
	12		7	7	16	13	14	6	12	18	30	13	9	10	2	6	6
	13		3	12	8	17	24	18	19	35	18	17	12	6	9
	14			14	19	12	9	13	26	31	15	18	6
	15				14	12	16	21	30	27	27	14	4
	16					7	10	7	8	29	9	13	9
	17						27	28	16	21	5	9	6
	1
9	2																		9																		9
	3						13	2	11	16	11	6	11
0.00705682	4						18	17	16	7	7	9	3	10
	5				4	7	10	12	15	6	5	7	7	11	10
	6			6	6	7	8	6	16	15	15	14	11	14	9	4
	7		13	8	20	8	6	8	10	19	12	14	9	9	8	11	5
	8		14	12	5	4	2	10	6	12	11	15	19	19	9	5	8
	9		8				12	14	2	14	31	14	15	25	9	12	19
	10		2				3	8	12	22	33	11	14	19	14	7	8
	11		12				3	8	23	16	44	9	12	15	12	9	5
	12		9	10	9	9	5	10	12	21	31	27	8	4	6	4	3
	13		8	7	6	12	7	10	18	25	21	22	13	4	7
	14			15	20	10	6	15	27	30	19	20	7
	15				15	10	18	18	33	33	24	11	5
	16					4	6	4	12	22	14	12	7
	17						22	38	18	25	12	5	7
	1
10	2																		10																		10
	3						15	6	7	10	15	7	9
6.721	4						22	12	11	11	13	17	5	7
	5				4	5	12	6	5	7	2	7	11	12	3
	6			5	7	8	10	9	7	15	18	9	11	9	8	7
	7		11	7	8	7	6	9	7	10	14	13	9	11	9	5	2
	8		10	7	3	1	2	9	3	22	14	16	9	9	2	2	5
	9		3				8	16	9	14	23	15	8	19	4	8	23
	10		5				4	6	16	10	36	10	11	19	10	1	6
	11		7				6	9	19	21	42	15	9	9	5	12	4
	12		6	13	9	14	14	8	13	26	29	10	16	6	4	7	1
	13		8	12	8	16	12	21	7	26	13	14	9	5	2
	14			23	12	8	11	14	22	28	17	19	10
	15				15	9	11	14	22	26	25	17	8
	16					2	6	7	9	25	13	10	6
	17						22	19	8	14	10	15	12

## Sheet: FI
FractionationIndices
Signals of insufficient quality were excluded from the property maps. Signals could be rejected based on noise low amplitude, large artefacts or ventricluar farfields that could not be substracted. Fractionation index is particularly sensitive to noise. Therefore electrodes with substantial noise are more strictly excluded.
		1	2	3	4	5	6	7	8	9	10	11	12	13	14	15	16	17
1	1					2.09307	1.36811	0.982353	1.54688	0.978599	1.50965	1.26038	1.81439	2.33205					1																		1
	2				1.33868	1.44223	1.37945	1.66337	0.856031	0.752874	1.21839	0.962547	0.302974	0.91028	1.71614
0.0065442	3			2.06314	1.50397	1.57769	1.71287	1.59449	1.49222	1.61333	1.24197	0.900749	0.3	0.717996	0.731481	0.458564
	4		2.42799	1.83936	1.20518	1.24254	2.04591	1.71912	1.78039	1.94847	1.40901	0.955307	0.625698	1.05421	0.67037	0.415441	0.446886
	5	2.00412	1.82626	1.12024	1.11824	1.31213	1.71343	1.92742	2.21415	1.67692	1.44173	2.09159	1.03565	0.865672	0.55292	0.463235	0.123162	0.222426
	6	2.10204	1.2834	0.847082	1.032	1.04	1.24696	1.90688	2.108	1.74053	1.2972	0.54797	0.297048	0.853974	0.416206	0.347985	0.0963636	0.0731261
	7	2.06967	1.34483	0.846465	0.861446	0.907445	0.89759	1.30346	2.06036	1.75849	1.45009	1.31978	0.946396	0.392989	0.131627	0.296903	0.125455	0.196721
	8	2.27066	1.93033	0.935223	0.89336	0.781124	0.899396	1.11647	1.82961	1.79468	1.42509	1.01287	1.57037	0.794872	0.433757	0.424408	3.40882	0.530055
	9	2.75052	2.42739	1.70408		0.517172	0.854251	1.28138	1.69539	1.92126		1	0.848987	0.908759	0.481818	0.315217	0.667276	1
	10	2.74207	2.78224	2.25261	1.25101	1.39351	1.09697	1.54343	1.58502	1.86706		1.05948	0.436929	0.44708	0.245455	0.169982	0.890311	1.48771
	11	2.91898	2.68211	1.90397	1.70309	1.98984	1.49698	1.90669	1.80924	2.4438	2.14232	0.798893	0.455535	0.295826	0.194192	0.315018	1.02026	1.65891
	12	2.62208	4.16456	1.89397	1.71753	1.40123	1.46559	1.70833	2.03976	1.89888	1.8153	0.81768	0.403285	0.178506	0.850554	0.388582	1.38734	2.08964
	13	2.18828	2.06263	1.49896	1.08696	1.23395	1.30816	2.18421	2.30724	1.91111	1.46468	0.926335	0.361468	1.0203	0.800738	0.823748
	14		1.61826	1.15975	0.937759	1.32091	1.56557	1.83232	2.21611	1.81801	1.05667	0.577206	0.768519	1.84557
	15			1.29375	1.24167	1.59583	2.48033	2.28659	2.03647	1.40335	0.844037	0.849162	1.06439	0.769524
	16				1.79123	1.97292	1.95927	1.81996	1.67232	0.80292	0.686703	0.951493	1.51515	3.1122
	17					1.68952	1.37059	1.72941	1.81731	0.933333	2.12268	1.54579	1.93169	2.80122
2	1					1.99031	1.35728	1.01553	1.80732	1.36782	1.65741	1.04821	1.6714	2.22621					2																		2
	2				1.57087	1.53906	1.65753	2.01949	1.27885	0.94896	1.39227	0.861456	0.261023	0.90493	1.56217
0.00878726	3			2.26733	1.72047	1.63261	1.99803	1.71068	1.59733	1.88991	1.27928	0.789661	0.27768	0.830389	0.770175	0.381533
	4		2.59481	1.99405	1.37795	1.44008	2.00587	1.83333	2.02471	1.91382	1.54122	1.0885	0.712014	1.13677	0.647469	0.413913	0.325744
	5	2.13481	1.78842	1.23413	1.25098	1.4499	1.79249	2.14059	2.43152	1.95487	1.50973	2.18421	1.24912	0.926573	0.655113	0.394783	0.08	0.197183
	6	2.11022	1.34592	0.878728	1.19085	0.948718	1.41352	2.06958	2.39417	1.96751	1.38448	0.808696	0.413495	0.904181	0.477509	0.399651	0.0994764	0.0769231
	7	2.09	1.50598	1.13573	1.0259	0.827038	0.880716	1.4495	2.24752	2.13818	1.66431	1.37478	1.05594	0.554404	0.115517	0.342657	0.141115	0.241681
	8	2.29472	2.08097	1.1523	0.995992	0.78373	0.982107	1.18039	1.97222	2.21218	1.71936	1.05903	1.78783	0.867012	0.392055	0.50613	3.36792	0.613636
	9	2.67828	2.40122	1.67002		0.593625	0.744094	1.27219	1.93478	2.34082		1.09075	0.915517	0.858621	0.496552	0.375433	0.888502	1.15679
	10	2.64948	2.73967	2.18724	1.264	1.36527	1.07937	1.50198	1.68898	2.13662		1.33975	0.581756	0.428082	0.267703	0.237931	1.07266	1.63121
	11	2.65298	2.63093	1.91134	1.76353	1.91339	1.40891	1.96673	1.92593	2.67537	2.34875	1.09204	0.593537	0.332186	0.290657	0.327526	1.04688	1.67684
	12	2.54845	4.16222	1.91463	1.68537	1.4224	1.62188	1.58223	2.14095	2.03534	2.03472	1.05934	0.474048	0.232236	0.963028	0.373913	1.41093	1.949
	13	2.29006	2.08214	1.64919	1.22645	1.42659	1.60784	2.26908	2.21257	1.96522	1.53345	1.05594	0.411054	1.24028	0.877876	0.948582
	14		1.73211	1.21385	0.989879	1.43002	1.72475	2.02124	2.17248	1.64605	1.0119	0.686851	0.865149	1.86572
	15			1.3681	1.357	1.77079	2.65121	2.44314	2.09042	1.35314	0.820034	0.824957	1.04286	0.670213
	16				1.89718	2.03213	2.17451	2.03025	1.56283	0.693356	0.687606	0.991319	1.62837	2.9657
	17					1.94314	1.53269	1.84	1.73849	0.939966	2.19072	1.68972	2.0233	2.61842
3	1					2.03571	1.37897	0.897233	1.63386	1.08755	1.39539	1.04291	1.50556	2.17286					3																		3
	2				1.40241	1.4759	1.58218	1.97822	1.00588	0.726923	1.18476	0.879182	0.279113	0.741818	1.52888
0.0073441	3			2.18548	1.60843	1.59118	1.84032	1.72189	1.62257	1.69829	1.1903	0.856877	0.319188	0.724453	0.685817	0.34767
	4		2.41296	1.78629	1.3012	1.46092	2.13373	1.79042	2.00391	1.91948	1.4459	0.944341	0.542279	1.1184	0.502712	0.286477	0.402154
	5	1.96957	1.66263	1.17304	1.14545	1.45783	1.84507	2.01006	2.47244	1.79362	1.36599	2.14207	1.00549	0.912886	0.504505	0.333333	0.116279	0.201439
	6	2.08811	1.29435	0.871227	1.17234	1.00201	1.29091	2.08907	2.33598	1.8893	1.32593	0.79566	0.413043	0.82852	0.397138	0.335702	0.0876565	0.0630631
	7	2.22086	1.48583	1.09899	1.01423	0.828283	0.951613	1.35772	2.24346	2.17164	1.6107	1.48364	1.06115	0.504472	0.128342	0.303571	0.156475	0.194946
	8	2.38604	2.17659	1.40854	0.989899	0.798387	0.957317	1.15462	1.89495	2.11742	1.65314	1.16846	1.6912	0.866548	0.440072	0.45781	3.34825	0.624549
	9	2.78675	2.44764	1.82353		0.580972	0.792339	1.37172	2.07056	2.18654		1.16338	1.06835	1.02693	0.529517	0.392086	0.865108	1.12996
	10	2.54451	2.74428	2.18763	1.31111	1.35211	1.04435	1.51822	1.72581	2.08806		1.34727	0.603604	0.464286	0.358289	0.333333	1.10747	1.69476
	11	2.74066	2.69958	1.89441	1.7943	2.004	1.41468	1.94212	1.96414	2.60076	2.18484	1.07847	0.567616	0.419065	0.375671	0.363472	1.13043	1.83716
	12	2.70208	4.225	1.9407	1.77079	1.42715	1.64522	1.64133	2.04475	2.09497	1.90217	1.02174	0.519713	0.322004	1.00182	0.423913	1.4562	2.14844
	13	2.36232	2.16356	1.69877	1.16463	1.38028	1.57677	2.32024	2.2197	1.98901	1.46953	1.00179	0.476534	1.17248	0.873394	0.93186
	14		1.7572	1.29072	1.05533	1.39351	1.68273	2.10568	2.41874	1.87934	1.10657	0.726465	0.894834	1.9684
	15			1.31493	1.3642	1.69939	2.4929	2.37795	2.01859	1.4347	0.908766	0.886486	1.09363	0.787594
	16				1.78234	2.06939	2.14851	1.99229	1.68132	0.782531	0.637343	0.9875	1.65185	3.25237
	17					1.8996	1.50193	1.79463	1.92655	0.90161	2.09074	1.63419	2.03903	2.79371
4	1					1.95	1.3083	0.847358	1.64648	1.31774	1.57524	1.369	1.88519	2.20935					4																		4
	2				1.43426	1.42315	1.49702	1.86028	0.980392	0.785029	1.34848	0.909926	0.277264	0.891544	1.56593
0.00676019	3			2.30661	1.61155	1.55754	1.69444	1.59604	1.50392	1.70968	1.21442	0.877778	0.272894	0.807339	0.680073	0.283122
	4		2.48374	1.76908	1.21713	1.39641	2.00398	1.59719	1.94862	1.86226	1.40221	0.983425	0.609489	0.977982	0.448087	0.308394	0.30127
	5	2.07551	1.72727	1.1831	1.12826	1.48104	1.71856	1.87123	2.22178	1.69101	1.50923	2.01292	1.01107	0.81146	0.570642	0.349091	0.076087	0.132727
	6	2.19223	1.38105	0.879518	1.1831	1.002	1.23494	1.9574	2.23387	1.72897	1.24954	0.621572	0.271062	0.70438	0.379817	0.311475	0.0723327	0.0545455
	7	2.24242	1.44242	1.06024	0.955734	0.746988	0.879032	1.48381	2.08571	2.04167	1.42647	1.12909	0.883636	0.393053	0.110909	0.229508	0.133212	0.189435
	8	2.58896	2.37755	1.14659	0.955375	0.674089	0.965726	1.20842	1.9332	2.09178	1.61468	0.972426	1.46972	0.727768	0.259928	0.361818	3.78044	0.605455
	9	3.05219	2.62526	1.80573		0.540486	0.794769	1.2992	2.08016	2.26901		1.05341	0.844607	0.770909	0.448905	0.342441	0.710383	1.12454
	10	2.71694	2.76907	2.2395	1.29328	1.38945	1.2404	1.49098	1.67742	2.05128		1.16171	0.471455	0.411765	0.277477	0.245902	1.10701	1.67416
	11	2.8476	2.70402	1.83579	1.90269	1.93279	1.526	1.932	1.83333	2.48846	2.1791	0.918519	0.486339	0.357013	0.31685	0.274074	1.18182	1.85769
	12	2.69053	4.17364	1.78675	1.73156	1.36364	1.58812	1.6	2.02941	1.91948	1.91651	0.911765	0.477231	0.20696	0.929104	0.340111	1.53445	2.24152
	13	2.33613	2.11667	1.71784	1.2378	1.30629	1.51303	2.2279	2.14395	1.97967	1.50092	0.97075	0.408425	1.20446	0.795539	0.856354
	14		1.83644	1.31677	0.985714	1.2863	1.70732	2.0757	2.16129	1.70588	1.14338	0.619308	0.908752	1.76792
	15			1.32158	1.32311	1.66393	2.4126	2.326	2.08745	1.49446	0.899083	0.791971	1.0709	0.840909
	16				1.81314	1.98167	2.03733	1.91587	1.64498	0.693694	0.663653	0.926335	1.55805	3.2419
	17					1.77956	1.51351	1.80614	1.8308	0.818349	2.13211	1.5666	2.0019	2.84418
5	1					1.85347	1.27789	0.984405	1.6376	1.25626	1.49906	1.2422	1.77022	2.22905					5																		5
	2				1.34122	1.40945	1.37402	1.81423	1.07198	0.779048	1.24859	0.817185	0.283906	0.793796	1.63834
0.00676127	3			2.26854	1.61584	1.65149	1.89526	1.69261	1.49903	1.63619	1.16512	0.898897	0.306569	0.872029	0.704505	0.305755
	4		2.59878	1.90381	1.38735	1.51575	2.16667	1.76817	1.91797	1.93633	1.48897	1.02015	0.670956	1.19301	0.513417	0.329114	0.321364
	5	1.91633	1.83099	1.08617	1.07214	1.58847	2.00794	1.92629	2.41473	1.91115	1.47048	2.12088	1.10055	1.00729	0.567325	0.369565	0.0861759	0.206463
	6	2.01434	1.22782	0.810101	1.02008	1.00605	1.40361	2.15758	2.31412	1.87199	1.40331	0.633394	0.287523	0.78442	0.413238	0.355476	0.103943	0.059246
	7	2.19184	1.33737	0.847082	0.830645	0.821862	0.897796	1.3664	2.1899	2.02804	1.54128	1.45421	1.00362	0.452899	0.152878	0.308797	0.142599	0.191071
	8	2.23711	1.93699	1.05882	0.935614	0.810865	0.854251	1.05812	1.96371	2.06367	1.73704	1.14625	1.66971	0.861511	0.334532	0.54219	3.57002	0.56295
	9	2.68454	2.31828	1.73061		0.496982	0.7666	1.33667	1.93014	2.21346		1.06581	0.944043	0.865108	0.516995	0.413238	0.831843	1.19746
	10	2.66528	2.79002	2.22428	1.30444	1.17576	1.05754	1.48	1.53571	2.0233		1.30586	0.562387	0.473779	0.276481	0.263441	1.06364	1.69982
	11	2.83784	2.74059	1.90852	1.68623	1.72962	1.52148	1.98211	1.97244	2.58779	2.43542	1.05109	0.58467	0.346429	0.330341	0.35368	1.15135	1.84615
	12	2.65272	4.1157	1.85102	1.73293	1.47535	1.72832	1.81143	2.16634	2.19118	2.18099	1.01989	0.496429	0.22242	0.893309	0.392473	1.54845	2.13786
	13	2.35524	2.03259	1.57863	1.09921	1.4714	1.60116	2.36882	2.39139	2.13043	1.62387	1.08781	0.402504	1.26812	0.790235	0.866426
	14		1.77576	1.22908	1.01587	1.43227	1.76969	2.02099	2.26306	1.77679	1.21763	0.848263	0.958106	1.89668
	15			1.4004	1.32265	1.74849	2.56574	2.42136	2.25891	1.5343	0.982111	0.990975	1.11754	0.784644
	16				1.82056	2.0743	2.15613	2.00752	1.64351	0.839286	0.769643	1.04945	1.63333	3.22727
	17					1.90998	1.51056	1.87405	1.84015	0.915619	2.23551	1.66239	2.10487	3.002
6	1					1.93825	1.27579	0.874016	1.62427	1.14815	1.58891	1.29228	1.81434	2.34393					6																		6
	2				1.36978	1.4334	1.48509	1.89526	1.13307	0.725	1.16129	0.794872	0.304745	0.974453	1.68852
0.00692531	3			2.27108	1.658	1.62675	1.84064	1.64427	1.42718	1.6553	1.1779	0.850554	0.238616	0.880218	0.764065	0.334539
	4		2.48394	1.87976	1.35928	1.32335	2.00199	1.68986	1.93164	1.86492	1.38404	0.964945	0.666055	1.12821	0.561372	0.421622	0.315884
	5	1.98185	1.8008	1.20884	1.2004	1.516	1.83	2.07984	2.44055	1.79775	1.48429	2.05185	1.17658	0.934426	0.568592	0.408273	0.129496	0.187387
	6	2.19592	1.48	0.862348	1.09859	0.886869	1.32394	2.13454	2.18468	1.85606	1.42831	0.744917	0.359489	0.836625	0.496377	0.378815	0.102151	0.0740072
	7	2.36842	1.55936	1.03838	0.805274	0.818548	0.917836	1.33466	2.14059	1.98488	1.6903	1.40182	1.04529	0.513562	0.129032	0.307971	0.133094	0.195298
	8	2.48984	2.28138	1.23014	0.867886	0.759036	1.00201	1.00992	1.98603	2.05693	1.59225	1.09074	1.69581	0.826325	0.311828	0.489247	3.59604	0.570397
	9	2.97531	2.49794	1.71837		0.649194	0.803607	1.22772	1.99006	2.33592		1.03303	0.942755	0.927798	0.469858	0.390288	0.785971	1.19928
	10	2.81328	3.03534	2.45963	1.2996	1.33936	1.03393	1.48503	1.66139	1.99805		1.25321	0.523381	0.424731	0.327338	0.278276	1.08182	1.71455
	11	3.06144	3.03805	2.14256	1.83061	2.01205	1.37773	2.0498	1.93651	2.49808	2.39338	1.02004	0.48474	0.366248	0.351254	0.377495	1.1685	1.88952
	12	2.7416	4.1639	1.94715	1.80933	1.50996	1.81213	1.72763	2.13699	1.95941	2.07565	0.907609	0.489209	0.264493	0.972628	0.362657	1.51955	2.17115
	13	2.32568	2.1807	1.58704	1.17137	1.42857	1.65743	2.29981	2.21387	1.93967	1.61733	0.970856	0.420765	1.2261	0.886029	0.957798
	14		1.65988	1.23529	1.01215	1.37525	1.67203	1.92578	2.36295	1.78623	1.1119	0.642336	0.794495	1.97794
	15			1.32041	1.25407	1.59146	2.45842	2.23866	2.05849	1.39427	0.820106	0.773381	1.04833	0.847015
	16				1.70791	1.87018	2	1.86873	1.59016	0.767025	0.627451	0.976364	1.56852	3.13774
	17					1.70238	1.42857	1.77247	1.7636	0.904847	1.97628	1.60037	1.98516	2.90711
7	1					1.98039	1.3092	0.923828	1.58721	1.22543	1.5	1.29596	1.93613	2.45304					7																		7
	2				1.36653	1.57058	1.50197	1.91373	1.08755	0.675522	1.23364	0.781818	0.264865	0.947653	1.68535
	3			2.26104	1.64741	1.77932	1.99006	1.89922	1.68522	1.76923	1.30241	0.893116	0.249551	0.906306	0.763964	0.360862
	4		2.60243	1.95316	1.36926	1.50996	2.31225	2.02959	2.07514	1.94455	1.58965	1.20036	0.673285	1.10252	0.548561	0.331541	0.32554
	5	2.00203	1.98788	1.23896	1.24048	1.45219	1.954	2.224	2.78107	1.96053	1.58716	2.04762	1.11797	0.925	0.55914	0.416517	0.11449	0.209677
	6	2.19877	1.40081	0.850806	1.16734	1.02823	1.48178	2.2101	2.39761	1.97373	1.39154	0.739209	0.308797	0.827957	0.38968	0.357782	0.0951526	0.05386
	7	2.33196	1.46856	1.04057	0.997976	0.855984	0.862348	1.38508	2.17576	1.88931	1.53618	1.38798	0.974865	0.434705	0.087344	0.309481	0.114695	0.190305
	8	2.47401	2.11499	1.17587	0.9	0.713996	0.894737	1.08468	1.91296	2.03647	1.49168	0.978339	1.53069	0.789189	0.277778	0.497297	3.39961	0.545946
	9	2.68125	2.21694	1.64549		0.522358	0.746964	1.19636	1.83636	2.16667		1.01982	0.84058	0.830018	0.461261	0.377698	0.740072	1.04874
	10	2.74841	2.72842	2.07231	1.22718	1.25101	1	1.46371	1.45473	1.94531		1.14706	0.498201	0.43964	0.296029	0.228007	1.05292	1.58487
	11	2.76793	2.55106	1.77801	1.69043	1.72745	1.19162	1.85141	1.80282	2.4261	2.2037	1.02569	0.586643	0.377698	0.286988	0.34296	1.08545	1.72264
	12	2.54777	4.09853	1.99379	1.7623	1.32329	1.55754	1.48915	1.9332	1.86064	2.00911	0.992701	0.51083	0.26297	1.02399	0.36528	1.43542	2.05416
	13	2.46947	2.21622	1.68571	1.16734	1.4	1.45149	2.03168	2.22631	1.92463	1.59049	1.07482	0.363309	1.28519	0.814208	0.889908
	14		1.82582	1.32238	1.01423	1.44919	1.67742	1.81151	2.27238	1.82537	1.16757	0.680431	0.926606	1.80556
	15			1.36456	1.34077	1.72449	2.43927	2.35729	2.15	1.47406	0.92973	0.915009	1.10566	0.889943
	16				1.83806	1.98371	2.10119	1.96743	1.7477	0.799645	0.611702	0.998175	1.67412	3.22929
	17					1.76096	1.43907	1.70986	1.80187	0.900722	1.84135	1.55037	2.02264	2.86318
8	1					1.86508	1.44841	0.86785	1.61024	1.29961	1.57714	1.32182	1.86131	2.37201					8																		8
	2				1.53213	1.65669	1.64414	1.95418	1.09412	0.765835	1.24053	0.787273	0.264758	0.879713	1.76173
0.00738342	3			2.41247	1.678	1.672	1.90079	1.85941	1.66341	1.75236	1.29981	0.885246	0.259459	0.877256	0.725	0.368515
	4		2.6498	1.8833	1.44689	1.41916	2.17097	1.82411	2.11111	1.98513	1.54745	1.00544	0.617754	1.06306	0.557143	0.375	0.281362
	5	2.23878	1.79042	1.26908	1.18072	1.54	1.76892	1.97189	2.55058	2.10148	1.65399	2.1045	1.12903	0.879928	0.573214	0.400716	0.109712	0.204668
	6	2.29039	1.46787	0.829317	1.22222	1.03012	1.34205	2.08283	2.27689	2.00739	1.55393	0.674377	0.369449	0.838366	0.474336	0.428315	0.0892857	0.0771993
	7	2.28049	1.50403	1.03427	1.09476	0.748479	0.826263	1.45325	2.16335	2.12082	1.67772	1.48313	0.960924	0.45975	0.115248	0.336918	0.122995	0.205725
	8	2.53388	2.29184	1.31984	0.979633	0.674089	1.03245	1.15462	1.96614	2.17041	1.69429	1.08065	1.66906	0.842011	0.302491	0.508021	3.48833	0.584229
	9	2.95218	2.55072	1.79303		0.50101	0.782696	1.37924	2.09	2.30385		1.02693	0.727758	0.800712	0.526978	0.41637	0.771171	1.15971
	10	2.70954	2.84025	2.27893	1.29293	1.38554	1.13917	1.62	1.57624	2.01553		1.06643	0.505319	0.417857	0.314848	0.264758	1.09712	1.69944
	11	2.84342	2.81211	1.90644	1.78226	1.87475	1.37328	1.99006	2.02574	2.72467	2.25783	0.933453	0.553571	0.286988	0.302867	0.335727	1.12973	1.85227
	12	2.68125	4.21355	2.06748	1.77355	1.43825	1.60118	1.50289	2.26796	2.09541	2.05331	0.982079	0.513417	0.201077	0.913357	0.396022	1.5064	2.16763
	13	2.46473	2.31762	1.71717	1.19124	1.396	1.56522	2.22481	2.25427	1.94075	1.63768	1.02496	0.359571	1.1694	0.768116	0.903636
	14		1.8664	1.31124	1.08687	1.37374	1.68474	2.01779	2.19318	1.8068	1.12724	0.624779	0.833942	1.83643
	15			1.39148	1.36419	1.8101	2.67944	2.38462	2.15341	1.48763	0.943262	0.840502	1.0729	0.781544
	16				1.84369	2.07631	2.26667	2.05682	1.63273	0.805996	0.695575	1.06691	1.60734	3.14071
	17					1.88095	1.49904	1.8187	1.75373	0.753597	1.86964	1.56593	2.01103	2.92857
9	1					2.048	1.39406	0.788845	1.64752	1.222	1.52975	1.0948	1.69832	2.31099					9																		9
	2				1.53187	1.59562	1.54618	1.932	0.990079	0.768786	1.40421	0.810409	0.268877	0.864717	1.63553
0.00705682	3			2.47485	1.738	1.78088	2.03992	1.79604	1.60861	1.77863	1.29511	0.852886	0.28281	0.845588	0.714545	0.306859
	4		2.62933	2.07258	1.49301	1.5498	2.29622	1.97222	2.03755	2.01521	1.54511	1.04842	0.672161	1.09559	0.60367	0.334539	0.278182
	5	2.17623	1.98167	1.32329	1.31048	1.63473	2.04591	2.25253	2.55929	2.01524	1.56157	2.08656	1.15	0.908425	0.573237	0.389892	0.115523	0.186257
	6	2.28807	1.54326	1.03239	1.24187	1.10345	1.5	2.27163	2.41118	2.02462	1.34572	0.726449	0.327899	0.887067	0.418773	0.405455	0.0936937	0.0486486
	7	2.40909	1.75051	1.12903	1.07302	0.788187	0.987805	1.47887	2.16899	2.14367	1.56343	1.46533	0.961887	0.481818	0.177215	0.29529	0.145191	0.207581
	8	2.48548	2.26955	1.24948	1.04481	0.734818	0.892495	1.11847	1.85571	2.09924	1.55659	1.08197	1.65876	0.816216	0.356115	0.477396	3.35098	0.588448
	9	2.95798	2.58159	1.75464		0.511202	0.740443	1.28858	1.73092	2.16409		1.06364	0.873188	0.917415	0.51259	0.388788	0.813869	1.12797
	10	2.69247	2.73069	2.1639	1.24286	1.11224	1.0481	1.50701	1.46016	1.98039		1.18864	0.538879	0.413547	0.332727	0.349091	1.15174	1.70787
	11	2.81132	2.71667	1.77547	1.56674	1.72414	1.30522	1.9521	1.91383	2.58221	2.35993	1.0789	0.519713	0.383929	0.303085	0.326047	1.17883	1.89504
	12	2.77292	3.96888	1.81481	1.53783	1.17039	1.434	1.46548	2.02772	2	2.06422	1.0696	0.525939	0.234657	0.894444	0.379121	1.50185	2.07184
	13	2.37967	2.10082	1.55441	1.1446	1.22828	1.332	2.02778	2.24219	1.92435	1.57143	0.915162	0.390991	1.20734	0.801835	0.944954
	14		1.77505	1.23108	0.985714	1.29363	1.70541	2.09054	2.17466	1.87751	1.06691	0.583184	0.809174	1.90909
	15			1.31893	1.40164	1.82787	2.56263	2.48687	2.10476	1.4991	0.856373	0.816697	0.998141	0.69145
	16				1.79671	1.97143	2.06237	1.98249	1.63284	0.858676	0.645161	0.905626	1.56797	3.2218
	17					1.72946	1.4451	1.83527	1.87238	0.846995	1.82202	1.49265	1.90406	2.90581
10	1					2.03	1.34059	0.94902	1.67773	1.16471	1.59393	1.22404	1.70018	2.32902					10																		10
	2				1.51111	1.56539	1.486	1.96614	1.12329	0.741379	1.28788	0.90146	0.238779	0.978456	1.7573
0.715197	3			2.21589	1.5332	1.75502	2.04217	1.90533	1.69826	1.83774	1.39626	0.921533	0.263914	0.824057	0.755877	0.385996
	4		2.58367	1.8583	1.35223	1.52305	2.18712	1.86974	2.09922	1.99814	1.54679	1.06387	0.740143	1.11849	0.573477	0.398927	0.320072
	5	2.01848	1.90224	1.29352	1.11268	1.46881	1.79678	2.10262	2.48532	2.03166	1.47253	2.04918	1.09386	0.894265	0.507117	0.45	0.105169	0.166667
	6	2.14583	1.30832	0.868154	1.18145	1.04646	1.30972	2.0142	2.35714	2.00375	1.35701	0.557143	0.277281	0.832442	0.302491	0.383929	0.0819964	0.059034
	7	2.1473	1.5723	1.11179	1.01417	0.827935	0.861789	1.38384	2.07784	2.01695	1.49631	1.33877	1.00542	0.373665	0.117438	0.261101	0.12656	0.155914
	8	2.47579	2.27329	1.27846	0.931034	0.734818	0.973684	1.02222	1.84553	1.93928	1.65736	0.992832	1.49101	0.712747	0.268683	0.388988	3.37573	0.58018
	9	2.83054	2.5	1.79713		0.463563	0.673347	1.18675	1.78873	2.14012		1.01436	0.84767	0.852313	0.488414	0.300537	0.729391	1.01986
	10	2.70417	2.77615	2.25934	1.27105	1.25911	0.943775	1.48104	1.52	2.04457		1.11151	0.456835	0.394643	0.287744	0.233929	0.982143	1.54296
	11	2.88494	2.62395	1.8682	1.68507	1.85516	1.38264	2.06349	1.9703	2.59345	2.14862	0.871609	0.500898	0.298748	0.253119	0.284946	1.06667	1.79362
	12	2.67857	3.97095	1.82787	1.6565	1.33134	1.58398	1.62089	2.12062	1.89444	1.81395	0.902351	0.443447	0.230216	0.825455	0.315217	1.40876	2.05019
	13	2.25466	2.04959	1.60446	1.12224	1.35	1.45957	2.19498	2.20983	1.65108	1.3705	0.891501	0.351786	1.11679	0.76951	0.840951
	14		1.70816	1.24341	0.97561	1.32193	1.76	1.76562	2.0316	1.49016	0.912343	0.527828	0.727273	1.61878
	15			1.34413	1.31452	1.80483	2.44024	2.21415	1.89434	1.33453	0.810714	0.843243	1.02041	0.698502
	16				1.92929	2.12625	2.0039	1.92571	1.59926	0.791367	0.620567	0.947368	1.53148	3.23729
	17					1.80473	1.4	1.83397	1.7646	0.758123	1.68468	1.51017	1.92022	2.87305

## Sheet: CV
MeanVelocity
Signals of insufficient quality were excluded from the property maps. Signals could be rejected based on noise low amplitude, large artefact or ventricluar farfields that could not be substracted.
		1	2	3	4	5	6	7	8	9	10	11	12	13	14	15	16	17
1	1					0.96398	0.817096	0.721752	0.670891	0.653083	0.676755	0.78817	0.815881	0.848959					1																		1
	2				1.21987	1.18216	0.955524	0.854035	0.732767	0.778147	0.697642	0.800648	0.810174	0.826209	0.802793
0.0065442	3			1.01701	1.24294	1.17682	1.04615	0.872531	0.789647	0.787152	0.731997	0.834613	0.830303	0.841077	0.801358	0.826306
	4		0.924228	0.944923	0.910654	0.873357	0.904817	0.836827	0.839089	0.797591	0.767667	0.784482	0.81128	0.834867	0.808326	0.84671	0.87439
	5	1.17802	0.982105	0.875097	0.800495	0.72936	0.750069	0.775699	0.825052	0.780821	0.737485	0.762674	0.822422	0.844316	0.816197	0.880414	0.857221	0.918795
	6	1.16392	0.921063	0.853608	0.766918	0.67739	0.655655	0.7003	0.744384	0.774025	0.776768	0.739353	0.787149	0.818199	0.872554	0.870696	0.85673	0.922511
	7	1.07626	0.911978	0.803337	0.735068	0.660404	0.650783	0.629772	0.743625	0.748747	0.757385	0.752589	0.785314	0.768259	0.788794	0.893481	0.910809	0.929252
	8	1.0485	0.948323	0.748283	0.71855	0.626326	0.693323	0.651771	0.756871	0.725704	0.711849	0.698604	0.781932	0.814914	0.853155	0.940949	0.9398	1.01134
	9	0.971892	0.939374	0.741838		0.648706	0.689851	0.681691	0.710758	0.723464	0.72012	0.706816	0.727502	0.820896	0.942227	1.01938	1.10754	1.16861
	10	0.878108	0.851553	0.800382	0.67534	0.62557	0.626591	0.659261	0.688706	0.728283	0.712211	0.707002	0.713563	0.787792	0.940696	1.04184	1.19895	1.37564
	11	0.936958	0.853006	0.749725	0.654395	0.635747	0.662518	0.674816	0.726155	0.731088	0.732559	0.765287	0.739148	0.769238	0.850025	0.952129	1.09759	1.40713
	12	1.01146	1.01605	0.910986	0.842545	0.757733	0.718121	0.68996	0.710699	0.719867	0.733863	0.708868	0.732642	0.762292	0.84264	0.928335	1.06879	1.40013
	13	1.29613	1.12011	1.08891	0.947416	0.837933	0.752731	0.70998	0.800148	0.748722	0.737849	0.682773	0.696266	0.706806	0.767228	0.832944
	14		1.16921	1.08377	0.900621	0.793337	0.729007	0.689407	0.751248	0.799419	0.730454	0.72516	0.717264	0.719023
	15			1.04689	0.902321	0.817377	0.771703	0.795485	0.811168	0.816878	0.782665	0.788254	0.838119	0.819624
	16				0.859132	0.754895	0.784589	0.757853	0.757728	0.749573	0.752278	0.838781	0.884912	0.857436
	17					0.803011	0.755985	0.798921	0.761564	0.723351	0.822078	0.988943	1.06507	1.06416
2	1					0.893857	0.774248	0.700631	0.616266	0.537674	0.576717	0.676163	0.800883	0.870537					2																		2
	2				0.982417	1.01947	0.850388	0.778733	0.657323	0.596406	0.62088	0.711921	0.736103	0.784872	0.814024
0.00878726	3			1.02212	1.03814	1.02664	0.95385	0.787478	0.703458	0.644497	0.67751	0.700602	0.699881	0.781782	0.800771	0.800608
	4		0.934287	0.970739	0.877116	0.903817	0.946088	0.827387	0.746189	0.653283	0.622705	0.643293	0.70687	0.772342	0.747203	0.787336	0.77742
	5	1.12936	0.923763	0.859761	0.790234	0.792653	0.769995	0.830514	0.761186	0.717071	0.697266	0.659552	0.709746	0.729422	0.791802	0.816061	0.798514	0.918983
	6	1.14212	0.986552	0.890539	0.785188	0.721236	0.689805	0.730685	0.785749	0.758439	0.712872	0.683777	0.673868	0.714993	0.742196	0.799046	0.805269	0.934087
	7	1.15875	0.93982	0.828967	0.76204	0.673303	0.643309	0.660067	0.747229	0.767079	0.763944	0.706519	0.752828	0.767207	0.712552	0.80253	0.849788	0.904246
	8	1.01431	0.901516	0.776272	0.681059	0.630792	0.627858	0.629275	0.706157	0.653171	0.65676	0.699117	0.771576	0.822677	0.799813	0.844265	0.790172	0.956787
	9	1.05602	0.962215	0.777796		0.636916	0.671736	0.679859	0.666144	0.674315	0.645166	0.668006	0.73233	0.798223	0.903552	0.91998	1.00874	1.05836
	10	0.919655	0.923876	0.850564	0.726722	0.6509	0.650663	0.674083	0.650701	0.669928	0.673393	0.69801	0.745201	0.795527	0.907641	0.991135	1.12631	1.24492
	11	1.00172	0.95881	0.840278	0.75577	0.692147	0.654957	0.709988	0.722509	0.668214	0.703828	0.737556	0.748107	0.770016	0.816948	0.969521	1.06545	1.25229
	12	1.11597	1.02722	0.924163	0.824394	0.792937	0.706673	0.659971	0.69413	0.700942	0.70866	0.701189	0.703741	0.712787	0.854361	0.931285	1.09349	1.32773
	13	1.35654	1.11433	1.0731	0.929198	0.864043	0.740723	0.665398	0.721488	0.758541	0.756155	0.667746	0.634546	0.689085	0.782212	0.890862
	14		1.08956	1.04301	0.908958	0.780515	0.654844	0.598875	0.730368	0.801646	0.757725	0.669766	0.673506	0.701544
	15			1.07685	0.878371	0.798077	0.690485	0.725333	0.754515	0.749515	0.753833	0.756962	0.752146	0.751668
	16				0.893511	0.76056	0.741993	0.698789	0.678251	0.704246	0.739418	0.746209	0.787774	0.823629
	17					0.808593	0.749269	0.715323	0.712887	0.66672	0.773676	0.892209	0.982254	1.01821
3	1					0.832908	0.717298	0.636434	0.607379	0.570044	0.62769	0.716968	0.824694	0.84108					3																		3
	2				1.06291	1.01168	0.813674	0.723282	0.680524	0.626409	0.70408	0.751909	0.802052	0.834184	0.839779
0.0073441	3			0.911034	1.00538	0.97712	0.928456	0.825861	0.747849	0.666331	0.731308	0.756847	0.772075	0.817569	0.777057	0.766076
	4		0.903475	0.870353	0.851123	0.806968	0.860534	0.847137	0.824717	0.704645	0.682357	0.677311	0.706997	0.752596	0.761297	0.782714	0.795725
	5	1.00953	0.887749	0.806818	0.782774	0.7279	0.778537	0.858731	0.837473	0.731433	0.710823	0.66495	0.735003	0.786056	0.765316	0.808791	0.792412	0.846303
	6	1.1399	0.936294	0.853873	0.727444	0.658343	0.665192	0.694704	0.803143	0.795198	0.739578	0.67497	0.689189	0.744433	0.773501	0.805129	0.825466	0.915387
	7	1.13827	0.927924	0.834336	0.711993	0.651355	0.659194	0.644506	0.747381	0.701731	0.777117	0.734807	0.726859	0.772874	0.77469	0.846143	0.871339	0.949767
	8	1.12975	0.937157	0.82973	0.711296	0.639404	0.641582	0.614084	0.702262	0.675041	0.678081	0.703946	0.740785	0.818112	0.825889	0.876873	0.819967	0.99678
	9	1.097	0.996877	0.810448		0.637009	0.663972	0.645026	0.668549	0.677288	0.689695	0.674117	0.756028	0.828072	0.899917	1.02564	1.09547	1.13823
	10	0.996055	1.02073	0.825024	0.709679	0.637239	0.63667	0.627913	0.635798	0.637091	0.705502	0.750403	0.813167	0.85219	0.955108	1.09394	1.2394	1.44165
	11	1.01629	0.916218	0.817743	0.767528	0.713534	0.664547	0.653196	0.677591	0.662313	0.74938	0.749049	0.807122	0.793335	0.849495	0.990423	1.13041	1.43622
	12	1.16089	1.05653	0.973536	0.863167	0.81105	0.712508	0.677547	0.716252	0.723368	0.756049	0.755246	0.748472	0.728389	0.844407	0.919431	1.08892	1.45966
	13	1.41419	1.13096	1.04133	0.915201	0.866418	0.754872	0.709192	0.771652	0.785046	0.793585	0.699972	0.662928	0.686538	0.804792	0.864108
	14		1.10701	1.04473	0.901049	0.822446	0.738409	0.647925	0.73392	0.816631	0.823763	0.724682	0.737501	0.708071
	15			0.986572	0.880686	0.812473	0.82046	0.728313	0.769993	0.820946	0.797365	0.819891	0.816297	0.777275
	16				0.87189	0.801671	0.736636	0.690682	0.72259	0.759952	0.781087	0.833925	0.863087	0.832683
	17					0.819956	0.748074	0.758286	0.764825	0.688227	0.794893	0.96877	1.11255	1.06184
4	1					0.833151	0.699067	0.635313	0.626054	0.567765	0.628433	0.711189	0.779662	0.789384					4																		4
	2				1.07672	0.998281	0.843916	0.749365	0.69736	0.658144	0.66465	0.721425	0.757612	0.77726	0.831193
0.00676019	3			0.94413	1.07653	1.05395	0.937427	0.800291	0.707089	0.689857	0.722393	0.741825	0.756956	0.792281	0.794118	0.829233
	4		0.935948	0.899657	0.913107	0.905297	0.877553	0.820578	0.788337	0.720901	0.733641	0.756396	0.768133	0.780193	0.783968	0.879539	0.886255
	5	1.05756	0.942374	0.846547	0.803913	0.765641	0.744732	0.731324	0.768935	0.749956	0.7261	0.728354	0.748107	0.796749	0.815221	0.868737	0.895023	1.02334
	6	1.17606	0.98275	0.84415	0.729339	0.659203	0.671954	0.652911	0.725819	0.75719	0.765949	0.735992	0.755965	0.767373	0.787023	0.872549	0.916644	1.03368
	7	1.12494	0.938129	0.799592	0.699054	0.648448	0.618524	0.664747	0.721804	0.703949	0.715387	0.738801	0.771516	0.777845	0.837512	0.928809	1.00056	1.08979
	8	1.00333	0.865371	0.719487	0.657054	0.604999	0.641942	0.620244	0.687514	0.674983	0.685871	0.693497	0.740447	0.792142	0.844977	0.999989	1.01417	1.16182
	9	0.917165	0.858593	0.725372		0.61489	0.647274	0.644157	0.643846	0.683901	0.696239	0.682321	0.713085	0.793446	0.891773	1.00771	1.13756	1.2295
	10	0.930286	0.848888	0.712426	0.638849	0.602521	0.662971	0.649777	0.64354	0.623575	0.710822	0.680987	0.780607	0.81688	0.880497	1.06764	1.19438	1.36923
	11	0.90835	0.927258	0.790558	0.70869	0.671773	0.708617	0.687851	0.686472	0.687712	0.718325	0.721017	0.752498	0.785148	0.84556	0.945627	1.07999	1.33743
	12	1.02898	0.957098	0.899955	0.837268	0.768691	0.723426	0.696771	0.740127	0.683896	0.730245	0.698173	0.71781	0.708528	0.81696	0.905422	1.00904	1.3523
	13	1.32489	1.1276	1.05376	0.935207	0.822016	0.737121	0.678635	0.742441	0.724158	0.738124	0.679831	0.642287	0.620339	0.727959	0.808426
	14		1.11022	1.06754	0.932163	0.812098	0.701891	0.680281	0.767816	0.786237	0.768992	0.669123	0.669419	0.697444
	15			1.12567	0.912742	0.818996	0.777147	0.784825	0.804185	0.794719	0.776063	0.733585	0.765865	0.743518
	16				0.959205	0.833956	0.840017	0.741914	0.724174	0.716916	0.731256	0.766848	0.818635	0.843577
	17					0.859263	0.788402	0.756751	0.738716	0.668126	0.817235	0.961998	1.09525	1.0827
5	1					0.874977	0.742898	0.70826	0.600028	0.56712	0.612511	0.715513	0.743679	0.819469					5																		5
	2				1.07832	1.05114	0.858068	0.781622	0.658761	0.654321	0.660011	0.731499	0.73894	0.786215	0.770594
0.00676127	3			1.0106	1.15669	1.10241	0.961876	0.833699	0.716715	0.68329	0.720973	0.737353	0.723458	0.759497	0.785642	0.864978
	4		0.94326	0.938068	0.933876	0.923514	0.906207	0.851112	0.769929	0.682157	0.726966	0.710583	0.724843	0.750985	0.78293	0.855103	0.89544
	5	1.08104	0.949511	0.901722	0.82142	0.77682	0.762919	0.819128	0.830284	0.753443	0.728011	0.705117	0.757367	0.752101	0.79383	0.859463	0.881923	1.00245
	6	1.15454	0.941415	0.914846	0.776587	0.667586	0.641918	0.673666	0.750427	0.736752	0.72853	0.712338	0.763022	0.762588	0.830242	0.884607	0.866792	0.992707
	7	1.16956	1.02068	0.90085	0.713017	0.656927	0.658103	0.650096	0.71597	0.693206	0.754326	0.755873	0.759128	0.725675	0.772977	0.856796	0.914426	1.03171
	8	1.10733	0.979791	0.814793	0.670215	0.629246	0.657979	0.643386	0.675859	0.65386	0.73051	0.746976	0.773532	0.783661	0.792889	0.901326	0.93619	1.05441
	9	1.0609	0.928135	0.829258		0.662683	0.679913	0.751192	0.660807	0.64924	0.680973	0.717995	0.776938	0.852162	0.933117	1.01423	1.11082	1.18579
	10	1.0025	0.994795	0.779624	0.676435	0.663789	0.670245	0.690412	0.683648	0.670896	0.647408	0.678647	0.790869	0.824649	0.934231	1.02964	1.22403	1.3679
	11	1.00812	0.914847	0.799256	0.765701	0.704976	0.701759	0.708244	0.683891	0.709936	0.692309	0.712967	0.747817	0.760657	0.827088	1.00921	1.14762	1.41955
	12	0.977967	0.997657	0.889157	0.837231	0.72317	0.658226	0.635019	0.70504	0.681325	0.633608	0.656243	0.712172	0.709294	0.831604	0.916889	1.07701	1.3472
	13	1.23699	1.08636	0.971583	0.853142	0.824364	0.728116	0.655339	0.725635	0.717349	0.678011	0.645447	0.634107	0.64771	0.752446	0.885335
	14		1.15127	1.08536	0.88324	0.789578	0.721369	0.665145	0.743119	0.799983	0.756288	0.708375	0.6788	0.656198
	15			1.06866	0.892027	0.832049	0.791281	0.810627	0.790558	0.750862	0.78545	0.770294	0.731415	0.729406
	16				0.893241	0.812265	0.773201	0.75891	0.760262	0.73542	0.751437	0.804123	0.800548	0.785635
	17					0.849229	0.760093	0.781919	0.786818	0.706236	0.800021	0.981237	1.09083	1.03157
6	1					0.844436	0.716492	0.637486	0.595828	0.584043	0.635735	0.749233	0.817676	0.860308					6																		6
	2				1.12086	1.03791	0.818452	0.727077	0.649603	0.638541	0.673649	0.707953	0.744449	0.748413	0.792939
0.00692531	3			0.940957	1.09686	1.07652	0.935187	0.764117	0.720028	0.69587	0.688171	0.704081	0.735752	0.755072	0.767761	0.809909
	4		0.977902	0.949044	0.858787	0.88812	0.895345	0.792808	0.773947	0.732723	0.698182	0.701026	0.724351	0.763343	0.779347	0.851857	0.905775
	5	1.02509	0.922617	0.847063	0.79714	0.774374	0.798863	0.758567	0.735687	0.768025	0.70438	0.722988	0.76209	0.798452	0.802236	0.90211	0.900706	1.01354
	6	1.05542	0.926158	0.860408	0.748863	0.691184	0.659907	0.633705	0.748063	0.741423	0.745893	0.749403	0.702367	0.781056	0.802748	0.861729	0.882952	0.992457
	7	1.07561	0.903062	0.817708	0.735057	0.655672	0.623729	0.629285	0.709083	0.717361	0.727552	0.725688	0.769108	0.752318	0.762766	0.915654	0.952643	1.02505
	8	1.03003	0.860205	0.774246	0.665838	0.596238	0.62868	0.611728	0.674278	0.678657	0.696946	0.700105	0.774037	0.795233	0.808411	0.998499	0.828006	1.08039
	9	1.06451	0.944727	0.749216		0.610814	0.62615	0.635638	0.64542	0.651803	0.681026	0.700195	0.758231	0.87119	0.908302	1.04882	1.16834	1.19348
	10	0.94662	0.911391	0.749859	0.640119	0.606646	0.624293	0.591155	0.631223	0.659784	0.72267	0.71889	0.788779	0.898536	0.957323	1.107	1.26861	1.40418
	11	0.940394	0.834527	0.761014	0.689158	0.664235	0.625543	0.627165	0.644063	0.681382	0.718943	0.763044	0.769314	0.799938	0.861247	1.03105	1.13842	1.54433
	12	1.08797	1.03707	0.915991	0.885671	0.786426	0.649133	0.655332	0.6716	0.714556	0.732664	0.727403	0.751027	0.755598	0.837537	0.951777	1.15079	1.52246
	13	1.27314	1.17062	1.14911	0.957723	0.811913	0.751034	0.660642	0.731501	0.781079	0.709465	0.667063	0.690503	0.683119	0.77915	0.875902
	14		1.13488	1.05093	0.950169	0.795162	0.700418	0.652507	0.749494	0.760808	0.744523	0.726115	0.710971	0.703519
	15			1.05957	0.907725	0.810277	0.755002	0.738154	0.729307	0.763425	0.774736	0.787492	0.792203	0.75682
	16				0.905385	0.823677	0.806424	0.732097	0.690532	0.721213	0.74474	0.81925	0.82057	0.825145
	17					0.826447	0.803314	0.784514	0.814139	0.711609	0.801013	1.01049	1.09444	1.07157
7	1					0.79868	0.690097	0.634465	0.601727	0.577655	0.626074	0.712357	0.809774	0.873982					7																		7
	2				0.971955	0.909624	0.817535	0.70683	0.610139	0.62207	0.668736	0.771416	0.757314	0.816339	0.85048
	3			0.923148	1.04321	0.993617	0.89668	0.727251	0.671075	0.681551	0.674433	0.722457	0.730467	0.827766	0.812352	0.802892
	4		0.935603	0.92588	0.868175	0.856836	0.861314	0.795707	0.760547	0.688147	0.738975	0.711152	0.718773	0.781655	0.77994	0.778434	0.849605
	5	1.11307	0.923164	0.845692	0.757014	0.74118	0.724328	0.799977	0.780376	0.734517	0.702785	0.718067	0.743362	0.799565	0.764596	0.790461	0.855646	0.938903
	6	1.13748	0.90839	0.798188	0.716487	0.63318	0.651195	0.703584	0.755373	0.739411	0.765269	0.744474	0.733978	0.760322	0.773355	0.837865	0.84224	0.931773
	7	1.1289	0.845337	0.786648	0.661611	0.641895	0.647615	0.670637	0.719583	0.696901	0.759337	0.774823	0.79712	0.751077	0.790672	0.85658	0.886365	0.934509
	8	1.04824	0.866957	0.726287	0.64765	0.653172	0.667762	0.650667	0.683614	0.700704	0.731781	0.756498	0.764652	0.747882	0.837065	0.937851	0.876311	1.04092
	9	1.07802	0.945246	0.765066		0.673265	0.690985	0.715448	0.707937	0.671138	0.679328	0.738367	0.761804	0.824637	0.907373	0.960542	1.07417	1.12717
	10	1.01242	0.987523	0.776261	0.674702	0.641085	0.704966	0.709534	0.718537	0.693651	0.735308	0.713488	0.796013	0.824835	0.904103	1.03346	1.20934	1.36806
	11	1.08507	1.05104	0.813591	0.75069	0.699355	0.734627	0.747554	0.740883	0.739134	0.704966	0.725868	0.748041	0.742223	0.842486	0.9292	1.07198	1.4521
	12	1.10036	1.07805	0.969934	0.925017	0.762789	0.753236	0.721689	0.749455	0.7339	0.696709	0.721706	0.742893	0.689664	0.780102	0.872989	1.01694	1.3994
	13	1.31418	1.10599	1.08064	0.956152	0.908602	0.824579	0.738	0.834399	0.79862	0.767237	0.70419	0.63751	0.646153	0.74984	0.846722
	14		1.13238	1.01592	0.871337	0.780363	0.760933	0.701151	0.806772	0.819045	0.806448	0.745873	0.69782	0.67822
	15			0.958584	0.846556	0.767319	0.741035	0.774389	0.76718	0.743579	0.796475	0.770467	0.793857	0.741876
	16				0.833288	0.776471	0.76054	0.733786	0.718038	0.70042	0.756272	0.787467	0.831371	0.819552
	17					0.866315	0.826861	0.815604	0.764022	0.678187	0.753319	0.916436	1.01326	1.02835
8	1					0.820689	0.754485	0.647003	0.643128	0.608544	0.61513	0.722523	0.791361	0.838818					8																		8
	2				1.0071	0.977766	0.856665	0.748759	0.67999	0.651818	0.68671	0.732856	0.77359	0.829464	0.766673
0.00738342	3			0.923153	0.948201	0.940955	0.935193	0.825261	0.749702	0.695716	0.738828	0.753299	0.775438	0.801781	0.783462	0.776436
	4		0.932046	0.929006	0.822444	0.834098	0.883048	0.780622	0.786283	0.711947	0.68938	0.717458	0.755136	0.803208	0.761603	0.786338	0.850384
	5	1.15615	0.988931	0.913572	0.79811	0.768626	0.781858	0.76452	0.788477	0.702238	0.649761	0.706715	0.786553	0.76626	0.763032	0.828211	0.831253	1.00176
	6	1.16835	0.993337	0.886649	0.790583	0.690134	0.715574	0.743185	0.737539	0.743971	0.731326	0.744078	0.753836	0.781611	0.805169	0.832708	0.816288	0.958128
	7	1.14129	0.980396	0.87348	0.757179	0.669219	0.705552	0.65562	0.739733	0.712276	0.736974	0.747599	0.785509	0.731152	0.731469	0.795332	0.843329	0.980641
	8	1.11994	0.951066	0.839383	0.717725	0.700998	0.676157	0.685747	0.696992	0.677675	0.721834	0.709656	0.793504	0.796942	0.78002	0.877529	0.841904	1.05978
	9	1.11465	1.03519	0.851748		0.711206	0.691934	0.656446	0.671646	0.659786	0.72449	0.755433	0.782975	0.785719	0.812346	0.942438	1.01128	1.09036
	10	0.947034	0.947485	0.802418	0.736267	0.66836	0.66106	0.697827	0.648971	0.637276	0.748115	0.764318	0.807077	0.798825	0.857864	1.00457	1.19454	1.30222
	11	0.959747	0.897031	0.816098	0.735664	0.690427	0.664658	0.652489	0.663529	0.698803	0.731872	0.75469	0.755317	0.753997	0.817094	0.955364	1.08205	1.30301
	12	1.05115	1.01522	0.893579	0.849626	0.768659	0.716492	0.652546	0.723466	0.705745	0.731614	0.693729	0.721019	0.725285	0.810768	0.901004	1.03082	1.34792
	13	1.24482	1.07882	1.01643	0.915345	0.862131	0.797742	0.710635	0.722135	0.765162	0.720128	0.657582	0.659685	0.662383	0.732041	0.846933
	14		1.14742	1.06031	0.935753	0.865277	0.782537	0.674459	0.734256	0.762846	0.730594	0.725566	0.676902	0.679452
	15			1.06967	0.927405	0.854428	0.811421	0.781455	0.739074	0.762652	0.721832	0.778462	0.780743	0.759613
	16				0.957187	0.845083	0.825984	0.749197	0.719367	0.737731	0.711987	0.783149	0.794528	0.766285
	17					0.905126	0.795733	0.822959	0.744894	0.692092	0.780322	0.927389	0.9663	0.976577
9	1					0.797097	0.715834	0.617619	0.601693	0.58402	0.625772	0.710064	0.823956	0.846392					9																		9
	2				0.934587	0.856572	0.783062	0.715628	0.6469	0.649766	0.655989	0.724615	0.807498	0.809687	0.819151
0.00705682	3			0.980399	0.933664	1.00548	0.82474	0.748993	0.677827	0.648074	0.718871	0.718144	0.768982	0.782778	0.805064	0.818782
	4		0.984026	0.944171	0.881908	0.827574	0.899042	0.844335	0.723673	0.68327	0.71668	0.746178	0.777674	0.791094	0.814161	0.873171	0.868247
	5	1.1241	0.933201	0.878244	0.786327	0.79061	0.743699	0.762129	0.744603	0.732708	0.759136	0.732038	0.772978	0.801649	0.865962	0.892403	0.896918	1.00168
	6	1.22473	0.989814	0.8861	0.79198	0.755373	0.699727	0.697618	0.759667	0.762256	0.764445	0.728423	0.715849	0.756028	0.806534	0.840802	0.862849	0.991016
	7	1.23543	0.956088	0.874175	0.774923	0.693464	0.644669	0.64786	0.709512	0.748061	0.748309	0.729189	0.75905	0.758351	0.804067	0.865558	0.890283	0.97278
	8	1.19393	0.996838	0.846242	0.709101	0.670599	0.65472	0.647086	0.711039	0.731777	0.736983	0.729435	0.794392	0.833953	0.865913	0.959132	0.88148	1.0354
	9	1.02393	0.990446	0.799888		0.673201	0.653511	0.660901	0.668996	0.67184	0.672251	0.663949	0.729146	0.846999	0.935862	0.996882	1.04783	1.12172
	10	1.02835	0.948947	0.811505	0.71235	0.687786	0.687085	0.665824	0.663314	0.649287	0.688361	0.692938	0.721587	0.808418	0.959231	1.06881	1.20912	1.35684
	11	1.09911	1.03613	0.852436	0.740834	0.681216	0.682738	0.665073	0.675919	0.701849	0.670906	0.753916	0.767953	0.753584	0.852571	1.0103	1.15779	1.46542
	12	1.08927	1.04537	0.934442	0.817956	0.797324	0.703734	0.678476	0.728436	0.759313	0.748065	0.747379	0.723084	0.728506	0.835624	0.944213	1.11211	1.43656
	13	1.34189	1.18325	1.02803	0.88724	0.838632	0.763373	0.729174	0.784473	0.829503	0.734805	0.711041	0.650181	0.669183	0.753121	0.859323
	14		1.09567	1.0522	0.909712	0.794845	0.741981	0.686271	0.728521	0.791281	0.731135	0.722833	0.671173	0.682545
	15			1.03839	0.893389	0.785602	0.743612	0.815017	0.72995	0.781937	0.763482	0.784761	0.789113	0.781224
	16				0.896764	0.826037	0.78997	0.746541	0.7396	0.722781	0.756995	0.829271	0.835032	0.837152
	17					0.868183	0.816167	0.847306	0.754965	0.67858	0.817217	0.943859	1.04791	1.06882
10	1					0.910797	0.751299	0.634611	0.571175	0.593581	0.615479	0.758173	0.786928	0.819399					10																		10
	2				1.04301	1.05756	0.886147	0.776036	0.641951	0.612597	0.64826	0.766065	0.753126	0.817463	0.781283
0.147465	3			0.974132	1.02734	1.05918	0.920745	0.816892	0.699207	0.654754	0.685896	0.745076	0.767104	0.785739	0.769597	0.759346
	4		0.906172	0.887995	0.871132	0.891328	0.8703	0.843482	0.81132	0.734322	0.694171	0.722548	0.752567	0.813718	0.753998	0.788084	0.832952
	5	1.12866	0.94556	0.851416	0.810518	0.793268	0.783251	0.780027	0.807067	0.722549	0.720307	0.767618	0.781465	0.813614	0.764114	0.83978	0.872323	0.932057
	6	1.06779	0.89071	0.84352	0.779374	0.687242	0.699247	0.708463	0.794176	0.795305	0.793794	0.751478	0.723646	0.77352	0.775406	0.823496	0.857983	0.943125
	7	1.04741	0.929026	0.831657	0.729418	0.65539	0.693786	0.697534	0.747026	0.734442	0.805504	0.774692	0.761529	0.76471	0.782184	0.896365	0.880273	0.967037
	8	1.08335	0.865929	0.754756	0.673842	0.623186	0.632544	0.654715	0.673385	0.713535	0.735424	0.694034	0.788933	0.826381	0.888771	0.915056	0.920448	1.0399
	9	0.979143	0.936524	0.751804		0.640227	0.666674	0.643847	0.694775	0.67085	0.716322	0.688487	0.786322	0.874962	0.904688	1.07054	1.06342	1.12784
	10	0.917245	0.932544	0.805817	0.670224	0.670096	0.639818	0.637065	0.68614	0.71332	0.700734	0.73766	0.779827	0.796843	0.945858	1.07588	1.17511	1.37798
	11	1.02704	0.952055	0.821544	0.701925	0.645419	0.669955	0.692043	0.703406	0.696684	0.717565	0.755224	0.774616	0.775765	0.824882	1.0068	1.10754	1.43148
	12	1.11938	1.05332	0.95235	0.829122	0.774854	0.695203	0.644351	0.718448	0.722713	0.75449	0.72486	0.736877	0.715019	0.809251	0.934042	1.10033	1.41721
	13	1.33823	1.13921	1.06232	0.908226	0.833262	0.772305	0.68186	0.732393	0.761507	0.784707	0.661694	0.656289	0.64983	0.739796	0.845928
	14		1.14839	1.06749	0.902848	0.740162	0.724627	0.655958	0.741692	0.796655	0.782586	0.713085	0.669791	0.658635
	15			1.07588	0.908414	0.81348	0.788152	0.739383	0.747058	0.791375	0.797881	0.77547	0.75434	0.73523
	16				0.88082	0.803036	0.763516	0.697374	0.665813	0.729745	0.728854	0.791362	0.773222	0.765801
	17					0.825311	0.762069	0.757032	0.70191	0.659656	0.782493	0.912934	0.969765	1.06376

## Sheet: Pref
Preferentiality
Signals of insufficient quality were excluded from the property maps. Signals could be rejected based on noise low amplitude, large artefact or ventricluar farfields that could not be substracted.
		1	2	3	4	5	6	7	8	9	10	11	12	13	14	15	16	17
1	1					1.58901	1.88359	1.8828	1.44154	0.690952	0.203768	0.0432883	3.07827	2.60966					1																		1
	2				1.92047	1.66369	2.67467	3.02119	0.213638	0.277898	0.248044	0.368781	0.0881232	2.72993	0.0532998
0.0065442	3			2.27547	2.02621	1.85913	3.0559	0.178901	0.314468	0.380309	0.333858	0.679002	1.42109	2.66422	3.01481	2.80054
	4		2.34404	2.15964	1.95991	1.71385	1.39511	0.317853	0.363741	0.578226	0.801963	1.27072	1.42248	1.28392	3.07214	2.78317	2.9301
	5	2.47785	2.32985	2.08209	1.88929	1.61112	1.50624	0.970011	0.320795	1.87799	1.83353	1.84702	1.6669	0.930719	0.472389	0.160974	3.02893	2.81422
	6	2.14535	2.20035	1.87629	1.7202	1.51735	1.24415	1.12273	1.20424	2.09913	1.98111	1.89212	1.67817	1.23087	0.718202	0.382282	0.131436	3.11028
	7	1.98822	1.95807	1.72206	1.46411	1.2705	1.10492	0.949602	1.05745	2.45453	1.96978	1.60584	1.44147	1.36242	0.925478	0.52314	0.221452	0.117695
	8	1.7969	1.7938	1.59489	1.40885	1.16786	1.02283	0.920078	0.831427	2.68041	2.28421	1.69762	1.6032	1.54187	1.42112	0.572279	3.06636	0.0553306
	9	1.25121	1.70836	1.52507		1.19849	1.09474	1.13546	1.21587	2.86362	0.0218321	2.14013	1.94944	1.95463	1.71118	1.47622	0.332924	2.88533
	10	0.978798	1.55729	1.55203	1.4097	1.38684	1.31876	1.60961	1.82746	2.82475	2.92375	2.49919	2.16227	2.16207	1.78022	1.60814	1.45059	1.70347
	11	1.00343	1.60085	1.53379	1.49853	1.57273	1.75015	1.88356	2.1319	2.8188	2.92778	2.54095	2.24414	2.12451	1.72101	1.65009	1.56779	1.70229
	12	0.229072	1.98491	1.89886	1.73052	1.78081	2.21071	2.67588	2.66403	3.10354	2.82095	2.44216	2.22593	1.92947	1.83988	1.81841	1.73739	1.92385
	13	2.33687	2.11643	1.80311	1.79909	1.85314	2.49803	2.91008	3.04045	0.00463739	2.87669	2.4373	2.0766	1.7612	1.76961	1.84155
	14		1.87891	1.62413	1.53072	1.426	1.29468	0.143765	0.0332482	2.81766	2.58378	2.27651	1.87604	1.79858
	15			1.56028	1.34306	1.26787	1.28691	1.55475	2.3028	2.31059	2.57764	0.762898	0.753958	1.76212
	16				1.36404	1.34902	1.41247	1.99376	1.99085	1.86807	1.36993	0.915448	0.600464	0.317061
	17					1.39194	1.61838	1.84733	1.8501	1.68415	1.29908	0.892196	0.522112	3.02757
2	1					1.60389	1.55985	1.24291	0.705469	0.610352	0.448915	0.268392	0.226244	3.08468					2																		2
	2				1.99457	1.82362	1.81954	0.614919	0.535814	0.479279	0.541896	0.497087	0.310968	3.04779	2.76614
0.00878726	3			2.24658	2.18887	2.05905	1.86391	0.451504	0.457094	0.5535	0.626816	0.7291	0.656176	2.8585	2.93968	2.31739
	4		2.46647	2.27134	2.18028	1.91596	2.15992	0.209735	0.329877	0.724531	0.853335	1.05018	1.16988	1.15783	2.56641	2.4442	2.45083
	5	2.5514	2.48771	2.28054	2.17328	1.92552	1.87801	2.93325	0.111397	1.44133	1.47949	1.31486	1.36535	1.31128	1.90507	2.52536	2.5006	2.45477
	6	2.42896	2.3866	2.16579	2.05568	1.70975	1.50387	2.63955	0.0728137	2.72063	2.14876	1.38974	1.36056	1.47857	1.14813	2.57262	2.64832	2.65849
	7	2.18469	2.05311	1.84041	1.55827	1.26445	1.13456	0.694663	2.67486	2.80061	2.67107	1.31587	1.07842	1.58569	2.2072	2.67656	2.81643	2.87753
	8	1.99002	1.81565	1.52156	1.30514	1.09348	0.947148	0.835418	2.40317	2.84138	2.91392	1.57901	1.38858	1.62339	1.76038	2.55915	2.83144	2.81252
	9	1.55032	1.62593	1.47054		1.02597	0.957326	0.988789	2.56495	2.67982	3.12872	2.27588	1.84373	1.82002	1.75966	2.27502	2.74272	2.5539
	10	1.04518	1.36797	1.28401	1.16163	1.11215	1.22662	1.35818	2.39168	2.81325	2.77356	2.60018	2.1388	1.92264	1.84425	1.82826	1.62396	2.22303
	11	1.14498	1.44742	1.26034	1.34821	1.26601	0.977962	1.13989	1.08033	3.09678	2.96839	2.68986	2.35911	1.96829	1.65848	1.60374	1.6134	1.81415
	12	1.1953	1.3759	1.52089	1.58079	1.8908	0.0456904	3.12198	0.00651731	0.0418018	2.92535	2.6157	2.27888	1.83661	1.80058	1.74809	1.73285	1.97136
	13	1.8806	1.99503	1.77497	1.87572	2.04453	2.82454	0.0383882	0.119382	0.101601	2.93986	2.75508	2.44926	1.6618	1.73475	1.84717
	14		2.06656	1.77639	1.63039	1.58768	0.895079	0.111483	0.162867	3.07173	2.72451	2.80282	2.64115	1.82649
	15			1.6086	1.45289	1.37123	1.07748	0.179527	2.90533	2.35292	2.46009	0.135223	0.167111	2.92572
	16				1.29886	1.32472	1.073	2.83513	2.20731	2.03465	1.43704	0.825252	0.495901	0.281837
	17					1.35364	2.18295	2.11942	2.05874	1.80393	1.41436	0.814067	0.382846	3.00948
3	1					1.60046	1.90227	1.83117	1.22977	0.778467	0.435742	0.414149	0.369981	0.267135					3																		3
	2				1.97133	1.64914	2.14648	2.72798	0.274003	0.379431	0.489303	0.533965	0.461854	0.408679	0.324013
0.0073441	3			2.30078	2.16944	2.23428	2.69063	0.174282	0.377144	0.337761	0.471591	0.717527	0.850657	0.742893	0.343712	2.33917
	4		2.41689	2.36968	2.22339	2.22887	2.73861	0.319557	0.448615	0.63922	0.947168	1.11049	1.0218	0.936209	0.833237	2.36712	2.54007
	5	2.44377	2.46214	2.37293	2.27836	2.12232	1.97032	1.64448	2.45836	2.10106	1.70269	1.6013	1.31822	1.09504	1.03523	2.81513	2.69021	2.56951
	6	2.52589	2.4667	2.3928	2.12527	1.49048	1.2601	1.36809	2.75655	2.68232	2.1472	1.76828	1.32307	1.29586	1.07599	2.87279	2.83838	2.78545
	7	2.46958	2.34976	1.94776	1.24792	0.963577	1.01959	1.06925	1.72488	2.62537	2.18296	1.43494	1.23696	1.38447	1.36184	2.75328	2.96745	2.99758
	8	1.96661	1.91744	1.44765	1.07497	0.945991	0.991504	0.913806	0.702064	2.7149	2.7233	1.47435	1.49643	1.62351	1.77858	2.32329	2.85916	2.87998
	9	1.64939	1.72411	1.38363		1.03248	1.00682	1.05597	0.368389	2.8045	2.99926	1.947	2.01488	1.89864	1.96342	2.39284	2.73	2.67007
	10	1.4305	1.52389	1.45691	1.25353	1.21101	1.12107	1.20663	2.1061	2.88889	2.82796	2.55632	2.46388	2.33405	2.2193	2.4257	2.77962	2.4521
	11	1.3917	1.56107	1.50225	1.37517	1.3708	1.21004	0.674489	3.09839	2.96706	2.92077	2.79193	2.60998	2.36766	1.51724	1.46071	1.47806	1.74463
	12	1.53009	1.90037	1.75795	1.69893	2.13826	0.0108856	2.94671	3.00424	3.10035	2.85662	2.58935	2.3351	1.94649	1.73125	1.68799	1.68588	1.96394
	13	2.09845	2.11157	1.9701	1.96342	2.17132	2.93099	3.08589	3.03417	0.0432956	2.85891	2.63435	2.39325	1.51583	1.6824	1.76173
	14		1.97889	1.71952	1.5434	1.49653	1.71223	3.02894	0.0107003	2.91585	2.88657	2.93071	2.04777	1.8112
	15			1.5627	1.40989	1.28873	1.27387	2.18875	2.51023	2.51452	2.99907	0.155319	0.374459	2.00308
	16				1.33686	1.32508	1.18881	2.21484	2.24498	2.07983	0.887023	0.985693	0.58318	0.314687
	17					1.30886	1.67119	2.0481	1.90541	1.76663	1.4211	0.856213	0.366158	2.78408
4	1					1.7044	1.71144	1.45266	0.442149	0.507061	0.199074	0.100883	3.1196	2.87724					4																		4
	2				1.89485	1.82616	2.37069	2.92226	0.183146	0.223945	0.255033	0.20183	0.0120055	2.87156	2.88056
0.00676019	3			2.32782	2.12355	2.04848	2.37321	3.07738	0.136593	0.261743	0.311405	0.31371	0.090679	2.72789	2.73639	2.39488
	4		2.46767	2.26712	2.12181	1.82847	1.85609	0.0251701	0.131642	0.384755	0.403561	0.738991	0.366446	2.36401	2.64224	2.4469	2.50867
	5	2.44588	2.45303	2.21288	2.04162	1.83043	1.72479	2.36702	2.78248	3.03481	2.42547	2.06588	1.79421	1.53084	2.4431	2.38815	2.55012	2.41455
	6	2.36873	2.37123	2.08754	1.85707	1.69727	1.54409	2.0994	2.53556	2.57559	2.4381	2.49575	2.00736	1.59711	1.05206	2.53325	2.75061	2.67114
	7	2.16414	2.2006	1.71526	1.43971	1.36079	1.32614	1.56293	2.47457	2.70151	2.62524	2.30492	1.50779	1.79913	2.47044	2.66965	2.86842	2.94518
	8	1.927	1.77657	1.54277	1.29575	1.21662	1.23901	1.11197	2.42212	2.89032	2.76323	2.38821	1.80876	2.08509	2.52711	2.62414	2.82104	2.83864
	9	1.75897	1.55698	1.47774		1.2895	1.29765	1.55608	2.03075	2.75812	3.04705	2.59056	2.30882	2.35308	2.38349	2.57495	2.79852	2.69907
	10	1.94001	1.65578	1.55346	1.30724	1.36277	1.55858	1.72608	2.01469	2.78706	2.83317	2.61184	2.49129	2.61412	2.34781	2.33293	2.43719	2.42016
	11	1.65742	1.68987	1.63501	1.45337	1.7695	1.97654	2.00574	2.31729	2.96999	2.88008	2.71941	2.58827	2.57531	2.09445	1.87777	1.76739	1.9179
	12	1.83458	1.91563	1.64569	1.82726	2.12571	2.54349	2.7553	2.88252	3.02935	2.85108	2.7462	2.54073	2.2845	1.99832	1.88645	1.83117	2.07409
	13	1.99836	2.03455	1.80161	1.90482	2.14892	2.72523	2.96184	3.01316	3.05979	2.85474	2.76211	2.57873	1.80205	1.86222	1.90157
	14		1.92018	1.69043	1.63216	1.55341	0.303774	3.13688	0.104455	2.9129	2.80668	2.82155	2.55146	2.02632
	15			1.62527	1.48583	1.36714	1.12663	3.08769	2.66709	2.46601	2.73292	2.87975	2.84344	2.78459
	16				1.43511	1.32516	1.22822	2.49259	2.22549	2.17182	2.35864	0.35187	0.306534	0.304342
	17					1.39467	1.69383	1.97069	2.0937	1.81168	1.62368	0.845506	0.346251	2.94597
5	1					1.7134	2.04152	2.0152	0.33659	0.497687	0.297691	0.225774	0.0453608	2.89892					5																		5
	2				1.70182	1.98436	2.48477	2.87145	0.0974704	0.326848	0.373513	0.301463	0.0184161	2.86685	2.92294
0.00676127	3			2.56656	2.28409	2.53626	2.89666	3.09239	0.162834	0.287905	0.420529	0.445098	0.0875628	2.87165	2.80449	2.23131
	4		2.43936	2.27675	2.19779	2.28269	2.84664	3.08826	0.155642	0.31738	0.593399	0.96995	0.89576	0.410434	2.71437	2.35145	2.54428
	5	2.40761	2.32722	2.24177	2.07302	2.00363	2.10616	2.4392	2.79971	3.00685	2.42477	1.80058	1.47155	0.842309	0.0851658	2.4765	2.6387	2.57022
	6	2.31847	2.33073	2.15531	1.94475	1.58991	1.46855	1.73003	2.42508	2.66939	2.65116	2.4604	1.99194	1.12904	0.415017	2.9894	2.83857	2.8344
	7	2.1715	2.17122	1.93291	1.59348	1.37085	1.31104	1.56893	2.26198	2.70427	2.6346	0.353294	0.988993	1.2071	0.15486	2.84209	2.85416	2.9604
	8	2.04606	1.83744	1.62557	1.34124	1.27113	1.25039	1.5412	2.44858	2.73787	2.81146	0.855681	1.24106	1.66158	2.36872	2.67811	2.9703	2.78608
	9	1.31637	1.59042	1.50305		1.31503	1.40963	1.59753	2.54518	2.86168	3.04267	2.95664	2.47348	2.27336	2.54519	2.73696	2.73461	2.63805
	10	1.01072	1.37935	1.3988	1.37187	1.41929	1.48048	1.727	2.67949	2.92563	2.87925	2.77635	2.53377	2.70987	2.87187	2.95284	2.73823	2.46997
	11	0.975098	1.22271	1.43386	1.40977	1.7072	1.94159	1.93388	2.83519	3.07948	2.94368	2.89594	2.63057	2.87122	1.27028	1.45589	1.46932	1.79146
	12	1.12026	1.52622	1.60099	1.89462	1.938	2.46756	2.81495	2.98827	0.0553349	2.89428	2.82651	2.60731	2.10301	1.65285	1.69182	1.68701	1.94742
	13	2.00605	1.95365	1.85016	2.01948	2.28611	2.81614	3.10847	0.0272159	0.104296	2.93745	2.78334	2.7569	1.32643	1.6071	1.80017
	14		1.9518	1.76956	1.80616	1.77558	0.75511	0.1263	0.251732	3.01003	2.92073	2.88941	2.77238	1.45955
	15			1.63268	1.58469	1.43695	1.22428	0.114225	2.75634	2.79926	0.0202536	2.98757	0.089118	2.85361
	16				1.45597	1.43204	1.32888	2.11627	2.12155	2.02343	2.51151	3.11699	0.374335	0.17104
	17					1.53221	1.91607	1.99245	2.00098	1.80532	1.3125	0.552465	0.222106	2.88601
6	1					1.65517	1.69752	1.6183	1.17673	0.798302	0.281486	0.166346	0.0903537	2.93919					6																		6
	2				1.76016	1.74862	1.90134	2.03848	0.581121	0.391448	0.357958	0.302525	0.0162755	2.8847	2.94898
0.00692531	3			2.63291	2.21882	3.0768	0.325989	0.305663	0.388514	0.423721	0.440011	0.555128	0.052258	2.93295	2.81328	2.23066
	4		2.57595	2.33449	2.15418	1.76323	0.68237	0.328469	0.401957	0.55231	0.603707	0.913	0.783405	0.148059	3.04458	2.25805	2.37588
	5	2.56303	2.51574	2.34864	2.15066	1.75862	1.45003	0.546918	0.149602	0.900032	1.30011	1.48615	0.987059	0.513407	0.292761	2.33178	2.48844	2.42592
	6	2.48998	2.4995	2.28531	1.94125	1.44377	1.35056	1.44715	3.10294	2.53437	1.35922	1.10346	1.1719	1.31758	0.987395	2.42933	2.63676	2.6237
	7	2.29939	2.31914	1.83021	1.34493	1.21772	1.10835	1.1187	1.60351	2.64018	2.29676	0.840487	1.2233	1.59786	2.1415	2.49509	2.83517	2.93312
	8	1.96759	2.00031	1.53822	1.21462	1.1054	1.0175	1.07021	1.19466	2.82386	2.8929	0.884354	1.46004	1.97404	2.28556	2.58647	2.90123	2.84236
	9	1.81486	1.85784	1.45275		1.08185	1.05478	1.20357	1.69405	2.82987	3.07712	2.97234	2.3345	2.43504	2.39677	2.60298	2.67155	2.67951
	10	1.14569	1.45267	1.42158	1.20137	1.20426	1.25955	1.31923	1.23049	2.86958	2.88188	2.83359	2.58435	2.78021	2.48882	2.413	2.42152	2.27561
	11	0.983866	1.24965	1.44265	1.35272	1.45138	1.48921	1.46531	2.80751	3.00097	2.94273	2.82374	2.66994	2.52946	1.68432	1.63432	1.62359	1.82954
	12	1.28919	1.67823	1.6181	1.60923	1.72827	2.80478	3.11535	2.87026	3.04279	2.90222	2.70875	2.46459	2.03211	1.88893	1.7972	1.73875	1.97906
	13	2.19382	2.08457	1.92974	1.91423	2.20086	2.74495	2.99899	3.06768	0.0197978	2.99167	2.86731	2.59683	1.73165	1.76397	1.84602
	14		2.06549	1.78919	1.70395	1.60478	2.96225	0.0213085	0.000230684	2.98085	2.93592	2.88363	2.48558	1.80372
	15			1.58793	1.45307	1.35231	0.935016	3.09842	2.77336	2.6821	2.94937	0.0310872	0.330342	3.13997
	16				1.40165	1.34637	1.13647	2.56075	2.4218	2.16336	1.82721	0.881828	0.745503	0.490151
	17					1.37072	1.65417	2.40965	2.1565	1.82316	1.23127	0.677901	0.379721	2.89788
7	1					1.55205	1.77202	2.90227	0.39192	0.361526	0.158775	0.230028	0.197011	2.78667					7																		7
	2				1.85849	2.29713	2.62722	2.97777	0.138602	0.267246	0.312479	0.411837	0.346864	2.7408	2.68769
	3			2.47662	2.30018	2.37179	2.84562	0.00665159	0.237557	0.256975	0.368125	0.76032	0.840921	2.13353	2.5164	2.52731
	4		2.54689	2.43461	2.26604	2.20612	2.60427	0.0925538	0.263731	0.48344	0.817841	1.15145	1.16879	1.2847	2.5117	2.54732	2.57284
	5	2.40841	2.50592	2.40396	2.29183	2.04387	1.92325	2.1981	2.36122	1.31186	1.57604	1.58842	1.27564	1.2302	0.0818281	2.74026	2.69092	2.61527
	6	2.41609	2.4231	2.31484	2.12933	1.73941	1.62374	1.74272	2.31367	2.50639	2.1488	1.83573	1.26316	1.11027	0.60571	2.97755	2.89097	2.82294
	7	2.24296	2.27589	2.08697	1.51551	1.47093	1.23687	1.40996	2.42234	2.64521	2.39288	1.26787	0.923804	1.03029	0.637908	3.01384	3.0219	3.06186
	8	2.01856	1.99913	1.72258	1.31695	1.30194	1.22882	1.25111	2.2949	2.76988	2.66743	1.0526	1.07465	1.41904	0.932112	2.88279	2.94695	3.02193
	9	1.91146	1.85406	1.62565		1.32308	1.27216	1.53878	2.28789	2.86219	3.02655	1.8094	2.00821	1.62586	2.3997	2.76853	2.91088	2.80176
	10	2.59286	1.73349	1.56293	1.39417	1.36796	1.51515	1.48485	2.28993	2.78949	2.80218	2.72242	2.51567	2.78469	3.00145	0.0664868	0.0457784	2.28454
	11	1.26107	1.62739	1.49727	1.48972	1.5026	1.72308	1.57784	2.0963	0.0624027	3.0116	2.82005	2.7204	2.97709	1.24884	1.47168	1.52744	1.7443
	12	1.68894	1.80671	1.76037	1.77144	2.11175	0.109392	3.0685	2.94241	0.0266979	3.02151	2.74785	2.66809	2.1307	1.74885	1.74912	1.76054	1.99721
	13	2.14364	2.17563	1.82605	2.0442	2.24032	2.8819	3.08056	0.0753302	0.111892	3.12034	2.98093	2.91892	1.68412	1.82617	1.89108
	14		1.98191	1.73291	1.6492	1.40222	1.19933	0.117924	0.220816	3.13164	3.11358	3.08274	2.88071	2.00696
	15			1.65799	1.5784	1.399	1.29491	1.72328	2.56168	2.90164	3.0946	0.0442534	3.12074	2.87532
	16				1.44181	1.42559	1.37168	1.78855	2.00909	2.18138	0.408128	0.280837	0.12207	0.0629695
	17					1.42783	1.46631	1.63367	1.74068	1.61999	0.925574	0.282044	0.0949289	2.89522
8	1					1.51823	1.54973	1.04463	0.677659	0.488002	0.288473	0.190914	0.107509	3.02129					8																		8
	2				2.73971	2.30496	0.615243	0.315117	0.322103	0.343543	0.35079	0.519493	0.278347	2.85645	2.9305
0.00738342	3			2.41904	2.36009	2.87991	3.11787	0.232412	0.229551	0.348388	0.509858	0.806277	1.00771	2.71935	2.74649	2.53275
	4		2.43362	2.37877	2.27392	2.23251	2.49614	0.0236227	0.376049	0.683499	0.877552	1.17568	1.20899	1.57173	2.56792	2.61861	2.67893
	5	2.36458	2.42447	2.26339	2.22671	2.08928	1.93442	2.04951	1.91824	1.80583	1.94046	1.82711	1.54825	1.34688	2.93824	2.73052	2.73447	2.62883
	6	2.36494	2.37299	2.14486	2.14429	2.06298	1.62909	1.83166	2.28568	2.51483	2.32408	1.95137	1.67598	1.30634	0.334701	2.90216	2.86916	2.81088
	7	2.26077	2.27991	2.10581	1.81088	1.44592	1.4291	1.78447	2.53083	2.61463	2.35137	1.04535	1.29227	1.52247	0.130925	2.97982	3.02344	2.99863
	8	2.24347	2.05245	1.81028	1.39159	1.28234	1.29248	1.23734	2.59255	2.62137	2.6534	1.26711	1.32957	1.64634	2.14408	2.80541	2.90905	2.90128
	9	1.70944	1.7914	1.53541		1.18543	1.22926	1.30837	2.41413	2.69683	3.00768	1.62191	2.16599	2.20961	2.34042	2.59	2.82622	2.74281
	10	1.24702	1.58649	1.52901	1.31246	1.29056	1.25394	1.59989	2.30409	2.8195	2.66434	2.72266	2.47902	2.73023	2.25712	2.14505	2.05524	2.29639
	11	1.32393	1.489	1.45349	1.38493	1.35035	1.27114	1.88667	2.6089	2.92069	2.7719	2.73282	2.59401	2.59718	1.70204	1.64204	1.60789	1.85121
	12	1.13331	1.46375	1.28735	1.36137	1.50029	0.343281	3.09227	3.06453	3.06072	2.80893	2.70885	2.50081	2.15883	1.74831	1.73377	1.77251	1.95757
	13	2.15903	2.36896	1.84513	1.80432	2.07249	2.87491	0.0102302	0.00204801	3.12407	2.82027	2.72377	2.63879	1.86638	1.7115	1.80294
	14		2.08504	1.74654	1.67714	1.63994	1.68097	0.122733	0.180099	2.98794	2.80646	2.89137	2.56909	1.89885
	15			1.65651	1.55285	1.58511	1.6046	1.7952	2.32978	2.4298	2.79839	3.03357	3.04421	2.81997
	16				1.4806	1.38312	1.44734	2.18016	1.87831	1.79854	1.51008	0.771203	0.585643	0.20716
	17					1.32912	1.59178	1.88517	1.88123	1.66842	1.37774	0.974517	0.465865	2.97971
9	1					1.54792	2.02979	1.37802	0.592019	0.56432	0.382439	0.357883	0.433883	0.122745					9																		9
	2				1.84837	1.89817	2.4168	3.04743	0.306742	0.356392	0.429981	0.498878	0.438228	0.0405844	2.82269
0.00705682	3			2.25805	2.06726	2.1208	2.68182	0.123478	0.296884	0.375419	0.483318	0.762426	0.630937	3.08466	2.71748	2.35927
	4		2.46164	2.27861	2.20234	2.34556	2.86281	0.263705	0.335361	0.561901	0.855354	1.04404	1.10625	0.931191	0.0089839	2.44097	2.56849
	5	2.4833	2.50591	2.31125	2.26124	2.18749	2.57854	0.0835622	0.10409	0.589146	1.42775	1.65456	1.38288	1.13165	0.901175	2.51986	2.6889	2.57523
	6	2.56217	2.59586	2.27084	2.0036	1.42527	0.98161	0.0736941	2.87531	2.89134	2.37411	1.8299	1.4386	1.31577	1.07249	2.73389	2.84241	2.79294
	7	2.32096	2.41665	1.87849	1.29676	1.16384	0.944245	0.912973	2.51235	2.90839	3.08014	1.11173	1.08322	1.58308	1.67259	2.83962	2.94553	3.02923
	8	2.24495	1.923	1.59564	1.31578	1.32536	1.08707	0.872935	2.75025	2.87777	2.94202	0.87319	1.16824	1.76236	2.01754	2.6417	2.94605	2.9562
	9	1.87928	1.7243	1.54822		1.37268	1.39921	1.49235	2.95593	2.85834	3.10816	2.0794	2.19055	2.12567	2.01622	2.53595	2.80259	2.74248
	10	1.55621	1.69643	1.59703	1.44924	1.51173	1.60019	1.68465	3.03866	2.91557	2.90119	2.66358	2.52393	2.46422	1.99738	2.06396	2.18101	2.50847
	11	1.02125	1.59539	1.61753	1.49822	1.60554	1.7148	2.0456	2.93562	3.03348	2.97258	2.7747	2.6256	2.31137	1.58574	1.48842	1.5428	1.80845
	12	1.5298	1.90343	1.68019	1.71165	2.0604	2.60071	2.86293	3.06379	0.00979368	2.92768	2.6341	2.38538	2.00395	1.84133	1.738	1.76541	1.9329
	13	2.09683	2.15558	1.89737	1.9719	2.20454	2.65165	2.86586	3.00357	3.11797	2.84385	2.75504	2.4809	1.71618	1.78287	1.8701
	14		1.96898	1.73426	1.73638	1.69759	1.60591	3.0296	3.08304	2.89912	2.73144	2.74962	2.1993	1.88865
	15			1.62494	1.59463	1.5164	1.45815	1.64295	2.44203	2.37958	2.2019	1.35038	0.300409	1.90544
	16				1.41246	1.49746	1.37042	2.06841	2.09213	2.01021	1.61135	1.26455	0.719049	0.422189
	17					1.40848	1.56996	2.04456	1.91419	1.76829	1.54148	1.0699	0.61852	2.98744
10	1					1.54229	1.62629	1.46555	1.06968	0.822467	0.419026	0.208439	0.162025	3.09531					10																		10
	2				1.77734	1.82562	2.04278	2.54585	0.407422	0.320155	0.479355	0.460102	0.298477	2.94067	2.83797
	3			2.27287	2.21325	2.12882	2.59561	0.0310054	0.257713	0.346188	0.449838	0.77005	0.807049	3.03821	2.78699	2.65821
	4		2.49559	2.3655	2.13746	2.05419	2.81281	0.0472087	0.199343	0.393532	0.643124	1.22334	1.30497	1.55902	2.83151	2.72981	2.74622
	5	2.54829	2.53601	2.31956	2.06962	1.83874	1.63402	0.0881009	0.275474	0.0617511	2.05569	1.7657	1.65721	1.26414	0.215552	2.91954	2.85601	2.69498
	6	2.46083	2.48389	2.24423	1.87097	1.47118	1.21761	1.3041	3.06147	2.76246	2.15381	1.79666	1.65951	1.293	0.639482	0.0630421	3.01456	2.8893
	7	2.282	2.29508	1.86452	1.38275	1.17353	1.06598	0.983849	1.60522	2.63472	2.37663	1.76474	1.2872	1.30547	0.817016	0.198861	0.0852301	0.0115217
	8	2.03846	1.79587	1.47977	1.19475	1.09827	1.09863	0.833021	2.52966	2.63801	2.70841	1.66953	1.45661	1.56453	1.24097	2.99459	3.10543	3.06881
	9	1.55012	1.6153	1.41433		1.16517	1.19658	1.2028	2.86016	2.74657	3.01074	2.5299	2.11579	2.14234	1.91729	2.56891	3.05434	2.89231
	10	1.45946	1.50308	1.46344	1.36412	1.39425	1.47999	1.7097	2.39446	2.89392	2.79629	2.56048	2.25177	2.15931	1.90943	1.49433	1.23753	2.11897
	11	1.37721	1.52238	1.48951	1.44417	1.55606	1.61308	1.81718	2.09623	2.96656	3.03986	2.69179	2.39091	2.19519	1.69156	1.59281	1.58355	1.77392
	12	1.66958	1.72614	1.69904	1.70871	1.72416	1.86515	2.91666	3.00508	3.08306	2.89799	2.58007	2.40019	1.96415	1.82764	1.78886	1.77225	1.95205
	13	2.0015	2.04041	1.87896	1.94511	1.88941	2.47084	2.97349	3.00991	3.06385	2.85994	2.7145	2.3387	1.69269	1.75926	1.8694
	14		1.95797	1.76607	1.77894	1.69723	1.69964	3.1062	3.0682	2.78667	2.8443	2.93302	2.37418	1.88933
	15			1.64782	1.61493	1.5534	1.53224	2.59259	2.55583	2.4139	2.26534	0.942196	0.54134	1.7049
	16				1.50028	1.53159	1.53096	2.19305	2.2689	1.95577	1.39292	0.994594	0.725475	0.423773
	17					1.44269	1.56585	2.0476	2.05642	1.73511	1.33713	0.869561	0.341481	2.98668
