# Supplementary material for: Stationary Atrial Fibrillation Properties in the Goat Do Not Entail Stable or Recurrent Conduction Patterns
Source: Front Physiol. 2018 Jul 27;9:947. doi: 10.3389/fphys.2018.00947 (PMC6072874; doi:10.3389/fphys.2018.00947)
Supplement: Supplementary file 1 [file Data_Sheet_1.ZIP › Goat_9_Property maps.xlsx]

## Sheet: AFCL
AFCL
Signals of insufficient quality were excluded from the property maps. Signals could be rejected based on noise low amplitude, large artefact or ventricluar farfields that could not be substracted.
		1	2	3	4	5	6	7	8	9	10	11	12	13	14	15	16	17
1	1					0.102984	0.103946	0.103946	0.103946	0.104909	0.102502	0.102984	0.102021	0.101059					1																		1
	2				0.100096	0.101059	0.101059	0.102021	0.103946	0.102021	0.102984	0.101059	0.101059	0.0991338	0.101059
0.00779495	3			0.100096	0.100096	0.101059	0.101059	0.101059	0.102021	0.101059	0.0991338	0.101059	0.0981713	0.100096	0.0981713	0.0991338
	4		0.0991338	0.0991338	0.100096	0.102021	0.101059	0.101059	0.100096	0.0991338	0.0991338	0.0991338	0.0991338	0.0991338	0.0991338	0.100096	0.0919153
	5	0.0991338	0.100096	0.100096	0.100096	0.100096	0.100577	0.0991338	0.100096	0.100096	0.0991338	0.100096	0.0981713	0.0991338	0.100096	0.0991338	0.0952839	0.0895091
	6	0.0981713	0.100096	0.099615	0.102021	0.101059	0.101059	0.100096	0.0991338	0.0991338	0.100096	0.102021	0.0991338	0.0991338	0.0981713	0.0962464	0.0991338	0.0895091
	7	0.0972089	0.0962464	0.100096	0.101059	0.0991338	0.0972089	0.0962464	0.0981713	0.100096	0.100096	0.100096	0.100096	0.0991338	0.0981713	0.0972089	0.0972089	0.0914341
	8	0.100096	0.100096	0.101059	0.100096	0.0991338	0.0972089	0.0952839	0.0943215	0.0943215	0.101059	0.100096	0.100096	0.100096	0.0981713	0.0943215	0.0962464	0.0914341
	9	0.100096	0.0981713	0.0991338		0.0981713	0.0972089	0.0957652	0.0923965	0.0914341	0.0981713	0.0981713	0.0981713	0.0976901	0.0972089	0.0943215	0.0962464	0.0904716
	10	0.101059	0.0991338	0.0991338	0.100096	0.0991338	0.0972089	0.0943215	0.0914341	0.0904716	0.093359	0.0981713	0.0962464	0.0962464	0.0952839	0.0943215	0.0943215	0.0866218
	11	0.0991338	0.0991338	0.0991338	0.0991338	0.0991338	0.0962464	0.0914341	0.0914341	0.0895091	0.0904716	0.0914341	0.0923965	0.0914341	0.093359	0.0914341	0.0904716	0.0837344
	12	0.0972089	0.0972089	0.0972089	0.0991338	0.0991338	0.0943215	0.0875842	0.0885467	0.0885467	0.0875842	0.0866218	0.0856593	0.0856593	0.0866218	0.0866218	0.0875842	0.0846968
	13	0.0962464	0.0972089	0.0972089	0.0962464	0.0962464	0.0875842	0.0856593	0.0846968	0.0866218	0.0827719	0.0818094	0.0818094	0.0818094	0.0846968	0.0856593	0.0866218	0.0818094
	14		0.0972089	0.0962464	0.0943215	0.0856593	0.080847	0.080847	0.0827719	0.0818094	0.078922	0.0798845	0.0798845	0.0798845	0.0818094	0.0846968	0.0827719
	15			0.0895091	0.0866218	0.080847	0.078922	0.0798845	0.0798845	0.080847	0.078922	0.0779596	0.0798845	0.0798845	0.078922	0.0818094
	16				0.0856593	0.0798845	0.0784408	0.078922	0.080847	0.0798845	0.078922	0.078922	0.078922	0.078922	0.080847
	17					0.0818094	0.078922	0.078922	0.0798845	0.080847	0.0818094	0.0803657	0.0798845	0.0798845
2	1					0.102021	0.102021	0.103946	0.102021	0.102984	0.102021	0.102984	0.102021	0.100096					2																		2
	2				0.100096	0.100096	0.0991338	0.102021	0.101059	0.10154	0.102021	0.100096	0.101059	0.100096	0.102984
0.0074415	3			0.0991338	0.100096	0.100096	0.101059	0.101059	0.102021	0.102021	0.101059	0.101059	0.0991338	0.100096	0.101059	0.100096
	4		0.0991338	0.0991338	0.0991338	0.0991338	0.0991338	0.100096	0.102021	0.100096	0.100096	0.100096	0.0991338	0.0991338	0.101059	0.100096	0.0914341
	5	0.0991338	0.0991338	0.100096	0.100096	0.100096	0.101059	0.101059	0.100096	0.101059	0.0991338	0.100096	0.0981713	0.100096	0.100096	0.100096	0.0972089	0.0904716
	6	0.0991338	0.100096	0.102021	0.102021	0.101059	0.101059	0.0991338	0.0991338	0.0981713	0.099615	0.0991338	0.100096	0.0991338	0.0981713	0.0981713	0.0981713	0.0904716
	7	0.0972089	0.0972089	0.0991338	0.100096	0.0991338	0.0981713	0.0962464	0.0972089	0.0991338	0.0991338	0.0991338	0.0991338	0.100096	0.0972089	0.0981713	0.0981713	0.0943215
	8	0.0991338	0.0991338	0.100096	0.0991338	0.0972089	0.0962464	0.093359	0.0914341	0.093359	0.101059	0.100577	0.0991338	0.0991338	0.0991338	0.0962464	0.0972089	0.0923965
	9	0.100096	0.100096	0.0991338		0.0991338	0.0972089	0.0943215	0.0914341	0.0895091	0.0972089	0.0981713	0.0981713	0.100096	0.0981713	0.0962464	0.0972089	0.0904716
	10	0.0991338	0.100096	0.100096	0.0991338	0.0991338	0.0981713	0.0943215	0.0909528	0.0885467	0.093359	0.0981713	0.0972089	0.0972089	0.0972089	0.0962464	0.0952839	0.0856593
	11	0.0991338	0.0981713	0.0972089	0.0991338	0.0991338	0.0981713	0.0914341	0.0914341	0.0895091	0.0885467	0.0904716	0.093359	0.0952839	0.0943215	0.093359	0.0923965	0.0827719
	12	0.0981713	0.0972089	0.0962464	0.0981713	0.0991338	0.093359	0.0866218	0.0875842	0.0885467	0.0866218	0.0856593	0.0866218	0.0875842	0.0875842	0.0875842	0.0875842	0.0827719
	13	0.0962464	0.0972089	0.0972089	0.0962464	0.0952839	0.0866218	0.0837344	0.0837344	0.0837344	0.0818094	0.080847	0.0813282	0.080847	0.0856593	0.0875842	0.0875842	0.0818094
	14		0.0952839	0.0962464	0.093359	0.0885467	0.0818094	0.0827719	0.0837344	0.0818094	0.0798845	0.080847	0.080847	0.080847	0.0818094	0.0846968	0.0837344
	15			0.0904716	0.0875842	0.0818094	0.080847	0.0818094	0.0798845	0.0818094	0.080847	0.080847	0.080847	0.080847	0.080847	0.080847
	16				0.0866218	0.0818094	0.080847	0.080847	0.0822907	0.0798845	0.0798845	0.0798845	0.0798845	0.0798845	0.0818094
	17					0.0837344	0.080847	0.080847	0.0827719	0.0827719	0.080847	0.0818094	0.0818094	0.0818094
3	1					0.102021	0.102984	0.102021	0.102021	0.101059	0.102502	0.102021	0.101059	0.100096					3																		3
	2				0.101059	0.102021	0.102021	0.101059	0.101059	0.101059	0.102984	0.102021	0.100096	0.100096	0.100096
0.00732629	3			0.0991338	0.100096	0.101059	0.102984	0.102021	0.102021	0.101059	0.102021	0.101059	0.0991338	0.100096	0.101059	0.0991338
	4		0.0991338	0.0991338	0.100096	0.101059	0.101059	0.101059	0.102984	0.102021	0.101059	0.101059	0.101059	0.0991338	0.100096	0.0991338	0.0914341
	5	0.0981713	0.0991338	0.0991338	0.100096	0.100096	0.101059	0.101059	0.101059	0.102021	0.101059	0.0991338	0.100096	0.101059	0.0991338	0.100096	0.0972089	0.0914341
	6	0.0981713	0.0991338	0.101059	0.101059	0.100096	0.0991338	0.0991338	0.100096	0.100096	0.100096	0.101059	0.100096	0.0991338	0.0976901	0.0981713	0.0981713	0.0904716
	7	0.0972089	0.0972089	0.0991338	0.10154	0.100096	0.0981713	0.0981713	0.0981713	0.099615	0.0991338	0.100096	0.101059	0.101059	0.0981713	0.0972089	0.0981713	0.0914341
	8	0.0972089	0.0981713	0.0991338	0.100096	0.0991338	0.0972089	0.0962464	0.0943215	0.0952839	0.0991338	0.100096	0.100096	0.100096	0.0991338	0.0952839	0.0972089	0.0914341
	9	0.0991338	0.0991338	0.0991338		0.0981713	0.0991338	0.0962464	0.0923965	0.0923965	0.0991338	0.0991338	0.100096	0.100096	0.0981713	0.093359	0.0952839	0.0895091
	10	0.0986526	0.0981713	0.0981713	0.0991338	0.0981713	0.0991338	0.0952839	0.0923965	0.0904716	0.093359	0.0991338	0.0981713	0.0962464	0.0962464	0.0943215	0.0943215	0.0875842
	11	0.0981713	0.0981713	0.0981713	0.0972089	0.0981713	0.0981713	0.0923965	0.0914341	0.0904716	0.0904716	0.0923965	0.0952839	0.0952839	0.0938402	0.0914341	0.0904716	0.0856593
	12	0.0972089	0.0972089	0.0962464	0.0962464	0.0972089	0.0972089	0.0904716	0.0885467	0.0895091	0.0875842	0.0875842	0.0885467	0.0885467	0.0875842	0.0875842	0.0875842	0.0856593
	13	0.0972089	0.0972089	0.0972089	0.0962464	0.0952839	0.0875842	0.0846968	0.0837344	0.0846968	0.080847	0.0818094	0.0813282	0.0827719	0.0866218	0.0875842	0.0895091	0.0837344
	14		0.0962464	0.0952839	0.0923965	0.0875842	0.0837344	0.0837344	0.0837344	0.0827719	0.0798845	0.078922	0.080847	0.0798845	0.0818094	0.0866218	0.0856593
	15			0.0895091	0.0866218	0.0818094	0.080847	0.0827719	0.0818094	0.080847	0.0798845	0.0798845	0.078922	0.080847	0.0798845	0.0837344
	16				0.0856593	0.0818094	0.080847	0.0818094	0.0818094	0.080847	0.080847	0.078922	0.078922	0.078922	0.0818094
	17					0.0837344	0.0827719	0.080847	0.0818094	0.0837344	0.0837344	0.0822907	0.080847	0.0818094
4	1					0.103946	0.104909	0.102984	0.102021	0.102984	0.102021	0.102021	0.102984	0.102984					4																		4
	2				0.102021	0.103946	0.104909	0.103946	0.102984	0.102021	0.102984	0.102021	0.101059	0.102021	0.102021
0.00767607	3			0.100096	0.102021	0.102984	0.103946	0.103946	0.104909	0.102984	0.101059	0.102021	0.100096	0.102021	0.102021	0.100096
	4		0.0986526	0.100096	0.101059	0.101059	0.102021	0.102021	0.103946	0.101059	0.102021	0.101059	0.101059	0.102021	0.101059	0.102021	0.0923965
	5	0.100096	0.101059	0.101059	0.101059	0.102021	0.10154	0.100096	0.101059	0.101059	0.102984	0.102021	0.100096	0.102021	0.101059	0.0991338	0.0981713	0.0923965
	6	0.100096	0.101059	0.102021	0.101059	0.100096	0.101059	0.100096	0.101059	0.100096	0.100096	0.102021	0.101059	0.100096	0.101059	0.0972089	0.0981713	0.0914341
	7	0.0981713	0.0991338	0.102984	0.100096	0.0991338	0.0981713	0.0972089	0.0991338	0.0991338	0.0991338	0.100096	0.101059	0.100096	0.0991338	0.0981713	0.0976901	0.0923965
	8	0.101059	0.102021	0.102021	0.102021	0.101059	0.0972089	0.0962464	0.093359	0.0943215	0.101059	0.102021	0.100096	0.0991338	0.100096	0.0981713	0.0972089	0.0914341
	9	0.101059	0.100096	0.100096		0.100096	0.0991338	0.0952839	0.0923965	0.0904716	0.102021	0.100096	0.0991338	0.0991338	0.099615	0.0972089	0.0981713	0.0914341
	10	0.101059	0.101059	0.100096	0.100096	0.0991338	0.100096	0.0952839	0.0923965	0.0904716	0.093359	0.100096	0.0991338	0.0981713	0.0991338	0.0991338	0.0972089	0.0875842
	11	0.100096	0.100096	0.100096	0.100096	0.0991338	0.0981713	0.0904716	0.0914341	0.0895091	0.0904716	0.0914341	0.0972089	0.0972089	0.0972089	0.0943215	0.093359	0.0856593
	12	0.0986526	0.0972089	0.0981713	0.0991338	0.100096	0.0962464	0.0895091	0.0885467	0.0895091	0.0875842	0.0875842	0.0866218	0.0895091	0.0895091	0.0875842	0.0885467	0.0856593
	13	0.0952839	0.0972089	0.0972089	0.0981713	0.0952839	0.0885467	0.0866218	0.0837344	0.0856593	0.0827719	0.0827719	0.0818094	0.0818094	0.0866218	0.0875842	0.0885467	0.0837344
	14		0.0952839	0.0962464	0.0952839	0.0866218	0.0827719	0.0827719	0.0846968	0.0837344	0.080847	0.0818094	0.080847	0.0798845	0.0818094	0.0856593	0.0846968
	15			0.0904716	0.0875842	0.0827719	0.0818094	0.0818094	0.0818094	0.0818094	0.080847	0.080847	0.0818094	0.080847	0.080847	0.0827719
	16				0.0866218	0.0827719	0.0803657	0.080847	0.0827719	0.080847	0.0813282	0.0798845	0.0798845	0.078922	0.0813282
	17					0.0837344	0.0837344	0.080847	0.0827719	0.0837344	0.0837344	0.080847	0.0818094	0.0818094
5	1					0.102021	0.103946	0.103465	0.102984	0.102984	0.0991338	0.102984	0.100096	0.0991338					5																		5
	2				0.101059	0.102021	0.100096	0.102021	0.101059	0.102021	0.102021	0.101059	0.101059	0.100096	0.101059
0.00729301	3			0.0972089	0.101059	0.100096	0.101059	0.101059	0.102021	0.102984	0.101059	0.101059	0.0991338	0.100096	0.100096	0.101059
	4		0.0972089	0.0991338	0.0991338	0.0991338	0.0991338	0.100096	0.101059	0.101059	0.101059	0.100096	0.100096	0.0991338	0.100096	0.100096	0.0948027
	5	0.0981713	0.0981713	0.0991338	0.0991338	0.0991338	0.0991338	0.0981713	0.0991338	0.101059	0.100096	0.100096	0.100096	0.101059	0.0991338	0.0991338	0.0972089	0.0904716
	6	0.0972089	0.0972089	0.0991338	0.100096	0.100096	0.0991338	0.0991338	0.0991338	0.0986526	0.100096	0.100577	0.100096	0.101059	0.0981713	0.0972089	0.0981713	0.0904716
	7	0.0962464	0.0962464	0.0981713	0.0991338	0.0981713	0.0952839	0.0952839	0.0972089	0.0981713	0.0981713	0.100096	0.100096	0.100096	0.0991338	0.0981713	0.0972089	0.0923965
	8	0.0981713	0.0962464	0.0962464	0.0972089	0.0972089	0.0943215	0.093359	0.0923965	0.093359	0.100096	0.100096	0.100096	0.099615	0.101059	0.0981713	0.0952839	0.093359
	9	0.0981713	0.0981713	0.0972089		0.0962464	0.0962464	0.0943215	0.0914341	0.0895091	0.100096	0.0981713	0.0981713	0.0981713	0.0991338	0.0962464	0.0981713	0.0914341
	10	0.0991338	0.0981713	0.0981713	0.0981713	0.0972089	0.0972089	0.0943215	0.0914341	0.0895091	0.0952839	0.0986526	0.0981713	0.0972089	0.0972089	0.0972089	0.0952839	0.0885467
	11	0.0981713	0.0986526	0.0981713	0.0981713	0.0981713	0.0962464	0.0914341	0.0914341	0.0885467	0.0895091	0.0904716	0.0943215	0.0943215	0.0952839	0.0952839	0.0909528	0.0846968
	12	0.0981713	0.0962464	0.0952839	0.0972089	0.0981713	0.093359	0.0895091	0.0890279	0.0885467	0.0866218	0.0856593	0.0866218	0.0866218	0.0885467	0.0885467	0.0885467	0.0846968
	13	0.0952839	0.0952839	0.0972089	0.0962464	0.093359	0.0866218	0.0846968	0.0837344	0.0846968	0.0818094	0.080847	0.0818094	0.0827719	0.0866218	0.0875842	0.0875842	0.0827719
	14		0.0943215	0.0952839	0.0923965	0.0875842	0.0818094	0.0818094	0.0846968	0.0818094	0.0798845	0.0798845	0.0798845	0.080847	0.0798845	0.0856593	0.0837344
	15			0.0904716	0.0875842	0.0827719	0.0818094	0.080847	0.080847	0.080847	0.080847	0.0798845	0.0798845	0.0798845	0.0798845	0.080847
	16				0.0866218	0.0818094	0.0798845	0.0798845	0.080847	0.0798845	0.080847	0.0798845	0.078922	0.0798845	0.080847
	17					0.0827719	0.080847	0.0818094	0.0818094	0.0827719	0.0818094	0.0818094	0.0818094	0.0818094
6	1					0.100096	0.102984	0.102021	0.102984	0.102984	0.101059	0.101059	0.101059	0.100096					6																		6
	2				0.100096	0.100096	0.102021	0.102021	0.101059	0.102021	0.101059	0.101059	0.102984	0.101059	0.102021
0.00744241	3			0.0991338	0.100096	0.101059	0.102021	0.102021	0.102021	0.101059	0.100096	0.102021	0.0991338	0.101059	0.100096	0.100096
	4		0.0972089	0.0981713	0.0991338	0.100096	0.100096	0.100096	0.102021	0.100096	0.100096	0.100096	0.100096	0.100096	0.0991338	0.102021	0.0914341
	5	0.0972089	0.0972089	0.0981713	0.100096	0.0991338	0.100577	0.0991338	0.100096	0.100096	0.100096	0.0991338	0.0981713	0.0991338	0.0991338	0.102021	0.0991338	0.0895091
	6	0.0972089	0.0981713	0.0972089	0.0981713	0.0981713	0.0991338	0.100096	0.0991338	0.101059	0.100096	0.101059	0.0991338	0.0981713	0.0991338	0.0981713	0.100096	0.0899904
	7	0.0967276	0.0952839	0.0991338	0.0991338	0.0991338	0.0972089	0.0972089	0.0972089	0.0991338	0.0991338	0.100096	0.0991338	0.0972089	0.0972089	0.0972089	0.100096	0.0904716
	8	0.0981713	0.0981713	0.0991338	0.100096	0.101059	0.0981713	0.0952839	0.093359	0.0952839	0.100096	0.0991338	0.0991338	0.0991338	0.0981713	0.0962464	0.0962464	0.0914341
	9	0.0981713	0.0981713	0.0991338		0.0991338	0.0991338	0.0943215	0.0914341	0.0914341	0.0991338	0.0981713	0.0991338	0.0991338	0.0991338	0.0972089	0.0962464	0.0885467
	10	0.0981713	0.0972089	0.0991338	0.0981713	0.0991338	0.0981713	0.0943215	0.0914341	0.0895091	0.0952839	0.0991338	0.0981713	0.0981713	0.0972089	0.0962464	0.0943215	0.0861405
	11	0.0952839	0.0962464	0.0972089	0.0981713	0.0962464	0.0976901	0.0914341	0.0904716	0.0904716	0.0904716	0.0914341	0.0952839	0.0962464	0.0962464	0.093359	0.0923965	0.0837344
	12	0.0962464	0.0952839	0.0943215	0.0972089	0.0972089	0.0962464	0.0875842	0.0895091	0.0895091	0.0885467	0.0866218	0.0866218	0.0875842	0.0895091	0.0875842	0.0875842	0.0837344
	13	0.0962464	0.0952839	0.0952839	0.0952839	0.093359	0.0875842	0.0866218	0.0846968	0.0846968	0.0827719	0.080847	0.080847	0.080847	0.0856593	0.0875842	0.0875842	0.0813282
	14		0.0962464	0.0943215	0.0909528	0.0856593	0.0818094	0.0827719	0.0827719	0.0827719	0.080847	0.0798845	0.0798845	0.080847	0.0818094	0.0846968	0.0837344
	15			0.0875842	0.0856593	0.080847	0.0798845	0.0818094	0.0818094	0.080847	0.0798845	0.0798845	0.0794033	0.0798845	0.078922	0.080847
	16				0.0846968	0.080847	0.0798845	0.0798845	0.0818094	0.080847	0.0798845	0.078922	0.078922	0.078922	0.080847
	17					0.0827719	0.0818094	0.080847	0.0818094	0.0818094	0.080847	0.080847	0.0798845	0.0818094
7	1					0.100096	0.103946	0.102984	0.101059	0.101059	0.101059	0.101059	0.101059	0.100096					7																		7
	2				0.100096	0.101059	0.102984	0.102984	0.102984	0.101059	0.101059	0.100577	0.101059	0.101059	0.102021
	3			0.0991338	0.100096	0.100096	0.102021	0.102021	0.101059	0.101059	0.100096	0.100096	0.100096	0.0981713	0.0991338	0.0981713
	4		0.0981713	0.0981713	0.099615	0.100096	0.100096	0.101059	0.102984	0.101059	0.0991338	0.100096	0.100096	0.0991338	0.0991338	0.0991338	0.0923965
	5	0.0981713	0.0991338	0.100096	0.100096	0.100096	0.100096	0.100096	0.100577	0.101059	0.100096	0.0991338	0.0981713	0.0991338	0.0991338	0.0981713	0.0962464	0.0904716
	6	0.0972089	0.0991338	0.0981713	0.100096	0.100096	0.0991338	0.0991338	0.100096	0.100096	0.100096	0.100096	0.100096	0.0991338	0.0972089	0.0952839	0.0962464	0.0890279
	7	0.0952839	0.0952839	0.0981713	0.0981713	0.0981713	0.0981713	0.0972089	0.0981713	0.0991338	0.100096	0.100096	0.100096	0.0991338	0.0972089	0.0962464	0.0952839	0.0895091
	8	0.0972089	0.0972089	0.0981713	0.0991338	0.0981713	0.0972089	0.0962464	0.093359	0.0943215	0.100577	0.0991338	0.0991338	0.0981713	0.0962464	0.0943215	0.0952839	0.0895091
	9	0.0986526	0.0981713	0.0972089		0.0991338	0.0972089	0.0952839	0.0914341	0.0914341	0.0962464	0.0972089	0.0981713	0.0981713	0.0981713	0.093359	0.0952839	0.0885467
	10	0.0991338	0.0991338	0.0981713	0.0972089	0.0962464	0.0981713	0.093359	0.0923965	0.0895091	0.0972089	0.0972089	0.0962464	0.0972089	0.0962464	0.0943215	0.0923965	0.0856593
	11	0.0972089	0.0981713	0.0981713	0.0972089	0.0991338	0.0972089	0.0904716	0.0904716	0.0885467	0.0895091	0.0895091	0.093359	0.093359	0.093359	0.0914341	0.0875842	0.0818094
	12	0.0972089	0.0962464	0.0962464	0.0972089	0.0981713	0.0928778	0.0866218	0.0875842	0.0875842	0.0866218	0.0846968	0.0866218	0.0866218	0.0866218	0.0856593	0.0856593	0.0818094
	13	0.0943215	0.0943215	0.0952839	0.0962464	0.0948027	0.0875842	0.0846968	0.0827719	0.0837344	0.0798845	0.0798845	0.0798845	0.080847	0.0856593	0.0856593	0.0866218	0.078922
	14		0.0952839	0.0952839	0.093359	0.0866218	0.0818094	0.0818094	0.0837344	0.0818094	0.078922	0.078922	0.0798845	0.078922	0.0798845	0.0837344	0.0827719
	15			0.0895091	0.0856593	0.080847	0.0803657	0.080847	0.0798845	0.0798845	0.0798845	0.0779596	0.078922	0.078922	0.078922	0.0798845
	16				0.0846968	0.0798845	0.080847	0.0798845	0.080847	0.078922	0.078922	0.078922	0.0779596	0.078922	0.078922
	17					0.080847	0.0798845	0.0798845	0.0813282	0.0827719	0.0818094	0.0798845	0.078922	0.0798845
8	1					0.102021	0.102984	0.102984	0.102021	0.101059	0.102021	0.102984	0.101059	0.100577					8																		8
	2				0.100096	0.101059	0.100096	0.102984	0.102984	0.102021	0.102984	0.102984	0.101059	0.101059	0.101059
0.00749203	3			0.0981713	0.100096	0.101059	0.102984	0.102021	0.102502	0.102021	0.102021	0.101059	0.0981713	0.101059	0.0991338	0.100096
	4		0.0972089	0.0981713	0.0991338	0.100096	0.101059	0.102021	0.102021	0.100096	0.101059	0.101059	0.100096	0.100096	0.0991338	0.101059	0.0943215
	5	0.0981713	0.0981713	0.0991338	0.101059	0.100096	0.101059	0.101059	0.101059	0.102021	0.102021	0.100096	0.0981713	0.101059	0.100096	0.0991338	0.100096	0.0923965
	6	0.0981713	0.0991338	0.101059	0.100096	0.101059	0.099615	0.0991338	0.100096	0.102021	0.102021	0.101059	0.101059	0.0981713	0.0981713	0.0962464	0.0991338	0.0914341
	7	0.0962464	0.0962464	0.0991338	0.100096	0.0981713	0.0962464	0.0981713	0.0991338	0.101059	0.101059	0.100096	0.0991338	0.0981713	0.0972089	0.0972089	0.0962464	0.0904716
	8	0.0981713	0.0991338	0.100096	0.0991338	0.0991338	0.0972089	0.0952839	0.0943215	0.0952839	0.100096	0.100096	0.0981713	0.0962464	0.0976901	0.0952839	0.0962464	0.0904716
	9	0.0981713	0.0981713	0.100096		0.0991338	0.100096	0.0962464	0.0923965	0.0914341	0.099615	0.0991338	0.0991338	0.0991338	0.0981713	0.0943215	0.0952839	0.0904716
	10	0.0981713	0.0981713	0.0981713	0.0991338	0.100096	0.100096	0.0962464	0.0914341	0.0904716	0.0972089	0.0981713	0.0972089	0.0972089	0.0972089	0.0943215	0.0952839	0.0885467
	11	0.0972089	0.0972089	0.0981713	0.0991338	0.0991338	0.0991338	0.093359	0.0914341	0.0895091	0.0895091	0.0904716	0.0914341	0.0962464	0.0952839	0.0923965	0.0904716	0.0837344
	12	0.0962464	0.0943215	0.0952839	0.0981713	0.100096	0.0952839	0.0885467	0.0885467	0.0895091	0.0885467	0.0866218	0.0866218	0.0861405	0.0885467	0.0875842	0.0885467	0.0846968
	13	0.0972089	0.0962464	0.0972089	0.0952839	0.0952839	0.0875842	0.0856593	0.0846968	0.0846968	0.0818094	0.0818094	0.0818094	0.0827719	0.0856593	0.0866218	0.0875842	0.0818094
	14		0.0962464	0.0943215	0.0943215	0.0866218	0.0827719	0.0827719	0.0846968	0.0827719	0.080847	0.080847	0.080847	0.080847	0.0818094	0.0856593	0.0837344
	15			0.0904716	0.0856593	0.080847	0.0798845	0.080847	0.080847	0.080847	0.080847	0.0798845	0.0798845	0.080847	0.0798845	0.080847
	16				0.0856593	0.0798845	0.0798845	0.080847	0.0818094	0.080847	0.080847	0.0798845	0.078922	0.0779596	0.0798845
	17					0.0827719	0.0827719	0.080847	0.0818094	0.0827719	0.0827719	0.080847	0.080847	0.080847
9	1					0.102984	0.104427	0.102984	0.104909	0.103946	0.103946	0.103946	0.102984	0.102021					9																		9
	2				0.102021	0.102984	0.102021	0.102984	0.104909	0.102984	0.102984	0.102984	0.102984	0.102021	0.101059
0.00727049	3			0.100096	0.101059	0.101059	0.102021	0.103465	0.104909	0.103946	0.103946	0.102984	0.10154	0.102984	0.102021	0.100096
	4		0.0991338	0.0991338	0.101059	0.101059	0.100096	0.101059	0.102984	0.101059	0.101059	0.102021	0.102021	0.100577	0.101059	0.101059	0.0952839
	5	0.0991338	0.0991338	0.101059	0.102021	0.101059	0.100096	0.0991338	0.101059	0.100096	0.102021	0.101059	0.102984	0.102021	0.101059	0.0991338	0.0981713	0.0914341
	6	0.100096	0.102021	0.101059	0.101059	0.101059	0.0991338	0.100096	0.100096	0.100096	0.101059	0.102984	0.102021	0.101059	0.0991338	0.0981713	0.100096	0.0914341
	7	0.0981713	0.0991338	0.101059	0.102021	0.100096	0.0976901	0.0981713	0.0991338	0.0991338	0.100096	0.101059	0.101059	0.101059	0.0991338	0.0991338	0.0991338	0.0923965
	8	0.101059	0.101059	0.101059	0.102502	0.101059	0.0981713	0.0952839	0.0952839	0.0962464	0.102021	0.101059	0.100577	0.0991338	0.100096	0.0972089	0.0972089	0.0923965
	9	0.102984	0.100096	0.100577		0.100096	0.0991338	0.0972089	0.0943215	0.0923965	0.101059	0.100096	0.0991338	0.0991338	0.0981713	0.0943215	0.0957652	0.0895091
	10	0.102021	0.100096	0.0991338	0.100096	0.100096	0.0991338	0.0952839	0.093359	0.0904716	0.102021	0.100096	0.0991338	0.0981713	0.0991338	0.0943215	0.0952839	0.0895091
	11	0.0981713	0.0991338	0.0991338	0.0991338	0.100096	0.0991338	0.093359	0.093359	0.0904716	0.0914341	0.0923965	0.0972089	0.0962464	0.0962464	0.0923965	0.0923965	0.0866218
	12	0.0981713	0.0972089	0.0972089	0.0991338	0.0981713	0.0952839	0.0904716	0.0904716	0.0914341	0.0904716	0.0875842	0.0885467	0.0885467	0.0895091	0.0875842	0.0895091	0.0856593
	13	0.0952839	0.0962464	0.0957652	0.0962464	0.0972089	0.0885467	0.0856593	0.0856593	0.0856593	0.0837344	0.0827719	0.0827719	0.0846968	0.0885467	0.0866218	0.0885467	0.0846968
	14		0.0952839	0.0962464	0.0952839	0.0866218	0.0837344	0.0837344	0.0846968	0.0842156	0.0818094	0.0818094	0.0827719	0.0827719	0.0827719	0.0875842	0.0866218
	15			0.0923965	0.0885467	0.0837344	0.0818094	0.0827719	0.0827719	0.0818094	0.0818094	0.0818094	0.0818094	0.0827719	0.0818094	0.0837344
	16				0.0885467	0.0827719	0.080847	0.0827719	0.0837344	0.0827719	0.0818094	0.080847	0.080847	0.080847	0.0827719
	17					0.0846968	0.0846968	0.0827719	0.0827719	0.0846968	0.0846968	0.0827719	0.0827719	0.0818094
10	1					0.102984	0.102984	0.103946	0.102984	0.103946	0.103946	0.102021	0.101059	0.100096					10																		10
	2				0.102021	0.102021	0.102984	0.103946	0.103946	0.102984	0.102984	0.101059	0.103946	0.102021	0.101059
0.00736912	3			0.0991338	0.101059	0.102021	0.104909	0.102984	0.103946	0.102984	0.102021	0.102021	0.102021	0.102984	0.101059	0.101059
	4		0.100096	0.100096	0.099615	0.102021	0.102021	0.102021	0.103946	0.102021	0.10154	0.102021	0.103946	0.101059	0.0991338	0.102984	0.0952839
	5	0.0991338	0.100096	0.101059	0.101059	0.101059	0.101059	0.101059	0.102984	0.102984	0.102984	0.102984	0.102984	0.102021	0.0991338	0.101059	0.100096	0.093359
	6	0.0991338	0.100096	0.102021	0.101059	0.101059	0.101059	0.099615	0.102021	0.101059	0.101059	0.10154	0.101059	0.102021	0.100096	0.0981713	0.100096	0.0943215
	7	0.0981713	0.0981713	0.100096	0.101059	0.100096	0.0991338	0.0981713	0.0981713	0.0991338	0.0991338	0.100577	0.102021	0.102021	0.101059	0.0991338	0.100577	0.0943215
	8	0.100096	0.100096	0.101059	0.101059	0.100096	0.0981713	0.0952839	0.0943215	0.0943215	0.101059	0.102984	0.102021	0.101059	0.100096	0.0981713	0.0981713	0.0943215
	9	0.100096	0.0991338	0.0991338		0.101059	0.0991338	0.0972089	0.093359	0.0914341	0.101059	0.0991338	0.0991338	0.100096	0.101059	0.0962464	0.0991338	0.0914341
	10	0.100096	0.0991338	0.100096	0.100096	0.0991338	0.100577	0.0962464	0.093359	0.0914341	0.101059	0.0991338	0.0972089	0.0981713	0.0991338	0.0972089	0.0952839	0.0895091
	11	0.0991338	0.0991338	0.100096	0.100096	0.100096	0.0991338	0.0923965	0.0923965	0.0914341	0.0914341	0.0923965	0.0952839	0.0962464	0.0952839	0.093359	0.093359	0.0875842
	12	0.0981713	0.0991338	0.0981713	0.100096	0.100096	0.0952839	0.0895091	0.0895091	0.0914341	0.0895091	0.0885467	0.0895091	0.0880654	0.0904716	0.0885467	0.0885467	0.0866218
	13	0.0981713	0.0981713	0.0976901	0.0981713	0.0952839	0.0875842	0.0866218	0.0846968	0.0856593	0.0846968	0.0837344	0.0827719	0.0827719	0.0885467	0.0885467	0.0904716	0.0827719
	14		0.0952839	0.0952839	0.0943215	0.0875842	0.0846968	0.0837344	0.0846968	0.0846968	0.0827719	0.0818094	0.0818094	0.0818094	0.0827719	0.0866218	0.0856593
	15			0.0914341	0.0875842	0.0827719	0.0827719	0.0827719	0.0827719	0.0837344	0.0822907	0.0818094	0.0818094	0.080847	0.080847	0.0837344
	16				0.0866218	0.0837344	0.0827719	0.0818094	0.0827719	0.0827719	0.0822907	0.0798845	0.0798845	0.0798845	0.0818094
	17					0.0846968	0.0827719	0.0822907	0.0837344	0.0837344	0.0827719	0.0827719	0.0818094	0.0818094

## Sheet: DISS
MaxDissociation
Signals of insufficient quality were excluded from the property maps. Signals could be rejected based on noise low amplitude, large artefact or ventricluar farfields that could not be substracted.
		1	2	3	4	5	6	7	8	9	10	11	12	13	14	15	16	17
1	1					21.2525	22.4	20.2399	18.975	19.9966	20.6661	24.2459	25.1186	20.6356					1																		1
	2				23.4121	25.8912	26.6787	26.0581	24.8465	25.5082	25.6099	27.8918	28.2692	24.7712	23.3752
0.00779495	3			22.2932	25.8412	26.316	28.1065	27.6039	28.6546	25.9659	24.6234	26.0486	26.2367	27.811	26.4204	24.2588
	4		20.165	23.0481	25.6264	26.9919	26.9558	28.1472	28.1329	24.8869	22.7299	24.9776	26.0309	26.9582	27.0307	26.5265	23.0257
	5	16.8417	20.9773	23.7027	26.135	27.1149	25.0567	25.2516	26.1984	24.6677	24.3253	25.7749	26.2271	27.3328	28.4766	29.0292	27.2115	20.2973
	6	16.6167	20.8104	24.6894	27.9542	28.1006	26.2811	25.2233	25.7476	26.2496	25.2682	24.4314	24.8371	26.8003	28.645	29.2839	28.9124	23.546
	7	19.1558	22.9497	26.2116	27.1778	26.7512	25.7033	25.7258	27.0499	28.4911	27.6191	23.2869	25.1216	25.9628	28.4432	27.6834	28.3455	23.1224
	8	19.718	22.8207	24.6201	25.2935	24.0048	25.1552	23.0142	26.5944	32.6708	33.7138	29.2039	26.0358	28.7955	30.0239	26.4436	27.2814	21.9036
	9	20.432	23.1072	23.2913		25.8201	28.0299	24.8701	21.7637	29.991	36.3507	31.9126	25.3478	27.4944	28.8268	26.9569	27.5935	23.4367
	10	20.7758	22.9528	21.5122	22.4959	25.4951	29.1987	26.6065	22.5302	27.9288	33.4526	33.4506	25.7666	27.5549	28.5585	27.5231	28.2377	23.5223
	11	20.7701	24.0676	23.1382	22.859	26.6456	29.5433	26.4541	22.8144	22.4153	29.0782	29.0498	26.958	26.9684	27.2726	26.5483	26.7019	21.3445
	12	21.6986	24.1591	23.5759	24.8347	28.6238	29.4359	25.8408	23.8302	22.585	24.4877	24.2407	22.2305	23.909	23.6781	22.8596	23.1698	18.7103
	13	20.6272	23.0911	25.1264	27.6054	30.382	28.4343	24.9915	23.7052	22.86	21.0375	19.5886	18.6471	19.6156	20.5414	21.5866	20.4631	16.705
	14		24.4211	27.0676	28.7481	27.1616	24.2442	22.7714	21.9986	20.4152	18.2825	17.0804	16.1084	17.0782	19.797	20.5966	17.8394
	15			24.64	24.411	22.4631	19.5762	18.8697	18.8639	18.9973	17.0492	16.5345	15.8123	16.4242	18.3315	17.522
	16				19.2874	17.8735	17.0172	16.1787	15.7575	15.9075	16.807	16.0424	15.51	14.2061	15.7831
	17					14.928	13.757	12.3053	12.5231	14.0736	13.8121	12.951	12.4893	10.7122
2	1					22.1331	22.2172	20.2496	20.0315	19.2194	19.8355	24.0264	25.8115	21.1815					2																		2
	2				24.966	26.7808	25.9984	26.3721	25.3355	24.9411	24.6266	27.2244	29.2549	26.6032	23.9901
0.0074415	3			23.5696	26.7524	27.2646	27.6052	27.4547	28.603	26.2042	23.8081	26.154	26.873	28.8409	27.1623	25.6134
	4		21.5305	24.9856	26.4911	27.0307	27.7024	28.1401	28.7712	25.8849	23.3569	24.9405	26.0194	26.5283	27.7101	26.6981	23.531
	5	18.41	22.6402	25.6248	26.4708	27.0714	25.7747	25.555	26.1612	25.1555	24.2019	25.7817	25.7965	27.2776	27.5427	28.0747	27.1048	20.9457
	6	18.2235	22.2107	25.7827	28.1047	27.6732	26.7034	26.0759	25.5396	25.9326	24.4571	24.0832	24.9792	25.5815	27.112	27.3381	28.5176	24.3259
	7	19.5895	23.3774	26.1748	27.7013	27.6484	28.0478	28.1622	28.3896	29.0016	27.2298	23.3549	25.2399	26.3766	26.3748	25.3215	27.3461	24.0325
	8	19.9532	23.2013	24.8779	25.4618	25.6435	27.2897	25.2362	27.0674	32.8247	33.8339	29.4537	26.2339	27.3489	27.9306	24.5237	25.5272	22.3725
	9	20.2752	22.3863	23.5324		26.266	29.2978	25.9138	22.6099	30.2089	35.2921	31.9968	25.7122	26.7285	27.1314	24.5255	25.859	23.2568
	10	20.3614	22.7896	20.1759	22.2702	25.168	30.5886	27.4869	22.9419	28.0235	33.6463	33.0556	26.3071	26.0866	27.1342	25.7909	27.1931	22.9683
	11	20.5477	23.5691	22.7476	23	25.955	29.9382	27.1261	23.0868	23.2157	28.4265	28.2436	26.253	26.1739	26.8231	25.3354	26.6817	21.5662
	12	21.9388	24.056	23.6941	25.1224	28.6533	29.1053	25.7323	23.5633	23.4985	24.1636	22.7832	22.2882	24.1429	23.875	22.4731	22.9561	19.3065
	13	21.5175	24.456	26.8878	28.5936	29.7601	26.9871	23.706	22.7329	21.7419	20.3741	18.9373	17.786	19.0985	20.6341	22.2387	20.786	17.3026
	14		24.9558	27.8929	29.1341	27.8182	23.6241	21.7981	20.3604	19.2438	18.1827	17.4008	16.4263	17.442	20.1438	21.1133	18.4332
	15			24.9288	25.1233	22.5124	19.8456	18.735	17.855	18.083	16.847	17.0555	16.0659	16.3678	17.5095	17.1448
	16				19.1796	17.9848	17.3822	16.6667	15.847	15.7399	16.8668	16.4765	15.7409	14.6414	15.1395
	17					15.0979	14.4584	13.7565	13.1936	14.3179	14.2871	12.8921	13.063	11.144
3	1					22.5349	23.0938	21.8079	19.8588	20.1951	20.4661	23.6209	25.1817	21.057					3																		3
	2				23.8393	26.6534	27.4901	26.162	25.0507	25.0851	25.6672	27.8276	28.548	25.6042	24.0224
0.00732629	3			23.6032	26.5896	27.6738	27.4983	27.3432	28.1592	25.7919	25.1743	25.7496	27.5484	28.0114	26.107	24.2456
	4		20.9777	22.9952	25.3768	27.144	27.141	26.9471	27.3028	25.9477	24.2362	26.0862	27.2192	28.1011	28.5971	26.4064	22.3997
	5	17.3114	21.034	23.7452	25.5845	26.7854	25.2177	24.4417	25.8967	25.9028	25	26.7568	27.4116	27.9276	28.7013	29.2456	26.782	19.8886
	6	17.44	21.7746	25.6563	28.0886	28.1294	27.179	25.4797	25.7127	26.8964	23.798	23.7724	23.8948	26.1068	28.4032	28.8156	28.2775	23.2991
	7	19.6989	23.2596	25.6364	26.6161	26.638	26.7274	26.2859	27.5527	29.0272	26.099	21.9462	22.9642	25.5499	27.9601	26.9019	28.3519	22.8133
	8	20.3222	23.4019	25.0624	25.3194	24.4455	24.9729	23.4518	26.3926	32.472	33.0341	28.7318	25.3296	27.9501	28.371	25.9186	27.2101	21.5636
	9	21.8237	24.1718	24.5032		25.6006	28.0896	24.7504	21.8423	30.942	34.9248	30.7431	24.845	26.1256	27.6177	25.9043	26.6115	22.8309
	10	21.8517	24.4534	23.2125	24.0952	25.0877	29.2512	26.0362	22.1897	27.0045	33.1103	33.1787	26.2588	26.5331	27.7741	26.4317	27.0768	22.162
	11	20.767	23.9936	23.6194	23.893	26.8551	28.9649	26.5805	22.5706	22.8249	28.5432	29.0945	26.8109	27.5054	26.9109	25.6758	26.1493	21.6781
	12	21.1727	23.2291	23.5158	24.3434	27.8013	29.4176	26.5826	24.6076	23.8964	24.1584	24.3672	23.4978	25.3824	23.6885	22.5997	23.2757	19.4325
	13	21.139	23.9778	25.9873	28.2044	29.4037	26.7997	25.0128	23.3769	22.7397	21.4455	20.4077	19.2673	20.0958	21.0015	22.4642	20.7755	16.8121
	14		25.3947	27.6121	28.3654	27.8443	24.7447	22.2718	20.7994	20.5063	18.9103	17.6774	17.1147	17.5305	20.5103	21.8942	19.4907
	15			23.8834	24.2431	22.6556	20.6923	19.3412	19.0389	19.373	17.8579	17.414	16.0723	16.6703	17.8612	18.5222
	16				19.1605	18.1694	18.0878	16.9015	16.4386	16.3397	18.1245	16.7028	15.909	14.4646	15.3731
	17					15.0369	14.5187	13.5089	13.7292	15.131	15.5787	13.6374	12.8918	10.9725
4	1					21.5756	22.7885	20.9933	19.6755	20.3886	19.6178	23.9419	24.8633	19.4704					4																		4
	2				23.7203	26.2584	26.6616	25.8127	24.7694	25.1603	25.4741	28.1733	27.9587	24.2029	23.1005
0.00767607	3			21.4007	25.2729	26.5252	27.4806	27.1296	27.9255	25.8497	24.4926	27.201	27.5528	26.4661	25.2039	24.0615
	4		18.7005	21.6558	25.5057	25.6474	27.4415	28.0231	28.806	24.5825	23.7313	25.4671	26.5728	26.3798	26.4175	25.4767	23.2374
	5	15.9918	19.8033	22.6766	24.3795	25.3977	25.5783	25.5443	26.1814	24.4498	25.0915	26.4789	26.2521	27.4478	27.0938	27.4853	27.3387	21.0427
	6	16.2255	20.369	24.7053	26.8826	26.6361	26.5304	25.5237	25.7578	26.4658	24.9852	24.1388	23.9754	25.7431	27.1454	26.9581	28.077	24.0469
	7	18.1099	22.475	26.0699	26.8109	25.2651	26.7492	26.6784	28.8958	28.54	26.1496	22.1535	23.2086	25.8163	27.342	26.4726	27.208	23.7485
	8	19.4375	22.9655	24.7884	25.3883	24.1443	25.7857	24.4851	27.607	32.4217	33.1601	28.262	24.1104	26.7215	27.8689	25.5568	27.2061	22.3908
	9	19.0741	22.0643	23.5508		26.0342	27.9568	25.3318	22.304	29.9354	35.7647	31.2475	24.1576	25.4796	26.852	26.2954	27.8363	23.4262
	10	19.1957	22.0245	20.4909	22.402	25.1482	29.4662	26.9263	22.607	27.8496	33.2901	33.1356	26.2217	26.5233	27.6264	27.5456	28.2293	22.6525
	11	20.2393	23.2961	23.2382	23.0758	26.3235	30.0178	27.3061	24.1207	23.4027	29.2481	29.1101	26.4404	26.746	27.411	26.631	26.2086	21.302
	12	21.816	23.7528	23.231	24.5928	29.1109	30.739	27.7867	24.708	23.7179	23.8253	24.0044	22.3527	24.9509	24.8051	22.5405	23.7666	18.6623
	13	20.5505	23.5856	26.2604	28.5105	30.1309	28.7278	25.8103	23.4872	22.5195	21.453	19.7059	17.5377	19.0813	21.3426	21.8886	20.5465	16.9957
	14		24.6101	28.1057	28.8768	27.4572	23.9466	22.3037	21.2729	19.9675	18.3624	17.208	16.3736	17.2316	19.8615	21.0723	19.2023
	15			24.7238	24.4585	22.8352	19.0529	17.7955	18.2008	18.2216	17.7619	17.0109	16.0529	16.5975	18.2145	17.7049
	16				18.8611	17.9958	16.9684	15.6825	15.6204	16.0056	16.9295	16.7514	15.4599	14.8376	15.7441
	17					14.4023	13.9901	12.1692	12.2973	13.7013	14.2251	13.4534	12.6171	10.9249
5	1					22.3864	21.9983	20.245	18.8791	19.3765	20.1373	23.5349	24.7332	20.1327					5																		5
	2				24.9088	26.6546	26.8536	26.3593	25.0281	25.5017	25.9901	27.586	28.3557	24.7801	23.5024
0.00729301	3			23.9363	27.1098	28.165	28.5113	27.3164	28.0824	25.7967	24.8407	25.8444	26.1997	26.63	25.7974	24.3789
	4		20.3706	23.2424	27.0324	27.0939	27.984	27.8894	26.8887	24.5205	23.1452	24.5823	25.7443	26.6258	27.5987	26.4984	23.2689
	5	17.3099	21.3008	23.3205	25.7464	26.5122	24.4169	25.0918	25.3724	24.3506	24.067	25.1505	25.8822	27.1246	27.4646	28.6488	26.4453	20.149
	6	17.0463	20.883	25.5032	27.8476	28.0649	26.6704	25.8666	26.6167	25.6256	24.2963	23.7765	23.7656	25.7148	27.4871	27.5111	28.3115	23.2687
	7	20.0734	23.7461	26.0304	28.0705	27.7818	26.612	26.5552	28.123	27.7925	25.4376	22.0487	23.5325	25.0421	26.6451	26.3574	27.8587	23.1533
	8	21.2801	24.0981	24.9331	26.1566	25.1677	26.2811	24.5199	27.3026	32.0274	32.2386	27.6656	25.0016	26.8797	27.5024	25.7024	26.8482	22.3674
	9	21.1076	23.949	24.5721		27.2047	28.825	25.4426	21.8606	30.4517	35.9181	31.2153	25.8239	26.2305	26.4048	25.6856	27.6524	23.53
	10	21.3632	23.4551	21.6055	23.3323	25.4395	29.4259	26.6006	22.5338	28.0653	34.8738	34.6806	26.9491	26.3433	27.1331	26.8752	28.1266	22.8146
	11	22.0478	24.7687	24.4672	24.0288	27.1454	29.2657	26.6435	23.0228	23.4703	29.6444	30.7881	27.2773	26.7979	26.7207	26.4146	27.1226	22.1638
	12	24.0877	25.5994	24.0549	26.1854	29.177	29.1055	26.8534	23.7459	22.4138	23.9784	24.8106	23.3184	24.6643	24.5389	23.5147	24.0293	19.0826
	13	22.5142	24.9522	27.7138	29.5306	30.196	28.1609	25.0694	22.9902	22.3713	20.8591	20.2941	18.5616	20.239	22.0461	22.5265	20.8611	17.5154
	14		26.8166	28.7913	28.9742	27.0509	23.9447	22.3287	21.7195	20.4042	19.4722	17.8939	17.2398	18.2558	20.2215	21.5404	18.2881
	15			24.3694	23.5453	22.3743	19.0893	18.7548	19.218	18.9117	17.738	16.7314	15.9553	16.173	17.4095	17.7053
	16				19.0291	18.0864	17.1658	16.4496	16.132	16.4167	16.9008	16.4892	15.5221	14.1407	14.9643
	17					14.4698	14.5138	13.814	13.216	14.4503	13.7875	13.1347	12.5164	10.5152
6	1					21.8078	22.2521	21.1857	19.7558	19.9718	20.4046	22.8388	23.9463	19.2516					6																		6
	2				24.2098	26.2873	27.2361	25.5815	24.8597	25.647	25.2714	26.7241	27.7554	23.782	22.1785
0.00744241	3			22.7271	26.0064	26.7317	27.731	27.068	27.5911	25.4098	24.5951	26.5065	26.8068	26.7253	24.849	23.9465
	4		20.3201	23.9936	26.2532	26.9597	27.6624	27.8074	26.6279	23.1607	23.3538	26.4919	26.6378	26.272	26.6656	26.2426	23.628
	5	17.1754	21.6274	24.1308	25.7317	26.4733	25.4847	25.2645	24.7423	23.4392	23.8646	25.9345	26.3317	26.5731	27.727	29.3945	27.516	20.7177
	6	17.434	21.8177	25.7949	27.3955	27.8464	26.3113	25.3333	25.2152	25.0992	23.7504	24.3372	23.2899	26.0853	27.246	28.2846	29.1656	23.5922
	7	19.285	22.8879	25.8933	27.2913	26.7109	26.8654	27.0925	28.1972	27.8964	25.2816	22.767	23.6135	24.8214	26.3446	26.4714	28.634	23.5985
	8	21.0413	24.274	24.5466	25.6288	24.3055	26.4513	24.8853	26.9588	32.3272	32.3404	28.0374	23.7954	26.1387	27.3846	25.3049	27.2429	22.9445
	9	21.5433	24.6342	24.8446		25.0512	27.465	25.7034	22.8348	30.2786	35.1244	29.7868	24.129	25.3301	25.6504	25.6352	27.1746	23.6988
	10	22.4388	24.1624	22.931	23.7984	25.2385	28.1984	26.3168	23.2066	28.2758	33.3872	33.0769	25.516	25.7604	26.6086	26.5795	28.2585	23.7088
	11	21.2857	24.4685	24.4706	23.992	26.212	29.1134	27.0136	22.8048	24.3205	28.9718	29.23	26.4845	26.805	27.1706	25.8779	27.3591	22.0423
	12	22.6148	23.8062	24.0918	25.8594	29.1833	30.3058	26.5718	24.2175	22.87	23.79	24.4957	23.5381	25.2583	24.9971	22.8699	23.2222	18.7341
	13	20.4527	23.522	26.1638	28.6542	30.263	27.9029	26.2221	23.8901	22.8161	21.1411	20.0095	19.0965	20.4781	21.1447	22.5167	21.0029	16.7285
	14		24.3062	26.9564	28.7139	27.0978	23.7837	22.6929	21.4798	19.8748	18.8866	17.4316	16.8606	18.3427	20.0259	21.7761	18.9565
	15			23.8438	24.0491	22.6178	19.3957	18.7473	19.2014	18.927	17.5901	16.8999	16.4444	17.1158	18.1253	18.1812
	16				19.0325	18.6204	18	16.7453	16.216	16.269	17.5275	16.4768	16.2904	14.8045	15.849
	17					15.305	14.8174	13.0554	13.3659	14.4938	14.8091	13.0561	12.7507	11.2618
7	1					22.7827	23.2033	20.2867	19.125	19.3908	18.5122	23.8967	24.7218	20.6505					7																		7
	2				23.5521	26.9347	27.5107	25.7171	24.9	24.4829	24.689	27.7122	28.535	24.9741	22.9003
	3			22.0145	25.3067	27.539	27.6088	26.8201	27.6156	25.6629	25.285	26.813	27.9286	27.7632	25.9696	24.4809
	4		21.1344	23.4064	25.4992	26.2985	27.8151	26.4918	27.1273	24.2815	22.6758	26.087	26.9	27.4952	27.3575	25.9079	23.2049
	5	17.7633	21.6238	23.4726	24.9692	25.0097	23.3974	24.522	25.845	23.7541	24.2548	25.454	26.3445	28.088	28.859	28.4824	26.8156	19.6278
	6	17.5646	21.9904	25.2217	26.2929	26.1075	24.8505	24.4927	25.5684	25.9015	24.5547	24.4734	24.4362	26.7668	28.9843	27.9282	28.2	22.6785
	7	20.277	23.6965	25.9427	26.3157	25.4514	26.056	27.1429	29.107	28.8207	27.4698	22.8428	24.2544	26.3897	28.7163	27.3557	27.1244	22.4313
	8	21.0918	24.1474	25.4656	25.1796	23.7965	25.9842	25.1734	28.2369	33.1787	33.3776	28.825	25.4855	27.9413	29.6432	26.943	27.0448	21.9276
	9	21.3014	24.1717	24.6561		25.6346	28.475	26.3369	22.8991	31.7926	35.9047	31.0209	26.0865	28.2632	28.8846	27.3502	28.2131	23.2135
	10	22.6961	25.4003	23.5845	24.5965	26.2683	31.11	28.0489	24.2646	29.1037	35.5132	33.8639	26.8354	27.1765	28.8072	28.8916	28.6976	22.9717
	11	21.5072	25.4776	25.6984	25.0794	27.84	30.8746	28.6667	24.5575	25.629	30.3542	30.2726	26.9493	27.5905	27.7604	27.8141	27.4555	21.4309
	12	21.227	24.8511	24.3003	25.1831	29.1526	30.0664	27.7612	25.4338	23.8996	25.1977	25.9294	24.2696	25.9783	25.7211	23.5396	23.5482	19.2926
	13	20.9423	23.5163	26.3736	28.5925	29.8894	27.7384	26.0423	24.4278	23.2911	21.5441	20.811	18.9123	20.7408	21.7436	22.2716	20.646	16.9257
	14		24.8487	27.1078	28.4809	27.5597	24.3329	22.8973	22.4184	21.0027	19.1941	17.5918	16.7801	18.3755	20.8266	21.7391	19.3798
	15			24.8771	24.6037	23.1294	19.8856	19.829	19.7158	19.5569	17.947	16.9182	16.6182	17.1283	18.86	18.3619
	16				19.6557	18.784	18.6757	16.6671	16.6521	16.8102	17.436	16.7738	15.5238	14.2762	15.7802
	17					15.4477	14.9932	12.9192	13.7407	15.2573	14.7907	13.0938	12.5625	10.4621
8	1					21.8693	21.6448	20.0051	19.9109	19.7934	20.2504	23.1722	24.2135	20.0651					8																		8
	2				24.4765	25.9902	26.3274	25.3731	24.7781	24.3063	24.635	26.3062	27.6809	24.6743	22.8951
0.00749203	3			23.1936	26.347	27.3454	28.2332	27.7668	26.985	24.7723	24.6135	25.8622	26.8768	27.5049	26.328	25.2468
	4		21.118	23.7412	26.2963	27.0374	27.908	27.9786	25.8259	23.5525	21.9722	25.0049	26.3791	27.7094	28.2387	27.4748	24.2355
	5	17.1166	22.1632	24.1659	25.7369	25.4311	24.8567	24.3608	24.9163	23.6033	23.894	25.4016	26.3236	27.6405	28.3452	28.7968	27.6694	21.1254
	6	16.7854	20.9119	25.3252	27.8081	27.1924	25.7101	23.684	24.2871	24.3278	24.6033	23.6444	23.6066	26.4758	27.8312	27.7163	28.7753	23.7771
	7	19.4632	23.573	25.9243	27.879	27.262	26.205	25.7563	27.3752	27.2824	25.6964	22.7919	25.0912	25.8213	27.6799	26.0777	27.3595	22.1913
	8	20.1635	22.6667	24.6742	25.6124	24.5397	25.8447	23.4844	27.0903	32.2269	32.6471	28.8677	25.7059	27.3218	27.6248	25.5903	27.0599	22.3838
	9	20.8441	23.6109	23.7367		25.3654	27.2472	25.405	23.4992	30.3898	35.4799	29.7955	25.1254	26.3903	27.8231	26.337	27.092	23.7761
	10	20.9823	23.3929	22.4631	22.6953	25.5556	29.24	27.0916	23.2402	28.3789	33.9747	32.5913	26.5143	27.1717	28.7071	27.6791	28.4344	23.7726
	11	19.9523	23.6778	23.9021	23.6924	26.7718	29.3958	26.9725	22.8316	25.0712	28.4231	29.117	26.0818	27.891	27.9462	27.134	27.0904	22.3475
	12	20.8418	23.1851	22.4606	24.8336	28.8961	29.8225	26.7279	24.3676	23.2186	23.7303	24.5774	23.9019	24.5438	24.8341	23.3377	23.0703	19.0241
	13	20.3029	22.5556	25.1278	27.5242	29.7589	28.0542	25.4723	24.1511	23.3319	21.5214	20.9193	18.8174	20.144	21.1602	22.0449	19.9186	16.4069
	14		24.7646	27.2399	28.8104	27.1443	24.3408	22.8184	21.9859	20.4401	19.4351	17.8871	17.5978	18.4332	20.1883	20.9231	18.6389
	15			24.6571	24.6537	22.7655	19.4741	18.631	19.2466	19.4829	18.1382	17.6282	16.6278	17.2342	18.7568	18.5825
	16				19.567	17.7712	17.2127	16.5431	16.5815	16.8484	17.6766	16.4	16.6845	15.1758	15.7975
	17					15.4986	15.1466	13.2992	13.542	14.9547	15.0292	13.3159	13.0204	11.4345
9	1					20.7085	21.8673	20.9293	19.0462	19.3547	19.2395	23.0084	24.2309	19.8569					9																		9
	2				23.553	25.6845	26.5597	24.8853	24.0137	23.8693	24.3217	26.7357	28.146	24.0712	22.6623
0.00727049	3			22.5677	25.9174	27.6568	28.2483	27.1551	26.6604	25.2305	24.2204	26.1063	26.5917	27.1148	25.1824	23.491
	4		21.3625	23.4919	26.6531	27.116	28.0504	28.0693	26.5843	24.3186	22.7209	24.3733	26.2745	26.0428	26.8661	25.5446	22.9608
	5	17.5719	22.2101	24.5997	26.1907	27.3371	25.9608	26.1475	25.78	24.4138	25.0533	25.3317	26.6611	27.3537	27.2013	27.5623	25.8608	19.5897
	6	16.7899	20.4443	25.0213	28.2237	28.5805	27.2642	26.5511	25.9221	25.5552	24.1376	24.178	25.1587	26.7993	27.5381	27.2649	27.9301	22.8204
	7	18.6997	21.9259	25.4152	27.3721	27.2414	26.8293	27	27.522	27.2311	25.4811	22.6743	24.3372	26.4328	27.8126	26.624	27.4605	22.5245
	8	20.2036	23.0196	24.7696	24.8731	24.1721	26.0144	23.6969	26.3224	32.4048	33.1827	29.0544	25.1538	27.9433	29.0971	25.981	26.4842	22.2477
	9	20.8089	23.4379	24.023		24.7077	27.4212	25.5506	22.6693	31.3075	35.6775	31.2869	25.2	26.5563	27.6634	26.1121	26.4518	22.9745
	10	21.1236	23.4529	21.9805	22.4885	24.2614	27.7455	26.6917	23.2101	28.1113	35.6591	33.7192	25.8994	26.6304	27.9482	26.8305	26.9828	22.8609
	11	21.1125	24.5897	24.4029	24.0825	26.6029	29.3606	27.9631	23.6534	26.1988	30.5038	31.1667	26.8492	27.6677	28.3803	26.8407	26.468	22.2742
	12	22.2528	25.5943	24.6916	26.513	30.0242	30.4239	27.9416	25.0433	24.2924	24.6403	25.0267	23.5579	25.4492	24.5704	23.5507	23.6303	18.4348
	13	21.3402	23.8971	26.6133	29.0288	30.6165	28.3421	24.9697	24.2849	22.6029	21.6463	20.5632	18.9364	20.602	22.2618	22.6975	20.6987	17.2959
	14		24.4662	28.5332	29.3852	26.4611	23.5369	22.4401	21.8407	20.2461	18.8516	17.3653	17.1032	17.7038	20.4033	21.2573	18.5159
	15			24.5595	24.4436	22.3634	18.8025	18.7265	18.993	18.5837	16.3831	16.4952	16.4171	16.8361	17.6231	17.5014
	16				18.5721	17.602	16.3983	15.5077	15.2658	16.1883	16.694	15.6414	15.2008	14.1635	15.3706
	17					14.4565	13.4915	12.0195	12.2588	13.8409	14.421	12.5684	12.3844	10.3997
10	1					22.234	21.2884	20.9071	18.946	18.4058	18.6263	22.809	24.4594	20.553					10																		10
	2				24.3045	26.407	26.3997	25.545	24.0068	23.0654	23.5849	25.9157	28.4933	26.1931	23.0772
4.36814	3			23.3377	25.7738	26.7562	26.8988	26.0915	25.9444	23.6355	23.0269	25.0667	26.8576	28.6805	26.0462	23.3056
	4		20.9445	24.1424	25.522	26.0427	26.203	25.9933	25.6913	23.2239	22.2769	24.7331	26.3815	26.5181	27.6623	26.405	23.2645
	5	17.3997	21.7008	23.9015	25.449	26.2211	24.5586	24.7574	25.0282	24.1221	24.4683	26.2952	26.6683	27.76	28.6964	28.8684	27.8252	21.0779
	6	16.7803	21.1863	25.5479	27.9214	26.6831	26.2114	25.0681	26.1628	26.419	25.2876	24.4959	23.7201	26.2083	28.2887	27.928	29.1591	24.4261
	7	19.4887	23.618	25.6416	27.2345	26.2463	26.6667	26.7129	27.4718	28.705	27.2149	24.0098	25.3317	26.5504	27.7778	26.4029	27.6467	22.9303
	8	19.4624	23.3713	25.3769	26.1475	24.5798	27.0576	23.9025	26.4674	32.5635	33.5066	29.0448	26.0299	28.2096	29.4894	26.1214	27.2343	22.7457
	9	20.5465	24.1018	24.5425		25.6923	28.1031	24.8887	22.7271	31.5	36.6502	31.2757	25.4927	27.4967	28.4538	25.783	27.9038	23.5091
	10	20.7618	23.2484	22.1454	23.876	25.1408	29.7154	26.5826	23.6498	29.982	35.7409	34.122	26.8416	26.8535	28.0995	27.4413	27.7362	23.0193
	11	21.0049	23.9303	23.2504	23.0759	26.5752	29.8167	27.2922	24.4384	26.6967	30.0253	30.4336	26.2038	28.2438	27.7261	26.4862	26.9073	21.8141
	12	21.2908	23.9936	22.7749	24.4481	29.6189	29.6863	26.9094	25.1958	23.7134	24.1137	24.6327	22.63	24.837	24.1549	22.8452	23.7608	19.3549
	13	21.7771	24.6517	26.168	29.2804	30.4443	27.8233	25.8458	24.0014	22.9784	22.0831	20.3627	18.3955	19.7851	21.1254	22.6348	21.6045	17.4371
	14		24.9558	27.8	28.8016	27.8314	24.9221	22.534	21.8933	20.5696	19.0252	17.4484	17.2338	17.7397	20.3249	21.5799	19.3128
	15			23.0992	23.1923	22.2412	19.8102	19.207	19.6848	19.2165	17.0979	17.1185	15.9823	16.4438	18.0849	18.2045
	16				18.344	18.3544	17.6011	16.4812	16.7608	16.4972	16.8772	15.3257	14.9231	13.8649	15.1688
	17					14.6757	14.0293	13.1051	13.4068	14.688	14.1793	12.2486	11.6869	10.2986

## Sheet: BT
NumberOfStartingPointsBT
Signals of insufficient quality were excluded from the property maps. Signals could be rejected based on noise low amplitude, large artefact or ventricluar farfields that could not be substracted. Breaktrough can only be identified if a contiguous circle of electrodes enclose the electrode of interest. Therefore electrodes at the border or around a missing electrodes are excluded.
	1	1	2	3	4	5	6	7	8	9	10	11	12	13	14	15	16	17
1	2																		1																		1
	3						27	16	15	19	11	11	19
0.00779495	4					23	8	20	13	7	4	14	34	12
	5				10	21	18	24	16	31	9	14	18	19	3
	6			15	14	16	16	21	10	22	12	14	7	8	20	23
	7		21	23	11	14	22	20	14	28	30	22	17	11	13	21	13
	8		30	8	13	9	26	30	20	28	23	22	13	18	20	12	31
	9		18				26	13	26	15	18	17	14	25	10	18	22
	10		14				9	21	17	19		22	15	17	15	19	24
	11		18				19	16	24	30		17	20	17	13	14	21
	12		45	14	11	13	24	11	14	30	11	19	28	21	16	23	12
	13		16	11	20	23	18	36	26	18	16	15	29	10	7	18	26
	14			19	25	31	16	15	11	10	12	4	16	9	1	19
	15				20	20	26	13	17	16	10	9	22	15	7
	16					24	24	13	13	11	18	4	6	7
	17						27	15	11	14	6	8	13
	1
2	2																		2																		2
	3						17	14	15	19	12	14	22
0.0074415	4					22	10	22	22	8	8	23	34	14
	5				17	32	21	20	27	25	17	12	15	10	8
	6			15	6	11	10	27	14	12	10	16	7	4	5	17
	7		20	19	16	15	22	24	17	28	15	14	14	12	7	19	13
	8		34	17	20	10	28	35	20	23	24	29	25	16	23	13	11
	9		26				54	12	39	24	24	15	16	27	16	13	20
	10		20				23	16	13	26		36	7	15	19	18	21
	11		12				17	14	15	36		13	23	15	15	10	20
	12		38	13	7	10	26	20	17	25	10	28	29	14	7	26	21
	13		15	12	14	15	23	36	29	26	20	15	25	8	13	5	41
	14			22	17	18	21	20	17	8	17	13	17	12	15	20
	15				23	21	24	13	13	15	20	8	13	11	16
	16					39	30	16	16	9	10	8	8	8
	17						44	9	16	22	6	13	15
	1
3	2																		3																		3
	3						8	19	13	13	12	10	21
0.00732629	4					23	6	15	15	4	4	23	30	11
	5				21	20	21	14	10	27	11	7	21	10	14
	6			6	12	11	17	24	16	15	12	14	17	10	18	14
	7		21	20	18	11	29	16	26	22	18	13	16	15	9	16	16
	8		40	10	17	12	22	17	23	23	14	26	17	12	14	12	18
	9		28				28	9	25	17	23	17	21	36	19	21	20
	10		14				8	5	8	17		35	15	20	15	13	21
	11		15				14	9	19	35		20	20	22	5	14	20
	12		46	14	8	18	15	14	15	22	13	19	23	14	11	27	29
	13		14	19	9	18	16	19	23	14	10	13	27	13	10	12	27
	14			24	28	18	15	18	14	17	18	9	23	12	12	23
	15				27	28	23	9	15	21	12	16	15	17	19
	16					36	25	19	18	17	15	13	6	6
	17						37	11	16	22	8	11	15
	1
4	2																		4																		4
	3						11	19	14	14	9	13	16
0.00767607	4					24	11	21	15	5	4	31	42	18
	5				6	25	19	15	23	22	14	11	20	7	15
	6			9	9	14	8	43	19	21	11	18	10	3	8	10
	7		8	17	13	18	24	29	13	26	19	11	20	17	11	13	10
	8		42	13	14	12	17	33	31	22	24	27	12	16	19	13	19
	9		16				53	14	37	23	24	18	14	19	10	13	17
	10		13				16	16	13	19		38	14	14	15	19	19
	11		12				13	12	28	40		14	25	16	13	14	23
	12		46	9	9	16	26	10	20	33	9	16	28	18	10	27	14
	13		19	18	18	21	23	29	33	20	18	12	21	14	10	17	25
	14			17	30	20	24	15	22	13	21	13	21	20	12	17
	15				26	26	29	13	19	13	11	15	18	19	14
	16					21	27	17	16	11	18	4	7	6
	17						21	11	15	16	5	20	14
	1
5	2																		5																		5
	3						17	16	16	15	8	12	24
0.00729301	4					27	8	15	13	5	10	30	45	14
	5				11	21	12	19	25	24	15	8	13	14	9
	6			13	11	19	12	31	15	16	8	19	14	2	14	16
	7		11	11	16	16	30	27	14	29	18	14	14	10	15	16	20
	8		40	17	20	16	24	35	18	25	25	25	10	12	14	8	14
	9		20	16	13	17	47	13	38	21	27	24	18	29	19	21	15
	10		16	33		27	16	10	19	21		42	15	14	13	21	13
	11		15	20	11	17	12	17	32	51		18	27	16	11	14	17
	12		36	11	14	24	25	12	21	21	17	25	34	14	7	28	13
	13		26	10	10	24	17	32	17	14	17	15	18	7	11	12	35
	14			24	23	16	25	19	16	16	19	11	13	12	13	22
	15				29	19	23	12	14	10	10	7	17	21	17
	16					21	29	16	30	14	18	10	11	8
	17						31	11	14	18	12	14	8
	1
6	2																		6																		6
	3						14	23	11	11	17	17	20
0.00744241	4					30	15	21	15	3	4	19	41	13
	5				15	21	14	16	21	24	12	5	10	16	4
	6			12	16	13	19	22	17	12	9	16	14	4	8	19
	7		12	20	16	12	29	32	14	24	19	12	9	14	10	14	20
	8		35	16	10	13	20	27	21	17	22	23	19	14	16	11	9
	9		15				38	17	42	24	30	17	14	30	16	15	17
	10		18				17	14	9	20		35	12	11	11	15	24
	11		11				14	7	16	32		18	23	15	15	12	17
	12		27	12	7	13	21	13	9	24	16	16	23	13	12	26	14
	13		23	14	15	20	18	28	20	14	11	14	24	16	10	6	27
	14			20	34	23	29	18	19	11	21	9	12	12	11	28
	15				24	23	26	13	14	14	10	16	19	12	13
	16					30	22	14	18	9	15	7	11	7
	17						33	11	13	17	10	11	9
	1
7	2																		7																		7
	3						7	15	12	16	8	18	17
	4					28	17	18	13	8	12	21	29	18
	5				13	12	11	16	18	18	7	13	15	15	10
	6			8	11	11	9	16	13	17	14	16	15	9	8	13
	7		16	15	14	19	28	24	22	30	16	11	12	13	12	13	11
	8		36	15	18	15	15	22	23	24	30	29	11	20	15	13	13
	9		30				40	14	27	26	29	18	11	33	17	25	28
	10		18				20	11	11	30		33	11	13	22	24	28
	11		17				19	14	16	48		13	20	15	16	18	17
	12		41	14	18	16	22	14	18	18	17	22	29	11	16	42	16
	13		17	12	10	23	15	26	28	16	20	12	22	13	11	9	31
	14			24	24	18	17	20	12	14	15	16	15	14	9	20
	15				25	25	30	15	11	10	16	14	22	22	7
	16					30	22	13	12	16	12	7	10	4
	17						32	8	20	14	7	7	14
	1
8	2																		8																		8
	3						15	10	17	14	13	10	28
0.00749203	4					20	11	17	13	6	3	20	39	8
	5				11	24	22	16	15	21	12	3	14	16	12
	6			9	12	12	11	25	16	18	6	12	11	13	16	19
	7		10	17	11	12	32	28	15	27	16	18	16	11	12	14	20
	8		45	10	6	10	14	23	14	19	17	25	14	9	16	9	26
	9		23	14	17	12	31	13	29	31	18	21	17	36	28	23	13
	10		16	24		18	10	11	18	21		33	10	10	15	21	28
	11		18	20	9	20	13	10	22	39		17	20	14	12	18	16
	12		34	13	14	18	18	12	13	30	11	21	31	22	16	32	23
	13		15	22	17	25	25	15	24	15	20	14	32	11	13	8	31
	14			25	35	12	21	17	22	13	6	10	16	4	7	20
	15				20	22	26	14	12	9	20	17	14	17	13
	16					22	20	15	19	9	11	10	7	7
	17						34	17	17	22	9	16	11
	1
9	2																		9																		9
	3						10	14	7	10	11	13	12
0.00727049	4					32	13	18	12	6	6	23	24	11
	5				13	25	16	27	10	27	11	11	12	11	9
	6			6	8	16	9	23	11	21	12	19	6	14	10	23
	7		10	15	17	12	13	17	19	21	12	17	8	16	6	11	16
	8		38	12	11	16	13	25	31	33	28	31	18	19	17	7	16
	9		22				30	8	46	22	23	13	16	31	21	18	14
	10		24				13	10	19	20		33	12	16	16	23	23
	11		14				19	13	37	44		21	22	21	18	17	21
	12		37	11	16	21	32	27	14	26	23	19	19	20	17	30	19
	13		32	10	16	33	23	34	32	23	20	16	21	18	10	9	30
	14			15	24	28	24	16	19	20	15	15	18	17	19	22
	15				37	18	22	12	13	12	19	15	23	18	17
	16					22	26	13	22	20	15	14	12	6
	17						28	7	19	13	6	14	8
	1
10	2																		10																		10
	3						7	14	10	10	6	7	27
7.63895	4					25	8	9	8	1	6	20	31	8
	5				11	24	20	17	10	12	15	7	10	14	5
	6			11	11	8	16	17	10	10	15	12	8	5	12	23
	7		12	22	17	10	27	27	14	22	18	18	8	13	11	12	12
	8		36	9	22	20	21	27	31	20	18	32	13	14	9	16	11
	9		22				34	14	28	20	25	14	15	29	12	18	12
	10		26				9	6	16	30		34	13	23	22	20	21
	11		14				12	13	28	40		17	24	15	16	22	16
	12		41	15	13	11	23	21	15	22	22	25	22	13	11	22	25
	13		19	17	12	21	20	22	32	19	19	16	26	14	10	7	19
	14			20	22	19	27	16	13	10	27	16	15	9	10	13
	15				20	26	25	14	13	11	24	8	15	19	17
	16					35	19	17	16	13	13	4	14	4
	17						33	10	4	23	8	13	11

## Sheet: FI
FractionationIndices
Signals of insufficient quality were excluded from the property maps. Signals could be rejected based on noise low amplitude, large artefacts or ventricluar farfields that could not be substracted. Fractionation index is particularly sensitive to noise. Therefore electrodes with substantial noise are more strictly excluded.
		1	2	3	4	5	6	7	8	9	10	11	12	13	14	15	16	17
1	1					2.00836	1.89333	1.28356	1.03667	1.62925	1.09587	2.08746	1.66447	1.57749					1																		1
	2				1.30619	1.65747	1.75082	1.16944	1.34158	0.934211	1.42149	1.3918	1.30832	1.176	1.55628
0.00779495	3			1.38211	1.59643	1.64658	2.10806	2.00487	1.97368	0.98374	0.857143	0.893031	0.991948	1.30533	1.42994	1.26837
	4		1.24434	1.60096	1.67633	1.78374	2.1473	1.94498	2.3517	0.789984	0.813505	0.919872	1.18211	1.07556	1.26699	1.57143	1.0711
	5	1.40065	1.47403	1.87884	2.21383	2.60194	2.89951	1.99513	2.21789	1.87034	1.4375	1.80769	0.913043	1.58401	1.37641	1.46515	1.55677	1.06785
	6	1.28341	1.90113	2.32033	2.81506	2.82468	2.88207	2.58252	1.791	2.44895	1.73829	1.03758	0.709677	0.845411	1.41838	1.0624	1.75318	1.40356
	7	1.27822	1.19969	2.46688	2.88581	2.73344	3.25199	2.66403	2.65862	1.92195	1.82658	1.42139	1.08752	1.36084	1.408	1.0721	1.63694	1.5861
	8	2.05997	1.36834	1.35065	0.9	1.81847	3.2544	1.85849	2.41498	2.54658	2.66667	2.00816	1.86526	1.57649	2.01595	1.48377	1.4717	1.8238
	9	1.11489	1.6448	0.940129		1.79777	2.19843	2.46166	2.35976	2.02099		1.82686	1.81965	1.7136	2.02205	1.4869	1.84735	1.58122
	10	1.36661	1.0374	1.3561	1.14911	1.70388	2.20978	1.98302	1.75227	1.56677		3.24204	1.82492	1.60658	1.9922	2.01077	1.50613	0.920863
	11	1.40514	1.05636	1.16423	0.846029	2.98706	2.4189	1.95188	2.01796	2.61414	3.41593	2.19155	1.92943	2.0256	1.93415	2.05287	1.64829	0.941176
	12	0.979266	0.965354	0.966772	1.7812	2.66881	2.46986	1.85239	2.12046	2.10997	1.85239	1.96132	1.65418	1.89189	1.31617	0.918455	0.994194	1.04641
	13	2.29068	1.63099	1.38073	2.32805	2.65528	2.22944	1.80595	1.73907	2.08143	1.49167	1.25068	0.9658	0.703146	1.18513	1.00429	1.0492	0.57953
	14		1.78549	2.25472	2.47619	2.11544	1.6406	1.48027	1.56259	1.34345	0.910308	1.09651	0.855422	0.681941	1.00136	1.31171	0.845188
	15			1.95259	2.21997	1.45902	0.962567	1.1479	0.969003	1.22942	0.841755	0.787798	0.946738	0.578523	0.610738	0.837466
	16				1.61351	1.21088	0.768212	0.929333	1.1376	0.737265	0.730563	0.665782	0.539177	0.486702	1.55798
	17					0.554017	0.72349	0.542667	0.929348	1.66213	1.52538	1.45034	0.994638	1.28378
2	1					2.07488	2.04478	1.36348	1.16086	1.62982	1.20066	2.03471	1.56066	1.45867					2																		2
	2				1.41167	1.73864	1.71661	1.21967	1.34704	0.9018	1.47368	1.38374	1.35621	1.21935	1.51067
0.0074415	3			1.41909	1.64401	1.63312	2.04241	2.0346	2.02142	0.933007	0.817886	0.876823	1.04235	1.2776	1.51786	1.44249
	4		1.25723	1.6565	1.65154	1.83199	2.07805	2.20847	2.39216	0.880065	0.890675	0.913183	1.17961	1.03231	1.19055	1.63799	1.0938
	5	1.52998	1.60032	2.09179	2.34578	2.55519	2.86184	2.09852	2.04397	1.93944	1.47011	1.68058	0.922099	1.53896	1.28019	1.47078	1.66667	1.14693
	6	1.4791	1.95624	2.50654	2.88216	2.89706	2.94652	2.5105	1.81422	2.11878	1.70502	1.03674	0.695513	0.832268	1.3056	0.969551	1.79872	1.4122
	7	1.32805	1.17994	2.38835	2.78896	2.77581	3.23089	2.5622	2.6735	1.93548	1.74595	1.44246	1.08052	1.41558	1.29825	0.945073	1.68581	1.60278
	8	2.16613	1.44122	1.42997	1.01461	1.76025	3.26636	1.84816	2.49701	2.48933	2.53909	1.95772	1.85645	1.38934	1.84677	1.3049	1.51597	1.7542
	9	1.05537	1.7856	0.983819		1.83974	2.39498	2.49077	2.67862	2.13778		1.82343	1.77492	1.72195	1.86378	1.33439	1.83201	1.51051
	10	1.24149	1.0356	1.17752	1.2589	1.72698	2.23734	2.10324	1.80328	1.58235		3.27981	1.65512	1.46299	1.83546	1.93711	1.34268	0.844604
	11	1.43619	1.11093	1.1881	0.811382	2.82154	2.38986	2.03153	1.9521	2.52437	3.13824	2.29474	1.81707	1.92391	1.81231	1.91884	1.66817	0.928169
	12	1.04348	0.8848	1.03962	1.85024	2.54735	2.49924	2	2.18486	2.05117	1.74319	1.91583	1.50509	1.74603	1.28634	0.864629	0.957602	1.0452
	13	2.31905	1.648	1.33974	2.3072	2.59969	2.1482	1.67089	1.61119	1.89201	1.363	1.23433	0.965706	0.673051	1.27834	1.06841	0.935953	0.538354
	14		1.86278	2.4378	2.47409	2.19648	1.46602	1.30982	1.47826	1.30959	0.847091	1.01495	0.79567	0.758527	0.99863	1.33286	0.839662
	15			2.10152	2.20264	1.46685	0.987705	1.12432	0.993225	1	0.79918	0.844384	0.841611	0.667575	0.658038	0.756831
	16				1.45255	1.29046	0.816438	0.808743	1.11266	0.707547	0.659489	0.624161	0.51552	0.462788	1.57729
	17					0.53986	0.791553	0.584594	0.965422	1.63866	1.52078	1.43292	1.03151	1.41967
3	1					2.00831	1.90787	1.39238	1.20854	1.52295	1.1157	1.94711	1.59083	1.35016					3																		3
	2				1.4623	1.8126	1.78053	1.1473	1.4183	0.880524	1.45861	1.27258	1.30569	1.17286	1.45673
0.00732629	3			1.3984	1.64495	1.63934	2.14333	1.85809	1.87231	1.01789	0.883224	0.861789	1.02903	1.37175	1.49595	1.32263
	4		1.19904	1.68599	1.58075	1.84304	2.00656	1.89752	2.3257	0.866013	0.899023	1.05854	1.17857	1.09952	1.35599	1.5408	1.04676
	5	1.50401	1.45631	1.93065	2.25604	2.64715	2.71031	2.0936	2.0377	1.91104	1.5486	1.77476	0.832797	1.70395	1.35304	1.39355	1.51975	1.05997
	6	1.3344	1.98873	2.54173	2.95491	2.96117	2.88226	2.59806	1.84578	2.28803	1.63029	0.921951	0.561489	0.809061	1.4256	0.968203	1.70813	1.33036
	7	1.40571	1.18153	2.44481	2.79077	2.70292	3.08387	2.61182	2.5639	1.9344	1.60227	1.30995	0.978827	1.13421	1.47368	1.05222	1.68949	1.45263
	8	2.11111	1.44498	1.4496	0.777419	1.60737	3.11802	1.78989	2.28439	2.26398	2.28084	1.83845	1.81906	1.40258	1.87097	1.31768	1.50395	1.62727
	9	1.25321	1.80065	1.05682		1.63607	2.312	2.33649	2.35835	2.11908		1.81138	1.66721	1.63622	1.97258	1.35901	1.81115	1.44362
	10	1.37799	1.17042	1.46006	1.15323	1.72727	2.29498	2.08962	1.75417	1.65916		3.50564	1.77653	1.5142	1.92417	1.95659	1.41784	0.80438
	11	1.47385	0.982428	1.1629	0.817891	2.86306	2.27273	1.97264	1.91892	2.45359	3.27232	2.15549	1.94844	1.9549	1.89247	1.91818	1.62443	0.941595
	12	1.17433	1.01896	1.04747	1.78956	2.51192	2.56044	1.89971	2.12445	2.0429	1.82703	1.97388	1.58297	1.77647	1.31732	0.870451	1.03812	1.12912
	13	2.28752	1.66561	1.56847	2.23138	2.66615	2.25439	1.80057	1.5865	1.98578	1.3931	1.2011	1.04703	0.676389	1.32656	1.01898	0.955687	0.526836
	14		1.81447	2.24766	2.45413	2.17031	1.67701	1.42254	1.55085	1.40028	0.94837	0.910308	0.815115	0.729986	1.01513	1.38116	0.777618
	15			1.95665	2.07381	1.58921	1.0467	1.23162	1.04172	1.1571	0.749662	0.852151	0.812584	0.652646	0.555256	0.808333
	16				1.40057	1.26111	0.829904	0.883721	1.08	0.743836	0.74145	0.618474	0.52075	0.459279	1.65295
	17					0.612766	0.791148	0.631651	1.00278	1.67932	1.61798	1.44909	0.931507	1.41598
4	1					2.09831	1.8934	1.32554	1.19135	1.68677	1.25589	2.12957	1.69052	1.34291					4																		4
	2				1.31323	1.67399	1.73129	1.09866	1.40236	0.955372	1.4808	1.40924	1.35207	1.17349	1.56343
0.00767607	3			1.21689	1.54742	1.51007	2.09275	1.97475	1.89002	1.04674	0.827018	0.838235	1.02927	1.14545	1.47368	1.24919
	4		1.16203	1.45351	1.50903	1.77025	2.04613	2.06777	2.24046	0.744224	0.81592	1.07895	1.2455	1.09453	1.28878	1.6495	1.01522
	5	1.45559	1.52727	1.96205	2.21947	2.61398	2.89621	1.96557	2.15523	1.77924	1.59235	1.62723	0.789127	1.56219	1.36678	1.40717	1.62898	1.17252
	6	1.26144	1.94563	2.33609	2.74876	2.83607	3.03448	2.7031	1.94234	2.37622	1.71217	1.00661	0.596721	0.806504	1.35131	0.996774	1.71108	1.42447
	7	1.13893	1.06947	2.37105	2.8273	2.80229	3.23786	2.5904	2.7516	1.93475	1.69431	1.34323	1.04801	1.13008	1.36467	1.00484	1.624	1.53528
	8	1.97862	1.37664	1.25455	0.755	1.63115	3.15714	1.85086	2.47554	2.53333	2.533	1.86733	1.76936	1.42182	1.81967	1.32	1.53035	1.71908
	9	1.12521	1.69687	0.977049		1.68567	2.208	2.50704	2.6079	2.11712		1.81639	1.64696	1.64437	2.00976	1.34913	1.83467	1.49619
	10	1.28407	0.890523	1.21061	1.17957	1.66612	2.19775	2.07837	1.86086	1.78045		3.59804	1.78641	1.58266	1.86151	2.0416	1.40287	0.803807
	11	1.48361	1.08738	1.04078	0.647446	2.677	2.33603	2.01515	2.05581	2.64723	3.23008	2.35168	1.88715	2.02222	1.91339	1.95504	1.59509	0.907514
	12	1.04	0.921348	1.08885	1.96254	2.52529	2.53931	2.03556	2.17847	2.05224	1.93098	2.04252	1.55878	1.81994	1.4747	0.948454	1.04136	1.12974
	13	2.15457	1.4848	1.36422	2.41224	2.74132	2.25444	1.81466	1.60227	2.05051	1.35624	1.21289	1.05726	0.732118	1.34694	1.06305	0.960118	0.616595
	14		1.68553	2.26025	2.49922	2.1553	1.59072	1.43079	1.59	1.36441	0.975104	1.02479	0.769231	0.662125	0.900277	1.29335	0.799145
	15			2.06829	2.07864	1.44789	1.01253	1.13025	0.959554	1.19529	0.816327	0.796448	0.880223	0.589359	0.61612	0.812587
	16				1.44284	1.37765	0.768913	0.870474	1.07143	0.756606	0.766252	0.660326	0.590476	0.496617	1.70654
	17					0.662393	0.790071	0.520604	0.87798	1.77525	1.45157	1.40556	1.07003	1.47025
5	1					2.05307	1.91429	1.27303	1.0745	1.60862	1.14029	1.97674	1.61866	1.54207					5																		5
	2				1.47394	1.72368	1.76316	1.10265	1.31683	0.919142	1.46053	1.33117	1.44754	1.13355	1.5561
0.00729301	3			1.44268	1.66721	1.72654	2.2767	2.03443	1.94893	0.903437	0.847291	0.799028	0.903382	1.28595	1.4684	1.33821
	4		1.18371	1.60193	1.74757	1.90615	2.1744	2.06341	2.27496	0.710311	0.743883	0.959677	1.12378	1.10323	1.25285	1.71031	1.04019
	5	1.54313	1.6208	1.99679	2.42165	2.67476	2.88274	2.0161	1.97753	1.81169	1.45425	1.69952	0.787234	1.60328	1.34887	1.42114	1.56735	1.21875
	6	1.32907	2.0096	2.36058	2.98865	2.92695	2.791	2.46463	1.72142	2.2304	1.65539	1.06036	0.567213	0.798361	1.36935	0.963434	1.74121	1.34277
	7	1.34531	1.32808	2.44409	2.86378	2.6879	3.1388	2.64697	2.64984	1.96434	1.67909	1.35065	1.00649	1.11489	1.3906	1.10737	1.67143	1.57056
	8	2.11709	1.53797	1.57643	0.871835	1.75791	3.12888	1.86196	2.3525	2.46575	2.44156	1.86949	1.7767	1.38862	1.76183	1.2736	1.44601	1.70732
	9	1.11392	1.75637	1.02694		1.89764	2.25469	2.45329	2.50675	2.09064		1.76672	1.68336	1.72934	2.00968	1.37599	1.93492	1.42943
	10	1.2524	1.07853	1.30757	1.1246	1.65924	2.0858	2.09909	1.82556	1.66766		3.6886	1.84261	1.46772	1.88114	1.89258	1.43594	0.878832
	11	1.57576	1.13557	1.248	0.8272	2.92971	2.35063	1.96828	1.96662	2.51929	2.75556	2.27463	1.92142	1.93415	1.80031	1.93944	1.5157	0.961593
	12	1.09729	1.11987	1.10204	2.01743	2.66348	2.47859	1.97654	2.14623	2.08247	1.78788	2.0043	1.68162	1.86107	1.38913	0.884164	0.916422	1.1453
	13	2.15748	1.75358	1.69793	2.33595	2.66616	2.22414	1.83711	1.7384	1.96728	1.3417	1.22572	0.991781	0.76105	1.37608	1.06029	0.948905	0.634965
	14		1.83051	2.34312	2.43096	2.06831	1.50138	1.27724	1.56942	1.37222	0.894166	0.97415	0.825203	0.721088	0.95788	1.36312	0.903955
	15			2.07046	2.06131	1.41201	0.962912	1.05479	0.952316	1.17255	0.791781	0.832659	0.857916	0.637602	0.608108	0.829468
	16				1.37355	1.27159	0.764946	0.817439	1.09078	0.775538	0.764946	0.602703	0.528782	0.499323	1.69368
	17					0.542135	0.762431	0.621585	1.00962	1.8042	1.4466	1.42778	1.02466	1.33333
6	1					2.09121	1.87646	1.34494	1.14784	1.53808	1.15635	2.03783	1.64821	1.37194					6																		6
	2				1.46829	1.625	1.72623	1.20758	1.46535	0.835796	1.41447	1.37274	1.29451	1.18689	1.55207
0.00744241	3			1.46474	1.66613	1.63902	2.17657	1.99337	1.9376	0.863415	0.796748	0.893791	0.942029	1.25493	1.37825	1.3047
	4		1.26741	1.68521	1.65484	1.79227	2.05627	2.06149	2.18197	0.803279	0.84168	1.0629	1.19413	1.10586	1.19805	1.54262	1.05572
	5	1.50159	1.47293	1.98086	2.33008	2.64344	2.94346	2.10484	2.09076	1.67585	1.60261	1.58054	0.87055	1.48214	1.26979	1.36201	1.76442	1.19585
	6	1.38679	2.07132	2.47536	2.76849	2.8752	2.92742	2.46667	1.83333	2.27317	1.71941	1.08388	0.5781	0.806763	1.32745	1.00795	1.74437	1.35232
	7	1.30709	1.28349	2.48885	2.84628	2.61611	3.11111	2.56426	2.5142	1.84951	1.69741	1.37702	1.0789	1.13397	1.32853	1.02222	1.68058	1.52481
	8	2.14127	1.4126	1.31994	0.802269	1.7701	3.25786	1.91473	2.45649	2.38249	2.54781	1.87154	1.88216	1.28871	1.71474	1.22433	1.48889	1.7916
	9	1.30609	1.88179	1.1266		1.8544	2.25	2.35474	2.45345	2.20783		1.68821	1.68548	1.61489	1.98374	1.30189	1.84921	1.52522
	10	1.3434	1.15287	1.33226	1.2624	1.89189	2.06349	2.03709	1.75264	1.58702		3.64423	1.70607	1.48882	1.75277	1.82362	1.31115	0.853659
	11	1.45611	1.16719	1.11765	0.7728	2.90823	2.40787	1.9276	1.96997	2.5421	2.81751	2.26324	1.8587	1.95788	1.8357	1.99237	1.65909	0.985915
	12	1.17425	1.2125	1.15863	2.00632	2.69668	2.57254	2.02053	2.11391	2.0384	1.87225	2.13793	1.61295	1.85631	1.44787	0.964912	0.938596	1.08062
	13	2.13407	1.61006	1.55538	2.45794	2.68807	2.26812	1.84384	1.64366	1.93777	1.51955	1.29484	1.07473	0.728142	1.37536	1.13974	1.03924	0.561549
	14		1.98594	2.43302	2.54642	2.22014	1.60055	1.37898	1.57462	1.39221	0.947368	0.99866	0.825737	0.699198	1.1102	1.40141	0.772472
	15			2.03358	2.0404	1.47397	0.98374	1.125	1.01507	1.19324	0.76769	0.8251	0.875502	0.588549	0.628	0.859673
	16				1.37624	1.22585	0.810738	0.854447	1.10729	0.786685	0.703356	0.556291	0.48226	0.496011	1.66848
	17					0.609179	0.846049	0.513514	1.02613	1.73925	1.51511	1.39398	0.979893	1.44583
7	1					2.10784	1.91833	1.35	1.21182	1.63711	1.14146	2.07049	1.74141	1.41195					7																		7
	2				1.4772	1.79119	1.70579	1.17304	1.44333	0.900813	1.3617	1.27154	1.35772	1.19125	1.60621
	3			1.46688	1.59543	1.61039	2.16203	1.91914	1.92671	0.886548	0.864734	0.892683	0.99513	1.232	1.5776	1.30096
	4		1.1584	1.5424	1.65751	1.79772	2.16881	1.96242	2.20661	0.865794	0.812199	0.933977	1.21129	1.16452	1.21095	1.62682	1.10152
	5	1.52174	1.59003	1.97097	2.24351	2.64136	2.84528	2.01305	2.24633	1.7671	1.50968	1.69365	0.901116	1.6272	1.31731	1.35304	1.55313	1.19672
	6	1.45455	2.0592	2.49282	2.911	2.92616	2.7717	2.44911	1.80456	2.33441	1.7508	1.00161	0.668821	0.932907	1.34646	0.973479	1.70394	1.40444
	7	1.37872	1.28931	2.41083	2.86538	2.83732	3.192	2.62381	2.55911	1.90468	1.82382	1.46029	1.09984	1.13849	1.47227	1.15445	1.68429	1.59084
	8	2.14715	1.45483	1.248	0.770227	1.64744	3.26498	1.88594	2.48154	2.37904	2.50729	1.93517	1.78744	1.4	1.93427	1.39908	1.52859	1.79646
	9	1.19139	1.76312	1.01752		1.69071	2.08438	2.49077	2.56476	2.08593		1.76045	1.85096	1.71132	2.06891	1.40367	1.93313	1.56996
	10	1.40997	1.19617	1.44605	1.13608	1.71429	2.23923	2.14656	1.8281	1.75111		3.76582	1.82753	1.60572	1.88558	2.04489	1.45137	0.935028
	11	1.40952	1.17732	1.16349	0.855556	3.0544	2.41693	2.02507	1.89971	2.68182	2.95335	2.34519	2.04147	2.1089	1.99846	2.05847	1.70803	0.98069
	12	0.97619	0.949843	0.97327	1.86963	2.49603	2.60784	2.01727	2.21252	2.18341	2.05195	2.25847	1.76377	1.95954	1.43208	0.97554	0.932374	1.14424
	13	2.21061	1.53344	1.59812	2.43574	2.64516	2.38006	1.95493	1.71944	2.08914	1.42605	1.27346	1.08367	0.822647	1.38604	1.14943	1.01871	0.677027
	14		1.95944	2.36719	2.54058	2.16547	1.60548	1.36986	1.61227	1.47945	0.994681	1.0133	0.907285	0.71771	0.977151	1.42356	0.917127
	15			2.06737	2.06438	1.32075	1.04307	1.17639	1.03619	1.14592	0.862252	0.813984	0.874505	0.646825	0.669749	0.879357
	16				1.46714	1.32201	0.772049	0.890392	1.17123	0.760695	0.685333	0.652116	0.53836	0.49004	1.54826
	17					0.590096	0.811475	0.553163	0.916324	1.74826	1.513	1.3916	0.93484	1.40325
8	1					2.0134	1.72819	1.22766	1.11551	1.39008	1.0745	1.97826	1.72742	1.3252					8																		8
	2				1.41653	1.66232	1.64658	1.05638	1.44205	0.900662	1.34833	1.29118	1.32897	1.17101	1.4239
0.00749203	3			1.3152	1.64803	1.69079	2.15107	1.97044	1.93677	0.960396	0.855263	0.781199	0.9248	1.23539	1.40514	1.2871
	4		1.26475	1.70096	1.63124	1.72846	2.12644	1.94901	2.14925	0.762295	0.831699	0.968903	1.15196	1.17695	1.39194	1.64065	1.12519
	5	1.40895	1.6064	1.9533	2.31209	2.64426	2.93974	1.90445	2.08703	1.90164	1.54139	1.72258	0.903069	1.54739	1.35968	1.39194	1.67581	1.16893
	6	1.35612	2.00962	2.49676	2.9252	2.95066	2.84702	2.37115	1.67327	2.16556	1.63306	1.00653	0.637705	0.783871	1.40859	1.01108	1.83949	1.40991
	7	1.2723	1.20879	2.41707	2.86452	2.73163	3.08044	2.50949	2.58824	1.85222	1.66667	1.27805	1.0416	1.18841	1.39461	1.01899	1.64364	1.52259
	8	2.064	1.49275	1.25608	0.874003	1.50159	3.06022	1.80781	2.37227	2.50235	2.34641	1.90645	1.81399	1.32492	1.82353	1.34851	1.57098	1.68216
	9	1.11093	1.65113	0.946688		1.58814	2.26164	2.47664	2.56884	2.16942		1.75974	1.68006	1.56774	1.93839	1.46584	1.92512	1.5403
	10	1.22186	1.19156	1.33814	1.16694	1.68116	2.1312	2.17081	1.80514	1.65082		3.62019	1.90764	1.41812	1.88031	2.02636	1.39375	0.880466
	11	1.39587	1.07619	1.1573	0.764895	2.88511	2.34455	2.06116	1.98331	2.45252	3.11243	2.12444	1.82273	1.98287	1.86615	2.03614	1.63855	1.00426
	12	0.962025	1.0311	0.929022	1.9552	2.65097	2.59414	1.91029	2.16912	2.07533	1.8207	2.08166	1.57431	1.65423	1.31278	0.868996	0.972182	1.13617
	13	2.08974	1.57619	1.60703	2.34009	2.74189	2.25329	1.78582	1.77825	1.89311	1.42047	1.3119	0.998617	0.732687	1.30472	1.03623	0.788099	0.57953
	14		1.91311	2.33801	2.55505	2.19336	1.59944	1.46369	1.609	1.45125	0.928378	0.96371	0.807018	0.716599	0.995907	1.38034	0.834979
	15			2.11111	2.10534	1.43724	0.963215	1.19616	1.02452	1.21811	0.803523	0.810738	0.85676	0.619112	0.689189	0.834925
	16				1.48291	1.23256	0.733062	0.861833	1.1768	0.780055	0.721245	0.681081	0.553476	0.505992	1.66074
	17					0.505587	0.816044	0.54918	0.965612	1.72419	1.57382	1.40659	0.952316	1.39394
9	1					2.02712	1.83022	1.34175	1.19829	1.44088	1.16695	2.02698	1.65781	1.37271					9																		9
	2				1.39901	1.64942	1.76807	1.086	1.38567	0.844221	1.33333	1.39226	1.43456	1.23179	1.40397
0.00727049	3			1.42414	1.60661	1.59113	2.17053	2.00337	1.86792	0.907131	0.899833	0.782392	1.04132	1.18469	1.40299	1.26221
	4		1.20227	1.61364	1.7557	1.89869	2.24228	2.20957	2.18364	0.965517	0.931894	0.948333	1.1381	1.04283	1.12231	1.57661	1.06886
	5	1.55719	1.55935	2.07641	2.5058	2.6759	2.96895	2.06483	2.11166	1.88342	1.57667	1.64262	0.871452	1.62314	1.15677	1.28478	1.50809	1.22995
	6	1.26547	1.97541	2.44354	2.86842	2.81463	2.96921	2.47164	1.82955	2.23888	1.69486	1.09151	0.68595	0.845395	1.36629	0.945073	1.70894	1.41553
	7	1.22524	1.14815	2.37068	2.76885	2.71615	3.13238	2.60476	2.66504	1.94262	1.7743	1.35679	1.15625	1.22787	1.40226	1.06159	1.60709	1.51608
	8	2.03448	1.30278	1.22222	0.7743	1.63607	3.17732	1.825	2.32866	2.4254	2.47176	1.9028	1.84288	1.47002	1.92557	1.45166	1.42722	1.67021
	9	1.17298	1.67484	0.960591		1.65025	2.2299	2.42247	2.37733	2.0761		1.74754	1.67154	1.57096	2.03074	1.43925	1.87046	1.47826
	10	1.29112	1.08604	1.27597	1.10984	1.70292	2.28201	2.07042	1.80368	1.61504		3.82102	1.78734	1.5056	2.05016	2.02983	1.33281	0.892012
	11	1.40545	1.16963	1.25243	0.807443	3.13452	2.46474	2.00922	1.94962	2.571	3.15083	2.31364	1.8873	1.92563	1.81534	1.96662	1.61433	0.994228
	12	1.0768	1.09192	1.16852	1.99511	2.6629	2.65528	2.04641	2.22272	2.04491	1.84925	2.10831	1.58012	1.8704	1.43498	0.907489	0.963181	1.08841
	13	2.04272	1.4791	1.62758	2.4736	2.75119	2.25404	1.86705	1.65612	2.07101	1.43972	1.27949	0.987324	0.723796	1.28382	1.03959	0.935007	0.564539
	14		2.02665	2.46203	2.49371	2.10132	1.60795	1.31453	1.46942	1.34459	0.884615	1.01806	0.820084	0.653686	0.895688	1.39826	0.854046
	15			2.08655	2.14243	1.37606	0.930556	1.16971	0.995798	1.17427	0.669433	0.727524	0.814917	0.630556	0.580468	0.717514
	16				1.40294	1.15581	0.73444	0.786217	1.08579	0.740586	0.721836	0.543448	0.495902	0.416209	1.58601
	17					0.455064	0.754986	0.517385	0.781997	1.6875	1.53592	1.48148	0.947149	1.37465
10	1					2.04377	1.85329	1.40304	1.19562	1.61121	1.07744	1.8861	1.71808	1.53311					10																		10
	2				1.5025	1.72591	1.63211	1.15333	1.43581	0.862416	1.33613	1.1686	1.25418	1.18647	1.60906
0.598925	3			1.44805	1.60984	1.68699	2.05059	1.87797	1.82462	0.974916	0.858586	0.865	0.953642	1.30132	1.49175	1.36275
	4		1.20228	1.65049	1.52692	1.73399	2.10483	2.0599	2.13087	0.935323	0.920398	1.01812	1.17143	0.980263	1.2969	1.57686	1.0625
	5	1.47471	1.55447	2.05255	2.39967	2.5264	2.82248	2.00656	1.97176	1.82609	1.63833	1.78773	0.842454	1.51167	1.31818	1.31743	1.59223	1.17547
	6	1.14403	1.87908	2.5297	3.07201	2.99672	2.87967	2.39546	1.79112	2.46318	1.81209	1.0796	0.599018	0.821667	1.39315	0.9744	1.68506	1.44635
	7	1.29032	1.1557	2.32897	3.07492	2.80587	3.01905	2.44817	2.67472	2.00972	1.78352	1.41408	1.15512	1.30083	1.38474	1.06634	1.59319	1.57121
	8	2.0866	1.43485	1.3719	0.885246	1.7443	3.2128	1.7783	2.44565	2.38545	2.52961	2.01824	1.92525	1.39274	1.8347	1.36901	1.39165	1.76589
	9	1.15987	1.71405	1.01797		1.64975	2.28824	2.4953	2.50152	2.125		1.80587	1.77325	1.79316	2.02431	1.30189	1.8766	1.67727
	10	1.09299	1.08117	1.41176	1.2137	1.81745	2.2748	2.07477	1.86086	1.70765		3.4366	1.6704	1.42357	1.88925	1.93968	1.30016	0.964497
	11	1.35818	1.03566	1.042	0.739903	2.93464	2.41801	1.97108	2.00601	2.5991	2.71982	2.22901	1.86207	1.89752	1.90454	1.90615	1.65653	1.06149
	12	0.943457	1.06571	0.980707	1.8263	2.56189	2.59627	1.98514	2.16891	2.12836	1.83456	2.04867	1.59881	1.72687	1.41053	0.852679	0.982169	1.09867
	13	2.15806	1.79615	1.6272	2.33974	2.69859	2.18999	1.86455	1.6453	1.97986	1.47135	1.28992	0.939691	0.700843	1.29446	0.994109	0.946269	0.576271
	14		2.01735	2.28594	2.44651	2.26331	1.66431	1.42574	1.47937	1.39915	0.937063	1.0674	0.775791	0.655647	0.980392	1.33285	0.902439
	15			2.07481	2.1213	1.39832	0.986169	1.23776	1.00697	1.17318	0.724138	0.780654	0.828804	0.645205	0.599179	0.830532
	16				1.33091	1.24613	0.776848	0.871688	1.15664	0.688366	0.663448	0.560811	0.481781	0.464865	1.58577
	17					0.582979	0.751743	0.554633	1.05924	1.85328	1.52587	1.39722	0.953103	1.3939

## Sheet: CV
MeanVelocity
Signals of insufficient quality were excluded from the property maps. Signals could be rejected based on noise low amplitude, large artefact or ventricluar farfields that could not be substracted.
		1	2	3	4	5	6	7	8	9	10	11	12	13	14	15	16	17
1	1					0.565725	0.622642	0.60186	0.649536	0.641652	0.647221	0.650282	0.587816	0.601631					1																		1
	2				0.630529	0.638301	0.622354	0.686602	0.684514	0.681557	0.695115	0.688361	0.701198	0.691934	0.592967
0.00779495	3			0.741398	0.699211	0.679994	0.675861	0.646151	0.700654	0.667234	0.678183	0.702931	0.730424	0.711195	0.653363	0.634146
	4		0.782511	0.801917	0.735892	0.699711	0.716112	0.686137	0.677548	0.627079	0.610246	0.668728	0.722098	0.730525	0.726954	0.725779	0.558536
	5	0.837076	0.865177	0.863719	0.755994	0.770486	0.767382	0.707391	0.73941	0.68253	0.673442	0.638404	0.703521	0.698135	0.672372	0.702281	0.635251	0.558418
	6	0.941153	0.893922	0.799384	0.774328	0.7775	0.881877	0.717822	0.739153	0.679527	0.715232	0.731635	0.66108	0.643556	0.656833	0.658495	0.671359	0.563423
	7	0.833976	0.817055	0.86544	0.810017	0.739592	0.797501	0.75053	0.792358	0.696228	0.705607	0.725977	0.690765	0.653106	0.641975	0.651595	0.648823	0.593269
	8	0.814109	0.825517	0.805591	0.674872	0.729861	0.751753	0.74963	0.73273	0.743537	0.775606	0.744214	0.757087	0.706478	0.62799	0.654625	0.659331	0.59685
	9	0.7404	0.727199	0.743275		0.700777	0.752378	0.772509	0.712343	0.714729	0.723683	0.687457	0.67033	0.642272	0.63747	0.639972	0.639783	0.586849
	10	0.728465	0.777545	0.754897	0.706804	0.687715	0.692032	0.709206	0.725261	0.774234	0.816143	0.688258	0.719898	0.64269	0.631846	0.625319	0.616474	0.53902
	11	0.717423	0.748657	0.745462	0.701698	0.706404	0.744592	0.73495	0.766824	0.784455	0.7933	0.784661	0.749304	0.684974	0.668516	0.636267	0.694721	0.573625
	12	0.685226	0.806081	0.755727	0.762248	0.75721	0.726216	0.687156	0.720788	0.812977	0.812481	0.812237	0.763897	0.701157	0.655613	0.657579	0.671602	0.600261
	13	0.57189	0.705047	0.794456	0.729566	0.742311	0.719595	0.734188	0.717431	0.765709	0.792297	0.835296	0.796474	0.752373	0.683692	0.685489	0.672217	0.602349
	14		0.599004	0.701659	0.759762	0.772797	0.748378	0.716862	0.751582	0.751834	0.787841	0.844374	0.822582	0.766815	0.735637	0.654765	0.614776
	15			0.71421	0.763325	0.802396	0.800816	0.802758	0.811034	0.842877	0.828445	0.835316	0.817766	0.780887	0.75461	0.658981
	16				0.699376	0.756929	0.783688	0.772953	0.768438	0.803344	0.815556	0.764948	0.773593	0.759539	0.719755
	17					0.786977	0.728213	0.683585	0.736177	0.763106	0.778579	0.762098	0.775764	0.764664
2	1					0.601812	0.584243	0.61364	0.658267	0.67891	0.695261	0.6136	0.627086	0.577376					2																		2
	2				0.569561	0.610221	0.607621	0.654928	0.666398	0.683227	0.646854	0.67088	0.698424	0.654771	0.616989
0.0074415	3			0.716112	0.660997	0.684363	0.673079	0.64572	0.652059	0.639279	0.666424	0.683625	0.687173	0.707865	0.674894	0.61592
	4		0.764301	0.776536	0.733681	0.720582	0.730158	0.71971	0.656979	0.610837	0.622668	0.717116	0.728339	0.709543	0.694219	0.668783	0.559076
	5	0.786131	0.744775	0.775041	0.77385	0.770811	0.804412	0.741509	0.678083	0.671146	0.662612	0.673465	0.73874	0.695726	0.660547	0.676235	0.715727	0.585739
	6	0.813509	0.807621	0.836077	0.792991	0.802574	0.817477	0.763737	0.746813	0.732877	0.731699	0.744162	0.734719	0.670353	0.697835	0.690844	0.659484	0.581995
	7	0.941326	0.90426	0.852227	0.798939	0.772187	0.84449	0.851568	0.792927	0.773118	0.77731	0.815716	0.801155	0.708508	0.664336	0.703067	0.703973	0.594368
	8	0.847253	0.853508	0.799436	0.716927	0.703584	0.838655	0.788761	0.795693	0.779503	0.820709	0.788815	0.761143	0.753396	0.737605	0.741029	0.730371	0.61313
	9	0.745942	0.777375	0.744056		0.663229	0.776883	0.761701	0.83743	0.767372	0.738808	0.735823	0.738748	0.682754	0.678488	0.684813	0.672716	0.632191
	10	0.708018	0.760554	0.76163	0.687236	0.656331	0.699991	0.735793	0.813988	0.742616	0.76969	0.753459	0.713842	0.66634	0.634747	0.687292	0.677985	0.555579
	11	0.730051	0.758325	0.787436	0.737753	0.704462	0.69638	0.705237	0.760596	0.780781	0.813588	0.774196	0.758744	0.698072	0.663189	0.721124	0.699552	0.603144
	12	0.632931	0.677239	0.747523	0.688811	0.703319	0.740091	0.74417	0.779275	0.78604	0.768808	0.79089	0.745795	0.709121	0.650946	0.683639	0.689273	0.634135
	13	0.581435	0.64155	0.748767	0.717014	0.704394	0.717083	0.700541	0.713262	0.773219	0.835722	0.801268	0.769622	0.754835	0.687733	0.68413	0.664987	0.569035
	14		0.57072	0.649425	0.729161	0.773959	0.746103	0.719267	0.755488	0.7338	0.756371	0.847339	0.787118	0.779152	0.705876	0.666488	0.614924
	15			0.638154	0.732008	0.791609	0.811837	0.798655	0.815212	0.835874	0.804851	0.836155	0.851837	0.804517	0.755358	0.679938
	16				0.662159	0.788808	0.822021	0.765343	0.773496	0.800921	0.79152	0.825776	0.764767	0.772219	0.739687
	17					0.797156	0.737057	0.717457	0.724841	0.776959	0.769478	0.773067	0.761915	0.765059
3	1					0.556341	0.548698	0.583294	0.575542	0.59661	0.585622	0.630101	0.623875	0.60516					3																		3
	2				0.582587	0.581761	0.594515	0.625664	0.61069	0.626598	0.66119	0.655818	0.711845	0.715964	0.647522
0.00732629	3			0.727211	0.645017	0.652851	0.646697	0.647712	0.637088	0.638303	0.63619	0.655188	0.726206	0.756312	0.69563	0.615175
	4		0.787256	0.787376	0.734324	0.714843	0.708016	0.731362	0.679037	0.657096	0.666225	0.703048	0.760351	0.729518	0.681356	0.664454	0.567706
	5	0.754232	0.750846	0.781457	0.717091	0.73369	0.76246	0.732616	0.725593	0.674646	0.669443	0.683271	0.712347	0.7179	0.669901	0.672527	0.671409	0.617768
	6	0.828701	0.785337	0.775331	0.674153	0.764445	0.782896	0.785967	0.72147	0.692207	0.70455	0.72446	0.737122	0.740947	0.71541	0.676052	0.711041	0.62871
	7	0.840813	0.812728	0.828318	0.699371	0.744248	0.805899	0.772075	0.725642	0.702103	0.722423	0.769938	0.753897	0.769696	0.684933	0.689567	0.679391	0.631332
	8	0.830767	0.776174	0.753288	0.703516	0.715701	0.756948	0.758698	0.750239	0.724962	0.818019	0.863636	0.808306	0.757975	0.732758	0.771016	0.68586	0.632494
	9	0.768939	0.765506	0.758893		0.668798	0.742954	0.782963	0.748745	0.71786	0.780945	0.747336	0.734578	0.705713	0.694756	0.65928	0.660136	0.595542
	10	0.769099	0.780793	0.757072	0.67746	0.642896	0.663944	0.754566	0.822676	0.796774	0.785681	0.712722	0.698521	0.654815	0.643527	0.628248	0.624534	0.560208
	11	0.782211	0.815398	0.772265	0.681841	0.716547	0.682428	0.688689	0.77678	0.78423	0.788221	0.754844	0.685477	0.675298	0.618825	0.645978	0.654775	0.579185
	12	0.684062	0.750035	0.738712	0.745051	0.691181	0.722613	0.699791	0.72897	0.783351	0.766946	0.742514	0.722873	0.642658	0.677715	0.635064	0.655253	0.593165
	13	0.641644	0.721291	0.76507	0.699203	0.75261	0.681163	0.689866	0.731315	0.770176	0.786625	0.833063	0.765318	0.711528	0.701372	0.706733	0.645462	0.572571
	14		0.619834	0.751255	0.747316	0.792068	0.758157	0.713485	0.736546	0.772589	0.762432	0.800118	0.783696	0.752979	0.745217	0.67097	0.631722
	15			0.694875	0.752911	0.772039	0.773446	0.798169	0.79274	0.810681	0.782728	0.814934	0.833419	0.795993	0.775605	0.686336
	16				0.727489	0.802147	0.81723	0.795559	0.73043	0.78145	0.731489	0.763526	0.809474	0.781229	0.792129
	17					0.805053	0.7453	0.732739	0.737742	0.758536	0.733995	0.772634	0.807401	0.773805
4	1					0.540913	0.599129	0.591691	0.598842	0.587498	0.564665	0.598117	0.598891	0.60924					4																		4
	2				0.598847	0.657432	0.632246	0.654266	0.610242	0.607376	0.663182	0.646252	0.688044	0.668178	0.613993
0.00767607	3			0.728314	0.706291	0.691319	0.681922	0.639166	0.649639	0.664426	0.668638	0.711087	0.738579	0.788994	0.692502	0.62291
	4		0.743938	0.762557	0.778672	0.721433	0.674974	0.678951	0.723673	0.663738	0.672152	0.683329	0.715259	0.689236	0.669812	0.641436	0.57356
	5	0.806947	0.811812	0.782201	0.75698	0.742275	0.788061	0.802329	0.732992	0.669937	0.67208	0.725988	0.691114	0.675376	0.66976	0.650587	0.619801	0.540954
	6	0.926199	0.811386	0.823507	0.806648	0.741686	0.803778	0.792308	0.798637	0.712339	0.776635	0.772709	0.732042	0.673491	0.656088	0.650493	0.643819	0.561433
	7	0.920088	0.893401	0.839035	0.746725	0.809108	0.848632	0.857528	0.8031	0.769233	0.769793	0.84441	0.812442	0.714173	0.679817	0.676131	0.662606	0.587193
	8	0.867672	0.830015	0.792151	0.691199	0.725188	0.791646	0.768293	0.796213	0.799973	0.789337	0.851904	0.794358	0.772399	0.713748	0.658001	0.671833	0.597374
	9	0.835173	0.814867	0.757158		0.759249	0.770045	0.764045	0.76737	0.73463	0.726469	0.742926	0.75764	0.783384	0.729499	0.659183	0.657324	0.564183
	10	0.766835	0.753159	0.783934	0.701126	0.685528	0.725246	0.743978	0.761496	0.749356	0.819958	0.707266	0.668449	0.674055	0.654789	0.647245	0.680035	0.570574
	11	0.755667	0.779177	0.793446	0.698313	0.702591	0.718054	0.702916	0.787652	0.748215	0.789739	0.776752	0.764932	0.710925	0.658266	0.667233	0.674822	0.585924
	12	0.672036	0.724194	0.746567	0.757743	0.754889	0.720194	0.688758	0.750932	0.746244	0.791222	0.777941	0.735486	0.695556	0.656619	0.687719	0.680094	0.624025
	13	0.607058	0.692077	0.723191	0.727917	0.726319	0.683276	0.67183	0.701842	0.778763	0.779674	0.823293	0.830361	0.782893	0.703463	0.708461	0.673385	0.576493
	14		0.6296	0.716631	0.740812	0.783842	0.74401	0.753387	0.764301	0.80431	0.803064	0.83413	0.827741	0.782855	0.741215	0.699744	0.619777
	15			0.646918	0.718516	0.760429	0.759559	0.796499	0.81043	0.850958	0.891477	0.841846	0.819208	0.810813	0.770078	0.706771
	16				0.722887	0.801539	0.792899	0.777062	0.796591	0.82055	0.830966	0.787104	0.777328	0.775806	0.753788
	17					0.773469	0.746707	0.733177	0.746495	0.824291	0.814069	0.821592	0.799299	0.757938
5	1					0.565809	0.579303	0.61036	0.612812	0.596479	0.603069	0.575647	0.587495	0.54245					5																		5
	2				0.576364	0.598707	0.668281	0.64306	0.675717	0.641496	0.652342	0.65069	0.680078	0.64766	0.588238
0.00729301	3			0.705164	0.686851	0.637182	0.673318	0.669946	0.705583	0.710223	0.665391	0.691085	0.712035	0.70518	0.671992	0.601003
	4		0.75074	0.742787	0.724222	0.728971	0.765655	0.709861	0.66242	0.65848	0.67783	0.729377	0.719541	0.684339	0.68381	0.669074	0.578292
	5	0.804165	0.789727	0.804707	0.763884	0.784697	0.840311	0.776936	0.747272	0.712739	0.720778	0.698904	0.694478	0.725889	0.688307	0.663698	0.624782	0.590103
	6	0.807509	0.810627	0.866337	0.776664	0.836399	0.821721	0.791174	0.764913	0.744217	0.77751	0.767342	0.728161	0.698151	0.631363	0.667509	0.655386	0.539592
	7	0.864928	0.799143	0.799389	0.739763	0.762162	0.801833	0.865428	0.783443	0.734045	0.761372	0.74304	0.777184	0.658434	0.703712	0.67867	0.667645	0.647725
	8	0.784102	0.743345	0.768315	0.678455	0.675047	0.739318	0.775627	0.758801	0.794535	0.844088	0.7951	0.846078	0.727626	0.767173	0.703897	0.667726	0.620737
	9	0.765445	0.772767	0.714793		0.711562	0.728298	0.77384	0.733217	0.780431	0.704743	0.769892	0.723907	0.669168	0.668596	0.691792	0.682935	0.620515
	10	0.763366	0.753069	0.737023	0.687532	0.661168	0.712358	0.707186	0.752868	0.784618	0.788955	0.744066	0.682912	0.651619	0.656194	0.693268	0.608132	0.538755
	11	0.71928	0.769712	0.728685	0.713696	0.666077	0.664385	0.645251	0.695614	0.742707	0.757051	0.803295	0.693958	0.681189	0.677377	0.647529	0.661724	0.539435
	12	0.668786	0.74313	0.757647	0.741924	0.7036	0.700835	0.675539	0.733256	0.75474	0.784836	0.755391	0.766635	0.686624	0.659123	0.670824	0.650148	0.614445
	13	0.605769	0.718224	0.736428	0.794949	0.791498	0.766127	0.719987	0.733408	0.778124	0.789344	0.791999	0.763141	0.709978	0.6982	0.705597	0.655783	0.550943
	14		0.652247	0.743552	0.822481	0.795017	0.784894	0.812449	0.793535	0.816225	0.784779	0.785519	0.78538	0.739823	0.691802	0.708153	0.620583
	15			0.714101	0.782893	0.794113	0.765413	0.796339	0.834355	0.820774	0.794497	0.807809	0.793751	0.787811	0.749976	0.674018
	16				0.710992	0.774454	0.736151	0.761249	0.826446	0.801772	0.804267	0.782785	0.78295	0.752293	0.736692
	17					0.803746	0.751472	0.712668	0.74313	0.779603	0.769393	0.779009	0.79544	0.78811
6	1					0.600353	0.565924	0.583345	0.554574	0.570687	0.617953	0.65176	0.585284	0.581882					6																		6
	2				0.594157	0.603529	0.630959	0.619814	0.616267	0.629129	0.633573	0.661706	0.686869	0.666642	0.642663
0.00744241	3			0.653553	0.644654	0.638782	0.653328	0.672831	0.655843	0.649697	0.616524	0.62138	0.703296	0.692506	0.681522	0.638349
	4		0.7068	0.727182	0.71008	0.672921	0.660085	0.669391	0.655812	0.652215	0.639004	0.635076	0.710948	0.720345	0.69731	0.727351	0.607577
	5	0.762312	0.800065	0.817781	0.733429	0.735169	0.768909	0.717082	0.704148	0.649873	0.66101	0.657684	0.662858	0.691885	0.656371	0.691764	0.656018	0.559965
	6	0.825178	0.86121	0.874527	0.772886	0.764039	0.836845	0.84352	0.723802	0.696568	0.768209	0.717558	0.662844	0.662276	0.660741	0.700017	0.65257	0.581977
	7	0.820643	0.853295	0.896281	0.829182	0.828659	0.802924	0.810564	0.813087	0.772784	0.797971	0.756498	0.724546	0.688316	0.692384	0.697057	0.664024	0.600479
	8	0.857269	0.813454	0.793083	0.795779	0.729023	0.749289	0.78411	0.817419	0.803519	0.800596	0.791359	0.806605	0.750404	0.752976	0.681105	0.700116	0.668952
	9	0.768462	0.776156	0.775531		0.677919	0.76358	0.759367	0.791888	0.773512	0.751177	0.713619	0.770993	0.731803	0.686794	0.650438	0.687202	0.603265
	10	0.740628	0.738143	0.706226	0.673749	0.686824	0.765694	0.715619	0.754573	0.792352	0.761539	0.749043	0.72705	0.641546	0.631546	0.62063	0.625991	0.521173
	11	0.758578	0.759233	0.776987	0.687193	0.674776	0.704327	0.733728	0.768708	0.788615	0.786379	0.768582	0.668708	0.633114	0.630148	0.654066	0.651135	0.529833
	12	0.676016	0.680903	0.706248	0.690312	0.703336	0.714263	0.692407	0.736118	0.776917	0.766169	0.775323	0.693365	0.683605	0.66494	0.685348	0.67976	0.591628
	13	0.632455	0.650421	0.706457	0.734543	0.733531	0.666963	0.729672	0.715833	0.729681	0.783653	0.791612	0.730902	0.715587	0.700035	0.673376	0.666768	0.56954
	14		0.649346	0.736459	0.751876	0.787419	0.742355	0.753359	0.764615	0.80974	0.785796	0.808922	0.795722	0.755805	0.703417	0.704875	0.65048
	15			0.720711	0.788155	0.768292	0.802682	0.78348	0.868789	0.799538	0.799166	0.804873	0.813911	0.785924	0.768236	0.672135
	16				0.700763	0.807912	0.812235	0.83033	0.805253	0.786262	0.776693	0.798694	0.786801	0.736975	0.730414
	17					0.800336	0.730907	0.750371	0.75776	0.773286	0.775082	0.763237	0.758297	0.727287
7	1					0.5655	0.607251	0.602249	0.600509	0.598503	0.59335	0.637468	0.60664	0.592194					7																		7
	2				0.598061	0.631105	0.663939	0.642435	0.666689	0.634677	0.638408	0.6505	0.691558	0.649978	0.593932
	3			0.732355	0.665399	0.651975	0.672743	0.638638	0.677559	0.67496	0.675751	0.653398	0.744657	0.755916	0.649288	0.597466
	4		0.814882	0.752837	0.711058	0.720285	0.657996	0.676045	0.668083	0.624732	0.630954	0.685812	0.696412	0.675648	0.665403	0.66243	0.561435
	5	0.767148	0.770328	0.763986	0.719788	0.747944	0.776749	0.761751	0.710451	0.672542	0.65832	0.673704	0.682628	0.700918	0.673929	0.64465	0.63747	0.575464
	6	0.800083	0.845735	0.825032	0.767108	0.805829	0.843752	0.79125	0.726464	0.715029	0.712243	0.700575	0.715981	0.711765	0.681884	0.649497	0.687305	0.567537
	7	0.881474	0.841647	0.843052	0.83216	0.792122	0.846979	0.789526	0.762359	0.73101	0.803987	0.75649	0.723045	0.696694	0.667026	0.729487	0.674738	0.583406
	8	0.834807	0.835243	0.791775	0.743203	0.724424	0.755921	0.729344	0.741783	0.733346	0.781014	0.783976	0.750483	0.718366	0.704012	0.731856	0.677207	0.593574
	9	0.760751	0.760842	0.732762		0.731701	0.801249	0.736315	0.734712	0.740341	0.684635	0.68972	0.726165	0.714557	0.66769	0.640878	0.664715	0.559368
	10	0.765242	0.780035	0.771883	0.692049	0.703842	0.78808	0.704398	0.714091	0.728232	0.715012	0.729582	0.661087	0.653394	0.651923	0.640259	0.589879	0.515586
	11	0.724746	0.756274	0.773234	0.697638	0.740824	0.684965	0.685962	0.749009	0.756861	0.82633	0.780959	0.709729	0.669735	0.650033	0.680854	0.655973	0.536365
	12	0.676665	0.729003	0.754726	0.747604	0.753411	0.716309	0.660362	0.718796	0.796607	0.78293	0.78726	0.806947	0.667938	0.684006	0.690035	0.635069	0.592914
	13	0.585148	0.635791	0.704167	0.747023	0.824212	0.737726	0.668832	0.671398	0.720091	0.793439	0.837488	0.829465	0.723512	0.693234	0.690231	0.65312	0.567653
	14		0.576319	0.677355	0.777298	0.846065	0.761856	0.767212	0.751384	0.793682	0.804529	0.828154	0.804568	0.732824	0.7219	0.688034	0.628928
	15			0.700035	0.768218	0.793379	0.801512	0.799853	0.80991	0.832034	0.832185	0.833837	0.846377	0.802674	0.723616	0.669528
	16				0.740163	0.814216	0.765779	0.758442	0.77775	0.842173	0.793176	0.815609	0.776424	0.748788	0.722819
	17					0.791759	0.787138	0.752779	0.733838	0.786724	0.802219	0.787006	0.799063	0.75082
8	1					0.536461	0.555665	0.62946	0.647237	0.670188	0.628545	0.614513	0.644394	0.623173					8																		8
	2				0.597266	0.59551	0.632466	0.620684	0.681342	0.655224	0.683207	0.670565	0.697372	0.696109	0.635766
0.00749203	3			0.717701	0.686379	0.649023	0.657948	0.647848	0.679876	0.686628	0.692051	0.710234	0.68671	0.731897	0.75576	0.634792
	4		0.779464	0.757298	0.735944	0.697743	0.693524	0.689342	0.693272	0.707456	0.67295	0.664186	0.698237	0.705174	0.708552	0.684053	0.600158
	5	0.82582	0.816842	0.82485	0.752225	0.740714	0.788508	0.799307	0.779383	0.70813	0.722817	0.680575	0.700604	0.70826	0.657739	0.6933	0.636029	0.604811
	6	0.909592	0.854977	0.826584	0.782407	0.770578	0.833156	0.810983	0.760045	0.716651	0.758043	0.753438	0.72572	0.695478	0.721339	0.732973	0.681482	0.614721
	7	0.80751	0.815629	0.816204	0.761826	0.805444	0.861087	0.794556	0.838372	0.751311	0.827601	0.807976	0.74566	0.716713	0.697328	0.711516	0.699116	0.592279
	8	0.854263	0.832126	0.773836	0.705799	0.711619	0.783213	0.748361	0.741054	0.83286	0.853559	0.807241	0.792647	0.772809	0.711583	0.765371	0.730643	0.608603
	9	0.73047	0.790687	0.78948		0.711991	0.74931	0.760059	0.721845	0.734999	0.81383	0.73448	0.707518	0.688987	0.708342	0.646347	0.671318	0.539681
	10	0.77794	0.790404	0.772929	0.690694	0.696619	0.689471	0.721559	0.735911	0.737714	0.724868	0.685835	0.701366	0.652538	0.644447	0.624642	0.642736	0.559251
	11	0.754392	0.763122	0.781328	0.70737	0.703804	0.694287	0.677573	0.70113	0.743363	0.734076	0.754867	0.747029	0.648013	0.622986	0.629442	0.649162	0.543029
	12	0.713918	0.719717	0.742549	0.736426	0.741213	0.72112	0.656684	0.707979	0.710851	0.739592	0.756555	0.744623	0.672521	0.656314	0.65064	0.643126	0.582108
	13	0.603688	0.700805	0.713903	0.718332	0.722056	0.702086	0.7047	0.708195	0.787916	0.789588	0.843344	0.749954	0.707873	0.686446	0.661319	0.649695	0.566436
	14		0.61831	0.726897	0.759651	0.724118	0.726009	0.738546	0.760029	0.77952	0.805588	0.851422	0.770788	0.727218	0.677055	0.690857	0.656932
	15			0.698048	0.788402	0.773191	0.766706	0.744187	0.763916	0.846599	0.816871	0.784481	0.78543	0.768341	0.768816	0.659161
	16				0.735721	0.773789	0.758669	0.730002	0.768435	0.795013	0.778949	0.787265	0.7753	0.77662	0.724427
	17					0.798349	0.802245	0.704955	0.728895	0.766562	0.821709	0.750536	0.774506	0.736767
9	1					0.545075	0.573298	0.642336	0.627356	0.625036	0.621099	0.676623	0.588412	0.570432					9																		9
	2				0.642534	0.612923	0.647113	0.68602	0.681118	0.666884	0.663848	0.673462	0.66297	0.633981	0.646971
0.00727049	3			0.68361	0.677883	0.672592	0.682699	0.685596	0.681828	0.673039	0.680859	0.676501	0.723136	0.730998	0.684054	0.649748
	4		0.755906	0.757544	0.738559	0.694747	0.692058	0.682251	0.664143	0.650951	0.631636	0.665265	0.716428	0.707936	0.673133	0.710222	0.656699
	5	0.775658	0.771686	0.748392	0.742327	0.766154	0.742872	0.753963	0.710822	0.675558	0.693271	0.656211	0.64015	0.633552	0.656573	0.686845	0.69112	0.593494
	6	0.823568	0.812954	0.759432	0.739159	0.829135	0.789261	0.75967	0.691412	0.715839	0.74766	0.741189	0.692033	0.627418	0.662727	0.657802	0.659285	0.578612
	7	0.83464	0.82533	0.800873	0.742519	0.783837	0.807756	0.771136	0.79595	0.791995	0.764856	0.767505	0.718022	0.684854	0.663788	0.676193	0.674649	0.585521
	8	0.828756	0.776711	0.793946	0.688728	0.762693	0.786298	0.747347	0.742864	0.776772	0.774656	0.816423	0.776636	0.75172	0.740811	0.693135	0.642921	0.612169
	9	0.770852	0.765739	0.751019		0.723997	0.793691	0.742478	0.719662	0.73811	0.74058	0.750875	0.709313	0.696436	0.711873	0.666415	0.653553	0.569489
	10	0.775736	0.738201	0.807772	0.713043	0.681564	0.728418	0.718265	0.741808	0.769795	0.754654	0.732374	0.728951	0.675586	0.647243	0.636051	0.635763	0.534398
	11	0.740914	0.763409	0.758138	0.712112	0.728939	0.666736	0.668329	0.680139	0.762502	0.769888	0.781806	0.714699	0.662325	0.631287	0.643587	0.654575	0.531056
	12	0.66253	0.720506	0.766241	0.717022	0.721529	0.698212	0.682217	0.709311	0.776084	0.766206	0.815297	0.754643	0.687678	0.665641	0.64658	0.657716	0.587794
	13	0.604168	0.722131	0.732495	0.749977	0.729164	0.7208	0.742987	0.713911	0.819475	0.761816	0.837036	0.778999	0.732784	0.672692	0.661005	0.640544	0.548115
	14		0.628644	0.679017	0.777667	0.784652	0.782161	0.752935	0.752637	0.786374	0.794034	0.833938	0.822249	0.758367	0.722455	0.683033	0.626509
	15			0.645785	0.766281	0.817565	0.774195	0.814563	0.821663	0.800711	0.808225	0.826103	0.800717	0.746956	0.756507	0.691918
	16				0.689223	0.84475	0.781554	0.837772	0.794351	0.797852	0.804889	0.75677	0.759603	0.729475	0.714963
	17					0.853499	0.775846	0.71634	0.750439	0.802014	0.800526	0.770053	0.744414	0.73723
10	1					0.595326	0.644286	0.648374	0.588058	0.614809	0.588334	0.617432	0.671139	0.582392					10																		10
	2				0.613546	0.611013	0.676778	0.698598	0.645277	0.604256	0.637787	0.671802	0.714979	0.698478	0.656726
0.0628987	3			0.750459	0.682748	0.720163	0.71882	0.736457	0.668596	0.654817	0.671668	0.692488	0.732618	0.721787	0.69661	0.614426
	4		0.778017	0.79072	0.726336	0.736674	0.737934	0.713677	0.686796	0.64173	0.633932	0.686739	0.725376	0.710571	0.669982	0.662355	0.616352
	5	0.811283	0.797372	0.790533	0.759942	0.752612	0.752114	0.737419	0.712702	0.672268	0.682709	0.713893	0.714973	0.716933	0.700512	0.694053	0.664594	0.60294
	6	0.816711	0.838608	0.837332	0.77408	0.806375	0.784027	0.759497	0.747276	0.705917	0.724219	0.709169	0.712721	0.694199	0.685822	0.697207	0.73211	0.613473
	7	0.848941	0.798111	0.826697	0.746822	0.77496	0.742319	0.753946	0.744331	0.748118	0.770468	0.752916	0.780421	0.695415	0.697298	0.706375	0.678212	0.630184
	8	0.774061	0.801989	0.762674	0.682091	0.716838	0.742899	0.704688	0.716138	0.736178	0.826238	0.828527	0.830421	0.717532	0.716518	0.697913	0.735816	0.599611
	9	0.738421	0.803216	0.750104		0.665647	0.718431	0.696913	0.705036	0.72649	0.707819	0.739052	0.763287	0.697975	0.721649	0.672291	0.702923	0.544946
	10	0.769713	0.767761	0.777771	0.653416	0.652624	0.684772	0.708183	0.740557	0.773092	0.774498	0.732394	0.711774	0.655065	0.668457	0.641341	0.611964	0.510294
	11	0.768292	0.805612	0.79025	0.672288	0.658755	0.662193	0.743294	0.71542	0.788429	0.789567	0.791408	0.720246	0.672069	0.645438	0.683491	0.656965	0.528907
	12	0.667176	0.753091	0.743889	0.755512	0.716706	0.716483	0.700819	0.708132	0.786071	0.780907	0.762801	0.729595	0.689466	0.663272	0.66537	0.618676	0.59348
	13	0.632936	0.703945	0.742542	0.778633	0.783266	0.730665	0.737522	0.747708	0.756638	0.805239	0.801122	0.713606	0.722353	0.691234	0.670469	0.630404	0.539761
	14		0.674745	0.681121	0.784095	0.76382	0.756198	0.743457	0.752267	0.801365	0.839036	0.816247	0.775375	0.720279	0.691495	0.66103	0.585933
	15			0.716631	0.821011	0.768131	0.771488	0.801018	0.790746	0.780841	0.794342	0.787853	0.789513	0.804137	0.751864	0.653013
	16				0.707602	0.734104	0.788291	0.766088	0.749234	0.775538	0.775836	0.774483	0.748592	0.740541	0.746133
	17					0.754616	0.766981	0.711921	0.704272	0.735	0.744841	0.791351	0.767185	0.721104

## Sheet: Pref
Preferentiality
Signals of insufficient quality were excluded from the property maps. Signals could be rejected based on noise low amplitude, large artefact or ventricluar farfields that could not be substracted.
		1	2	3	4	5	6	7	8	9	10	11	12	13	14	15	16	17
1	1					2.29908	2.0884	1.97256	1.91975	1.82487	0.623713	1.86513	2.24625	2.35484					1																		1
	2				1.77368	1.74144	2.12915	2.02659	2.04877	2.24325	2.78727	2.83002	2.5556	2.51042	2.43188
0.00779495	3			1.51204	2.87234	2.19356	2.02809	1.98037	1.91246	2.07558	2.52522	2.67247	2.73144	2.57242	2.62103	2.54283
	4		1.78837	1.9535	2.79644	2.82933	1.90543	1.84813	1.74334	1.96093	2.30289	2.4927	2.70595	2.55158	2.69742	2.74245	2.7546
	5	1.71013	1.73422	2.11302	2.88254	0.438911	1.19246	1.54346	1.88654	2.23889	2.39405	2.60709	2.60498	2.75057	2.65952	2.79645	2.84251	2.85915
	6	1.63918	1.73047	1.93033	3.12155	0.216935	1.30775	1.70285	2.17465	2.64438	2.74424	2.72586	2.80086	2.71056	2.79366	2.92313	2.92613	3.05065
	7	1.52919	1.60942	1.43425	0.190054	3.06613	2.6607	1.85128	1.96731	2.482	2.32031	2.44322	1.68376	2.97303	3.02358	3.11663	3.02252	3.09797
	8	1.51967	1.48251	1.5216	2.68642	2.89608	3.05896	1.09304	1.9292	1.87807	2.35608	1.69663	0.861134	0.561875	0.248265	0.184924	0.09924	3.13042
	9	1.6393	1.662	1.65194		2.61681	3.05906	0.940592	1.43339	1.79926	2.76608	1.58423	1.25516	1.13585	0.835686	0.465338	0.282357	0.0970991
	10	1.79729	1.73032	1.71586	1.63885	1.82466	2.83965	0.462059	1.26775	1.65179	1.90523	1.60104	1.60167	1.42931	1.46832	1.04777	0.763589	0.22521
	11	1.89297	1.78429	1.81423	1.73975	1.71027	0.920896	1.19044	1.22633	1.54499	1.68874	1.61163	1.75597	1.66102	1.7223	2.04172	1.64408	0.0910359
	12	1.86612	1.80837	1.7141	1.57511	1.18662	1.26762	1.52119	1.42381	1.5574	1.70634	1.88325	1.96589	2.00519	2.02178	2.41766	2.22747	0.335292
	13	2.19654	1.73502	1.51376	1.1758	1.06161	1.4509	1.60785	1.71008	1.89114	2.1526	2.25881	2.16822	2.12234	2.21851	2.50021	2.57497	0.344875
	14		1.98734	1.6287	0.927793	1.19425	1.9598	2.01625	2.01762	2.1849	2.21124	2.28439	2.18653	2.13559	2.2407	0.604999	0.584317
	15			2.488	2.66449	2.34763	2.49739	2.34373	2.29126	2.30583	2.36374	2.33934	2.15616	2.19399	0.998589	0.601421
	16				2.50899	2.46447	2.44312	2.41811	2.42242	2.38473	2.29662	2.17767	2.0864	1.54309	0.964573
	17					2.16805	2.37948	2.48641	2.52165	2.32144	2.27117	2.12859	1.4169	1.2428
2	1					1.91568	1.78322	1.96192	1.70601	1.3516	1.16228	1.53211	2.40672	2.40648					2																		2
	2				1.62274	1.90734	2.00828	1.94001	1.97389	1.53519	1.23614	0.0185814	2.91526	2.64253	2.52774
0.0074415	3			1.34491	1.74916	1.97664	1.81469	1.88871	1.83535	1.64834	1.93765	2.73005	2.88463	2.87018	2.66389	2.54009
	4		1.63969	1.80031	2.79826	1.30882	1.56037	1.55706	1.88259	1.93587	2.07903	2.52942	2.64904	2.79221	2.72063	2.75236	2.74922
	5	1.64505	1.70806	1.88831	2.59778	0.767054	1.24384	1.41701	1.79483	2.30236	2.23151	2.4344	2.35639	2.87434	2.76917	2.97369	2.88533	2.92976
	6	1.66189	1.74453	1.90062	1.9845	0.650142	1.0496	1.39353	1.913	2.39983	2.57856	2.53206	2.47184	2.76051	3.0695	0.0816594	3.02749	3.0351
	7	1.53134	1.53294	1.39739	0.404411	0.107045	0.740546	1.32674	1.67175	2.62119	2.73713	2.65629	2.76942	2.95618	0.0228761	3.13783	0.0593335	3.13592
	8	1.47915	1.46436	1.46038	0.370281	2.77228	2.98168	1.28668	1.58902	2.11981	2.79533	0.716189	0.719289	0.986101	0.764644	3.06643	0.0094843	3.07439
	9	1.59197	1.53127	1.65147		2.70981	2.85953	0.688228	1.43167	1.82334	0.0873974	1.56743	1.3502	1.26591	1.3009	0.0566055	0.123096	3.10849
	10	1.76894	1.78678	1.77986	1.86735	2.36516	1.7771	0.588696	1.22979	1.45403	2.08283	1.82269	1.72942	1.6972	1.55066	1.53891	1.03186	3.10893
	11	1.88825	1.75977	1.72544	2.03766	2.35811	1.20277	0.997191	1.07293	1.32173	1.45501	1.79681	1.8271	1.75119	1.63414	2.15747	2.22901	3.05235
	12	1.83019	1.8286	1.58995	1.41056	1.32065	1.0461	1.26897	1.30225	1.38004	1.63695	1.88242	1.95	1.90627	1.90218	2.17444	2.2081	0.227844
	13	2.05566	1.79298	1.72872	1.07024	0.924066	1.51175	1.62762	1.55816	1.81468	2.37032	2.20965	2.08856	2.0088	2.13934	2.32276	2.6796	0.43172
	14		2.1341	1.70418	1.01897	1.55841	1.90378	2.05058	2.01671	2.24904	2.37021	2.24337	2.01788	1.98325	2.03141	0.792802	0.526697
	15			2.58847	2.7327	2.25666	2.34714	2.35644	2.42515	2.45522	2.51514	2.38733	2.21221	2.0954	1.06626	0.370284
	16				2.67992	2.30011	2.27424	2.33819	2.45321	2.49441	2.44889	2.35036	2.27171	1.79867	0.940002
	17					2.32686	2.35543	2.52281	2.52158	2.29044	2.39106	2.24661	1.48271	1.43746
3	1					1.7989	1.73393	2.00951	1.94264	1.30693	0.873314	1.04473	2.26301	2.30937					3																		3
	2				1.39539	1.77808	1.97921	2.05634	2.18574	1.96594	0.806434	2.62999	2.6778	2.50474	2.32661
0.00732629	3			1.22974	1.10748	1.65499	1.84934	2.07006	1.96602	1.95734	2.1062	2.73329	2.71443	2.61083	2.50367	2.4652
	4		1.63903	2.27849	0.0028124	0.307728	2.15928	1.75776	1.68701	2.11289	1.97544	2.43146	2.60957	2.58845	2.5657	2.61548	2.57461
	5	1.64407	1.63349	1.89053	3.10373	0.438195	1.05863	1.78016	1.56477	2.21111	2.72099	2.58344	2.50253	2.6048	2.76481	2.72286	2.85415	2.90562
	6	1.66497	1.6211	1.47894	3.07411	0.568812	0.986963	1.32009	2.26702	2.90662	0.0915983	2.97475	2.50799	2.82049	2.74298	2.93958	2.89354	3.09712
	7	1.48609	1.55446	1.3609	0.536995	0.466217	0.978915	1.49926	1.52148	2.91194	3.05496	2.75568	2.89787	3.00131	2.9411	0.0489969	3.08873	0.115327
	8	1.51821	1.51923	1.37674	0.939598	0.256173	1.10339	1.20146	1.52197	1.54182	0.875377	2.47176	1.0972	0.662448	0.0624588	0.242034	0.111709	0.106537
	9	1.59488	1.62305	1.67827		3.04342	2.01138	1.26119	1.34976	1.59614	2.65836	1.60617	1.28236	1.33685	1.16297	0.39245	0.341593	0.0626233
	10	1.78747	1.80137	1.77087	1.72268	2.31915	1.24584	1.00202	1.3283	1.4202	1.41829	1.58637	1.60725	1.61364	1.54336	1.50318	1.32527	3.03365
	11	1.89876	1.80122	1.73166	1.80417	0.652436	0.911682	1.28444	1.25649	1.46401	1.54901	1.79435	1.78865	1.74891	1.73522	2.04787	1.97064	2.84191
	12	1.88061	1.73218	1.67651	0.953861	0.646468	1.24551	1.39468	1.29723	1.31955	1.50629	1.90684	1.9297	1.96859	2.01665	2.32051	2.24152	3.09357
	13	1.96128	1.71788	1.49369	1.06061	1.00894	1.4706	1.64425	1.5861	1.73791	2.71131	2.13396	2.01618	2.02038	2.02869	2.18547	2.65889	0.226423
	14		1.85444	1.45571	1.12743	1.15643	1.99544	1.98373	2.02045	2.35153	2.4857	2.15891	1.97481	1.95892	1.97973	2.00532	0.496161
	15			2.28216	2.62561	2.24364	2.26948	2.13064	2.24031	2.36485	2.52293	2.3503	2.22885	1.88882	1.27792	2.86583
	16				2.60986	2.49548	2.50419	2.40876	2.41818	2.41903	2.50932	2.36651	2.19904	1.74169	1.07213
	17					2.43644	2.67238	2.35897	2.36471	2.32444	2.40642	2.28599	1.58499	1.15664
4	1					1.88123	1.77032	1.83952	1.68273	1.54278	1.03109	0.341066	2.15227	2.23921					4																		4
	2				1.47875	1.84265	1.96363	1.97054	1.75082	1.77569	2.91108	0.0529411	2.38445	2.40849	2.39985
0.00767607	3			1.40938	1.71294	1.97566	1.88837	1.89655	1.80172	1.69472	2.57027	2.85781	2.61458	2.57117	2.47689	2.50936
	4		1.90849	2.52639	2.85125	2.82693	1.9385	1.73584	1.88926	1.98781	2.28861	2.48173	2.5819	2.62507	2.69004	2.61677	2.71968
	5	1.57196	1.73566	2.06322	0.18451	0.337064	0.874237	0.984211	1.52912	2.39723	2.41382	2.60662	2.52553	2.71245	2.65093	2.76463	2.73088	2.84295
	6	1.56293	1.53285	0.508687	0.0798711	0.34473	0.899675	1.30113	0.444064	3.12932	0.169032	2.48489	2.78257	2.80566	2.89881	2.87392	2.89582	2.98702
	7	1.60536	1.61769	1.22494	0.232461	0.238393	0.789058	1.28662	1.67319	0.192512	0.296217	0.73558	0.782829	2.70233	0.0337068	2.98559	3.09712	0.0104904
	8	1.62713	1.58622	1.6527	2.91987	2.96147	0.62041	0.980556	1.05831	1.09894	0.992122	1.31629	1.08094	0.803829	0.346066	0.259748	0.0862205	0.0116981
	9	1.58902	1.63549	1.70404		2.60548	2.50612	1.25777	1.25299	1.5876	1.16342	1.40051	1.41523	1.3548	1.03477	0.410831	0.331627	0.0703159
	10	1.73361	1.78334	1.7526	1.76049	2.22637	2.20976	1.10319	1.37743	1.52516	1.9552	1.84801	1.6916	1.58056	1.10365	0.913351	0.746917	0.191544
	11	1.77636	1.72939	1.7475	1.9399	2.48581	1.98782	1.54529	1.48672	1.42853	1.48661	1.93648	1.81072	1.7987	1.66406	2.1721	0.989633	0.0984827
	12	1.84459	1.78219	1.6859	1.21734	0.671318	1.66006	1.62397	1.51592	1.38463	1.52939	2.04926	2.06816	1.96759	2.04774	2.37175	2.05337	0.207704
	13	2.0724	1.77439	1.68175	1.11919	0.837229	1.44185	1.79292	1.60991	2.06642	2.33697	2.25367	2.07211	2.15362	2.22428	2.27234	2.75641	0.318735
	14		1.91096	1.59985	0.845817	1.99426	2.27862	2.11563	2.05504	2.27189	2.33449	2.33385	2.02259	2.10931	2.27396	0.137445	0.359056
	15			2.68111	2.48124	2.39206	2.3494	2.35044	2.27787	2.3509	2.42429	2.49573	2.47295	2.44183	0.796321	0.316393
	16				2.56843	2.37455	2.44377	2.34308	2.31091	2.33924	2.37841	2.43063	2.42992	1.77381	0.860249
	17					2.40221	2.50259	2.52325	2.26922	2.16752	2.39156	2.45015	2.36379	1.96592
5	1					2.13933	2.07215	1.89648	1.60697	1.25757	1.02085	1.41571	2.29565	2.30991					5																		5
	2				1.59262	1.75914	1.96672	1.95947	1.756	1.294	1.12153	3.0031	2.4187	2.5117	2.4387
0.00729301	3			1.28136	1.94144	1.93104	2.06289	1.85247	1.75516	1.72566	1.86412	2.48996	2.62651	2.54713	2.5614	2.48374
	4		1.43697	2.1738	3.04617	2.47843	1.5775	1.7612	1.9346	2.15019	2.12003	2.33914	2.518	2.68377	2.68405	2.6455	2.62733
	5	1.4976	1.60931	1.83333	3.03112	0.488535	1.232	1.76249	2.03745	2.20359	2.1471	2.43878	2.33405	2.64804	2.70156	2.75292	2.84092	2.83681
	6	1.6993	1.70144	1.648	3.11813	0.552203	0.99936	1.70397	2.12745	2.56646	2.48628	2.44463	2.52059	2.66123	2.75271	2.8802	2.97719	3.02332
	7	1.57616	1.58437	1.35445	0.512658	0.143899	0.931737	1.62294	2.10008	2.85687	2.54616	2.73738	2.70118	2.88142	3.04074	3.01194	3.12465	0.0360966
	8	1.52757	1.47293	1.49816	2.79346	0.00146641	3.13189	1.19268	1.38356	1.54916	0.469221	0.920148	0.596892	0.325294	0.331366	0.112328	0.0398234	0.0551611
	9	1.54717	1.61411	1.7325		2.95382	1.697	1.06414	1.32559	1.69241	0.0888753	1.273	1.03296	1.05196	0.926523	0.560961	0.15013	0.0420403
	10	1.70924	1.70723	1.7744	1.63056	1.55862	0.438772	0.875892	1.28055	1.59564	1.693	1.46996	1.45953	1.42227	1.33374	1.16084	0.716519	0.0821853
	11	1.78633	1.75482	1.76491	1.92156	0.345718	1.01453	1.14283	1.26857	1.39819	1.31331	1.63343	1.75957	1.8277	1.6116	1.57226	0.950318	0.0220298
	12	2.06441	1.7855	1.6961	1.16908	0.744946	1.28408	1.45408	1.5114	1.42867	1.43013	1.81346	1.96794	1.96839	1.8543	2.28002	0.868018	0.224639
	13	2.13364	1.96218	1.6558	1.14346	0.823255	1.4727	1.69715	1.61151	1.77057	2.54605	2.29297	2.08377	2.02585	2.26242	2.37372	2.62507	0.359838
	14		2.1372	1.95126	0.586027	2.28919	2.34861	2.20548	2.12087	2.34022	2.37861	2.36503	2.41126	2.18236	2.02292	0.466679	0.617458
	15			2.52752	2.56525	2.43576	2.46832	2.29473	2.351	2.36915	2.42113	2.41703	2.3115	2.55981	1.02566	0.618726
	16				2.50377	2.49843	2.39256	2.29916	2.34485	2.42272	2.43456	2.433	2.42753	1.02252	0.961395
	17					2.41931	2.41834	2.35964	2.34694	2.27111	2.39301	2.39581	0.102235	0.485405
6	1					0.915619	1.98423	1.98758	1.71898	1.60856	2.06459	1.70649	2.39638	2.4419					6																		6
	2				1.22214	1.71439	2.22038	2.23136	2.11058	2.11398	2.73816	2.6905	2.59444	2.60507	2.52375
0.00744241	3			1.42077	0.601969	1.94646	2.25599	2.11513	2.32874	2.2991	2.37306	2.52087	2.63215	2.68808	2.63355	2.54554
	4		1.68926	1.88633	2.45446	0.971571	1.81719	1.67424	1.95335	2.16166	2.05501	2.43615	2.6447	2.74068	2.75619	2.75225	2.62564
	5	1.81066	1.87793	2.03267	2.32298	0.638026	0.943043	1.67681	2.25606	2.29298	2.06686	2.29599	2.48637	2.68059	2.83268	2.90387	2.84636	2.87677
	6	1.89059	1.85834	1.7307	2.44273	0.0415251	0.437153	1.6259	2.4317	2.79117	1.90552	2.61269	2.53384	2.66032	2.88773	3.10232	3.03511	3.01591
	7	1.74103	1.71732	1.6478	0.110183	3.07871	1.00233	1.65669	1.90207	2.98468	2.40179	0.877644	0.957286	0.479095	0.215557	0.194472	0.0653254	0.00505406
	8	1.6307	1.60467	1.63997	2.0651	3.07011	2.77835	1.13515	1.71471	1.89823	1.08675	1.20625	0.95564	0.709092	0.517338	0.210977	0.0352912	3.13708
	9	1.60591	1.61721	1.73087		2.51974	2.39167	0.989431	1.48505	1.60966	1.14853	1.50318	1.18751	1.17281	0.905026	0.234655	0.200143	3.1409
	10	1.80906	1.82774	1.8159	1.86132	2.02939	1.18569	0.903721	1.43175	1.35618	2.40098	1.8205	1.6146	1.57004	1.54558	0.699286	0.367146	3.1229
	11	1.886	1.86742	1.79671	1.97421	2.19676	0.851692	1.13783	1.21559	1.47262	1.52691	1.91739	1.82103	1.7191	1.82031	1.58388	0.359679	3.04539
	12	1.83189	1.84645	1.80137	1.60839	1.00233	1.33777	1.40688	1.48619	1.51995	1.87294	2.0251	1.95691	1.97129	1.80877	2.47494	0.217024	0.117016
	13	2.17398	1.81107	1.57804	1.17738	1.01621	1.3446	1.5892	1.66266	1.81081	2.20695	2.21143	2.18366	2.03766	2.14899	2.40295	2.93524	0.320377
	14		2.02738	1.46377	1.13638	1.02129	1.64793	1.8688	1.90853	2.30826	2.36367	2.17205	1.9891	2.1092	2.21629	0.411292	0.439419
	15			2.29068	2.88171	2.46381	2.39164	2.21917	2.25824	2.39597	2.42357	2.35595	2.24301	2.37418	0.771954	0.5307
	16				2.49786	2.45412	2.35621	2.28725	2.3145	2.46656	2.42678	2.35756	2.2097	1.86347	1.08555
	17					2.26794	2.47528	2.17642	2.36488	2.3327	2.49387	2.34067	2.19263	1.82469
7	1					2.4609	2.27867	2.06218	1.7788	1.55468	1.13979	2.07727	2.33167	2.35691					7																		7
	2				1.31996	2.02662	2.34581	2.35096	2.1733	1.35799	1.96889	2.80077	2.53296	2.4587	2.42438
	3			1.73053	2.94015	2.35231	2.32332	2.24839	1.72937	1.73549	1.93015	2.5748	2.63328	2.52228	2.51214	2.47394
	4		1.56755	1.61067	0.0247805	0.00864718	0.972286	1.78908	1.96018	1.85402	1.99802	2.25422	2.58116	2.49804	2.59661	2.66614	2.75466
	5	1.72582	1.6911	1.859	2.62533	0.382041	1.15565	1.57328	2.25709	2.23398	2.25304	2.30965	2.40849	2.55498	2.59911	2.76733	2.78805	2.89542
	6	1.66303	1.74034	1.78553	3.1198	0.594725	1.05727	1.60002	2.33384	2.64017	2.45286	2.37647	2.31854	2.31904	2.71589	2.89393	2.87437	3.01049
	7	1.60429	1.62429	1.60725	0.808257	0.628161	0.986095	1.18691	2.48772	2.47163	2.38219	2.21808	2.21545	2.38078	3.04071	0.130338	3.10672	3.11989
	8	1.58731	1.63864	1.58251	2.76192	2.9825	0.493174	0.367308	0.743227	2.74675	0.785924	0.780833	0.924407	1.03679	0.266615	0.152465	0.0150482	3.08296
	9	1.71693	1.63396	1.70112		2.40552	0.352995	0.418807	0.899071	2.3929	3.10506	1.43076	1.17903	1.16174	0.59409	0.608211	0.206362	0.0657259
	10	1.88147	1.88629	1.87094	1.87452	1.97011	2.23132	0.279804	0.916092	0.930009	0.193388	1.83371	1.49548	1.59185	1.38571	0.857184	0.0942483	0.0260598
	11	1.91348	1.86679	1.89538	1.84774	1.75932	1.60363	1.1783	1.23097	1.42595	1.59129	1.83432	1.87129	1.74335	1.66426	1.92513	0.359132	3.0722
	12	1.85934	1.79277	1.77408	1.57868	1.49259	1.26762	1.47939	1.556	1.42218	1.8487	2.06459	1.98206	2.07342	2.04252	2.67265	0.409757	0.104624
	13	2.08307	1.53702	1.43938	1.04843	1.11192	1.32365	1.5983	1.70941	1.8447	2.27034	2.20961	2.0887	2.18977	2.36015	2.68558	2.80479	0.283512
	14		1.89074	1.52426	0.747555	0.957092	1.70365	2.03126	1.97783	2.33837	2.30254	2.16815	2.10618	2.27082	2.10116	0.073113	0.470338
	15			2.68835	2.75379	2.58743	2.33409	2.19296	2.1942	2.28933	2.41142	2.34673	2.17864	2.55511	0.767975	0.260978
	16				2.63155	2.41034	2.26677	2.23857	2.21578	2.40288	2.42058	2.32785	2.05397	1.34579	0.726461
	17					2.31083	2.39849	2.45214	2.42498	2.33817	2.45468	2.41041	1.68948	1.03429
8	1					1.6749	1.71894	1.83063	1.4811	1.25451	1.32935	1.42037	2.38562	2.3974					8																		8
	2				1.44808	1.9524	2.03979	1.84855	1.46877	1.35996	2.81317	2.63764	2.69953	2.54053	2.42016
0.00749203	3			1.85583	3.13182	2.62246	2.46575	1.96829	1.791	1.85961	2.79034	2.56176	2.53396	2.6074	2.50722	2.47861
	4		1.75098	2.02962	3.05745	0.140047	2.55854	1.99572	1.92881	2.12089	2.30556	2.43962	2.43665	2.5011	2.59886	2.53095	2.62738
	5	1.73611	1.91958	1.9715	2.81364	0.0690672	1.37997	2.00297	2.15764	2.32564	2.28261	2.41669	2.30514	2.52979	2.67025	2.82767	2.71042	2.8238
	6	1.74059	1.8808	1.74054	2.95437	0.516054	1.31721	1.60524	2.07172	2.32988	2.31289	2.458	2.52876	2.70284	2.87202	2.90297	2.83671	2.98455
	7	1.61034	1.66355	1.50048	0.451605	2.43577	1.52844	1.63012	1.68952	2.50057	2.62906	0.305722	2.66349	3.09457	3.01797	0.0518808	0.0806996	3.12481
	8	1.68513	1.53706	1.53181	0.70082	2.53053	1.79039	1.42768	1.60068	2.26539	2.96244	3.09549	0.698229	0.666538	0.145146	0.210626	0.0840923	0.0358262
	9	1.70312	1.64747	1.63336		2.35772	1.94811	1.39665	1.5104	1.59901	0.190436	1.3751	1.32202	1.24997	1.04128	0.595303	0.327427	0.0937273
	10	1.7461	1.85694	1.84117	1.77731	2.16771	2.27088	1.08385	1.25545	1.33604	0.257347	1.49482	1.69886	1.59427	1.61622	1.45052	0.916189	0.122694
	11	1.72019	1.75167	1.70816	2.04151	2.1084	1.78432	1.55793	1.35417	1.33165	1.31652	1.58411	1.76886	1.77828	1.75386	1.91292	2.35208	0.0405347
	12	1.703	1.66713	1.59507	1.30858	0.90378	1.41661	1.56668	1.42595	1.43634	1.61565	1.76986	1.9731	2.00615	2.14689	2.35354	1.61021	0.197985
	13	1.84781	1.54999	1.39332	1.0797	0.944863	1.36415	1.64874	1.63472	1.81107	2.00237	1.9937	2.103	2.11593	2.2032	2.55736	1.25313	0.29863
	14		1.93176	1.60586	1.04413	1.17619	1.82789	1.99417	1.93687	2.11026	2.27113	2.1114	2.04857	2.18786	2.14628	2.91643	0.593936
	15			2.42038	2.62028	2.61654	2.39816	2.21816	2.30201	2.39311	2.37073	2.29834	2.24922	2.25939	0.848606	0.707702
	16				2.59815	2.45851	2.40349	2.47024	2.45799	2.49396	2.45448	2.37294	2.26439	2.07245	0.968759
	17					2.42629	2.55624	2.80949	2.68873	2.47576	2.41089	2.38658	1.98919	1.70222
9	1					2.21689	2.00586	1.81852	1.9571	1.51686	1.29391	1.12762	2.30213	2.3484					9																		9
	2				1.62759	1.62098	2.15564	2.18675	1.94776	2.03918	2.90332	0.0416439	2.57241	2.50504	2.43003
0.00727049	3			1.2823	1.97495	2.59459	2.29201	2.02013	1.68603	1.87022	2.48051	2.74597	2.64869	2.62127	2.54036	2.43531
	4		1.85885	2.06064	2.6969	3.12764	2.59487	1.56458	1.72122	1.79258	2.017	2.17028	2.43095	2.57639	2.61282	2.68467	2.79128
	5	1.77909	1.84969	2.11755	2.69433	0.501281	1.29834	1.21795	1.64455	2.54772	2.01137	2.27347	2.24683	2.45404	2.62379	2.6821	2.76603	2.88319
	6	1.77257	1.798	1.74946	0.226809	0.718721	1.25127	0.927448	1.79843	2.68831	2.09961	2.1205	2.54705	2.43979	2.87906	2.85065	2.92848	3.0234
	7	1.57694	1.61928	1.31059	0.517476	0.363862	1.05825	1.93721	2.5006	2.97992	2.45359	1.75495	1.48711	2.87785	2.92069	2.99897	3.04858	3.09642
	8	1.46705	1.45805	1.28321	0.467142	2.89689	3.12221	0.515707	2.96543	3.04253	0.311972	0.880073	0.721034	1.31591	0.192197	3.12642	0.00968988	3.09661
	9	1.50787	1.50152	1.33749		0.0359384	2.76012	0.740778	0.744917	2.09172	2.86625	1.77275	1.26986	1.22679	0.322751	0.265972	0.229225	3.10897
	10	1.82706	1.74537	1.68291	1.57727	1.98778	0.667089	0.892268	1.20086	1.5139	2.9121	1.95617	1.64383	1.36656	1.02823	0.978378	0.610602	3.10769
	11	1.79225	1.75947	1.70153	1.59798	1.81608	1.42164	1.35523	1.26741	1.2477	1.32048	2.03884	1.87426	1.79919	1.67425	1.82525	1.57987	3.11204
	12	1.85006	1.75315	1.56243	1.14272	1.09667	1.36985	1.50781	1.49653	1.19941	0.944285	2.02161	2.00544	1.97948	2.01098	2.4979	1.90719	0.265642
	13	2.0614	1.648	1.5389	0.987783	0.926505	1.76604	1.74393	1.78688	1.69964	2.48635	2.13106	2.17669	2.12065	2.17896	2.57385	0.180933	0.438611
	14		1.90471	1.75052	0.99633	1.21208	2.06753	2.04168	2.09994	2.28457	2.39249	2.24369	2.07741	2.25992	2.35705	0.0880183	0.549863
	15			2.44066	2.50846	2.29861	2.38082	2.28125	2.26599	2.32261	2.30926	2.15897	2.01667	2.34143	0.686726	0.210132
	16				2.56991	2.29027	2.41217	2.37872	2.37176	2.42607	2.2869	2.16624	1.94894	1.65546	0.913783
	17					2.25007	2.3457	2.46926	2.45472	2.33592	2.32901	2.30007	1.75237	1.55599
10	1					2.01136	1.81387	1.88657	1.50308	1.21496	0.755786	0.4655	2.50685	2.45242					10																		10
	2				1.29157	1.6668	1.96317	1.99309	1.91104	1.0504	0.0139523	3.00482	2.79888	2.65989	2.49763
0.750189	3			1.02359	0.908444	2.19402	1.67671	1.8297	1.98809	1.99804	2.8507	3.00568	2.76021	2.77679	2.69552	2.53499
	4		1.69429	2.15784	2.80996	1.17795	1.25949	1.50454	1.98382	2.30972	2.32522	2.63593	2.60967	2.68889	2.74548	2.76912	2.68433
	5	1.81348	1.803	2.07846	0.308096	0.402595	1.0205	1.1711	0.4891	2.23135	2.37394	2.38902	2.41306	2.63949	2.8112	2.85704	2.76495	2.91953
	6	1.72604	1.84307	2.00797	3.0056	0.645697	0.970935	1.07969	2.75519	2.27527	2.45431	2.52349	2.55876	2.8084	2.85681	2.93693	2.89156	3.04188
	7	1.59019	1.66469	1.70109	3.05367	0.0324334	0.396055	1.09042	1.93951	2.77137	2.61252	2.94668	0.204302	2.96643	3.077	3.13705	3.07829	0.0205218
	8	1.56465	1.65816	1.6527	2.65018	2.60567	3.06493	0.771609	1.11046	0.969709	0.497557	1.24433	1.13651	1.37238	0.313952	0.115052	3.13383	3.13882
	9	1.56853	1.61786	1.73166		2.32231	2.36834	0.939795	1.12805	1.45205	2.86837	1.44185	1.46514	1.30855	1.28045	0.203233	0.0200837	3.12952
	10	1.74733	1.68787	1.7303	1.8185	2.10642	2.04159	0.872224	1.28692	1.32542	2.55092	1.95048	1.62096	1.5185	1.57753	1.41397	1.20827	3.10487
	11	1.82757	1.77304	1.76814	1.66289	1.64576	1.32355	1.23866	1.29193	1.34473	1.58748	1.82201	1.85323	1.83251	1.78203	1.56094	2.71332	0.0766874
	12	1.97647	1.68116	1.4768	1.18079	0.842495	1.04783	1.48188	1.51556	1.46404	1.75226	1.94955	1.97293	1.98023	2.15409	2.485	0.988429	0.226347
	13	1.97018	1.75077	1.31029	1.01177	0.907542	1.45428	1.72342	1.71131	2.17129	2.27697	2.14632	2.01356	2.12043	2.18548	2.32155	2.58286	0.394505
	14		1.85728	1.37185	0.976446	1.26683	1.84941	1.95505	2.12973	2.31657	2.28659	2.3261	2.12422	2.09997	1.95824	1.47601	0.671168
	15			2.60489	2.51856	2.23215	2.30212	2.28293	2.35699	2.42481	2.44121	2.37247	2.29777	2.13626	1.4393	0.479277
	16				2.52608	2.35218	2.35512	2.39504	2.45859	2.51847	2.43373	2.38351	2.132	1.85535	1.13999
	17					2.41546	2.44444	2.50926	2.53782	2.42581	2.3815	2.23275	1.53022	1.18548
