# Supplementary material for: Stationary Atrial Fibrillation Properties in the Goat Do Not Entail Stable or Recurrent Conduction Patterns
Source: Front Physiol. 2018 Jul 27;9:947. doi: 10.3389/fphys.2018.00947 (PMC6072874; doi:10.3389/fphys.2018.00947)
Supplement: Supplementary file 1 [file Data_Sheet_1.ZIP › Goat_10_Property maps.xlsx]

## Sheet: AFCL
AFCL
Signals of insufficient quality were excluded from the property maps. Signals could be rejected based on noise low amplitude, large artefact or ventricluar farfields that could not be substracted.
		1	2	3	4	5	6	7	8	9	10	11	12	13	14	15	16	17
1	1					0.130895	0.131858	0.131858	0.13282	0.13282	0.13667	0.138595	0.146295	0.152069					1																		1
	2				0.131376	0.131858	0.131858	0.129933	0.131858	0.131858	0.141482	0.146295	0.14052	0.14052	0.14437
0.00808388	3				0.134745	0.141482	0.14052	0.131858	0.135707	0.134745	0.143407	0.143407	0.14052	0.138595	0.138595	0.134745
	4				0.135707	0.139076	0.141482	0.131858	0.146295	0.150144	0.130895	0.13667	0.133782	0.135707	0.134745	0.134745	0.13282
	5				0.153994	0.144851	0.134745	0.12897	0.147257	0.150144	0.135707	0.133782	0.135707	0.134745	0.133782	0.131858	0.131858	0.13282
	6				0.150144	0.135707	0.14052	0.133782	0.128008	0.151107	0.149182	0.135226	0.137632	0.135707	0.133782	0.132339	0.131858	0.130895
	7				0.150144	0.139557	0.135707	0.13667	0.13282	0.135707	0.13667	0.130895	0.13667	0.138595	0.13282	0.13282	0.130895	0.130895
	8				0.150144	0.142445	0.129933	0.130895	0.130895	0.134745	0.135707	0.130895	0.13282	0.131858	0.130895	0.130895	0.130895	0.129933
	9				0.150144	0.139076	0.13282	0.129933	0.12897	0.130895	0.134745	0.13282	0.131858	0.130895	0.130895	0.130895	0.130895	0.129933
	10				0.142445	0.13667	0.133782	0.133782	0.131858	0.130895	0.131858	0.13282	0.129933	0.129933	0.130895	0.130895	0.129933	0.12897
	11				0.143407	0.135707	0.133782	0.13282	0.13282	0.133782	0.13282	0.131858	0.129933	0.130895	0.130895	0.12897	0.129451	0.129933
	12				0.148219	0.142445	0.138595	0.135707	0.134745	0.13282	0.13282	0.131858	0.129933	0.130895	0.129933	0.12897	0.12897	0.12897
	13				0.162656	0.156882	0.14437	0.139557	0.14052	0.135707	0.134745	0.13282	0.130895	0.12897	0.12897	0.12897	0.12897	0.12897
	14				0.162175	0.162656	0.154957	0.13667	0.134745	0.137632	0.135707	0.13282	0.129933	0.129933	0.12897	0.129933	0.129451
	15				0.159769	0.159769	0.157844	0.138595	0.133782	0.132339	0.133782	0.12897	0.129933	0.12897	0.12897	0.131858
	16				0.158807	0.159769	0.159769	0.139557	0.134745	0.13282	0.131858	0.129933	0.129933	0.12897	0.12897
	17					0.159769	0.159769	0.145332	0.13667	0.133782	0.130895	0.129933	0.129933	0.131858
2	1					0.130895	0.131376	0.130414	0.131858	0.13282	0.134745	0.137632	0.145332	0.152069					2																		2
	2				0.131858	0.13282	0.131858	0.129933	0.129933	0.131858	0.138595	0.143407	0.139557	0.139557	0.143407
0.00789122	3				0.135707	0.142445	0.139557	0.130895	0.134745	0.13282	0.141482	0.142445	0.139557	0.138595	0.138595	0.134745
	4				0.138595	0.139557	0.138595	0.131858	0.14437	0.151107	0.130895	0.137632	0.134745	0.135707	0.134745	0.133782	0.131858
	5				0.153032	0.148219	0.13282	0.12897	0.145813	0.149182	0.134745	0.135707	0.137632	0.134745	0.134745	0.13282	0.131858	0.131376
	6				0.153513	0.134745	0.139557	0.131858	0.12897	0.149182	0.150144	0.135707	0.137632	0.135707	0.133782	0.133301	0.131858	0.129933
	7				0.150144	0.14052	0.13282	0.134745	0.13282	0.133782	0.13667	0.130895	0.13667	0.137632	0.133782	0.133782	0.131376	0.12897
	8				0.145332	0.139557	0.129933	0.129933	0.130895	0.131858	0.13667	0.131376	0.13282	0.13282	0.130895	0.130895	0.130895	0.128008
	9				0.147257	0.138595	0.13282	0.129933	0.129933	0.130895	0.13282	0.131858	0.13282	0.130895	0.130895	0.130895	0.130895	0.127045
	10				0.142445	0.135707	0.13282	0.133782	0.13282	0.130895	0.129933	0.131858	0.130895	0.130414	0.130895	0.130895	0.129933	0.128008
	11				0.14437	0.136189	0.134745	0.13282	0.131858	0.13282	0.13282	0.130895	0.129933	0.130895	0.130895	0.129933	0.129451	0.128008
	12				0.148219	0.139557	0.137632	0.135707	0.133782	0.13282	0.133782	0.130895	0.129933	0.129933	0.129933	0.12897	0.12897	0.128008
	13				0.156882	0.153994	0.147257	0.142445	0.141482	0.13667	0.134745	0.13282	0.130895	0.129933	0.12897	0.128008	0.128008	0.128008
	14				0.160731	0.160731	0.154957	0.13667	0.134745	0.13667	0.135226	0.131858	0.12897	0.12897	0.128008	0.128008	0.12897
	15				0.158807	0.158807	0.156882	0.13667	0.133782	0.133782	0.134745	0.12897	0.128008	0.128008	0.12897	0.129933
	16				0.158807	0.158807	0.159288	0.138595	0.134745	0.131858	0.131858	0.12897	0.12897	0.128008	0.128008
	17					0.159769	0.157844	0.141482	0.138595	0.134264	0.131858	0.129451	0.12897	0.130895
3	1					0.13282	0.131858	0.131858	0.131858	0.134745	0.13667	0.138595	0.145332	0.151107					3																		3
	2				0.133782	0.13282	0.13282	0.130414	0.129933	0.130895	0.139557	0.144851	0.141482	0.14052	0.14052
0.00854137	3				0.14052	0.143407	0.138595	0.131858	0.135707	0.13282	0.14437	0.144851	0.14052	0.139557	0.139557	0.13282
	4				0.135707	0.138595	0.138595	0.13282	0.14437	0.149182	0.130895	0.137632	0.135707	0.135707	0.134745	0.13282	0.129933
	5				0.155919	0.149182	0.134745	0.129933	0.145332	0.147257	0.134745	0.13667	0.135707	0.133782	0.13282	0.131858	0.130895	0.130895
	6				0.153994	0.137632	0.141482	0.13282	0.130895	0.147738	0.148219	0.13667	0.138595	0.135707	0.13282	0.131858	0.130895	0.128489
	7				0.151107	0.142445	0.135707	0.13667	0.133782	0.134745	0.135707	0.129933	0.13667	0.137632	0.13282	0.131858	0.12897	0.12897
	8				0.151588	0.14437	0.130895	0.130895	0.130895	0.133782	0.135707	0.129451	0.131858	0.131858	0.129933	0.129933	0.12897	0.126083
	9				0.149182	0.139557	0.131858	0.130895	0.12897	0.130895	0.13282	0.131858	0.130895	0.12897	0.129933	0.12897	0.128008	0.126083
	10				0.14437	0.134745	0.133782	0.133782	0.13282	0.130895	0.130895	0.130895	0.128008	0.12897	0.12897	0.12897	0.128008	0.127045
	11				0.143407	0.135707	0.133782	0.13282	0.13282	0.133782	0.131858	0.129933	0.128008	0.12897	0.12897	0.128008	0.127045	0.127045
	12				0.147257	0.139557	0.13667	0.134745	0.133782	0.131858	0.131858	0.129933	0.128008	0.12897	0.12897	0.127045	0.127045	0.126083
	13				0.160731	0.155919	0.146295	0.141482	0.14052	0.134745	0.13282	0.130895	0.12897	0.128008	0.127045	0.127045	0.127045	0.126564
	14				0.161694	0.160731	0.157363	0.13667	0.13282	0.135707	0.131858	0.12897	0.128008	0.126083	0.127045	0.127045	0.127045
	15				0.158807	0.158807	0.158325	0.135707	0.130895	0.12897	0.129933	0.128008	0.128008	0.128008	0.128008	0.129933
	16				0.158807	0.159769	0.158807	0.138595	0.131858	0.129933	0.128489	0.128008	0.128008	0.127526	0.128008
	17					0.160731	0.158807	0.145332	0.13667	0.13282	0.129933	0.12897	0.128008	0.12897
4	1					0.134745	0.133782	0.133782	0.133782	0.13667	0.139557	0.138595	0.143407	0.150144					4																		4
	2				0.135707	0.134745	0.134745	0.131858	0.13282	0.13282	0.142445	0.143407	0.139557	0.141001	0.143407
0.00831376	3				0.138114	0.14437	0.143407	0.13282	0.135707	0.136189	0.143407	0.143888	0.139557	0.138595	0.138595	0.134745
	4				0.137632	0.143407	0.141482	0.133782	0.14437	0.147257	0.133782	0.137632	0.135707	0.13667	0.137632	0.134745	0.131858
	5				0.154475	0.150144	0.137632	0.130414	0.142445	0.145332	0.14052	0.135707	0.13667	0.135707	0.135707	0.134745	0.13282	0.13282
	6				0.151107	0.13667	0.14052	0.133782	0.130895	0.145813	0.146776	0.138595	0.138595	0.13667	0.134745	0.134745	0.13282	0.129933
	7				0.152069	0.142445	0.13667	0.135707	0.13282	0.133301	0.134745	0.130895	0.137632	0.138595	0.135707	0.134745	0.131858	0.130895
	8				0.149182	0.145332	0.130895	0.130895	0.130895	0.133301	0.135707	0.131858	0.13282	0.131858	0.13282	0.131858	0.13282	0.12897
	9				0.150144	0.142445	0.135707	0.129933	0.129451	0.129933	0.133782	0.13282	0.131858	0.131858	0.130895	0.131858	0.129933	0.12897
	10				0.14437	0.138595	0.135707	0.135707	0.131858	0.130895	0.131858	0.13282	0.12897	0.130895	0.130895	0.129933	0.129933	0.127526
	11				0.145332	0.137632	0.13667	0.135707	0.134745	0.134745	0.13282	0.13282	0.12897	0.130895	0.129933	0.12897	0.128008	0.127045
	12				0.153032	0.142445	0.14052	0.137632	0.135707	0.133782	0.135707	0.131858	0.12897	0.129933	0.12897	0.127045	0.127045	0.126564
	13				0.160731	0.154957	0.148219	0.142445	0.142445	0.135707	0.135707	0.13282	0.129933	0.128008	0.127045	0.127045	0.127045	0.127045
	14				0.162656	0.161694	0.155919	0.137632	0.135707	0.138595	0.134745	0.131376	0.12897	0.126083	0.127045	0.127045	0.128008
	15				0.159769	0.160731	0.160731	0.13667	0.13282	0.13282	0.13282	0.12897	0.128008	0.127045	0.128008	0.129933
	16				0.159769	0.160731	0.160731	0.141482	0.133782	0.131858	0.131858	0.129933	0.128008	0.128008	0.128008
	17					0.160731	0.16025	0.149182	0.139557	0.135707	0.130895	0.12897	0.12897	0.129933
5	1					0.129933	0.130895	0.131858	0.130895	0.13282	0.134745	0.137632	0.14437	0.153032					5																		5
	2				0.129933	0.131858	0.13282	0.130895	0.131858	0.131858	0.143407	0.145332	0.141482	0.142445	0.142445
0.00845669	3				0.135707	0.141963	0.138595	0.130895	0.135707	0.133782	0.142445	0.143407	0.14052	0.141482	0.138595	0.135707
	4				0.137632	0.141001	0.138595	0.130895	0.143407	0.150144	0.130895	0.135707	0.134745	0.135707	0.135707	0.134745	0.133301
	5				0.151107	0.142445	0.134745	0.128008	0.146295	0.147257	0.13282	0.133782	0.134745	0.133782	0.133782	0.133301	0.131858	0.131858
	6				0.150144	0.13667	0.141001	0.130895	0.12897	0.148219	0.147257	0.134745	0.13667	0.134745	0.134745	0.13282	0.131858	0.129933
	7				0.150144	0.14052	0.135707	0.13667	0.13282	0.13282	0.13282	0.12897	0.135707	0.13667	0.13282	0.131858	0.129933	0.12897
	8				0.148219	0.141482	0.130895	0.130895	0.130895	0.131858	0.133782	0.12897	0.130895	0.130895	0.129933	0.129933	0.129933	0.127045
	9				0.145332	0.137632	0.13282	0.130895	0.129933	0.130895	0.13282	0.131858	0.130895	0.12897	0.129933	0.12897	0.129933	0.126083
	10				0.138595	0.135707	0.13282	0.13282	0.131858	0.131858	0.130895	0.131858	0.12897	0.129933	0.12897	0.12897	0.128008	0.126083
	11				0.139557	0.134745	0.133782	0.13282	0.131858	0.13282	0.13282	0.130895	0.127045	0.12897	0.12897	0.128008	0.127045	0.126083
	12				0.143407	0.138595	0.137632	0.134745	0.133301	0.131858	0.13282	0.12897	0.128008	0.128489	0.128008	0.127045	0.126083	0.126083
	13				0.161694	0.158807	0.146776	0.141482	0.14052	0.134745	0.133782	0.13282	0.12897	0.128008	0.127045	0.126083	0.126083	0.126083
	14				0.162656	0.161694	0.156882	0.137632	0.135707	0.138595	0.133782	0.130895	0.127045	0.126083	0.126083	0.126083	0.127045
	15				0.160731	0.160731	0.157844	0.137632	0.13282	0.131858	0.131858	0.127045	0.127045	0.127045	0.128008	0.12897
	16				0.159769	0.159769	0.157844	0.141482	0.133782	0.131858	0.129933	0.12897	0.128008	0.127526	0.127045
	17					0.160731	0.158807	0.145332	0.134745	0.13282	0.129933	0.128008	0.128008	0.12897
6	1					0.130895	0.131858	0.131858	0.131858	0.133782	0.137632	0.138595	0.141482	0.152069					6																		6
	2				0.132339	0.13282	0.13282	0.130895	0.13282	0.131858	0.141963	0.14437	0.14052	0.139557	0.141482
0.00827431	3				0.134745	0.141482	0.142445	0.13282	0.135707	0.134745	0.141482	0.143407	0.139557	0.139557	0.139557	0.133782
	4				0.139076	0.141482	0.142926	0.131376	0.143407	0.151107	0.13282	0.137632	0.13667	0.137632	0.13667	0.134264	0.129933
	5				0.153994	0.147257	0.135707	0.129933	0.14437	0.148219	0.13667	0.13667	0.137632	0.135707	0.134745	0.133782	0.130895	0.130895
	6				0.153032	0.137632	0.143407	0.134745	0.130895	0.150144	0.150144	0.13667	0.139557	0.13667	0.135707	0.133782	0.131858	0.128008
	7				0.153032	0.14437	0.138114	0.137632	0.134745	0.134745	0.135707	0.131858	0.13667	0.138595	0.134745	0.134745	0.13282	0.12897
	8				0.153032	0.146295	0.13282	0.133782	0.13282	0.133782	0.13667	0.131858	0.133782	0.13282	0.131858	0.13282	0.131858	0.127045
	9				0.148219	0.141001	0.133782	0.130895	0.130895	0.131858	0.13282	0.133782	0.131858	0.130895	0.131858	0.130895	0.129933	0.127045
	10				0.141001	0.13667	0.135707	0.135707	0.13282	0.131858	0.131858	0.13282	0.129933	0.129933	0.129933	0.129933	0.128008	0.126083
	11				0.14437	0.135707	0.134745	0.134745	0.134745	0.135226	0.13282	0.131858	0.12897	0.130895	0.129933	0.128008	0.128008	0.126083
	12				0.150144	0.142926	0.139557	0.137632	0.134745	0.133782	0.133782	0.130895	0.12897	0.129933	0.12897	0.127045	0.126083	0.126083
	13				0.155919	0.157363	0.149182	0.14052	0.139557	0.135707	0.13667	0.134745	0.129933	0.128008	0.126083	0.126083	0.12512	0.125602
	14				0.159769	0.159769	0.156882	0.137632	0.134745	0.13667	0.13667	0.13282	0.128008	0.127045	0.126083	0.127045	0.127045
	15				0.159769	0.159288	0.157844	0.137632	0.13282	0.13282	0.131858	0.128008	0.128008	0.127045	0.127526	0.12897
	16				0.157844	0.158807	0.159288	0.137632	0.133782	0.131858	0.130895	0.128008	0.128008	0.126083	0.127045
	17					0.158807	0.158807	0.145332	0.137632	0.133782	0.130895	0.128008	0.128008	0.129933
7	1					0.133782	0.13282	0.13282	0.13282	0.134745	0.139557	0.141963	0.150144	0.157844					7																		7
	2				0.133782	0.134745	0.133782	0.13282	0.13282	0.131858	0.145332	0.146295	0.14052	0.139557	0.147257
	3				0.138595	0.146295	0.142445	0.134745	0.137151	0.13667	0.145332	0.145332	0.141482	0.139557	0.139557	0.135707
	4				0.141482	0.143407	0.142445	0.134264	0.149182	0.153994	0.13282	0.138595	0.137632	0.138595	0.137632	0.134745	0.134745
	5				0.155919	0.148219	0.135707	0.130895	0.149182	0.152069	0.138595	0.135707	0.137632	0.13667	0.13667	0.13667	0.133782	0.133782
	6				0.155919	0.137632	0.14052	0.134745	0.13282	0.153032	0.150144	0.135707	0.137632	0.13667	0.137632	0.135707	0.134745	0.13282
	7				0.150144	0.142445	0.13667	0.13667	0.134745	0.13667	0.13667	0.13282	0.137632	0.138595	0.134745	0.136189	0.134745	0.131858
	8				0.151107	0.14437	0.133782	0.133782	0.134745	0.135707	0.135707	0.13282	0.134745	0.133782	0.133782	0.13282	0.134745	0.130895
	9				0.148219	0.139557	0.13667	0.133782	0.13282	0.133782	0.135707	0.13282	0.133782	0.13282	0.13282	0.13282	0.13282	0.130414
	10				0.14437	0.138595	0.13667	0.13667	0.135707	0.134745	0.134745	0.133782	0.131858	0.13282	0.13282	0.131858	0.131858	0.129933
	11				0.143407	0.138595	0.13667	0.134745	0.135707	0.13667	0.134745	0.13282	0.131858	0.13282	0.13282	0.131858	0.130895	0.130895
	12				0.149182	0.14437	0.14052	0.138595	0.13667	0.134745	0.135707	0.13282	0.131858	0.131858	0.130895	0.130895	0.130895	0.129933
	13				0.158807	0.158807	0.151107	0.14437	0.142445	0.137632	0.13667	0.133782	0.131858	0.130895	0.130895	0.130895	0.130895	0.130895
	14				0.163619	0.162656	0.156882	0.137632	0.135707	0.14052	0.135707	0.13282	0.131858	0.130895	0.130895	0.130895	0.129933
	15				0.161694	0.160731	0.16025	0.139557	0.134745	0.133782	0.134745	0.130895	0.130895	0.130895	0.130895	0.13282
	16				0.160731	0.161694	0.161213	0.142445	0.135707	0.133782	0.131858	0.130895	0.130895	0.130895	0.129933
	17					0.161694	0.162656	0.149182	0.138595	0.135707	0.131858	0.131858	0.130895	0.130895
8	1					0.131858	0.13282	0.13282	0.133782	0.134745	0.13667	0.141482	0.14437	0.149182					8																		8
	2				0.133782	0.133782	0.133782	0.131858	0.131858	0.131858	0.143407	0.146295	0.141482	0.14052	0.142445
0.00839267	3				0.13667	0.141482	0.139557	0.130895	0.136189	0.134745	0.14437	0.145332	0.141482	0.14052	0.138595	0.133782
	4				0.13667	0.14052	0.138595	0.130895	0.145813	0.147257	0.131858	0.137632	0.135707	0.13667	0.135707	0.133782	0.131376
	5				0.153032	0.145332	0.135707	0.12897	0.14437	0.146295	0.13667	0.135707	0.13667	0.134745	0.135707	0.133782	0.131858	0.131858
	6				0.152069	0.134745	0.139557	0.130895	0.129933	0.147257	0.148219	0.135707	0.137632	0.135707	0.135707	0.133301	0.130895	0.128489
	7				0.150144	0.138595	0.13282	0.133782	0.131858	0.133782	0.133782	0.12897	0.137632	0.137632	0.13282	0.131858	0.130895	0.12897
	8				0.145332	0.14052	0.131858	0.131858	0.131858	0.133782	0.134745	0.12897	0.130895	0.130895	0.129933	0.129933	0.129933	0.127045
	9				0.145332	0.138595	0.133782	0.130895	0.130895	0.130895	0.13282	0.130895	0.129933	0.12897	0.12897	0.129933	0.129933	0.127045
	10				0.139557	0.13667	0.134745	0.134745	0.133301	0.131858	0.131858	0.129933	0.12897	0.12897	0.12897	0.128008	0.128008	0.127045
	11				0.141482	0.136189	0.135226	0.133782	0.133782	0.133782	0.133782	0.12897	0.128008	0.12897	0.12897	0.12897	0.128008	0.126083
	12				0.14437	0.140038	0.138595	0.13667	0.134745	0.13282	0.133782	0.130895	0.12897	0.12897	0.128008	0.127045	0.127045	0.127045
	13				0.155919	0.154957	0.146295	0.14052	0.141482	0.13667	0.135707	0.13282	0.129933	0.128008	0.127045	0.127045	0.127045	0.127045
	14				0.162656	0.161694	0.1564	0.134745	0.13282	0.137632	0.135707	0.129933	0.128008	0.127045	0.127045	0.127045	0.127526
	15				0.162656	0.161694	0.159769	0.13667	0.131858	0.130895	0.131858	0.127045	0.127045	0.127045	0.128008	0.129933
	16				0.161694	0.160731	0.161694	0.138595	0.13282	0.129933	0.130895	0.128008	0.128008	0.128008	0.12897
	17					0.160731	0.161213	0.145813	0.135707	0.13282	0.12897	0.128008	0.128008	0.12897
9	1					0.13282	0.133782	0.133782	0.131858	0.13282	0.135707	0.138595	0.14437	0.150144					9																		9
	2				0.130895	0.131376	0.13282	0.130895	0.130895	0.130895	0.14052	0.147257	0.143407	0.142445	0.145332
0.00851199	3				0.134745	0.137632	0.13667	0.130895	0.134745	0.133782	0.142445	0.145332	0.143407	0.141482	0.14052	0.133782
	4				0.135707	0.13667	0.135707	0.129933	0.143407	0.147738	0.130895	0.137632	0.135707	0.137632	0.135707	0.133782	0.130895
	5				0.155919	0.142445	0.129933	0.128008	0.145332	0.145332	0.133782	0.134745	0.13667	0.134745	0.135707	0.13282	0.131858	0.130895
	6				0.153994	0.13667	0.139557	0.131858	0.130895	0.146295	0.146295	0.134745	0.138595	0.13667	0.135707	0.13282	0.130895	0.129933
	7				0.151107	0.141482	0.135707	0.135707	0.134745	0.133782	0.134745	0.130895	0.137632	0.138595	0.134745	0.133782	0.130895	0.128008
	8				0.151107	0.143407	0.130895	0.131858	0.13282	0.133782	0.13667	0.130895	0.131858	0.131858	0.130895	0.130895	0.129933	0.127045
	9				0.148219	0.138595	0.133782	0.130895	0.130895	0.131858	0.134745	0.13282	0.131858	0.129933	0.12897	0.128008	0.12897	0.127045
	10				0.143407	0.13667	0.134745	0.134745	0.13282	0.131858	0.131858	0.131858	0.128008	0.128008	0.12897	0.12897	0.128008	0.126083
	11				0.141482	0.135707	0.134745	0.133782	0.133782	0.134745	0.13282	0.131858	0.128008	0.12897	0.12897	0.128008	0.127045	0.12512
	12				0.146295	0.137632	0.137632	0.13667	0.134745	0.131858	0.133782	0.130414	0.128008	0.12897	0.128008	0.127045	0.126083	0.12512
	13				0.157844	0.155919	0.146295	0.14437	0.14052	0.13667	0.135707	0.134745	0.129933	0.127045	0.127045	0.126083	0.126083	0.12512
	14				0.159769	0.159769	0.159769	0.139557	0.13282	0.138595	0.13667	0.131858	0.127045	0.126083	0.127045	0.127045	0.126083
	15				0.159769	0.159769	0.158807	0.139557	0.130895	0.130895	0.130895	0.126083	0.127045	0.127045	0.127045	0.12897
	16				0.159769	0.159769	0.160731	0.143407	0.134745	0.131858	0.129451	0.127045	0.127045	0.126083	0.127045
	17					0.159769	0.160731	0.147257	0.14052	0.135707	0.129933	0.12897	0.128008	0.128008
10	1					0.13282	0.13282	0.13282	0.134745	0.134745	0.13667	0.139557	0.146295	0.153032					10																		10
	2				0.13282	0.13282	0.134745	0.131858	0.131858	0.131858	0.14052	0.14437	0.14052	0.14052	0.147257
0.00804392	3				0.13667	0.143407	0.139557	0.134745	0.137632	0.13667	0.14052	0.14437	0.141482	0.139557	0.138595	0.134745
	4				0.138595	0.14052	0.137632	0.13282	0.146295	0.150144	0.131858	0.13667	0.13667	0.137632	0.137151	0.134745	0.131858
	5				0.155919	0.146295	0.13282	0.129933	0.14437	0.148219	0.135707	0.134745	0.13667	0.135707	0.134745	0.133782	0.13282	0.13282
	6				0.154957	0.137632	0.142445	0.134745	0.131858	0.148219	0.147257	0.135707	0.137632	0.136189	0.135707	0.133782	0.13282	0.130895
	7				0.150144	0.141001	0.137632	0.13667	0.134745	0.13667	0.13667	0.131858	0.137632	0.137632	0.134745	0.133782	0.13282	0.129933
	8				0.150144	0.142445	0.13282	0.13282	0.133782	0.134745	0.136189	0.131858	0.133301	0.13282	0.131858	0.130895	0.131858	0.12897
	9				0.148219	0.14052	0.135707	0.131858	0.131858	0.13282	0.134264	0.13282	0.13282	0.131858	0.131858	0.130895	0.130895	0.129451
	10				0.141482	0.137632	0.134745	0.135707	0.133782	0.133782	0.13282	0.13282	0.130895	0.130895	0.130895	0.129933	0.130895	0.129933
	11				0.14437	0.137632	0.13667	0.134745	0.134745	0.135707	0.134745	0.13282	0.130895	0.131858	0.130895	0.130895	0.130895	0.129933
	12				0.146295	0.142445	0.141482	0.137632	0.135707	0.134745	0.134745	0.131858	0.130895	0.131858	0.130895	0.130895	0.130895	0.129933
	13				0.159769	0.157844	0.149182	0.143407	0.143407	0.13667	0.136189	0.133782	0.131858	0.130895	0.129933	0.129933	0.129933	0.130414
	14				0.161694	0.161694	0.157844	0.14052	0.13667	0.139557	0.135707	0.13282	0.130895	0.129933	0.129933	0.129933	0.130895
	15				0.161694	0.161694	0.158807	0.141001	0.134745	0.133782	0.134745	0.129933	0.129933	0.12897	0.129933	0.131858
	16				0.161694	0.161694	0.161694	0.141482	0.13667	0.133782	0.13282	0.130895	0.129933	0.12897	0.12897
	17					0.161694	0.162656	0.147257	0.140038	0.136189	0.132339	0.129933	0.12897	0.129933

## Sheet: DISS
MaxDissociation
Signals of insufficient quality were excluded from the property maps. Signals could be rejected based on noise low amplitude, large artefact or ventricluar farfields that could not be substracted.
		1	2	3	4	5	6	7	8	9	10	11	12	13	14	15	16	17
1	1					17.3706	19.2456	18.2054	22.0575	28.9353	31.0568	35.2535	39.4282	36.3046					1																		1
	2				28.2794	33.2345	31.7544	30.5262	28.5497	35.2212	36.6843	39.0164	38.5417	38.1747	38.1106
0.00808388	3				36.2265	37.9837	34.4132	33.819	33.3303	37.6772	38.4209	38.0972	33.0853	32.5868	34.3614	31.5166
	4				40.6045	41.1769	38.9257	37.5868	38.0665	37.8558	39.5033	37.8409	34.9621	30.8944	31.0246	28.4956	21.7802
	5				47.5927	45.2118	41.1552	41.7684	40.5341	36.387	37.0697	38.2915	28.7745	25.8658	23.9844	24.8092	20.5526	13.2225
	6				39.8873	41.1783	40.5482	43.3429	43.3861	47.4927	49.2755	43.4449	34.475	30.2523	28.4232	24.9297	21.849	16.1335
	7				38.3833	39.5509	36.1338	37.8091	42.2797	46.0268	48.0336	40.5286	35.2686	31.6201	29.854	25.4535	24.6586	17.2626
	8				32.7664	37.4079	34.1222	29.8156	28.1703	38.651	40.491	31.5507	25.8363	26.522	24.8908	21.1732	22.3428	16.9502
	9				35.1542	34.8815	30.4554	29.5768	29.6958	37.8158	37.2416	33.0486	17.9079	15.4454	15.5011	17.7445	20.25	15.2359
	10				34.9526	28.356	25.3311	25.5794	29.0066	32.0333	36.3046	31.6887	19.5338	14.5699	15.8753	17.913	18.2739	13.6356
	11				39.6462	30.6219	23.8363	24.1051	24.9688	27.5223	33.7956	32.6674	19.4367	14.7511	17.7913	17.2771	15.6291	10.573
	12				42.523	39.7891	38.5525	34.4966	31.5892	30.7416	31.7751	32.6154	21.452	15.655	16.3922	15.3952	12.4447	9.22294
	13				43.0718	45.6425	45.5035	42.7829	40.1057	37.2466	34.9797	30.5211	20.4615	14.8203	15.4372	12.961	10.1429	8.41379
	14				27.876	34.6319	42.4387	38.0366	33.8921	33.8345	31.8964	28.4327	17.4232	12.6065	14.2052	12.9566	11.7961
	15				16.9921	23.1615	37.2915	35.2116	23.9287	23.6044	24.7111	20.9152	13.4323	10.197	13.0476	13.6031
	16				13.4036	17.2421	33.7738	34.5771	23.6323	19.7416	20.1969	17.1196	11.4292	9.42641	12.9372
	17					12.1516	30.2031	30.7743	19.4341	14.9392	14.6446	11.8993	9.02179	8.05507
2	1					18.0286	19.6725	19.2838	20.7237	28.0625	33.036	35.4673	37.1326	34.6368					2																		2
	2				27.7275	33.4361	32.2829	30.3891	28.0933	35.207	38.6995	39.2204	37.897	34.7717	37.7287
0.00789122	3				34.5586	37.9163	34.2443	33.1503	32.7703	35.7673	40.6872	37.3188	32.6888	32.6446	34.6147	30.4013
	4				39.9932	40.5136	38.5628	36.2168	36.3692	38.1211	39.3624	38.1727	34.0179	30.0788	29.7092	28.5614	22.0065
	5				45.9833	46.9859	41.1929	42.0499	39.4965	36.5524	37.3108	37.6546	28.1533	25.0179	23.4311	24.7827	21.9498	13.8715
	6				38.3414	40.6563	41.552	43.1325	44.2048	47.1175	48.5871	41.9751	33.3638	30.914	28.4111	25.521	22.6492	16.4559
	7				36.4251	38.7581	36.0044	37.3834	40.2473	44.4469	46.917	40.2313	33.2342	30.9032	29.1062	26.0378	25.0998	17.6424
	8				35.7872	39.0275	32.7572	28.1582	25.8901	36.0683	37.9615	29.6998	23.9381	24.8524	24.762	22.9563	23.128	16.9957
	9				36.7249	35.2381	30.3996	27.4163	27	34.1294	32.9465	29.2616	17.1096	15.4323	17.7843	21.0217	21.7554	17.0466
	10				38.2582	30.3108	24.5367	24.5268	27.8174	31.0156	33.8202	28.4106	18.6048	15.963	18.7158	20.2823	19.5754	15.0704
	11				41.8939	31	25.1865	24.3826	25.4966	27.7763	32.1902	31.3877	18.5844	17.1043	19.8377	18.4052	16.5355	12.4745
	12				44.3614	39.5718	38.2227	36.0816	32.9843	32.7522	32.6236	31.7505	21.3067	17.5844	18.4903	15.5594	13.5675	10.7164
	13				42.8424	43.0633	45.7048	44.0818	41.2494	37.6941	34.8529	30.6336	20.2505	16.4264	16.5505	14.0857	11.0998	8.78801
	14				25.0885	30.8721	42.0951	37.1167	33.3032	32.723	31.2551	27.2418	18.9203	13.9379	15.5309	13.9023	12.1293
	15				16.5379	22.0935	38.35	36.2867	23.1429	22.6734	23.3049	21.848	14.3234	10.3957	12.4592	14.0696
	16				13.4304	18.7995	35.1131	36.0303	24.2275	19.7694	20.1626	18.0602	13.1944	10.4637	13.6009
	17					12.9791	31.6751	32.0117	19.6382	15.4337	15.9426	14.1922	10.8323	8.89059
3	1					15.0839	16.9514	17.4327	20.37	27.4356	32.5711	32.9522	36.684	32.5168					3																		3
	2				25.346	32.102	31.0905	29.159	27.4004	34.0571	37.354	36.5688	36.2395	34.9302	36.8257
0.00854137	3				34.0023	37.4635	34.1483	33.1165	31.2723	34.8151	41.2248	37.4107	31.9384	30.1751	32.7432	30.7407
	4				39.1771	41.5477	38.8121	35.4378	34.0279	36.6914	39.8418	38.7991	34.2731	31.1693	30.8281	29.2368	21.9806
	5				46.0985	45.1588	39.292	39.1225	36.2864	36.0841	36.58	38.9434	30.3554	25.7982	25.604	27.1732	23.0258	14.27
	6				39.2756	40.1553	38.4279	39.8808	40.6031	45.2165	46.9953	42.0519	34.9451	32.254	30.1435	27.1094	25.5215	17.8832
	7				37.3663	39.459	35.7928	35.1686	38.6911	43.7991	45.5923	38.9326	34.7573	33.4955	32.1425	29.9913	28.4555	19.5117
	8				34.802	39.1315	35.5222	28.2089	24.8684	35.5902	38.6749	30.9654	26.8596	28.8603	28.0819	25.8715	25.5223	18.3451
	9				36.988	35.5455	32.3341	28.7396	27.6863	33.4172	34.6062	32.321	20.3709	20.8009	20.2206	23.3987	24.1571	18.1843
	10				38.0541	31.5056	28.6622	27.0133	28.3192	30.356	35.3568	31.9413	21.409	19.0064	20.6111	22.134	22.5177	17.5397
	11				39.8109	31.3883	24.6771	25.9286	26.7257	29.2784	34.5602	33.5711	22.8732	18.887	21.1026	21.1862	19.869	14.2735
	12				42.1476	38.3364	38.5831	35.6152	33.6734	32.6872	33.0507	33.7965	24.6773	18.9936	20.1966	18.6793	17.1294	12.9667
	13				39.0458	42.7277	45.601	42.8037	41.9016	38.2472	36.4757	32.4357	23.1368	18.5823	17.9074	17.7137	15.0398	11.1284
	14				23.953	31.1641	42.8296	39.5669	35.989	35.1292	34.2434	28.295	21.0679	16.9646	18.2363	16.8263	15.2558
	15				14.5932	20.2935	36.1436	34.5884	26.2576	25.0474	25.4816	22.5213	16.6377	13.9641	16.4661	16.5748
	16				12.2336	16.3377	32.2282	35.2169	24.9759	21.972	22.2793	18.9108	15.0701	14.408	16.6008
	17					11.3227	28.049	32.3492	21.4014	16.9251	17.097	14.2073	10.806	10.4
4	1					17.0886	19.926	19.9327	21.6027	28.2255	32.6705	33.4863	35.6705	32.6121					4																		4
	2				25.9335	31.7117	31.7198	29.8938	26.8451	34.6228	37.0766	35.7569	35.4872	35.26	35.3822
0.00831376	3				33.7977	35.9581	32.8542	31.49	29.5305	35.4807	37.5186	34.5452	29.5889	29.8101	32.0114	29.5278
	4				38.023	38.4442	35.9724	34.6637	34.8935	35.9227	35.472	35.0598	30.4706	26.0977	27.451	27.9575	21.8497
	5				42.8845	42.6524	37.4989	39.3814	37.5824	36.0974	35.9476	34.9503	27.6299	22.9707	22.3865	25.2506	22.989	14.4537
	6				38.5831	40.3107	38.9471	41.4054	43.1292	46.8941	46.7657	42.0708	35.2009	30.9591	27.6194	25.7388	24.4189	17.5237
	7				37.6699	39.4533	36.0547	37.3804	39.9956	44.5702	45.5135	38.9934	35.0251	31.5708	29.8958	26.8111	27.107	18.6948
	8				34.7209	38.3012	35.3805	30.643	26.6903	37.1391	37.4751	28.2489	25.115	26.4503	25.8126	22.6993	23.7495	17.1462
	9				35.6225	34.7106	31.5822	30.1407	29.3414	34.1473	33.8206	29.4358	17.6557	17.537	18.7848	20.7511	21.6387	16.6253
	10				36.6197	28.7106	25.73	26.2626	29.6174	31.8612	34.8363	28.0288	19.7592	18.4069	19.0652	19.7072	20.0647	15.0192
	11				40.3753	31.7206	25.2283	24.4325	26.0818	28.4459	32.7235	29.7648	19.2294	17.663	20.1616	18.6488	16.5129	12.2345
	12				43.146	40.5141	38.2158	33.5655	32.7039	31.2709	31.5847	30.4912	21.7127	18.1015	17.9527	15.2141	13.4754	10.8827
	13				41.198	43.8222	46.209	42.6381	38.9722	36.6893	34.9122	29.3415	20.2959	16.4774	15.8094	13.9315	11.0725	9.04487
	14				26.748	34.2026	43.3144	38.7717	31.3851	30.5329	29.9376	25.8972	17.8855	14.4213	15.2559	13.5	11.9892
	15				17.4715	21.5526	37.3454	35.9563	23.625	23.323	24.2168	20.8639	14.6466	11.6415	12.4338	12.9608
	16				12.8172	15.9577	32.3152	34.875	25.2085	20.2345	20.7127	17.6477	12.7056	10.79	13.1674
	17					12.1058	28.6701	30.5049	20.5744	16.0679	16.2484	13.4413	10.5935	9.19306
5	1					15.7	18.4432	18.8013	20.3159	28.5487	33.6525	33.723	37.9335	35.8014					5																		5
	2				27.0371	31.709	32.3692	29.9199	27.463	34.4105	39.1142	36.3498	37.0748	36.5664	38.9561
0.00845669	3				34.8243	36.6674	33.1516	32.5721	31.3452	36.1278	40.3761	36.4543	31.806	31.4178	32.6757	29.7461
	4				39.0387	40.6087	38.7579	37.8174	36.3828	37.9623	38.8301	37.0911	34.0336	30.009	30.942	28.6319	22.6053
	5				46.0096	45.9906	42.2444	41.7011	39.162	37.681	38.2705	39.0642	29.4572	24.4989	25.3133	26.8009	23.7087	15.2972
	6				40.0097	41.4706	41.7551	42.3444	43.7657	48.9833	49.493	44.4641	35.3536	31.6333	28.8274	27.5403	25.7333	19.0622
	7				39.7	41.229	36.9591	37.6199	38.8653	45.702	47.4989	40.3599	35.0156	31.5381	29.9804	28.159	26.6439	20.2633
	8				37.1663	39.9675	34.9051	29.816	26.3355	38.411	39.3164	30.3197	25.3254	26.9761	26.0839	24.6253	24.266	18.4526
	9				39.0475	35.2783	30.9978	29.4605	29.0499	35.5939	35.281	31.1111	19.7823	20.5458	21.3902	22.7516	23.2208	17.2845
	10				38.6881	29.935	25.5733	24.1996	27.4901	31.644	35.9365	31.0897	22.2985	19.9512	20.9274	21.8394	21.6034	16.931
	11				40.5183	30.5643	23.4219	24.0067	24.3252	27.7859	33.2075	33.0952	23.2773	19.6191	22.1547	20.6266	19.7521	13.7458
	12				43.3154	40.38	37.6796	34.7905	32.8953	30.5806	31.9648	33.5782	24.9663	19.258	19.8389	18.4229	15.2714	11.5198
	13				41.2634	43.6341	45.5273	44.293	43.3288	39.5078	36.48	32.9956	23.661	18.9053	18.6868	16.1987	13.4563	9.71967
	14				24.0026	30.705	42.3682	37.5321	36.7915	35.8844	34.3356	30.9006	21.5958	16.9333	17.6299	15.9832	13.5149
	15				16.3228	22.2427	36.01	33.6336	25.8172	26.8862	28.0264	24.5527	18.1639	13.2563	14.482	15.47
	16				15.0052	19.5625	32.0151	33.9671	24.2282	21.1722	23.2052	20.0923	15.3122	13.1116	15.584
	17					13.1309	27.2603	30.7074	21.9955	17.0066	17.0607	15.5541	12.0085	10.3404
6	1					16.8344	17.9351	18.789	20.3186	29.3894	35.1202	36.7851	37.5486	34.7947					6																		6
	2				30.6142	34.5947	32.8296	29.8862	27.0154	35.2566	39.9258	39.0937	38.1644	36.2194	36.777
0.00827431	3				39.4467	40.6858	36.5494	34.1846	31.9424	37.0787	40.4424	36.8767	30.8756	30.6813	32.8188	30.5473
	4				42.7981	44.3784	41.2667	38.4154	36.7106	36.7709	39.8363	36.6445	33.0568	28.8451	29.1258	28.5121	20.9501
	5				47.3683	47.0282	41.9621	41.8004	38.6395	37.0499	36.861	38.2059	28.4299	24.1878	25.6539	26.4493	22.2348	14.4095
	6				38.4361	39.9101	39.2783	43.1518	43.7124	49.823	50.3191	41.7432	34.6468	32.0542	30.0674	27.936	24.7	17.4404
	7				38.6182	40.4657	36.0805	37.3693	39.796	45.5022	47.2889	39.568	36.0632	32.325	31.5533	30.154	27.3772	18.6474
	8				36.868	40.3017	36.0814	29.8806	26.2978	38.5455	40.2742	29.37	25.4978	27.0175	27.159	27.0413	26.7629	19.3681
	9				37.6096	36.0577	31.5973	29.7439	29.3378	35.8248	35.5828	32.0925	18.9891	19.3753	21.337	23.9612	24.4542	17.462
	10				37.8946	31.1812	26.9819	26.3084	29.2634	31.9912	37.0595	31.5459	20.6911	18.2657	21.5237	22.309	22.0766	15.6899
	11				39.4374	31.6432	25	25.4673	26.9101	30.0474	34.9222	31.7637	20.5064	19.1703	21.4968	20.4735	18.3851	13.9727
	12				43.3726	38.4494	37.5081	35.8858	34.3401	32.6547	31.9821	31.987	23.46	19.5714	19.8297	17.2706	13.8753	12.0294
	13				40.7662	42.5672	45.6	43.1304	40.222	37.2977	34.3855	30.4911	21.9784	19.1178	17.6821	14.8608	12.8046	9.32285
	14				25.6537	30.9767	40.6625	36.2636	32.7691	32.3661	30.3093	27.4496	19.9785	15.8162	15.5307	14.5754	12.2293
	15				16.6328	22.1532	36.2071	34.0966	22.969	23.0859	25.4239	23.0426	16.4861	12.4068	12.8565	13.6804
	16				12.9504	18.4948	33.1886	33.9606	23.1286	20.5482	21.7152	19.176	13.9531	11.3945	12.5525
	17					13.0709	29.8165	31.2107	19.2123	15.2528	16.6447	14.4839	11.3141	9.62203
7	1					14.9732	17.9867	19.4305	21.8058	30.8814	36.3349	36.8899	39.654	35.9439					7																		7
	2				28.1233	33.9306	33.4378	30.649	29.7583	35.5912	40.9012	39.1153	37.5047	35.4804	38.9294
	3				37.6735	40.8244	34.3917	33.654	33.9661	36.1	42.9136	38.519	31.3939	30.9372	32.2952	29.6091
	4				42.5962	44.0625	39.5023	37.0089	36.4345	39.138	41.4181	39.5688	34.8927	29.9034	29.8591	27.6443	20.4956
	5				48.2864	47.209	41.1682	41.3348	38.8177	39.049	38.9977	40.5798	31.7857	26.1202	26.1119	27.4225	21.0947	12.9558
	6				40.1471	42.232	39.4738	41.4482	42.1937	47.1985	50.2812	44.675	36.1259	33.3614	31.0363	29.067	24.5374	15.1575
	7				39.3116	40.2131	34.8929	33.3462	39.3415	45.7324	47.4593	41.434	35.6652	31.2893	31.6125	29.4432	26.5288	17.9429
	8				35.5379	37.9202	32.7095	27.2376	26.0023	35.767	37.6659	29.1607	23.9506	25.8293	24.4204	23.5642	24.8695	17.7625
	9				38.5181	34.1498	28.5896	27.2506	27.8304	32.5548	33.5578	29.686	17.3689	17.1126	17.4736	19.7423	22.2052	16.705
	10				38.4463	28.7696	22.5616	23.1773	25.9388	29.2608	33.6022	29.2428	18.4415	16.3377	18.348	18.5033	19.564	15.6782
	11				41.8052	31.3701	24.5642	23.0227	23.1617	25.2551	32.18	31.4358	18.8322	16.3863	18.4615	17.7059	16.9024	12.9499
	12				44.4747	41.4286	40.0371	35.8915	32.7968	31.4612	31.4172	32.5698	21.0795	17.0527	17.7848	15.0978	13.564	11.6523
	13				42.7045	43.6005	45.8665	44.5891	41.4699	37.6445	35.5205	31.2472	19.685	15.6157	14.8166	12.9176	11.0784	8.82096
	14				27.2143	33.4357	40.9132	36.9282	34.3129	33.5092	31.7738	26.817	18.375	13.6471	13.8457	12.3509	11.941
	15				17.3952	21.4921	35.5762	33.3528	24.473	23.2449	24.5844	20.7168	14.0632	10.0502	11.5285	12.7758
	16				13.0265	16.6516	32.3325	32.3929	22.9274	19.904	19.1858	15.3195	11.1204	9.45652	11.2096
	17					11.8841	28.7169	29.3922	18.9583	15.2932	14.6956	11.0925	9.12281	7.59211
8	1					16.8176	20.5328	19.3733	23.0885	30.2534	35.1659	34.831	37.0953	32.3708					8																		8
	2				27.5749	33.1991	32.958	31.0998	29.671	35.6505	39.1565	37.0236	36.386	35.2333	36.9138
0.00839267	3				35.465	37.9128	33.9406	34.0372	32.9845	38.0807	41.2746	36.6589	31.5579	33.2459	34.9887	31.5187
	4				38.6315	39.9194	38.7059	38.0154	35.6131	38.4272	40.1878	36.7016	34.009	30.415	29.9029	29.4301	21.7211
	5				45.199	44.0516	40.2099	40.6522	35.4005	37.8384	36.991	37.527	28.9362	24.9933	24.5682	26.6828	22.7996	15.5478
	6				40.253	40.7701	40.375	41.6903	41.9695	45.3515	48.7146	41.4554	33.9386	30.8767	28.5281	26.6049	25.1861	17.823
	7				39.3486	40.0136	35.694	34.8422	37.7385	43.5996	46.1578	40.7192	35.0964	30.6114	29.2352	27.3682	27.635	19.6617
	8				36.9929	38.8375	32.7394	27.3836	24.1864	34.7366	38.3814	30.8596	25.8627	27.3268	26.2117	23.7361	24.8026	19.6943
	9				38.1412	34.7836	28.8742	27.0642	26.1916	32.0887	35.4568	32.9028	19.7689	20.1834	19.7039	21.0814	23.8166	18.2374
	10				37.3387	29.2364	25.3671	25.0247	26.1275	28.9933	34.7578	30.7716	22.3868	18.7002	20.0839	21.2723	21.5729	16.5105
	11				39.8454	30.2609	25.1919	24.1573	24.7079	27.3125	33.1049	31.8268	22.4158	19.3683	21.3597	19.8085	18.7278	13.2089
	12				41.5311	39.6009	38.154	34.8636	31.7573	31.375	32.72	33.8624	24	20.194	19.7676	18.0924	15.2653	11.8737
	13				40.4415	41.5558	46.5891	40.8492	38.4442	36.2789	35.7955	32.1308	23.7216	18.3453	18.0379	15.5966	12.3571	9.94748
	14				24.8451	32.0078	43.7311	36.9841	32.8747	31.625	32.8652	28.6013	21.121	15.6329	16.6046	14.2998	12.5899
	15				15.3227	22.4158	37.6818	35.3601	24.7939	24.875	26.6203	24.6038	15.9555	12.8333	13.8408	14.1849
	16				13.2275	17.1921	32.7824	35.5023	27.0899	22.5217	22.8853	19.4745	13.4286	12.1106	14.7323
	17					12.6099	27.7717	31.5714	21.9752	17.7938	17.9286	14.4594	10.3992	10.6595
9	1					15.1416	18.0958	18.3915	20.2882	29.1457	33.5301	34.8676	36.6551	32.2911					9																		9
	2				26.0595	30.884	30.8013	29.6696	27.9825	34.7462	38.7123	38.171	36.2678	34.6302	36.5221
0.00851199	3				34.6622	35.8959	31.9058	31.8845	32.0177	35.9911	40.6468	38.5372	31.92	32.1655	34.3531	30.8747
	4				40.4279	40.5518	36.713	35.4039	35.4639	37.373	38.875	38.574	34.6923	30.9683	32.2902	29.7077	21.3013
	5				48.6449	46.5195	39.5826	40.9329	37.6362	36.2412	37.1533	38.9956	30.948	26.8434	25.765	26.468	22.2048	14.3159
	6				40.1961	41.839	41.1465	43.2386	44.0881	46.7565	49.287	43.4821	37.5045	34.2886	31.3535	27.1934	25.0756	18.2382
	7				39.7129	41.7829	37.5923	38.2483	41.1867	46.0576	47.6548	41.3559	36.5135	33.9772	32.7143	29.8777	28.6056	20.4528
	8				36.9448	40.5894	35.7445	28.2723	25.0134	36.8619	39.472	29.841	26.7203	28.8915	28.1401	26.5011	26.9122	19.4633
	9				37.1349	35.5591	30.6211	28.9978	27.7456	33.5982	34.5714	32.2319	21.1783	20.1734	21.6581	23.4026	25.8755	19.6444
	10				36.6925	29.129	26.2803	26.6592	27.9044	29.9317	33.9934	31.7729	24.0573	19.5638	22.5372	23.4518	24.4538	18.6973
	11				40.6005	30.7647	24.2112	25.7226	27.435	28.5513	32.2422	33.0087	24.3128	20.5233	23.5106	23.7743	21.7008	16.0926
	12				43.1962	39.2569	37.4817	35.068	33.1767	32.8489	33.4723	34.7809	27.6102	22.6021	22.7046	20.6751	17.8616	14.0355
	13				43.0889	44.2131	44.8803	41.9884	40.2154	37.3764	36.2919	35.2439	28.0554	22.167	20.9559	17.4454	14.501	10.6848
	14				24.8234	32.112	40.0945	36.8724	33.3053	34.0247	34.5301	32.5435	26.0507	20.0583	19.0063	17.3082	14.6968
	15				15.956	22.6503	35.8329	34.7875	25.178	24.4454	27.0521	25.6071	19.7233	15.0759	16.2306	16.6185
	16				13.644	17.0684	31.3662	34.6376	24.3468	20.4211	23.3247	20.8595	16.1239	14.1002	15.7799
	17					12.9184	27.1697	30.8073	20.1636	16.3363	18.1258	16.5784	13.4055	10.7851
10	1					16.1707	18.3548	18.1808	19.6532	27.0179	31.7432	34.5023	35.7197	32.1899					10																		10
	2				28.46	32.942	32.2584	30.0263	28.2264	33.6836	36.3588	36.5233	35.4302	34.0721	35.4964
9.22684	3				37.0831	38.3596	32.8023	32.692	31.0159	34.3416	38.9795	34.9233	29.8472	30.5264	33.2169	31.6778
	4				41.1606	42.4829	38.0113	37.5011	35.2542	35.6604	38.3987	36.0907	31.4167	28.4492	29.2998	29.5661	20.9367
	5				47.8088	47.6156	41.0133	42.8136	39.5592	37.1868	37.2045	36.8263	28.9684	23.9393	24.069	25.4493	21.9584	14.4074
	6				42.11	42.5195	40.341	43.9128	44.7815	48.0618	48.662	41.7929	35.8281	31.0517	29.5973	25.9379	24.4684	18.4382
	7				42.0264	43.2784	36.5011	37.3876	40.6345	47.5701	48.0452	40.7632	36.4013	32.948	30.0089	27.0661	25.9757	18.8636
	8				39.6189	41.1458	37.2282	30.7175	26.5924	37.7108	39.9887	31.886	25.8234	28.7099	27.0326	24.5359	24.0804	18.0386
	9				38.693	36.7834	32.0068	30.3691	29.6192	35.6481	36.2405	33.7108	20.3611	19.8009	19.3595	21.4784	22.5792	18.5991
	10				37.8558	29.0023	25.3401	26.2523	29.8233	31.1528	35.847	31.1253	22.6009	18.4252	19.29	20.9571	21.9075	17.4009
	11				41.5238	30.055	23.2922	23.9023	24.4819	27.2511	33.7738	33.6096	24.1818	19.4532	21.5174	20.8596	20.0406	15.4204
	12				42.7356	40.0592	37.9038	33.328	30.1918	30.781	32.1149	33.895	27.6231	20.3398	20.3441	18.1398	17.5075	13.4459
	13				40.0355	42.3869	45.9809	43.8568	40.8998	37.5714	35.9385	33.4116	25.3883	19.75	18.656	17.0681	14.3758	11.6938
	14				25.1335	31.7688	41.5831	39.2731	35.0388	33.4989	33.0742	29.6748	21.8095	16.9087	17.3588	16.6468	15.3783
	15				16.6192	21.55	36.3291	35.7045	24.4165	24.1314	26.5344	24.4711	17.4754	13.1589	15.1383	16.2527
	16				12.8094	18.979	31.768	34.4192	23.8077	21.5177	22.8428	19.6323	14.3685	12.242	15.4703
	17					12.5455	27.2658	31.0024	20.4499	16.3673	16.3538	14.8882	11.194	9.98268

## Sheet: BT
NumberOfStartingPointsBT
Signals of insufficient quality were excluded from the property maps. Signals could be rejected based on noise low amplitude, large artefact or ventricluar farfields that could not be substracted. Breaktrough can only be identified if a contiguous circle of electrodes enclose the electrode of interest. Therefore electrodes at the border or around a missing electrodes are excluded.
	1	1	2	3	4	5	6	7	8	9	10	11	12	13	14	15	16	17
1	2																		1																		1
	3						14	26	18	24	13	22	10
0.00808388	4						15	6	5	9	12	21	24	35
	5				52	28	19	3	13	15	46	19	26	15	11
	6				11	14	23	30	16	40	27	6	11	9	14	7
	7				26	36	16	20	97	10	17	8	7	9	9	6	6
	8				27	38	6	23	17	12	15	4	5	15	4	9	8
	9				8	15	9	40	28	16	10	15	19	2	3	14	10
	10				18	13	17	69	49	19	17	10	7	4	6	7	7
	11				12	8	19	21	27	9	24	20	2	0	7	8	4
	12				16	12	21	28	7	5	9	23	11	6	51	8	1
	13				10	40	12	2	10	7	11	14	9	3	6	2	1
	14				8	22	9	18	8	5	6	15	13	2	3	3
	15				4	16	14	7	7	7	16	11	3	3	5
	16					16	5	10	10	12	7	28	4	3
	17						5	6	7	3	10	9	2
	1
2	2																		2																		2
	3						8	18	16	33	10	15	19
0.00789122	4						11	3	2	4	15	13	18	38
	5				50	22	17	2	17	21	43	15	26	17	8
	6				15	30	27	20	24	37	26	2	17	14	10	7
	7				15	41	10	18	76	11	18	7	10	8	10	6	9
	8				33	45	7	12	15	12	15	3	3	9	3	6	6
	9				23	25	6	32	17	12	7	20	21	2	5	19	30
	10				26	12	14	81	50	17	9	7	7	2	3	12	10
	11				17	9	17	32	24	8	15	18	6	2	10	11	3
	12				17	10	27	39	4	5	13	12	10	3	24	9	2
	13				6	36	15	6	4	11	10	14	16	6	5	5	9
	14				10	24	18	24	8	8	8	15	9	6	4	4
	15				6	15	23	13	8	9	8	6	9	3	4
	16					23	8	19	13	10	6	27	3	6
	17						6	5	12	5	11	6	2
	1
3	2																		3																		3
	3						11	15	13	18	14	26	20
0.00854137	4						18	6	10	3	8	14	21	25
	5				51	35	11	1	15	11	25	18	35	11	12
	6				8	8	26	20	18	40	18	10	21	11	14	7
	7				24	33	17	15	88	15	20	5	20	10	3	9	8
	8				39	44	5	22	12	12	16	11	5	12	4	8	11
	9				23	15	8	53	23	5	12	29	22	9	6	19	26
	10				16	8	11	88	60	16	18	7	10	3	10	19	9
	11				21	10	22	30	20	5	17	21	5	4	7	8	6
	12				23	9	25	33	10	8	16	20	9	4	35	10	5
	13				9	30	14	4	6	13	23	12	24	7	13	5	8
	14				11	14	18	19	10	11	18	17	8	4	3	5
	15				5	17	15	16	11	13	10	22	10	5	8
	16					11	7	12	6	13	5	31	9	4
	17						5	11	9	8	9	6	6
	1
4	2																		4																		4
	3						14	21	8	24	13	25	9
0.00831376	4						14	2	8	6	9	12	13	37
	5				33	31	11	4	19	30	53	17	30	13	4
	6				12	14	30	22	17	40	24	7	20	14	12	11
	7				22	44	14	18	93	10	13	4	11	11	7	9	8
	8				27	44	6	16	19	13	16	10	10	12	7	10	7
	9				27	13	8	52	18	9	10	17	24	6	10	18	17
	10				11	12	11	87	48	16	18	8	9	6	5	7	13
	11				12	10	23	32	17	7	16	15	11	1	18	9	4
	12				18	10	22	35	5	8	6	17	5	3	33	7	5
	13				5	23	17	6	9	10	19	15	11	6	7	1	9
	14				8	17	16	32	5	8	13	17	6	3	2	1
	15				2	8	21	18	7	9	11	11	6	4	4
	16					10	2	13	18	7	7	26	3	2
	17						5	14	7	5	11	6	2
	1
5	2																		5																		5
	3						9	25	9	24	7	17	7
0.00845669	4						11	4	8	10	10	11	17	37
	5				43	34	10	5	17	25	59	16	29	20	5
	6				7	13	27	33	21	40	23	6	9	9	16	3
	7				36	41	15	20	88	9	17	1	18	9	7	13	1
	8				34	44	8	18	14	15	9	7	9	10	8	5	15
	9				28	18	10	45	18	9	13	19	20	6	8	22	25
	10				17	11	12	93	58	14	21	12	12	5	6	14	13
	11				22	14	11	36	19	5	25	24	6	2	10	13	5
	12				29	9	39	40	4	5	7	28	20	8	29	9	8
	13				9	36	10	4	8	8	19	11	14	10	6	6	7
	14				8	19	25	19	9	8	11	24	8	9	8	9
	15				5	12	21	17	14	16	15	11	8	7	14
	16					16	7	9	10	9	8	37	8	10
	17						7	8	12	7	6	14	6
	1
6	2																		6																		6
	3						5	11	12	27	8	20	13
0.00827431	4						24	6	9	7	7	13	22	27
	5				38	30	7	1	16	21	49	12	36	10	5
	6				7	12	31	31	28	48	26	8	17	10	11	4
	7				18	34	16	24	88	8	18	6	17	11	5	6	7
	8				33	55	13	13	10	6	12	8	9	11	10	5	5
	9				17	21	15	38	27	13	6	33	35	4	5	14	18
	10				19	8	17	87	58	18	25	6	10	5	8	11	11
	11				9	13	19	28	26	10	16	26	7	4	11	9	7
	12				12	8	26	28	8	12	18	19	8	2	28	15	2
	13				2	28	10	10	4	12	17	17	12	8	8	5	5
	14				8	19	14	19	12	11	6	16	7	7	2	7
	15				7	21	23	21	15	14	12	10	9	8	10
	16					18	6	10	11	12	7	22	5	7
	17						4	3	13	10	13	11	5
	1
7	2																		7																		7
	3						6	23	9	27	14	17	14
	4						17	4	7	5	15	13	23	32
	5				55	26	7	5	19	29	44	17	24	16	7
	6				13	17	31	33	19	49	14	9	17	11	15	8
	7				26	40	18	23	106	13	22	8	13	10	5	9	1
	8				32	61	7	13	15	18	15	4	6	12	3	5	2
	9				18	14	6	44	22	13	6	20	17	3	3	14	23
	10				14	10	22	61	44	11	13	3	5	5	4	7	10
	11				21	14	17	18	13	2	20	23	7	1	7	8	4
	12				16	9	19	34	5	2	9	12	8	4	21	5	2
	13				4	32	13	4	3	7	19	11	13	2	5	5	6
	14				8	15	15	18	8	11	14	12	10	1	3	1
	15				9	19	22	6	9	12	14	9	6	0	6
	16					19	3	9	14	8	8	18	3	2
	17						6	11	5	6	5	3	1
	1
8	2																		8																		8
	3						13	25	12	31	7	15	14
0.00839267	4						16	3	9	11	12	6	20	28
	5				57	26	6	3	17	13	55	19	23	5	7
	6				14	15	24	24	18	35	23	6	15	13	7	4
	7				23	38	20	20	94	8	19	4	13	7	8	10	13
	8				36	35	6	13	6	18	12	2	4	15	10	3	5
	9				23	15	9	45	18	17	18	18	21	6	9	14	18
	10				10	7	18	85	52	13	20	15	13	2	5	10	10
	11				12	14	11	19	21	5	13	25	8	7	14	9	7
	12				23	14	30	32	6	3	12	21	12	3	38	12	8
	13				5	23	11	2	8	10	20	12	13	5	8	8	3
	14				4	17	12	25	6	10	9	18	8	8	6	7
	15				4	18	16	16	10	5	11	8	7	4	6
	16					13	5	20	7	15	9	30	4	2
	17						4	6	13	5	13	6	5
	1
9	2																		9																		9
	3						15	15	10	26	8	19	12
0.00851199	4						13	5	5	4	14	9	19	33
	5				44	27	7	3	16	27	50	16	36	16	9
	6				16	18	29	32	14	57	15	8	27	24	16	7
	7				23	38	10	15	91	8	20	8	11	10	8	8	9
	8				35	57	9	6	7	17	14	7	6	14	9	9	13
	9				22	14	9	39	16	10	7	19	21	8	10	19	36
	10				24	11	14	93	52	21	15	13	20	1	5	15	16
	11				20	10	16	23	22	7	15	29	6	2	9	11	12
	12				23	14	40	47	7	1	12	16	7	8	33	13	7
	13				6	31	10	4	6	9	25	19	18	8	9	5	9
	14				14	19	26	25	8	10	12	23	12	6	5	10
	15				9	19	13	16	12	12	15	16	11	8	13
	16					17	3	9	14	12	11	29	9	9
	17						5	5	7	6	17	14	8
	1
10	2																		10																		10
	3						4	22	15	33	13	20	16
12.6142	4						16	3	8	8	13	9	11	36
	5				40	21	11	2	10	29	41	22	22	10	6
	6				20	16	39	35	15	54	12	7	29	8	12	14
	7				18	42	24	16	73	9	23	10	9	16	6	8	12
	8				32	46	8	8	15	13	18	3	8	11	11	3	12
	9				25	11	5	47	26	11	11	17	22	10	10	19	32
	10				20	10	17	84	60	21	21	9	10	4	9	14	9
	11				13	12	17	23	17	9	20	29	9	2	10	6	9
	12				15	7	29	37	8	10	17	17	6	3	36	6	5
	13				8	31	9	7	5	13	17	26	21	3	6	7	9
	14				7	10	10	19	7	11	7	23	13	4	1	8
	15				5	13	21	9	9	15	14	16	9	9	11
	16					9	13	7	7	7	13	29	8	4
	17						7	8	3	9	14	10	5

## Sheet: FI
FractionationIndices
Signals of insufficient quality were excluded from the property maps. Signals could be rejected based on noise low amplitude, large artefacts or ventricluar farfields that could not be substracted. Fractionation index is particularly sensitive to noise. Therefore electrodes with substantial noise are more strictly excluded.
		1	2	3	4	5	6	7	8	9	10	11	12	13	14	15	16	17
1	1					2.94737	3.25885	3.16518	2.97345	3.18304	3.54545	3.96544	3.67294	3.29736					1																		1
	2				2.97118	3.11504	3.26549	2.44323	2.50993	3.45796	3.73963	3.05164	3.23843	3.13103	3.60235
0.00808388	3				3.54933	3.87209	1.66438	0.810155	0.81573	2.81038	2.65349	2.53241	2.18664	1.01598	2.78182	3.09091
	4				3.57528	3.21542	2.93243	1.74725	2.63658	2.38702	0.632385	2.5	1.64955	1.77079	1.90848	2.67841	2.33407
	5				4.1122	4.29412	2.56098	1.95671	2.14824	1.6899	2.34831	1.69955	1.37813	0.801339	0.737778	1.24561	1.6864	1.6674
	6				7.44365	1.98646	2.05046	2.86726	2.9718	2.46829	1.5677	3.59775	2.19091	2.02703	1.54343	1.11648	1.23195	1.0919
	7				3.48333	3.47454	2.77778	2.69091	2.97797	3.80089	4.47758	1.24009	2.95034	1.9016	2.01549	1.46903	1.24508	0.997812
	8				3.18735	4.67599	2.37333	2.34667	2.11572	2.46085	3.17265	0.814978	1.81236	0.731278	0.591703	0.800439	1.10262	0.725108
	9				2.2747	5.51025	1.47768	2.47149	3.11379	1.83553	3.41834	2.74393	1.4693	0.362445	0.318083	0.401747	1.06739	0.660173
	10				3.74171	2.61905	2.19016	2.27964	2.3385	1.89778	2.22958	1.84106	0.604348	0.641921	0.439825	0.7	0.554348	0.240781
	11				4.04009	4.86105	1.74439	1.03579	0.412946	1.27232	2.08667	2.37004	1.32314	1.10262	0.945652	0.993506	0.59436	0.204793
	12				4.15012	4.08768	3.7032	2.58876	1.25508	0.32294	1.70156	2.84396	1.29913	0.884279	0.971678	0.563715	0.34632	0.25974
	13				4.15641	3.9275	3.78923	3.43187	3.74483	3.25113	2.7833	2.74058	1.2989	0.603896	0.331169	0.292208	0.385281	0.512931
	14				3.18997	3.72585	3.33333	2.53089	1.86517	3.22449	2.99775	2.25166	0.905702	0.371739	0.352052	0.524946	1.11931
	15				5.40263	1.91406	2.77136	2.27907	1.098	1.50549	2.06667	1.17391	0.864629	0.582251	0.848485	1.89693
	16				0.518229	0.95	2.17995	2.58411	0.461883	0.821826	0.997788	0.884783	0.472767	0.484848	0.941558
	17					1.6516	3.35417	3.19175	0.725	1.20946	0.9117	0.536105	0.35512	1.32159
2	1					2.94286	3.11648	3.00218	3.10307	3.42188	3.71973	4.26185	3.8186	3.26651					2																		2
	2				2.99121	3.09251	3.23026	2.62174	2.57701	3.60131	3.91514	3.07657	3.20824	3.24201	3.55862
0.00789122	3				3.54279	3.99535	1.85747	0.832244	0.81982	2.60403	2.58676	2.51606	2.0984	0.968109	2.73719	3.0426
	4				3.71005	3.34615	2.79148	1.71903	2.61682	2.38005	0.709607	2.575	1.87919	1.77928	2.38031	2.63596	2.1757
	5				4.15072	4.19529	2.34368	1.70282	2.06353	1.7619	2.28829	1.83521	1.46453	0.926339	0.933333	1.5122	1.50437	1.64488
	6				7.31477	2.01552	2.21719	2.94481	2.8671	2.56835	1.31265	3.69683	2.45995	1.90271	1.49111	1.34216	1.15468	1.06022
	7				3.3285	3.3318	2.72949	2.66143	2.77024	3.56858	4.33184	1.02203	2.77703	1.83108	2.0531	1.75333	1.39262	1.05139
	8				3.04019	4.41972	2.16556	2.17802	2.06374	2.33921	3.23356	0.726269	1.52212	0.832599	0.694323	1.20524	1.31887	0.717949
	9				2.4689	5.3356	1.59375	2.40308	2.92088	1.82237	3.29621	2.43902	1.36761	0.305677	0.501089	0.483731	1.21429	0.67019
	10				3.63146	2.62613	2.12695	2.20089	2.23831	1.85333	1.98684	1.66446	0.641921	0.688453	0.67462	1.01509	0.540948	0.336887
	11				3.88208	4.75057	1.73034	1.05817	0.422819	1.52573	2.22148	2.32379	0.865801	1.09348	1.14286	0.857759	0.578495	0.251064
	12				4.08675	4.02778	3.62645	2.51927	1.36099	0.337054	2.09354	2.56018	1.00432	1.04113	1.01296	0.440605	0.385439	0.307036
	13				3.96059	3.84466	3.90238	3.5257	3.8776	3.65982	2.99548	2.49007	1.26797	0.664502	0.354839	0.368308	0.441614	0.524625
	14				3.03385	3.87206	3.3	2.60641	1.64253	3.0473	2.9526	2.04396	0.920259	0.421842	0.45629	0.592357	1.10776
	15				5.08312	1.93247	2.85	2.16972	0.941964	1.44072	1.96413	1.16916	0.87234	0.557447	0.856223	1.67174
	16				0.818898	1.11719	2.47301	2.58508	0.509009	0.924612	1.05568	0.877419	0.514957	0.525641	0.890558
	17					1.72513	3.27411	3.24709	0.708046	1.24944	0.986755	0.570194	0.453763	1.31659
3	1					2.63436	2.93377	2.85872	3.0837	3.21778	3.60045	4.02278	3.80896	3.34135					3																		3
	2				2.70089	2.75831	2.90287	2.4902	2.39825	3.3978	3.74483	2.91608	3.34884	3.17907	3.56651
0.00854137	3				3.52668	3.7968	1.78876	0.773626	0.910714	2.49443	2.51147	2.34339	2.04795	0.9447	2.64865	2.8976
	4				3.67265	3.20909	2.65101	1.6	2.60698	2.30626	0.87033	2.52425	1.74041	1.81038	2.12723	2.57675	2.11398
	5				4.11084	4.11848	2.3208	1.6477	1.9261	1.60748	2.10222	1.96154	1.47836	1.03812	0.90708	1.47186	1.43133	1.62419
	6				7.09512	2.06393	1.93822	2.7638	2.71053	2.36706	1.20375	3.80135	2.34325	1.96599	1.66887	1.28446	1.30043	1.05945
	7				3.34901	3.363	2.66216	2.52392	2.65556	3.58259	4.3018	1.29565	2.8382	1.89773	2.21604	1.82751	1.64619	1.21444
	8				3.14914	4.61502	2.21333	2.20889	1.87281	2.20935	3.213	0.833693	1.6557	1.06987	0.721983	1.40685	1.43949	0.85447
	9				2.43405	5.74545	1.68374	2.32166	2.75381	1.80795	3.49558	2.70306	1.47939	0.531049	0.631692	0.750533	1.24841	0.774327
	10				3.89176	2.70022	2.25111	2.24222	2.11384	1.82637	2.38106	1.86087	0.743041	0.840085	0.788462	1.04468	0.644491	0.441423
	11				3.97636	4.54853	1.88117	1.21875	0.597345	1.55679	2.39168	2.5431	1.13953	1.39019	1.21581	1.06067	0.704782	0.296451
	12				4.07381	4.14019	3.60137	2.38702	1.55481	0.418502	2.2467	2.829	1.38641	1.10851	1.11628	0.575949	0.446764	0.310417
	13				4.02799	4.01733	4.05463	3.71729	3.87414	3.47416	2.86062	2.7451	1.53846	0.797468	0.52	0.425263	0.465409	0.648421
	14				3.09138	3.92188	3.47901	2.80272	1.92967	3.2294	2.84649	2.18004	1.03822	0.479167	0.506329	0.716102	1.26004
	15				4.43717	1.74286	2.8539	2.44519	1.25325	1.69828	2.04989	1.26809	0.911017	0.697674	0.942797	1.79176
	16				0.448819	0.798429	2.27949	2.84932	0.800439	1.15269	1.15352	1.1104	0.677282	0.59408	1.02123
	17					1.76	3.31701	3.39667	1.03401	1.47357	1.09052	0.611111	0.481876	1.4
4	1					2.94318	3.18386	3.14798	3.28125	3.38041	3.73502	4.06393	3.68879	3.16355					4																		4
	2				3.00917	3.08238	3.32802	2.51549	2.48894	3.60045	3.75174	2.93287	2.79487	3.08747	3.34096
0.00831376	3				3.52644	3.81628	1.5625	0.749446	0.857788	2.61224	2.61628	2.28306	1.79446	0.812357	2.55353	2.80624
	4				3.66437	3.2814	2.63134	1.42825	2.7037	2.26932	0.689038	2.47816	1.44344	1.46485	1.87016	2.4698	2.09804
	5				4.20147	4.21429	2.1542	1.59867	1.88863	1.57309	2.38724	1.77652	1.47248	0.671171	0.831461	1.23282	1.42982	1.61233
	6				7.25783	1.85714	2.06437	2.86486	2.85523	2.20706	1.23202	3.72603	2.25115	1.76364	1.36937	1.21205	1.11184	0.969828
	7				3.28117	3.06075	2.73182	2.79043	2.88027	3.70601	4.07606	1.30243	2.81507	2.00228	1.96452	1.6	1.2963	1.00649
	8				2.78883	4.39529	2.16372	2.12417	2.11062	2.48344	3.00679	0.803965	1.43142	0.874172	0.810458	1.18083	1.14379	0.660215
	9				2.39216	5.32	1.50913	2.31429	2.56236	1.72527	3.20404	2.36504	1.30921	0.345652	0.567391	0.601732	1.02366	0.614561
	10				3.58216	2.46759	2.02059	2.15525	2.14094	1.68282	2.13938	1.63415	0.659436	0.694805	0.782609	0.796095	0.385776	0.385928
	11				3.84086	4.25404	1.70091	0.967963	0.397727	1.32883	2.16814	2.17363	0.729437	1.20435	1.03448	0.743041	0.478541	0.253731
	12				4.12129	4.03991	3.34571	2.21379	1.27335	0.354402	1.83296	2.45833	1.08423	1.11447	0.924731	0.374732	0.357602	0.279318
	13				4.13198	4.10864	4.00713	3.42227	3.62269	3.33107	2.83333	2.5255	1.26566	0.696774	0.376874	0.271949	0.341151	0.564103
	14				3.05512	3.8961	3.34901	2.65297	1.73423	3.02721	2.82183	2.03282	0.904968	0.397872	0.432836	0.536481	0.974138
	15				4.88372	1.77632	2.90206	2.22299	1.03571	1.5177	1.88274	1.12095	0.803879	0.557235	0.850325	1.57516
	16				0.438642	0.880952	2.40827	2.66038	0.544843	1.06858	1.05044	0.97593	0.502165	0.493506	0.859002
	17					1.7328	3.32468	3.31618	0.755814	1.38009	0.96044	0.706522	0.391304	1.36226
5	1					2.77174	3.0262	3.08297	3.1	3.40929	3.76233	4.07191	3.75459	3.36038					5																		5
	2				2.89083	3.04376	3.12527	2.5368	2.37174	3.70087	3.92237	2.92723	3.26636	3.14452	3.65358
0.00845669	3				3.56757	3.87244	1.78054	0.812227	0.928731	2.58969	2.71101	2.3466	1.95381	0.957746	2.69144	3.049
	4				3.83371	3.49428	2.83484	1.53043	2.72854	2.49528	0.633987	2.47836	1.62864	1.64865	2.04911	2.64967	2.14004
	5				4.40144	4.1452	2.63556	1.73333	2.13146	1.72381	2.35698	1.74115	1.32432	0.769401	0.831111	1.35011	1.48913	1.61822
	6				7.33738	1.97059	2.19908	3.06181	3.00868	2.45714	1.58451	3.59193	2.23649	1.85556	1.68363	1.3573	1.25161	1.13734
	7				3.59024	3.40421	2.73636	2.73077	2.95143	3.63576	4.34216	1.21121	2.78174	1.97085	2.05447	1.72331	1.34968	1.05945
	8				3.28193	4.41531	2.35099	2.18182	2.00439	2.41538	3.18363	0.682505	1.51193	0.98913	0.701075	1.31049	1.1617	0.837895
	9				2.54632	5.52941	1.41907	2.44737	2.92191	1.84061	3.40487	2.56863	1.42888	0.415778	0.603412	0.556263	1.22081	0.725941
	10				3.89679	2.6861	2.17778	2.1929	2.31347	1.84396	2.26258	1.75711	0.73617	0.734607	0.713675	0.978587	0.64135	0.439331
	11				3.89041	4.63883	1.83036	1.09354	0.564159	1.43267	2.47241	2.4697	1.03782	1.32766	1.18008	1.05696	0.672917	0.291667
	12				4	4.20513	3.48513	2.45721	1.29844	0.370861	1.97797	2.69807	1.31579	1.15139	1.02929	0.685417	0.45929	0.347193
	13				4.18926	3.95739	3.91211	3.71163	3.77854	3.40716	2.94	2.81659	1.52665	0.730526	0.549061	0.502092	0.489583	0.648536
	14				2.93421	3.80418	3.45522	2.74771	1.96861	3.3356	3.23333	2.26782	1.07368	0.5625	0.482328	0.67437	1.23567
	15				4.95276	1.86016	2.798	2.19585	1.03304	1.5186	2.36264	1.36709	0.922269	0.672269	0.961945	1.78755
	16				0.692708	0.992188	2.33249	2.49061	0.55481	1.00221	1.06769	1.07511	0.599156	0.566316	0.97479
	17					1.74869	3.28093	3.23501	0.717149	1.20879	1.01952	0.632696	0.457806	1.3383
6	1					3.02649	3.24161	3.03077	3.08628	3.36726	3.93424	4.31222	3.98383	3.40573					6																		6
	2				3.06874	3.3029	3.1615	2.68271	2.35242	3.55263	3.88399	2.93911	3.2662	3.18707	3.66667
0.00827431	3				3.83673	4.13532	1.55172	0.705495	0.745011	2.5573	2.63825	2.26512	1.95622	0.963048	2.76606	3.07033
	4				3.91183	3.56881	2.78621	1.53846	2.71296	2.24105	0.420354	2.70413	1.76364	1.83599	2.18652	2.66593	2.14751
	5				4.17073	4.26761	2.60268	1.70716	2.03953	1.52969	2.22779	1.819	1.57241	0.975113	0.977528	1.50661	1.4587	1.56466
	6				7.01205	2.03687	1.98821	3.04688	2.94248	2.5	1.34515	3.65991	2.45183	2.09255	1.73258	1.52097	1.15435	0.921444
	7				3.39409	3.28605	2.58851	2.48394	2.89686	3.87668	4.36343	0.971491	2.68623	1.88864	2.21556	1.9933	1.55044	0.952991
	8				3.01711	4.51781	2.26471	2.06081	2.01333	2.54324	3.14607	0.669604	1.4823	1.03501	0.860566	1.52826	1.45043	0.714894
	9				2.28193	5.54273	1.34615	2.56347	2.78	1.76275	3.51876	2.37004	1.46405	0.362256	0.702174	0.717672	1.1855	0.670886
	10				3.62295	2.47248	2.06109	2.23356	2.33482	1.92715	2.35903	1.67467	0.591793	0.738661	0.836207	1.04077	0.404255	0.377637
	11				3.90307	4.22955	1.69388	1.2009	0.606742	1.56885	2.44	2.22319	0.727468	1.26293	1.15914	0.745223	0.56383	0.306723
	12				3.92788	3.90588	3.58701	2.15297	1.40766	0.441704	2.1875	2.54565	1.10799	1.2987	0.939655	0.40592	0.395349	0.285714
	13				4.01244	3.95533	3.97831	3.51716	3.69565	3.19318	2.87755	2.64062	1.46336	0.768737	0.402105	0.311579	0.39916	0.526205
	14				3.03618	3.99483	3.3995	2.66591	1.82287	3.04018	2.76524	2.07018	0.974249	0.448718	0.40592	0.611465	1.0552
	15				5.375	1.98701	2.97475	2.17471	0.911308	1.4978	2.01739	1.20851	0.867804	0.580508	0.867238	1.53478
	16				0.736979	0.953003	2.5969	2.64352	0.496674	1.01096	1.04555	0.845494	0.513859	0.50211	0.837259
	17					1.74016	3.4201	3.22276	0.730594	1.37251	1.03947	0.663812	0.467949	1.375
7	1					2.76786	3.102	3.09051	3.31027	3.51454	3.96019	4.46838	3.89336	3.49268					7																		7
	2				2.82511	2.91723	3.12	2.68874	2.61419	3.75604	4.18588	2.80706	3.0907	2.96767	3.71765
	3				3.53741	3.99297	1.55991	0.752232	0.801354	2.60682	2.7243	2.40995	1.94639	0.660465	2.8627	3.07727
	4				3.83138	3.3125	2.79128	1.4877	2.76699	2.30024	0.670354	2.84149	1.72831	1.70805	2.11364	2.7226	2.24229
	5				4.42716	4.34442	2.56951	1.62335	2.06235	1.56618	2.52083	1.98652	1.67972	1.01814	0.954338	1.34382	1.50661	1.5894
	6				7.54115	2.05405	2.28474	3.14865	2.8536	2.93548	1.19231	3.79091	2.66133	2.07727	1.67347	1.39732	1.1652	0.969365
	7				3.33575	3.46838	2.6287	2.2164	2.55134	3.55329	4.42534	1.0179	2.86199	1.87472	2.2049	1.89532	1.36726	0.938462
	8				2.94866	4.3662	2.17793	2.04751	1.85779	2.28959	3.09193	0.662946	1.48989	0.957871	0.893805	1.39381	1.37168	0.529412
	9				2.44819	5.58756	1.49887	2.41986	2.61384	1.5481	3.4195	2.21604	1.28889	0.417219	0.4163	0.592511	1.15721	0.650759
	10				3.70167	2.54839	2.10959	2.09318	2.05669	1.54875	2.04494	1.43709	0.589404	0.874172	0.689427	0.947253	0.362256	0.235421
	11				3.85511	4.31724	1.6055	1	0.346241	1.21412	2.25513	2.22566	0.781457	1.19426	1.12747	0.653595	0.548807	0.180828
	12				4.04578	4.21308	3.61253	2.42263	1.3379	0.292237	1.74603	2.58537	0.986755	1.0022	0.863043	0.345652	0.360087	0.226782
	13				4.0303	3.90704	4.08495	3.65083	3.70602	3.37385	2.77955	2.49438	1.26211	0.58952	0.303493	0.227766	0.363834	0.526201
	14				3.04762	3.72178	3.35236	2.57407	1.82766	3.04587	2.76697	1.98884	0.842105	0.315904	0.371739	0.510965	1.02183
	15				5.27321	1.96032	2.88114	2.15421	0.957207	1.49663	1.90667	1.05229	0.753813	0.556769	0.837719	1.52527
	16				0.567639	0.797872	2.31948	2.47857	0.376417	0.959821	0.957965	0.794311	0.389497	0.467391	0.799127
	17					1.59677	3.40476	3.30637	0.782407	1.21591	0.906667	0.502203	0.335526	1.2807
8	1					2.95614	3.23581	3.33556	3.37168	3.49327	3.73636	4.40509	3.82326	3.32697					8																		8
	2				3.05593	3.22345	3.31567	2.75922	2.65577	3.71868	4.04907	2.80189	3.24884	3.097	3.6993
0.00839267	3				3.5553	3.88303	1.65982	0.737418	0.909091	2.82063	2.69249	2.42757	1.99769	0.951276	2.60811	3.10769
	4				3.71461	3.3341	2.83032	1.67253	2.73427	2.21127	0.5131	2.73121	1.73874	1.81859	2.07223	2.61135	2.12418
	5				4.40049	4.21596	2.46501	1.73478	1.97222	1.5082	2.45928	1.70946	1.43736	0.861915	0.979866	1.39427	1.46623	1.64348
	6				7.63133	2.01786	2.10682	2.80973	2.86928	2.68409	1.29481	3.58929	2.28182	1.86099	1.67191	1.44592	1.17749	0.995736
	7				3.66346	3.29478	2.47672	2.46	2.74945	3.80752	4.53556	1.12743	2.6009	1.71591	2.01538	1.90414	1.65011	1.00642
	8				3.15802	4.1167	2.0735	1.88248	1.9386	2.37277	3.30155	0.671706	1.49237	1.01948	0.742981	1.22103	1.38544	0.726115
	9				2.35294	5.17084	1.37753	2.20575	2.27093	1.64302	3.50998	2.66739	1.57235	0.415778	0.551502	0.531049	1.2452	0.686975
	10				3.62181	2.50455	2.16216	2.23146	1.98881	1.59465	2.20222	1.77586	0.647436	0.783726	0.716129	0.882979	0.486258	0.363445
	11				4.06323	4.35698	1.74944	1.06966	0.462921	1.39955	2.3058	2.45238	1.01066	1.22912	1.11563	0.82766	0.537975	0.236287
	12				4.13397	3.95128	3.36322	2.15682	1.27865	0.40625	2.15333	2.77511	1.27039	0.982942	0.982942	0.453782	0.402105	0.284211
	13				3.86585	3.94045	3.81473	3.64269	3.85581	3.50567	3.11685	2.75166	1.45824	0.720339	0.389474	0.310924	0.384454	0.546218
	14				3.0315	3.74677	3.25428	2.69091	1.78523	3.13864	3.0427	2.122	1.00849	0.345992	0.372385	0.574423	1.02748
	15				4.85067	1.75	2.85354	2.40138	1.09211	1.51974	2.13024	1.17797	0.834746	0.554852	0.81104	1.65161
	16				0.632275	0.96063	2.40933	2.58065	0.605263	1.07174	1.16017	0.989362	0.533049	0.497872	0.931478
	17					1.6911	3.51181	3.25666	0.82167	1.33038	1.02165	0.555556	0.397028	1.25268
9	1					2.76991	3.07572	3.04698	3.35033	3.3819	3.77728	4.26484	3.69213	3.26995					9																		9
	2				2.89427	2.94748	2.94541	2.51204	2.40919	3.62582	4.11833	2.83138	3.03081	2.76744	3.48485
0.00851199	3				3.46444	3.92534	1.52915	0.862745	0.995565	2.6637	2.76835	2.59302	1.94118	0.708625	2.59453	3.08949
	4				3.53153	3.27027	2.63901	1.60917	2.74359	2.14452	0.530702	2.74032	1.59955	1.76644	2	2.72308	2.13319
	5				4.2971	4.25057	2.40217	1.70779	1.97887	1.55972	2.2	1.80444	1.32353	0.803132	0.742794	1.40839	1.50763	1.42266
	6				7.13725	2.04082	2.12586	3.04338	2.94714	2.6643	1.32176	3.78795	2.55227	1.88591	1.7047	1.36923	1.14903	0.98927
	7				3.3134	3.27252	2.83108	2.55705	2.78444	3.81818	4.37416	1.08297	2.89013	1.63326	2.09451	1.76856	1.42241	1.03145
	8				2.89209	4.24312	2.27313	2.10268	1.9375	2.47439	3.21253	0.701525	1.49339	1.15618	0.818966	1.2419	1.4454	0.853249
	9				2.3494	5.48409	1.52915	2.29322	2.59292	1.72185	3.46205	2.42013	1.52174	0.379015	0.632479	0.603854	1.37975	0.813808
	10				3.74178	2.60181	2.213	2.33408	2.18889	1.84141	2.29736	1.66376	0.605096	0.812766	0.789809	1.14133	0.665966	0.561587
	11				3.74827	4.33937	1.85169	1.25727	0.697309	1.48661	2.26444	2.43137	0.810638	1.16102	1.17373	0.978903	0.646444	0.378151
	12				3.974	4.05046	3.45205	2.35374	1.39821	0.486667	2.20399	2.61605	1.13347	1.19787	1.09916	0.580713	0.473795	0.39666
	13				4.00988	3.84746	3.80047	3.3912	3.61678	3.58957	3.06109	2.82262	1.72495	0.810021	0.57563	0.478992	0.465696	0.627083
	14				2.95065	3.75064	3.20896	2.69704	1.9115	2.97085	3.1069	2.45652	1.19239	0.566667	0.502101	0.704403	1.18316
	15				4.52196	1.76166	2.76962	2.31178	1.0989	1.64192	2.07375	1.37214	0.916143	0.721519	0.995807	1.70043
	16				0.509138	0.786842	2.17403	2.49412	0.452703	0.95614	1.12258	0.955975	0.605042	0.611691	0.968553
	17					1.75263	3.2141	3.12439	0.873272	1.40181	1.15835	0.720339	0.451681	1.42797
10	1					2.91353	2.96674	3	3.18919	3.24832	3.58784	4.17123	3.53444	3.00962					10																		10
	2				3.05556	3.16295	3.29176	2.63377	2.47033	3.29646	3.82407	2.72791	2.88372	2.77674	3.39857
1.20733	3				3.69438	4.05336	1.57727	0.698661	0.870159	2.51357	2.53409	2.22093	1.8125	0.751724	2.47489	2.92905
	4				3.7133	3.13667	2.88514	1.62138	2.6152	2.33255	0.453744	2.72789	1.6036	1.69977	1.89485	2.54405	2.00655
	5				4.40196	4.53774	2.44346	1.76316	2	1.65248	2.24318	1.79287	1.307	0.793258	0.7951	1.24009	1.39387	1.50545
	6				7.36675	1.85126	2.29724	3.08501	3.16115	2.75534	1.39906	3.82851	2.46606	2.06742	1.55257	1.26164	1.11111	0.865801
	7				3.51202	3.47332	2.73333	2.52982	2.77354	4.0724	4.54525	1.32675	2.82287	1.67195	2.21508	1.5793	1.37086	1.0368
	8				3.27913	4.35417	2.2528	2.11659	1.92205	2.52018	3.56236	0.791667	1.883	0.918681	0.76087	1.14161	1.19783	0.929336
	9				2.28058	5.31797	1.3544	2.5123	2.84187	1.73719	3.62361	2.80353	1.5186	0.463895	0.46841	0.400433	1.2603	0.842217
	10				3.63953	2.3945	2.03401	2.21818	2.17673	1.91011	2.20399	1.81099	0.650759	0.78308	0.517316	0.948498	0.587097	0.445629
	11				4.00952	3.98165	1.5	1.04318	0.395928	1.21041	2.20588	2.60088	1.25758	1.20044	1.08261	1.22678	0.651709	0.391949
	12				4.1226	3.8673	3.42254	2.12844	1.21005	0.340858	1.89189	2.79431	1.3469	0.980519	1.11398	0.673118	0.441113	0.382166
	13				4.19543	3.94472	3.92105	3.53286	3.78089	3.46544	2.97039	2.83669	1.52928	0.762931	0.487179	0.440426	0.552017	0.650964
	14				2.98953	3.68052	3.27295	2.73843	1.72831	3.28046	3.03371	2.32301	1.03463	0.481953	0.469214	0.7	1.2913
	15				4.86269	1.91579	2.85823	2.16785	0.982183	1.47111	2.051	1.26338	0.963597	0.690678	0.919149	1.81978
	16				0.516971	0.884514	2.27577	2.48244	0.522624	0.929204	1.01092	1.06667	0.646552	0.611465	0.966173
	17					1.68717	3.24737	3.23114	0.741259	1.18594	1.0022	0.677419	0.465957	1.48485

## Sheet: CV
MeanVelocity
Signals of insufficient quality were excluded from the property maps. Signals could be rejected based on noise low amplitude, large artefact or ventricluar farfields that could not be substracted.
		1	2	3	4	5	6	7	8	9	10	11	12	13	14	15	16	17
1	1					1.24853	1.15104	0.956693	0.756656	0.741797	0.751798	0.803239	0.876265	0.87888					1																		1
	2				1.45124	1.21244	0.96358	0.711363	0.690644	0.725677	0.76534	0.669257	0.809713	0.873861	0.792439
0.00808388	3				1.33461	0.956841	0.823026	0.628188	0.674018	0.734345	0.664793	0.687908	0.822121	0.750488	0.79651	0.740791
	4				1.17659	0.785538	0.757397	0.612822	0.674083	0.662747	0.664439	0.687909	0.785703	0.753469	0.767927	0.793301	0.721217
	5				1.14477	0.795869	0.69668	0.657073	0.676921	0.629158	0.650772	0.669593	0.711276	0.822091	0.714177	0.72254	0.728739	0.695085
	6				1.02327	0.66918	0.590441	0.616315	0.677195	0.609708	0.600169	0.590276	0.624595	0.700159	0.638421	0.658926	0.664867	0.696486
	7				0.928538	0.675797	0.560435	0.615657	0.663489	0.61647	0.595114	0.574087	0.599281	0.601099	0.640359	0.666098	0.67129	0.629377
	8				0.953725	0.709832	0.612563	0.762726	0.812026	0.736119	0.556921	0.557247	0.554881	0.561881	0.633374	0.681911	0.75399	0.62962
	9				0.938837	0.724531	0.771127	0.878293	0.957319	0.745297	0.621202	0.574296	0.610579	0.626218	0.720592	0.692745	0.694182	0.599099
	10				1.20792	0.968305	0.857626	0.985433	0.771567	0.631243	0.583987	0.629757	0.691613	0.766088	0.880365	0.82617	0.720668	0.620484
	11				1.37797	0.995862	0.850417	0.805843	0.659171	0.562774	0.532807	0.713653	0.740539	0.886023	0.969108	0.856477	0.740411	0.683164
	12				1.35365	1.06076	0.871207	0.742853	0.597448	0.536925	0.539927	0.693604	0.73452	0.793608	0.864377	0.822575	0.707996	0.75558
	13				1.32448	1.06458	0.873434	0.701288	0.638788	0.575293	0.590559	0.73561	0.875252	0.830614	0.828352	0.780791	0.726798	0.752762
	14				1.03159	0.915905	0.78921	0.688275	0.593053	0.561014	0.631899	0.828089	1.06431	1.08244	0.96631	0.902602	0.805337
	15				0.97958	0.833042	0.845626	0.739212	0.636407	0.5697	0.658971	0.795102	1.06238	1.19638	1.11647	0.974441
	16				0.853923	0.797306	0.741735	0.760022	0.626121	0.588838	0.640204	0.794775	1.00176	1.33712	1.15803
	17					0.828049	0.740734	0.748269	0.659076	0.638701	0.65479	0.733605	0.849102	1.19917
2	1					1.27626	1.07083	0.939871	0.857076	0.827103	0.79471	0.916181	0.866934	0.816364					2																		2
	2				1.47401	1.24873	0.919577	0.760274	0.703466	0.673029	0.730249	0.661711	0.768293	0.810273	0.79053
0.00789122	3				1.37582	1.02651	0.876951	0.639535	0.646976	0.648242	0.644878	0.679795	0.738791	0.706138	0.766524	0.748398
	4				1.18249	0.938727	0.842021	0.648008	0.664443	0.680645	0.617611	0.678489	0.730996	0.721884	0.738115	0.77392	0.696116
	5				1.12063	0.85841	0.74901	0.666067	0.689773	0.657153	0.62606	0.649419	0.701148	0.736817	0.652497	0.7107	0.715038	0.632422
	6				1.02102	0.74899	0.709986	0.638507	0.684808	0.596747	0.588244	0.590268	0.626069	0.664445	0.638345	0.674497	0.67556	0.623735
	7				1.0565	0.765338	0.620792	0.680252	0.645342	0.589731	0.582005	0.633732	0.607316	0.577779	0.590186	0.698878	0.728618	0.68395
	8				1.03836	0.774018	0.699539	0.742406	0.839252	0.704787	0.637732	0.578561	0.594553	0.586249	0.553025	0.750188	0.750862	0.631346
	9				0.927874	0.760135	0.709842	0.874087	0.955462	0.782767	0.614147	0.642803	0.64888	0.582808	0.608355	0.677417	0.626783	0.592089
	10				1.14124	0.90514	0.843556	0.883673	0.744021	0.630426	0.565699	0.654121	0.683265	0.66052	0.745823	0.721354	0.636871	0.562626
	11				1.42478	0.931424	0.905517	0.74261	0.637293	0.608112	0.555238	0.693744	0.7001	0.742411	0.784748	0.777903	0.679365	0.650357
	12				1.49794	1.12688	0.900753	0.715291	0.558768	0.539934	0.564899	0.721283	0.70316	0.694518	0.727495	0.755176	0.698072	0.717637
	13				1.38436	1.04819	0.812989	0.679973	0.610224	0.55259	0.576622	0.757462	0.776352	0.73137	0.723553	0.76035	0.697029	0.737792
	14				0.916651	0.804183	0.802756	0.693428	0.630126	0.58568	0.681009	0.796018	0.896775	0.926483	0.881721	0.809767	0.750216
	15				0.804269	0.819151	0.779586	0.720922	0.670671	0.636161	0.730664	0.786053	0.997838	1.18328	1.09682	0.876818
	16				0.803929	0.711216	0.705803	0.712649	0.627493	0.608435	0.672891	0.782474	1.011	1.23725	1.14415
	17					0.754825	0.698639	0.689742	0.603934	0.598759	0.654828	0.739617	0.876036	1.21247
3	1					1.09322	1.04167	0.821175	0.755418	0.749544	0.817185	0.818245	0.80874	0.793011					3																		3
	2				1.42723	1.05494	0.867835	0.712633	0.703392	0.676214	0.749214	0.738158	0.799685	0.837666	0.807392
0.00854137	3				1.42976	1.03113	0.786137	0.669819	0.654491	0.665377	0.673657	0.745307	0.749906	0.76875	0.794114	0.754816
	4				1.21607	0.861924	0.748507	0.668657	0.714925	0.721168	0.616883	0.671325	0.780341	0.770026	0.795031	0.731656	0.684342
	5				1.13385	0.816963	0.727021	0.736485	0.737011	0.695093	0.632371	0.708621	0.727962	0.778459	0.738845	0.743844	0.676847	0.599628
	6				0.961327	0.691599	0.681913	0.73935	0.814608	0.665192	0.660531	0.728296	0.712978	0.674871	0.665385	0.63575	0.644086	0.578123
	7				0.934687	0.732694	0.6349	0.685417	0.72881	0.639575	0.652036	0.684371	0.667289	0.642219	0.667868	0.67704	0.617161	0.584726
	8				0.972532	0.794126	0.68655	0.808291	0.915215	0.788945	0.624137	0.631079	0.635512	0.621226	0.595477	0.693404	0.668639	0.591453
	9				0.93269	0.72373	0.705275	0.985757	1.04953	0.77892	0.614009	0.646432	0.641795	0.620811	0.639512	0.643545	0.611849	0.550925
	10				1.13309	0.874379	0.861138	0.903364	0.765819	0.682648	0.559397	0.670929	0.691496	0.742162	0.770763	0.726725	0.617708	0.556548
	11				1.43223	0.937924	0.879538	0.715715	0.635482	0.601402	0.601396	0.63592	0.691345	0.785721	0.763284	0.717853	0.654281	0.62367
	12				1.42504	1.02959	0.824977	0.694409	0.574651	0.563843	0.57334	0.688831	0.686877	0.680807	0.717111	0.701786	0.676601	0.665427
	13				1.18015	1.03389	0.856598	0.706476	0.647278	0.624067	0.601076	0.769669	0.807804	0.744871	0.730389	0.708512	0.661506	0.712744
	14				1.10838	0.936729	0.7791	0.663715	0.590648	0.610302	0.740389	0.821686	0.967375	0.861904	0.827922	0.77182	0.719038
	15				0.917971	0.806555	0.775091	0.67969	0.644357	0.601142	0.665511	0.800935	1.01208	1.08839	0.94431	0.86526
	16				0.903015	0.801687	0.739901	0.719545	0.610991	0.587225	0.608198	0.740257	0.941103	1.11613	1.04899
	17					0.79958	0.709934	0.686673	0.603388	0.579179	0.621637	0.694621	0.85084	1.09799
4	1					1.05349	1.06997	0.904453	0.747494	0.733502	0.848167	0.81942	0.834092	0.720242					4																		4
	2				1.45339	1.15088	0.961016	0.68662	0.69038	0.757799	0.800519	0.762495	0.84688	0.828514	0.777704
0.00831376	3				1.39003	1.01893	0.812418	0.697058	0.699597	0.761679	0.783474	0.82008	0.860119	0.834134	0.727026	0.708798
	4				1.20627	0.919878	0.746659	0.721896	0.728711	0.799209	0.699497	0.782667	0.861777	0.843239	0.803136	0.774449	0.733881
	5				1.23217	0.902226	0.818855	0.799016	0.845372	0.763718	0.729175	0.704186	0.781849	0.806753	0.675219	0.744358	0.730362	0.739226
	6				1.16321	0.764236	0.688751	0.730717	0.740575	0.64838	0.620331	0.562296	0.620928	0.644009	0.629006	0.703829	0.69154	0.718302
	7				1.10716	0.75032	0.598	0.681039	0.636808	0.610527	0.581686	0.621542	0.583712	0.57539	0.616169	0.648307	0.69577	0.650838
	8				0.994236	0.699662	0.647394	0.772676	0.839423	0.674041	0.618151	0.640705	0.60514	0.575421	0.573019	0.675987	0.699954	0.62355
	9				0.912595	0.85194	0.784021	0.928994	1.01843	0.767646	0.623522	0.629068	0.624835	0.610864	0.617037	0.683752	0.702281	0.614372
	10				1.14455	0.953279	0.929698	0.963772	0.879855	0.680221	0.666087	0.666007	0.696498	0.754936	0.698012	0.733097	0.626796	0.585853
	11				1.32137	0.973779	0.927057	0.811841	0.664986	0.648743	0.625127	0.682708	0.713812	0.76817	0.751076	0.70743	0.662894	0.621049
	12				1.41042	1.03923	0.826078	0.731785	0.607744	0.576717	0.612897	0.69003	0.718499	0.771909	0.765209	0.773817	0.689465	0.702125
	13				1.26203	1.08839	0.843755	0.683931	0.647583	0.608074	0.664703	0.749794	0.803412	0.767092	0.78685	0.746057	0.684678	0.700618
	14				0.947666	0.917025	0.899327	0.705022	0.64838	0.620392	0.692162	0.788833	0.877431	0.909425	0.848671	0.811075	0.723306
	15				0.896604	0.869737	0.856423	0.747575	0.650478	0.64142	0.732101	0.803135	0.941362	1.0744	1.033	0.874623
	16				0.874795	0.822726	0.766844	0.760219	0.64994	0.600938	0.656514	0.76256	0.869805	1.1661	1.11735
	17					0.814474	0.753531	0.661371	0.630456	0.610001	0.643504	0.687379	0.782882	1.13274
5	1					1.21199	1.02477	0.941014	0.805336	0.746515	0.696525	0.785055	0.828792	0.774683					5																		5
	2				1.4656	1.1549	0.86298	0.730898	0.678565	0.674191	0.721169	0.687267	0.833584	0.860655	0.753483
0.00845669	3				1.35265	1.01378	0.775398	0.68354	0.655792	0.660526	0.660095	0.693509	0.797052	0.836608	0.741652	0.751585
	4				1.17304	0.843265	0.728308	0.617986	0.689071	0.736881	0.603265	0.708414	0.773093	0.806495	0.773776	0.797927	0.718091
	5				1.13489	0.840486	0.748431	0.693721	0.694743	0.71103	0.684862	0.632217	0.729818	0.733674	0.71762	0.686403	0.728334	0.742937
	6				1.16011	0.694887	0.626168	0.690341	0.659823	0.588501	0.585973	0.598788	0.602464	0.621141	0.628597	0.651168	0.682107	0.643457
	7				0.992902	0.705513	0.614344	0.619595	0.652097	0.612883	0.598191	0.605883	0.594772	0.558701	0.610903	0.746954	0.753656	0.634808
	8				1.05178	0.77448	0.647222	0.714047	0.789884	0.723968	0.57551	0.593652	0.57584	0.562336	0.556061	0.721952	0.751794	0.652946
	9				0.899934	0.722732	0.708145	0.845797	0.887125	0.768741	0.616728	0.588362	0.588124	0.59118	0.627653	0.696013	0.676487	0.613983
	10				1.11525	0.873639	0.86348	0.872501	0.770155	0.650348	0.542231	0.58444	0.645617	0.685344	0.757483	0.790992	0.68508	0.59641
	11				1.32919	0.896775	0.942925	0.786802	0.632401	0.594685	0.573402	0.608448	0.662263	0.758796	0.813113	0.795474	0.702918	0.648639
	12				1.38636	1.09481	0.881375	0.705186	0.590031	0.586479	0.570483	0.670823	0.699575	0.709179	0.734611	0.732413	0.686145	0.671552
	13				1.2833	1.02376	0.983606	0.77903	0.73644	0.631713	0.651703	0.760229	0.830465	0.736278	0.754477	0.741011	0.674055	0.710793
	14				0.96046	0.887076	0.82928	0.752375	0.645994	0.650966	0.677697	0.87149	0.938723	0.891806	0.843527	0.836783	0.741051
	15				0.882768	0.8045	0.86272	0.72624	0.635654	0.625164	0.761093	0.864018	1.0976	1.1949	1.0845	0.913217
	16				0.871987	0.749484	0.749471	0.714081	0.614039	0.62426	0.6644	0.844523	0.967071	1.30255	1.09736
	17					0.748431	0.686611	0.671739	0.591383	0.58848	0.649332	0.757147	0.887411	1.16201
6	1					1.11568	1.07043	0.929763	0.775491	0.756608	0.762301	0.831079	0.810378	0.713175					6																		6
	2				1.49463	1.13674	0.887019	0.664348	0.670176	0.680443	0.756388	0.712013	0.77625	0.769058	0.743872
0.00827431	3				1.3968	0.951345	0.785339	0.634652	0.652643	0.726632	0.681921	0.730881	0.804332	0.736679	0.789677	0.733712
	4				1.19755	0.874528	0.742195	0.644557	0.724744	0.76159	0.639884	0.690339	0.813663	0.807921	0.750935	0.787001	0.735623
	5				1.16342	0.888367	0.751005	0.654511	0.741556	0.726638	0.730051	0.656513	0.728518	0.774883	0.691991	0.672972	0.696832	0.672019
	6				1.13745	0.787533	0.667315	0.620133	0.679846	0.686392	0.633605	0.638743	0.647968	0.663249	0.623555	0.605398	0.625172	0.646224
	7				1.1142	0.751771	0.610095	0.617847	0.695086	0.595059	0.649865	0.639114	0.675698	0.571903	0.597671	0.637258	0.642282	0.588229
	8				1.03683	0.781781	0.643637	0.725459	0.868162	0.7591	0.63886	0.678963	0.670013	0.61963	0.572269	0.643655	0.615291	0.57214
	9				0.974055	0.780234	0.706829	0.848574	0.974375	0.823573	0.646603	0.692554	0.684351	0.591554	0.606856	0.583567	0.599401	0.57123
	10				1.09956	0.869959	0.834448	0.827885	0.798458	0.663409	0.609184	0.658395	0.69017	0.70729	0.669638	0.662096	0.562338	0.536042
	11				1.2609	0.967435	0.872239	0.744357	0.649053	0.619934	0.599938	0.665189	0.697829	0.756905	0.741523	0.665011	0.627714	0.574298
	12				1.39853	1.07448	0.804443	0.694985	0.584139	0.562395	0.568914	0.709626	0.716715	0.691038	0.69681	0.673412	0.656299	0.621557
	13				1.36428	1.07886	0.843368	0.685599	0.647472	0.612628	0.63386	0.709735	0.787924	0.731005	0.731501	0.737375	0.69972	0.682503
	14				0.935787	0.905091	0.835883	0.72013	0.673893	0.636344	0.69494	0.803743	0.854259	0.851979	0.819331	0.779764	0.701999
	15				0.874469	0.818376	0.790775	0.725533	0.669555	0.645538	0.711124	0.809714	0.912157	0.979278	0.929907	0.821252
	16				0.793372	0.753576	0.752703	0.726169	0.632121	0.591706	0.630656	0.732683	0.873446	0.957539	0.955934
	17					0.757272	0.722759	0.689023	0.628691	0.611087	0.627335	0.701041	0.800342	0.952594
7	1					1.3301	1.0922	0.959853	0.808886	0.768647	0.813863	0.793112	0.82538	0.719892					7																		7
	2				1.48209	1.25433	0.96992	0.764516	0.686152	0.668661	0.697435	0.660997	0.803257	0.792938	0.812052
	3				1.46772	1.09866	0.822585	0.649972	0.674123	0.657526	0.675163	0.729033	0.798437	0.758104	0.783811	0.669716
	4				1.2573	0.924726	0.860179	0.667254	0.737149	0.718178	0.638934	0.677712	0.7879	0.813762	0.727966	0.713117	0.669248
	5				1.24557	0.926673	0.861278	0.74573	0.788911	0.69341	0.662463	0.656232	0.68139	0.783156	0.730495	0.674923	0.666872	0.637175
	6				1.08615	0.745088	0.666864	0.669	0.684923	0.640452	0.641114	0.627063	0.612621	0.635232	0.626949	0.621062	0.604614	0.603831
	7				0.962751	0.737583	0.635076	0.658899	0.719193	0.60807	0.672826	0.621161	0.580794	0.561494	0.552589	0.675895	0.664589	0.627712
	8				0.959289	0.729736	0.613376	0.703819	0.92194	0.815339	0.597838	0.60463	0.585886	0.553563	0.550105	0.652718	0.724905	0.631682
	9				0.939829	0.792886	0.696683	0.826286	0.933466	0.724684	0.625509	0.58979	0.617783	0.573961	0.586924	0.68257	0.653941	0.596446
	10				1.08992	0.859547	0.820869	0.865639	0.712333	0.592912	0.56479	0.639007	0.626267	0.641845	0.689983	0.694209	0.650862	0.562991
	11				1.32001	0.900339	0.852113	0.711688	0.621281	0.587157	0.548279	0.645893	0.684746	0.757225	0.742002	0.747268	0.642676	0.605941
	12				1.42554	1.0629	0.815892	0.708299	0.614854	0.554532	0.515409	0.710396	0.693728	0.697579	0.725003	0.70569	0.65435	0.669769
	13				1.40546	1.11495	0.901865	0.757895	0.707773	0.642505	0.609803	0.767376	0.749161	0.757653	0.729222	0.742261	0.681445	0.676148
	14				1.05529	0.933852	0.854942	0.719234	0.648182	0.640022	0.695843	0.83096	0.884581	0.911582	0.830289	0.794187	0.700452
	15				0.826418	0.793676	0.799676	0.708411	0.661176	0.604476	0.669486	0.755841	0.925104	1.15138	1.0149	0.849656
	16				0.832499	0.708534	0.685365	0.709067	0.639168	0.608677	0.610626	0.700385	0.840829	1.18813	1.05927
	17					0.729812	0.707296	0.68584	0.640508	0.600301	0.608773	0.694756	0.818385	1.21328
8	1					1.04596	0.92448	0.829663	0.750492	0.744953	0.75617	0.791454	0.807672	0.699533					8																		8
	2				1.28943	1.03996	0.840732	0.682207	0.656175	0.642468	0.679205	0.714152	0.777759	0.730294	0.764851
0.00839267	3				1.18668	0.92321	0.788168	0.627408	0.654015	0.639068	0.660869	0.714056	0.80496	0.76275	0.77873	0.724279
	4				1.13178	0.769353	0.74441	0.64238	0.678088	0.700242	0.663783	0.69107	0.767022	0.75719	0.779395	0.847122	0.730428
	5				1.08429	0.841162	0.676147	0.710249	0.75446	0.685542	0.610579	0.644959	0.705617	0.771377	0.690736	0.704474	0.70257	0.643756
	6				1.01138	0.675849	0.59564	0.659873	0.70542	0.582606	0.575693	0.574774	0.635313	0.649756	0.648144	0.632861	0.603078	0.638708
	7				0.981664	0.6655	0.592257	0.656803	0.738398	0.656441	0.655369	0.630516	0.597111	0.603561	0.584316	0.646367	0.667556	0.669497
	8				0.983034	0.648128	0.634864	0.830456	0.92441	0.884614	0.625559	0.601533	0.652873	0.611137	0.551104	0.666466	0.680545	0.646001
	9				0.911567	0.722363	0.689136	0.971005	1.07096	0.861585	0.644631	0.624246	0.624529	0.595932	0.602406	0.629667	0.650868	0.569535
	10				1.0518	0.810309	0.775772	0.917217	0.825319	0.671176	0.582404	0.63659	0.63721	0.676881	0.746	0.750463	0.641751	0.586319
	11				1.29516	0.819039	0.837559	0.792281	0.67719	0.626286	0.576853	0.632732	0.662187	0.752779	0.769669	0.734303	0.668943	0.627039
	12				1.39919	1.05819	0.954998	0.727485	0.593885	0.562264	0.593024	0.734949	0.74131	0.694843	0.721715	0.69664	0.678036	0.653901
	13				1.23053	0.991999	0.857459	0.722043	0.654477	0.598757	0.660613	0.739069	0.811396	0.746009	0.741627	0.729516	0.656568	0.676091
	14				0.977878	0.971557	0.769315	0.71707	0.638646	0.635481	0.677828	0.815677	0.922146	0.880919	0.829902	0.766928	0.709772
	15				0.879115	0.817701	0.810625	0.741975	0.637636	0.61006	0.693523	0.783369	1.00299	1.13237	1.01034	0.821636
	16				0.856425	0.799507	0.781016	0.724194	0.631942	0.616841	0.615194	0.766791	0.91073	1.20534	1.03133
	17					0.816565	0.741573	0.683632	0.630334	0.596035	0.631974	0.700397	0.836439	1.20917
9	1					1.22199	1.15357	0.97002	0.776921	0.790095	0.745541	0.854664	0.865368	0.793349					9																		9
	2				1.4628	1.14981	0.996322	0.76201	0.693281	0.681182	0.746017	0.750844	0.7785	0.737995	0.760227
0.00851199	3				1.30214	0.91813	0.779546	0.630753	0.657423	0.720261	0.638098	0.695176	0.768103	0.730191	0.750348	0.722902
	4				1.22607	0.784139	0.746556	0.637677	0.674541	0.722926	0.59726	0.680472	0.726163	0.766469	0.732622	0.770546	0.700571
	5				1.16378	0.845161	0.72856	0.643606	0.704746	0.720462	0.658689	0.647474	0.6951	0.761771	0.687242	0.707416	0.704208	0.66683
	6				1.01823	0.67415	0.620528	0.616829	0.699965	0.655392	0.617852	0.609785	0.637079	0.658707	0.656734	0.674198	0.671318	0.670021
	7				1.07022	0.725992	0.572825	0.622323	0.667502	0.620502	0.651307	0.617906	0.594036	0.582112	0.575847	0.683473	0.716183	0.634224
	8				1.04064	0.723714	0.605794	0.70596	0.870089	0.761679	0.636412	0.602783	0.586331	0.580413	0.547652	0.655458	0.724445	0.645837
	9				0.910465	0.744708	0.695282	0.828367	0.958039	0.822319	0.622995	0.631937	0.61734	0.562865	0.58497	0.619507	0.630512	0.591929
	10				1.236	0.886191	0.874355	0.891454	0.876696	0.705322	0.60092	0.603761	0.637111	0.669059	0.694634	0.695527	0.618451	0.557447
	11				1.36584	0.935307	0.898019	0.749858	0.658952	0.629887	0.612875	0.649157	0.644005	0.701767	0.722478	0.711678	0.66549	0.622727
	12				1.50483	1.06003	0.866164	0.708789	0.611514	0.572344	0.587821	0.703648	0.687835	0.671893	0.703334	0.734543	0.679661	0.667746
	13				1.38162	1.11116	0.870681	0.754288	0.690927	0.666295	0.66717	0.752986	0.745124	0.774431	0.72013	0.718691	0.662173	0.661614
	14				0.928999	0.918148	0.856407	0.714358	0.628116	0.665609	0.738321	0.81495	0.948127	0.891244	0.833267	0.785465	0.708484
	15				0.894969	0.795811	0.777574	0.719039	0.648657	0.671476	0.704118	0.830394	0.983608	1.13552	0.996583	0.885619
	16				0.871145	0.763262	0.736697	0.672486	0.655452	0.61499	0.602586	0.741969	0.946459	1.1978	1.01191
	17					0.752977	0.701674	0.618972	0.598422	0.591435	0.610245	0.692804	0.878933	1.19809
10	1					1.32895	1.07927	0.938837	0.757197	0.722133	0.798128	0.905786	0.820707	0.834204					10																		10
	2				1.61606	1.20265	0.95309	0.684912	0.68227	0.677363	0.794279	0.780114	0.843939	0.829961	0.809104
0.177443	3				1.35069	0.898732	0.68504	0.618944	0.643185	0.699894	0.667286	0.724453	0.805074	0.779023	0.794147	0.741922
	4				1.1227	0.756505	0.690841	0.632725	0.712552	0.746672	0.632526	0.67084	0.734681	0.781587	0.765368	0.795678	0.720936
	5				1.03384	0.764274	0.709385	0.720466	0.7465	0.679159	0.664517	0.712797	0.682874	0.705621	0.670643	0.720369	0.686384	0.634575
	6				0.973961	0.662274	0.661071	0.687028	0.657393	0.632677	0.572767	0.605654	0.634546	0.628407	0.605314	0.656231	0.659961	0.627066
	7				0.97013	0.76324	0.610567	0.636196	0.692484	0.670258	0.694225	0.644621	0.577881	0.557303	0.562388	0.708525	0.752039	0.689891
	8				1.0326	0.682358	0.625724	0.745093	0.890565	0.80587	0.659324	0.605426	0.573882	0.592655	0.56837	0.716552	0.719023	0.662431
	9				0.87434	0.747384	0.782722	0.905895	1.0188	0.791614	0.646612	0.622415	0.612965	0.616698	0.618003	0.70717	0.674535	0.619951
	10				1.13019	0.897392	0.922356	0.941479	0.751495	0.641236	0.604989	0.628563	0.685934	0.716991	0.781187	0.79527	0.69999	0.61547
	11				1.33102	0.93534	0.975979	0.811693	0.669565	0.593982	0.598545	0.657746	0.804146	0.833448	0.868063	0.735998	0.667039	0.668514
	12				1.42014	1.02559	0.881025	0.729742	0.595919	0.543832	0.571625	0.754691	0.723563	0.767921	0.740855	0.726087	0.700995	0.729064
	13				1.27376	1.03298	0.819626	0.721676	0.615427	0.638158	0.658766	0.82348	0.860766	0.740121	0.742554	0.737392	0.720935	0.774663
	14				1.00609	0.94619	0.782162	0.626853	0.573215	0.57833	0.691983	0.895115	1.03027	0.95177	0.837334	0.817688	0.718739
	15				0.914147	0.873763	0.831604	0.665009	0.589877	0.621527	0.670666	0.832807	1.06959	1.2123	1.09027	0.925329
	16				0.885507	0.802029	0.775266	0.708419	0.617769	0.623915	0.625982	0.808455	0.962091	1.29794	1.15085
	17					0.755547	0.679447	0.665261	0.628427	0.60459	0.634318	0.721915	0.860438	1.2211

## Sheet: Pref
Preferentiality
Signals of insufficient quality were excluded from the property maps. Signals could be rejected based on noise low amplitude, large artefact or ventricluar farfields that could not be substracted.
		1	2	3	4	5	6	7	8	9	10	11	12	13	14	15	16	17
1	1					1.26423	1.41724	1.60506	1.68069	1.45368	1.02748	0.844908	2.22294	2.19198					1																		1
	2				1.16247	1.18783	1.41025	1.64172	1.83699	1.74161	0.5664	0.529516	0.79105	1.29749	2.15284
0.00808388	3				1.32967	1.40544	1.50712	1.58808	1.87933	1.8186	0.451997	0.269142	0.522942	0.737207	2.12101	2.28636
	4				1.53654	1.55452	1.86451	1.67273	2.09123	2.66173	2.86934	0.293746	0.533068	0.516808	0.522423	2.63599	2.32225
	5				1.22297	0.0994051	2.30423	2.01677	2.2834	2.45521	2.53497	3.02357	0.439672	0.827749	0.508874	0.707489	2.00289	2.29483
	6				0.733376	0.137789	0.403911	3.05987	2.12527	2.39172	2.49091	2.07443	1.36035	1.3551	1.25846	1.43373	1.88098	2.23466
	7				1.4822	0.279473	0.0542971	0.960129	1.54715	1.88347	1.87714	2.12814	1.85307	1.82659	1.53546	1.66858	2.07293	2.51463
	8				1.09792	0.789083	3.09294	2.33404	1.5027	3.03159	2.589	2.38453	2.20646	2.01469	1.88711	2.08214	2.29368	2.70276
	9				0.726502	0.395097	2.9757	2.11499	2.05146	0.064662	0.0199446	2.87062	2.67389	2.53492	2.50515	2.56631	2.64518	2.91937
	10				0.518312	2.88103	2.45043	2.19943	1.98233	0.597769	0.248236	3.1179	3.03615	3.05167	2.93527	2.90755	2.95195	2.9655
	11				0.810601	2.43342	2.14965	2.00282	1.48046	0.680652	0.530393	0.188477	0.250017	0.327838	0.291571	3.10836	3.038	2.82011
	12				1.99126	1.93803	1.77979	1.66071	1.34796	0.960455	0.604621	0.419619	0.565969	0.588788	0.546543	0.147033	3.08349	2.67262
	13				2.06274	1.97285	1.65961	1.28825	0.86509	0.874486	0.463182	0.41928	0.785416	0.493836	0.277346	0.118127	0.0436788	2.10626
	14				2.08497	2.12912	1.86796	0.845868	0.320258	3.10992	3.05011	2.94045	0.13286	0.0570384	2.92259	2.67843	2.45354
	15				2.20276	2.28489	2.44367	3.10123	3.06709	2.97677	2.83669	2.62045	2.375	0.275419	2.36414	2.10747
	16				2.1845	2.25876	2.44957	2.96858	2.93761	2.81671	2.64223	2.50701	2.2089	1.56471	1.76753
	17					2.57125	2.88806	3.06268	2.8731	2.66118	2.52964	2.45493	2.2924	1.61299
2	1					1.28802	1.43937	1.60984	1.61405	1.43527	1.36849	1.0403	2.14293	2.15908					2																		2
	2				1.1368	1.29282	1.51604	1.60738	1.76167	1.5996	0.531389	0.252079	0.92179	0.942249	2.11941
0.00789122	3				1.24979	1.45699	1.6338	1.5452	1.68701	1.41738	0.24678	0.204163	0.589266	0.692745	2.4257	2.26541
	4				1.16087	1.46713	1.80594	1.53314	2.0074	2.96712	2.77562	0.0873164	0.513007	0.393758	0.311376	2.72458	2.46822
	5				1.05419	0.628901	2.03456	2.10834	2.17115	2.75943	2.7823	2.70804	3.12843	0.234673	0.100135	3.07788	2.37253	2.42567
	6				1.15761	0.178393	0.804054	1.83579	2.26508	2.39166	2.63591	2.59548	2.43142	0.165645	0.326435	0.0830533	2.36999	2.38933
	7				1.51846	0.591262	0.516464	1.20545	1.67801	1.61891	3.02563	2.68689	2.79741	2.75642	0.383932	2.79039	2.65459	2.74371
	8				0.997167	0.549604	0.167315	2.43451	2.15546	3.05553	0.0866409	2.83103	3.00216	2.88899	2.9858	2.77467	2.84033	3.00038
	9				0.698239	0.546644	2.93073	2.15708	2.26651	0.13151	0.147178	0.0993165	0.0905124	0.00979182	3.12521	2.81476	2.8799	2.99501
	10				0.4543	2.93601	2.30242	2.09145	1.88504	0.53774	0.342485	0.141171	0.16938	0.08441	3.03651	2.87876	2.97725	2.9335
	11				2.56179	2.40833	2.08293	1.94792	1.6829	0.67113	0.506847	0.344846	0.342332	0.201444	3.12235	2.95706	2.95986	2.66831
	12				2.00604	1.9936	1.77921	1.69844	1.59337	0.949889	0.45283	0.4581	0.471127	0.339108	0.0229207	0.0743449	2.63378	2.27508
	13				1.92738	1.97193	1.60005	1.15467	0.966808	0.913948	0.398462	0.332622	0.62555	0.217949	0.372902	1.02482	1.48484	1.71378
	14				2.0738	2.15783	2.23091	0.690448	0.34942	3.10703	2.94117	2.87748	2.831	2.8144	3.07291	2.59138	1.71555
	15				2.16516	2.27455	2.66139	0.0933693	0.0880403	3.08526	2.85992	2.61481	2.53465	2.02347	2.06359	1.92333
	16				2.21913	2.31211	2.55567	3.10773	3.03884	2.89524	2.74092	2.55803	2.35277	1.77216	1.75228
	17					2.52706	2.89	3.08459	2.82191	2.70853	2.55749	2.48758	2.3401	1.69779
3	1					1.26849	1.37926	1.48757	1.5046	1.21262	0.999442	0.588788	1.72577	2.11633					3																		3
	2				1.20334	1.27047	1.40473	1.46129	1.59647	1.24808	0.464188	0.425347	0.191302	2.80048	2.27941
0.00854137	3				1.32827	1.39936	1.43191	1.45532	1.6065	1.27028	0.39703	0.147967	0.0291953	2.90984	2.47902	2.37652
	4				1.50124	1.60836	1.81397	1.36844	1.68548	2.85742	2.75138	0.0486061	0.300538	0.150265	3.05651	2.7091	2.47279
	5				1.40434	1.28158	1.90573	2.10726	1.92937	2.41166	2.86949	2.77407	2.71222	3.07641	3.0361	2.96053	2.4601	2.38741
	6				1.31627	0.482333	0.918552	1.84683	1.9181	2.05511	2.90869	2.03306	1.87729	1.76496	0.694861	3.10312	2.19319	2.39597
	7				1.34084	0.574025	0.220622	1.18868	1.65797	1.58185	0.775736	2.30599	2.47132	2.56528	1.48073	2.17892	2.56935	2.77071
	8				0.950919	0.532886	0.192073	0.66478	2.07012	3.07999	0.232309	2.48901	2.65077	2.71916	0.346507	2.79531	2.86074	2.98561
	9				0.702883	0.300454	3.01204	2.31642	2.11138	0.017226	0.0215035	3.00188	3.04477	0.10408	3.09157	3.06506	3.00019	3.11152
	10				0.850586	2.60326	2.34073	2.17687	1.79786	0.708592	0.313974	0.0587582	0.199118	0.124888	0.0569715	0.0085573	3.13047	3.09834
	11				2.01559	2.34809	2.16592	1.88137	1.58268	0.86729	0.600072	0.270965	0.362434	0.346934	0.242264	0.028245	0.0481158	2.94304
	12				1.66928	1.90779	1.82015	1.76363	1.61941	0.976041	0.670674	0.688748	0.615413	0.521633	0.401297	0.217461	0.00942391	2.75955
	13				2.13278	2.11386	1.67513	1.39144	1.03147	0.805989	0.492288	0.563501	0.591319	0.473868	0.392944	0.489821	0.823978	1.69291
	14				2.11351	2.17876	2.28844	0.50272	0.388949	0.00230058	3.04064	2.8209	0.330854	0.0720358	0.058486	3.05303	1.59294
	15				2.21528	2.35327	2.59261	3.08176	3.05315	3.00055	2.7697	2.62573	2.39635	1.22479	2.02058	2.00386
	16				2.28867	2.42408	2.61713	3.06556	2.94724	2.79773	2.6899	2.50562	2.23752	1.50828	1.42574
	17					2.73306	2.91536	3.07769	2.85236	2.63762	2.52742	2.4245	2.19795	1.57323
4	1					1.13265	1.27113	1.51912	1.66964	1.60188	1.46945	0.694506	2.07207	2.20976					4																		4
	2				1.01189	1.07144	1.25452	1.57399	1.81446	1.61775	0.618259	0.508777	0.696367	0.384866	2.52017
0.00831376	3				1.02441	1.1623	1.22582	1.54989	1.80785	1.6814	0.581298	0.203354	0.56646	0.373403	2.90195	2.74332
	4				1.12451	0.946187	1.32712	1.55503	1.92637	2.64258	2.72825	0.144696	0.467171	0.345174	0.134416	0.0192433	2.90633
	5				1.84954	2.95589	2.67718	2.20595	2.34122	2.705	2.83695	2.79208	0.552376	0.469603	0.336147	0.327277	3.14117	2.57742
	6				1.36603	0.424201	2.01394	2.18154	2.13604	2.27693	0.754832	1.5314	1.27423	1.19504	0.819177	0.674057	0.476794	2.73069
	7				1.26841	0.969684	0.793503	1.38308	1.60303	1.37297	0.919123	2.47986	2.19443	2.24488	1.31467	0.962709	0.535726	3.04684
	8				1.45369	1.34069	2.9044	1.55655	1.81461	2.87971	0.447055	3.03441	3.05603	2.7955	0.238324	1.02705	0.00507416	3.03252
	9				1.19743	0.769444	3.12666	1.9525	2.00507	0.393483	0.265301	0.133502	0.271651	0.122801	3.13446	0.0669193	2.8824	3.01468
	10				1.29887	2.21393	2.12532	2.05201	1.67758	0.873715	0.531263	0.191627	0.174206	0.153813	0.0519507	2.94871	3.0018	2.82343
	11				1.95153	2.15036	2.03828	1.75639	1.47282	0.730368	0.600158	0.378169	0.294503	0.31109	0.167581	2.81843	2.67624	2.42092
	12				1.95263	1.93991	1.81571	1.64637	1.39503	1.01715	0.657102	0.54424	0.523307	0.459058	0.391639	2.41232	2.1168	2.15726
	13				2.0302	1.90621	1.69785	1.35559	1.13446	0.870192	0.411349	0.525982	0.495356	3.10528	1.65582	1.96212	1.96707	1.86293
	14				2.10559	2.12691	2.1417	1.0244	0.419823	0.162872	2.95994	3.07496	3.01984	2.48212	2.44932	2.16583	1.8845
	15				2.22343	2.32384	2.46472	3.05523	0.0696107	2.98391	2.75987	2.64887	2.55815	2.15987	2.10845	1.88991
	16				2.28628	2.4118	2.58551	3.02067	2.93724	2.88309	2.71654	2.55535	2.29746	1.7591	1.78346
	17					2.72742	2.93921	3.00315	2.85489	2.7038	2.55871	2.47304	2.2553	1.67866
5	1					1.21914	1.38704	1.55461	1.49978	1.31249	1.33359	1.20841	1.68704	2.08067					5																		5
	2				1.13214	1.22276	1.46753	1.58367	1.74134	1.5082	0.591642	0.611582	0.663056	0.768343	2.05856
0.00845669	3				1.20774	1.28706	1.62662	1.48682	1.73712	1.26069	0.356532	0.303205	0.533333	0.71825	2.28194	2.27933
	4				1.3079	1.8285	1.74033	1.4854	1.94198	2.99714	2.94506	0.208785	0.518719	0.475164	0.212087	2.6408	2.47067
	5				1.48817	2.57472	2.10172	2.14164	2.27986	2.44459	2.77754	2.52362	3.08205	0.3311	0.292096	0.0729785	2.44555	2.39171
	6				1.60155	1.11994	0.683075	1.70157	2.05979	2.13626	2.14189	1.93014	1.73407	1.11813	0.635902	0.498032	2.43473	2.35744
	7				1.09026	0.509251	0.37989	1.01857	1.66294	1.58167	1.12319	2.42092	1.61511	2.86042	0.889302	0.646799	2.9506	2.70242
	8				0.894545	0.72846	0.21341	2.64318	2.00216	2.88787	0.315723	2.87116	0.140269	0.314613	0.51621	0.0276847	2.81368	2.90499
	9				1.01356	0.471329	2.85933	2.04659	2.13392	0.185581	0.098809	0.0821186	0.154266	0.170787	0.109741	2.98788	2.90784	3.03231
	10				2.96393	2.56543	2.23547	2.17927	1.78797	0.645211	0.242473	0.10697	0.16338	0.181621	0.00377914	3.04618	2.96038	2.97701
	11				2.34864	2.36272	2.18002	1.95043	1.39032	0.648522	0.510236	0.297587	0.260882	0.271629	0.266604	3.12593	3.09681	2.86292
	12				2.14025	2.03998	1.9027	1.72469	1.54633	0.89452	0.639185	0.567042	0.510703	0.503747	0.782337	0.691482	0.365261	0.178946
	13				2.11825	2.17276	1.75987	1.05401	0.987346	0.759698	0.437155	0.598873	0.659242	0.548307	0.962929	1.16041	1.22453	1.25566
	14				2.15718	2.26756	2.3543	0.0679762	0.0836143	0.0216669	2.94399	2.6316	2.17051	0.0606074	2.97156	2.87177	1.47076
	15				2.29641	2.39181	2.74027	3.05104	3.00126	2.92435	2.77841	2.66923	2.4915	2.92889	2.42203	1.72181
	16				2.30262	2.42069	2.72609	2.98889	2.89513	2.83817	2.70635	2.56731	2.37415	1.62475	1.60553
	17					2.60552	2.94094	2.98129	2.78133	2.71425	2.58788	2.49161	2.36558	1.6085
6	1					1.23136	1.39007	1.64039	1.63822	1.4407	1.25574	0.726217	1.97905	2.05953					6																		6
	2				1.11026	1.21865	1.47016	1.63237	1.82055	1.61336	0.722962	0.57551	1.0445	1.45798	2.17857
0.00827431	3				1.35094	1.44252	1.72488	1.53376	1.85414	1.75632	0.332221	0.212554	0.551732	0.452023	2.49976	2.54896
	4				1.54149	1.7679	1.81011	1.53962	1.7521	2.53295	2.84218	0.199892	0.133135	3.03564	2.96083	2.77745	2.46906
	5				1.82744	2.89214	1.89131	1.92181	2.11135	2.31904	2.92843	2.94757	2.63022	2.85591	2.90006	2.79273	2.42674	2.38912
	6				2.43459	0.0754836	0.286479	2.18675	2.1052	2.13712	2.1407	2.49578	1.92077	2.14907	2.72387	2.58454	2.48797	2.45864
	7				2.81044	0.0728588	0.034719	0.67567	1.73819	1.55828	1.29201	2.46674	2.59826	2.35877	2.29017	2.33918	2.77877	2.79126
	8				0.721644	0.591316	2.91873	2.55847	2.04129	2.4763	0.316382	2.85714	2.99826	2.64902	3.01176	2.94384	2.8833	2.93577
	9				0.60329	0.451165	2.96189	2.30418	2.06178	2.19283	0.186029	0.173529	0.234167	0.112344	0.142206	0.070477	2.96522	2.97041
	10				0.53944	2.55639	2.31399	2.10756	1.97443	1.13499	0.493362	0.215776	0.244184	0.174427	0.0833058	3.07199	3.0549	2.91836
	11				2.17641	2.24342	2.07434	1.88501	1.56177	0.927748	0.722837	0.384963	0.431812	0.286959	0.126525	3.08065	3.03398	2.78019
	12				2.23543	1.93367	1.83266	1.69838	1.48655	1.19722	0.790258	0.575399	0.586172	0.345948	0.178625	0.0504829	2.96509	2.65552
	13				2.15205	2.07428	1.79979	1.47366	1.1049	1.04459	0.768688	0.463419	0.553996	0.210077	0.0299308	2.86705	2.65863	2.06043
	14				2.10188	2.11411	2.17356	0.51763	0.315971	0.0109043	2.87451	2.63969	2.67286	2.75195	2.69889	2.54426	2.22688
	15				2.17442	2.21951	2.47995	0.013488	0.0323238	2.99664	2.72667	2.59315	2.39712	2.2429	2.17859	2.10501
	16				2.16921	2.23361	2.52989	3.09517	3.00325	2.8598	2.67856	2.51968	2.28154	1.8906	1.7791
	17					2.47608	2.8664	3.11685	2.95911	2.73651	2.58042	2.45743	2.27742	1.79562
7	1					1.20775	1.43585	1.57843	1.56595	1.34667	1.20335	0.854693	2.23735	2.21229					7																		7
	2				1.18107	1.21282	1.47366	1.58992	1.70895	1.87509	0.470054	0.503378	0.48042	2.20357	2.24717
	3				1.36947	1.37324	1.57636	1.42121	1.6567	1.63598	0.614666	0.324815	0.171681	2.89866	2.72152	2.7153
	4				1.36611	1.34951	1.76336	1.27587	1.90486	2.95342	2.93681	0.0997653	0.0433876	0.0512074	3.04997	2.8572	2.65443
	5				1.405	1.15569	0.166644	2.5026	2.2664	2.69152	2.70354	2.78959	2.92393	2.98069	2.31243e-05	3.09075	2.71521	2.63054
	6				1.52475	0.942322	0.971502	0.0444538	1.73749	2.37082	2.52355	2.90633	2.64219	2.85318	0.0712666	0.232665	3.00458	2.55655
	7				1.04704	0.561299	0.601515	0.805833	1.45017	1.18843	0.968271	2.54759	2.87553	2.73142	0.361048	0.551701	3.03148	2.93458
	8				1.18807	0.66323	0.326822	0.0364126	1.88796	0.241731	0.33167	3.04436	0.119946	3.11391	3.12706	2.85467	2.77545	2.93937
	9				0.467081	0.355792	0.00847316	2.31313	2.08098	0.459369	0.349569	0.289041	0.311035	0.196747	0.0976004	2.9836	2.76558	2.85263
	10				3.06274	2.69038	2.37719	2.28852	1.75534	0.757006	0.483766	0.195251	0.258312	0.212963	0.0118862	3.04113	2.88582	2.87696
	11				2.73726	2.34719	2.13451	1.88765	1.44366	0.62226	0.534961	0.368375	0.279782	0.193431	0.0901225	2.95091	2.93068	2.67267
	12				2.01923	1.98448	1.88537	1.82221	1.52443	0.801736	0.499024	0.471651	0.433308	0.16742	3.02207	2.87297	2.5777	2.2674
	13				2.06746	2.06719	1.74689	1.28479	0.960688	0.823437	0.274928	0.154118	0.0798601	2.68851	2.54441	2.3898	2.07806	1.87096
	14				2.15653	2.19067	2.35247	0.49056	0.211818	3.05443	2.89079	2.85832	2.70677	2.51358	2.50355	2.4266	2.00788
	15				2.24534	2.37348	2.72242	3.13696	3.0743	3.00645	2.80806	2.66714	2.55678	2.31211	2.27949	2.16482
	16				2.24463	2.41844	2.73433	3.1234	3.02099	2.87574	2.74439	2.55015	2.36974	2.04674	1.88761
	17					2.66771	2.9507	3.08489	2.9698	2.83136	2.67323	2.55221	2.39864	1.85891
8	1					1.25158	1.3992	1.67186	1.64953	1.55409	1.35841	0.773241	2.17872	2.05222					8																		8
	2				1.05164	1.13625	1.34072	1.67021	1.67309	1.9431	0.754847	0.540622	0.932776	1.88249	2.15326
0.00839267	3				1.11125	1.41558	1.47261	1.52996	1.57384	1.36656	0.416527	0.336081	0.549896	0.215963	2.61527	2.55731
	4				1.41176	0.571955	2.02021	1.62005	2.31583	3.09217	2.92583	0.0612571	0.104494	0.167823	3.10282	2.88728	2.55595
	5				0.655777	1.83641	2.44036	2.33342	2.48879	2.80904	2.65242	2.80046	2.99786	3.08832	3.01559	2.94834	2.60315	2.4947
	6				1.63162	0.80932	1.00391	2.0244	2.17651	2.43962	2.56665	2.52342	1.86099	0.261214	0.102314	3.13308	2.80559	2.53003
	7				0.720484	0.533338	0.473679	1.28279	1.63434	1.42645	0.732869	2.52463	2.56365	2.74591	3.12047	0.266919	2.97629	2.81247
	8				1.21353	0.49336	0.00574073	2.61771	2.15822	2.99562	0.127253	2.79733	2.75973	2.86038	0.0642774	0.0446896	3.13768	3.01607
	9				0.652684	0.341755	2.88355	2.29413	2.0654	3.08241	0.204556	0.108516	0.144755	0.0670616	0.123254	0.101729	3.0539	3.06147
	10				2.998	2.5919	2.38461	2.18662	1.94563	0.905835	0.548507	0.157505	0.160064	0.18463	0.109518	0.0719009	3.11666	2.97515
	11				2.29253	2.3963	2.16893	1.95991	1.7578	0.949174	0.645824	0.417215	0.371521	0.355409	0.307266	0.0620835	3.00802	2.69536
	12				1.89726	2.02764	1.92743	1.73537	1.63189	1.15516	0.659106	0.573358	0.526402	0.450612	0.504691	0.352328	2.98085	2.34813
	13				2.14325	2.06906	1.80389	1.35484	1.05417	1.2138	0.527423	0.64162	0.581198	0.462603	0.132248	2.32397	1.88452	1.91399
	14				2.11632	2.21619	2.09593	0.356372	0.0919397	3.00836	2.9577	2.92514	2.77591	2.81682	2.63199	2.51267	1.89838
	15				2.19672	2.35705	2.60303	0.0174057	0.00618624	3.00991	2.90712	2.67805	2.52475	2.38674	2.36636	2.0862
	16				2.24623	2.41018	2.67736	3.09708	2.98614	2.85676	2.78984	2.5693	2.31381	1.885	1.82468
	17					2.75987	2.93558	3.08214	2.90721	2.77528	2.6303	2.50229	2.32879	1.72833
9	1					1.28343	1.54004	1.80985	1.81992	1.56098	1.34713	1.19799	2.13828	2.24908					9																		9
	2				1.26855	1.26862	1.61478	1.72173	2.09784	2.09365	0.610607	0.485756	0.754001	1.18559	2.31176
0.00851199	3				1.3032	1.3833	1.66435	1.76892	2.01502	2.32119	0.315972	0.17118	0.721079	0.806963	2.56296	2.44435
	4				1.39195	1.40264	1.6387	1.78501	2.35036	2.96462	2.96599	0.201328	0.373829	0.428683	0.266898	2.82449	2.34776
	5				1.26862	1.13483	1.85168	2.13835	2.44122	2.70685	2.67928	2.92875	2.99244	3.13862	3.07071	0.0231968	2.32401	2.31152
	6				1.28615	0.540741	0.63468	2.52642	2.18139	2.40464	2.71614	2.32518	2.6043	2.53671	0.0564059	0.523379	2.11238	2.32944
	7				1.00285	0.422788	0.395748	0.95033	1.47394	1.26615	0.7276	2.6842	0.304392	2.69269	1.13437	0.686089	2.62607	2.7172
	8				0.861616	0.344157	0.0930504	2.80752	1.96529	3.04967	0.115659	2.88748	0.135941	3.03986	0.111391	3.03849	2.96936	3.06831
	9				0.713551	0.360901	3.0547	2.39109	2.18181	2.86061	0.110661	0.136763	0.325814	0.14804	0.242992	0.0676809	2.99209	3.08984
	10				0.131279	2.74737	2.41977	2.32655	2.10828	0.569678	0.217496	0.156434	0.24804	0.161589	0.0773296	3.12436	3.04581	2.98714
	11				2.29929	2.37783	2.14925	2.013	1.76997	0.774447	0.522616	0.325736	0.319154	0.277224	0.21347	0.0288443	2.9993	2.81046
	12				1.90522	1.94536	1.83591	1.72351	1.66022	0.94207	0.627102	0.570312	0.451803	0.289304	0.488039	1.03915	1.2506	2.59555
	13				2.0442	2.03127	1.66243	1.32111	1.17043	0.832291	0.236737	0.301359	0.738779	1.15686	1.74526	1.53937	1.80149	1.70043
	14				2.15758	2.23604	2.40407	0.588802	0.391029	0.0347324	2.97499	2.89012	2.82186	2.29845	2.30159	1.86401	1.85744
	15				2.25745	2.3889	2.71237	3.04395	0.0571441	3.03181	2.85043	2.68995	2.55135	2.25893	2.1449	2.00216
	16				2.29386	2.39886	2.72117	3.1205	3.00718	2.94607	2.73554	2.57558	2.33879	1.90478	1.75178
	17					2.65907	2.98296	3.1026	2.90261	2.77036	2.61193	2.48521	2.35644	1.81985
10	1					1.32855	1.56634	1.73477	1.53316	1.11873	0.975059	0.99375	1.86566	2.03762					10																		10
	2				1.12518	1.19096	1.53691	1.75693	1.98852	2.00958	0.608567	0.684813	0.791784	0.811939	2.17528
0.947017	3				1.33603	1.59259	1.80255	1.69262	1.91961	2.34625	0.481001	0.403517	0.702605	0.56502	2.1037	2.37437
	4				1.53771	1.94775	1.96009	1.71175	2.6436	2.81436	2.8858	0.0595926	0.315048	0.344401	0.134408	2.70174	2.34895
	5				1.20047	1.2922	2.4845	2.46647	2.58326	2.72826	2.8521	3.01496	2.81722	0.260657	0.165313	2.99638	2.19308	2.39618
	6				1.36998	0.524829	0.000591814	2.83109	2.19225	2.54256	2.75754	0.541746	1.92555	1.51952	0.47767	3.12998	2.26097	2.31803
	7				1.226	0.971429	0.298494	0.838457	1.68017	1.63225	1.92341	2.33383	2.44138	2.67506	1.52467	1.69993	2.18479	2.65367
	8				0.750822	0.614989	2.92502	2.97127	1.87544	0.0196817	0.10623	2.64419	2.62643	2.56841	2.08242	2.15788	2.34578	2.93037
	9				0.575611	0.362761	2.90559	2.2648	2.22119	0.139317	0.231897	3.10719	3.07341	2.99875	2.81279	2.69536	2.7667	3.00425
	10				0.270719	2.84171	2.44898	2.21742	1.89056	1.02401	0.571035	0.00221761	0.00475424	3.07235	2.9402	2.89817	2.98016	2.98579
	11				2.76638	2.47865	2.22759	2.05513	1.51458	0.54313	0.547419	0.238944	0.261549	0.257561	0.086443	3.06385	3.03652	2.80639
	12				1.91639	2.00404	1.86239	1.73747	1.46477	0.860883	0.544566	0.372397	0.580922	0.771223	0.681077	0.416836	3.13308	2.55112
	13				2.10666	1.9765	1.61703	1.40506	1.29919	0.954698	0.468952	0.135517	1.29309	0.991725	0.883488	0.790871	1.50254	1.88049
	14				2.12669	2.19861	2.11005	0.814061	0.0624305	2.98625	2.97765	2.84303	2.61607	0.69391	3.02077	2.46716	1.79755
	15				2.22755	2.29892	2.70634	3.07475	3.03625	2.95833	2.81971	2.66521	2.69747	1.36592	2.12556	2.09942
	16				2.20513	2.35491	2.67287	3.02607	2.94663	2.89075	2.74647	2.61599	2.34543	1.49979	1.78764
	17					2.67652	2.83904	3.0486	2.85639	2.72306	2.65004	2.55713	2.44782	1.65349
