# Supplementary material for: Stationary Atrial Fibrillation Properties in the Goat Do Not Entail Stable or Recurrent Conduction Patterns
Source: Front Physiol. 2018 Jul 27;9:947. doi: 10.3389/fphys.2018.00947 (PMC6072874; doi:10.3389/fphys.2018.00947)
Supplement: Supplementary file 1 [file Data_Sheet_1.ZIP › Goat_11_Property maps.xlsx]

## Sheet: AFCL
AFCL
Signals of insufficient quality were excluded from the property maps. Signals could be rejected based on noise low amplitude, large artefact or ventricluar farfields that could not be substracted.
		1	2	3	4	5	6	7	8	9	10	11	12	13	14	15	16	17
1	1					0.118383	0.118383	0.117902	0.117421	0.118383	0.120308	0.118383	0.119346	0.119346					1																		1
	2					0.118383	0.118383	0.117421	0.116458	0.117421	0.118383	0.119346	0.118383	0.117421	0.117421
	3			0.116458	0.116458	0.116458	0.116458	0.116458	0.116458	0.117421	0.117421	0.117421	0.116458	0.117421	0.117421	0.115496
	4		0.116458	0.115496	0.115496	0.115496	0.115496	0.115496	0.116458	0.116458	0.116458	0.117421	0.117421	0.117421	0.116458	0.115496	0.116458
	5	0.119346	0.117421	0.115496	0.115496	0.115496	0.115496	0.116458	0.116458	0.115496	0.116458	0.117421	0.117421	0.117421	0.115496	0.115496	0.116458	0.117421
	6	0.119346	0.118383	0.116458	0.115496	0.115496	0.115496	0.115496	0.115496	0.115496	0.115496	0.116458	0.117421	0.116458	0.115496	0.115496	0.115496	0.117421
	7	0.118383	0.118383	0.117421	0.116458	0.115496	0.115496	0.115496	0.115496	0.115496	0.115496	0.115496	0.115496	0.116458	0.115496	0.115496	0.116458	0.116458
	8	0.118383	0.118383	0.118383	0.116458	0.115496	0.115496	0.115496	0.114533	0.115496	0.116458	0.116458	0.116458	0.116458	0.115496	0.117421	0.116458	0.116458
	9	0.118383	0.118383	0.118383	0.116458	0.116458	0.115496	0.115496	0.115496	0.115496	0.116458	0.116458	0.116458	0.116458	0.117421	0.118383	0.116458	0.116458
	10	0.118383	0.119346	0.119346	0.116458	0.116458	0.115496	0.115496	0.115496	0.117421	0.118383	0.117421	0.117421	0.118383	0.118383	0.118383	0.116458	0.116458
	11	0.118383	0.118383	0.118383	0.118383	0.116458	0.117421	0.116458	0.116458	0.117421	0.117902	0.118383	0.119346	0.119346	0.118383	0.118383	0.117421
	12	0.119346	0.119346	0.117421	0.118383	0.117421	0.117421	0.117421	0.117421	0.117421	0.120308	0.119346	0.119346	0.119346	0.119346	0.119346
	13	0.119346	0.118383	0.118383	0.117421	0.119346	0.118383	0.117421	0.117421	0.118383	0.12127	0.120308	0.119346	0.118383
	14		0.118383	0.119346	0.118383	0.118383	0.120308	0.117421	0.117421	0.118383	0.120308	0.119346	0.120308	0.120308
	15			0.119346	0.119346	0.119346	0.120308	0.119346	0.119346	0.120308	0.119346	0.119346
	16				0.119346	0.119346	0.12127
	17					0.120308
2	1					0.120308	0.120308	0.120308	0.119346	0.120308	0.12127	0.120308	0.118864	0.118383					2																		2
	2					0.118383	0.118383	0.119346	0.118864	0.119827	0.120308	0.119346	0.119346	0.117421	0.117421
	3			0.117421	0.117421	0.117421	0.117421	0.118383	0.118383	0.118383	0.118383	0.119346	0.118383	0.117421	0.116939	0.116458
	4		0.117421	0.117421	0.116458	0.117421	0.117421	0.118383	0.118383	0.117421	0.117421	0.118383	0.118383	0.117421	0.116458	0.116458	0.116458
	5	0.119346	0.118383	0.117421	0.116458	0.117421	0.117421	0.117421	0.117421	0.117421	0.117421	0.118383	0.118383	0.117421	0.116458	0.115496	0.116458	0.117421
	6	0.119346	0.118383	0.117421	0.117421	0.116458	0.116458	0.117421	0.116458	0.115977	0.115496	0.116458	0.117421	0.116458	0.116458	0.116458	0.116458	0.117421
	7	0.118383	0.118383	0.118383	0.117421	0.116458	0.116458	0.116458	0.116458	0.116458	0.115496	0.116458	0.116458	0.116458	0.115496	0.116458	0.116458	0.116458
	8	0.118383	0.118383	0.118864	0.117421	0.116458	0.116458	0.116458	0.116458	0.115496	0.117421	0.116458	0.116458	0.116458	0.115977	0.117421	0.116458	0.116458
	9	0.120308	0.119346	0.120308	0.118383	0.117421	0.116458	0.116458	0.115496	0.116458	0.117421	0.116939	0.116458	0.116458	0.117421	0.117421	0.116458	0.116458
	10	0.120308	0.120308	0.12127	0.118383	0.116939	0.116458	0.116458	0.116458	0.118383	0.118383	0.117421	0.117421	0.119346	0.119346	0.117421	0.117421	0.116458
	11	0.120308	0.119346	0.119346	0.119346	0.118383	0.118383	0.116458	0.117421	0.118383	0.118383	0.118383	0.119346	0.120308	0.120308	0.118383	0.118383
	12	0.120308	0.120308	0.118383	0.119346	0.119346	0.118383	0.118383	0.117421	0.118383	0.120789	0.120308	0.120308	0.12127	0.12127	0.120308
	13	0.120308	0.119346	0.119346	0.118383	0.119346	0.119346	0.118383	0.118383	0.119346	0.12127	0.122233	0.12127	0.12127
	14		0.119346	0.120308	0.119346	0.118383	0.119346	0.118383	0.118383	0.119346	0.120308	0.12127	0.122233	0.12127
	15			0.120308	0.119827	0.120308	0.120308	0.120308	0.12127	0.120308	0.120308	0.12127
	16				0.119346	0.12127	0.120308
	17					0.12127
3	1					0.119346	0.118383	0.120308	0.118383	0.119346	0.12127	0.119346	0.118383	0.117421					3																		3
	2					0.117421	0.118383	0.118383	0.117421	0.117421	0.118383	0.118383	0.118383	0.117421	0.116458
	3			0.117421	0.117421	0.117421	0.117421	0.117421	0.117421	0.117421	0.117421	0.117421	0.116458	0.116458	0.116458	0.115496
	4		0.118383	0.117421	0.116458	0.116458	0.116458	0.116458	0.117421	0.116458	0.116458	0.117421	0.117421	0.117421	0.115496	0.115496	0.115496
	5	0.119346	0.118383	0.117421	0.116458	0.116458	0.116458	0.116458	0.116458	0.115496	0.116458	0.118383	0.117421	0.115496	0.114533	0.115496	0.116458	0.116458
	6	0.118383	0.118383	0.117421	0.116458	0.116458	0.116458	0.116458	0.115496	0.115496	0.115496	0.115496	0.116458	0.115496	0.114533	0.115496	0.115496	0.116458
	7	0.118383	0.118383	0.118383	0.116458	0.116458	0.115496	0.115496	0.115496	0.115496	0.115496	0.115496	0.115496	0.115496	0.115496	0.116458	0.116458	0.115496
	8	0.118383	0.118864	0.119346	0.117421	0.116458	0.115496	0.115496	0.115496	0.115496	0.116458	0.115496	0.115496	0.115496	0.115496	0.116458	0.115496	0.115496
	9	0.119346	0.119827	0.119346	0.118383	0.116939	0.116458	0.115496	0.115496	0.115496	0.116458	0.115496	0.116458	0.115496	0.116458	0.116458	0.115496	0.115496
	10	0.119346	0.119346	0.120308	0.119346	0.117421	0.116458	0.115496	0.115496	0.115496	0.117421	0.116458	0.117421	0.118383	0.117902	0.117421	0.115496	0.115496
	11	0.120308	0.119346	0.119346	0.118383	0.117421	0.115496	0.116458	0.116458	0.117421	0.117421	0.116458	0.118383	0.119346	0.118383	0.118383	0.117421
	12	0.119346	0.119346	0.119346	0.118383	0.118383	0.117421	0.117421	0.116458	0.117421	0.118383	0.119346	0.118383	0.119346	0.119346	0.119346
	13	0.119346	0.119346	0.119346	0.119346	0.119346	0.118383	0.117421	0.117421	0.117421	0.118383	0.118383	0.119346	0.120308
	14		0.118383	0.119346	0.119346	0.118383	0.120308	0.117421	0.117421	0.119346	0.119346	0.119346	0.119346	0.120308
	15			0.118383	0.119346	0.120308	0.120308	0.120308	0.12127	0.120789	0.12127	0.120308
	16				0.118383	0.119346	0.12127
	17					0.120308
4	1					0.119346	0.118383	0.119346	0.119346	0.120308	0.122233	0.120308	0.120308	0.119346					4																		4
	2					0.118383	0.118383	0.118383	0.118383	0.118383	0.12127	0.120308	0.120308	0.118383	0.118383
	3			0.117421	0.117421	0.117421	0.117421	0.117421	0.118383	0.118383	0.118383	0.118383	0.119346	0.118383	0.118383	0.117421
	4		0.118383	0.118383	0.117421	0.117421	0.117421	0.117902	0.118383	0.118383	0.118383	0.118383	0.118383	0.118383	0.117421	0.117421	0.118383
	5	0.12127	0.119346	0.118383	0.117421	0.117421	0.117421	0.118383	0.117421	0.117421	0.117421	0.118383	0.118383	0.118383	0.117421	0.116458	0.117421	0.118383
	6	0.120308	0.119346	0.118383	0.117421	0.117421	0.118383	0.117421	0.117421	0.117421	0.116458	0.117421	0.118383	0.117421	0.117421	0.117421	0.117421	0.118383
	7	0.119346	0.119346	0.119346	0.118383	0.118383	0.117421	0.117421	0.117421	0.117421	0.117421	0.117421	0.117421	0.117421	0.117421	0.117421	0.117421	0.118383
	8	0.120308	0.119346	0.119346	0.119346	0.118383	0.117421	0.117421	0.117421	0.117421	0.118383	0.117421	0.117421	0.117421	0.117421	0.119346	0.117421	0.118383
	9	0.119346	0.119346	0.120308	0.119346	0.118383	0.117421	0.117421	0.117421	0.117421	0.117421	0.117421	0.117421	0.118383	0.118383	0.118383	0.118383	0.118383
	10	0.119346	0.119346	0.120308	0.120308	0.118383	0.117421	0.117421	0.117421	0.117902	0.118383	0.118383	0.118383	0.120308	0.120308	0.118383	0.118383	0.118383
	11	0.120308	0.119346	0.119346	0.120308	0.119346	0.117421	0.117421	0.118383	0.118383	0.119346	0.119346	0.120308	0.12127	0.120308	0.119346	0.118383
	12	0.120308	0.120308	0.119346	0.119346	0.120308	0.119827	0.118383	0.118383	0.118383	0.120308	0.120308	0.120308	0.120308	0.12127	0.119346
	13	0.120308	0.120308	0.120308	0.119346	0.120308	0.120308	0.120308	0.119346	0.119346	0.120308	0.120308	0.119346	0.12127
	14		0.120308	0.120308	0.119346	0.119346	0.12127	0.119346	0.119346	0.12127	0.120308	0.120308	0.120308	0.12127
	15			0.120308	0.120308	0.120308	0.120308	0.12127	0.122233	0.12127	0.120308	0.120308
	16				0.119346	0.120308	0.120308
	17					0.12127
5	1					0.120308	0.119346	0.119346	0.119346	0.120308	0.120308	0.120308	0.118383	0.118383					5																		5
	2					0.119346	0.118383	0.118383	0.118383	0.118383	0.119346	0.119346	0.118383	0.117421	0.117421
	3			0.118383	0.117421	0.118383	0.117421	0.118383	0.118383	0.118383	0.117902	0.117421	0.117421	0.117421	0.117421	0.116458
	4		0.119346	0.117421	0.116458	0.117421	0.117421	0.117421	0.118383	0.117421	0.117421	0.117421	0.117421	0.117421	0.116458	0.116458	0.117421
	5	0.120308	0.119346	0.118383	0.117421	0.117421	0.117421	0.118383	0.118383	0.118383	0.118383	0.118383	0.118383	0.117421	0.116458	0.116458	0.116458	0.118383
	6	0.119346	0.119346	0.119346	0.117421	0.117421	0.117421	0.118383	0.117421	0.117421	0.117421	0.116458	0.117421	0.117421	0.116458	0.116458	0.116458	0.117421
	7	0.119346	0.119346	0.120308	0.118383	0.118383	0.118383	0.117421	0.117421	0.117421	0.116458	0.117421	0.117421	0.116458	0.116458	0.116458	0.117421	0.116458
	8	0.119346	0.119346	0.120308	0.119346	0.118383	0.117421	0.118383	0.117421	0.118383	0.117421	0.117421	0.117421	0.117421	0.116458	0.118383	0.117421	0.117421
	9	0.120308	0.120308	0.120308	0.119346	0.118383	0.117421	0.117421	0.117421	0.117421	0.118383	0.117421	0.117421	0.117421	0.118383	0.117421	0.117421	0.117421
	10	0.120308	0.120308	0.120308	0.120308	0.119346	0.117421	0.117421	0.117421	0.118383	0.119346	0.118383	0.118383	0.120308	0.119827	0.118383	0.117421	0.117421
	11	0.120308	0.120308	0.119346	0.120308	0.119346	0.118383	0.117421	0.118383	0.119346	0.119346	0.119346	0.119346	0.12127	0.120308	0.12127	0.120308
	12	0.120308	0.120308	0.119346	0.119346	0.120308	0.118383	0.119346	0.119346	0.119346	0.120308	0.120308	0.120308	0.120308	0.12127	0.122233
	13	0.120308	0.120308	0.120308	0.119346	0.120308	0.120308	0.119346	0.118383	0.119346	0.120308	0.120308	0.120308	0.12127
	14		0.120308	0.120308	0.120308	0.119346	0.120308	0.119346	0.118383	0.120789	0.120308	0.120308	0.119346	0.120308
	15			0.120308	0.120308	0.120308	0.120308	0.120308	0.120308	0.12127	0.12127	0.120308
	16				0.119346	0.120308	0.12127
	17					0.12127
6	1					0.12127	0.120308	0.12127	0.120308	0.122233	0.123195	0.120308	0.120308	0.120308					6																		6
	2					0.120308	0.120789	0.120308	0.119827	0.120308	0.120308	0.119346	0.119346	0.119346	0.119346
	3			0.120308	0.119346	0.119346	0.119346	0.119346	0.120308	0.119346	0.119346	0.118864	0.118383	0.119346	0.118383	0.118383
	4		0.12127	0.119346	0.118383	0.118383	0.119346	0.119346	0.119346	0.118383	0.118383	0.118383	0.119346	0.119346	0.118383	0.118383	0.119346
	5	0.123195	0.12127	0.119346	0.118383	0.118383	0.118383	0.119346	0.118383	0.118383	0.118383	0.119346	0.119346	0.118383	0.117421	0.118383	0.118383	0.118383
	6	0.12127	0.12127	0.120308	0.118383	0.118383	0.118383	0.118383	0.117421	0.118383	0.118383	0.118383	0.118383	0.118383	0.117421	0.118383	0.118383	0.119346
	7	0.120308	0.12127	0.12127	0.119346	0.118383	0.118383	0.118383	0.118383	0.118383	0.118383	0.117421	0.118383	0.118383	0.117421	0.118383	0.118383	0.118383
	8	0.12127	0.12127	0.122233	0.120308	0.118383	0.117421	0.118383	0.117902	0.118383	0.118383	0.118383	0.118383	0.117421	0.117421	0.119346	0.117421	0.118383
	9	0.12127	0.122233	0.122233	0.12127	0.119346	0.118383	0.118383	0.118383	0.118383	0.118383	0.118383	0.118383	0.118383	0.119346	0.119346	0.118383	0.118383
	10	0.12127	0.122233	0.122233	0.122233	0.120308	0.118383	0.118383	0.118383	0.119346	0.120308	0.119346	0.120308	0.12127	0.120308	0.119346	0.119346	0.118383
	11	0.12127	0.12127	0.12127	0.122233	0.12127	0.119346	0.119346	0.119346	0.119346	0.122233	0.12127	0.12127	0.122233	0.12127	0.122233	0.123195
	12	0.12127	0.12127	0.12127	0.12127	0.122233	0.12127	0.120308	0.120308	0.120308	0.123195	0.122233	0.122714	0.122233	0.123195	0.124158
	13	0.12127	0.122233	0.12127	0.12127	0.12127	0.122233	0.12127	0.12127	0.12127	0.123195	0.124158	0.123195	0.124158
	14		0.12127	0.12127	0.12127	0.12127	0.122233	0.120308	0.120308	0.12512	0.12512	0.12512	0.124158	0.12512
	15			0.122233	0.12127	0.122233	0.123195	0.123195	0.12512	0.124158	0.123195	0.12512
	16				0.12127	0.122233	0.124158
	17					0.122233
7	1					0.122233	0.120308	0.120308	0.119346	0.120308	0.12127	0.120308	0.120308	0.119346					7																		7
	2					0.120789	0.120308	0.119346	0.119346	0.119346	0.120308	0.120308	0.119827	0.118383	0.117421
	3			0.120308	0.119346	0.120308	0.119346	0.119346	0.119346	0.119346	0.119346	0.119346	0.119346	0.117421	0.117421	0.116458
	4		0.120308	0.119346	0.119346	0.118383	0.119346	0.118383	0.119346	0.118383	0.119346	0.119346	0.118383	0.117421	0.117421	0.116458	0.116458
	5	0.122233	0.12127	0.120308	0.119346	0.119346	0.118383	0.119346	0.118864	0.118383	0.118383	0.119346	0.118383	0.118383	0.116458	0.116458	0.117421	0.118383
	6	0.12127	0.12127	0.120308	0.119346	0.119346	0.118383	0.119346	0.118383	0.118383	0.118383	0.118383	0.118383	0.117421	0.116458	0.116458	0.117421	0.117421
	7	0.122233	0.12127	0.122233	0.119346	0.118383	0.118383	0.118383	0.118383	0.117902	0.117421	0.117421	0.117421	0.117421	0.116458	0.117421	0.117421	0.117421
	8	0.12127	0.122233	0.122233	0.120308	0.119346	0.118383	0.117421	0.117421	0.117421	0.118383	0.117421	0.117421	0.116458	0.116458	0.118383	0.117421	0.117421
	9	0.122233	0.122233	0.122233	0.12127	0.119346	0.118383	0.117421	0.117421	0.117421	0.118383	0.117421	0.117421	0.118383	0.118383	0.117421	0.117421	0.117421
	10	0.122233	0.122233	0.122233	0.122233	0.119346	0.118383	0.117902	0.117421	0.119346	0.119346	0.118383	0.119346	0.12127	0.119346	0.118383	0.118383	0.118383
	11	0.122233	0.122233	0.122233	0.122233	0.12127	0.119346	0.118383	0.118383	0.120308	0.119346	0.120308	0.120308	0.122233	0.12127	0.120308	0.118383
	12	0.123195	0.123195	0.12127	0.12127	0.12127	0.120308	0.120308	0.118383	0.119346	0.12127	0.12127	0.120308	0.12127	0.12127	0.122233
	13	0.123195	0.122233	0.122233	0.122233	0.122233	0.121752	0.120308	0.119346	0.120789	0.12127	0.12127	0.12127	0.12127
	14		0.123195	0.122233	0.122233	0.122233	0.123195	0.120308	0.119827	0.122714	0.122233	0.12127	0.123195	0.122233
	15			0.122233	0.122233	0.123195	0.124158	0.123195	0.123195	0.122233	0.122233	0.122233
	16				0.122233	0.122233	0.123195
	17					0.122233
8	1					0.12127	0.120308	0.12127	0.120308	0.12127	0.122233	0.120308	0.120308	0.119346					8																		8
	2					0.12127	0.120308	0.12127	0.120308	0.120308	0.12127	0.120308	0.120308	0.118383	0.119346
	3			0.12127	0.119346	0.119346	0.119346	0.119346	0.120308	0.120308	0.119346	0.119346	0.119346	0.119346	0.118383	0.117421
	4		0.122233	0.120308	0.119346	0.119346	0.118383	0.119346	0.119346	0.119346	0.119346	0.118864	0.119346	0.118383	0.118383	0.117421	0.118383
	5	0.123195	0.123195	0.120308	0.119346	0.118383	0.118383	0.119346	0.119346	0.119346	0.118383	0.119346	0.119346	0.119346	0.117421	0.117421	0.117421	0.119346
	6	0.123195	0.123195	0.12127	0.119346	0.119346	0.119346	0.119346	0.118383	0.118383	0.118383	0.118383	0.118383	0.118383	0.117421	0.117421	0.118383	0.118383
	7	0.123195	0.123195	0.123195	0.120308	0.119346	0.119346	0.118383	0.118383	0.118383	0.118383	0.118383	0.119346	0.118383	0.117421	0.117421	0.118383	0.118383
	8	0.123195	0.122233	0.124158	0.12127	0.119346	0.119346	0.119346	0.118383	0.118383	0.119346	0.118383	0.118383	0.118383	0.117421	0.119346	0.118383	0.118383
	9	0.123195	0.123195	0.123195	0.123195	0.120308	0.119346	0.119346	0.118383	0.118383	0.119346	0.118383	0.118383	0.118383	0.118383	0.119346	0.118383	0.118383
	10	0.123195	0.124158	0.124158	0.123195	0.120308	0.119346	0.119346	0.118383	0.119346	0.120308	0.119346	0.119346	0.12127	0.120308	0.119346	0.118383	0.118383
	11	0.123195	0.123195	0.124158	0.123195	0.122233	0.119346	0.119346	0.119346	0.120308	0.120308	0.120308	0.12127	0.122714	0.122233	0.120308	0.118383
	12	0.123195	0.123195	0.123195	0.123195	0.123195	0.120308	0.120308	0.119346	0.119346	0.12127	0.12127	0.12127	0.122233	0.123195	0.123195
	13	0.123195	0.123195	0.123195	0.123195	0.123195	0.122233	0.120308	0.120308	0.120308	0.122233	0.12127	0.122233	0.123677
	14		0.123195	0.123195	0.123195	0.122233	0.122233	0.120308	0.120308	0.122233	0.122233	0.122233	0.122233	0.12512
	15			0.123195	0.123195	0.123195	0.122233	0.123195	0.123195	0.122233	0.122233	0.123195
	16				0.123195	0.123677	0.124158
	17					0.124158
9	1					0.123195	0.122233	0.122233	0.12127	0.123195	0.124158	0.122233	0.122233	0.122233					9																		9
	2					0.12127	0.122233	0.122233	0.12127	0.12127	0.123195	0.122233	0.122233	0.12127	0.120308
	3			0.122233	0.12127	0.12127	0.12127	0.120308	0.120308	0.12127	0.12127	0.12127	0.12127	0.122233	0.120308	0.119346
	4		0.122233	0.120789	0.120308	0.120308	0.120308	0.120308	0.120308	0.12127	0.120308	0.12127	0.120308	0.12127	0.119346	0.119346	0.119346
	5	0.123195	0.122714	0.12127	0.120308	0.120308	0.120308	0.120308	0.120308	0.120308	0.120308	0.12127	0.120308	0.120308	0.119346	0.119346	0.119346	0.120308
	6	0.123195	0.123195	0.122233	0.120308	0.120308	0.120308	0.120308	0.119827	0.118864	0.119346	0.119346	0.119346	0.119346	0.119346	0.119346	0.119346	0.119346
	7	0.123195	0.122233	0.123195	0.12127	0.120308	0.119346	0.119346	0.119346	0.119346	0.119346	0.119346	0.119346	0.119346	0.119346	0.119346	0.119346	0.119346
	8	0.123195	0.123195	0.123195	0.12127	0.120308	0.119346	0.119346	0.119346	0.119346	0.120308	0.119827	0.119346	0.118383	0.119346	0.119346	0.119346	0.119346
	9	0.123195	0.123195	0.123195	0.122233	0.12127	0.119346	0.119346	0.119346	0.119346	0.120308	0.120308	0.119346	0.120308	0.120308	0.120308	0.119827	0.119346
	10	0.123195	0.122233	0.123195	0.123195	0.12127	0.119346	0.119346	0.119346	0.120308	0.120308	0.120308	0.120308	0.121752	0.121752	0.12127	0.120308	0.120308
	11	0.122233	0.122233	0.123195	0.123195	0.122233	0.120308	0.119346	0.119346	0.120308	0.12127	0.12127	0.12127	0.123195	0.123195	0.121752	0.12127
	12	0.123195	0.123195	0.122233	0.123195	0.124158	0.122233	0.12127	0.120308	0.120308	0.12127	0.12127	0.122233	0.122233	0.123195	0.12512
	13	0.123195	0.123195	0.123195	0.122233	0.123195	0.12127	0.12127	0.120308	0.12127	0.12127	0.121752	0.12127	0.123195
	14		0.123195	0.123195	0.123195	0.122714	0.123195	0.12127	0.12127	0.122233	0.12127	0.122233	0.122233	0.12512
	15			0.123195	0.123195	0.123195	0.124158	0.124158	0.12512	0.123195	0.122714	0.12127
	16				0.123195	0.123195	0.124158
	17					0.124158
10	1					0.12127	0.12127	0.12127	0.120308	0.120308	0.122233	0.12127	0.120308	0.120308					10																		10
	2					0.12127	0.120308	0.12127	0.119346	0.120308	0.120308	0.120308	0.120308	0.119346	0.119346
	3			0.120308	0.119827	0.120308	0.119346	0.120308	0.119346	0.120308	0.119346	0.119346	0.119346	0.118383	0.118383	0.117421
	4		0.12127	0.120308	0.119346	0.119346	0.119346	0.119346	0.119346	0.119346	0.119346	0.119346	0.119346	0.119346	0.118383	0.117421	0.118383
	5	0.123195	0.12127	0.120308	0.119346	0.119346	0.119346	0.118864	0.119346	0.119346	0.119346	0.119346	0.119346	0.118383	0.117421	0.117421	0.118383	0.119346
	6	0.122233	0.122233	0.12127	0.119346	0.119346	0.119346	0.119346	0.119346	0.118383	0.118383	0.118383	0.118383	0.118383	0.117421	0.117421	0.118383	0.118383
	7	0.12127	0.122233	0.122233	0.120308	0.119346	0.119346	0.118383	0.118383	0.118383	0.118383	0.117421	0.117421	0.118383	0.117902	0.117421	0.118383	0.118383
	8	0.122233	0.122714	0.123195	0.12127	0.119346	0.118383	0.118383	0.118383	0.118383	0.119346	0.119346	0.118383	0.118383	0.117421	0.118383	0.118383	0.118383
	9	0.123195	0.123195	0.124158	0.12127	0.120308	0.119346	0.118383	0.118383	0.118383	0.118383	0.118383	0.118383	0.118383	0.119346	0.119346	0.118383	0.118383
	10	0.122233	0.122233	0.123195	0.122233	0.120308	0.119346	0.118383	0.118383	0.119346	0.119346	0.119346	0.119346	0.12127	0.120308	0.119346	0.120308	0.119346
	11	0.12127	0.122233	0.122233	0.122233	0.122233	0.119346	0.119346	0.119346	0.119346	0.119346	0.119346	0.120308	0.12127	0.12127	0.12127	0.12127
	12	0.122233	0.122233	0.12127	0.122233	0.12127	0.120308	0.119346	0.119346	0.119346	0.120308	0.120308	0.12127	0.12127	0.122233	0.123677
	13	0.122233	0.122233	0.122233	0.122233	0.122233	0.12127	0.120308	0.119346	0.120308	0.12127	0.12127	0.12127	0.122714
	14		0.122233	0.122233	0.122233	0.122233	0.122233	0.120308	0.120308	0.12127	0.122233	0.123195	0.122233	0.124158
	15			0.122233	0.122233	0.122233	0.123195	0.124158	0.123195	0.124158	0.123195	0.124158
	16				0.122233	0.123195	0.124158
	17					0.124158

## Sheet: DISS
MaxDissociation
Signals of insufficient quality were excluded from the property maps. Signals could be rejected based on noise low amplitude, large artefact or ventricluar farfields that could not be substracted.
		1	2	3	4	5	6	7	8	9	10	11	12	13	14	15	16	17
1	1					22.3929	18.2446	15.9064	16.3153	21.7461	21.99	15.4111	15.2539	15.0607					1																		1
	2					24.728	21.7882	18.9748	18.9923	25.8733	25.2178	21.8639	18.5462	18.352	16.0234
	3			20.0717	21.583	22.1625	17.9748	18.4489	19.4151	24.0879	23.2893	20.3437	18.7524	18.7988	15.1111	12.9189
	4		18.7165	14.8143	11.6551	12.1988	14.7611	18.0963	18.5242	19.0505	18.1304	16.3891	16.5969	17.2456	14.314	12.3462	12.9497
	5	19.2628	23.8078	20.6622	11.2558	10.578	14.1002	18.1255	18.684	17.9575	18.9277	19.957	18.932	17.1219	13.6718	12.2342	13.1486	11.8716
	6	16.5446	24.0416	24.0699	15.8031	11.2004	14.1098	15.9884	17.476	17.0958	19.3589	20.1324	18.3942	15.5761	12.8061	11.8177	13.578	11.249
	7	13.5208	23.2589	25.6145	20.4147	12.8494	13.2351	14.7206	15.4731	17.6192	17.1291	16.9788	15.2832	13.0115	12.2115	13.6948	12.8748	9.2907
	8	15.5089	21.7787	25.8166	22.1051	14.3738	13.2673	13.8676	14.1552	17.9175	19.2998	18.8337	16.8395	14.6012	13.3096	13.9961	12.626	8.17087
	9	19.8323	23.7016	26.7505	24.7715	16.8585	14.1255	13.7006	14.0575	21.3565	23.3236	19.6705	17.5534	15.911	15.089	14.9961	11.407	7.1751
	10	20.3353	24.8413	27.2574	28.692	23.9728	16.8577	14.4558	16.4865	24.4449	26.334	20.6066	16.3236	16.7598	16.4715	15.9355	13.532	10.4319
	11	16.3274	22.6287	27.2697	27.8416	28.4058	22.0542	18.5888	18.0809	23.3211	25.271	16.9569	15.4083	16.3202	17.1529	16.1437	19.5804
	12	15.2282	18.2713	20.2888	25.2392	30.5961	29.4155	22.4796	20.2655	21.7329	22.7126	15.935	15.9586	14.4597	14.8071	12.2095
	13	11.892	16.7525	17.1358	20.9706	27.6786	28.8166	23.5911	20.9049	22.1742	22.7826	16.9289	16.3674	14.1775
	14		12.9684	15.2747	16.815	24.3543	28.256	22.07	19.4086	20.6673	18.7663	15.1024	14.7219	10.6687
	15			12.4317	14.6792	22.5817	27.2209	21.4597	16.4387	15.9306	11.357	8.86561
	16				14.4941	20.4218	24.296
	17					17.8935
2	1					27.7154	17.4167	15.8056	15.8757	19.9563	20.7103	16.2332	14	13.6641					2																		2
	2					28.568	20.4201	19	18.389	23.2297	23.0632	20.0771	16.8809	17.0176	15.3294
	3			23.6575	25.7871	25.7828	16.6953	17.2431	17.7471	21.6725	21.4932	17.705	16.055	17.6316	15.3191	13.089
	4		19.0902	14.8647	12.0253	12.1855	14.3789	16.0626	16.9162	16.6953	18.4188	16.1255	16.2967	16.501	14.0909	12.1219	12.4922
	5	19.234	22.9091	20.4618	11.9357	10.4327	13.0273	15.3821	15.1092	15.2074	18.2894	19.3718	18.051	16.3677	13.1586	12.0426	13.3114	12.0978
	6	15.9082	22.4091	23.115	15.3813	10.7617	12.4047	12.9008	13.3424	13.565	17.7791	18.4264	17.1592	14.0756	11.7118	12.1044	13.7466	11.5664
	7	13.643	22.4685	25.3608	19.6823	12.2179	11.3696	12.1961	12.1262	16.2354	18.3515	17.9515	15.9942	12.6408	12.6415	14.0716	13.2752	9.72233
	8	16.0316	22.2998	26.4536	22.3843	14.3541	12.1226	11.1282	10.8194	17.1226	20.2588	19.9514	18.0252	15.688	14.1354	14.2816	12.8295	8.07573
	9	17.511	22.0559	26.672	25.8238	18.3157	11.7918	10.4533	11.1748	21.7763	23.6718	19.5828	17.5634	16.1492	16.0039	16.0019	12.1267	7.05058
	10	18.6238	23.11	25.4431	28.1168	23.8762	15.3521	12.6907	15.1012	24.5233	27.5656	20.6869	16.5303	17.5737	18.0559	17.2165	15.1309	11.6901
	11	15.7188	21.5694	24.278	28.9286	30.0848	22.3327	18.2451	17.2094	22.9119	25.0254	17.0314	15.1667	17.3593	17.98	16.761	20.2063
	12	14.514	17.954	21.1601	25.796	31.7917	29.9764	22.7084	19.7456	19.9	21.8317	15.4921	16.022	15.8822	16.2295	12.7675
	13	10.8187	16.0219	17.9821	22.1913	29.2052	31.5822	23.6582	20.1859	20.778	22.9641	17.93	17.7331	16.1213
	14		12.2988	15.7913	18.5933	25.9109	29.9843	22.9902	19.7055	21.0916	20.4232	16.4709	15.388	11.1988
	15			12.9641	16.2715	24.0402	28.2147	20.7229	15.744	15.3267	11.692	10.2932
	16				16.016	22.6827	24.996
	17					19.6204
3	1					29.1594	19	17.9921	18.0433	20.7273	20.92	14.9941	14.8294	14.428					3																		3
	2					29.7039	21.4656	21.075	20.6016	23.0961	23.1275	20.6503	17.3099	17.6332	16.7162
	3			24.2838	25.9279	26.9961	18.5322	19.1748	19.7505	21.5953	20.7271	18.0097	16.6944	17.4286	16.473	14.9866
	4		19.1	16.7004	13.4932	13.2345	16.0658	18.4371	18.5504	16.8372	17.5456	16.8427	16.7229	17.3004	15.8478	14.2275	13.3243
	5	17.9167	22.5748	20.8317	14.5358	12.5453	15.056	17.8646	17.6441	15.4981	18.2843	19.4366	18.9107	18.2678	16.1054	14.021	14.0617	12.6602
	6	14.0217	21.7736	22.9686	17.8182	13.1721	14.4197	15.7021	15.4875	13.7466	18.1	19.2046	18.5624	16.9502	14.3225	14.2581	14.5846	11.9845
	7	11.5365	20.931	25.0984	20.4366	14.4709	13.5833	14.6744	13.6654	17.5048	20.1011	20.1298	18.1128	15.72	15.4046	15.9265	14.3404	10.4258
	8	14.7061	20.8343	26.4163	24.6012	16.7949	13.9112	12.2462	11.9442	18.5969	22.5317	21.9312	19.9808	18.1839	16.4192	15.8996	13.8035	8.42278
	9	17.8785	21.9142	26.1769	26.3631	20.1984	14.5698	12.0751	11.8635	22.7462	25.1923	21.3135	18.3031	17.2046	17.5446	16.9112	12.0463	7.37066
	10	18.2016	22.1956	25.0741	28.2371	26.293	17.0581	12.7096	14.6008	24.2209	27.1434	20.9131	16.4873	18.2436	18.7417	17.6841	14.5861	11.2727
	11	17.0239	21.3386	23.3273	26.6587	29.3294	22.8779	16.4205	15.6822	22.5817	24.5058	17.6369	15.3831	17.389	18.7706	17.8078	21.1196
	12	14.3459	17.4371	18.1739	24.413	31.2709	30.2613	20.8672	18.8621	20.6128	22.3777	15.5127	16.2663	15.5624	15.831	13.2769
	13	10.7222	15.3617	15.7038	20.5613	28.9324	30.4	23.6189	21.2578	20.8669	21.5582	18.277	18.2016	16.0599
	14		12.4103	14.913	16.247	25.7022	30.7143	23.8454	21.0943	21.9401	19.994	16.666	15.9821	11.55
	15			12.249	15.5138	24.2715	29.232	23.1102	18.1776	17.3671	11.4746	9.95582
	16				16.2194	22.8862	26.538
	17					19.8124
4	1					27.0256	17.167	16.1124	17.4765	20.8549	21.294	14.2659	13.5988	14.5835					4																		4
	2					28.0765	19.336	18.9077	19.9123	24.302	23.9044	19.2306	16.8478	17.1294	15.572
	3			23.2745	25.1526	25.9746	15.5373	16.3223	18.2768	23.3738	21.332	18.4961	16.6582	17.4892	15.8134	12.6355
	4		18.2809	14.833	12.5098	12.5273	14.2961	16.5185	17.543	16.5793	15.8922	15.4803	15.9725	16.5255	14.5851	12.2651	12.9647
	5	18.07	22.0218	19.1882	12.6928	11.3327	13.499	16.0039	15.7765	14.5684	15.8496	17.3555	17.149	16.0824	13.3957	12.7626	14.0859	12.5799
	6	15.2655	21.9162	22.8546	16.4462	12.2529	12.8885	13.6738	13.8869	12.416	15.8633	16.9611	16.1686	14.3496	12.2261	12.7427	14.0801	11.8504
	7	11.5885	20.3685	23.5569	18.8055	13.5333	12.0097	12.1777	11.7719	16.3918	18.5272	18.5926	16.6784	13.7899	12.963	13.8772	13.3372	10.0922
	8	12.4751	17.5757	23.3904	21.4229	14.9902	12.6342	10.5039	10.4659	17.2339	20.7096	19.7821	18.0973	15.2749	13.8066	13.6445	12.5656	8.43922
	9	13.5905	17.1713	21.0558	22.7058	17.3346	12.3957	10.3482	10.7763	21.4883	23.6569	19.6595	16.8765	14.5647	14.0294	13.4902	11.0314	7.66863
	10	12.7495	16.0439	20.8534	24.4294	24.6745	16.7804	11.534	13.7471	22.638	26.0941	19.888	14.1654	15.7535	15.7456	15.2953	14.4735	11.451
	11	11.8393	15.3532	18.9183	24.739	27.3631	22.9061	16.9648	15.791	20.9096	23.6252	15.8209	14.2772	15.3888	17.0556	16.1131	21
	12	10.688	13.46	14.672	20.9821	29.4406	28.3062	21.1398	17.878	18.6607	20.5377	14.2885	14.7654	14.3134	14.26	12.3127
	13	9.33667	12.5482	13.2311	16.9861	26.1574	29.2375	22.252	20.069	19.8775	20.7952	17.8429	17.5822	15.739
	14		10.97	12.6733	14.0498	23.1753	28.1265	22.6488	19.0716	20.5453	19.3876	16.2088	16.0641	12.2254
	15			11.4012	13.6235	22.2052	27.1187	21.9192	15.9717	15.8508	10.5924	8.67409
	16				14.9562	20.9657	25.3482
	17					17.631
5	1					28.1149	17.834	17.4573	16.1443	19.9783	21.0697	15.7347	14.7882	13.8711					5																		5
	2					29.8189	21.202	19.9368	18.939	23.1555	23.2978	20.0178	17.274	16.8541	14.4677
	3			25.4303	26.3425	27.2573	17.9314	19.0333	19.8471	21.5431	20.391	17.6433	16.3535	17.0293	14.227	12.5789
	4		21.2669	18.9921	14.4677	13.5614	14.8121	18.3033	18.5049	18.9235	17.1211	16.2368	16.4401	16.0234	13.5703	11.7515	11.6503
	5	19.8594	25.9163	24.2554	15.4286	11.7168	15.0214	17.5695	19.0098	17.3529	18.0216	18.1902	17.3288	16.2651	13.9767	11.9767	12.6654	12.0316
	6	16.2271	25.2202	26.0514	19.5225	13.9216	15.0879	16.1882	17.5108	16.5176	17.4658	17.2749	16.3438	14.8845	11.8887	11.3957	13.3431	11.5385
	7	11.5229	22.33	27.7166	24.2588	17.2141	14.6888	15.3567	15.0195	17.3535	16.922	16.655	15.3977	12.7031	12.7871	13.5458	12.8596	9.78585
	8	12.4469	19.7237	27.1098	25.4215	19.5711	16.7407	14.5906	14.1331	17.8728	18.4621	17.7871	16.7188	15.0898	13.5312	13.4185	12.275	8.51081
	9	13.9701	18.338	24.3618	26.4411	21.9562	16.8602	14.0352	13.4355	20.7388	22.0705	18.3464	16.9902	15.3517	14.9371	14.9057	12.2318	7.78543
	10	14.239	18.4056	22.9257	27.006	27.3703	19.5664	12.9454	14.5341	20.8902	23.7604	18.7014	15.252	16.582	17.5269	17.2327	15.1522	11.8067
	11	13.4669	17.5589	21.342	26.9819	31.1663	25.102	17.2285	15.4479	19.9763	21.501	15.6489	14.9306	16.7088	19.498	17.4329	20.3772
	12	12.054	14.1058	14.7952	22.3479	31.1165	29.6515	20.6358	18.2411	18.8379	19.5169	14.6574	15.2684	15.6132	17.4329	13.0081
	13	9.75449	13.486	13.8008	16.5794	27.1238	29.1952	20.6686	19.6778	20.9624	20.9158	18.868	18.49	17.1158
	14		12.056	13.428	14.5438	24.6825	27.8795	21.1992	19.1067	19.9439	18.9779	17.493	17.512	13.0545
	15			12.4108	14.3014	23.326	27.0464	20.493	16.499	15.9516	10.5141	9.96371
	16				16.1182	21.837	24.3293
	17					19.1687
6	1					28.2621	18.0703	16.7818	14.784	19.7715	20.2727	14.8617	13.1643	12.5149					6																		6
	2					29.096	20.8229	20.002	18.2962	23.6793	22.6733	19.0119	16.0298	15.5913	13.9504
	3			25.487	26.4444	27.5567	18.2072	18.6394	18.992	21.6	20.0278	16.7307	15.2942	16.1074	14.6071	12.3425
	4		21.1992	18.4294	14.5771	14.3176	16.3004	18.0752	17.8594	16.8323	15.8481	15.0554	15.3141	15.5805	13.7411	12.3418	12.0931
	5	20.4649	25.2571	23.6508	15.5446	13.0394	15.0533	17.127	16.716	14.685	15.5941	16.0855	15.1968	15.4325	13.6055	12.1909	13.0668	11.8665
	6	15.7184	23.8679	25.5631	19.9232	14.1637	14.3505	14.6324	14.1811	12.146	14.7791	15.2174	14.7628	13.8439	11.5886	11.5039	13.3563	11.2012
	7	12.4575	22.0828	26.402	22.7817	15.6469	13.4704	12.8659	11.7953	15.8701	17.9448	17.9116	15.9941	13.0255	12.6181	12.9744	12.7205	9.87921
	8	14.8545	20.9067	25.7967	22.8293	16.6891	13.5354	10.7559	11.1925	17.2209	19.9469	19.0256	17.4644	15.3543	13.4508	12.8602	12.2776	8.92913
	9	15.8377	19.2336	24.2306	24.5556	19.5229	13.3609	10.712	11.2868	20.4587	24.081	20.7041	17.8713	16.2599	15.6382	15.1885	11.9328	8.72387
	10	15.2353	18.8862	22.6701	26.6903	25.67	17.4536	12.3933	14.1601	22.6409	27.1235	20.9722	16.6265	18.4686	18.1602	17.7928	16.4354	13.9466
	11	13.5386	17.6457	19.8623	25.9532	28.4534	23.7143	17.4277	16.1443	20.7873	23.7309	17.6331	15.4525	17.4257	19.8024	17.7714	21.5412
	12	12.7515	15.0427	15.0992	22.4381	30.1093	30.2238	22.0602	19.988	18.8878	20.913	16.5423	17.5112	17.0552	16.8668	13.1687
	13	10.8036	13.7256	14.1417	17.3859	25.747	28.2883	22.4049	21.3567	21.1075	21.6154	18.7041	19.271	17.701
	14		11.8806	13.747	14.8499	22.6485	27.668	22.839	20.3521	21.8045	20.418	16.7152	16.1732	13.8
	15			12.4919	14.6293	23.3902	27.8601	22.846	17.8592	18.2016	11.5512	9.0559
	16				14.9533	21.7556	25.2984
	17					18.1839
7	1					28.6875	17.4008	14.3068	14.3156	19.254	20.5273	14.8748	14.0258	14.1719					7																		7
	2					30.3034	19.6409	17.1842	16.6299	22.8839	23.2874	19.6195	17.0355	17.0312	15.3366
	3			26.2832	27.6012	28.0398	16.6891	16.1631	16.6974	21.053	20.7292	18.2008	16.7397	17.308	15.4102	13.1376
	4		21.432	17.8162	14.9366	14.1561	15.583	16.2417	16.1142	15.2264	15.804	15.4122	16.0137	15.9981	14.5302	12.3915	12.0684
	5	21.142	27.016	24.1697	15.6746	12.1423	14.0354	15.5187	16.4244	14.4497	15.8091	16.7073	15.6621	15.5781	13.9146	11.9592	12.7227	11.7081
	6	17.4266	25.1875	25.759	19.2036	12.4103	13.2925	14.2308	15.2412	13.7348	16.4361	15.5953	15.1196	14.2207	12.6163	12.1922	13.7554	11.2012
	7	13.0203	23.9858	27.0968	22.7117	14.5996	13.004	13.3373	13.7485	18.0176	18.6399	17.7087	16.0078	14.1072	14.0233	13.8129	13.4183	9.76125
	8	14.2242	20.9474	26.7642	24.9561	16.7361	14.1686	11.9723	13.2446	18.8806	19.9706	20.1018	18.4795	16.4551	14.8594	14.3039	12.7671	8.6908
	9	15.14	19.6653	25.2163	27.2141	19.71	13.9447	11.7255	13.3843	21.6431	23.4784	20.2087	17.9411	16.9213	16.3713	15.2294	12.2466	8.49705
	10	15.3895	20.168	24.5275	28.2316	26.28	18.3228	13.2986	15.3235	23.5098	26.4617	20.2525	15.7683	17.536	16.8433	16.6122	13.9094	10.9333
	11	15.3631	19.8992	23.1318	27.8846	30.9408	26.3268	17.2327	16.2569	21.0575	24.1285	16.9662	14.503	16.0984	17.7206	15.256	18.4209
	12	13.6755	17.9248	18.5051	24.7939	32.5899	31.0661	21.9641	19.2857	19.9643	20.5382	14.028	14.2676	14.4113	15.0802	12.5556
	13	10.5234	15.7363	17.0444	19.8866	29.1885	30.7697	22.6966	20.498	21.3307	21.2621	16.7702	15.4507	14.7556
	14		12.7128	15.17	16.9332	26.3831	29.0081	22.8515	20.6441	20.9959	18.3765	15.3119	14.4202	11.2102
	15			12.417	14.5202	23.7143	27.818	21.6162	16.5416	15.4869	11.1222	9.63489
	16				14.4097	21.1677	24.947
	17					17.8676
8	1					27.9618	17.988	15.7495	16.0299	19.1552	19.9435	14.3928	13.0159	12.9563					8																		8
	2					29.6874	20.253	19.012	18.9761	22.452	22.1908	18.7287	15.6151	15.9604	14.7648
	3			25.812	26.118	26.8247	17.2798	17.6103	18.214	20.8036	19.7089	15.9802	14.6317	15.4941	15.0609	12.8402
	4		20.3846	18.8323	14.1836	13.515	15.7095	16.6673	17.0375	15.8261	14.998	13.796	14.1723	15.065	13.8676	12.144	11.7881
	5	19.2505	24.0611	24.0882	15.3121	12.2425	14.1252	16.7129	16.6146	14.0476	15.3069	15.3757	14.4762	15.0672	13.778	12.2288	12.3996	11.1853
	6	13.7146	22.5	25.5694	20.0377	13.3149	14.253	14.6733	14.503	13.0891	15.4603	15.7154	15.0552	13.6937	12.4409	12.0551	12.689	10.7066
	7	10.5449	21.6933	26.8633	23.044	15.2798	13.903	13.5523	13.0791	16.2937	17.355	17.2297	15.5218	12.5523	12.5128	13.1719	12.6963	9.53846
	8	13.8878	19.5235	26.5926	25.8855	18.0557	14.1996	12.0396	11.8889	17.2361	19.1782	18.905	16.9248	14.6482	12.3069	12.8893	11.9941	8.25296
	9	14.8466	19.2556	24.8131	27.8737	22.0922	13.9404	11.3008	11.0895	19.6277	22.1545	18.5694	17.1047	15.1485	14.9248	14.332	11.3142	8.62253
	10	15.1145	18.8347	22.3642	28.1191	27.5832	17.1753	12.2068	13.7932	21.4254	24.3924	19.0895	15.1218	16.131	16.428	15.4484	14.3703	12.0477
	11	13.7239	17.655	20.6296	28.8548	31.055	23.4095	16.2744	15.3506	20.1617	22.3912	16.008	14.0343	15.0713	16.8623	14.8283	18.1138
	12	11.8712	15.5878	15.752	25.9897	34.0429	31.5252	21.3119	19.0378	17.994	18.8434	14.1714	14.4869	13.9838	14.189	11.0224
	13	9.86354	12.8673	14.4184	19.7628	29.6721	30.3333	22.9381	21.7764	20.6854	20.4433	16.6559	15.9919	14.5784
	14		11.1833	13.1813	15.3679	24.7388	28.897	22.712	21.3627	21.8563	19.364	16.5787	14.7169	10.7753
	15			11.5642	14.9918	24.249	27.1382	22.1077	18.773	16.7449	11.5175	10.577
	16				15.9571	23.5603	25.1196
	17					20.4581
9	1					28.5833	16.4057	14.3543	14.4919	18.7313	18.9004	13.0526	11.6802	11.1457					9																		9
	2					30.2505	18.5789	16.6336	16.9082	21.1586	19.6356	15.3434	13.5879	13.8024	13.3707
	3			27.5972	28.084	28.3353	15.506	15.284	16.642	19.1145	16.6922	13.4788	13.0382	14.8343	13.5803	11.5578
	4		20.2127	18.1904	14.496	13.4751	14.2395	15.749	16.248	15.1406	13.9499	13.0401	13.5382	14.2596	13.016	10.9841	10.4592
	5	15.4549	22.668	22.5101	15.5538	11.6727	12.8064	15.1328	15.624	13.852	14.59	14.9879	14.0988	13.6559	12.8904	10.8171	10.833	9.97996
	6	12.1612	21.2525	25.0344	18.8683	12.4124	12.829	13.51	13.994	12.8356	14.8012	15.1697	14.1733	12.6766	11.3167	11.0456	11.7435	9.87078
	7	10.7128	20.6721	26.8763	23.0423	13.696	11.6627	12.3683	12.1647	14.6508	15	14.8307	13.7789	11.2425	11.2266	12.0298	10.8847	8.11508
	8	11.8323	19.1673	26.5603	24.7298	17.2869	12.9149	10.6706	10.9484	15.7921	16.9143	16.8688	15.5529	13.5706	11.7396	11.6587	11.0655	8.27976
	9	12.4755	17.272	23.7392	25.8119	19.6613	12.9006	10.6825	11.0813	18.8433	20.4453	16.906	15.288	13.7896	13.112	12.5729	11.6148	8.52191
	10	11.9898	15.5531	20.5644	26	26.8652	17.3181	11.5757	12.8529	20.3273	23.0701	17.39	14.0321	15.004	15.0081	14.6747	13.884	11.4398
	11	11.1673	14.2286	18.6204	25.8816	29.3043	25.2954	16.1158	14.7689	18.7888	20.6841	14.7214	13.9355	14.8699	16.0547	15.2285	18.6915
	12	10.2061	12.5438	12.8676	21.4041	30.6037	29.4898	19.5363	17.986	17.3367	17.3609	13.6532	15.2247	14.2626	15.211	11.9817
	13	7.86151	11.4172	12.3218	15.1143	26.9327	28.3874	20.7632	20.739	20.6687	20.1374	18.2093	18.1321	17.0607
	14		10.0306	11.7659	12.5633	23.1365	26.2961	22.0946	21.7591	21.8569	19.9959	17.3813	16.917	13.3758
	15			10.1694	11.593	21.8814	25.8028	21.0411	18.0249	18.0554	11.8574	10.4756
	16				13.5419	20.5726	23.9156
	17					17.7397
10	1					26.3495	14.9256	14.4589	13.9504	17.1312	18.1169	14.1815	12.8992	13.2769					10																		10
	2					28.0302	17.8603	16.4471	15.833	19.99	19.7445	17.1836	15.4223	16.2749	14.5109
	3			24.3394	25.6139	26.1208	16.1166	15.8869	16.4693	17.5996	15.9641	14.5357	14.7381	16.4139	14.1069	11.4664
	4		19.6794	16.6501	13.8948	13.0238	14.5188	15.1806	14.9327	14.2857	13.2277	13.0437	14.6634	15.3281	12.5108	10.8008	10.8363
	5	17.5309	23.4442	22.3373	14.2	11.6146	13.2209	14.8856	14.2083	13.0574	13.6548	14.3182	14.2165	14.0807	12.1795	10.5306	11.5762	10.8611
	6	15.778	23.1222	25.2676	18.4314	11.7406	12.5582	13.0454	13.3188	12.3241	14.7053	14.4078	13.8307	12.5049	10.998	10.6272	12.498	10.4565
	7	12.1134	22.1559	26.3211	21.5199	13.4493	12.3964	12.4252	11.9606	15.8874	17.3071	17.0727	15.122	12.2055	11.6903	11.8639	11.2441	8.6166
	8	13.3992	19.9655	26.2526	24.5051	15.2495	12.2312	11.2525	10.8507	16.3945	18.7332	18.2079	16.4036	14.8221	12.6851	11.743	10.9545	8.22772
	9	15.2825	19.4309	25.1173	26.5894	18.9899	12.7381	11.3706	11.1572	20.0552	22.213	18.7343	17.2391	14.241	13.6076	13.3267	10.6203	7.86508
	10	14.2596	18.2825	23.0307	27.372	25.6278	17.2792	12.778	14.0789	21.2688	24.4119	19.2436	14.6667	15.3434	15.2184	14.526	13.1283	10.5221
	11	12.4776	16.8493	20.0407	27.8747	29.0286	22.8676	16.2579	15.4447	19.3683	22.0791	15.4325	14.1503	14.8898	16.8672	15.3481	18.3051
	12	11.0407	14.8374	16.7581	23.666	29.5447	27.98	19.8867	18.0573	17.666	18.5408	13.6794	14.0905	14.7816	14.854	11.8717
	13	8.5898	12.8163	14.7769	19.4483	26.9449	27.8036	20.998	21.5229	21.168	20.9432	18.2465	16.5423	15.4263
	14		11.3625	13.0203	15.0507	23.1242	26.3429	22.12	20.8765	21.4156	20.1475	17.1209	15.5314	11.4168
	15			11.057	13.4341	22.0982	26.0475	21.9753	18.334	16.6888	11.8012	9.82025
	16				13.645	19.709	23.3083
	17					17.2045

## Sheet: BT
NumberOfStartingPointsBT
Signals of insufficient quality were excluded from the property maps. Signals could be rejected based on noise low amplitude, large artefact or ventricluar farfields that could not be substracted. Breaktrough can only be identified if a contiguous circle of electrodes enclose the electrode of interest. Therefore electrodes at the border or around a missing electrodes are excluded.
	1	1	2	3	4	5	6	7	8	9	10	11	12	13	14	15	16	17
1	2																		1																		1
	3						11	5	7	4	11	6	4
	4						4	6	3	14	9	6	2	2
	5				0	1	1	3	6	3	5	3	3	6	0
	6			6	1	5	2	4	9	17	3	3	4	6	3	0
	7		15	9	7	4	1	4	3	7	1	3	2	1	4	0	2
	8		2	0	5	8	2	2	6	0	2	1	6	7	1	0	1
	9		4	5	6	5	4	2	5	11	5	1	2	1	5	3	1
	10		8	10	21	11	3	4	8	6	4	2	1	1	1	1	0
	11		8	17	5	9	9	5	6	7	9	6	0	4	1	3	0
	12		12	8	8	7	21	5	5	9	11	7	9	2	2	0	0
	13		2	5	11	6	5	6	15	4	1	8	11
	14			4	16	8	2	7	9	9	1
	15				10	13	10	13	7	12	9
	16					5
	17
	1
2	2																		2																		2
	3						11	3	3	6	11	7	2
	4						22	3	6	15	7	5	2	0
	5				0	1	0	2	10	6	3	3	0	5	4
	6			0	1	2	0	1	3	16	3	4	4	8	2	0
	7		16	10	5	0	0	5	4	10	0	0	1	2	9	0	3
	8		3	5	8	9	2	3	3	1	0	0	5	6	2	3	3
	9		3	8	6	4	3	1	3	6	3	4	0	2	0	0	2
	10		6	13	8	4	1	0	1	3	1	1	1	0	0	1	7
	11		12	22	5	3	3	2	1	4	5	3	4	5	0	1	0
	12		9	5	3	2	14	0	4	5	7	2	6	2	2	0	0
	13		1	7	6	11	3	4	9	0	2	9	8
	14			5	25	4	1	2	6	7	2
	15				3	14	14	13	5	6	4
	16					6
	17
	1
3	2																		3																		3
	3						17	2	3	4	7	9	2
	4						16	2	10	14	2	5	4	1
	5				1	3	0	1	10	5	1	2	2	3	3
	6			8	1	6	1	6	3	19	3	5	1	5	4	1
	7		15	11	2	3	2	1	7	11	3	2	5	4	7	0	2
	8		4	5	5	5	3	5	4	0	3	6	3	3	3	1	2
	9		4	6	2	7	3	4	10	7	8	5	2	2	3	1	0
	10		8	6	19	7	2	4	7	2	3	2	1	1	1	1	1
	11		9	15	6	4	7	3	3	1	2	2	3	1	1	0	0
	12		1	3	1	4	13	6	4	2	3	2	5	1	3	0	0
	13		2	6	14	6	6	7	7	2	4	1	4
	14			3	14	11	4	2	6	6	1
	15				3	18	12	13	8	3	6
	16					2
	17
	1
4	2																		4																		4
	3						11	2	4	6	14	4	2
	4						14	2	7	17	2	4	2	2
	5				3	2	1	2	8	4	2	2	2	2	1
	6			3	1	7	4	2	9	20	1	6	2	0	0	0
	7		7	12	6	3	1	0	3	4	3	1	1	4	6	0	4
	8		2	2	4	4	2	2	2	4	4	3	3	3	1	4	0
	9		4	2	3	5	2	6	3	2	4	4	0	0	1	3	1
	10		2	5	16	7	2	2	1	2	2	2	1	3	0	1	2
	11		3	7	3	6	5	8	2	8	3	3	1	8	0	0	0
	12		3	1	0	3	12	1	3	7	4	2	7	3	6	0	0
	13		1	2	4	9	8	4	8	2	4	6	6
	14			1	7	7	1	4	7	4	3
	15				4	12	9	10	7	3	5
	16					4
	17
	1
5	2																		5																		5
	3						20	4	6	7	16	9	1
	4						21	4	5	9	4	3	4	0
	5				0	1	2	2	6	1	4	2	1	2	1
	6			6	1	4	0	6	5	13	2	4	3	10	2	0
	7		9	13	1	1	4	5	3	8	3	2	4	6	10	2	0
	8		0	3	3	4	6	1	4	4	1	1	6	10	2	0	0
	9		1	6	5	4	5	5	7	16	5	4	0	1	1	0	0
	10		5	5	21	13	7	2	6	7	4	0	0	0	1	0	1
	11		6	20	10	9	11	8	8	10	2	2	3	5	1	5	0
	12		2	3	1	4	27	2	1	3	4	3	5	2	5	0	0
	13		2	5	2	6	6	5	8	3	4	3	7
	14			2	5	5	6	5	7	7	3
	15				3	11	9	14	4	6	4
	16					12
	17
	1
6	2																		6																		6
	3						12	3	8	4	8	7	1
	4						16	7	5	8	9	5	3	2
	5				4	6	6	2	3	6	3	1	0	2	2
	6			8	2	4	2	9	4	16	3	6	5	7	3	0
	7		10	20	7	1	1	2	4	5	2	1	5	1	7	1	1
	8		2	2	4	7	1	2	2	1	1	4	2	5	0	0	5
	9		3	6	1	4	2	0	4	8	1	2	0	2	1	0	2
	10		3	10	15	8	5	3	4	9	4	3	1	1	0	0	1
	11		5	16	10	3	5	2	3	6	7	2	5	2	2	3	0
	12		8	4	6	0	20	1	4	4	3	5	7	3	3	0	0
	13		0	2	2	8	10	9	6	4	5	5	1
	14			5	9	11	2	7	10	4	1
	15				2	19	9	9	7	5	2
	16					3
	17
	1
7	2																		7																		7
	3						11	6	3	8	18	4	4
	4						12	2	2	5	7	3	3	1
	5				2	5	5	4	5	5	1	0	1	6	0
	6			5	1	5	6	5	2	10	1	10	1	6	2	0
	7		10	8	5	4	3	1	2	1	1	1	4	4	2	0	1
	8		3	2	7	3	3	5	4	1	6	3	6	2	2	3	2
	9		4	7	2	3	3	5	6	1	3	2	4	5	7	0	2
	10		8	7	15	12	2	4	6	6	5	2	1	1	1	0	6
	11		5	14	8	5	8	9	7	6	8	0	2	3	3	1	0
	12		5	10	1	4	16	2	7	5	1	4	12	0	4	0	0
	13		0	7	7	8	6	6	5	1	3	3	5
	14			6	19	5	1	9	11	8	5
	15				8	12	9	15	6	7	5
	16					6
	17
	1
8	2																		8																		8
	3						7	4	3	1	9	8	4
	4						14	1	3	9	2	0	1	1
	5				0	1	3	1	11	4	2	1	0	3	0
	6			3	1	7	4	5	7	14	1	3	1	5	0	1
	7		16	9	4	5	3	2	7	1	0	0	2	1	1	1	4
	8		6	0	7	7	0	3	1	1	0	4	2	3	2	2	3
	9		5	3	8	3	7	1	2	8	4	2	0	1	1	0	2
	10		4	6	14	11	5	2	3	4	3	0	0	2	0	0	2
	11		12	21	7	4	7	3	1	2	5	3	1	0	2	4	0
	12		6	6	5	6	21	2	3	1	3	1	0	3	7	0	0
	13		4	6	3	8	5	9	6	2	2	5	2
	14			2	10	11	4	6	6	5	3
	15				4	22	16	19	2	4	6
	16					8
	17
	1
9	2																		9																		9
	3						10	2	2	3	6	6	1
	4						14	4	6	8	6	3	1	1
	5				1	2	2	4	5	3	1	2	0	4	0
	6			8	2	4	2	3	1	9	0	3	6	4	2	0
	7		14	21	6	3	2	1	1	1	0	1	4	5	7	1	0
	8		1	5	2	3	2	2	3	0	1	1	3	3	2	2	1
	9		5	2	6	4	2	1	2	1	1	3	2	3	1	1	0
	10		2	8	11	7	1	5	6	3	4	2	0	1	0	0	0
	11		2	15	8	4	8	7	2	5	3	1	0	2	2	1	0
	12		1	2	3	0	13	2	1	0	3	4	5	3	5	0	0
	13		0	5	6	10	3	4	6	2	1	1	7
	14			3	11	6	0	4	3	5	1
	15				7	14	3	3	2	7	5
	16					5
	17
	1
10	2																		10																		10
	3						12	3	3	3	9	6	4
	4						16	2	4	16	3	8	0	1
	5				1	0	2	3	7	3	2	0	1	3	0
	6			4	1	10	2	7	7	16	2	6	2	7	0	0
	7		11	16	4	1	2	4	2	1	2	1	2	5	8	0	0
	8		3	2	7	6	3	4	5	0	2	2	2	8	2	0	1
	9		4	4	4	8	3	2	2	4	3	2	1	3	2	1	0
	10		4	7	18	5	0	6	2	3	4	1	1	0	1	2	4
	11		5	18	8	6	3	4	4	6	4	4	1	2	3	2	0
	12		4	4	5	3	17	4	5	6	0	6	8	1	7	0	0
	13		1	10	5	13	6	10	4	1	3	3	5
	14			3	18	10	4	4	10	8	3
	15				5	13	14	18	9	4	5
	16					2
	17

## Sheet: FI
FractionationIndices
Signals of insufficient quality were excluded from the property maps. Signals could be rejected based on noise low amplitude, large artefacts or ventricluar farfields that could not be substracted. Fractionation index is particularly sensitive to noise. Therefore electrodes with substantial noise are more strictly excluded.
		1	2	3	4	5	6	7	8	9	10	11	12	13	14	15	16	17
1	1					2.20432	1.65949	1.53606	0.642166	1.94291	2.3513	1.1996	0.781496	1.36399					1																		1
	2					1.27593	1.81765	1.49126	0.921002	1.55361	1.6198	0.767258	0.97446	1.15474	1.11111
	3			1.38953	1.22587	1.38491	1.19417	0.932563	1.07915	1.31445	1.1165	1.04078	0.682785	1.06576	0.939571	0.637066
	4		2.6835	1.54932	0.531792	1.2027	0.930636	0.976879	1.20503	0.823301	0.867704	0.865759	0.75	1.22244	1.06783	0.428846	0.814313
	5	2.66996	2.31845	1.49421	1.02885	0.94605	0.687861	1.19884	0.7842	0.76834	1.53516	1.86328	1.72427	1.2766	0.65251	0.115163	0.588803	1.17121
	6	1.52871	1.69109	3.0932	1.51351	1.21773	0.865125	1.00963	0.786948	0.762452	1.25336	1.73321	1.5068	0.847784	0.24952	0.15547	0.816956	1.46887
	7	2.32079	1.64229	2.50489	1.7345	1.08301	1.00193	0.780347	0.880769	0.842308	1.06358	1.5896	1.29287	0.598077	0.651923	0.879079	0.815029	1.35465
	8	2.63116	2.49605	3.08481	1.99416	2.04239	1.06731	0.963532	0.944444	0.900192	1.38104	0.868472	0.914894	1.01349	0.559615	1.20309	0.848837	1.20349
	9	2.00197	1.98814	2.43564	2.1875	2.25388	1.23938	0.944338	1.20881	1.06358	1.75	2.23256	1.66602	1.46615	1.3675	1.50388	0.984496	0.706226
	10	1.90873	4.21825	3.80396	2.32554	1.86019	1.13846	1.03654	1.23269	1.86847	1.81942	1.0562	1.55039	2.06836	2.04912	2.125	1.88155	1.49222
	11	1.33135	1.65226	2.00197	2.28713	3.31068	1.88008	1.28185	1.42582	1.62669	1.73879	1.60861	1.68047	3.08448	2.21569	2.16339	1.95294
	12	0.728175	1.33663	1.9725	1.80196	2.34314	2.24466	1.85631	1.44961	1.32359	1.63386	1.82874	2.03156	2.05108	2.01575	1.81423
	13	0.394	0.720792	1.46654	1.4549	2.31746	2.76134	2.24419	1.92039	2.65362	2.54941	2.35573	1.94892	2.31953
	14		0.583004	1.58103	1.68504	2.33465	2.98214	2.34241	2.47082	2.47835	2.27327	2.04528	1.84024	1.71173
	15			1.38218	2.95842	3.56972	3.16667	2.98428	2.72781	2.25	2.63116	1.94862
	16				1.39723	2.20792	3.11976
	17					3.10059
2	1					1.91502	1.50992	1.54563	0.435897	1.73956	2.22736	1.40909	0.886497	1.24219					2																		2
	2					1.08087	1.48521	1.3189	0.831041	1.22178	1.47431	0.73913	1.00391	1.14648	1.15789
	3			1.45597	1.23242	1.24853	1.0332	1.03725	1.01373	1.07255	0.943249	0.90297	0.589391	1.26121	1	0.762089
	4		2.7	1.76471	0.861598	1.46484	1.06055	1.14677	0.818713	0.677734	0.882583	0.666667	0.711198	1.39181	1.20309	0.524178	0.896887
	5	2.672	2.40316	1.66732	1.20468	1.09552	0.8125	0.992203	0.460039	0.459883	1.25591	1.81996	1.74118	1.20817	0.767892	0.154739	0.640232	1.26419
	6	1.39321	1.59486	3.18519	1.44163	1.25195	0.70428	0.754864	0.416342	0.370874	1.02907	1.8469	1.48932	0.930233	0.336557	0.179884	0.87234	1.58984
	7	2.06706	1.54921	2.57255	1.78558	1.09922	0.7607	0.497087	0.520388	0.525292	1.09903	2.21165	1.52326	0.8	0.792636	1.01161	0.963178	1.39223
	8	2.19132	2.46746	3.01183	2.0451	1.99611	0.947471	0.733981	0.537864	0.871595	1.82879	1.32296	1.39147	1.19961	0.584139	1.37864	0.875969	1.10291
	9	1.73852	1.91816	2.37575	2.26535	2.37647	1.11089	0.762646	0.875728	1.06031	2.12427	2.49513	1.85185	1.63178	1.70817	1.65302	1.11696	0.715953
	10	1.57426	3.944	3.80894	2.4099	1.89391	1.20039	0.978599	1.31907	1.90856	2.01174	1.10372	1.61252	2.13546	2.18962	2.15354	1.97852	1.50682
	11	1.01782	1.4127	2.162	2.29762	3.77515	1.92996	1.32879	1.49511	1.56947	1.81409	1.61765	1.75595	3.19361	2.37525	2.2012	1.99008
	12	0.71	1.278	2.21739	1.90099	2.48611	2.27701	1.80822	1.52055	1.40784	1.68713	1.77778	2.156	2.23553	2.17964	1.81
	13	0.424303	0.681909	1.52684	1.60355	2.50199	2.7703	2.30648	1.97065	2.60118	2.50699	2.306	2.09163	2.44334
	14		0.5	1.48111	1.7619	2.49209	2.98043	2.41732	2.6087	2.5259	2.32335	2.146	1.826	1.7495
	15			1.40837	2.88623	3.83133	3.00596	2.9739	2.73185	2.39078	2.634	1.9499
	16				1.48297	2.37952	3.15524
	17					3.21385
3	1					2.07283	1.58858	1.79167	0.57874	1.93874	2.246	1.14822	0.805882	1.30934					3																		3
	2					0.952941	1.65815	1.63708	1.1582	1.37843	1.54902	0.750491	0.94152	1.07722	1.15444
	3			1.94521	1.38012	1.41016	1.19103	1.29126	1.17934	1.107	1.00975	1.06238	0.547389	1.08687	1.01351	0.873805
	4		2.93333	2.05837	1.16311	1.50969	1.23404	1.29787	0.996124	0.827519	0.899029	0.782524	0.610465	1.38372	1.2158	0.629063	1.04633
	5	2.56746	2.46063	2.10568	1.3617	1.32755	1.00772	1.0735	0.649903	0.432432	1.18569	1.92788	1.72816	1.22158	0.917625	0.204589	0.749518	1.30097
	6	1.17589	1.50984	3.54902	1.94197	1.60735	0.905222	0.856867	0.466281	0.305182	1.03269	1.826	1.51056	0.923372	0.395038	0.246654	0.9	1.63883
	7	2.17949	1.55424	2.67913	2.03899	1.37209	1.10271	0.599229	0.373077	0.473988	1.05153	2.01145	1.5239	0.788571	0.885496	1.11992	0.973077	1.4104
	8	2.73964	2.71992	3.1992	2.27505	2.65234	1.07915	0.715385	0.457692	0.846449	1.74664	1.62715	1.44253	1.22797	0.665385	1.35907	0.842004	1.23552
	9	1.99602	2.05988	2.46123	2.27778	2.71513	1.27713	0.845857	0.944231	1.05	1.97308	2.42308	2.02896	1.70077	1.70736	1.55598	1.03475	0.669884
	10	1.92016	4.08982	3.83567	2.50797	1.91797	1.34496	0.976923	1.22265	1.78682	2.09302	1.12355	1.63743	2.19646	2.30528	2.30426	2.02515	1.59188
	11	1.22112	1.58218	2.16367	2.375	3.81262	1.80426	1.25775	1.39729	1.57977	1.89883	1.62524	1.7721	3.18271	2.43922	2.40588	2.01373
	12	0.813121	1.40719	2.13043	1.96047	2.43426	2.24951	1.68945	1.43301	1.44553	1.7456	1.82779	2.06903	2.18812	2.24254	2.00598
	13	0.386905	0.766798	1.61034	1.65217	2.36779	2.61569	2.25147	1.87891	2.59295	2.47535	2.27308	1.98814	2.53892
	14		0.692308	1.63439	1.79644	2.43393	3.08532	2.52446	2.5442	2.54491	2.318	2.17694	1.92829	1.74303
	15			1.53953	3.00198	3.91417	3.154	3.10822	2.78776	2.37525	2.73428	2.04418
	16				1.48419	2.46906	3.186
	17					3.2994
4	1					1.99408	1.43418	1.72584	0.580392	1.90457	2.26	1.33532	0.839921	1.24754					4																		4
	2					1.02745	1.46169	1.44794	1	1.43922	1.58167	0.707753	1.04941	1.14314	1.09073
	3			1.64314	1.36008	1.36595	1.05294	1.09375	1.14035	1.19765	1.04519	0.984252	0.563851	1.31507	1.0275	0.94152
	4		2.64047	1.7721	1.08594	1.54492	1.11569	1.1423	0.988281	0.765166	0.770588	0.724409	0.656189	1.40392	1.30137	0.651072	0.972549
	5	2.638	2.28571	1.85098	1.38356	1.35421	1.03914	0.97456	0.607843	0.470703	1.0625	1.81641	1.63137	1.15686	0.881092	0.241245	0.636719	1.357
	6	1.16766	1.42914	3.25147	1.66928	1.50588	0.802348	0.779297	0.393762	0.300781	0.945312	1.81518	1.57255	0.845703	0.397661	0.216374	1.02344	1.68307
	7	1.71372	1.33466	2.44511	1.9332	1.34118	0.922027	0.482422	0.368421	0.463938	1.00389	2.25146	1.50682	0.715953	0.927875	1.11501	0.871345	1.35686
	8	1.69384	2.08367	2.96813	2.22925	2.26078	0.859922	0.63035	0.395712	0.736842	1.85185	1.44358	1.35214	1.26901	0.550781	1.25195	0.919765	1.19216
	9	1.19881	1.52988	2.19323	2.13121	2.43504	1.10136	0.682879	0.758755	0.958984	1.95322	2.34834	1.94118	1.68627	1.53033	1.46875	1.47544	0.692157
	10	1.17694	3.19361	3.27309	2.23062	1.74314	1.17059	0.912621	1.23541	1.80822	1.94118	1.06287	1.53937	2.10537	2.19329	2.18898	2.0943	1.63333
	11	0.660714	0.894841	1.51594	1.93028	3.46429	1.79256	1.19727	1.48828	1.60904	1.86982	1.57874	1.68119	3.14228	2.34921	2.2123	1.95678
	12	0.332	0.766	1.34592	1.43625	2.35412	2.19483	1.65748	1.49409	1.4359	1.70635	1.7668	1.97018	2.07784	2.074	1.92247
	13	0.210421	0.610442	1.17331	1.20278	2.17729	2.61277	2.22817	1.99014	2.51186	2.40557	2.28827	1.91089	2.3247
	14		0.498	1.27689	1.55578	2.21912	2.92369	2.39286	2.54871	2.4326	2.23246	2.05221	1.81162	1.69618
	15			1.41717	2.94622	3.60359	2.9336	2.96768	2.60808	2.20363	2.49598	1.9697
	16				1.20717	2.19556	2.90891
	17					2.88306
5	1					1.9802	1.51779	1.72366	0.418972	1.70356	2.23904	1.18416	0.733333	1.25146					5																		5
	2					0.836614	1.46863	1.46443	0.84252	1.29666	1.53452	0.745562	0.925636	1.06809	1.15656
	3			2.13556	1.65949	1.44834	0.998039	0.856863	0.994118	1.19804	1.08055	0.929825	0.585938	1.07031	1.09393	0.773879
	4		3.22112	2.60236	1.57926	1.43275	1.04697	0.996086	0.994083	0.852941	0.939453	0.818004	0.709804	1.33789	1.29102	0.516505	0.827112
	5	2.87776	2.81076	2.35248	1.44423	1.28125	0.916179	0.911937	0.64902	0.811765	1.40864	1.80784	1.79061	1.23197	0.842412	0.147573	0.526419	1.24063
	6	1.32072	1.54762	4.06324	2.27789	1.67647	0.875	0.803922	0.64775	0.554688	1.11546	1.69396	1.48438	0.917808	0.345703	0.138402	0.82846	1.57988
	7	1.52684	1.42942	2.96208	2.47843	1.84479	1.26419	0.859649	0.669922	0.695312	1.03509	1.50877	1.34113	0.705078	0.736328	0.935673	0.662768	1.51473
	8	1.51904	2.03976	3.38124	2.81909	3.58893	1.23977	0.910331	0.821918	0.796477	1.29903	1.02148	1.08008	1.04492	0.472656	1.08644	0.917485	1.40668
	9	1.04391	1.578	2.32207	2.58882	3.55578	1.65945	0.900391	1.08594	0.836257	1.69472	1.86106	1.55294	1.38703	1.30648	1.40864	1.20039	0.698819
	10	1.09761	3.03414	3.30924	2.48898	2.20594	1.54102	1.07797	1.20078	1.76275	1.69505	1.0334	1.4623	1.878	2.01198	2.01381	1.95455	1.58777
	11	0.733467	1.00399	1.61	2.13052	4.00401	1.76667	1.33594	1.38703	1.41815	1.55424	1.45759	1.6131	2.8253	2.20717	2.17435	1.84232
	12	0.412	0.966068	1.41551	1.54473	2.36345	2.28515	1.74213	1.37154	1.27866	1.43738	1.72112	1.81113	1.94389	2.06613	1.8004
	13	0.195609	0.672	1.20717	1.28571	2.20758	2.71912	2.12032	1.70727	2.49703	2.20842	2.106	1.7988	2.36527
	14		0.59	1.388	1.55777	2.16468	3.06024	2.27022	2.37352	2.38076	2.17671	2.05611	1.842	1.69355
	15			1.58517	2.87425	3.504	3.01613	2.76754	2.51911	2.10887	2.35484	1.94567
	16				1.49499	2.25352	2.89718
	17					3.05691
6	1					2.02414	1.34538	1.6101	0.502	1.72745	2.16532	1.28257	0.747495	1.20477					6																		6
	2					1.038	1.57746	1.33066	0.960239	1.28685	1.60359	0.72167	0.912698	1.14087	1.125
	3			2.08782	1.58135	1.38171	1.18127	1.06972	1.08748	1.12475	0.990079	0.988119	0.524851	1.31014	1.10913	1.05512
	4		3.09756	2.29026	1.42688	1.52268	1.16206	1.13663	0.89505	0.781065	0.952663	0.825743	0.66998	1.38569	1.35573	0.54224	0.910891
	5	2.75207	2.37449	2.31151	1.45743	1.47835	0.903353	0.857143	0.729783	0.527559	1.16832	1.66004	1.66402	1.23413	0.925049	0.192913	0.601179	1.35189
	6	1.18163	1.4878	3.86573	2.03543	1.67061	0.819802	0.749012	0.415354	0.323471	1.01972	1.72925	1.48221	0.91502	0.48622	0.143701	0.935039	1.69323
	7	1.76518	1.62828	2.72525	2.27976	1.6075	0.952569	0.593688	0.387795	0.525591	1.0927	1.82711	1.48134	0.805501	0.913386	0.960552	0.799213	1.30693
	8	2.0303	2.47262	3.10163	2.47791	2.7802	0.990157	0.687008	0.473477	0.816568	1.70079	1.38659	1.32806	1.32874	0.598425	1.15748	0.968504	1.19488
	9	1.21298	1.69672	2.35714	2.38788	3.05368	1.2426	0.717949	0.846758	0.933071	1.85178	2.27613	2.02574	1.73016	1.51292	1.39484	1.42688	0.710059
	10	1.357	3.77236	3.52546	2.38866	1.97614	1.35108	1.01976	1.15217	1.69246	1.86454	1.05567	1.62249	2.29006	2.35497	2.29084	2.1173	1.63636
	11	0.851626	1.24291	1.86842	2.11202	4.13158	1.68849	1.17426	1.45455	1.55666	1.78514	1.46573	1.60808	3.21181	2.49898	2.35714	1.99383
	12	0.490909	1.07724	1.66599	1.57809	2.37247	2.36089	1.82129	1.468	1.43086	1.60324	1.77823	2.03885	2.11861	2.19672	1.83951
	13	0.277328	0.77439	1.33401	1.33333	2.24696	2.77096	2.32794	1.96393	2.65314	2.36842	2.28163	2.09856	2.40741
	14		0.617409	1.41903	1.56998	2.1798	3.11405	2.41046	2.60161	2.61934	2.29508	2.15369	1.91753	1.6375
	15			1.50405	3.09572	3.75813	3.21605	2.98768	2.70807	2.24641	2.53783	1.95445
	16				1.41582	2.2444	3.18313
	17					2.9321
7	1					1.8246	1.52579	1.59163	0.455621	1.65873	2.17778	1.29821	0.732143	1.26482					7																		7
	2					0.776447	1.47222	1.27921	0.832677	1.12598	1.44711	0.792829	1.0355	1.27148	1.18591
	3			1.86139	1.45635	1.50298	1.06931	0.94499	0.923379	1.02554	0.960474	1.01181	0.626223	1.20858	1.09375	0.949612
	4		3.15	2.0336	1.14059	1.6502	1.16206	0.939096	0.826772	0.769685	0.843564	0.848126	0.671233	1.34698	1.28655	0.618217	0.873047
	5	3.09939	2.68537	2.1976	1.50296	1.35968	0.822835	0.796844	0.630648	0.544379	1.1122	1.62672	1.6	0.984375	0.918447	0.192233	0.642578	1.33531
	6	1.55131	1.88105	3.71486	1.86759	1.51874	0.721344	0.676529	0.476471	0.442043	1.02358	1.72495	1.33529	0.771484	0.437984	0.184466	1.00783	1.52663
	7	1.94118	1.66057	2.73387	2.12922	1.48323	0.954545	0.579882	0.559921	0.590998	1.12133	1.92717	1.41683	0.775828	0.825581	0.996101	0.782101	1.37182
	8	2.51111	2.46356	3.29268	2.43713	2.83333	1.21569	0.725296	0.555773	0.847358	1.6549	1.34247	1.35812	1.22266	0.591797	1.1902	0.872798	1.21526
	9	1.53955	1.93306	2.3449	2.30505	2.978	1.29447	0.819608	0.988235	0.968627	1.85882	2.16929	1.87623	1.62402	1.5167	1.32549	1.24462	0.732809
	10	1.50101	3.83198	3.74542	2.36475	2.094	1.38976	0.992141	1.30588	1.79528	1.86051	1.07101	1.58218	2.07	2.11706	2.12795	1.96457	1.63333
	11	1.09533	1.49194	2.16836	2.2753	3.97347	1.74606	1.286	1.44071	1.53571	1.74901	1.57455	1.71058	3.07631	2.27944	2.16667	1.85996
	12	0.630612	1.39228	2.38586	1.9798	2.46263	2.2505	1.70717	1.38492	1.42063	1.5261	1.71	1.98793	2.10484	2.11824	1.78831
	13	0.348269	0.752535	1.56653	1.78745	2.67623	2.73939	2.28543	1.93254	2.53307	2.25	2.23185	1.99195	2.31111
	14		0.747454	1.49595	1.76316	2.51008	3.15121	2.51089	2.50696	2.51329	2.19433	2.00604	1.84848	1.78049
	15			1.42105	3.12146	3.72653	3.21063	2.89091	2.67748	2.15354	2.57724	2.06897
	16				1.45436	2.14928	3.04888
	17					3.10183
8	1					1.91767	1.40239	1.61924	0.441118	1.7621	2.11492	1.17836	0.750996	1.25					8																		8
	2					0.883768	1.73108	1.52305	0.838645	1.182	1.45582	0.657426	0.819444	1.05149	1.17391
	3			2.162	1.742	1.51594	1.1369	0.984095	1.102	1.06151	0.887129	0.847222	0.457426	1.11067	1.0943	0.921105
	4		2.91296	2.35529	1.37325	1.56886	1.14229	1.06535	0.847826	0.713439	0.881423	0.720792	0.564356	1.16929	1.17194	0.538462	0.823762
	5	2.56468	2.51527	2.32665	1.47913	1.33996	0.984095	0.873267	0.616601	0.527778	1.05545	1.58648	1.35913	1.01383	0.823183	0.134122	0.588583	1.21116
	6	0.874743	1.22131	3.91147	2.17063	1.61584	0.79249	0.746535	0.491089	0.461386	1.01786	1.66601	1.31953	0.76087	0.356299	0.139764	0.952756	1.5509
	7	1.60612	1.4274	2.74082	2.24	1.56349	1.03762	0.599606	0.501976	0.585317	1.04734	1.7604	1.43849	0.690335	0.719921	1.05138	0.816568	1.357
	8	2.24898	2.53783	3.3107	2.47189	2.80119	1.13636	0.683168	0.507937	0.803571	1.56436	1.20198	1.17426	1.12451	0.534653	1.23715	0.869565	1.3498
	9	1.64008	1.74642	2.41684	2.50305	3.17234	1.22465	0.762948	0.892644	0.942574	1.80792	2.12897	1.73518	1.49505	1.41188	1.22925	1.36759	0.806324
	10	1.47035	3.79592	3.57613	2.41068	2.06012	1.28884	1.03181	1.14314	1.67992	1.76892	0.936382	1.53293	2.00605	2.152	2.05952	1.97426	1.68986
	11	1.04294	1.423	2.19959	2.34969	4.23625	1.67197	1.21074	1.38048	1.44511	1.65269	1.4491	1.59192	2.9389	2.26721	2.14172	1.76048
	12	0.629857	1.2102	2.45697	2.09671	2.65918	2.25553	1.76258	1.43141	1.30539	1.46185	1.63911	1.87879	2.01826	2.02642	1.72358
	13	0.283096	0.926531	1.46122	1.93661	2.87576	2.75758	2.23952	1.91218	2.35872	2.18623	2.04858	1.81579	2.23829
	14		0.670061	1.51935	1.85163	2.42041	3.25657	2.508	2.54509	2.47433	2.17382	1.97342	1.78208	1.59959
	15			1.39104	3.18776	4.37551	3.29878	3.02642	2.6544	2.23457	2.49487	1.88501
	16				1.48367	2.49489	3.24124
	17					3.21429
9	1					1.84959	1.40568	1.44737	0.447581	1.74545	2.13415	1.39271	0.682186	1.14372					9																		9
	2					0.824242	1.68826	1.31377	0.720559	1.10843	1.53036	0.557576	0.828283	1.05444	1.12625
	3			2.09312	1.59	1.52008	1.16466	0.86	0.892	0.923695	0.859155	0.941414	0.547284	1.06869	1	0.739044
	4		3.0184	2.33267	1.40239	1.4831	1.10579	0.976096	0.786	0.759036	0.821643	0.731463	0.596386	1.21529	1.216	0.38171	0.793241
	5	2.29098	2.15275	2.12298	1.29084	1.25549	0.842315	0.706237	0.628	0.632	1.136	1.59476	1.46976	0.947686	0.848606	0.0735586	0.481113	1.264
	6	0.738776	1.12424	3.7004	2.03194	1.4741	0.652087	0.613546	0.489066	0.479208	1.07952	1.63473	1.38446	0.780439	0.40239	0.0873016	0.870775	1.51491
	7	1.30754	1.33401	2.69777	2.12274	1.368	0.871032	0.526733	0.519841	0.628968	1.06151	1.48509	1.34661	0.693837	0.654076	0.980159	0.606362	1.37698
	8	1.65849	2.26327	3.30061	2.39718	2.56972	1.06139	0.722222	0.507937	0.841584	1.48207	1.19085	1.21756	1.07952	0.518887	1.08929	0.892857	1.25198
	9	1.03878	1.41718	2.29363	2.37832	3.00403	1.29423	0.722222	0.799603	0.894841	1.78728	1.996	1.696	1.49499	1.32	1.17166	1.35329	0.876494
	10	0.95082	3.14082	3.32106	2.23926	1.9497	1.3161	0.964143	1.18887	1.71058	1.7495	0.936	1.4489	2.00404	2.14141	2.15863	1.898	1.70683
	11	0.726531	1.18776	1.83265	2.12653	3.9432	1.72655	1.28942	1.47211	1.49203	1.67606	1.36273	1.5504	2.71951	2.23077	2.14629	1.90726
	12	0.269388	1.06721	1.98371	1.80816	2.55441	2.25407	1.76008	1.484	1.32465	1.4879	1.61492	1.84211	1.89697	1.94523	1.78049
	13	0.183299	0.644172	1.49287	1.50816	2.37959	2.63692	2.22672	1.80723	2.45455	2.1697	2.07847	1.80488	1.96761
	14		0.510204	1.40041	1.72653	2.44807	3.03043	2.47686	2.58097	2.4908	2.20325	2.00203	1.71255	1.59305
	15			1.32245	3.06531	3.35992	3.07724	2.98357	2.60996	2.20534	2.41955	1.8252
	16				1.43558	2.0184	3.08848
	17					3.00826
10	1					1.68283	1.42254	1.46894	0.40873	1.68588	2.04839	1.26815	0.697581	1.14741					10																		10
	2					0.762097	1.32335	1.35928	0.763419	0.912351	1.39321	0.630739	0.792829	1.05378	1.0396
	3			1.78313	1.42178	1.28515	0.966403	0.878968	0.861386	0.75498	0.579681	0.694444	0.448413	1.2198	1.03366	0.835968
	4		2.90726	1.95626	1.07738	1.47222	1.10099	1.05357	0.60396	0.597222	0.706931	0.634195	0.516832	1.23715	1.25838	0.485207	0.769231
	5	2.60082	2.36511	2.13655	1.25149	1.26285	0.871795	0.516765	0.428571	0.30297	0.968254	1.37549	1.25197	0.915354	0.775148	0.128205	0.483168	1.25397
	6	0.96334	1.36049	3.41449	1.7674	1.31287	0.579882	0.416174	0.318812	0.233202	0.882122	1.62157	1.2185	0.708087	0.431953	0.136095	0.932806	1.44862
	7	1.95344	1.48988	2.62168	1.99203	1.3161	0.757396	0.356299	0.291339	0.385375	1.09252	1.71513	1.43307	0.652174	0.78501	0.822485	0.620079	1.37352
	8	2.08147	2.39351	3.06982	2.18384	2.48503	0.990119	0.566075	0.373281	0.773176	1.59289	1.19406	1.25646	1.05731	0.50297	0.940239	0.847525	1.28515
	9	1.60976	1.85163	2.2572	2.31504	2.66331	1.06548	0.656863	0.768173	0.913215	1.84024	1.95276	1.60277	1.54183	1.31076	1.18127	1.37376	0.736111
	10	1.45436	3.75407	3.45902	2.38618	1.98592	1.22772	0.915521	1.20907	1.68182	1.77228	0.89901	1.45509	1.94949	2.00802	1.988	1.92184	1.65261
	11	1.02642	1.38493	2.20732	2.29774	3.78367	1.66206	1.26389	1.39921	1.47723	1.6087	1.40278	1.56313	2.724	2.22736	2.07243	1.81212
	12	0.488798	1.19512	2.36179	2.10183	2.46545	2.154	1.60636	1.39723	1.30417	1.43141	1.68136	1.8672	1.92986	2.02231	1.71487
	13	0.265306	0.736735	1.58418	1.79108	2.66531	2.583	2.21042	1.93042	2.386	2.2211	2.11313	1.89113	2.21818
	14		0.635438	1.51829	1.84787	2.5947	3.08571	2.576	2.64575	2.45267	2.2623	2.05533	1.78093	1.64139
	15			1.48473	3.02434	3.59509	3.1281	2.93827	2.55394	2.11826	2.30738	1.88223
	16				1.32252	2.01639	3.00833
	17					2.85481

## Sheet: CV
MeanVelocity
Signals of insufficient quality were excluded from the property maps. Signals could be rejected based on noise low amplitude, large artefact or ventricluar farfields that could not be substracted.
		1	2	3	4	5	6	7	8	9	10	11	12	13	14	15	16	17
1	1					0.778696	0.693946	0.681277	0.624664	0.619541	0.604548	0.582234	0.615437	0.587937					1																		1
	2					0.892283	0.861247	0.798656	0.733469	0.723458	0.642073	0.597144	0.630639	0.646769	0.632946
	3			0.934292	0.893063	0.828152	0.859141	0.896016	0.869619	0.802534	0.662688	0.594452	0.618214	0.650554	0.66797	0.655676
	4		1.27947	1.05649	0.916	0.809293	0.809651	0.868251	0.953899	0.968053	0.674687	0.577132	0.592439	0.633996	0.6564	0.633502	0.580961
	5	1.25405	1.25678	1.10617	1.01375	0.935102	0.860829	0.813775	0.931658	1.00453	0.685072	0.582102	0.588822	0.634951	0.634977	0.647483	0.611625	0.600171
	6	1.11334	1.03812	1.12	1.09538	0.992674	0.871771	0.797029	0.785804	0.778371	0.608131	0.583706	0.606067	0.715202	0.699901	0.692904	0.619147	0.660118
	7	0.983586	0.966345	1.14361	1.13227	1.09068	0.908461	0.760278	0.720441	0.651887	0.572377	0.541048	0.596076	0.713818	0.738926	0.660021	0.599731	0.640462
	8	0.954934	0.967357	1.07244	1.18253	1.13487	0.96206	0.798944	0.716938	0.62983	0.535174	0.504956	0.549516	0.633588	0.666549	0.677576	0.677804	0.709436
	9	0.895982	0.903925	0.998522	1.11677	1.13566	1.01598	0.86317	0.722902	0.618046	0.520692	0.553056	0.613352	0.66406	0.767446	0.786576	0.771047	0.807785
	10	0.852843	0.87697	0.959879	1.00177	1.05924	0.933603	0.844112	0.70661	0.586272	0.576628	0.606768	0.782156	1.11761	1.24761	1.18832	1.19023	1.25545
	11	0.838439	0.824407	0.844945	0.922694	1.00166	0.842684	0.860404	0.740157	0.599597	0.657918	0.771845	1.11472	1.47743	1.5433	1.67973	1.79538
	12	0.769893	0.79026	0.836906	0.858716	0.982027	0.918518	0.905369	0.785992	0.714886	0.920559	1.08525	1.50157	1.83755	2.01063	2.11784
	13	0.732363	0.738115	0.845388	0.849937	0.906475	1.01772	0.954282	0.881706	0.95082	1.28261	1.42316	1.80912	2.08906
	14		0.823137	0.902669	0.896824	0.937838	1.20709	1.0352	1.11351	1.41175	1.62659	1.78793	2.06855	2.03915
	15			0.969752	0.951832	1.02611	1.34343	1.34222	1.6126	1.70331	1.92004	2.05219
	16				0.959606	0.982405	1.22014
	17					1.14862
2	1					1.07382	0.813979	0.745467	0.724358	0.70472	0.705944	0.610725	0.555826	0.578571					2																		2
	2					1.03862	0.964236	0.896277	0.824126	0.739403	0.665095	0.661546	0.59095	0.622377	0.633307
	3			0.979166	0.974927	0.930249	0.980052	0.974147	0.935731	0.85128	0.689288	0.621624	0.620698	0.635764	0.633291	0.633516
	4		1.15382	1.07334	0.942945	0.878197	0.858068	0.912628	1.09899	1.03141	0.692485	0.566935	0.575115	0.598325	0.644347	0.652487	0.586556
	5	1.23651	1.2003	1.11713	1.00234	0.92454	0.844509	0.874583	0.970075	1.03617	0.685305	0.549325	0.562785	0.647056	0.607364	0.613698	0.593908	0.564993
	6	1.10396	1.03119	1.21989	1.06008	1.03118	0.932236	0.849158	0.854405	0.765357	0.573505	0.522244	0.589173	0.676363	0.646883	0.59864	0.577322	0.586494
	7	1.06359	1.01386	1.19827	1.1551	1.12944	0.930354	0.845812	0.805809	0.663276	0.511348	0.478416	0.528617	0.653695	0.620305	0.608085	0.570357	0.594073
	8	1.0271	0.987101	1.10407	1.18365	1.14531	0.93877	0.812213	0.715374	0.586026	0.440459	0.426636	0.498511	0.549247	0.566636	0.625274	0.655045	0.723292
	9	0.931696	0.926373	1.00236	1.08838	1.05734	0.933219	0.809469	0.693543	0.52554	0.439975	0.46528	0.537617	0.603196	0.740901	0.788071	0.777172	0.85062
	10	0.840454	0.862149	0.909298	0.990316	0.981541	0.822972	0.723285	0.635155	0.512661	0.489665	0.553483	0.718865	1.08924	1.27691	1.28924	1.19832	1.24766
	11	0.758762	0.80829	0.860583	0.92701	0.98633	0.754837	0.725685	0.63672	0.51472	0.579688	0.72792	0.978967	1.51574	1.71541	1.76332	1.74515
	12	0.782652	0.802376	0.793598	0.808649	0.897645	0.8678	0.763943	0.663455	0.604211	0.826666	1.04779	1.36722	1.79994	2.1522	2.39188
	13	0.766426	0.760568	0.80285	0.869357	0.96295	0.976383	0.931095	0.845209	0.934125	1.19079	1.36747	1.76508	2.07218
	14		0.780342	0.8808	0.921163	0.887208	1.14816	1.09689	1.16775	1.39895	1.58835	1.8196	2.05208	2.06039
	15			0.910634	0.937755	1.05592	1.29178	1.32651	1.65367	1.71774	1.77995	2.02206
	16				0.987905	1.05424	1.32657
	17					1.1373
3	1					0.994682	0.835636	0.754634	0.702369	0.721385	0.652624	0.624258	0.574197	0.652876					3																		3
	2					1.01013	1.0023	0.894196	0.793744	0.79457	0.714712	0.633807	0.610702	0.607354	0.607861
	3			0.880318	0.847871	0.892045	0.975578	0.931078	0.930255	0.909325	0.743913	0.632363	0.61516	0.632711	0.61824	0.597637
	4		1.05108	0.985608	0.83565	0.796702	0.823401	0.858102	1.03609	1.09543	0.739595	0.5994	0.582913	0.601492	0.600635	0.566384	0.568379
	5	1.27505	1.08898	0.97061	0.86226	0.828572	0.774172	0.81348	0.967695	1.13528	0.737315	0.592014	0.56338	0.58948	0.55753	0.564398	0.592791	0.565846
	6	1.12986	0.979468	1.02193	0.951258	0.887449	0.838413	0.831544	0.902313	0.878671	0.624168	0.538214	0.545151	0.612774	0.599806	0.574481	0.573702	0.600962
	7	0.970464	0.963472	1.0656	1.0151	0.983869	0.930685	0.794281	0.81091	0.765351	0.55523	0.472564	0.503613	0.584355	0.593164	0.56654	0.562733	0.59337
	8	0.927627	0.9499	1.09325	1.10991	1.0075	0.89461	0.802055	0.765186	0.655777	0.484092	0.447612	0.479627	0.546722	0.562306	0.61335	0.637004	0.65901
	9	0.911406	0.948802	1.08265	1.07116	1.04822	0.93639	0.856905	0.751667	0.624543	0.493007	0.501772	0.54431	0.600048	0.695704	0.747636	0.760385	0.74134
	10	0.848484	0.896831	0.927362	1.00836	1.02554	0.876166	0.788089	0.704758	0.56576	0.517674	0.581977	0.729134	1.05364	1.17603	1.20232	1.14072	1.23618
	11	0.735893	0.821882	0.852022	0.893321	0.98891	0.789895	0.73479	0.679648	0.572492	0.631155	0.678067	0.91429	1.3978	1.66356	1.74536	1.80526
	12	0.684291	0.726362	0.768718	0.794453	0.91774	0.866397	0.827069	0.688292	0.621908	0.871899	1.00144	1.38579	1.73688	2.08235	2.19481
	13	0.669905	0.689042	0.780541	0.804678	0.89981	0.977334	0.939369	0.852102	0.909025	1.12538	1.12856	1.7601	2.00095
	14		0.728304	0.866054	0.884296	0.901812	1.15651	0.998202	1.07003	1.41704	1.54682	1.67018	1.96709	1.97227
	15			0.892973	0.991663	1.03086	1.34256	1.34926	1.66158	1.69784	1.90683	2.0467
	16				0.968967	1.03553	1.31446
	17					1.13802
4	1					1.05754	0.75548	0.682651	0.650916	0.672314	0.655124	0.61225	0.570361	0.571336					4																		4
	2					1.12791	1.0141	0.84008	0.80205	0.741457	0.688063	0.634857	0.59611	0.581868	0.617206
	3			0.932658	0.925026	0.932395	1.03013	0.997049	0.975286	0.861985	0.712722	0.612504	0.595097	0.612959	0.645506	0.621293
	4		1.04347	0.974192	0.858451	0.818284	0.860466	0.901118	1.14594	1.05083	0.710396	0.562442	0.561552	0.557675	0.607899	0.594613	0.588936
	5	1.29751	1.13261	1.05816	0.884272	0.866805	0.858499	0.890673	1.0025	1.09802	0.736263	0.584033	0.553629	0.570959	0.566529	0.59028	0.627664	0.579322
	6	1.1709	1.03863	1.08542	1.01007	0.947748	0.87349	0.857671	0.860685	0.78151	0.60855	0.524448	0.536967	0.592617	0.588721	0.56844	0.558278	0.599172
	7	1.04589	0.978788	1.11021	1.01895	1.05137	0.935748	0.825268	0.759474	0.710648	0.550684	0.488495	0.520815	0.584013	0.583324	0.55681	0.53739	0.547005
	8	0.9906	0.962365	1.07905	1.07155	1.18941	1.0063	0.833724	0.746591	0.631472	0.471091	0.436564	0.475934	0.529068	0.563328	0.646577	0.631506	0.653401
	9	0.892477	0.891211	1.04214	1.02567	1.09063	0.960696	0.816124	0.706102	0.570252	0.473061	0.464036	0.538245	0.625518	0.745508	0.754222	0.773112	0.756646
	10	0.830436	0.852272	0.896544	0.957065	0.997184	0.84261	0.750083	0.675224	0.547176	0.519361	0.584331	0.744987	1.06409	1.23037	1.22021	1.20113	1.09007
	11	0.816315	0.835556	0.863718	0.893465	0.97776	0.824982	0.790513	0.716982	0.590857	0.640169	0.746787	1.03885	1.43638	1.65707	1.72087	1.75396
	12	0.728459	0.777281	0.804937	0.819545	0.931882	0.909938	0.83515	0.739348	0.691226	0.884839	0.983815	1.43981	1.87952	2.07992	2.21768
	13	0.694421	0.756385	0.837358	0.811569	0.870306	1.06793	1.01857	0.969407	0.999345	1.27299	1.26049	1.58165	1.91666
	14		0.732331	0.859325	0.871352	0.825068	1.27369	1.03667	1.18173	1.46058	1.60306	1.64663	1.97436	1.9606
	15			0.876807	0.897866	0.988181	1.33986	1.40444	1.75952	1.86798	1.99322	1.9691
	16				0.880532	1.01394	1.37646
	17					1.09938
5	1					0.981633	0.843625	0.69398	0.68189	0.758056	0.679705	0.643115	0.59617	0.591636					5																		5
	2					0.963129	0.952052	0.822575	0.776279	0.792246	0.698699	0.659567	0.642147	0.651061	0.707724
	3			0.828282	0.823771	0.843145	0.922164	0.9229	0.926336	0.820754	0.706245	0.671317	0.651589	0.698948	0.701148	0.719016
	4		1.05118	0.879337	0.773916	0.734151	0.766815	0.791423	0.906926	0.875935	0.687733	0.614406	0.600939	0.655225	0.638609	0.643517	0.650076
	5	1.15235	1.06624	0.946857	0.793431	0.73809	0.746302	0.736359	0.822169	0.900952	0.687678	0.594776	0.604506	0.638529	0.628624	0.634996	0.633147	0.602242
	6	1.08763	0.978492	1.01878	0.842919	0.784396	0.750848	0.750132	0.773037	0.779105	0.641762	0.586291	0.598305	0.668758	0.708461	0.64942	0.615653	0.640059
	7	1.04745	0.954398	1.02773	0.930647	0.899954	0.77686	0.696327	0.71387	0.687872	0.607308	0.551305	0.586371	0.656002	0.712117	0.642753	0.598387	0.602305
	8	1.1224	1.03057	1.08631	0.98342	0.957468	0.808374	0.781667	0.741943	0.654967	0.588804	0.526283	0.564912	0.597603	0.671257	0.654513	0.657894	0.653478
	9	0.954022	0.985434	0.989937	1.03074	1.01207	0.931475	0.873605	0.761063	0.633004	0.570117	0.532835	0.599978	0.664864	0.764967	0.752111	0.76703	0.758633
	10	0.893174	0.872503	0.871898	0.968681	1.00209	0.885777	0.817587	0.714345	0.607651	0.57257	0.602853	0.733399	1.03446	1.16289	1.17857	1.18311	1.20057
	11	0.837637	0.82698	0.814465	0.824113	0.946151	0.767506	0.781356	0.746368	0.629132	0.67924	0.747068	0.994037	1.26051	1.4442	1.5865	1.80281
	12	0.695033	0.753008	0.776989	0.763999	0.851093	0.924708	0.871734	0.789321	0.696531	0.85835	0.961414	1.34431	1.63318	1.88148	2.0356
	13	0.674885	0.727639	0.801313	0.783106	0.824115	1.06953	0.911141	0.948793	1.05985	1.21475	1.26174	1.62097	1.8381
	14		0.739096	0.82575	0.798622	0.86017	1.14243	0.911983	1.09643	1.60166	1.72339	1.74584	1.9667	1.80409
	15			0.909837	0.822652	0.952912	1.19783	1.27529	1.68125	1.85975	2.08797	2.13151
	16				0.898742	0.996526	1.25027
	17					1.12123
6	1					1.03331	0.82912	0.743541	0.721593	0.708447	0.6169	0.574499	0.600866	0.605297					6																		6
	2					1.01896	0.991309	0.917531	0.819865	0.744331	0.62819	0.607191	0.590211	0.60662	0.5523
	3			0.842017	0.796376	0.85337	0.974559	1.0143	0.948949	0.826564	0.64445	0.579542	0.597154	0.588354	0.585271	0.600251
	4		1.04661	0.890527	0.80076	0.75693	0.783235	0.881186	1.11312	1.08856	0.679943	0.576776	0.582326	0.579974	0.592704	0.590328	0.57351
	5	1.22622	1.06764	0.933758	0.850632	0.786517	0.776383	0.788075	0.938062	1.05065	0.689409	0.566035	0.577457	0.573537	0.576783	0.590627	0.582311	0.573825
	6	1.09096	0.955001	0.980981	0.865624	0.872553	0.814068	0.764827	0.798248	0.774358	0.614272	0.545556	0.57615	0.642432	0.642847	0.613817	0.604408	0.612029
	7	1.01898	0.996105	1.08833	1.01512	0.985701	0.835306	0.760773	0.754771	0.700987	0.566111	0.522307	0.559633	0.602613	0.638187	0.635481	0.625126	0.637196
	8	0.959367	0.976018	1.06491	1.06795	1.03377	0.893471	0.813207	0.758584	0.670334	0.50688	0.471163	0.513325	0.564129	0.624737	0.673576	0.690036	0.718802
	9	0.895966	0.955039	1.06274	1.16586	1.04184	1.01635	0.899828	0.797032	0.652185	0.527519	0.486527	0.551841	0.628422	0.716772	0.777608	0.834821	0.790036
	10	0.891715	0.92374	1.00716	1.06738	0.981328	0.933636	0.861248	0.76592	0.591677	0.544621	0.58647	0.758507	1.0419	1.23497	1.16865	1.20525	1.21159
	11	0.834927	0.868094	0.876485	0.961292	0.969225	0.781809	0.748353	0.69951	0.584077	0.634737	0.74363	0.993048	1.51035	1.79588	1.74836	1.83155
	12	0.712435	0.790106	0.800716	0.844033	0.93646	0.901638	0.789457	0.778694	0.703906	0.946581	1.02515	1.53434	1.93696	2.25519	2.44787
	13	0.723809	0.767732	0.880234	0.882507	0.843459	0.933035	0.985868	0.941911	1.04689	1.22706	1.3408	1.758	2.21884
	14		0.775626	0.880603	0.878574	0.868061	1.13207	1.07277	1.14594	1.62182	1.72193	1.81566	2.18579	2.22897
	15			0.90151	0.937147	1.04295	1.192	1.39007	1.66083	1.82096	2.0921	2.11333
	16				0.930177	1.00921	1.20601
	17					1.09651
7	1					1.23888	0.909723	0.826528	0.770763	0.7081	0.717607	0.606412	0.573101	0.583405					7																		7
	2					1.13675	1.11736	0.966193	0.855057	0.780808	0.750574	0.659795	0.603271	0.594146	0.589238
	3			0.912034	0.966969	1.00254	1.11056	1.10109	1.03334	0.863962	0.735643	0.645928	0.625611	0.624563	0.62404	0.634285
	4		1.09911	0.90778	0.868872	0.891373	0.921286	0.935349	1.09935	1.04067	0.69609	0.60718	0.606944	0.584466	0.620534	0.627501	0.617838
	5	1.20152	1.13922	1.00222	0.888112	0.875864	0.851474	0.883548	0.964805	1.00947	0.71315	0.586824	0.5514	0.578922	0.59597	0.593117	0.606445	0.619267
	6	1.04221	1.06054	1.11703	0.976055	0.979157	0.917935	0.847262	0.824512	0.763247	0.599664	0.561867	0.580542	0.634656	0.599539	0.607486	0.597017	0.670397
	7	0.970488	0.988118	1.12605	1.10052	1.06315	0.973734	0.800985	0.739744	0.647303	0.542917	0.498722	0.532152	0.623985	0.619332	0.618832	0.630859	0.698809
	8	0.997013	1.00315	1.12708	1.11063	1.14777	0.958464	0.802556	0.696448	0.59624	0.512735	0.464515	0.481535	0.561737	0.630198	0.725514	0.725134	0.788254
	9	0.919838	0.972855	1.04715	1.05674	1.05179	0.929655	0.854833	0.689408	0.559266	0.526737	0.487532	0.551187	0.656101	0.760786	0.892382	0.8678	0.876603
	10	0.904659	0.956023	0.99522	0.974948	0.953711	0.857361	0.748443	0.665875	0.532824	0.567722	0.603249	0.760613	1.09269	1.23653	1.28586	1.34875	1.28849
	11	0.791708	0.867545	0.865489	0.889975	0.900091	0.757318	0.743893	0.672287	0.579721	0.665062	0.803708	1.11831	1.5804	1.73082	1.90004	1.96674
	12	0.733896	0.812187	0.812539	0.831546	0.919003	0.803961	0.755147	0.714183	0.661652	0.796482	1.02638	1.54543	1.93573	2.13663	2.53584
	13	0.713964	0.749836	0.872503	0.877728	0.950806	1.06627	1.06554	0.949491	1.02113	1.20835	1.43378	1.86625	2.12949
	14		0.796896	0.905168	0.926358	0.963198	1.14928	1.06131	1.13946	1.58556	1.6802	1.91623	2.19091	2.07614
	15			0.935646	0.999299	0.993835	1.26648	1.32394	1.63284	1.84973	2.0728	2.14868
	16				0.959095	1.05515	1.30627
	17					1.12747
8	1					1.01793	0.768996	0.663485	0.640425	0.668157	0.624064	0.623072	0.604325	0.62399					8																		8
	2					1.01324	0.93167	0.76905	0.738888	0.727532	0.687059	0.644703	0.635875	0.640838	0.635077
	3			0.830377	0.857482	0.84021	0.909968	0.885919	0.871971	0.818795	0.678004	0.644185	0.648538	0.672902	0.764233	0.669581
	4		1.0061	0.89075	0.804218	0.796631	0.816723	0.833988	1.05674	1.05559	0.725445	0.616867	0.632616	0.642597	0.701273	0.669784	0.648266
	5	1.2216	1.03118	0.926402	0.838789	0.827917	0.789715	0.8022	0.93673	1.04338	0.71711	0.629347	0.590146	0.613652	0.644546	0.63143	0.624516	0.618284
	6	1.07688	0.96229	0.968437	0.868569	0.877116	0.858353	0.801047	0.81909	0.789825	0.614344	0.584129	0.608134	0.64157	0.62064	0.605679	0.608978	0.630245
	7	0.932046	0.922439	0.997925	0.938492	0.988351	0.89252	0.78747	0.770293	0.672555	0.569474	0.536876	0.56503	0.630968	0.609074	0.61231	0.593979	0.60248
	8	0.888008	0.904547	0.943052	1.01116	1.08467	0.927223	0.855695	0.75559	0.627083	0.493189	0.476527	0.515054	0.550347	0.620729	0.656437	0.657881	0.688026
	9	0.947114	0.986681	1.01847	1.04443	0.993235	0.981254	0.883628	0.747185	0.646138	0.52051	0.519015	0.563792	0.654147	0.760056	0.731179	0.763247	0.800165
	10	0.831702	0.935779	0.965787	1.03331	1.01384	0.867849	0.775152	0.696237	0.592901	0.553964	0.607616	0.764963	1.03768	1.30858	1.28403	1.24804	1.24611
	11	0.779307	0.943228	0.907672	0.97067	0.993048	0.77928	0.75341	0.713463	0.598999	0.652607	0.733956	1.0252	1.54844	1.87581	1.89437	1.96039
	12	0.754616	0.858581	0.929377	0.929492	0.91893	0.887129	0.861659	0.736716	0.665828	0.896416	1.0163	1.45015	1.9399	2.21684	2.49041
	13	0.750806	0.829969	0.887831	0.987518	0.931712	1.12402	1.05153	0.906942	0.990033	1.16341	1.25224	1.73511	2.11539
	14		0.815956	0.964027	1.01214	0.93926	1.29474	1.07461	1.19338	1.50582	1.62893	1.81825	2.04295	2.10909
	15			0.942094	1.00757	1.18191	1.38878	1.56138	1.79744	1.73169	2.04809	2.1084
	16				0.917265	1.09813	1.53076
	17					1.17711
9	1					1.13948	0.803774	0.759576	0.740116	0.750033	0.708563	0.614336	0.630286	0.650134					9																		9
	2					1.09227	1.07105	0.867066	0.867036	0.792485	0.688656	0.63973	0.657214	0.660686	0.663885
	3			0.939777	0.895918	0.900397	0.955413	1.02948	0.984016	0.859478	0.714071	0.692728	0.693299	0.694396	0.713542	0.688604
	4		1.13241	0.934246	0.886143	0.811498	0.7951	0.870433	1.03357	0.992418	0.715322	0.648538	0.644907	0.643935	0.660819	0.648687	0.66059
	5	1.25965	1.12425	1.02087	0.930452	0.834538	0.781687	0.807731	0.872097	0.95233	0.71893	0.613296	0.643686	0.63716	0.619997	0.616756	0.634738	0.643558
	6	1.10157	0.995861	1.04002	0.984115	1.01153	0.847325	0.812748	0.777642	0.763688	0.618706	0.572454	0.638583	0.697947	0.654585	0.622465	0.614525	0.669136
	7	0.938468	0.908816	1.09435	1.09771	1.06634	0.877223	0.763327	0.725277	0.654099	0.574888	0.535004	0.574684	0.622665	0.637768	0.623153	0.603849	0.650167
	8	0.887567	0.948363	1.07529	1.0825	1.06284	0.92597	0.824969	0.725053	0.594629	0.539974	0.508983	0.512878	0.590703	0.645389	0.67824	0.673078	0.70121
	9	0.838675	0.893065	0.99417	1.02008	1.00974	0.921412	0.846239	0.71406	0.565993	0.523019	0.509258	0.574379	0.673999	0.837193	0.829422	0.791105	0.789547
	10	0.801839	0.826905	0.873029	0.930443	0.873739	0.819228	0.751407	0.656953	0.533428	0.521765	0.591197	0.729157	1.11003	1.32617	1.27802	1.30365	1.1658
	11	0.755786	0.80898	0.797627	0.803553	0.798108	0.704626	0.687135	0.648814	0.54259	0.617208	0.691654	0.990206	1.49357	1.67087	1.80748	1.91166
	12	0.673526	0.741941	0.760263	0.749022	0.838833	0.730872	0.697874	0.671174	0.681246	0.836137	0.975752	1.41142	1.87655	2.04082	2.29521
	13	0.673098	0.72013	0.805214	0.786235	0.873145	0.931472	0.850036	0.908832	1.00071	1.09874	1.23115	1.79454	2.14167
	14		0.732963	0.857082	0.856703	0.881396	1.02862	0.962458	1.24883	1.57333	1.59037	1.70537	2.10537	2.16627
	15			0.911455	0.868476	1.02236	1.1712	1.32882	1.79634	1.83257	2.01825	2.09799
	16				0.846475	0.913207	1.16609
	17					1.08496
10	1					1.23463	0.891871	0.7818	0.728101	0.759427	0.695716	0.614976	0.595735	0.595189					10																		10
	2					1.10357	1.13419	0.961824	0.838929	0.824533	0.704753	0.669381	0.625932	0.608086	0.594352
	3			0.969594	0.963079	0.961383	1.03237	1.06779	1.03077	0.954309	0.756425	0.68771	0.61704	0.641981	0.6367	0.681335
	4		1.09863	1.00258	0.928998	0.882926	0.870018	0.937228	1.17435	1.15455	0.806662	0.64618	0.620402	0.622073	0.653165	0.666207	0.604854
	5	1.23857	1.17374	1.0142	0.966232	0.932448	0.866518	0.836949	1.00344	1.07456	0.741656	0.613457	0.595049	0.602352	0.604882	0.603919	0.606637	0.616513
	6	1.16652	1.11347	1.09574	1.00546	0.987684	0.905228	0.836841	0.842519	0.781901	0.601106	0.5674	0.583358	0.687945	0.645644	0.613608	0.621848	0.702547
	7	1.02294	0.982884	1.128	1.04182	1.04557	0.946711	0.823839	0.773394	0.657644	0.528957	0.499686	0.536023	0.629684	0.674219	0.629626	0.655061	0.673211
	8	0.946717	0.950233	1.06464	1.03886	1.05823	0.930308	0.839068	0.731104	0.580675	0.484227	0.473298	0.515104	0.58226	0.657333	0.677083	0.733551	0.742064
	9	0.915692	0.941348	1.02565	1.05335	1.01	0.941838	0.849051	0.689341	0.554153	0.484989	0.49864	0.56032	0.64601	0.802115	0.857352	0.831113	0.841592
	10	0.829641	0.865644	0.8912	1.01948	0.990885	0.82917	0.834352	0.66474	0.553382	0.528614	0.613498	0.745335	1.11155	1.32983	1.3426	1.27295	1.32031
	11	0.764284	0.789403	0.79291	0.901189	0.923401	0.760254	0.727411	0.666876	0.570412	0.61325	0.776877	1.10278	1.54374	1.75461	1.85425	2.06011
	12	0.698193	0.749027	0.791676	0.828935	0.870313	0.803195	0.784235	0.678064	0.645281	0.809702	1.03478	1.50865	1.7867	2.1264	2.33453
	13	0.684183	0.719756	0.79328	0.810493	0.913498	0.925929	0.934743	0.921775	1.00619	1.13206	1.42724	1.85446	2.01709
	14		0.73897	0.833246	0.825644	0.847206	1.0002	0.936718	1.22672	1.59254	1.65693	1.87924	2.17757	2.06027
	15			0.954615	0.937802	1.02351	1.27309	1.31961	1.82156	1.86721	2.00257	2.2019
	16				0.897518	1.02342	1.20104
	17					1.10943

## Sheet: Pref
Preferentiality
Signals of insufficient quality were excluded from the property maps. Signals could be rejected based on noise low amplitude, large artefact or ventricluar farfields that could not be substracted.
		1	2	3	4	5	6	7	8	9	10	11	12	13	14	15	16	17
1	1					1.40696	1.73044	1.91723	2.10107	2.31441	2.264	2.21234	2.23874	2.6742					1																		1
	2				1.36501	1.58487	1.85105	2.40262	2.37704	2.60934	2.49595	2.67501	2.67548	2.98707	2.96026
	3			1.26058	1.37385	1.45854	1.39135	0.0306072	2.68359	2.74985	2.79395	2.8692	2.92581	0.0282603	0.0132416	2.90307
	4		0.770151	0.905568	0.938015	0.783773	2.90545	0.315496	0.521962	3.12285	2.99844	3.04706	3.10241	0.104306	2.9613	2.73956	2.81106
	5	2.56715	3.03799	0.406216	0.43979	0.352458	0.0935716	0.016415	0.01592	0.484097	0.091582	0.00357302	0.00852685	3.05109	2.87161	2.92186	3.00001	3.07365
	6	2.58599	2.84124	0.113513	0.269663	0.301912	0.0799569	0.0486023	0.452216	0.661372	0.345394	0.200661	0.213475	0.239837	0.210091	0.0991253	0.14265	0.183755
	7	2.66987	2.99773	0.110818	0.177853	0.213455	0.131596	0.00782302	0.768587	0.600213	0.399385	0.297106	0.486743	0.848274	0.702176	0.454371	0.409305	0.432952
	8	0.0342545	0.0108447	0.125729	0.285814	0.38911	0.306364	0.23321	0.652116	0.492168	0.47254	0.595202	1.07906	1.23552	0.923631	0.656575	0.547365	0.557451
	9	0.702375	0.543911	0.39709	0.478875	0.659994	0.687892	0.749218	0.717354	0.553855	0.52175	1.02184	1.45065	1.40635	1.07284	0.711026	0.488944	0.430905
	10	0.991924	0.981448	0.94462	0.890608	0.851697	0.841649	0.87845	0.809093	0.555322	0.519342	1.00038	1.58291	1.70947	1.35088	0.72798	0.486808	0.16533
	11	1.16184	1.183	1.18463	1.12781	1.07801	1.07281	1.00256	0.97819	0.71921	0.425215	0.351792	1.92082	2.05183	1.87074	1.3608	0.738895
	12	1.24577	1.21561	1.29054	1.4094	1.2592	1.15533	1.21533	1.06138	0.748558	0.260314	2.88539	2.40467	2.33311	2.16972	1.83114
	13	1.3822	1.32032	1.39121	1.61081	1.65074	1.5493	1.44492	1.23908	0.876035	0.383557	2.93402	2.34437	2.42374
	14		1.5083	1.59254	1.82285	2.01222	2.05231	1.81056	1.51922	1.7032	1.53329	2.30021	1.87092	1.20989
	15			1.84294	1.97592	2.11949	2.10421	1.9959	1.7242	1.81039	1.8107	1.81662
	16				1.97769	2.10947	1.73808
	17					2.0466
2	1					1.22382	2.02185	2.30711	2.39207	2.50098	2.37349	2.47005	2.53229	2.6362					2																		2
	2				1.48963	1.757	0.254808	2.84807	2.64299	2.67553	2.71488	2.87797	2.89884	3.00829	2.94545
	3			1.61494	2.14072	1.86755	0.320425	0.0484926	2.99972	2.88564	2.93114	3.0554	3.05708	0.0083303	3.10092	3.0264
	4		2.42903	1.88752	2.02065	1.92667	2.33765	0.553209	0.481421	0.253801	0.0548788	0.0950478	0.147077	0.144531	3.05238	2.95221	2.95817
	5	2.42379	2.73689	2.6381	2.47145	2.65513	2.74839	3.03234	1.27487	0.683896	0.367525	0.24342	0.208975	0.0992676	3.06096	3.03151	3.12503	0.0302798
	6	2.38097	2.74339	2.94091	2.89999	2.90147	2.83218	2.65676	1.22845	0.773397	0.517205	0.425259	0.386984	0.312824	0.217351	0.210799	0.231127	0.255821
	7	2.3786	2.8147	3.03517	3.10535	3.11344	2.97615	2.85938	1.10961	0.746394	0.580988	0.537259	0.648298	0.783003	0.6824	0.512204	0.464858	0.456581
	8	0.192808	0.0473092	0.101445	0.0757559	0.242491	0.19034	0.53254	0.982619	0.740868	0.613065	0.742861	1.03476	1.10199	0.902678	0.715701	0.611344	0.57703
	9	0.745027	0.616621	0.686074	0.662744	0.858595	0.838119	0.970647	0.882081	0.680866	0.649196	0.89243	1.22314	1.27678	1.02243	0.747652	0.572447	0.460742
	10	0.983464	1.07565	1.10953	1.06102	1.07524	0.997866	1.01261	0.860958	0.602302	0.586137	0.75242	1.23413	1.46646	1.14038	0.763687	0.511327	0.209194
	11	1.13874	1.17048	1.23567	1.10331	1.1407	1.09796	1.04771	0.888898	0.651033	0.490095	0.4705	0.971181	2.03942	1.6524	1.02446	0.638566
	12	1.29785	1.248	1.2916	1.25548	1.19557	1.12329	1.16959	0.946844	0.70626	0.3743	0.0303204	2.61555	2.41031	2.2177	1.672
	13	1.36454	1.33921	1.34289	1.33823	1.33859	1.15176	1.23824	1.02998	0.782194	0.282537	2.9642	2.54017	2.57983
	14		1.47371	1.53625	1.71317	1.88131	1.37401	1.39741	1.41014	1.5579	1.38893	3.03095	2.11474	1.02523
	15			1.73898	1.8786	2.06798	2.15074	1.75575	1.75805	1.777	1.83838	1.88737
	16				1.99912	2.10736	1.76239
	17					1.88615
3	1					1.1946	0.945652	0.0109337	2.328	2.20412	2.11289	2.3193	2.37338	2.77552					3																		3
	2				1.35251	1.35094	0.691078	0.229494	3.09842	2.69296	2.50381	2.72273	2.80902	2.99989	3.01247
	3			1.44055	1.99595	1.38101	0.81883	0.378957	0.280168	2.97498	2.79421	2.96021	3.0459	3.13342	3.11008	3.11672
	4		3.0019	1.21591	1.74199	1.38894	1.08648	0.797298	0.806642	0.545059	0.0317237	0.0509456	0.122985	0.122062	3.11607	3.08447	3.01007
	5	2.43073	3.14081	0.586928	0.917257	1.08032	1.21858	0.983359	1.28409	0.964175	0.455906	0.312181	0.195525	0.102675	0.0353217	0.0483889	0.070958	0.0676629
	6	2.47252	2.86803	3.08674	0.25457	0.526498	3.03472	1.88058	1.36825	0.973338	0.62	0.495742	0.440479	0.414396	0.32035	0.277233	0.266926	0.281685
	7	2.35549	2.82414	0.036845	0.339806	0.166044	2.85436	2.05183	1.38993	0.964188	0.655558	0.585715	0.733302	0.84613	0.706984	0.522542	0.478505	0.471159
	8	1.92425	0.1817	0.558716	0.557157	2.97368	2.58144	1.72886	1.30958	0.946963	0.719582	0.793484	1.10778	1.16422	0.90798	0.707752	0.605843	0.563415
	9	0.932929	0.676988	0.314685	0.688414	1.70896	1.4252	1.37816	1.11027	0.836696	0.714197	0.965395	1.30083	1.32448	1.06402	0.756102	0.584303	0.485732
	10	0.937655	1.0574	1.21622	1.23608	1.68735	1.4201	1.30571	1.02512	0.706315	0.588042	0.814365	1.30684	1.56089	1.22671	0.819862	0.529407	0.255946
	11	1.16206	1.21517	1.41716	1.3499	1.48679	1.45185	1.29215	0.992825	0.652128	0.474488	0.472978	1.32238	1.79806	1.66604	1.10464	0.664473
	12	1.27819	1.30033	1.36318	1.65419	1.43636	1.42662	1.30796	1.02476	0.732556	0.312252	3.1396	2.62883	2.41291	2.25522	1.6945
	13	1.53153	1.41942	1.42995	1.71776	1.74642	1.44999	1.43046	1.20473	0.862466	0.325291	3.06545	2.57982	2.50329
	14		1.62284	1.60361	1.91978	2.05982	2.22889	1.71949	1.4701	1.55048	1.20725	2.9282	2.68875	0.169319
	15			1.92444	2.05932	2.20592	2.38338	1.76316	1.68182	1.7382	1.70779	1.78176
	16				2.00923	2.03322	1.82682
	17					1.88661
4	1					1.22072	2.22293	2.30811	2.20601	2.25336	2.18447	2.26524	2.41714	2.69927					4																		4
	2				1.1049	1.5167	0.0961131	2.88271	2.4479	2.55411	2.52174	2.65361	2.72891	2.92233	2.91071
	3			1.36572	1.74536	1.43244	0.864036	0.4014	3.02875	2.79832	2.83784	2.96291	2.97022	2.98633	3.04247	3.06697
	4		1.09449	1.26638	1.42545	1.44313	1.30079	1.15249	0.857413	0.317422	0.0204718	0.0740914	0.0439681	3.13054	3.08724	3.08158	3.02127
	5	2.47392	0.529456	1.13072	1.33468	1.53204	1.47761	1.50728	1.30509	0.795897	0.398212	0.271072	0.168343	0.0876342	0.0293043	0.0125814	0.0634866	0.0621024
	6	2.53951	3.06889	0.379115	1.10936	1.37733	1.82586	1.97278	1.30616	0.885793	0.603695	0.500695	0.477611	0.393486	0.3149	0.264721	0.258046	0.258672
	7	2.75893	0.106947	0.500958	0.645762	0.861522	2.97345	2.04694	1.34826	0.871688	0.631082	0.57073	0.717225	0.825989	0.713555	0.510897	0.43467	0.422073
	8	0.333569	0.366342	0.490692	0.522059	0.571391	0.161201	1.77391	1.22854	0.89067	0.718749	0.798546	1.07894	1.17019	0.928501	0.694151	0.559565	0.493209
	9	0.755762	0.704746	0.794478	0.691684	1.02665	1.14582	1.24355	1.02256	0.80309	0.701174	0.944677	1.26574	1.33819	1.1129	0.753635	0.5248	0.370957
	10	0.880202	0.949344	1.0199	0.893009	1.14535	1.12748	1.14136	0.942681	0.66916	0.567412	0.784274	1.28282	1.57641	1.34159	0.831563	0.52642	0.218923
	11	1.05231	1.07229	1.11449	1.04761	1.1098	1.21107	1.15885	0.943772	0.645149	0.424948	0.374003	1.10401	1.87522	1.72905	1.15997	0.81187
	12	1.1556	1.17251	1.20063	1.1584	1.1251	1.15434	1.20426	0.943861	0.667756	0.247312	0.00567657	2.69288	2.37081	2.16451	1.57271
	13	1.26647	1.25357	1.27855	1.30784	1.20195	1.07942	1.12903	1.0538	0.793213	0.241822	3.04563	2.56489	2.28596
	14		1.36031	1.39822	1.45922	1.4296	1.1515	1.22362	1.31097	1.43252	1.08482	3.09662	2.28859	1.27955
	15			1.55227	1.57325	1.518	1.22456	1.27055	1.5022	1.64269	1.65431	1.60456
	16				1.74126	1.76436	1.41453
	17					1.78208
5	1					1.0357	1.85889	2.27267	2.18383	2.10448	2.23144	2.31399	2.39175	2.80974					5																		5
	2				1.1148	1.25777	0.805529	0.132016	2.57271	2.70187	2.53582	2.74959	2.89233	3.11657	3.02955
	3			1.5591	1.81356	1.43091	1.07934	0.638824	0.144189	2.85787	2.81531	3.02347	3.09878	0.0736186	3.11056	3.056
	4		1.62406	1.56128	1.62692	1.5037	1.37645	1.10264	0.976685	0.626121	0.167146	0.177925	0.237407	0.214711	3.04521	2.80837	2.89819
	5	2.27765	2.27917	1.60685	1.54932	1.42741	1.33624	1.18799	1.20368	0.971705	0.533725	0.347327	0.298593	0.177801	2.99984	2.92595	3.09831	0.00437754
	6	2.26744	2.47938	2.69317	1.8241	1.21332	1.13243	1.23376	1.26263	0.999446	0.692038	0.572425	0.539294	0.523023	0.370215	0.256012	0.213052	0.215678
	7	2.15844	2.51336	2.31676	1.29018	1.05508	1.03195	1.40947	1.29696	1.04201	0.69824	0.563698	0.798362	1.05934	0.909762	0.527637	0.437951	0.438166
	8	3.04052	2.98502	0.0254535	0.65349	1.09432	1.19325	1.45851	1.2475	1.03015	0.773832	0.866113	1.37194	1.4341	1.08744	0.711625	0.581165	0.511559
	9	0.742102	0.70376	0.658483	0.629808	1.29218	1.30635	1.23521	1.12612	0.867979	0.761056	1.1552	1.60773	1.61765	1.34772	0.782868	0.519015	0.402313
	10	0.901153	0.971335	1.0033	0.834146	1.31732	1.28706	1.25324	1.09728	0.749979	0.601801	1.16139	1.73036	1.90437	1.66066	0.896515	0.538701	0.201744
	11	1.05276	1.11615	1.15436	0.982102	1.10047	1.31681	1.29381	1.10873	0.777981	0.35372	2.91154	2.02269	2.10095	1.90108	1.5578	0.786176
	12	1.19057	1.18679	1.19344	1.11886	1.16257	1.42376	1.42914	1.18073	0.922976	0.0602828	2.8629	2.48282	2.36828	2.22805	2.12766
	13	1.2619	1.26388	1.24929	1.22055	1.09287	1.60493	1.78189	1.53618	1.39353	0.0278936	2.87295	2.50857	2.43876
	14		1.34682	1.39723	1.41295	1.40796	1.92977	2.02023	1.73349	1.77804	1.81977	2.8646	2.51013	2.20703
	15			1.51213	1.60569	1.59311	1.55803	2.00079	1.80773	1.91091	1.93993	1.86476
	16				1.75813	1.87534	1.29678
	17					1.68167
6	1					1.25881	1.50242	2.24523	2.12428	2.20206	2.27146	2.33482	2.40663	2.73696					6																		6
	2				0.939521	1.55643	0.677638	0.111375	2.36556	2.36923	2.56462	2.73887	2.77558	2.93472	3.0066
	3			1.54613	1.76292	1.48716	0.849625	0.379531	2.9951	2.70036	2.78682	2.91728	2.92578	3.04898	3.08827	3.11617
	4		1.20179	1.49468	1.6293	1.52476	1.45643	0.999297	0.653317	0.392121	0.0556712	0.0778436	0.0963432	0.0766512	3.11456	3.10199	3.04766
	5	2.34793	2.70416	1.15863	1.3752	1.47672	1.67834	1.44023	1.41925	0.896326	0.441737	0.26167	0.200591	0.112339	0.0612578	0.0248753	0.0363451	0.00476614
	6	2.28512	2.7112	2.39728	1.58509	1.72928	1.9838	1.69841	1.36805	0.935086	0.61642	0.487868	0.460537	0.423544	0.361975	0.266562	0.21797	0.192405
	7	2.07672	2.85991	0.0832251	2.83668	1.55906	2.09511	1.86172	1.33717	0.954298	0.683491	0.553731	0.72857	0.872819	0.734646	0.492373	0.40634	0.374682
	8	0.862951	0.650128	0.70946	0.67677	0.935261	1.27624	1.56143	1.24001	0.932332	0.74424	0.824799	1.13102	1.18453	0.960188	0.686265	0.545385	0.455189
	9	0.772443	0.785083	0.799186	0.782303	0.884047	1.1826	1.23731	1.07844	0.83506	0.743036	0.963329	1.28052	1.36254	1.15053	0.786482	0.557623	0.396334
	10	0.881701	0.968588	1.00825	1.09012	1.19468	1.18283	1.21561	1.0089	0.685392	0.584142	0.794525	1.23893	1.52683	1.3523	0.876135	0.595639	0.246915
	11	1.08841	1.09989	1.14815	1.16159	1.15432	1.27023	1.20358	1.05297	0.71532	0.469439	0.409072	0.894232	1.84049	1.75018	1.15932	0.844619
	12	1.18102	1.16057	1.23781	1.29887	1.21816	1.28592	1.2971	1.07841	0.754921	0.399495	0.0560227	2.83767	2.53237	2.33487	1.50616
	13	1.27765	1.26427	1.27863	1.3634	1.22156	1.36695	1.33748	1.20558	0.898793	0.466057	0.0105591	2.72776	2.53302
	14		1.31272	1.35359	1.46818	1.4224	1.54572	1.64404	1.42997	1.38748	0.911627	0.134807	2.71385	1.45525
	15			1.56628	1.58526	1.68053	1.60339	1.66965	1.59544	1.70817	1.67128	1.38589
	16				1.7784	1.72328	1.2619
	17					1.70231
7	1					1.16533	2.3369	2.37534	2.21144	2.24791	2.17763	2.31531	2.40772	2.58753					7																		7
	2				1.43714	1.28743	0.215939	2.83064	2.53382	2.52399	2.49991	2.63619	2.72225	2.8396	2.89785
	3			1.51451	1.63893	1.50795	0.957926	0.340975	2.97941	2.77857	2.7489	2.86903	2.87346	2.97729	3.01539	3.03731
	4		1.37364	1.52982	1.45827	1.39881	1.39072	1.0364	0.769035	0.419429	0.115541	0.0927954	0.0331767	0.0221096	3.05401	3.06371	3.05528
	5	2.25775	2.51263	1.62599	1.27276	1.28921	1.48508	1.48256	1.29866	0.851501	0.447747	0.324027	0.226698	0.0983447	0.0364378	0.052132	0.0948597	0.0739411
	6	2.31641	2.56532	2.16395	1.06824	1.2613	1.78965	1.55191	1.30303	0.890915	0.61702	0.554388	0.492172	0.438072	0.378843	0.30017	0.276681	0.270401
	7	2.24875	2.45187	2.81194	0.0246179	0.167501	3.04047	1.38959	1.27037	0.862103	0.68177	0.637513	0.78613	0.929298	0.73947	0.524483	0.452955	0.424619
	8	2.24627	2.7664	2.63762	0.14942	0.673473	0.859352	1.36152	1.10408	0.835727	0.722637	0.830695	1.14219	1.20852	0.950337	0.716826	0.589657	0.508417
	9	0.855822	0.852125	1.18614	1.29029	1.21259	1.08086	1.203	0.968231	0.736626	0.706374	0.930454	1.31326	1.37584	1.10085	0.763946	0.562005	0.410657
	10	0.960779	1.03486	1.29014	1.12523	1.34219	1.21379	1.16641	0.91851	0.666539	0.576523	0.788866	1.35362	1.60697	1.35359	0.833189	0.558609	0.249546
	11	1.10838	1.2139	1.29226	1.17413	1.31579	1.31173	1.22988	0.968672	0.697574	0.472049	0.4126	2.59	2.12618	1.91212	1.2224	0.714124
	12	1.24579	1.22102	1.32591	1.31051	1.36256	1.35351	1.30355	1.03111	0.741362	0.368443	0.0185334	2.75306	2.51181	2.41524	1.68822
	13	1.35924	1.31287	1.32044	1.40028	1.48953	1.46079	1.35823	1.17508	0.835139	0.421838	0.0463018	2.76501	2.68276
	14		1.47892	1.49086	1.55844	1.65348	1.44944	1.57409	1.43641	1.52849	1.02667	0.141942	2.95086	0.114869
	15			1.64936	1.70938	1.75178	1.48658	1.72505	1.73967	1.83146	1.73545	1.07885
	16				1.83443	1.88233	1.44822
	17					1.68709
8	1					1.24165	1.20471	1.96021	2.03435	2.30382	2.24984	2.35143	2.46504	2.7369					8																		8
	2				1.40336	1.3819	1.00182	0.296245	3.1311	2.93002	2.66021	2.73941	2.80349	2.96684	3.02891
	3			1.40141	1.45291	1.34764	0.974833	0.683217	0.487549	3.03587	2.83293	2.93921	2.96845	3.07865	3.10788	0.03156
	4		1.03951	1.38347	1.33501	1.29947	1.17454	0.934298	0.79433	0.441118	0.067051	0.0552519	0.0926155	0.103171	0.054966	0.0282799	3.12812
	5	2.357	2.82468	1.21085	1.20022	1.20961	1.23472	1.05436	1.0436	0.825778	0.423277	0.280845	0.252273	0.178136	0.112608	0.14432	0.13072	0.106675
	6	2.34853	2.5964	0.000273823	1.03	1.01458	1.25773	1.29036	1.29724	0.934477	0.624687	0.527119	0.511802	0.469841	0.441243	0.375785	0.315169	0.290336
	7	2.05545	2.36197	1.95526	0.626716	0.490653	0.0103228	1.91324	1.25365	0.924301	0.709078	0.6412	0.839734	0.954531	0.819592	0.589353	0.495572	0.461351
	8	1.62669	1.65136	1.41431	0.913244	0.721376	0.522364	1.23656	1.12495	0.895099	0.740387	0.854068	1.18019	1.2355	1.01051	0.757541	0.600406	0.520107
	9	1.06189	1.36924	1.5609	1.36111	1.60941	1.11821	1.1584	1.00728	0.779354	0.690346	0.964145	1.30107	1.40054	1.17133	0.806617	0.55081	0.395723
	10	1.09695	1.30794	1.45027	1.41483	1.45011	1.23447	1.15237	0.963535	0.67028	0.563388	0.800078	1.41691	1.68953	1.45942	0.933444	0.547938	0.177979
	11	1.17068	1.29346	1.4221	1.45682	1.35017	1.30644	1.21115	0.985716	0.655215	0.487464	0.440194	2.09766	2.12092	1.93122	1.47842	0.945822
	12	1.27784	1.33074	1.37621	1.4304	1.41633	1.35532	1.33563	1.04341	0.731053	0.434141	0.113686	2.81823	2.4641	2.35189	1.95772
	13	1.45815	1.36436	1.37281	1.39913	1.4616	1.40402	1.4952	1.3288	0.768057	0.442456	0.0918941	2.84937	2.76095
	14		1.53459	1.53962	1.6425	1.82223	1.82779	1.70723	1.59632	1.64261	0.847543	0.14873	2.85178	0.146956
	15			1.7824	1.9133	1.9949	2.05526	1.93288	1.8541	1.88788	1.81536	1.42942
	16				1.97029	1.92191	1.66294
	17					1.85501
9	1					1.18309	1.80137	2.0987	2.0759	2.17114	2.33516	2.43185	2.48831	2.65077					9																		9
	2				1.29006	1.40886	1.3193	2.50539	2.25344	2.48971	2.55335	2.74534	2.72589	2.92872	2.92901
	3			1.21306	1.56763	1.52485	1.18038	0.636786	2.83577	2.68635	2.79224	2.92717	2.92451	3.06209	3.02289	3.09107
	4		0.0683064	1.24344	1.41309	1.50943	1.58341	1.38651	0.903774	0.398851	0.0438873	0.0678697	0.113445	0.0833785	3.07967	3.02195	3.04172
	5	2.64022	2.98137	0.897332	1.22349	1.63745	1.82299	1.73639	1.38168	0.863233	0.403975	0.286201	0.227028	0.14839	0.0281355	0.0313428	0.0991409	0.132398
	6	2.46723	2.80849	0.0597007	0.80364	2.03953	2.28052	1.99198	1.37517	0.848214	0.564937	0.524619	0.527553	0.507937	0.392301	0.327117	0.292151	0.288673
	7	2.05558	2.46217	2.11646	2.4982	2.42947	2.45671	2.16129	1.34522	0.816792	0.620611	0.664376	0.952943	1.05096	0.832918	0.589052	0.489466	0.4626
	8	1.54428	1.98452	1.94047	2.38274	1.5183	1.02486	1.84432	1.10247	0.722941	0.693375	0.910507	1.28968	1.33089	1.05421	0.759408	0.601704	0.533083
	9	1.00822	1.27579	1.46963	1.71763	1.57293	1.19628	1.17722	0.913704	0.68558	0.716829	1.03264	1.42692	1.52294	1.26466	0.840818	0.599709	0.438609
	10	1.12279	1.36487	1.55924	1.63246	1.57583	1.32386	1.19385	0.946955	0.684506	0.622453	0.88482	1.51995	1.83205	1.59209	1.04139	0.669041	0.254651
	11	1.25257	1.42837	1.56127	1.49922	1.45685	1.4103	1.23436	1.01675	0.707596	0.547069	0.457663	1.90331	2.09201	1.9556	1.494	0.95884
	12	1.33508	1.3981	1.52127	1.58598	1.44982	1.47503	1.35578	1.104	0.811182	0.488789	0.0582811	2.6814	2.37123	2.33545	2.00896
	13	1.44355	1.47316	1.49971	1.60187	1.54486	1.46041	1.45439	1.27135	1.01636	0.506661	0.036467	2.6915	2.49253
	14		1.53589	1.54682	1.6583	1.72123	1.47487	1.72165	1.56802	1.68886	1.38231	0.314755	2.97037	0.266547
	15			1.60835	1.68251	1.65694	1.28044	1.7844	1.72825	1.83332	1.72887	1.17499
	16				1.79786	1.74039	1.28536
	17					1.71107
10	1					1.10737	2.35528	2.41801	2.11857	2.2335	2.17595	2.30951	2.44347	2.6928					10																		10
	2				1.1251	1.44657	0.403199	3.05627	2.58048	2.55058	2.5178	2.66514	2.80953	2.94394	2.95968
	3			1.2447	1.38228	1.34	0.7495	0.335771	0.119472	2.77551	2.74211	2.92648	2.95383	3.07185	3.04959	3.12414
	4		2.67876	1.15777	1.20543	1.33594	1.18173	0.952854	0.794677	0.48165	0.109246	0.132629	0.16069	0.0735052	3.11296	3.11729	3.07744
	5	2.49914	2.7458	0.628303	1.08228	1.14893	1.22853	1.27303	1.32407	0.907587	0.515099	0.365306	0.285979	0.184027	0.0692105	0.0637475	0.0703207	0.049618
	6	2.37788	2.62739	2.96754	0.422752	0.646402	0.363583	1.47849	1.31806	0.979557	0.702796	0.603474	0.577537	0.512959	0.38698	0.300906	0.249112	0.233331
	7	2.05245	2.3309	2.55188	0.204984	0.253493	0.35595	1.55969	1.2998	1.00376	0.751489	0.686989	0.855221	0.960932	0.782426	0.544762	0.447218	0.413735
	8	1.74825	2.10201	2.52406	0.230063	0.705881	0.694767	1.41077	1.16306	0.898804	0.774752	0.875298	1.19526	1.22558	0.987122	0.731869	0.591786	0.512939
	9	1.15093	1.42255	1.66705	1.91539	1.50833	1.22925	1.23816	1.03876	0.811828	0.726868	0.981116	1.37451	1.432	1.18692	0.804072	0.568034	0.40619
	10	1.20746	1.30309	1.57481	1.48287	1.49603	1.28878	1.20728	0.958447	0.690758	0.593885	0.871756	1.46868	1.73159	1.54058	0.883365	0.554716	0.247283
	11	1.34596	1.43176	1.53968	1.55116	1.46636	1.30404	1.21971	0.980174	0.690859	0.454139	0.326599	2.344	2.12957	1.9349	1.42691	0.728496
	12	1.38882	1.40085	1.50964	1.56024	1.42187	1.32771	1.28559	1.04285	0.763855	0.327307	3.07904	2.6077	2.45463	2.29125	1.96751
	13	1.46193	1.45075	1.48342	1.64741	1.63173	1.46237	1.35994	1.14573	0.893597	0.35953	3.04704	2.6656	2.61601
	14		1.55742	1.60341	1.77419	1.85107	1.7859	1.61278	1.34821	1.7113	1.65147	0.0353324	2.83939	2.79472
	15			1.70668	1.81147	1.95376	1.70343	1.75884	1.69643	1.89233	1.95031	1.64194
	16				1.85052	1.85308	1.45879
	17					1.73309
