# Supplementary material for: Stationary Atrial Fibrillation Properties in the Goat Do Not Entail Stable or Recurrent Conduction Patterns
Source: Front Physiol. 2018 Jul 27;9:947. doi: 10.3389/fphys.2018.00947 (PMC6072874; doi:10.3389/fphys.2018.00947)
Supplement: Supplementary file 1 [file Data_Sheet_1.ZIP › Goat_12_Property maps.xlsx]

## Sheet: AFCL
AFCL
Signals of insufficient quality were excluded from the property maps. Signals could be rejected based on noise low amplitude, large artefact or ventricluar farfields that could not be substracted.
		1	2	3	4	5	6	7	8	9	10	11	12	13	14	15	16	17
1	1					0.105871	0.108758	0.107796	0.107796	0.105871	0.105871	0.102984	0.101059	0.102021					1																		1
	2				0.106833	0.105871	0.105871	0.107796	0.104909	0.103946	0.103946	0.104909	0.102021	0.100096	0.101059
0.00342004	3			0.103946	0.105871	0.105871	0.105871	0.106833	0.102021	0.100096	0.100096	0.101059	0.101059	0.0991338	0.101059	0.0981713
	4		0.105871	0.103946	0.103946	0.102984	0.106833	0.106352	0.100096	0.100096	0.100096	0.101059	0.100096	0.0981713	0.0991338	0.0981713	0.099615
	5	0.107796	0.104909	0.102021	0.104909	0.102984	0.102984	0.101059	0.101059	0.101059	0.102984	0.102021	0.0981713	0.0991338	0.0981713	0.0981713	0.0991338	0.0981713
	6	0.106833	0.102021	0.102021	0.101059	0.101059	0.0991338	0.0991338	0.0991338	0.102021	0.102984	0.0991338	0.0981713	0.100096	0.0991338	0.0981713	0.100096	0.0981713
	7	0.103946	0.101059	0.100096	0.0991338	0.100096	0.0991338	0.0981713	0.100096	0.102021	0.102021	0.0981713	0.101059	0.100096	0.100096	0.0981713	0.0981713	0.0981713
	8	0.103946	0.101059	0.100096	0.100096	0.0991338	0.0981713	0.0972089	0.0991338	0.102984	0.101059	0.101059	0.102984	0.100096	0.101059	0.0981713	0.102984	0.0972089
	9	0.101059	0.100096	0.100096	0.0991338	0.0991338	0.0972089	0.0972089	0.0991338	0.10154	0.104909	0.102984	0.102021	0.102021	0.0991338	0.0981713	0.0962464	0.0962464
	10	0.10154	0.100096	0.100096	0.0981713	0.0991338	0.0991338	0.0991338	0.0962464	0.100096	0.102502	0.102984	0.100096	0.0991338	0.0962464	0.0972089	0.0972089	0.0972089
	11	0.104909	0.102984	0.100096	0.0991338	0.100096	0.0991338	0.100096	0.0972089	0.0981713	0.100096	0.0991338	0.0991338	0.0981713	0.0981713	0.0972089	0.0981713	0.0972089
	12	0.103946	0.103946	0.101059	0.0981713	0.0991338	0.0991338	0.0991338	0.0981713	0.0962464	0.0991338	0.0972089	0.0962464	0.0952839	0.0943215	0.0962464	0.0991338	0.0981713
	13	0.103946	0.102984	0.102021	0.0981713	0.0981713	0.0981713	0.0981713	0.0962464	0.0952839	0.0952839	0.0952839	0.0962464	0.0943215	0.0952839	0.0991338	0.0991338	0.0986526
	14		0.104909	0.103946	0.100096	0.0991338	0.0991338	0.0981713	0.0962464	0.0943215	0.0962464	0.0952839	0.0962464	0.0972089	0.0962464	0.100096	0.101059
	15			0.106833	0.100096	0.0991338	0.0991338	0.0962464	0.0943215	0.093359	0.0904716	0.0952839	0.0991338	0.0972089	0.100096	0.100096
	16				0.101059	0.0981713	0.0972089	0.0952839	0.0952839	0.0923965	0.0923965	0.0914341	0.0943215	0.0991338	0.100577
	17					0.0962464	0.0952839	0.0943215	0.093359	0.0914341	0.0923965	0.0943215	0.0943215	0.0952839
2	1					0.106833	0.107796	0.108758	0.107796	0.107796	0.107796	0.104909	0.102021	0.102502					2																		2
	2				0.106833	0.106833	0.108758	0.106833	0.104427	0.102984	0.104909	0.104909	0.101059	0.100096	0.101059
0.00356232	3			0.103946	0.105871	0.107796	0.106833	0.106833	0.102021	0.101059	0.100096	0.102502	0.101059	0.100096	0.100096	0.0991338
	4		0.105871	0.102984	0.104909	0.104909	0.106833	0.104909	0.101059	0.100096	0.100096	0.102021	0.100096	0.0991338	0.0991338	0.0981713	0.100096
	5	0.107796	0.104909	0.102021	0.104909	0.103946	0.103946	0.102021	0.101059	0.101059	0.102021	0.102021	0.0981713	0.0991338	0.0991338	0.0991338	0.100096	0.0972089
	6	0.105871	0.102021	0.101059	0.102502	0.102021	0.100096	0.0991338	0.100096	0.102984	0.103946	0.100096	0.0991338	0.100096	0.0991338	0.0981713	0.0991338	0.0962464
	7	0.102984	0.101059	0.100096	0.100096	0.101059	0.0991338	0.0972089	0.102021	0.102984	0.102021	0.0991338	0.101059	0.0991338	0.0991338	0.0972089	0.0972089	0.0962464
	8	0.102984	0.100096	0.0991338	0.100096	0.0991338	0.0991338	0.0972089	0.0991338	0.10154	0.101059	0.101059	0.102021	0.0991338	0.101059	0.0991338	0.100096	0.0962464
	9	0.102021	0.101059	0.100096	0.100096	0.0991338	0.0981713	0.0972089	0.0981713	0.101059	0.103946	0.101059	0.101059	0.102021	0.0991338	0.0981713	0.0962464	0.0962464
	10	0.101059	0.101059	0.100096	0.100096	0.0991338	0.0991338	0.0981713	0.0972089	0.0991338	0.102021	0.102021	0.0991338	0.0981713	0.0962464	0.0962464	0.0962464	0.0962464
	11	0.103946	0.103465	0.101059	0.0991338	0.100096	0.0991338	0.100096	0.0972089	0.0972089	0.0991338	0.0991338	0.0981713	0.0962464	0.0972089	0.0962464	0.0962464	0.0962464
	12	0.103946	0.102984	0.101059	0.0991338	0.0991338	0.0981713	0.0991338	0.0962464	0.0972089	0.0991338	0.0962464	0.0952839	0.0943215	0.0952839	0.0962464	0.0972089	0.0962464
	13	0.102984	0.103946	0.102984	0.0991338	0.0981713	0.0981713	0.0981713	0.0972089	0.0952839	0.0962464	0.0952839	0.0962464	0.0952839	0.0962464	0.0972089	0.0981713	0.0962464
	14		0.104909	0.103946	0.101059	0.099615	0.0991338	0.0981713	0.0962464	0.0943215	0.0952839	0.0972089	0.0952839	0.0972089	0.0972089	0.0991338	0.0981713
	15			0.107796	0.101059	0.100096	0.0972089	0.0962464	0.093359	0.093359	0.0914341	0.0952839	0.0972089	0.0962464	0.0981713	0.101059
	16				0.102021	0.0981713	0.0972089	0.0962464	0.0952839	0.093359	0.0923965	0.0914341	0.093359	0.0962464	0.101059
	17					0.0972089	0.0972089	0.0952839	0.093359	0.0923965	0.0923965	0.0943215	0.0928778	0.0952839
3	1					0.104909	0.107796	0.107796	0.109721	0.107796	0.106833	0.102984	0.101059	0.101059					3																		3
	2				0.106833	0.105871	0.106833	0.108758	0.106833	0.104427	0.104909	0.102984	0.100096	0.0991338	0.0991338
0.00373946	3			0.103946	0.106352	0.106833	0.105871	0.107796	0.102021	0.101059	0.100096	0.102021	0.100096	0.0991338	0.0991338	0.0972089
	4		0.104909	0.102984	0.104909	0.104909	0.105871	0.105871	0.100096	0.0991338	0.100096	0.101059	0.0991338	0.0981713	0.0991338	0.0981713	0.0991338
	5	0.106833	0.103946	0.102021	0.104909	0.102984	0.102021	0.100096	0.101059	0.102021	0.102984	0.102021	0.0981713	0.0991338	0.0981713	0.0972089	0.0981713	0.0962464
	6	0.104909	0.102021	0.101059	0.102021	0.101059	0.0981713	0.0981713	0.0991338	0.102021	0.102984	0.0991338	0.0972089	0.101059	0.0972089	0.0981713	0.0981713	0.0962464
	7	0.103465	0.101059	0.100096	0.100096	0.0991338	0.0972089	0.0972089	0.101059	0.102021	0.102021	0.0981713	0.100096	0.0991338	0.0981713	0.0981713	0.0981713	0.0952839
	8	0.102984	0.101059	0.0991338	0.0991338	0.0972089	0.0972089	0.0962464	0.0981713	0.102021	0.100096	0.0991338	0.100096	0.0991338	0.099615	0.0972089	0.102021	0.0943215
	9	0.101059	0.100096	0.0991338	0.0991338	0.0991338	0.0972089	0.0962464	0.0972089	0.0991338	0.103946	0.101059	0.101059	0.101059	0.0981713	0.0972089	0.0962464	0.0952839
	10	0.100096	0.0991338	0.0981713	0.0981713	0.0981713	0.0962464	0.0962464	0.0972089	0.0981713	0.101059	0.102021	0.0981713	0.0972089	0.0952839	0.0952839	0.0962464	0.0952839
	11	0.104909	0.102984	0.0991338	0.0991338	0.0991338	0.0981713	0.0967276	0.0952839	0.0972089	0.100096	0.0981713	0.0972089	0.0948027	0.0972089	0.0952839	0.0962464	0.0952839
	12	0.104909	0.103946	0.100096	0.0981713	0.0991338	0.0981713	0.0972089	0.0952839	0.0962464	0.0972089	0.0962464	0.0952839	0.0943215	0.0943215	0.0952839	0.0972089	0.0952839
	13	0.103946	0.103946	0.102021	0.0991338	0.0972089	0.0981713	0.0972089	0.0952839	0.0943215	0.0952839	0.0962464	0.0952839	0.0943215	0.0943215	0.0972089	0.0972089	0.0962464
	14		0.104909	0.103946	0.100096	0.0991338	0.0991338	0.0962464	0.0952839	0.093359	0.0952839	0.0952839	0.0943215	0.0952839	0.0962464	0.0981713	0.0981713
	15			0.105871	0.0991338	0.0981713	0.0981713	0.0952839	0.093359	0.093359	0.0914341	0.0943215	0.0962464	0.0962464	0.0981713	0.0991338
	16				0.100096	0.0972089	0.0972089	0.0957652	0.093359	0.0914341	0.0914341	0.0923965	0.0943215	0.0972089	0.100096
	17					0.0972089	0.0962464	0.093359	0.093359	0.0914341	0.0914341	0.093359	0.0923965	0.0943215
4	1					0.106833	0.109721	0.109721	0.109721	0.106833	0.107796	0.104909	0.102984	0.102984					4																		4
	2				0.106833	0.106833	0.107796	0.109721	0.105871	0.103946	0.103946	0.104909	0.102984	0.101059	0.102021
0.00333065	3			0.104909	0.108758	0.106833	0.106833	0.107796	0.102021	0.102021	0.100096	0.102984	0.102021	0.100096	0.101059	0.0991338
	4		0.105871	0.104909	0.107796	0.105871	0.105871	0.104909	0.101059	0.100096	0.101059	0.102984	0.101059	0.100096	0.100096	0.0991338	0.102021
	5	0.106833	0.103946	0.102021	0.106833	0.103946	0.102984	0.101059	0.102021	0.102021	0.104427	0.103946	0.0991338	0.101059	0.100096	0.0991338	0.101059	0.0991338
	6	0.106352	0.101059	0.100577	0.102021	0.102021	0.100096	0.0991338	0.100096	0.104909	0.103946	0.100096	0.0991338	0.101059	0.0991338	0.0991338	0.100096	0.0981713
	7	0.102984	0.101059	0.100096	0.0991338	0.100577	0.0991338	0.0972089	0.101059	0.103946	0.103946	0.0991338	0.102021	0.100096	0.101059	0.0991338	0.100096	0.0981713
	8	0.102984	0.100096	0.099615	0.100096	0.0991338	0.0991338	0.0962464	0.0981713	0.102984	0.101059	0.101059	0.102021	0.100096	0.101059	0.0991338	0.101059	0.0972089
	9	0.102021	0.102021	0.0991338	0.0991338	0.0991338	0.0972089	0.0976901	0.0981713	0.100096	0.105871	0.101059	0.102021	0.102021	0.100096	0.0991338	0.0981713	0.0962464
	10	0.101059	0.101059	0.0991338	0.0991338	0.0991338	0.0981713	0.0981713	0.0981713	0.101059	0.102984	0.102984	0.100096	0.100096	0.100096	0.0991338	0.0991338	0.0962464
	11	0.104909	0.104909	0.101059	0.100096	0.100096	0.0981713	0.0991338	0.0981713	0.0991338	0.101059	0.0991338	0.100096	0.0991338	0.0972089	0.0972089	0.0991338	0.0972089
	12	0.105871	0.104909	0.101059	0.100096	0.100096	0.0991338	0.0991338	0.0981713	0.0991338	0.0991338	0.0981713	0.0972089	0.0962464	0.0952839	0.0972089	0.0991338	0.0972089
	13	0.105871	0.105871	0.104909	0.100096	0.0981713	0.0981713	0.0981713	0.0972089	0.0981713	0.0981713	0.0972089	0.0972089	0.0943215	0.0962464	0.0991338	0.100096	0.0972089
	14		0.106833	0.107796	0.101059	0.100096	0.0991338	0.0981713	0.0972089	0.0952839	0.0972089	0.0972089	0.0962464	0.0962464	0.0972089	0.101059	0.100096
	15			0.107796	0.101059	0.099615	0.0991338	0.0981713	0.0952839	0.0952839	0.0943215	0.0972089	0.0991338	0.0981713	0.101059	0.100096
	16				0.102021	0.0991338	0.0981713	0.0972089	0.0962464	0.0952839	0.0943215	0.0952839	0.0962464	0.101059	0.102021
	17					0.0991338	0.0991338	0.0972089	0.0952839	0.0952839	0.0952839	0.0972089	0.0962464	0.0981713
5	1					0.104909	0.108758	0.108758	0.108758	0.106833	0.105871	0.102984	0.102021	0.102021					5																		5
	2				0.105871	0.104909	0.106833	0.108758	0.106833	0.103946	0.103946	0.103946	0.101059	0.0991338	0.0991338
	3			0.104909	0.106833	0.105871	0.104909	0.106833	0.102021	0.101059	0.0991338	0.102021	0.101059	0.0986526	0.0991338	0.0991338
	4		0.104909	0.104909	0.105871	0.103946	0.105871	0.103946	0.100096	0.0991338	0.0991338	0.101059	0.100096	0.0991338	0.0991338	0.0981713	0.101059
	5	0.107796	0.103946	0.102984	0.105871	0.102984	0.102984	0.101059	0.100096	0.101059	0.102984	0.102021	0.0991338	0.100096	0.0981713	0.0991338	0.101059	0.0972089
	6	0.105871	0.102021	0.102021	0.102021	0.102021	0.100096	0.0981713	0.0991338	0.102984	0.103946	0.100096	0.0981713	0.10154	0.0981713	0.0991338	0.0991338	0.0972089
	7	0.103946	0.101059	0.100096	0.100096	0.101059	0.0981713	0.0991338	0.101059	0.102984	0.102021	0.0991338	0.102021	0.100577	0.0991338	0.0981713	0.0981713	0.0972089
	8	0.103946	0.100096	0.100096	0.100096	0.0981713	0.0991338	0.0976901	0.0991338	0.102021	0.100096	0.101059	0.102021	0.100096	0.101059	0.0991338	0.101059	0.0972089
	9	0.102021	0.101059	0.100096	0.099615	0.100096	0.0981713	0.0981713	0.0981713	0.101059	0.104909	0.102021	0.102021	0.102021	0.0991338	0.0991338	0.0972089	0.0972089
	10	0.102021	0.101059	0.101059	0.0991338	0.0991338	0.0981713	0.0981713	0.0972089	0.0981713	0.102021	0.102984	0.0991338	0.0981713	0.0981713	0.0962464	0.0981713	0.0972089
	11	0.105871	0.103946	0.101059	0.0991338	0.0991338	0.0991338	0.0991338	0.0972089	0.0972089	0.0991338	0.0981713	0.0981713	0.0972089	0.0972089	0.0972089	0.0981713	0.0962464
	12	0.103946	0.103946	0.101059	0.0991338	0.0981713	0.0981713	0.0991338	0.0972089	0.0967276	0.0981713	0.0962464	0.0972089	0.0962464	0.0943215	0.0952839	0.0981713	0.0972089
	13	0.103946	0.103946	0.101059	0.0991338	0.0972089	0.0981713	0.0981713	0.0972089	0.0952839	0.0962464	0.0962464	0.0962464	0.0943215	0.0943215	0.0972089	0.0981713	0.0981713
	14		0.104909	0.105871	0.101059	0.0991338	0.0991338	0.0972089	0.0952839	0.0943215	0.0962464	0.0972089	0.0952839	0.0952839	0.0972089	0.0981713	0.100096
	15			0.108758	0.100096	0.0991338	0.0972089	0.0962464	0.093359	0.093359	0.0923965	0.0952839	0.0981713	0.0972089	0.0972089	0.101059
	16				0.101059	0.0981713	0.0972089	0.0943215	0.093359	0.0923965	0.0923965	0.0923965	0.0952839	0.0991338	0.100096
	17					0.0981713	0.0972089	0.0943215	0.0923965	0.0923965	0.093359	0.0943215	0.0923965	0.0952839
6	1					0.106833	0.108758	0.108758	0.109721	0.106833	0.106833	0.102021	0.102021	0.102984					6																		6
	2				0.107796	0.106833	0.108758	0.107796	0.105871	0.103946	0.104909	0.103946	0.101059	0.0991338	0.100096
0.00328783	3			0.103946	0.105871	0.105871	0.105871	0.105871	0.102984	0.102021	0.101059	0.102021	0.101059	0.0981713	0.100096	0.0991338
	4		0.104909	0.102984	0.103946	0.102984	0.104909	0.104909	0.102021	0.100096	0.101059	0.102021	0.0991338	0.0991338	0.0991338	0.0986526	0.100096
	5	0.107796	0.103946	0.102021	0.104909	0.102984	0.102984	0.102021	0.102021	0.102021	0.102984	0.102984	0.0991338	0.0991338	0.0981713	0.0991338	0.100577	0.0972089
	6	0.106833	0.101059	0.101059	0.102021	0.100096	0.0981713	0.0991338	0.101059	0.103946	0.104909	0.100096	0.0981713	0.100096	0.0981713	0.0981713	0.101059	0.0972089
	7	0.103946	0.101059	0.100096	0.0991338	0.101059	0.0981713	0.0972089	0.10154	0.102021	0.102984	0.0981713	0.100096	0.0991338	0.100096	0.0972089	0.0991338	0.0981713
	8	0.102984	0.100096	0.100096	0.100096	0.0991338	0.0981713	0.0962464	0.0991338	0.102021	0.100096	0.100096	0.101059	0.0991338	0.100096	0.0991338	0.102984	0.0972089
	9	0.101059	0.101059	0.0991338	0.100096	0.0991338	0.0981713	0.0972089	0.0972089	0.100096	0.103946	0.102021	0.101059	0.101059	0.0991338	0.0981713	0.0991338	0.0972089
	10	0.101059	0.101059	0.100096	0.100096	0.0991338	0.0981713	0.0981713	0.0972089	0.100096	0.100577	0.102021	0.0991338	0.0981713	0.0981713	0.0972089	0.0991338	0.0972089
	11	0.105871	0.103946	0.102021	0.0991338	0.100096	0.0991338	0.0991338	0.0981713	0.0972089	0.100096	0.0991338	0.0991338	0.0981713	0.0972089	0.0962464	0.0981713	0.0972089
	12	0.105871	0.104909	0.101059	0.0981713	0.0981713	0.0981713	0.0981713	0.0972089	0.0981713	0.0991338	0.0972089	0.0972089	0.0952839	0.0952839	0.0981713	0.0981713	0.0972089
	13	0.103946	0.104909	0.102021	0.0991338	0.0962464	0.0972089	0.0981713	0.0972089	0.0972089	0.0962464	0.0972089	0.0962464	0.0952839	0.0952839	0.0981713	0.0991338	0.0981713
	14		0.105871	0.105871	0.0986526	0.0981713	0.0981713	0.0972089	0.0962464	0.0943215	0.0972089	0.0972089	0.0952839	0.0972089	0.0981713	0.0991338	0.101059
	15			0.107796	0.0991338	0.0981713	0.0991338	0.0972089	0.0943215	0.0943215	0.0943215	0.0962464	0.0972089	0.0981713	0.100096	0.101059
	16				0.101059	0.0981713	0.0972089	0.0962464	0.0952839	0.0943215	0.0943215	0.0943215	0.0962464	0.0981713	0.100577
	17					0.0981713	0.0981713	0.0962464	0.0943215	0.0943215	0.0943215	0.0957652	0.0952839	0.0972089
7	1					0.107796	0.10924	0.108758	0.108758	0.107796	0.106833	0.103946	0.102984	0.102021					7																		7
	2				0.107796	0.106833	0.107796	0.108758	0.106833	0.104909	0.105871	0.104909	0.102021	0.100096	0.0991338
	3			0.105871	0.106833	0.106833	0.107796	0.106833	0.102984	0.102021	0.0991338	0.100096	0.101059	0.0991338	0.100096	0.0991338
	4		0.106833	0.104909	0.106833	0.103946	0.105871	0.105871	0.102021	0.100096	0.100096	0.100096	0.100096	0.100096	0.0991338	0.0981713	0.101059
	5	0.107796	0.105871	0.102984	0.107796	0.103946	0.102984	0.100096	0.100096	0.101059	0.102021	0.102021	0.0981713	0.0991338	0.0981713	0.0991338	0.101059	0.0972089
	6	0.104909	0.102984	0.102984	0.102984	0.102984	0.100096	0.099615	0.101059	0.103946	0.103946	0.100577	0.0981713	0.101059	0.0991338	0.0991338	0.0991338	0.0962464
	7	0.104909	0.102984	0.102021	0.102021	0.101059	0.0991338	0.0991338	0.101059	0.102984	0.102021	0.0991338	0.102021	0.0991338	0.0991338	0.0991338	0.0981713	0.0962464
	8	0.103946	0.102984	0.101059	0.101059	0.0991338	0.0986526	0.0981713	0.0991338	0.101059	0.101059	0.102021	0.102984	0.100096	0.101059	0.0991338	0.10154	0.0962464
	9	0.102021	0.102021	0.100096	0.100096	0.0991338	0.0981713	0.0981713	0.0981713	0.0991338	0.106833	0.102984	0.102021	0.102021	0.100096	0.0991338	0.0972089	0.0952839
	10	0.102021	0.101059	0.0991338	0.0991338	0.0991338	0.0991338	0.100096	0.0962464	0.100096	0.102021	0.102984	0.100096	0.100096	0.0981713	0.0972089	0.0967276	0.0952839
	11	0.105871	0.103946	0.100096	0.101059	0.100096	0.100096	0.0991338	0.0981713	0.0981713	0.100577	0.0991338	0.0991338	0.0981713	0.0981713	0.0972089	0.0972089	0.0962464
	12	0.104909	0.103946	0.101059	0.0991338	0.100096	0.0981713	0.0991338	0.0972089	0.0972089	0.100096	0.0962464	0.0962464	0.0962464	0.0943215	0.0981713	0.0981713	0.0962464
	13	0.103946	0.103946	0.102021	0.0991338	0.0976901	0.0981713	0.0981713	0.0972089	0.0962464	0.0972089	0.0952839	0.0972089	0.0943215	0.0943215	0.0981713	0.0972089	0.0972089
	14		0.104909	0.105871	0.100096	0.0991338	0.0991338	0.0981713	0.0962464	0.0943215	0.0972089	0.0962464	0.0962464	0.0972089	0.0972089	0.0991338	0.0991338
	15			0.109721	0.102021	0.0991338	0.0991338	0.0962464	0.0943215	0.0952839	0.093359	0.0962464	0.0981713	0.0981713	0.0991338	0.0991338
	16				0.101059	0.0981713	0.0981713	0.0962464	0.0952839	0.0923965	0.093359	0.093359	0.0952839	0.0991338	0.102021
	17					0.0972089	0.0962464	0.0952839	0.0943215	0.0923965	0.093359	0.0952839	0.0943215	0.0962464
8	1					0.105871	0.107315	0.108758	0.108758	0.105871	0.105871	0.102021	0.102021	0.102021					8																		8
	2				0.106833	0.104909	0.106833	0.107796	0.105871	0.104909	0.103946	0.103946	0.101059	0.100096	0.100096
0.00339067	3			0.104909	0.106833	0.105871	0.10539	0.107796	0.102984	0.101059	0.101059	0.101059	0.102021	0.0991338	0.0991338	0.0991338
	4		0.10539	0.103946	0.104909	0.103946	0.104909	0.105871	0.101059	0.100096	0.101059	0.100096	0.100096	0.0991338	0.0991338	0.0991338	0.101059
	5	0.108758	0.104909	0.102984	0.104909	0.102984	0.102021	0.100096	0.101059	0.102021	0.102984	0.102021	0.0991338	0.100096	0.0981713	0.0991338	0.100096	0.0972089
	6	0.104909	0.102021	0.102021	0.102021	0.101059	0.0981713	0.0981713	0.100096	0.102984	0.103465	0.100096	0.0991338	0.100096	0.0981713	0.0991338	0.100096	0.0952839
	7	0.103465	0.100577	0.100096	0.0991338	0.100096	0.0972089	0.0972089	0.101059	0.102021	0.102021	0.0991338	0.101059	0.0991338	0.100096	0.0991338	0.0986526	0.0962464
	8	0.102984	0.100096	0.100096	0.0991338	0.0972089	0.0981713	0.0962464	0.0991338	0.101059	0.101059	0.101059	0.102021	0.0991338	0.102021	0.0981713	0.102021	0.0972089
	9	0.101059	0.101059	0.0981713	0.0981713	0.0981713	0.0962464	0.0972089	0.0972089	0.0991338	0.103946	0.103946	0.102021	0.102984	0.101059	0.100096	0.0972089	0.0962464
	10	0.101059	0.100096	0.0991338	0.0981713	0.0991338	0.0972089	0.0972089	0.0962464	0.0991338	0.102021	0.102984	0.101059	0.100096	0.0991338	0.0972089	0.0972089	0.0962464
	11	0.103946	0.102984	0.100096	0.0986526	0.0991338	0.0972089	0.0972089	0.0967276	0.0972089	0.100096	0.0991338	0.0991338	0.0981713	0.0972089	0.0962464	0.0981713	0.0972089
	12	0.103946	0.102984	0.101059	0.0981713	0.0991338	0.0981713	0.0972089	0.0962464	0.0972089	0.0981713	0.0972089	0.0962464	0.0952839	0.0943215	0.0972089	0.0991338	0.0972089
	13	0.102984	0.102984	0.101059	0.0991338	0.0972089	0.0981713	0.0972089	0.0952839	0.0962464	0.0972089	0.0972089	0.0962464	0.0943215	0.0952839	0.0972089	0.0991338	0.0972089
	14		0.103946	0.103946	0.101059	0.100096	0.0991338	0.0972089	0.0952839	0.0943215	0.0962464	0.0972089	0.0952839	0.0962464	0.0962464	0.0981713	0.0991338
	15			0.106833	0.101059	0.0991338	0.0981713	0.0962464	0.0952839	0.0943215	0.0923965	0.0962464	0.0972089	0.0972089	0.0981713	0.0991338
	16				0.101059	0.0972089	0.0972089	0.0952839	0.0943215	0.093359	0.093359	0.0923965	0.0943215	0.100096	0.100096
	17					0.0972089	0.0962464	0.0943215	0.093359	0.093359	0.093359	0.0952839	0.093359	0.0962464
9	1					0.107796	0.110683	0.110683	0.109721	0.108758	0.106833	0.102021	0.101059	0.101059					9																		9
	2				0.107796	0.108758	0.109721	0.111646	0.106833	0.104909	0.104909	0.102984	0.100096	0.0991338	0.0991338
0.00404611	3			0.103946	0.106833	0.107796	0.108758	0.108758	0.102021	0.10154	0.100096	0.102021	0.101059	0.0981713	0.0991338	0.0972089
	4		0.103946	0.103465	0.104909	0.104909	0.107796	0.105871	0.100096	0.100096	0.100096	0.100577	0.0991338	0.0981713	0.0981713	0.0981713	0.100096
	5	0.107315	0.103946	0.102021	0.104909	0.102984	0.103946	0.100096	0.100096	0.101059	0.101059	0.101059	0.099615	0.0991338	0.0972089	0.0972089	0.0991338	0.0972089
	6	0.105871	0.101059	0.101059	0.101059	0.101059	0.0981713	0.0981713	0.100096	0.101059	0.102021	0.101059	0.0981713	0.100096	0.0972089	0.0972089	0.0981713	0.0972089
	7	0.103946	0.100096	0.100096	0.0991338	0.101059	0.0981713	0.0972089	0.100096	0.101059	0.101059	0.0991338	0.101059	0.0991338	0.0981713	0.0972089	0.0981713	0.0962464
	8	0.102984	0.101059	0.100096	0.100096	0.0981713	0.0972089	0.0972089	0.0972089	0.102021	0.100096	0.101059	0.102021	0.0991338	0.101059	0.0986526	0.101059	0.0952839
	9	0.102021	0.100096	0.0991338	0.0991338	0.0981713	0.0972089	0.0962464	0.0962464	0.0991338	0.103946	0.100577	0.102021	0.101059	0.0991338	0.0986526	0.0962464	0.0952839
	10	0.102021	0.101059	0.0991338	0.0991338	0.0991338	0.0981713	0.0972089	0.0962464	0.0972089	0.101059	0.101059	0.0981713	0.0991338	0.0972089	0.0952839	0.0972089	0.0952839
	11	0.105871	0.104909	0.100096	0.0991338	0.100096	0.0991338	0.0981713	0.0962464	0.0952839	0.0986526	0.0981713	0.0972089	0.0972089	0.0962464	0.0952839	0.0972089	0.0962464
	12	0.103946	0.102021	0.100096	0.0981713	0.100096	0.0991338	0.0991338	0.0962464	0.0952839	0.0972089	0.0952839	0.0962464	0.0943215	0.0923965	0.0962464	0.0972089	0.0972089
	13	0.102021	0.102021	0.101059	0.0981713	0.0981713	0.0981713	0.0972089	0.0952839	0.0952839	0.0948027	0.0952839	0.0943215	0.0923965	0.093359	0.0962464	0.0972089	0.0972089
	14		0.102984	0.103946	0.0981713	0.100096	0.0981713	0.0972089	0.0943215	0.093359	0.0952839	0.0943215	0.093359	0.0943215	0.0952839	0.0991338	0.0991338
	15			0.108758	0.0991338	0.0981713	0.0972089	0.0962464	0.0923965	0.0923965	0.0904716	0.0943215	0.0962464	0.0972089	0.0991338	0.100096
	16				0.101059	0.0972089	0.0972089	0.0952839	0.0923965	0.0914341	0.0914341	0.0914341	0.0943215	0.0981713	0.101059
	17					0.0952839	0.0962464	0.093359	0.0914341	0.0914341	0.0914341	0.093359	0.0914341	0.0943215
10	1					0.107796	0.109721	0.109721	0.108758	0.107796	0.108758	0.102984	0.100096	0.102021					10																		10
	2				0.107796	0.106833	0.108758	0.109721	0.105871	0.104909	0.104909	0.103946	0.101059	0.100096	0.100096
0.00358178	3			0.104909	0.107796	0.106833	0.107796	0.107796	0.101059	0.101059	0.100096	0.101059	0.100096	0.0991338	0.099615	0.0972089
	4		0.105871	0.104909	0.105871	0.104909	0.106833	0.104909	0.100096	0.100096	0.100096	0.100096	0.100096	0.0981713	0.0981713	0.0972089	0.100096
	5	0.107796	0.104427	0.101059	0.105871	0.102984	0.102984	0.100096	0.100096	0.101059	0.102021	0.101059	0.0981713	0.0991338	0.0981713	0.0981713	0.0991338	0.0981713
	6	0.104909	0.101059	0.100096	0.102021	0.102021	0.0991338	0.0981713	0.100096	0.102021	0.102984	0.100096	0.0972089	0.101059	0.0981713	0.0981713	0.100096	0.0962464
	7	0.103946	0.102021	0.101059	0.0991338	0.101059	0.0991338	0.0972089	0.101059	0.102984	0.102984	0.0991338	0.100096	0.0991338	0.100096	0.0981713	0.0981713	0.0972089
	8	0.103946	0.101059	0.100096	0.100096	0.0991338	0.0981713	0.0962464	0.0972089	0.102021	0.0991338	0.100096	0.101059	0.0991338	0.100096	0.100096	0.102021	0.0962464
	9	0.100096	0.100096	0.0991338	0.0981713	0.0991338	0.0981713	0.0962464	0.0967276	0.100096	0.105871	0.102021	0.101059	0.100096	0.100096	0.0991338	0.0972089	0.0972089
	10	0.101059	0.100096	0.0972089	0.0981713	0.0981713	0.0981713	0.0981713	0.0962464	0.100096	0.102021	0.101059	0.0991338	0.0981713	0.0972089	0.0972089	0.0972089	0.0972089
	11	0.104909	0.102984	0.100096	0.100096	0.0991338	0.0981713	0.0991338	0.0981713	0.0962464	0.0981713	0.0972089	0.0981713	0.0972089	0.0981713	0.0962464	0.0972089	0.0972089
	12	0.103946	0.102984	0.101059	0.0991338	0.0991338	0.0991338	0.0991338	0.0962464	0.0962464	0.0981713	0.0972089	0.0962464	0.0952839	0.0952839	0.0962464	0.0972089	0.0972089
	13	0.102021	0.102984	0.102021	0.100096	0.0981713	0.0981713	0.0981713	0.0962464	0.0962464	0.0972089	0.0952839	0.0962464	0.0952839	0.0962464	0.0981713	0.0981713	0.0981713
	14		0.104909	0.104909	0.101059	0.101059	0.0991338	0.0981713	0.0952839	0.0943215	0.0972089	0.0962464	0.0962464	0.0972089	0.0962464	0.0981713	0.0991338
	15			0.108758	0.101059	0.101059	0.0981713	0.0981713	0.0952839	0.093359	0.0923965	0.0962464	0.0981713	0.0962464	0.0991338	0.100096
	16				0.102021	0.0991338	0.0972089	0.0962464	0.0943215	0.0923965	0.093359	0.093359	0.0943215	0.0991338	0.101059
	17					0.0981713	0.0962464	0.0952839	0.093359	0.0923965	0.0923965	0.0952839	0.0943215	0.0962464

## Sheet: DISS
MaxDissociation
Signals of insufficient quality were excluded from the property maps. Signals could be rejected based on noise low amplitude, large artefact or ventricluar farfields that could not be substracted.
		1	2	3	4	5	6	7	8	9	10	11	12	13	14	15	16	17
1	1					15.8144	18.2082	20.0911	19.894	19.3654	20.6898	20.2838	18.7694	19.4394					1																		1
	2				19.6949	20.4921	23.1142	25.188	25.2456	25.1931	26.2718	26.3814	23.0236	21.2724	21.1567
0.00342004	3			19.9273	22.6436	23.5997	25.5009	27.6296	24.6959	21.36	24.1694	25.1258	21.0483	20.9031	21.9107	20.141
	4		16.7671	19.9809	22.7466	23.9708	26.554	27.715	25.3904	22.457	22.8381	23.3671	19.7409	19.6989	22.4079	22.1021	20.4777
	5	16.8464	19.049	21.3148	24.1521	25.3973	26.3492	26.5452	26.9123	23.7604	24.7164	23.6506	20.6596	21.0931	23.7227	24.8042	22.8639	17.5074
	6	20.9205	22.0153	21.3507	23.6789	25.0883	23.5714	23.5539	26.2841	26.0067	25.5789	23.6573	22.1303	22.742	24.3709	24.7215	23.7326	18.4108
	7	19.8066	23.1933	22.1898	23.341	23.1738	21.2954	21.329	25.4533	27.025	25.5133	24.8473	24.0486	24.565	24.9341	32.4344	31.257	26.8513
	8	18.3759	21.721	21.1221	21.398	20.8694	21.1445	21.2667	25.0279	30.0955	29.1815	29.1542	26.6819	27.1667	26.0616	32.8703	36.2726	26.4211
	9	17.1149	20.8564	21.3493	20.1417	20.8415	19.7209	21.0486	24.8125	31.5311	33.9316	32.467	28.9157	28.7032	26.0066	32.8642	30.6451	25.6483
	10	17.747	20.7508	22.743	21.5024	21.6475	22.2131	22.7044	24.039	31.2235	34.5518	32.2901	27.394	26.5272	24.7016	25.3061	23.5373	15.5575
	11	18.4618	22.0085	23.2791	21.3066	22.0736	22.3333	23.9738	23.4332	28.1295	29.2375	27.8834	26.1332	24.2239	23.4556	25.4771	23.4614	15.342
	12	17.7312	21.9337	22.5175	21.2836	19.8811	22.4537	23.6829	23.3087	23.1768	23.1699	23.7581	23.7604	22.1872	22.0861	24.8107	22.8953	15.2248
	13	15.7694	19.8169	24.0754	22.5401	20.3377	22.7763	23.3582	22.9051	22.0538	22.5885	23.2109	22.7332	21.6417	23.1202	25.485	22.801	14.1494
	14		18.2647	24.7014	24.0858	21.9197	23.7409	24.5772	23.3024	21.7547	22.4127	23.5875	25.0433	24.4984	25.5742	26.3428	21.6926
	15			23.7448	24.7005	22.6277	23.3709	24.2979	22.8683	20.2586	19.1734	21.8251	25.8036	25.075	24.5843	23.6094
	16				23.6377	22.7814	23.5396	23.7197	21.3814	17.4837	16.9458	16.8204	20.8933	22.6407	21.8681
	17					17.2711	19.4288	19.5839	16.9421	13.1546	12.582	13.0489	14.8932	16.633
2	1					14.1634	16.7929	20.3772	21.4071	19.6731	21.9895	20.9516	18.0405	18.3406					2																		2
	2				18.6585	19.0756	21.8103	25.5884	25.8726	25.0887	27.1942	26.1161	22.6785	20.5174	21.3184
0.00356232	3			20.2969	22.0279	22.6467	24.1444	26.6713	24.9545	20.2194	24.058	25.9497	21.7229	20.5238	21.6264	20.7364
	4		16.2273	20.057	21.9031	24.4553	26.0017	27.3328	25.2933	21.4063	21.2649	22.3725	19.9668	19.1461	22.1694	22.1715	23.098
	5	16.7087	18.9187	21.3503	23.543	25.6821	25.6973	25.7508	25.9565	23.6338	22.5329	22.6204	20.335	19.6343	22.9309	24.855	25.5563	20.5782
	6	20.6189	22.1128	21.5334	23.692	25.6104	24.619	23.5828	26.0297	24.8485	24.14	23.806	20.8836	21.524	23.0115	25.6346	26.1277	20.5733
	7	19.566	22.2139	20.4942	22.5482	23.5596	22.6095	22.3043	25.6063	26.4658	24.5602	22.9476	21.8902	23.1271	23.426	32.7796	32.3404	27.8802
	8	17.3077	20.5348	19.1838	20.9885	22.2224	21.4751	21.4992	24.5164	29.2638	28.3651	26.7831	23.7894	24.4073	25.8377	34.1077	37.2763	27.3738
	9	15.8443	19.0687	19.806	20.3713	21.9819	21.652	22.0922	24.7696	31.115	33.5352	29.1614	26.3284	26.8648	25.8174	33.0862	31.4084	25.9887
	10	16.4119	20.4068	22.1238	21.549	23.0557	23.7264	23.1599	24.2577	31.5578	33.3395	30.6556	25.6985	26.0032	24.382	24.3607	23.7853	16.6016
	11	18.6477	22.017	23.0733	21.1149	22.8262	24.1275	24.9869	24.3736	28.8264	28.771	27.0489	25.3905	23.7432	22.6963	25.2335	23.6268	15.9582
	12	17.5349	21.4027	22.3289	21.0918	19.8331	21.9135	24.0548	22.6266	23.5105	24.784	24.3716	24.3227	22.3874	22.0096	23.9584	23.153	15.1042
	13	15.2321	18.8265	23.5429	22.2787	20.1623	21.6046	22.9548	22.2974	22.3423	23.6742	24.4937	23.2547	21.5256	22.6448	24.316	21.9044	13.7604
	14		17.9812	24.5578	24.5033	22.1626	23.4796	24.1974	22.6134	22.75	23.4042	24.8558	25.5268	23.9551	24.9935	25.1732	20.7268
	15			24.8175	25.1769	23.6076	22.846	23.8909	22.664	21.7847	20.4845	22.9859	25.9375	26.4372	25.6743	23.5406
	16				23.54	21.8284	21.945	22.2251	21.3812	19.6781	18.6983	18.5412	22.1085	24.0371	22.3601
	17					16.8271	17.9019	18.3312	16.7074	15.6693	14.351	15.1656	16.8787	18.5008
3	1					14.9861	17.945	20.1708	21.5571	19.6918	21.1861	20.6136	18.4439	18.1258					3																		3
	2				19.463	20.0698	23.2729	25.8283	25.9319	24.9777	26.6314	26.7305	23.1928	20.2096	20.9279
0.00373946	3			20.1209	21.5913	23.0713	26.5182	28.0716	25.1689	20.2187	23.985	26.4875	21.8474	20.0945	21.5329	20.0228
	4		16.4387	19.6581	21.7358	24.7017	27.825	28.1317	25.7181	21.7954	22.1904	23.5199	20.4319	18.6807	22.2985	21.895	21.7249
	5	16.3926	19.586	21.2232	23.0172	25.5928	26.882	26.4072	26.8126	24.2492	23.6852	23.4759	21.3393	19.9131	23.3722	23.776	23.7451	18.5987
	6	19.9155	21.564	20.4692	23.827	25.1028	24.4061	24.2367	26.563	26.229	24.4975	24.1571	22.3377	21.7997	24.1052	24.1642	24.6016	18.92
	7	19.2207	21.3161	20.7836	22.4836	23.6383	21.7585	21.8478	26.4559	26.6256	25.4489	24.2853	23.0713	24.7409	25.1889	31.9416	31.4715	26.3466
	8	17.399	21.0115	21.1382	22.2799	21.8189	20.8801	22.5048	25.1846	29.4491	28.4227	27.3738	24.2694	26.0491	26.3957	32.5557	36.4941	26.6092
	9	15.8636	19.7095	21.2007	20.9624	21.6846	20.8052	21.7856	24.7131	30.0049	34.135	30	27.0579	27.6931	25.7041	31.4702	31.383	25.457
	10	18.223	21.7708	23.6159	21.6046	22.7964	22.9503	23.9535	24.6667	30.4535	32.8297	31.3123	27.1181	26.7159	24.8938	24.8474	25.0175	17.1876
	11	19.5823	22.4229	23.1445	22.1593	22.5661	23.7237	24.7018	23.7946	27.4681	29.0164	28.3225	26.1737	25.0869	23.923	26.5488	24.5799	16.5495
	12	17.9	21.9592	22.6178	22.4692	21.0872	23.2617	24.5955	23.7222	24.1465	24.9289	25.2186	25.8585	23.5166	23.2453	25.6146	24.9253	16.046
	13	15.9846	19.2309	23.3149	22.9739	20.8495	23.5728	23.8339	23.0063	22.9953	24.4256	25.3712	23.9856	22.0094	22.3286	25.1133	23.5089	15.4626
	14		17.8414	23.7233	24.4934	22.3703	24.3817	24.8756	23.3126	21.1236	22.5528	24.2254	24.4364	22.8785	24.504	25.3176	22.5661
	15			23.9569	24.1595	22.478	23.6522	24.7744	23.5997	20.5633	20.2492	22.4585	24.9858	24.6397	24.1264	23.0311
	16				24.0815	22.2799	24.2568	23.849	22.6448	18.9141	17.4482	18.1633	21.1478	22.9755	21.8468
	17					18.2492	19.607	19.6776	18.2227	15.2412	13.6784	14.2465	15.6223	17.8288
4	1					15.3563	18.2522	20.3052	20.8907	19.4331	21.1716	19.8675	18.9576	17.7538					4																		4
	2				19.3474	19.8559	23.0423	25.0851	25.955	25.1595	26.1263	25.6353	22.2576	19.8629	20.0604
0.00333065	3			19.4652	22.1613	22.3927	25.5385	27.5554	24.868	21.4319	23.7342	25.0489	21.4482	20.202	20.6906	20.2928
	4		17.6017	20.2264	22.7025	25.2326	27.9668	27.2586	25.6717	22.3355	20.599	22.4071	19.2467	18.2136	21.7318	21.9412	21.7395
	5	17.8035	19.7036	21.799	24.7696	27.1801	26.2363	26.1328	27.1333	24.2044	22.7632	21.9459	19.6469	19.649	22.4397	24.4951	23.7634	19.5312
	6	19.8713	20.9751	20.3627	24.6326	26.6437	23.9686	23.1496	26.2397	26.2402	23.8761	22.7291	20.5941	20.4573	23.0345	24.6426	24.9529	19.1398
	7	19.6695	21.5844	19.8872	22.7488	23.7877	20.7323	21.1006	26.0547	26.7708	24.1912	23.2475	22.4604	23.2413	23.5158	31.7624	31.8972	27.0387
	8	18.7917	21.4586	20.8342	21.1131	22.0964	20.4204	21.6003	25.2311	29.7504	28.6644	28.5415	25.11	25.5641	24.9196	31.9967	34.725	26.521
	9	16.5315	20.2483	20.4309	19.5138	20.9593	19.9398	21.9222	25.1944	31.2674	34.7734	30.6595	28.1042	27.1201	26.025	31.2619	31.1792	25.3748
	10	17.8608	21.0017	22.8361	21.0457	22.1387	23.6737	24.4381	25.0608	31.9053	33.7878	31.6544	26.3322	25.5299	23.9869	24.6398	24.1683	16.4703
	11	18.3448	22.3105	23.599	22.0526	23.4013	24.6912	25.5411	25.2062	28.22	28.5544	27.2512	25.0985	23.6803	22.6377	25.9952	24.7002	15.8177
	12	17.2917	22.3515	23.102	22.4992	20.71	23.1895	24.7792	24.0854	23.2672	23.8882	24.1424	23.0993	21.9745	21.5391	25.7621	24.803	15.8907
	13	16.2768	20.4115	24.2798	23.4219	20.9659	22.5508	22.9577	22.3774	22.1906	22.6071	23.2276	22.5032	20.2196	22.4414	26.3377	23.8756	14.4607
	14		18.088	24.3916	24.9435	22.5931	22.7409	23.6765	21.266	19.5349	21.0145	23.4525	24.1374	22.5161	23.7886	25.3867	21.901
	15			22.9842	24.4801	21.4563	22.1314	22.1029	20.9111	18.9465	18.7053	21.9984	24.4917	24.8576	24.3733	23.615
	16				22.5686	20.3727	21.8689	21.0274	19.8965	16.807	17.1975	18.6835	21.6845	23.4245	22.4349
	17					15.9967	17.6412	17.4751	15.5405	13.904	13.0271	13.8652	16.024	18.1743
5	1					15.0035	18.445	20.8854	21.4771	20.5448	21.7414	21.1542	20.152	19.4632					5																		5
	2				18.7281	20.6055	23.7465	26.2754	25.8417	26.2334	27.4482	27.5042	23.9867	20.9046	21.282
	3			19.0105	21.1489	23.2735	26.2266	27.5348	24.8735	21.2437	24.426	27.3161	22.9867	20.3977	21.2726	19.9511
	4		17.1154	19.2101	21.818	24.5346	27.4747	28.3744	24.9455	22.5712	23.2206	25.165	21.4026	19.182	21.5343	21.7516	21.9026
	5	16.9078	18.8638	20.7394	23.4647	25.1132	26.4872	26.421	26.6982	26	25.6902	25.1786	21.2808	19.6131	22.0439	23.5554	24.0611	18.0483
	6	19.8088	21.1909	20.7299	23.2148	25.2483	24.8439	24.3252	27.0833	27.5153	26.5497	24.2422	21.8134	20.6127	21.8907	23.2885	24.3202	18.3301
	7	19.5389	21.9146	21.2146	23.3018	23.2701	22.0908	22.7094	26.9412	29.1613	26.9512	24.051	23.2668	23.0682	23.4967	31.5377	31.5498	26.2629
	8	19.0069	21.9868	21.2987	21.1137	21.1769	21.1974	22.0423	25.5307	31.0219	29.8164	28.3869	24.9832	25.6843	24.6383	33.0765	35.7946	26.5298
	9	17.1701	20.2596	20.4959	20.2431	20.982	20.1422	21.1447	25.0686	32.5856	34.6627	30.758	27.4188	27.0836	24.8494	32.127	30.9547	25.3016
	10	16.8731	19.99	21.0483	20.8224	22.3556	23.0614	22.9935	23.5219	31.6486	33.6376	31.64	26.0951	24.848	23.4984	24.0946	24.0602	15.5622
	11	17.9014	21.012	21.7264	21.074	22.0705	22.9673	23.9195	23.5877	27.4295	28.6283	27.724	24.3447	22.3097	21.5298	25.0453	24.2003	15.2258
	12	16.9641	20.7169	22.5391	21.2235	20.2797	22.0081	22.4722	22.1285	22.1707	23.1794	23.9585	22.9547	21.3728	21.5238	24.1074	24.4479	14.9919
	13	14.7784	19.517	23.7647	22.7957	20.2269	21.4642	21.8865	21.9151	21.178	22.6858	23.0753	21.9168	20.7233	21.782	24.3252	22.8803	14.2087
	14		18.189	24.0362	25.3388	22.9013	23.9606	23.4855	21.63	21.375	22.7245	23.8581	23.4928	22.1296	24.2419	24.0658	21.2989
	15			24.5507	25.4851	23.3213	23.4428	23.5837	21.4326	19.6215	19.5449	22.1372	24.7508	24.4784	23.6961	23.0874
	16				24.804	23.7326	24.466	23.4617	21.0455	17.9628	17.9471	18.1061	21.3043	23.0749	22.1774
	17					18.8056	20.2549	20.3328	17.707	14.6682	13.7859	14.2579	15.7792	17.0287
6	1					15.4708	18.1129	20.2977	20.8627	18.7862	20.7812	20.7466	17.8851	17.5748					6																		6
	2				20.6261	20.3474	24.1492	25.9277	25.5296	25.5873	26.8881	27.017	22.6946	19.5601	19.9018
0.00328783	3			20.5052	23.2565	24.3542	27.0173	27.6707	24.7385	21.1729	24.1622	25.83	22.105	20.1389	21.0461	19.6193
	4		16.91	19.768	23.6086	24.9744	28.0504	28.1438	25.4472	21.1803	21.6829	24.6711	21.2902	19.062	21.9282	21.4023	20.6311
	5	16.9073	18.8855	21.3138	24.6879	26.8143	28.0017	27.4825	26.4417	23.8023	23.1562	23.8468	22.0914	20.2818	22.2098	23.5761	22.9785	18.2228
	6	20.5455	21.049	20.7588	24.0286	26.0733	25.367	25.4885	26.5497	25.8382	24.0951	23.6457	22.4228	21.3723	22.8576	24.0391	23.9273	18.2533
	7	20.4207	22.6288	21.3494	23.4161	24.4917	23.5016	22.6393	26.9052	26.9263	24.3098	23.9557	23.0467	23.0033	23.8319	31.9461	31.1875	26.5855
	8	19.4693	22.0637	22.2125	22.5025	23.3067	23.0049	23.032	25.257	29.4782	29.2277	28.9013	23.7983	25.2834	25.5731	32.7586	35.7646	26.3718
	9	16.2564	19.5294	21.5759	21.9525	22.4686	21.9838	22.1212	23.8606	30.4586	34.5638	30.5293	27.0582	26.6944	25.3168	32.0602	30.4089	24.7928
	10	17.1088	19.7584	22.3822	21.4319	23.1757	24.4146	22.6088	24.0195	31.3482	33.6027	31.699	26.141	25.6519	23.4463	23.5065	23.7218	15.6285
	11	19.3124	22.0687	23.1963	21.3028	23.1841	24.1762	25.3002	23.7317	27.8502	29.6353	28.4225	25.3563	23.0358	22.4133	25.0324	23.7618	14.8485
	12	18.1007	21.9052	22.2988	21.6392	20.549	23.7923	24.5512	22.5211	22.1802	23.8249	23.8271	23.6296	21.6656	20.8371	24.5148	22.4787	13.7724
	13	15.3339	20.1635	24.5109	22.6951	20.4306	22.4309	23.3208	21.7005	20.7891	22.0321	22.6058	22.4888	19.9857	21.6396	24.6183	21.4688	12.7812
	14		19.0225	25.6079	25.9543	22.4372	23.6727	24.0049	21.8935	20.5343	20.5517	22.4419	21.7901	21.3806	23.843	24.1705	20.391
	15			25.3983	24.9408	22.0392	23.2812	23.7308	21.4906	18.5732	18.6221	20.5753	23.1897	23.8571	23.1871	22.4933
	16				23.1388	21.6445	22.3997	23.035	20.8177	16.884	16.4534	17.5284	20.5	22.2096	21.2137
	17					17.2455	18.5342	19.2476	16.5141	14.2207	13.0549	13.5959	15.0584	16.8274
7	1					14.3816	17.545	20.3286	21.9787	20.2776	21.7215	20.8967	18.6831	18.3993					7																		7
	2				19.3445	19.7513	22.9681	26.2282	26.7303	26.2557	28.0601	27.369	24.0118	21.1559	20.5815
	3			19.7522	21.5657	22.5385	26.5437	26.5466	24.7221	21.4259	23.8972	27.1068	22.94	20.3812	21.5576	20.2484
	4		16.3009	19.5061	22.6038	24.1446	26.7113	26.9233	24.2741	21.5591	23.2097	24.5632	21.1213	19.0674	21.9015	21.8874	22.8127
	5	15.9078	18.6066	21.4085	24.1813	24.9983	25.1431	24.626	24.5917	23.6294	24.6926	24.6845	20.6814	19.6056	22.7169	24.8951	24.4933	19.2455
	6	18.9237	21.3135	21.4041	23.3746	24.6587	22.7183	22.7133	25.4433	25.0461	25.2449	23.7804	21.5852	21.0201	23.8918	26.1073	25.3888	19.1961
	7	18.9478	22.1143	21.7083	23.6341	22.6884	21.3262	21.8325	25.8805	26.1891	24.4242	24.14	22.7256	23.1931	24.1841	32.8926	31.9136	27.0948
	8	18.7344	21.686	21.363	21.603	22.0217	21.168	22.4499	25.2332	29.1169	28.3111	28.5707	25.0337	25.7315	25.8481	32.3557	36.0138	26.6417
	9	16.4889	19.8564	20.2663	19.925	21.5281	21.7977	21.9441	24.5075	30.2401	34.5666	30.4857	27.5796	27.8796	26.3641	32.0311	30.4662	24.9034
	10	18.0427	21.399	22.404	21.802	23.467	24.4142	23.4701	24.2222	31.2113	33.415	30.6857	26.3483	25.9753	24.8101	24.9722	23.8548	14.872
	11	18.8825	22.1424	23.0447	21.7957	23.99	25.4007	24.7112	24.1678	28.1018	28.8926	27.0659	24.3051	22.9541	23.2706	25.6029	23.739	13.9886
	12	17.1667	21.2526	22.47	21.6455	21.777	23.8361	23.7628	22.7578	22.8049	24.0972	23.7006	23.0912	21.4928	21.7242	24.5783	23.2046	14.0065
	13	15.9741	20.1024	23.5927	22.3069	20.1605	22.5372	22.0698	21.9839	22.1749	22.241	23.1677	21.6365	19.9968	21.0867	24.0967	21.814	13.4943
	14		18.4948	24.0889	24.2248	22.3519	22.915	23.1392	21.4864	20.5828	21.2752	22.61	23.3829	22.3008	24.2049	23.8752	20.0348
	15			23.7135	24.3345	22.4663	22.5041	23.2295	21.3802	19.4864	18.6151	21.534	23.5359	22.9	22.9521	22.1167
	16				22.8591	21.0428	22.7857	22.5529	20.9088	17.5935	17.5844	17.9621	20.752	22.196	21.9112
	17					16.4061	17.8473	17.7737	16.7997	13.9906	13.3789	15.1495	16.6736	17.75
8	1					15.3217	18.3616	20.4494	21.078	19.5426	20.9793	19.9031	18.1462	17.7869					8																		8
	2				20.2715	19.9844	24.0667	25.5397	26.0347	25.0052	26.5484	25.4974	22.1003	20.5393	21.4033
0.00339067	3			20.5865	22.6213	23.7217	25.5945	27.3868	23.9539	21.0435	24.0333	25.7676	22.3909	20.9546	21.9182	20.8599
	4		17.8094	21.5043	23.5648	25.9017	27.8408	28.019	24.2705	21.6252	22.4489	24.8715	20.8421	20.1466	22.7635	23.7561	22.6572
	5	17.8325	19.7098	22.439	24.851	27.059	27.688	26.7944	26.195	24.4567	24.1717	24.3189	21.785	21.1775	23.9011	26.1055	24.8226	19.55
	6	20.5609	21.7593	22.5419	24.7095	26.6079	24.7834	24.1532	26.1073	27.2172	25.5666	24.5898	22.3453	22.6478	25.2785	25.9176	25.5428	19.4058
	7	19.1252	21.796	21.2169	23.2348	24.2237	21.278	22.4061	26.6589	27.1002	24.7371	23.5041	22.9129	24.1582	25.9934	31.8754	30.9557	26.6196
	8	19.5239	22.2709	21.1012	21.781	22.021	21.2832	21.7605	24.9934	29.8253	28.8317	27.9983	24.6043	26.5025	27.6123	32.9206	34.9388	26.2023
	9	17.8071	21.1692	21.1783	20.8142	21.3355	20.6688	21.8722	24.0556	30.7326	34.0463	31.1212	27.1007	28.0542	27.2857	32.1158	30.5431	24.9305
	10	18.6966	21.98	22.8887	21.7059	22.2565	22.4815	22.5913	23.808	30.9274	34.1261	31.362	26.1792	26.5374	24.6803	25.2378	24.0554	15.9677
	11	19.8116	23.0254	23.1788	22.1175	23.1268	22.906	23.121	22.5575	28.6093	29.8053	28.2677	26.2619	23.8046	23.1276	26.5024	24.3909	15.4655
	12	18.4276	21.4324	22.4336	21.5351	20.8811	22.5712	22.4405	21.7637	23.0853	24.5277	24.6411	24.6035	22.0554	22.347	25.711	24.0427	14.6345
	13	15.3891	19.2027	22.9798	22.8964	20.7806	22.3746	21.7355	21.1547	22.5848	23.0514	24.4592	22.9793	20.4202	21.8674	25.7423	22.9036	13.1176
	14		19.3082	24.5823	24.7401	23.5082	23.6683	23.421	21.5844	21.1187	22.4163	24.3814	23.9491	22.9184	24.5776	24.8463	21.865
	15			24.3351	24.2753	22.3703	22.9577	24.1474	21.5453	19.7972	19.7608	22.6083	25.2802	24.9227	24.4547	23.4089
	16				23.0967	21.1659	22.7919	21.9952	21.1379	18.2085	18.3198	18.596	22.1987	23.8865	22.6783
	17					17.4376	18.689	18.5512	17.3678	15.0015	13.983	14.9669	16.4465	19.0815
9	1					15.1833	17.5658	20.2166	21.1953	20.3304	21.4983	20.9882	18.3132	18.9203					9																		9
	2				19.3133	20.0089	23.0844	25.8297	25.6088	26.5181	27.179	25.959	22.2845	20.5517	21.4706
0.00404611	3			19.2135	21.4311	22.4798	25.4314	27.4682	24.5492	22.2261	24.2007	26.2646	22.0957	21.0828	22.0326	20.7205
	4		15.8741	18.4494	21.955	25.3156	28.5053	27.7687	25.2346	22.9604	23.058	23.9355	20.9142	20.2952	23.1616	22.418	23.0791
	5	15.325	17.3924	19.5892	23.4675	26.8963	28.7072	26.0579	26.3537	24.9619	24.5083	23.9554	21.6776	21.224	23.4694	24.7632	24.9011	19.4246
	6	18.6457	19.6672	19.5492	23.2337	25.9684	24.5195	24.5654	26.0392	25.8533	25.613	24.4157	23.5977	22.892	24.0113	25.4599	25.3539	19.471
	7	19.6581	21.9601	21.7686	23.0543	23.69	22.138	21.4984	26.4727	26.5167	25.1364	24.654	24.505	24.5925	24.925	32.1553	32.0243	26.7955
	8	19.5883	22.609	21.5108	21.7361	21.9268	20.9951	21.4341	24.7242	30.121	28.7393	28.6312	26.384	27.2541	26.8939	32.8033	35.674	25.4051
	9	17.7104	20.4067	20.2332	19.8393	21.4562	21.0226	21.3397	23.5851	30.5131	34.5862	30.7306	29.2446	28.8129	27.4719	32.8088	31.141	24.5262
	10	18.7406	21.6324	22.4466	21.2208	22.785	23.7842	23.0399	23.1897	30.322	33.8027	31.8574	27.1886	26.4739	25.6236	25.6704	24.8973	16.1236
	11	19.6488	23.3098	22.8557	21.2557	22.1482	23.571	23.9256	22.4035	27.8032	29.9264	29.9123	25.8293	24.1929	24.2869	26.89	24.6892	15.9422
	12	17.1244	21.3132	21.823	20.871	20.1205	23.2797	24.2022	22.8657	23.554	24.6506	24.9139	25.1635	22.7293	22.9403	26.1136	24.4895	14.6268
	13	14.5464	19.2852	22.8206	22.1117	20.2569	22.2793	23.0128	22.9638	23.1266	23.8898	24.0624	22.9226	21.4257	21.9827	25.5072	22.8	13.8491
	14		18.4626	24.8268	24.1977	22.6884	24.2488	24.1408	23.489	22.0728	23.1984	24.125	24.3239	23.2261	24.2679	25.3081	20.6906
	15			25.6458	24.5865	23.1466	23.6415	24.6979	23.1577	20.7658	20.2309	23.4299	25.5439	25.9838	24.3098	23.2479
	16				23.7772	22.0645	23.8494	24.5786	22.3344	18.4634	18.1797	20.0475	22.7046	24.3578	22.7737
	17					17.1529	19.1946	19.7332	17.8055	15.0686	14.0814	15.6813	16.6466	18.651
10	1					15.059	17.1205	19.288	20.3766	19.6826	20.7403	20.3466	18.703	18.9324					10																		10
	2				20.103	19.9415	23.262	24.7117	24.9826	25.6604	27.0617	26.3116	22.8311	20.7483	21.2807
3.78956	3			19.7496	22.5632	23.7123	25.758	27.7407	24.2108	20.8167	25.0395	25.6828	21.5589	19.9752	22.1149	21.0813
	4		16.6237	20.3722	22.9913	25.5972	27.5386	28.0515	24.8176	20.9073	22.0017	23.3987	20.5854	19.5481	23.2349	23.4773	23.638
	5	16.6898	19.6287	21.5746	24.6938	27.2415	27.4305	26.1692	24.6821	23.5311	23.5396	23.6167	21.9116	21.4566	24.3013	25.2128	25.4026	20.1062
	6	19.5707	21.1608	20.6467	24.2898	26.6027	24.9868	23.4256	26.238	26.7471	25.6549	25.1333	22.601	22.9338	24.3138	25.4127	25.8731	19.1785
	7	19.1079	21.5698	20.3078	22.4619	23.4207	22.2152	21.6888	25.9302	27.4257	26.0067	24.7838	24.1157	23.8785	24.7579	32.7721	32.1445	26.3958
	8	18.3866	21.0883	21.1532	21.7702	21.7983	21.396	21.9243	24.2557	29.866	28.9801	28.9502	25.3289	26.3695	25.98	33.8548	36.481	25.9423
	9	16.0167	19.8562	20.0132	19.9329	22.0311	21.9395	21.7471	24.6585	30.7294	34.7653	31.5351	27.975	27.8758	26.9884	32.5578	30.3786	24.589
	10	18.0274	21.7681	21.8252	20.718	22.9886	23.6486	23.785	24.2468	32.0447	34.5928	31.9288	26.7644	26.9606	24.8864	24.9724	23.4126	15.19
	11	19.3062	22.1171	23.0796	20.6273	22.3504	24.5025	25.1133	24.1238	28.9677	29.3905	28.4455	26.2042	24.2783	24.1287	25.6993	23.7258	14.9839
	12	18.3938	22.4813	22.5283	21.0066	21.0725	23.9901	24.5719	23.4416	22.8036	23.8257	24.4609	25.1672	22.9693	22.9164	24.9418	22.9371	13.9303
	13	15.3935	19.3129	22.828	22.1504	20.4837	22.9643	23.6759	22.0892	21.7576	23.0292	23.6244	23.4103	21.5128	22.7884	24.7614	21.482	13.5845
	14		18.721	23.988	24.2074	22.2924	23.5238	24.4033	22.5482	20.548	21.7404	24.1971	23.8535	23.042	24.4035	24.6141	19.6969
	15			23.7359	23.421	21.843	22.3016	23.8214	23.2108	19.887	18.7586	21.8192	24.354	24.0968	24.1246	22.6866
	16				23.3205	21.3432	22.1951	22.6699	22.3083	18.1828	17.3609	17.8838	20.9199	22.5822	21.8306
	17					16.9314	18.2698	18.7933	17.5629	14.956	13.6429	13.976	15.6212	17.2427

## Sheet: BT
NumberOfStartingPointsBT
Signals of insufficient quality were excluded from the property maps. Signals could be rejected based on noise low amplitude, large artefact or ventricluar farfields that could not be substracted. Breaktrough can only be identified if a contiguous circle of electrodes enclose the electrode of interest. Therefore electrodes at the border or around a missing electrodes are excluded.
	1	1	2	3	4	5	6	7	8	9	10	11	12	13	14	15	16	17
1	2																		1																		1
	3						5	12	16	7	8	12	17
0.00342004	4						13	3	9	12	40	30	10	7
	5				8	19	20	9	41	9	11	24	5	14	13
	6			11	3	4	12	5	6	18	12	7	31	9	9	20
	7		23	34	4	15	27	16	25	19	12	10	9	8	25	18	16
	8		14	16	23	9	16	22	19	24	13	5	4	3	7	18	27
	9		11	29	37	15	24	24	33	11	15	8	9	15	18	23	30
	10		20	22	42	30	9	13	23	11	30	29	17	10	12	21	28
	11		16	24	20	19	22	23	30	24	67	25	13	10	14	8	11
	12		3	9	17	8	14	12	14	22	31	8	9	11	22	31	13
	13		11	7	13	10	21	14	6	22	16	12	14	7	17	33	18
	14			13	24	18	16	23	17	4	17	28	11	9	5	19
	15				17	13	27	18	13	11	20	30	21	8	14
	16					6	10	17	34	8	12	23	6	7
	17						19	14	32	30	14	18	6
	1
2	2																		2																		2
	3						8	10	9	16	12	16	16
0.00356232	4						7	4	19	6	31	40	13	4
	5				8	13	20	7	33	7	13	14	13	7	20
	6			8	6	6	8	3	5	13	15	10	29	11	23	20
	7		16	33	4	20	30	27	24	15	12	9	7	14	26	21	33
	8		10	15	29	15	30	37	29	24	14	4	5	4	8	24	32
	9		23	31	51	15	18	35	24	11	13	16	12	9	11	16	36
	10		8	27	43	27	16	16	7	13	39	38	12	7	18	25	37
	11		13	24	23	22	20	24	42	22	67	22	19	19	11	10	17
	12		2	13	19	10	25	14	14	17	36	12	15	3	19	30	8
	13		7	10	17	10	19	23	13	28	28	20	19	9	17	24	17
	14			5	22	18	11	17	12	12	23	29	7	6	20	19
	15				12	8	29	14	28	15	24	40	22	11	14
	16					9	13	22	30	11	13	20	11	9
	17						14	9	28	22	14	26	9
	1
3	2																		3																		3
	3						5	7	16	11	16	10	13
0.00373946	4						12	5	8	5	31	46	11	3
	5				4	10	22	10	26	16	20	16	16	2	18
	6			8	3	9	9	8	6	18	15	9	36	12	25	15
	7		24	36	4	16	16	21	23	18	9	6	14	15	26	19	18
	8		11	14	17	7	17	31	36	21	16	4	5	6	8	17	25
	9		12	28	31	22	21	15	25	10	14	13	7	4	13	13	40
	10		7	19	32	32	14	20	8	18	31	32	10	5	17	21	20
	11		14	17	24	19	17	25	26	20	70	28	11	12	8	7	14
	12		6	13	23	15	17	9	15	17	40	11	18	11	16	31	6
	13		8	14	22	11	15	15	10	23	22	22	19	12	21	32	20
	14			15	27	18	19	8	16	7	19	28	6	11	14	25
	15				13	5	18	19	17	14	16	29	12	8	9
	16					2	8	9	18	7	13	17	6	11
	17						15	12	27	11	12	16	7
	1
4	2																		4																		4
	3						7	12	11	15	15	12	16
0.00333065	4						12	6	11	8	37	43	13	5
	5				2	14	14	8	22	11	6	12	8	3	21
	6			10	2	5	7	12	3	18	10	9	26	7	16	23
	7		16	35	6	12	23	16	27	14	6	5	13	8	29	14	18
	8		8	20	21	16	18	30	28	13	22	4	8	5	3	14	18
	9		14	38	31	15	21	30	30	14	10	15	11	14	8	16	37
	10		5	13	38	19	18	12	9	15	48	34	14	6	21	31	27
	11		7	25	21	21	18	17	36	23	61	19	12	10	18	14	13
	12		10	12	19	16	26	15	17	13	30	14	6	4	19	43	10
	13		6	9	17	11	8	17	12	25	24	21	16	6	11	30	16
	14			15	36	21	11	16	9	4	21	21	7	3	7	9
	15				16	3	20	17	11	13	20	25	16	12	11
	16					7	13	20	28	7	14	17	10	11
	17						16	11	26	15	13	18	8
	1
5	2																		5																		5
	3						12	11	13	8	5	20	18
	4						10	4	9	8	40	47	13	8
	5				3	11	19	6	19	9	14	14	9	8	13
	6			10	1	7	8	12	7	24	17	12	28	5	16	16
	7		22	31	8	7	22	16	19	11	7	15	9	9	15	15	28
	8		14	21	16	20	32	27	23	20	21	6	5	5	2	14	27
	9		19	30	31	16	25	19	28	17	8	14	8	9	11	20	35
	10		7	21	37	29	18	10	11	10	30	30	10	9	13	15	29
	11		10	23	18	18	22	18	32	16	56	23	11	7	14	9	11
	12		5	7	13	10	17	9	9	13	31	12	15	9	19	19	8
	13		10	7	17	11	15	16	12	22	17	22	13	9	12	23	14
	14			15	20	17	19	11	13	10	9	24	10	8	8	19
	15				13	12	27	15	15	9	20	36	24	7	9
	16					15	7	14	17	11	12	19	6	13
	17						20	15	25	8	8	36	10
	1
6	2																		6																		6
	3						13	12	16	16	8	18	18
0.00328783	4						14	7	12	10	31	40	20	6
	5				3	9	28	9	22	13	15	22	9	5	19
	6			12	4	5	7	11	9	29	27	3	27	8	17	14
	7		18	29	6	7	28	17	24	15	8	13	11	9	23	25	26
	8		3	17	20	15	22	33	34	31	18	8	11	5	5	18	28
	9		21	34	34	12	28	26	35	19	12	16	13	13	18	21	20
	10		10	26	45	23	17	13	19	15	27	37	6	6	12	20	29
	11		17	31	27	25	23	20	24	13	63	26	13	17	6	13	14
	12		1	7	18	16	24	9	19	11	26	12	12	10	20	32	5
	13		10	6	16	7	15	24	12	14	24	16	13	7	8	33	11
	14			12	20	25	11	11	15	11	24	20	3	3	11	12
	15				9	5	14	25	20	11	22	30	13	10	8
	16					6	6	18	26	6	6	25	6	9
	17						18	10	42	13	13	20	9
	1
7	2																		7																		7
	3						4	13	14	15	11	24	17
	4						17	10	15	7	42	39	10	13
	5				4	18	21	10	27	11	20	13	7	5	17
	6			6	2	4	9	10	7	14	8	6	31	11	19	25
	7		21	33	4	13	21	13	20	17	14	12	10	7	25	12	26
	8		10	21	27	16	26	38	39	12	16	6	9	4	5	16	24
	9		11	27	32	18	17	20	32	15	14	15	7	10	13	15	29
	10		11	17	36	23	13	26	20	22	36	21	9	3	11	18	27
	11		11	27	26	26	20	17	30	22	59	22	16	6	16	8	9
	12		7	14	17	8	24	14	9	25	31	11	9	8	15	34	14
	13		11	5	17	9	18	15	10	28	14	18	6	13	12	23	15
	14			11	24	20	6	9	11	10	18	19	7	9	16	15
	15				9	7	24	29	11	9	23	26	13	10	10
	16					6	2	20	22	5	16	15	6	16
	17						23	16	28	12	6	13	6
	1
8	2																		8																		8
	3						5	8	14	21	13	13	17
0.00339067	4						22	4	11	8	45	25	15	11
	5				5	12	33	11	28	12	14	10	15	14	20
	6			8	2	7	14	8	5	22	16	3	29	12	20	27
	7		21	27	6	17	19	25	20	9	7	8	16	5	25	19	13
	8		12	22	22	20	21	38	34	17	12	1	3	5	13	23	10
	9		22	30	37	14	20	26	27	17	14	3	15	18	18	10	41
	10		7	17	36	29	12	12	16	8	30	33	14	3	19	16	21
	11		7	23	20	22	19	16	38	33	54	27	18	10	18	21	16
	12		3	13	16	10	14	17	11	18	33	5	11	14	24	34	4
	13		8	3	13	10	18	12	9	25	19	14	14	8	18	29	17
	14			11	20	29	24	12	14	8	18	17	10	10	23	14
	15				7	6	24	16	12	11	16	34	21	9	8
	16					8	12	12	24	8	9	10	4	9
	17						27	6	19	15	9	23	4
	1
9	2																		9																		9
	3						6	13	12	14	16	18	18
0.00404611	4						12	10	9	15	31	41	14	10
	5				7	13	19	6	30	9	11	16	8	8	22
	6			6	0	14	10	10	3	25	12	5	24	9	16	14
	7		16	35	4	22	21	17	23	26	12	9	9	15	24	12	18
	8		12	26	21	6	28	28	31	18	12	8	6	6	8	16	20
	9		13	25	31	10	16	25	33	20	19	9	12	16	17	12	28
	10		6	14	31	26	11	15	15	9	48	23	5	10	17	21	25
	11		10	33	16	15	19	22	26	22	60	21	10	12	9	6	18
	12		4	6	20	18	16	9	11	12	38	11	13	11	13	41	7
	13		7	11	10	3	15	13	11	17	24	21	17	8	13	27	13
	14			18	16	17	13	15	14	9	32	27	14	4	14	19
	15				10	3	14	24	11	10	17	38	12	8	15
	16					13	10	18	26	10	14	20	6	13
	17						24	23	32	9	11	19	4
	1
10	2																		10																		10
	3						6	17	12	20	10	19	15
9.14186	4						13	10	6	8	35	46	15	10
	5				3	13	27	11	17	11	19	15	9	4	21
	6			10	2	13	9	9	4	18	18	12	29	9	16	16
	7		22	30	6	12	18	9	12	17	12	10	15	7	18	12	26
	8		11	24	19	15	19	34	32	19	19	5	11	8	7	18	17
	9		13	36	30	17	17	27	24	14	11	12	12	11	20	20	33
	10		6	28	34	16	10	17	14	11	40	24	4	5	20	24	25
	11		12	36	17	15	27	13	24	18	77	19	5	14	13	15	14
	12		9	12	14	13	12	17	10	23	34	12	13	7	14	27	10
	13		14	8	13	9	12	13	11	22	22	18	10	14	19	30	11
	14			12	14	20	11	8	14	6	19	28	7	8	10	10
	15				7	5	15	14	20	11	21	28	13	10	11
	16					9	10	21	19	1	13	18	6	18
	17						18	13	32	20	11	20	7

## Sheet: FI
FractionationIndices
Signals of insufficient quality were excluded from the property maps. Signals could be rejected based on noise low amplitude, large artefacts or ventricluar farfields that could not be substracted. Fractionation index is particularly sensitive to noise. Therefore electrodes with substantial noise are more strictly excluded.
		1	2	3	4	5	6	7	8	9	10	11	12	13	14	15	16	17
1	1					2.76532	2.79537	1.29643	2.15548	1.92496	1.76256	1.34017	0.872054	1.94108					1																		1
	2				2.7672	0.813264	2.35677	2.08963	1.90592	1.37931	1.54701	2.52921	0.969697	0.913621	1.76833
0.00342004	3			1.55363	1.58304	1.4662	1.68458	1.85913	0.820946	1.53833	1.1412	1.64765	1.39	0.551724	1.67603	1.38033
	4		1.14886	0.923744	0.8	0.962199	2.14286	2.12263	1.82724	1.51987	1.3389	1.18771	1.15017	0.870704	0.932566	1.18476	1.92066
	5	3.19643	1.24694	0.73064	1.82564	1.47432	2.75298	1.68896	2.40232	2.62729	1.6594	1.3594	0.684124	1.1585	1.02936	1.27346	1.81803	1.24712
	6	3.50353	1.52211	1.13758	1.95819	2.015	1.88342	1.94118	2.17406	2.36594	1.2802	1.11093	0.767101	1.8191	1.2549	1.65366	2.03488	1.33388
	7	3.18998	1.30667	1.37789	1.83855	2.11424	2.15017	1.74267	2.23333	1.79299	1.46333	1.0197	1.69179	1.81333	1.98023	1.72459	1.89951	1.23203
	8	1.74655	1.25378	2.13545	1.85572	1.94215	2.83744	1.99675	2.26929	2.06198	1.33828	1.17745	1.66836	1.865	2.02163	1.7734	2.76603	1.28943
	9	1.96959	2.06845	2.16391	2.9028	1.69608	2.03284	2.31767	3.11349	2.25042		1.70558	1.90219	2.05396	1.79736	1.65139	1.67099	1.12642
	10	1.02886	0.882943	1.75788	1.96574	2.05574	1.97377	1.95074	1.8474	1.88576		2.57167	1.62252	1.61779	1.07419	1.80687	1.80195	1.00972
	11	2.03819	1.5365	1.6711	2.07377	3.81997	2.23039	1.78033	1.87134	1.76885	2.79402	1.37603	1.54605	1.4232	1.75822	1.93791	1.68144	0.880065
	12	1.91438	2.63946	1.87687	1.4765	1.59121	1.7122	1.70081	1.86334	1.60772	1.9902	1.62013	1.33227	1.6208	1.55024	1.74757	1.56312	0.812704
	13	1.50258	1.34068	1.59799	1.77741	1.22349	1.49271	1.953	1.34887	1.41772	1.68581	1.52077	1.62939	1.03344	1.60577	1.88333	1.58872	0.761047
	14		1.59516	1.86007	1.55941	1.70492	1.99505	1.80163	1.2848	1.22799	1.43175	1.52327	1.0016	1.36495	1.79032	2.11706	1.95946
	15			1.95455	1.6772	1.50906	1.87092	1.7037	1.69365	1.14577	0.739938	0.939587	1.2766	0.822186	2.02003	1.85017
	16				1.82638	1.63458	1.40388	1.56051	1.60897	0.862016	0.710526	0.623839	0.91879	0.907285	1.05509
	17					1.6175	1.50479	1.28165	0.996875	0.92272	0.667183	0.604724	0.638932	1.51923
2	1					2.80141	2.56786	1.22064	1.98399	1.91519	1.84468	1.37889	0.765599	1.82293					2																		2
	2				2.7588	0.768014	2.29965	2.09457	1.97935	1.3686	1.6323	2.83016	0.89899	0.952066	1.733
0.00356232	3			1.79167	1.73647	1.34095	1.59683	1.86783	0.806071	1.51424	1.29685	1.56281	1.35559	0.538588	1.74876	1.51895
	4		1.01222	0.972366	0.918685	1.02062	2.07168	1.86207	1.725	1.46766	1.29967	1.12081	1.13123	0.855501	0.90625	1.26861	2.0814
	5	2.94326	1.2699	0.670051	1.84708	1.48889	2.63946	1.79097	2.4214	2.45485	1.57504	1.4097	0.73399	1.24876	1.10362	1.45603	2.00497	1.47394
	6	3.38462	1.3266	1.02508	1.90863	1.93813	1.99015	2.00974	2.20593	2.25253	1.2968	1.05804	0.786885	1.60496	1.1954	1.79772	2.16418	1.42834
	7	3.09949	1.29187	1.23802	1.79734	2.22848	2.32516	1.80354	2.30565	1.69783	1.49331	0.967267	1.57737	1.64191	1.74178	1.86386	2.07818	1.27955
	8	1.74872	1.13245	2.03642	1.7977	1.89292	3.1113	2.02746	2.37993	2.11185	1.36184	1.16225	1.59701	1.72848	1.95695	1.89723	2.77966	1.28275
	9	1.64129	1.95645	1.93864	2.66172	1.82266	2.11382	2.35275	3.10294	2.31		1.54742	1.76451	2.08347	1.77632	1.67317	1.7299	1.1629
	10	0.852542	0.776271	1.62211	1.93301	2.1377	2.05537	2.07178	1.90438	1.93564		2.5624	1.6112	1.66288	1.11557	1.79871	1.70032	1.12097
	11	1.92573	1.35993	1.59833	1.94581	3.90066	2.29575	1.89869	1.89886	1.81672	2.54695	1.2708	1.60784	1.4386	1.75121	1.88245	1.70813	0.993569
	12	1.82112	2.57191	1.76461	1.37541	1.52537	1.76998	1.64355	2.04327	1.65862	2.00818	1.6462	1.48649	1.6	1.45136	1.6464	1.4686	0.879808
	13	1.34923	1.37075	1.54286	1.7082	1.20617	1.52941	1.7371	1.40193	1.41325	1.71268	1.61905	1.62184	1.02077	1.5264	1.65478	1.59157	0.813099
	14		1.48889	1.81293	1.5897	1.81773	1.94617	1.65858	1.34984	1.37107	1.60064	1.49604	0.903785	1.35313	1.75243	2.03268	1.80325
	15			1.91053	1.63306	1.52053	1.72609	1.59711	1.62303	1.24805	0.786378	1.12088	1.33974	0.791733	1.79316	1.86899
	16				1.68667	1.45752	1.27023	1.48875	1.48804	0.942457	0.772939	0.763608	1.05031	1.07568	1.13735
	17					1.47267	1.42765	1.2973	0.960876	0.946708	0.659906	0.712934	0.667717	1.69342
3	1					2.77391	2.58156	1.16726	2.05536	1.85989	1.81565	1.28983	0.867672	1.79305					3																		3
	2				2.72711	0.841187	2.26232	2.29912	1.95986	1.34477	1.57509	2.51356	1.00329	0.89604	1.64754
0.00373946	3			1.66034	1.53739	1.33565	1.7227	1.9459	0.787162	1.53756	1.18937	1.67055	1.4262	0.628664	1.61349	1.46417
	4		1.01382	0.868376	0.823834	0.981034	2.14905	2.15945	1.76783	1.47525	1.37914	1.13245	1.24302	0.964344	0.800979	1.17286	1.8657
	5	3.01761	1.29131	0.672819	1.9622	1.43952	2.67791	1.74056	2.35987	2.52843	1.59259	1.3777	0.810065	1.27049	1.06958	1.28734	1.74838	1.3734
	6	3.42241	1.3771	1.02995	1.89684	2.07794	1.89644	1.94847	2.07038	2.13131	1.27919	1.08511	0.857143	1.7813	1.18285	1.59512	1.95122	1.4688
	7	2.96944	1.32612	1.23443	1.78289	2.24386	2.25926	1.84455	2.39601	1.86509	1.50921	1.04214	1.79104	1.71287	1.7329	1.71104	1.93964	1.32432
	8	1.59083	1.0972	2.08224	1.92308	1.81566	3.15073	1.99522	2.46242	2.15526	1.52796	1.18525	1.68926	1.74468	1.9491	1.73183	2.75382	1.39873
	9	1.84848	2.11519	1.99021	2.84124	1.76585	2.21095	2.32	3.11183	2.27869		1.60992	1.80464	2.0396	1.82439	1.69887	1.76122	1.23408
	10	1.01498	0.965116	1.66775	2.10621	2.23616	1.97436	1.90064	1.88889	1.97879		2.71096	1.60841	1.79775	1.16957	1.72496	1.80383	1.09062
	11	2.08666	1.4726	1.68637	2.05419	3.92007	2.40872	1.94577	1.79459	1.85463	2.6459	1.27229	1.78084	1.5387	1.80578	1.9328	1.81789	0.99681
	12	1.93621	2.70238	1.71499	1.44156	1.56704	1.89499	1.90209	2.02381	1.72134	2.05493	1.87781	1.61208	1.60032	1.44654	1.61624	1.64448	0.936508
	13	1.3476	1.3073	1.54104	1.77614	1.33981	1.64401	1.97923	1.37264	1.57277	1.78165	1.7408	1.75598	0.965354	1.48025	1.71197	1.562	0.81558
	14		1.52241	1.86248	1.49508	1.74388	2.03752	1.82935	1.30949	1.30757	1.54173	1.52857	0.970173	1.24763	1.67255	2.00163	1.83034
	15			1.96552	1.54441	1.46982	1.77939	1.64038	1.61682	1.18056	0.674312	1.05164	1.25	0.825397	1.85057	1.88033
	16				1.93178	1.48544	1.37881	1.56598	1.66354	0.863497	0.704791	0.665639	0.984277	1.04731	1.1631
	17					1.61022	1.63074	1.37539	1.06144	0.956989	0.658499	0.691108	0.670279	1.54747
4	1					2.73545	2.65653	1.30162	2.01254	1.94894	1.8021	1.38554	0.877966	1.72513					4																		4
	2				2.57848	0.745167	2.42681	2.16312	1.83737	1.33962	1.54437	2.3613	1.00847	0.894649	1.67282
0.00333065	3			1.66028	1.45035	1.28621	1.62937	1.84886	0.8511	1.45546	1.12957	1.53626	1.32107	0.584437	1.55853	1.3273
	4		1.13565	1.03596	0.846831	1.00347	2.08566	2.19483	1.68667	1.59635	1.27517	1.14358	1.11833	0.865894	0.806291	1.20425	1.93445
	5	2.97391	1.46167	0.78057	2.03316	1.58491	2.89384	1.91261	2.425	2.53099	1.57751	1.33784	0.69637	1.21854	0.98843	1.25163	1.87416	1.36513
	6	3.39478	1.46269	1.18303	2.07215	2.06218	1.9868	2.08293	2.32893	2.18569	1.19694	1.05351	0.806931	1.59966	1.1727	1.67049	2.05546	1.27154
	7	3.07966	1.39238	1.41791	1.94417	2.24212	2.25287	1.94318	2.46932	1.80475	1.41794	0.981728	1.74536	1.54409	1.72471	1.77393	1.95688	1.19677
	8	1.64888	1.27318	2.1757	1.90492	2.05065	3.07882	2.04334	2.40164	2.18166	1.43573	1.07973	1.735	1.7371	1.99832	1.86304	2.69831	1.2589
	9	1.81261	2.11074	2.10033	2.77073	1.73779	2.27317	2.47326	3.24346	2.36047		1.63802	1.84034	1.98816	1.73544	1.72488	1.77036	1.13238
	10	0.865874	0.880471	1.77377	2.08972	2.12235	2.02435	1.94137	2.00657	1.8887		2.36409	1.55482	1.43854	1.05419	1.70559	1.79575	1.00481
	11	1.90345	1.29674	1.69884	2.02796	3.71642	2.29412	1.89967	1.82488	1.86864	2.57286	1.3157	1.51419	1.39315	1.562	1.80515	1.81878	0.903226
	12	1.80556	2.47952	1.81773	1.39444	1.62109	1.86275	1.68699	1.9688	1.58689	1.9852	1.70049	1.39739	1.48166	1.40829	1.61712	1.57947	0.799035
	13	1.26644	1.24306	1.59585	1.7691	1.30569	1.46557	1.88599	1.31452	1.36971	1.56981	1.5252	1.46452	0.894155	1.48475	1.72623	1.5937	0.757624
	14		1.43134	1.74301	1.54983	1.75783	1.83828	1.63072	1.1859	1.16349	1.55305	1.35588	0.908946	1.2283	1.69431	2.02833	1.72607
	15			1.77368	1.62292	1.43657	1.54187	1.47749	1.49365	1.00945	0.619122	1.01282	1.17492	0.774141	1.8	1.74833
	16				1.70401	1.4023	1.19256	1.38871	1.26115	0.751196	0.603476	0.65981	0.825243	0.943615	1.10321
	17					1.37705	1.42695	1.20225	0.914149	0.8528	0.611465	0.614767	0.562998	1.5
5	1					2.61189	2.75887	1.3545	2.07923	1.90685	1.88621	1.36102	0.974662	1.85786					5																		5
	2				2.58772	0.82872	2.54545	2.21754	1.95478	1.38842	1.56706	2.65705	1.03161	1.00164	1.72951
	3			1.50615	1.47986	1.43031	1.66436	1.94077	0.846543	1.5626	1.20724	1.66556	1.46269	0.569558	1.6913	1.38336
	4		1	1.09028	0.760832	0.958478	2.03839	2.05299	1.86304	1.67053	1.44113	1.17333	1.22772	0.819672	0.861111	1.2013	1.93894
	5	2.95567	1.21897	0.673435	1.7642	1.49228	2.82283	1.82363	2.6733	2.65672	1.8064	1.40568	0.819376	1.18525	0.969106	1.21498	1.82508	1.21417
	6	3.38246	1.27872	1.10067	2.01678	2.07483	1.87375	1.99353	2.2549	2.44237	1.26307	1.10544	0.761047	1.71619	1.13051	1.61967	1.90476	1.2818
	7	3.19862	1.36181	1.3777	1.82919	2.24161	2.17018	1.84729	2.34118	1.78268	1.46633	0.930921	1.69799	1.69884	1.80065	1.74918	1.96411	1.22742
	8	1.71552	1.23471	2.23432	2.00494	1.84903	2.92105	1.93984	2.267	2.12816	1.40067	1.18593	1.71022	1.7438	2.03	1.66775	2.82683	1.25926
	9	1.79252	2.0416	2.1675	2.74062	1.76471	2.16176	2.31057	2.98693	2.40436		1.6437	1.87605	2.04682	1.65957	1.57655	1.77023	1.0871
	10	0.930626	0.861204	1.7	2.07566	2.10114	1.82391	1.80065	1.88493	1.97537		2.52	1.51803	1.45098	1.07097	1.66506	1.68618	0.982229
	11	1.85211	1.34305	1.56385	1.94243	3.70656	2.23039	1.76683	1.72565	1.79508	2.6102	1.23052	1.48706	1.28065	1.4686	1.8479	1.73453	0.858065
	12	1.73504	2.51864	1.63394	1.47798	1.67317	1.7189	1.56699	1.92683	1.55122	1.97553	1.66188	1.37379	1.3808	1.3381	1.5	1.56189	0.829032
	13	1.31615	1.30612	1.5395	1.67051	1.33387	1.52932	1.78768	1.26923	1.3748	1.57576	1.50481	1.5264	0.894654	1.47709	1.62945	1.52623	0.797735
	14		1.43814	1.9569	1.64463	1.85691	1.97373	1.76452	1.16427	1.16094	1.51592	1.32903	0.936	1.2736	1.63387	1.86842	1.73563
	15			1.87937	1.7798	1.52951	1.72303	1.53429	1.5047	1.09034	0.73839	1.0205	1.2411	0.7824	1.68627	1.84538
	16				1.91792	1.63047	1.38673	1.53035	1.46238	0.855814	0.662519	0.702028	1.01109	1.05212	1.13433
	17					1.73856	1.74026	1.49841	1.06512	0.925581	0.6375	0.702532	0.650078	1.54386
6	1					2.69611	2.86941	1.33155	2.16043	2.0477	1.97917	1.43367	1.00338	1.73277					6																		6
	2				2.63316	0.945326	2.68206	2.25397	1.97561	1.41952	1.67642	2.50594	1.04195	0.896211	1.63727
0.00328783	3			1.70833	1.58639	1.36285	1.60208	2.09532	0.979626	1.49322	1.25585	1.6835	1.29833	0.576797	1.55354	1.26634
	4		1.19377	1.1134	0.756897	1.06496	2.15304	2.30651	1.67337	1.40735	1.40101	1.15282	1.19672	0.771615	0.845024	1.0624	1.90317
	5	2.90196	1.42051	0.83557	1.91552	1.52641	2.97094	1.80968	2.51	2.37856	1.50424	1.29293	0.830343	1.18241	0.964228	1.18331	1.78512	1.29593
	6	3.4528	1.45439	1.1541	1.84538	1.97833	1.95269	2.14754	2.2351	2.18569	1.1528	1.08609	0.78374	1.67875	1.19804	1.55049	1.91901	1.29902
	7	3.18966	1.2709	1.27787	1.90132	2.28667	2.3541	2.04992	2.32779	1.72529	1.43771	1.02791	1.67	1.68421	1.73211	1.70915	1.89309	1.17097
	8	1.54437	1.25796	2.21252	1.9157	1.88167	3.24838	2.1408	2.43493	2.02685	1.35809	1.17928	1.58333	1.74794	1.8887	1.646	2.71134	1.18831
	9	1.76231	2.05378	2.21207	2.77049	1.89934	2.3958	2.57674	3.08752	2.38245		1.63987	1.74043	1.96179	1.65017	1.57073	1.63875	1.02773
	10	0.884354	0.862416	1.65733	2.10133	2.23153	2.1935	2.03601	1.88111	2.06436		2.59866	1.51311	1.53366	1.0342	1.60161	1.59902	0.89198
	11	1.89529	1.44845	1.66946	2.11948	3.89718	2.30669	1.87113	1.87154	1.94364	2.60891	1.30506	1.47291	1.33821	1.57536	1.74716	1.56444	0.801303
	12	1.97049	2.62586	1.79633	1.45146	1.61765	1.77456	1.74959	1.93831	1.56006	1.9018	1.59128	1.36232	1.46497	1.38818	1.53607	1.42131	0.741463
	13	1.29776	1.30293	1.58655	1.90328	1.36129	1.58699	1.88274	1.31401	1.44249	1.67628	1.52564	1.34026	0.896497	1.42903	1.65905	1.55921	0.745543
	14		1.56228	1.95164	1.60196	1.85155	2.03764	1.71799	1.24642	1.081	1.37202	1.29677	0.82035	1.16935	1.66667	1.99172	1.8203
	15			1.90957	1.55592	1.61601	1.68257	1.51603	1.52673	1.04829	0.646967	0.882726	1.05627	0.743506	1.74834	1.75753
	16				1.71906	1.48539	1.32686	1.5207	1.51347	0.816614	0.667702	0.630915	0.866987	0.971947	1.01503
	17					1.53571	1.48208	1.26688	0.959248	0.885759	0.562009	0.608558	0.559937	1.39677
7	1					2.82155	2.89048	1.35	2.09059	1.98399	1.94746	1.4716	0.931857	1.78511					7																		7
	2				2.72615	0.931217	2.66667	2.34403	1.92294	1.45043	1.6323	2.59655	1.02353	0.895522	1.60461
	3			1.64675	1.51138	1.38986	1.65385	2.00527	0.898799	1.43939	1.17413	1.68781	1.305	0.589109	1.58882	1.49342
	4		1.07597	1.0718	0.717277	0.936317	1.98261	2.12718	1.77327	1.59068	1.43594	1.10345	1.21262	0.896382	0.855501	1.19413	2.05518
	5	2.96454	1.33741	0.634188	1.81514	1.4494	2.77513	1.72955	2.35167	2.4591	1.70946	1.40735	0.80624	1.25908	1.00327	1.30328	2.01667	1.28758
	6	3.37435	1.32198	1.20204	1.99322	1.94198	1.905	2.04778	2.165	2.30887	1.25169	1.10815	0.84918	1.68395	1.16721	1.75908	2.04119	1.31118
	7	3.2087	1.44027	1.35245	1.95784	2.20101	2.17384	1.87154	2.3468	1.8569	1.44949	1.00659	1.6633	1.64026	1.78773	1.8314	1.96678	1.18954
	8	1.61872	1.17235	2.14958	1.866	1.925	2.88468	2.00493	2.40436	2.15085	1.35108	1.2579	1.75717	1.79362	1.92988	1.65902	2.78485	1.27199
	9	1.81601	1.96453	1.94975	2.69167	1.88576	2.57072	2.57895	3.21131	2.44371		1.61383	1.74037	1.95318	1.78418	1.61311	1.83196	1.07246
	10	0.976068	0.825127	1.68709	2.0363	2.26403	2.14521	2.13123	1.9694	1.95175		2.49748	1.44	1.51071	1.0982	1.69281	1.7863	0.957861
	11	1.97544	1.43739	1.63636	2.00165	4.03993	2.38916	1.93729	1.87829	1.87521	2.52727	1.28336	1.51078	1.39344	1.66667	1.99837	1.677	0.866883
	12	1.95704	2.76621	1.745	1.45203	1.62459	1.81967	1.70016	1.89689	1.66829	1.92797	1.6699	1.42997	1.51525	1.37742	1.62603	1.5396	0.756494
	13	1.35345	1.39932	1.66277	1.66832	1.23987	1.38835	1.68344	1.32206	1.41335	1.6873	1.57508	1.5525	0.952077	1.38042	1.67377	1.51387	0.742301
	14		1.55363	1.97778	1.6595	1.69231	1.81536	1.7055	1.2512	1.23089	1.448	1.39482	0.904685	1.22602	1.64715	1.8985	1.7053
	15			1.88401	1.62857	1.49261	1.58728	1.5297	1.61342	1.072	0.709779	1.04369	1.1732	0.872131	1.73884	1.56833
	16				1.83221	1.56414	1.29984	1.51923	1.5008	0.847352	0.725	0.735016	1.00805	0.940692	1.1072
	17					1.54854	1.43248	1.33868	1.04293	0.820031	0.639937	0.737942	0.686306	1.52273
8	1					2.60696	2.76367	1.36945	2.14362	1.90783	1.8791	1.31973	0.789916	1.8104					8																		8
	2				2.53065	0.913495	2.71228	2.34921	1.76215	1.28227	1.60102	2.43396	0.91806	0.845902	1.70984
0.00339067	3			1.75779	1.51658	1.38783	1.82669	1.91115	0.870307	1.47993	1.125	1.62542	1.38591	0.526742	1.69558	1.47883
	4		1.00173	1.0735	0.804836	1.0322	2.17295	2.20415	1.71619	1.52405	1.34841	1.15157	1.21217	0.939739	0.908046	1.18699	2.00499
	5	3.02993	1.34888	0.701695	1.875	1.62057	2.85329	1.77467	2.42	2.55	1.70707	1.34884	0.79316	1.20358	1.13776	1.36851	2.05473	1.26452
	6	3.4837	1.30976	1.12919	1.94825	2.05107	1.94137	2.07258	2.22277	2.36195	1.27825	1.11532	0.898527	1.76744	1.31107	1.82208	2.02467	1.30192
	7	3.13208	1.40962	1.36921	1.86207	2.26316	2.23089	1.8764	2.25418	1.77462	1.39268	1.02306	1.67839	1.7743	1.99835	1.90492	1.90969	1.09631
	8	1.75427	1.17406	2.10945	1.96405	1.92233	2.95146	2.04693	2.40924	2.12646	1.39934	1.1381	1.65943	1.87603	2.15973	1.84117	2.86395	1.17476
	9	1.79188	2.06468	2.08752	2.79321	1.89251	2.3536	2.41262	3.15033	2.40532		1.60438	1.82886	2.06441	1.83389	1.71289	1.76911	1.10824
	10	0.883051	0.94	1.83633	2.03105	2.21078	1.97907	1.96123	1.8704	2.00825		2.39496	1.59296	1.6589	1.17213	1.84039	1.77036	0.945161
	11	1.86644	1.50931	1.70695	1.98042	3.73984	2.33225	1.79839	1.87358	1.89389	2.51747	1.26765	1.54695	1.46417	1.74637	1.89567	1.7101	0.866774
	12	1.96422	2.46959	1.76744	1.45514	1.66775	1.71521	1.65595	1.90032	1.60064	1.93485	1.83197	1.53772	1.48734	1.4164	1.7289	1.5156	0.780998
	13	1.51024	1.42399	1.66387	1.74836	1.30968	1.57235	1.69839	1.22329	1.42155	1.65008	1.6096	1.47536	0.947867	1.46965	1.71615	1.66667	0.723027
	14		1.60616	1.98132	1.74834	1.82951	1.85599	1.72097	1.11306	1.20625	1.59011	1.40545	0.872814	1.2256	1.5632	2.01983	1.73496
	15			1.81326	1.63682	1.53507	1.73496	1.61699	1.53418	1.13573	0.722222	1.06051	1.18035	0.73913	1.81054	1.90066
	16				1.78167	1.47154	1.35806	1.5504	1.45959	0.89185	0.705148	0.71517	0.961844	0.940789	1.165
	17					1.47326	1.42424	1.31654	1.04382	1.0463	0.628483	0.730284	0.696541	1.54952
9	1					2.65125	2.51171	1.213	2.05376	1.93783	1.92334	1.37394	0.919598	1.89535					9																		9
	2				2.49027	0.862745	2.55655	2.23835	1.87368	1.31952	1.64544	2.41468	1.02829	0.998358	1.73203
0.00404611	3			1.61979	1.46422	1.27592	1.70945	1.90106	0.840678	1.59464	1.18242	1.62729	1.27723	0.654221	1.69055	1.40872
	4		0.886207	0.974271	0.856401	1.09262	2.12676	2.34261	1.797	1.50165	1.42786	1.1157	1.17987	0.877419	0.846527	1.15273	1.94728
	5	2.87034	1.25129	0.646465	1.90925	1.58333	2.90411	1.86446	2.44959	2.5539	1.81788	1.40165	0.842881	1.28734	0.990323	1.36	1.88006	1.29822
	6	3.11344	1.22689	1.15359	2.01836	2.0598	1.88474	1.97738	2.17781	2.48398	1.3505	1.14524	0.832248	1.80731	1.25932	1.57853	1.9789	1.38548
	7	2.91065	1.45258	1.41157	1.90296	2.29333	2.22727	1.96955	2.37686	1.77667	1.50083	1.01318	1.78571	1.81506	1.87276	1.75728	1.87702	1.25399
	8	1.57804	1.38935	2.11647	1.82459	1.86016	2.88188	2.03055	2.32903	2.18992	1.44152	1.28904	1.92654	2	2.02156	1.76423	2.88514	1.27751
	9	1.72559	1.96833	1.95895	2.78084	1.79545	2.45161	2.39583	3.03566	2.26797		1.7438	1.8985	2.05629	1.79538	1.64344	1.71314	1.14467
	10	0.974403	0.962901	1.75566	1.87013	2.15961	2.05314	2.05751	1.83119	1.88293		2.70149	1.57398	1.54902	1.29725	1.65127	1.70465	1.05705
	11	1.93426	1.45876	1.63607	1.94625	3.8127	2.29516	1.90291	1.82154	1.8064	2.67594	1.41234	1.54472	1.44212	1.76282	1.98086	1.69404	0.849117
	12	1.91652	2.79732	1.9	1.42097	1.71336	1.73151	1.76244	1.91469	1.60952	2.03865	1.74003	1.49679	1.58842	1.42767	1.7088	1.51691	0.760766
	13	1.36594	1.4094	1.59302	1.71197	1.3748	1.60032	1.82212	1.3811	1.59494	1.78583	1.736	1.60979	1.02504	1.48661	1.66453	1.51129	0.712681
	14		1.57823	2.05603	1.67974	1.82708	2.01131	1.6544	1.34434	1.36223	1.68504	1.50475	0.946541	1.27943	1.70813	2.03624	1.71824
	15			1.98438	1.61944	1.58632	1.75402	1.65183	1.59815	1.20955	0.782875	1.10748	1.25199	0.785137	1.72951	1.70443
	16				1.79373	1.58871	1.3125	1.58962	1.64852	0.894817	0.705069	0.754601	1.04897	1	1.18303
	17					1.63217	1.66348	1.45086	1.20674	0.989329	0.609831	0.740625	0.662037	1.71674
10	1					2.68157	2.57554	1.32065	2.02342	1.92908	1.92933	1.45862	0.922819	1.92399					10																		10
	2				2.72114	0.985816	2.62567	2.1982	1.82118	1.30532	1.56604	2.6524	0.938127	0.879139	1.82558
0.53713	3			1.56743	1.61579	1.45965	1.79682	1.88183	0.77403	1.51	1.06919	1.59766	1.34328	0.608911	1.74384	1.55447
	4		1.16431	1.05739	0.92	1.20138	2.19123	2.08405	1.64345	1.45861	1.38103	1.08306	1.17081	0.985318	0.910277	1.22977	2.15868
	5	2.85205	1.28325	0.664407	1.92215	1.58673	2.99142	1.83085	2.49338	2.51092	1.78752	1.45	0.839607	1.30115	1.09935	1.38625	1.92244	1.26961
	6	3.21552	1.37688	1.17333	1.91625	2.06902	1.89621	2.02589	2.26777	2.37186	1.2963	1.14333	0.857835	1.78311	1.3122	1.75204	2.01153	1.32315
	7	3.00171	1.40199	1.30449	1.84437	2.24374	2.22682	1.97245	2.2907	1.72454	1.44966	1.0363	1.7124	1.7734	1.95688	1.81967	1.95567	1.21314
	8	1.689	1.22333	1.99176	1.75372	1.94545	3.03795	2.07246	2.36156	2.08878	1.43854	1.29851	1.80399	1.80624	1.98003	1.90594	2.88103	1.22917
	9	1.64274	1.96656	2.00165	2.66121	1.73279	2.40033	2.36705	3.13793	2.31188		1.74247	1.83361	2.17715	1.75413	1.81518	1.65696	1.10841
	10	0.803419	0.872269	1.60621	1.9918	2.15824	2.14286	2.09609	1.9724	1.94702		2.47351	1.69028	1.61741	1.17208	1.81818	1.61003	0.983897
	11	1.91176	1.39219	1.62852	2.00666	3.95207	2.42717	1.94253	1.85809	1.94346	2.65033	1.24553	1.5719	1.42557	1.72442	1.94608	1.62258	0.856913
	12	1.80993	2.56122	1.74667	1.45724	1.56672	1.84653	1.76471	2.05032	1.63636	2.02117	1.67264	1.39871	1.65105	1.47749	1.64943	1.37903	0.805511
	13	1.31293	1.40816	1.48061	1.63636	1.30782	1.53409	1.91162	1.25796	1.30941	1.68395	1.5618	1.70275	1.02396	1.50242	1.68627	1.47049	0.710145
	14		1.5234	1.78485	1.62542	1.81561	1.92282	1.73821	1.26856	1.18425	1.52404	1.37179	0.929147	1.20679	1.60772	1.84565	1.59967
	15			1.84859	1.53245	1.49917	1.65082	1.54708	1.56101	1.1303	0.727414	1.0256	1.23165	0.76129	1.78033	1.70199
	16				1.77852	1.37274	1.26179	1.51942	1.53834	0.85625	0.654687	0.714286	0.939103	0.896382	1.04153
	17					1.52124	1.53473	1.35453	1.06761	0.996855	0.552795	0.612179	0.575277	1.4439

## Sheet: CV
MeanVelocity
Signals of insufficient quality were excluded from the property maps. Signals could be rejected based on noise low amplitude, large artefact or ventricluar farfields that could not be substracted.
		1	2	3	4	5	6	7	8	9	10	11	12	13	14	15	16	17
1	1					0.700544	0.705794	0.670453	0.653468	0.590421	0.600227	0.594709	0.620592	0.658897					1																		1
	2				0.747348	0.719527	0.714826	0.68381	0.625039	0.62519	0.67828	0.747885	0.664052	0.672766	0.589592
0.00342004	3			0.789445	0.777811	0.740594	0.711311	0.684278	0.650656	0.692709	0.726702	0.738596	0.722111	0.718258	0.655715	0.591877
	4		0.784505	0.766034	0.703516	0.661246	0.681218	0.708108	0.660408	0.751746	0.785407	0.831686	0.797092	0.780793	0.731549	0.683902	0.671082
	5	0.860022	0.85972	0.801582	0.717085	0.662766	0.691061	0.669114	0.670171	0.667579	0.722197	0.78679	0.807601	0.772476	0.744839	0.736828	0.744375	0.651663
	6	0.92203	0.875	0.823094	0.785931	0.739709	0.698544	0.720764	0.672136	0.705519	0.671424	0.701009	0.711861	0.746766	0.718957	0.746817	0.719074	0.645325
	7	0.847499	0.881278	0.884999	0.873028	0.832382	0.870365	0.859017	0.785403	0.723886	0.692761	0.693786	0.727075	0.69996	0.734143	0.738456	0.765051	0.675098
	8	0.817271	0.820514	0.877268	0.880943	0.897419	0.974831	0.894758	0.792263	0.716223	0.730533	0.747524	0.753517	0.721287	0.797348	0.799067	0.687398	0.705086
	9	0.852203	0.8253	0.911051	0.883746	0.935565	0.85498	0.849558	0.814686	0.690908	0.7526	0.767921	0.739101	0.717739	0.765141	0.79962	0.756548	0.675356
	10	0.76905	0.770767	0.842936	0.839693	0.860227	0.812411	0.817873	0.730573	0.749267	0.747971	0.758205	0.720478	0.730744	0.729459	0.750524	0.741855	0.724067
	11	0.789361	0.760432	0.797999	0.834418	0.81904	0.790434	0.85372	0.808049	0.813291	0.799379	0.790997	0.774202	0.750026	0.769855	0.784685	0.786222	0.731238
	12	0.801605	0.744054	0.800731	0.791182	0.779361	0.798199	0.852369	0.785304	0.793078	0.824381	0.829589	0.806562	0.721318	0.768394	0.772652	0.825143	0.729233
	13	0.738512	0.766835	0.81008	0.818704	0.761257	0.806029	0.8608	0.826988	0.803321	0.803869	0.86972	0.762687	0.666357	0.722767	0.797767	0.780971	0.777383
	14		0.71238	0.739257	0.710393	0.70121	0.766466	0.767254	0.824978	0.810678	0.875214	0.873101	0.753233	0.685926	0.69058	0.743473	0.772517
	15			0.664383	0.663651	0.676895	0.713714	0.726596	0.859913	0.889986	0.858744	0.767443	0.751238	0.671373	0.636309	0.693032
	16				0.682571	0.680243	0.713678	0.738314	0.822955	0.887478	0.823164	0.718243	0.724286	0.61313	0.629216
	17					0.65174	0.68694	0.738994	0.814594	0.877433	0.792314	0.721644	0.657375	0.597741
2	1					0.781792	0.750377	0.760781	0.653894	0.586549	0.608215	0.552255	0.567665	0.608956					2																		2
	2				0.743562	0.754827	0.748016	0.716992	0.626728	0.66185	0.660936	0.675013	0.624021	0.665482	0.616182
0.00356232	3			0.765452	0.764613	0.749842	0.7511	0.723883	0.660285	0.668092	0.663482	0.735122	0.726219	0.694496	0.682933	0.595819
	4		0.824326	0.759356	0.687174	0.688528	0.683866	0.639672	0.671055	0.688485	0.758655	0.805773	0.850433	0.782866	0.727447	0.693982	0.674984
	5	0.915561	0.878578	0.823149	0.71233	0.656696	0.658219	0.680861	0.67226	0.702174	0.691415	0.79143	0.741365	0.769594	0.702301	0.712078	0.701514	0.666047
	6	0.977712	0.963939	0.915336	0.805981	0.721251	0.726303	0.721729	0.693868	0.708005	0.709673	0.718454	0.714766	0.701156	0.671188	0.722247	0.755278	0.675898
	7	0.92089	0.91222	0.910981	0.895693	0.809568	0.878021	0.833812	0.79137	0.720687	0.742986	0.705248	0.742067	0.672392	0.659523	0.72319	0.754958	0.691817
	8	0.831335	0.851116	0.868096	0.904363	0.924227	0.926807	0.920632	0.882733	0.760384	0.722636	0.794002	0.773279	0.67545	0.755215	0.779587	0.63027	0.737896
	9	0.827879	0.859403	0.918542	0.903959	0.870719	0.875472	0.890257	0.845964	0.813127	0.828136	0.740937	0.73674	0.755724	0.822094	0.781498	0.813222	0.703125
	10	0.764508	0.808718	0.869512	0.823166	0.789246	0.839582	0.840112	0.810394	0.833316	0.848461	0.76424	0.770498	0.708022	0.766172	0.757765	0.768838	0.719246
	11	0.740963	0.771981	0.756403	0.73625	0.748079	0.80279	0.864042	0.829156	0.823193	0.911135	0.803042	0.770439	0.743125	0.817874	0.818358	0.810546	0.757833
	12	0.690527	0.700601	0.730568	0.740761	0.747416	0.779781	0.801137	0.815058	0.811182	0.890265	0.852854	0.729789	0.681563	0.79709	0.8196	0.833522	0.799345
	13	0.67502	0.69054	0.724447	0.747519	0.7192	0.746647	0.810048	0.861759	0.858786	0.877415	0.850004	0.761168	0.729245	0.781462	0.808317	0.891686	0.805933
	14		0.652122	0.706574	0.681833	0.735331	0.725876	0.765902	0.816369	0.855838	0.866358	0.821592	0.731462	0.695091	0.701558	0.776762	0.801496
	15			0.642672	0.665289	0.67203	0.721133	0.733654	0.8454	0.903643	0.838423	0.808924	0.754111	0.651416	0.632574	0.665325
	16				0.663901	0.678994	0.719507	0.765253	0.896208	0.855735	0.772274	0.75146	0.667527	0.57566	0.571506
	17					0.687693	0.732537	0.784822	0.789908	0.815029	0.712725	0.702535	0.64497	0.582066
3	1					0.698368	0.702793	0.682584	0.639222	0.568326	0.592518	0.595541	0.599982	0.587694					3																		3
	2				0.785593	0.75563	0.767315	0.739908	0.690263	0.685019	0.687463	0.696368	0.627577	0.645294	0.623009
0.00373946	3			0.779122	0.774616	0.751972	0.819672	0.755976	0.70399	0.766798	0.759547	0.731241	0.70377	0.690339	0.672628	0.594403
	4		0.810646	0.750188	0.686465	0.747907	0.691193	0.670093	0.722427	0.734789	0.802757	0.793959	0.796967	0.795478	0.709639	0.690326	0.677604
	5	0.892762	0.824198	0.787109	0.70656	0.696015	0.705598	0.658592	0.662805	0.702386	0.755994	0.792787	0.793407	0.829545	0.730106	0.728355	0.747148	0.61252
	6	0.934453	0.873089	0.831433	0.768187	0.725838	0.709162	0.708616	0.720659	0.698023	0.727414	0.725997	0.715523	0.756317	0.768957	0.757867	0.781045	0.62895
	7	0.862962	0.846747	0.847148	0.794468	0.722529	0.830335	0.763943	0.762011	0.72002	0.732823	0.73355	0.769809	0.671553	0.736052	0.773951	0.73647	0.624708
	8	0.819948	0.814475	0.863879	0.807213	0.823537	0.881281	0.806468	0.793375	0.733835	0.710656	0.757233	0.725959	0.650122	0.775683	0.783347	0.666063	0.648305
	9	0.862358	0.845294	0.863382	0.863699	0.832034	0.809737	0.803272	0.855703	0.775878	0.755399	0.734692	0.733656	0.666176	0.747389	0.740068	0.723238	0.621835
	10	0.812159	0.833304	0.849463	0.859764	0.805468	0.780112	0.82331	0.81496	0.794017	0.771088	0.771257	0.6983	0.685247	0.693639	0.705162	0.685655	0.637508
	11	0.748037	0.730054	0.79069	0.79157	0.798596	0.752351	0.766493	0.752571	0.770186	0.778176	0.734351	0.715311	0.694835	0.750674	0.812253	0.734451	0.683754
	12	0.747615	0.729965	0.751712	0.765989	0.730693	0.701222	0.729164	0.748955	0.763555	0.800234	0.777961	0.721048	0.7194	0.750591	0.835377	0.826853	0.718018
	13	0.721664	0.695224	0.761738	0.722201	0.728312	0.788753	0.793696	0.744489	0.782537	0.785855	0.766533	0.733649	0.684558	0.718129	0.783918	0.781978	0.755241
	14		0.656304	0.685505	0.714187	0.713707	0.768307	0.774394	0.727936	0.770557	0.834465	0.755219	0.660542	0.647562	0.697586	0.740913	0.75617
	15			0.634473	0.634193	0.664623	0.721518	0.760639	0.751565	0.759741	0.814861	0.77817	0.708511	0.631471	0.665479	0.670314
	16				0.65441	0.674634	0.706217	0.756429	0.757391	0.785799	0.802052	0.721708	0.660803	0.615589	0.57992
	17					0.7181	0.729818	0.721266	0.706307	0.781206	0.771726	0.715057	0.620357	0.574244
4	1					0.74253	0.726877	0.693184	0.654091	0.632185	0.631006	0.63399	0.599075	0.618681					4																		4
	2				0.790679	0.835576	0.863721	0.766704	0.700501	0.74551	0.72102	0.750619	0.666724	0.678992	0.632879
0.00333065	3			0.793087	0.74807	0.872906	0.816189	0.706942	0.69812	0.757443	0.754852	0.768214	0.725752	0.72328	0.701443	0.623725
	4		0.841412	0.769744	0.715221	0.690847	0.740434	0.671027	0.676791	0.742338	0.784267	0.87545	0.853763	0.790463	0.761252	0.73763	0.676517
	5	0.903187	0.88839	0.797126	0.684827	0.68154	0.719484	0.689989	0.726011	0.722038	0.754796	0.80456	0.834097	0.837382	0.784663	0.788634	0.751692	0.710226
	6	0.952248	0.867656	0.766335	0.71386	0.718573	0.707922	0.763333	0.700587	0.709901	0.703561	0.749168	0.736705	0.766773	0.762205	0.824343	0.757871	0.693585
	7	0.889757	0.829721	0.869174	0.833171	0.818181	0.846222	0.83521	0.840868	0.763679	0.696317	0.735826	0.774708	0.686282	0.714835	0.785438	0.762074	0.693976
	8	0.816876	0.846501	0.856768	0.899322	0.887771	0.922683	0.854177	0.830056	0.751786	0.764913	0.769285	0.715263	0.689233	0.744429	0.766888	0.566788	0.698638
	9	0.830312	0.86177	0.877427	0.885141	0.85799	0.881325	0.812672	0.82237	0.754933	0.739553	0.703856	0.706889	0.71317	0.761554	0.760826	0.733001	0.650235
	10	0.792785	0.836684	0.841974	0.844522	0.899177	0.784706	0.814984	0.788272	0.822031	0.753449	0.724573	0.713899	0.7476	0.730898	0.771237	0.736458	0.663717
	11	0.717861	0.748254	0.802196	0.817688	0.806356	0.74453	0.787863	0.798956	0.83154	0.793398	0.733675	0.723	0.706884	0.720428	0.724841	0.770529	0.752751
	12	0.715201	0.71602	0.74645	0.744571	0.772255	0.746656	0.795623	0.852818	0.891365	0.860625	0.737176	0.754954	0.722802	0.684631	0.767021	0.854122	0.804175
	13	0.724787	0.676277	0.756315	0.738473	0.78997	0.819727	0.774101	0.814409	0.850648	0.895472	0.769015	0.69795	0.681167	0.721374	0.804981	0.886701	0.841677
	14		0.673178	0.68793	0.675253	0.763308	0.768791	0.796986	0.862409	0.890221	0.886944	0.824944	0.710467	0.702796	0.718201	0.751172	0.818798
	15			0.650951	0.66862	0.679559	0.741458	0.779552	0.871051	0.902269	0.872266	0.848117	0.743115	0.677687	0.702775	0.667654
	16				0.677954	0.74652	0.792367	0.810844	0.894724	0.856536	0.885432	0.782633	0.653927	0.624141	0.568043
	17					0.777122	0.809331	0.852221	0.836088	0.815807	0.793337	0.754681	0.637861	0.587273
5	1					0.774197	0.718959	0.625048	0.577565	0.607011	0.638933	0.583258	0.592871	0.615449					5																		5
	2				0.710169	0.733473	0.72488	0.705179	0.659282	0.653909	0.71479	0.684786	0.663457	0.67432	0.626149
	3			0.739045	0.721995	0.735086	0.742697	0.682386	0.649218	0.707087	0.695943	0.703066	0.710364	0.720112	0.687409	0.597241
	4		0.783325	0.745745	0.697719	0.656415	0.656639	0.655966	0.668863	0.706508	0.774629	0.795063	0.727071	0.730189	0.719106	0.707379	0.677031
	5	0.950075	0.870435	0.800366	0.707709	0.655246	0.681561	0.631016	0.697012	0.718017	0.731573	0.736089	0.704641	0.750758	0.73808	0.793969	0.707568	0.666688
	6	0.957905	0.916008	0.850342	0.729057	0.675053	0.693262	0.706279	0.668255	0.706136	0.679976	0.715307	0.676677	0.738669	0.739332	0.764184	0.73622	0.635645
	7	0.846327	0.898396	0.883639	0.823599	0.795122	0.824183	0.835053	0.815107	0.691641	0.67932	0.685916	0.764163	0.668298	0.695675	0.72522	0.77506	0.66244
	8	0.759847	0.804333	0.810598	0.847408	0.883716	0.946026	0.942635	0.880277	0.769144	0.725468	0.747883	0.766572	0.661875	0.694526	0.782791	0.67215	0.679169
	9	0.862833	0.821225	0.836027	0.820968	0.835213	0.862953	0.888677	0.829754	0.816286	0.752667	0.761989	0.722923	0.675791	0.745079	0.768936	0.768723	0.680295
	10	0.778499	0.817421	0.799526	0.83229	0.746378	0.795273	0.80588	0.870836	0.784633	0.761036	0.794815	0.692026	0.694557	0.734084	0.738099	0.725298	0.666923
	11	0.761003	0.78561	0.759185	0.745073	0.768026	0.729112	0.790168	0.846283	0.789615	0.815665	0.761896	0.758345	0.710326	0.777714	0.813603	0.793974	0.712321
	12	0.752011	0.700489	0.739568	0.71671	0.713869	0.709177	0.752126	0.821983	0.862063	0.806507	0.831277	0.781803	0.777698	0.758178	0.781066	0.779983	0.733531
	13	0.749973	0.719997	0.764877	0.730493	0.702744	0.759046	0.785475	0.819403	0.843966	0.873033	0.861711	0.802243	0.741881	0.74	0.832693	0.782081	0.756952
	14		0.67014	0.69647	0.72222	0.742638	0.749151	0.761565	0.824825	0.811048	0.867791	0.886856	0.803183	0.712184	0.716482	0.759305	0.783658
	15			0.659267	0.662357	0.683411	0.741927	0.769848	0.797929	0.847991	0.879488	0.875366	0.816419	0.674146	0.674256	0.709059
	16				0.670662	0.703187	0.722724	0.789074	0.847537	0.8812	0.853944	0.806231	0.73327	0.639099	0.567438
	17					0.690367	0.712955	0.660439	0.766774	0.818113	0.815601	0.766963	0.643712	0.596496
6	1					0.73226	0.695374	0.649446	0.632953	0.597806	0.619337	0.619456	0.609785	0.656914					6																		6
	2				0.786178	0.785174	0.7366	0.698546	0.661828	0.695459	0.707168	0.66143	0.644058	0.656352	0.649844
0.00328783	3			0.775905	0.801973	0.778185	0.744721	0.711542	0.670462	0.732802	0.70604	0.686742	0.686724	0.668131	0.673146	0.630451
	4		0.81124	0.726337	0.676001	0.642075	0.705296	0.671607	0.655859	0.705412	0.802978	0.759411	0.746864	0.709021	0.75508	0.715134	0.700444
	5	0.890581	0.826601	0.755615	0.706478	0.647056	0.635926	0.634811	0.672641	0.6919	0.757599	0.803161	0.7617	0.731234	0.750188	0.711527	0.708055	0.645933
	6	0.947413	0.898755	0.834718	0.70694	0.662691	0.725774	0.701421	0.712454	0.765821	0.770399	0.763871	0.720578	0.730697	0.736915	0.724239	0.746364	0.668045
	7	0.889632	0.867421	0.812325	0.783363	0.782075	0.831394	0.786227	0.814497	0.742526	0.754855	0.748099	0.761011	0.675554	0.71179	0.755917	0.80571	0.700962
	8	0.827828	0.852218	0.84968	0.827654	0.912321	0.898265	0.856726	0.855012	0.789977	0.745127	0.748969	0.776927	0.681679	0.744827	0.757918	0.718365	0.703235
	9	0.867776	0.874547	0.908894	0.916992	0.886438	0.873122	0.861084	0.846232	0.774564	0.774653	0.802071	0.707807	0.680401	0.756942	0.748707	0.770693	0.715318
	10	0.798478	0.866249	0.853443	0.8603	0.850946	0.837562	0.826482	0.788289	0.76748	0.776771	0.736765	0.68478	0.686626	0.700483	0.77256	0.757179	0.693115
	11	0.774176	0.727531	0.817483	0.812169	0.789326	0.783488	0.750086	0.738436	0.706885	0.729884	0.708353	0.713012	0.71115	0.748543	0.801352	0.808178	0.758812
	12	0.705294	0.7178	0.759435	0.774939	0.771766	0.779087	0.721987	0.762475	0.745992	0.807597	0.798336	0.765838	0.721279	0.780935	0.811456	0.846958	0.869225
	13	0.742878	0.681899	0.730287	0.723748	0.73944	0.764041	0.718381	0.759865	0.801545	0.847252	0.853308	0.763474	0.71898	0.792925	0.817286	0.838781	0.879168
	14		0.615812	0.663789	0.647695	0.715966	0.710791	0.750853	0.806635	0.844068	0.908587	0.844785	0.77097	0.686882	0.710773	0.781407	0.853518
	15			0.600093	0.609247	0.656674	0.744655	0.765472	0.846983	0.923536	0.937495	0.849141	0.759373	0.686661	0.68402	0.690818
	16				0.659198	0.703849	0.776321	0.769763	0.825925	0.900948	0.850418	0.779322	0.663971	0.625967	0.607514
	17					0.711332	0.69886	0.740527	0.811193	0.849136	0.811654	0.727502	0.661169	0.593944
7	1					0.775418	0.734726	0.679429	0.626769	0.606974	0.610221	0.608364	0.62816	0.63628					7																		7
	2				0.716818	0.751565	0.752414	0.721765	0.720681	0.677636	0.685219	0.702481	0.680503	0.70733	0.627556
	3			0.747197	0.736295	0.744953	0.734524	0.711599	0.677173	0.739274	0.757844	0.747458	0.739765	0.688487	0.662442	0.568635
	4		0.806262	0.787553	0.71903	0.692834	0.715126	0.719933	0.718834	0.748784	0.77204	0.830168	0.81974	0.736053	0.6711	0.613179	0.639445
	5	0.948318	0.893623	0.827708	0.75028	0.674463	0.728214	0.683464	0.695386	0.72805	0.767261	0.752291	0.736647	0.739299	0.663635	0.681073	0.684575	0.653304
	6	0.979121	0.954986	0.848838	0.741302	0.691594	0.770604	0.729468	0.704305	0.687137	0.705087	0.709592	0.676018	0.728484	0.69353	0.67669	0.671101	0.626652
	7	0.960772	0.969621	0.869066	0.807842	0.796551	0.825959	0.836914	0.771716	0.744284	0.710509	0.719547	0.736046	0.672219	0.692529	0.720619	0.753035	0.702471
	8	0.901092	0.988878	0.917725	0.883408	0.912638	0.932378	0.855776	0.808466	0.784374	0.742097	0.726568	0.732765	0.664552	0.704977	0.782597	0.652202	0.712558
	9	0.890249	0.90064	0.882181	0.91726	0.883341	0.804824	0.817396	0.819294	0.73973	0.690242	0.734631	0.744797	0.695875	0.710023	0.688215	0.725636	0.684207
	10	0.811948	0.840449	0.857183	0.8198	0.77276	0.745659	0.791922	0.785065	0.804751	0.746341	0.722545	0.734646	0.696527	0.686392	0.68999	0.73047	0.713697
	11	0.758118	0.758309	0.842621	0.819477	0.780876	0.781882	0.780995	0.834569	0.7585	0.801867	0.784455	0.732869	0.669441	0.684242	0.79099	0.795963	0.777866
	12	0.68137	0.706911	0.74619	0.790603	0.73225	0.764274	0.780865	0.856808	0.852458	0.796755	0.787601	0.734327	0.699178	0.724293	0.810415	0.825182	0.796133
	13	0.658797	0.682086	0.705192	0.731112	0.726019	0.806207	0.852699	0.856553	0.807991	0.838887	0.810152	0.76426	0.730259	0.744826	0.786383	0.815818	0.824645
	14		0.628085	0.711138	0.705191	0.730104	0.813804	0.839411	0.793719	0.800556	0.861205	0.825033	0.774357	0.73805	0.695676	0.775317	0.796082
	15			0.670818	0.671134	0.674571	0.756102	0.759377	0.790958	0.844527	0.801689	0.812175	0.734368	0.691563	0.654252	0.691144
	16				0.660166	0.706425	0.743683	0.74445	0.854022	0.857511	0.77949	0.734784	0.715052	0.663264	0.600809
	17					0.704437	0.738266	0.78585	0.839232	0.846469	0.773477	0.762784	0.708307	0.623659
8	1					0.75213	0.711714	0.677171	0.673397	0.649002	0.64868	0.638932	0.674303	0.699053					8																		8
	2				0.801273	0.742104	0.714522	0.70185	0.67644	0.76383	0.723607	0.759261	0.73519	0.683073	0.632262
0.00339067	3			0.804185	0.79114	0.794836	0.720675	0.691313	0.695411	0.768384	0.753237	0.750892	0.749864	0.713988	0.701175	0.641694
	4		0.780581	0.755346	0.707722	0.695856	0.696903	0.706148	0.705486	0.701772	0.759807	0.797161	0.793108	0.762079	0.732483	0.722148	0.646857
	5	0.952836	0.908359	0.8337	0.707365	0.678867	0.690331	0.647095	0.691836	0.689202	0.708635	0.738341	0.773093	0.797505	0.685572	0.71844	0.741626	0.6695
	6	0.95325	0.942337	0.923032	0.760522	0.686468	0.732527	0.730354	0.690213	0.655644	0.652202	0.694585	0.714914	0.743678	0.710542	0.728706	0.696286	0.635492
	7	0.891089	0.894307	0.909233	0.807925	0.747957	0.806325	0.815515	0.809159	0.651735	0.683152	0.698625	0.778405	0.691799	0.701145	0.685373	0.714045	0.652691
	8	0.847621	0.877645	0.877158	0.888801	0.875772	0.942277	0.877122	0.860201	0.719591	0.728919	0.743808	0.764395	0.671702	0.722234	0.693675	0.606643	0.705717
	9	0.819825	0.863585	0.912394	0.880602	0.817582	0.901391	0.885239	0.856283	0.761442	0.748716	0.74688	0.745022	0.689262	0.725582	0.702279	0.780858	0.68479
	10	0.788	0.757579	0.812669	0.8214	0.791299	0.776581	0.810531	0.796666	0.816718	0.758562	0.741195	0.724824	0.709407	0.684856	0.743855	0.766783	0.687137
	11	0.727014	0.715297	0.741779	0.757882	0.752322	0.804529	0.808844	0.79483	0.814263	0.796919	0.787829	0.734961	0.725348	0.75534	0.781533	0.78565	0.722228
	12	0.694731	0.720503	0.754036	0.734565	0.72481	0.779599	0.828614	0.826866	0.840969	0.81388	0.82675	0.774322	0.729523	0.747688	0.803491	0.806463	0.765519
	13	0.729608	0.711984	0.746949	0.709919	0.705565	0.777435	0.802554	0.827225	0.857066	0.877075	0.837526	0.783872	0.678862	0.693047	0.741952	0.764968	0.774874
	14		0.650054	0.697368	0.705643	0.692222	0.692212	0.742322	0.828452	0.843746	0.853384	0.826487	0.720721	0.66241	0.643388	0.70265	0.734918
	15			0.658985	0.647773	0.663863	0.728921	0.733422	0.810019	0.858211	0.813497	0.823039	0.755445	0.667973	0.655636	0.60191
	16				0.687909	0.692731	0.770187	0.76603	0.780902	0.831469	0.827988	0.810562	0.707196	0.634411	0.589698
	17					0.759436	0.772368	0.783788	0.770223	0.799925	0.758325	0.767805	0.649185	0.589768
9	1					0.798694	0.827271	0.665549	0.637906	0.60648	0.627571	0.595343	0.572538	0.619584					9																		9
	2				0.770319	0.757335	0.82621	0.692028	0.641001	0.663891	0.668749	0.67991	0.657904	0.698773	0.599953
0.00404611	3			0.782998	0.789159	0.793875	0.785204	0.672744	0.670697	0.678952	0.668634	0.696789	0.702403	0.70662	0.647477	0.61824
	4		0.779074	0.742583	0.695485	0.731574	0.741633	0.654437	0.682852	0.685901	0.72726	0.763507	0.792557	0.740528	0.703748	0.67949	0.675307
	5	0.963	0.894754	0.782719	0.694254	0.689536	0.696289	0.676295	0.657642	0.690144	0.668672	0.721241	0.753407	0.723685	0.691586	0.715725	0.694044	0.673316
	6	0.9877	0.87688	0.82035	0.724378	0.708696	0.722835	0.751303	0.730388	0.705396	0.689182	0.707832	0.710931	0.765645	0.718053	0.769874	0.74359	0.647044
	7	0.890853	0.894291	0.833624	0.75252	0.800177	0.77347	0.778114	0.780163	0.731814	0.738227	0.681163	0.706571	0.669541	0.710217	0.76835	0.803836	0.688639
	8	0.801292	0.845844	0.810356	0.816142	0.777519	0.87155	0.840714	0.809749	0.742076	0.745837	0.698236	0.695873	0.671508	0.7118	0.737316	0.678349	0.753055
	9	0.790745	0.846527	0.836747	0.808026	0.832809	0.795311	0.805214	0.791612	0.720814	0.691948	0.707873	0.689203	0.70139	0.711001	0.721552	0.766837	0.700774
	10	0.778746	0.759095	0.764534	0.801564	0.770301	0.762371	0.81324	0.766067	0.769654	0.706644	0.721166	0.717602	0.720829	0.679343	0.759104	0.81479	0.729179
	11	0.74455	0.735276	0.744045	0.708585	0.734743	0.753987	0.815673	0.769702	0.787942	0.805383	0.74308	0.744674	0.700139	0.756142	0.750713	0.810539	0.754518
	12	0.72848	0.709465	0.733108	0.690167	0.759363	0.753995	0.807862	0.790762	0.743225	0.821844	0.791835	0.700317	0.692497	0.752791	0.812268	0.794497	0.771228
	13	0.690527	0.680193	0.731435	0.709342	0.733385	0.773477	0.801061	0.781445	0.799037	0.847572	0.83291	0.74634	0.729913	0.736424	0.812479	0.844765	0.780086
	14		0.665791	0.663189	0.660735	0.730897	0.776799	0.765922	0.781637	0.77958	0.816304	0.81033	0.747391	0.744969	0.724105	0.798487	0.889306
	15			0.61647	0.638137	0.64753	0.658225	0.705106	0.814013	0.808622	0.820688	0.75527	0.744885	0.729021	0.711558	0.736409
	16				0.605558	0.650668	0.636248	0.701466	0.820081	0.772412	0.802752	0.756613	0.664489	0.649101	0.645194
	17					0.658035	0.650786	0.699454	0.778043	0.713745	0.702726	0.730214	0.625904	0.590371
10	1					0.784065	0.814383	0.680965	0.67381	0.638872	0.638206	0.580869	0.591393	0.619087					10																		10
	2				0.769971	0.768416	0.841984	0.746407	0.683802	0.700322	0.691823	0.701286	0.676733	0.656375	0.641848
0.0708535	3			0.799968	0.777582	0.759291	0.816138	0.774813	0.70009	0.804933	0.732029	0.802696	0.76976	0.725633	0.673702	0.640802
	4		0.770036	0.730606	0.715295	0.680452	0.712008	0.706448	0.708167	0.724203	0.807674	0.830745	0.806144	0.764322	0.726951	0.652647	0.710966
	5	0.891548	0.8535	0.767831	0.743171	0.683312	0.711309	0.707788	0.649925	0.691299	0.73367	0.788848	0.7888	0.753507	0.73526	0.703792	0.737399	0.642099
	6	0.985302	0.918091	0.799654	0.748165	0.704591	0.68866	0.701466	0.681338	0.696687	0.684314	0.738153	0.718422	0.738912	0.729197	0.750248	0.761649	0.64566
	7	0.843948	0.863141	0.827943	0.803655	0.843943	0.841869	0.852479	0.771435	0.70083	0.745369	0.694882	0.774145	0.690613	0.749862	0.75599	0.770856	0.697824
	8	0.844123	0.913302	0.897588	0.929745	0.885573	0.915628	0.854456	0.829841	0.735606	0.691368	0.722092	0.747659	0.690771	0.751375	0.750836	0.605401	0.743679
	9	0.85413	0.883984	0.899218	0.948146	0.898492	0.830915	0.796598	0.74678	0.722846	0.698802	0.754755	0.68471	0.671185	0.697889	0.734527	0.762579	0.662618
	10	0.767208	0.781899	0.818702	0.826761	0.794143	0.77276	0.826994	0.74618	0.763673	0.721248	0.679991	0.677019	0.701097	0.70878	0.725477	0.782708	0.765853
	11	0.729015	0.781845	0.769393	0.852193	0.772597	0.761865	0.794367	0.78978	0.791227	0.78096	0.733022	0.705614	0.716045	0.752996	0.802086	0.830849	0.768205
	12	0.73483	0.744033	0.779283	0.805039	0.736082	0.739394	0.743847	0.820281	0.83481	0.856697	0.785491	0.741749	0.732855	0.751823	0.835499	0.821455	0.831524
	13	0.736936	0.768769	0.799088	0.8204	0.754103	0.768268	0.780478	0.816022	0.802997	0.836999	0.888887	0.774231	0.715969	0.774264	0.835121	0.787408	0.836855
	14		0.677887	0.777318	0.734757	0.745326	0.76529	0.784697	0.800779	0.825052	0.910588	0.83109	0.756115	0.719738	0.694097	0.780125	0.777959
	15			0.634026	0.649794	0.684829	0.710128	0.722778	0.797396	0.869976	0.876963	0.828808	0.772953	0.673987	0.679806	0.698352
	16				0.639846	0.724713	0.689935	0.748893	0.838962	0.799759	0.826611	0.743682	0.68099	0.621189	0.591859
	17					0.696903	0.682542	0.754298	0.791571	0.795716	0.781535	0.710482	0.660839	0.617073

## Sheet: Pref
Preferentiality
Signals of insufficient quality were excluded from the property maps. Signals could be rejected based on noise low amplitude, large artefact or ventricluar farfields that could not be substracted.
		1	2	3	4	5	6	7	8	9	10	11	12	13	14	15	16	17
1	1					2.3982	1.76452	1.27164	1.08963	1.16863	1.2222	1.02197	0.85822	2.5513					1																		1
	2				0.649614	2.45557	1.96984	1.30124	0.946152	0.9275	0.977657	0.477603	0.483114	0.0695639	2.70861
0.00342004	3			0.16759	2.53429	2.29519	1.74598	0.84454	0.905561	0.897252	0.741155	0.492021	0.319557	0.0894242	2.93669	2.74274
	4		1.33687	1.56084	1.68909	1.82536	1.52195	1.6341	1.49383	0.874494	0.472142	0.315664	0.129825	0.0904689	3.06247	2.98067	2.85403
	5	0.816836	1.05954	1.33927	1.26228	1.44081	1.5061	1.69664	1.93356	3.07769	0.10459	0.267908	0.293595	0.182968	0.0611872	0.035735	3.03327	3.0214
	6	0.877093	1.1024	1.11092	1.10458	1.02591	1.26363	1.66095	2.02974	2.4494	2.87522	1.06529	0.388184	0.27913	0.185953	0.117892	0.0824207	0.0855658
	7	1.0586	0.951919	0.923451	0.84762	0.771658	0.946439	1.41447	2.56354	2.56173	2.18566	2.35099	0.350523	0.348821	0.339698	0.234387	0.173007	0.0868451
	8	0.0565259	0.51823	0.731244	0.564628	0.487489	0.579171	0.661352	0.0175147	2.85186	2.48086	0.749435	0.625431	0.497081	0.498924	0.27532	0.0863812	0.077102
	9	2.80845	2.85672	2.70826	3.13197	0.254155	0.695426	0.826925	0.761533	0.859939	0.558656	0.625355	0.925994	0.753332	0.452286	0.269309	0.168196	0.0200922
	10	2.46813	2.6266	2.38621	2.47276	1.33049	0.733568	0.761482	0.846846	1.0361	0.278335	0.814576	1.11413	0.189845	0.186076	0.151047	0.161787	0.0622469
	11	2.305	2.28117	2.22233	2.34313	1.18444	0.443562	0.542082	0.590165	0.807174	1.02179	1.02995	1.38553	0.0569604	0.127046	0.198336	0.239779	0.247459
	12	2.15481	2.2433	2.31015	2.92315	0.373081	0.293208	0.353219	0.476497	0.790633	0.857875	0.685006	0.0817306	3.07246	0.0688602	0.18686	0.304784	0.28217
	13	2.29916	2.57443	2.62076	0.462051	0.384706	0.476895	0.406458	0.533563	0.847672	0.796967	0.65502	3.01929	3.09676	0.127213	0.18836	0.347867	0.40227
	14		2.42835	2.32122	1.50149	0.684233	0.524916	0.491737	0.563572	0.706767	1.23753	0.921991	3.08925	3.08956	0.277731	0.703564	0.547208
	15			2.22233	1.34836	0.845843	0.656212	0.620705	0.675626	0.951156	1.88167	1.55068	1.22978	0.909579	0.636941	0.754685
	16				1.25366	0.784084	0.713045	0.69827	1.16535	1.58903	1.73002	1.77254	1.39755	0.929095	0.713072
	17					0.968336	1.16811	1.17745	1.49813	1.63319	1.63046	1.7613	1.48783	0.812944
2	1					1.92577	1.40172	0.934204	0.912233	1.0092	1.03104	0.99126	0.77181	2.37429					2																		2
	2				2.61602	1.95894	1.38089	1.0787	0.872666	0.915489	0.957499	0.491153	0.22414	0.0494461	2.88737
0.00356232	3			2.89861	2.61115	1.90694	1.37366	0.99757	0.900707	0.930929	0.657141	0.335849	0.169938	0.0943363	3.09386	2.9372
	4		1.56189	1.77892	2.13988	1.477	1.44983	1.3454	1.28957	0.984063	0.386689	0.296436	0.0647116	0.0353594	3.11525	3.10826	2.9257
	5	0.894005	1.28945	1.30451	1.38545	1.15591	1.21123	1.56327	1.78667	2.15963	0.157274	0.289043	0.129916	0.0857513	0.0413358	0.0517325	3.04857	0.0169328
	6	0.860086	0.891105	0.94994	0.918246	0.941871	1.13574	1.68844	2.07735	2.28705	2.30811	2.52946	3.0313	0.0210548	0.0679634	0.109732	0.132825	0.134553
	7	0.898136	0.865495	0.83568	0.623754	0.643113	0.68106	1.73325	2.38602	2.5459	2.37078	2.21155	0.00754086	3.05786	0.0165181	0.149284	0.198711	0.209528
	8	2.89483	0.114387	0.146726	0.0408409	0.194986	0.297306	0.271564	2.84652	2.7452	2.86353	0.250782	0.434981	0.0920482	0.205642	0.305888	0.0410279	0.176876
	9	2.69137	2.68265	2.70492	2.77725	2.89777	0.333293	0.571818	0.825561	2.26037	0.456707	1.08677	0.656228	0.243515	0.289494	0.354688	0.277925	0.0885632
	10	2.59064	2.48055	2.46532	2.51359	2.94307	0.24068	0.76687	0.98157	0.868563	0.574623	1.50387	1.49132	0.361538	0.201019	0.249472	0.161037	0.0581322
	11	2.47912	2.2972	2.30704	2.36666	2.90514	0.307537	0.630798	0.740616	0.8735	1.1876	1.374	1.42274	0.329407	0.175933	0.243519	0.163452	0.154497
	12	2.29581	2.25213	2.29749	2.62137	0.232146	0.140519	0.492259	0.603099	1.22189	1.09577	1.06127	0.349229	0.0246832	0.276548	0.264671	0.170114	0.302558
	13	2.2522	2.47582	2.62627	0.126578	0.286626	0.252076	0.450782	0.658399	1.24146	1.23639	0.75749	0.0505236	0.292739	0.0898128	0.251587	0.404544	0.39012
	14		2.54342	2.51812	0.285658	0.749607	0.559344	0.64058	0.591746	1.50694	1.85809	2.38115	0.219197	3.0922	0.138747	0.48136	0.479769
	15			2.6638	0.742997	0.5703	0.602847	0.607129	0.453989	2.29768	2.17902	2.04815	1.9814	0.431688	0.554082	0.608778
	16				0.643231	0.558671	0.574229	0.354773	0.30619	2.10101	2.00068	1.95059	1.60138	0.947269	0.851634
	17					0.558365	0.633119	0.337949	1.83108	1.8693	1.74564	1.79655	1.5897	0.848536
3	1					1.72288	1.46357	1.1085	1.11905	1.10859	0.996791	0.985076	0.879389	0.0151375					3																		3
	2				2.82921	1.99368	1.77278	0.851854	0.837452	0.961281	1.01234	0.569304	0.521935	0.408889	2.84424
0.00373946	3			0.177338	2.57496	2.15055	1.94875	0.782849	0.753234	0.957441	0.770018	0.394926	0.343134	0.323626	3.13158	2.88088
	4		1.43219	1.53785	2.23333	1.72834	1.42496	0.934005	1.03283	0.821208	0.474217	0.303745	0.208266	0.165027	0.0880116	3.12066	2.99149
	5	1.03257	1.29216	1.2035	1.37441	1.23068	1.34256	1.39074	1.79116	2.68629	0.163834	0.344766	0.250522	0.163868	0.105882	0.0435014	0.0197497	3.06754
	6	0.906645	1.13079	1.00071	1.03192	0.955277	1.10203	1.38102	2.08901	2.52793	2.53984	0.195075	0.21396	0.0381114	0.113433	0.168598	0.168612	0.0849152
	7	0.959726	0.997526	0.884501	0.834491	0.82626	0.837155	1.0849	2.78554	2.48437	2.52357	0.892866	0.162982	0.0908204	0.16403	0.227676	0.159878	0.0925268
	8	0.369044	0.511007	0.603255	0.50985	0.40489	0.417525	0.520053	0.217742	2.7922	2.98551	0.59451	0.467696	0.232413	0.41339	0.248302	0.0482903	0.109736
	9	2.78097	2.93216	2.88736	3.04893	0.110189	0.251872	0.465565	0.303783	2.4917	0.475163	0.685649	0.616123	0.536451	0.41708	0.299259	0.211263	0.125565
	10	2.67656	2.66775	2.63149	2.67303	2.91898	0.254957	0.50902	0.497357	0.594396	0.312882	0.808764	0.53118	0.381949	0.395964	0.21612	0.19061	0.123484
	11	2.44857	2.45385	2.30579	1.77188	0.406985	0.331434	0.347252	0.449826	0.564973	0.586697	0.532097	0.577621	0.360928	0.198286	0.278342	0.278059	0.225918
	12	2.24992	2.38036	2.30037	0.101443	0.367979	0.37076	0.291613	0.519928	0.675247	0.652235	0.89305	0.571677	0.222702	0.377897	0.316607	0.363425	0.345219
	13	2.39474	2.51347	2.38047	0.382784	0.434376	0.382345	0.366965	0.499076	0.857487	0.961471	1.74924	2.45252	0.0862888	0.421951	0.408056	0.48156	0.603836
	14		2.39019	2.15753	0.927259	0.547986	0.519365	0.495697	0.557105	0.896958	1.60599	2.06152	1.77412	2.69598	0.901137	0.904443	0.797935
	15			2.07407	1.21882	0.804223	0.807844	0.697833	0.733043	1.21696	1.80139	1.94857	2.06637	2.0514	1.06329	1.02084
	16				0.391217	0.759727	0.857821	0.793166	0.828626	1.61495	1.79989	1.9519	1.97179	1.54543	1.10774
	17					1.21744	1.26809	1.28508	1.66108	1.79637	1.7538	1.91361	1.9529	1.49055
4	1					1.38086	1.36481	1.00647	0.893194	0.987538	0.844466	0.877246	0.863088	2.46445					4																		4
	2				0.170809	2.74334	1.09491	0.565544	0.523028	0.646521	0.7047	0.512349	0.492491	0.0166403	2.71962
0.00333065	3			0.0395326	2.83367	2.44224	0.658227	0.167927	0.626694	0.435651	0.221984	0.260764	0.137711	0.0803599	2.96315	2.84706
	4		1.52306	1.61758	2.31169	1.60831	1.54195	2.17325	2.37068	2.7957	3.13362	0.0990291	0.153507	0.109259	3.12303	3.0341	2.88778
	5	0.906649	1.31307	1.36737	1.85875	1.44934	1.32905	1.82419	2.39738	2.6432	2.81132	3.09057	0.150801	0.161928	0.0599946	3.12223	3.02486	2.94879
	6	0.842824	1.15324	1.12425	1.08979	1.03383	1.47113	2.2143	2.46002	2.6462	2.81377	2.92887	0.144767	0.124726	0.0979201	0.0490206	3.10439	3.0899
	7	1.12009	1.05454	0.967757	0.791011	0.626719	2.47029	2.55082	2.62571	2.71471	2.85216	3.07725	0.106512	0.158135	0.140915	0.0777138	0.0992113	3.13521
	8	2.78369	0.104087	0.150007	0.289446	0.0716376	0.0330074	3.13953	2.92006	2.8415	2.94698	0.216781	0.561858	0.586081	0.257958	0.165191	0.0487934	0.0162874
	9	2.69977	2.57455	2.61646	2.67518	3.00031	0.0643208	0.346633	3.13943	2.89741	3.10393	0.857221	0.718749	0.225365	0.205626	0.0476351	0.025334	3.12852
	10	2.55781	2.49676	2.3697	2.52417	2.5666	0.0318644	0.411194	0.217432	0.417992	0.129342	1.08217	0.384699	0.0662714	0.192855	0.0278301	3.08092	0.0264104
	11	2.30134	2.25632	2.24612	2.20819	2.60012	0.0864056	0.434606	0.404139	0.427252	3.02257	0.263372	2.94848	0.0237696	0.0136668	0.107304	0.164613	0.183675
	12	2.20674	2.19795	2.20228	2.37681	2.84917	0.00334807	0.463828	0.456359	0.507148	0.449827	3.03899	2.92032	2.85956	3.07347	0.0939418	0.257235	0.298587
	13	2.29311	2.39994	2.44102	2.61147	3.13093	0.26052	0.368883	0.676256	0.762376	0.476238	0.148032	2.90317	2.83488	3.05713	0.168695	0.389309	0.444367
	14		2.4886	2.35662	0.501158	0.4239	0.530354	0.590863	0.770884	0.998701	1.10634	2.74232	2.83632	2.74747	2.9437	0.363598	0.543987
	15			2.1403	0.58667	0.735888	0.605808	0.695901	1.02314	1.19395	1.25236	2.89022	2.95914	0.0485129	0.419324	0.570763
	16				0.209274	0.730432	0.542056	0.0662431	1.54708	1.50476	1.46126	2.03806	0.244117	0.398247	0.741008
	17					1.5409	1.30557	1.25395	1.95252	1.68345	1.6142	1.59588	1.24673	0.470659
5	1					1.52225	1.64223	1.2024	1.2833	1.15407	1.15113	1.11831	0.885765	2.63642					5																		5
	2				1.18503	1.61115	1.46174	0.902209	0.946348	1.08005	1.18699	0.413525	0.342416	0.0396196	2.69122
	3			1.01609	1.93083	1.78533	1.52777	0.940828	0.9735	1.02838	0.718518	0.327995	0.244436	0.103163	2.87433	2.70536
	4		1.33543	1.46219	1.88423	1.46974	1.49339	1.32765	1.2802	1.04376	0.341552	0.282041	0.121337	0.0336656	3.05734	2.93454	2.84076
	5	0.927526	1.22587	1.24751	1.24383	1.19037	1.28316	1.6409	1.85017	1.8709	0.0190349	0.389032	0.185734	0.130747	0.104005	3.1303	3.04604	3.09778
	6	0.798344	1.04736	1.03133	0.906603	0.91502	1.14829	1.84091	1.9491	2.51494	2.63709	0.865491	0.120426	0.0858264	0.184339	0.168598	0.148896	0.0668979
	7	0.680153	0.993549	0.933121	0.702389	0.641748	0.690023	2.73507	2.33564	2.59059	2.69356	0.585608	0.187662	0.161159	0.367534	0.204653	0.151592	0.122558
	8	2.64611	0.589581	0.568513	0.370384	0.290279	0.444501	0.211435	0.0282033	2.78851	3.11388	0.545258	0.754808	0.378242	0.488349	0.265815	0.0898705	0.0450712
	9	2.88789	2.88754	2.88178	3.00212	0.0740956	0.356843	0.583917	0.170938	3.06673	0.336075	1.2643	1.09879	1.04671	0.599556	0.067546	0.0485239	0.00574457
	10	2.73114	2.71206	2.61319	2.77436	0.0998185	0.46931	0.73314	0.754183	0.70692	0.128984	1.32907	1.44928	1.94503	2.31349	3.11264	0.0762116	0.0233915
	11	2.39469	2.328	2.33781	0.127789	0.396221	0.333378	0.429802	0.523052	0.579548	0.454935	1.13421	1.59908	2.73127	3.08884	3.09292	0.0551682	0.189916
	12	2.18992	2.31243	2.30331	0.322301	0.399999	0.351102	0.399063	0.696107	0.572536	0.494853	0.268758	2.32092	2.74461	2.98016	3.08652	0.0701493	0.126464
	13	2.1918	2.47757	2.51667	3.14071	0.264784	0.326495	0.461124	0.646654	0.694287	0.581062	3.07751	2.399	2.82272	2.85191	0.0756716	0.256557	0.328329
	14		2.47775	2.39091	0.707896	0.484343	0.494234	0.475054	0.743341	0.905365	1.99364	2.34659	2.28656	2.97875	2.8502	0.0992427	0.316839
	15			2.42388	0.690285	0.708024	0.723098	0.647491	0.76224	1.43855	2.00494	2.05777	1.95685	2.94754	0.197199	0.769379
	16				0.634377	0.598747	0.717734	0.671328	1.25851	1.6905	1.8322	1.88724	1.75896	0.805636	0.872182
	17					1.12579	1.07717	1.27792	1.50966	1.67005	1.68629	1.80648	2.03767	0.573067
6	1					1.59957	1.36874	1.12405	1.17113	1.14206	1.21196	1.06406	1.19904	2.27403					6																		6
	2				0.837311	1.70643	1.31138	0.957776	0.953776	1.02663	1.32359	0.531536	0.156844	2.97843	2.66278
0.00328783	3			0.943956	1.93526	1.68662	1.3375	0.888973	1.01661	1.11048	1.01474	0.351056	0.0930774	3.02784	2.85225	2.81755
	4		1.31072	1.29336	1.6864	1.40101	1.38565	1.08221	1.16912	0.975464	0.67457	0.331656	0.162701	0.0756499	3.01092	2.91045	2.77406
	5	0.906701	1.09317	1.18419	1.37372	1.21187	1.4137	1.56741	1.70877	1.61011	0.231952	0.291501	0.311664	0.174027	0.0546679	3.03456	2.99259	2.91327
	6	0.880829	1.03164	0.969555	0.98953	1.05785	1.38186	1.73892	1.88187	2.15263	2.46894	0.544895	0.387605	0.221553	0.185045	0.098325	0.0301665	0.0264335
	7	1.0084	1.0386	1.00163	0.836013	0.889483	1.26271	1.7403	2.43594	2.42501	2.52656	0.498965	0.248677	0.110524	0.190952	0.14899	0.0897693	0.0951367
	8	0.646014	0.813221	0.712366	0.606293	0.494262	0.361406	0.272985	2.92285	2.74958	2.94892	0.57188	0.485716	0.30148	0.218137	0.0724241	0.114954	0.0544143
	9	2.84991	2.99057	3.11957	0.0708127	0.160919	0.374368	0.442744	0.0611782	2.92519	0.0678115	0.699637	0.897975	3.09102	0.114636	0.16356	0.20184	0.0890907
	10	2.62971	2.75643	2.67959	2.55852	0.0991943	0.297937	0.509972	0.278229	0.567242	3.00971	1.2656	1.24525	0.424323	3.03759	0.0349141	0.0974274	0.0756485
	11	2.51505	2.53999	2.44752	2.3244	0.238248	0.345205	0.452952	0.596898	0.455927	0.823615	1.53981	2.52121	3.0012	2.91756	0.0291509	0.229321	0.314204
	12	2.31732	2.36227	2.34507	3.06885	0.374662	0.514788	0.564362	0.621786	0.760194	0.496713	2.96262	2.76844	2.87795	2.8784	0.0362298	0.279296	0.410088
	13	2.32937	2.52059	2.55064	0.0568048	0.259076	0.339298	0.453212	0.660118	0.791436	0.728792	0.0580411	2.80424	2.82324	2.8582	3.10703	0.369043	0.505937
	14		2.48109	2.31396	0.409165	0.796257	0.55319	0.464701	0.533989	0.643997	1.70572	1.81705	2.1778	2.37451	2.95102	0.354057	0.423435
	15			2.44235	0.605774	0.69066	0.63049	0.585007	0.621367	0.955141	1.57299	1.76017	1.83089	0.324587	1.08012	0.613309
	16				0.269844	0.506735	0.690251	0.316431	0.338697	1.47142	1.64528	1.59408	1.30089	0.551418	0.622469
	17					0.864237	1.02561	0.670849	1.78338	1.54533	1.53917	1.48319	1.22443	0.57811
7	1					1.94873	1.42797	1.06021	1.05486	1.05902	1.12309	1.25323	1.10741	1.80415					7																		7
	2				1.32786	1.82979	1.35809	0.986121	0.855385	1.00494	1.15289	0.517935	0.62464	0.0641044	2.7831
	3			0.828754	1.87163	1.83264	1.79754	1.00468	1.04253	1.06055	0.472805	0.218372	0.245015	0.158308	3.07809	2.90085
	4		1.30169	1.49481	1.87099	1.56384	1.48183	1.4494	1.56749	0.766737	0.162188	0.156719	0.144456	0.171103	0.00887185	3.07801	2.92095
	5	0.941252	1.18503	1.24726	1.53375	1.40856	1.46822	1.85145	2.12119	2.57373	3.06885	0.113596	0.106651	0.169269	0.0549995	0.00540035	3.07828	0.0137241
	6	0.879278	1.20407	1.17242	1.08781	1.06747	1.27868	1.85365	2.30029	2.91193	2.97527	3.04393	0.158426	0.182055	0.16688	0.111314	0.125182	0.0789413
	7	1.14815	1.13898	1.07136	0.834735	0.626846	0.543637	2.99537	2.8711	2.9943	2.85765	3.03807	0.136753	0.123937	0.304619	0.209641	0.162485	0.155977
	8	2.08539	1.27907	0.810003	0.123251	3.1178	0.00895744	0.0869086	0.125184	3.05265	0.093443	0.141612	0.399982	0.504827	0.340789	0.242455	0.106441	0.0625838
	9	2.47066	2.44661	2.34221	2.64212	2.9788	0.113593	0.353773	0.274256	0.265084	0.284432	0.50824	0.776867	0.969841	0.317933	0.259326	0.158301	0.0927489
	10	2.37044	2.29087	2.2976	2.32396	2.8541	0.362307	0.578216	0.605748	0.484965	0.247116	0.968825	1.41479	0.491236	0.125367	0.0790207	0.0416934	0.0680133
	11	2.43558	2.26421	2.23889	2.16417	0.0016435	0.281207	0.598734	0.59855	0.430822	0.605449	0.100431	2.253	0.18289	0.0241187	0.045538	0.144897	0.3141
	12	2.28652	2.24049	2.22376	2.286	0.286226	0.312578	0.689697	0.752988	0.602789	0.47472	0.0519035	2.7041	2.87091	3.08691	2.96935	3.05871	0.3643
	13	2.32661	2.31645	2.22561	1.9707	0.171311	0.323527	0.661412	0.86325	0.82213	0.816121	3.0324	2.76375	2.73359	2.76965	2.99532	0.281517	0.552625
	14		2.29628	2.21511	1.78907	0.588012	0.682362	0.75592	0.98142	1.09522	1.37892	2.91166	2.4839	2.52355	2.5722	2.28851	0.197837
	15			2.20098	1.38302	0.987642	0.918252	0.94076	1.1695	1.29491	1.71675	1.97801	2.37109	2.17458	1.85329	0.933331
	16				1.41932	0.578626	1.08033	1.34171	1.43658	1.59903	1.6931	1.87547	1.89677	1.48883	0.885183
	17					1.36795	1.49451	1.4836	1.65858	1.68345	1.72045	1.75791	1.8826	0.29843
8	1					1.85707	1.41256	1.04042	0.967375	0.998995	1.16983	1.05898	0.948627	2.59941					8																		8
	2				1.19968	2.27867	1.86564	0.714869	0.649188	0.8785	0.810988	0.389314	0.224034	3.07159	2.80587
0.00339067	3			2.22864	2.31987	2.15182	2.28802	0.456642	0.898518	0.903166	0.511883	0.256553	0.193773	0.0372623	3.01556	2.85716
	4		1.50746	1.62871	2.01341	1.64468	1.55019	1.34263	1.89667	1.0083	0.212179	0.244772	0.208638	0.040213	3.10025	3.02311	2.89141
	5	0.932808	1.31573	1.35905	1.58055	1.28891	1.37719	1.70291	2.05201	2.58238	0.113417	0.337908	0.231705	0.167135	0.0418541	3.06474	3.0484	3.04634
	6	0.94469	1.16592	1.15044	1.09606	1.02096	1.31929	1.91271	2.14988	2.53848	2.89034	0.349345	0.190435	0.0906801	0.134926	0.0310685	0.0976044	0.00116386
	7	1.09343	1.06001	0.932893	0.804462	0.747422	0.869934	2.16488	2.32992	2.66351	2.96646	0.373982	0.414537	0.189237	0.136361	0.120357	0.110849	0.083193
	8	2.04811	0.79033	0.63381	0.184302	0.139667	0.183946	3.09875	3.0348	2.94021	0.237799	0.357698	0.580025	0.314192	0.200619	0.168309	0.0173594	0.0281992
	9	2.91637	2.72841	2.83636	2.81296	2.89515	0.262843	0.448995	0.302809	0.27216	0.472917	0.754394	0.665955	0.289074	0.243964	0.0992329	3.13026	0.00789627
	10	2.60558	2.3614	2.36295	2.37664	2.87205	0.985133	0.89823	0.60395	0.573946	0.351187	0.779723	0.416053	0.419303	0.135459	0.0696602	0.0108782	3.13499
	11	2.49834	2.26335	2.24183	2.31785	2.92884	3.03905	0.304051	0.313986	0.623293	0.726726	0.6425	3.13374	3.12487	3.11472	0.100012	0.0608775	0.0262273
	12	2.31986	2.25857	2.23023	2.45247	0.129995	0.193878	0.240196	0.510524	0.703769	0.637102	0.431673	3.07998	2.9958	3.0776	0.0571257	0.123308	0.154714
	13	2.29186	2.48544	2.40644	2.79613	0.341345	0.284452	0.307989	0.66792	0.761788	0.511115	0.172946	2.86272	2.96014	2.98708	0.170951	0.402922	0.395626
	14		2.35645	2.3098	0.471349	0.556206	0.438714	0.418359	0.67661	0.838573	1.21078	2.16144	2.62303	2.7591	2.7818	0.500469	0.669923
	15			2.19239	0.884217	0.688645	0.662456	0.555008	0.66296	1.28056	1.71484	1.66307	2.38921	2.62449	0.443413	0.736699
	16				0.491836	0.538876	0.545937	0.511071	0.954251	1.57216	1.66357	1.80627	1.80344	1.13504	0.85015
	17					1.00573	0.91792	0.635748	1.18182	1.69477	1.64769	1.73598	1.52113	0.954636
9	1					1.55822	1.34232	1.02632	0.989292	1.13046	1.23113	0.858875	0.877312	2.18523					9																		9
	2				2.9999	1.71288	1.20118	0.832215	0.853294	0.982511	1.00264	0.411705	0.481953	0.0764568	2.79626
0.00404611	3			0.228857	2.97798	2.19503	1.07542	0.781306	0.863729	1.03961	0.64715	0.372205	0.349097	0.201565	3.13464	2.99619
	4		1.54877	1.82203	2.44275	1.81681	1.41907	0.994883	1.20868	0.755051	0.392357	0.340704	0.348687	0.154322	0.070248	0.0280748	3.04165
	5	0.896186	1.19993	1.26657	2.00042	1.01889	1.29955	1.56248	1.77363	2.19079	0.272053	0.340794	0.313588	0.196687	0.182528	0.122274	0.0047554	3.09035
	6	0.721468	1.16638	1.03423	1.03233	1.01118	1.0948	1.70272	1.90398	2.81579	0.13048	0.31589	0.280779	0.256602	0.247414	0.190273	0.192964	0.0474911
	7	0.712831	1.04131	0.90272	0.753097	0.58821	0.739519	1.45191	2.3346	2.98482	2.94154	0.380914	0.273616	0.326086	0.333326	0.282374	0.288333	0.107478
	8	0.00485169	0.0786327	0.187287	0.181599	0.292949	0.2709	0.401444	0.269014	3.0246	3.1353	0.601855	0.650613	0.576535	0.400392	0.326644	0.133537	0.165416
	9	2.69969	2.72969	2.77185	2.82599	2.99243	0.281287	0.547216	0.495621	0.087804	0.314835	0.567432	0.877811	0.687006	0.361385	0.28256	0.330838	0.194896
	10	2.48617	2.50829	2.56412	2.68427	2.88433	3.10331	0.627968	0.50032	0.749613	0.282401	0.825407	0.592881	0.349637	0.204544	0.212913	0.243641	0.204549
	11	2.48297	2.40149	2.43679	2.6323	0.0189168	0.160814	0.404871	0.314098	0.388489	0.680806	1.11199	0.296086	0.256636	0.251179	0.158074	0.3043	0.304194
	12	2.35118	2.47069	2.33815	2.95466	0.050288	0.37457	0.58299	0.607682	0.640605	0.837312	0.734463	0.32916	0.154615	0.209992	0.221618	0.37792	0.404813
	13	2.32662	2.65116	2.87189	0.0716945	0.194298	0.326472	0.490187	0.628171	0.757434	0.870238	0.924087	0.45877	0.0897477	0.355111	0.445538	0.467307	0.548171
	14		2.54717	2.67938	0.290762	0.668431	0.505889	0.43337	0.56162	0.918649	1.34787	2.22695	0.0387975	0.0644016	0.303195	0.622012	0.529108
	15			2.51308	0.729031	0.852383	0.690951	0.636529	0.847861	1.28734	1.74547	1.85457	2.49848	0.669862	0.47836	0.771714
	16				0.752621	0.667041	0.666288	0.591862	1.5594	1.53245	1.7373	1.74164	1.63969	0.489858	0.660098
	17					0.893883	0.661952	1.05225	1.55709	1.58031	1.62748	1.68846	1.6845	1.13116
10	1					2.30107	1.19731	0.849777	0.845512	1.03077	1.26048	1.24725	1.1712	1.94912					10																		10
	2				2.74159	2.50869	0.816533	0.54947	0.716889	0.895482	0.946089	0.804927	0.601157	0.00298986	2.75406
1.00176	3			2.79367	2.61674	2.48714	0.50229	0.566074	0.779999	0.885085	0.781438	0.563609	0.248804	0.111833	2.9731	2.90913
	4		1.55253	1.6124	1.88444	1.56658	1.21188	0.580742	0.886086	0.538648	0.384616	0.289454	0.0989431	0.0308497	3.1023	3.03891	2.86541
	5	0.908417	1.30933	1.32598	1.61401	0.938727	1.36576	1.68268	2.02663	2.526	2.91952	0.194166	0.215805	0.210771	0.115537	0.0391818	3.09858	3.09634
	6	0.912857	1.16652	1.03186	0.91783	0.838047	1.12986	1.89366	2.21586	2.38457	2.66734	2.75372	0.180825	0.135113	0.160332	0.209139	0.137791	0.0564257
	7	1.05408	0.975038	0.908153	0.790044	0.574319	0.516493	0.0916279	2.67042	2.61486	2.55787	0.518957	0.100411	0.167611	0.267679	0.259244	0.262836	0.121959
	8	0.351539	0.31713	0.248551	0.374826	0.216011	0.139977	0.350002	3.06835	2.94649	0.0721959	0.671172	0.511577	0.139077	0.304273	0.19892	0.0329894	0.10467
	9	2.83247	2.86259	2.83294	3.07446	3.03387	0.186071	0.419452	0.100823	0.145342	0.385751	0.922392	0.97837	2.75573	0.138567	0.159958	0.0643139	0.0760925
	10	2.55941	2.56863	2.53263	2.71207	2.94889	0.151084	0.408842	0.318175	0.654689	0.417412	1.23824	1.28365	2.96741	2.83711	0.0302046	3.07072	0.0891946
	11	2.59316	2.43913	2.32406	2.394	0.071764	0.108522	0.274813	0.472846	0.526723	0.529254	1.46556	2.29159	2.99031	2.90751	0.0632978	0.135719	0.289038
	12	2.31731	2.27183	2.21506	2.30705	0.11332	0.330409	0.202291	0.53993	0.553797	1.44169	2.0856	2.62908	2.87893	3.00381	0.088184	0.200894	0.394641
	13	2.33338	2.56716	2.45515	2.77177	0.344851	0.334816	0.296086	0.500837	0.999516	1.20944	0.665236	3.00435	2.82528	2.89587	0.0262299	0.213076	0.6364
	14		2.53044	2.39627	0.886739	0.670371	0.484985	0.445181	0.737914	1.23197	1.77139	2.05351	1.19036	2.73361	0.578237	0.574424	0.624756
	15			2.712	0.889961	0.659496	0.704581	0.566874	1.43948	1.52756	1.9157	1.87019	1.69585	0.738616	0.52565	0.78581
	16				0.616259	0.418434	0.504259	0.623343	2.07771	1.79105	1.86953	1.88466	1.69317	1.04104	0.842834
	17					0.976006	0.923132	1.53361	2.0259	1.82926	1.75714	1.83053	1.47168	0.934008
